# Supplementary material for: The cerebellum ages slowly according to the epigenetic clock
Source: Aging (Albany NY). 2015 May 11;7(5):294–306. doi: 10.18632/aging.100742 (PMC4468311; doi:10.18632/aging.100742)
Supplement: Supplementary file 2 [file aging-07-0294-s002.xlsx]

## Sheet: datMetaAnalysis
Illumina mRNA ID	Gene	Entrez_Gene_ID	TstatisticCRBMvsFCTX	TstatisticCRBMvsTCTX	TstatisticCRBMvsPONS	pValueExtremeScale	pValueLowScale	pValueHighScale	qValueLowScale	qValueHighScale	ForEnrichmentQvalue05
ILMN_1717337	MARCH7	64844	19.2535	25.228	28.9341	0.00246105	0.998769	0.00123053	1	0.028948	UpCRBM
ILMN_1787689	A2BP1	54715	16.3612	26.1738	31.3313	0.00213675	0.998932	0.00106838	1	0.0269328	UpCRBM
ILMN_1784269	AASDH	132949	18.2845	30.597	33.3765	0.000333803	0.999833	0.000166901	1	0.00825044	UpCRBM
ILMN_1784176	ABCA5	23461	21.6728	24.9454	27.4792	0.00222039	0.99889	0.00111019	1	0.0273955	UpCRBM
ILMN_1776119	ABCC10	89845	18.2088	28.2325	31.876	0.000835497	0.999582	0.000417748	1	0.0146284	UpCRBM
ILMN_1651964	ABCC5	10057	27.0135	30.7714	31.8939	6.03663e-05	0.99997	3.01831e-05	1	0.00269381	UpCRBM
ILMN_1717701	ABCD4	5826	18.2935	28.1684	28.8852	0.00161533	0.999192	0.000807665	1	0.0222039	UpCRBM
ILMN_1785424	ABLIM1	3983	35.6104	35.4427	35.4044	5.07595e-07	1	2.53797e-07	1	0.000220762	UpCRBM
ILMN_1684271	ACBD6	84320	3.8694	26.1089	38.6189	0.00509123	0.997454	0.00254561	1	0.0469426	UpCRBM
ILMN_1716480	ACD	65057	20.6983	29.9292	30.3975	0.000468703	0.999766	0.000234352	1	0.0100753	UpCRBM
ILMN_1699636	ACIN1	22985	20.2201	33.6307	31.4883	0.000162952	0.999919	8.14758e-05	1	0.00499298	UpCRBM
ILMN_1750800	ACO1	48	15.1882	26.8343	28.1168	0.0044953	0.997752	0.00224765	1	0.0432304	UpCRBM
ILMN_1652594	ACTR5	79913	11.6429	31.6981	39.9514	0.000228199	0.999886	0.000114099	1	0.00628085	UpCRBM
ILMN_1713751	ADAM19	8728	19.0459	29.0912	27.657	0.00148787	0.999256	0.000743937	1	0.0209516	UpCRBM
ILMN_1727524	ADAM9	8754	25.3591	28.196	31.6258	0.000185858	0.999907	9.2929e-05	1	0.0054538	UpCRBM
ILMN_1739872	ADAMTS18	170692	19.03	27.5482	27.1662	0.00229824	0.998851	0.00114912	1	0.0279518	UpCRBM
ILMN_1679797	ADARB1	104	22.1823	27.706	24.943	0.00192668	0.999037	0.00096334	1	0.0250243	UpCRBM
ILMN_1760143	ADRM1	11047	18.8925	31.0739	30.1588	0.000561015	0.999719	0.000280508	1	0.0114602	UpCRBM
ILMN_1725889	AFF2	2334	27.0595	28.4463	25.4194	0.000539074	0.99973	0.000269537	1	0.0111483	UpCRBM
ILMN_1792109	AFG3L1	172	28.1976	35.6084	31.1637	1.44826e-05	0.999993	7.2413e-06	1	0.00110028	UpCRBM
ILMN_1791006	AHI1	54806	18.7874	24.5221	26.2272	0.00533177	0.997334	0.00266588	1	0.0481988	UpCRBM
ILMN_1686846	AKAP12	9590	25.0455	29.205	32.3937	0.000127731	0.999936	6.38653e-05	1	0.00426743	UpCRBM
ILMN_1741572	AKAP8	10270	14.9988	29.3386	36.1274	0.000479982	0.99976	0.000239991	1	0.010238	UpCRBM
ILMN_1771411	ALG6	29929	16.459	26.976	28.1106	0.00346309	0.998268	0.00173155	1	0.0367585	UpCRBM
ILMN_1758038	ALKBH1	8846	15.7674	30.6278	33.843	0.000514958	0.999743	0.000257479	1	0.0107976	UpCRBM
ILMN_1680996	ALOX5	240	22.1278	23.9682	23.5215	0.00552248	0.997239	0.00276124	1	0.0494792	UpCRBM
ILMN_1750256	ALS2	57679	33.7436	34.017	35.585	1.31563e-06	0.999999	6.57817e-07	1	0.00031724	UpCRBM
ILMN_1663897	ALS2CR16	130029	17.8551	28.4381	30.3823	0.00119979	0.9994	0.000599895	1	0.0181804	UpCRBM
ILMN_1788239	AMDHD1	144193	19.0017	27.9002	22.8392	0.00516901	0.997415	0.00258451	1	0.0473046	UpCRBM
ILMN_1665331	AMT	275	27.1188	29.3519	30.2409	0.000131013	0.999934	6.55067e-05	1	0.0043509	UpCRBM
ILMN_1772612	ANGPTL2	23452	28.7232	27.3248	17.7406	0.00267429	0.998663	0.00133714	1	0.0309961	UpCRBM
ILMN_1684694	ANK1	286	30.1047	29.8429	20.8799	0.000585261	0.999707	0.00029263	1	0.0117309	UpCRBM
ILMN_1657016	ANK3	288	21.5263	30.3164	23.1203	0.00186125	0.999069	0.000930625	1	0.0244899	UpCRBM
ILMN_1735364	ANKFY1	51479	16.4371	25.2314	32.4731	0.00201507	0.998992	0.00100753	1	0.0259294	UpCRBM
ILMN_1801464	ANKFY1	51479	19.7609	25.1918	27.3879	0.00309854	0.998451	0.00154927	1	0.0342662	UpCRBM
ILMN_1765091	ANKHD1	54882	20.6654	32.2591	32	0.000181983	0.999909	9.09915e-05	1	0.00538282	UpCRBM
ILMN_1711828	ANKRD10	55608	20.3511	28.2974	29.0655	0.000995075	0.999502	0.000497537	1	0.016043	UpCRBM
ILMN_1661833	ANKRD12	23253	21.0832	32.0464	34.4847	9.21558e-05	0.999954	4.60779e-05	1	0.00350541	UpCRBM
ILMN_1697594	ANKRD28	23243	17.1508	23.7774	28.8804	0.00492297	0.997539	0.00246149	1	0.0459643	UpCRBM
ILMN_1669259	ANKRD49	54851	22.286	30.7244	33.3038	0.000131805	0.999934	6.59025e-05	1	0.0043533	UpCRBM
ILMN_1813669	ANKS1A	23294	20.9837	35.8025	34.7721	3.21727e-05	0.999984	1.60863e-05	1	0.0017843	UpCRBM
ILMN_1669377	AP4B1	10717	24.3453	35.8173	39.16	3.65542e-06	0.999998	1.82771e-06	1	0.000513239	UpCRBM
ILMN_1754531	AP4E1	23431	19.1006	31.5062	29.8923	0.000516437	0.999742	0.000258218	1	0.0108081	UpCRBM
ILMN_1659463	APAF1	317	21.2327	31.3145	33.4176	0.000141218	0.999929	7.06091e-05	1	0.00456674	UpCRBM
ILMN_1815051	API5	8539	15.0633	28.6857	29.6713	0.00230661	0.998847	0.0011533	1	0.0280229	UpCRBM
ILMN_1710482	APLP2	334	15.4344	27.9664	29.8928	0.00238036	0.99881	0.00119018	1	0.0284311	UpCRBM
ILMN_1689665	APPBP1	8883	16.2365	30.8503	34.0265	0.00042261	0.999789	0.000211305	1	0.0096049	UpCRBM
ILMN_1765076	APPL2	55198	25.5849	32.3386	30.7673	7.63903e-05	0.999962	3.81951e-05	1	0.00318542	UpCRBM
ILMN_1717154	AQR	9716	14.4602	29.524	35.5488	0.00059134	0.999704	0.00029567	1	0.011797	UpCRBM
ILMN_1699703	ARCN1	372	11.2308	33.6443	31.4238	0.00117142	0.999414	0.00058571	1	0.0179219	UpCRBM
ILMN_1731287	ARFGAP3	26286	17.0363	25.5497	27.2533	0.00489882	0.997551	0.00244941	1	0.0458321	UpCRBM
ILMN_1727205	ARHGEF10L	55160	22.0093	25.5617	27.8337	0.00169268	0.999154	0.000846342	1	0.0227579	UpCRBM
ILMN_1796912	ARHGEF7	8874	12.2147	32.1476	35.8595	0.000485046	0.999757	0.000242523	1	0.0102674	UpCRBM
ILMN_1797341	ARID1A	8289	16.1275	34.2271	40.3309	3.66344e-05	0.999982	1.83172e-05	1	0.0019595	UpCRBM
ILMN_1795247	ARID2	196528	22.8082	26.5794	27.9709	0.00112176	0.999439	0.000560881	1	0.0174266	UpCRBM
ILMN_1792825	ARIH2	10425	17.6003	36.4166	32.6166	0.000111659	0.999944	5.58295e-05	1	0.00399523	UpCRBM
ILMN_1688526	ARL5A	26225	18.4177	26.9089	27.7571	0.00260836	0.998696	0.00130418	1	0.0304401	UpCRBM
ILMN_1665869	ARMC8	25852	27.9335	30.9131	30.2962	7.1005e-05	0.999964	3.55025e-05	1	0.00300606	UpCRBM
ILMN_1743345	ARMCX4	158947	18.4946	25.6146	29.8737	0.00215892	0.998921	0.00107946	1	0.0271057	UpCRBM
ILMN_1672161	ARPP-21	10777	16.3724	23.9798	28.84	0.00548655	0.997257	0.00274328	1	0.0493088	UpCRBM
ILMN_1720604	ARSG	22901	18.2724	29.1998	30.3396	0.000939455	0.99953	0.000469728	1	0.0155648	UpCRBM
ILMN_1677226	ARVCF	421	21.4393	25.0218	25.045	0.00376954	0.998115	0.00188477	1	0.0386073	UpCRBM
ILMN_1654385	ASB13	79754	11.0861	31.4848	31.0307	0.00208691	0.998957	0.00104345	1	0.0264247	UpCRBM
ILMN_1783675	ASB8	140461	7.77145	30.9526	31.0123	0.00436021	0.99782	0.0021801	1	0.0424963	UpCRBM
ILMN_1705928	ASCC3L1	23020	24.1932	30.8716	33.2423	8.18121e-05	0.999959	4.09061e-05	1	0.00329986	UpCRBM
ILMN_1726025	ASXL1	171023	17.4476	34.9914	35.4343	8.0328e-05	0.99996	4.0164e-05	1	0.00328782	UpCRBM
ILMN_1698968	ASXL2	55252	18.4711	30.3287	29.1677	0.000912247	0.999544	0.000456123	1	0.0154249	UpCRBM
ILMN_1688964	ATF4	468	17.7681	28.8819	29.8267	0.00125273	0.999374	0.000626365	1	0.0187521	UpCRBM
ILMN_1770579	ATG16L1	55054	12.5207	26.5366	35.5373	0.00171525	0.999142	0.000857625	1	0.02295	UpCRBM
ILMN_1812161	ATG4A	115201	22.8182	34.1714	34.218	3.6745e-05	0.999982	1.83725e-05	1	0.0019595	UpCRBM
ILMN_1654541	ATP6V1G2	534	17.24	28.7853	29.2736	0.00160465	0.999198	0.000802327	1	0.0222039	UpCRBM
ILMN_1722056	ATP7B	540	27.2053	30.3101	32.7474	5.17749e-05	0.999974	2.58874e-05	1	0.0025188	UpCRBM
ILMN_1782057	ATP8B2	57198	24.8307	29.4235	31.6409	0.000153995	0.999923	7.69974e-05	1	0.00478462	UpCRBM
ILMN_1721741	ATPBD1B	54707	16.3979	25.996	26.804	0.00550065	0.99725	0.00275033	1	0.0493634	UpCRBM
ILMN_1674265	AVIL	10677	21.1996	27.7029	28.9744	0.000972943	0.999514	0.000486472	1	0.0158704	UpCRBM
ILMN_1670695	BACH2	60468	16.3311	25.2175	27.9078	0.00521906	0.99739	0.00260953	1	0.0474873	UpCRBM
ILMN_1728514	BAG5	9529	13.2041	29.0713	35.0866	0.000948923	0.999526	0.000474462	1	0.0156862	UpCRBM
ILMN_1706493	BARHL2	343472	17.6112	27.3885	31.6902	0.00118857	0.999406	0.000594287	1	0.0180846	UpCRBM
ILMN_1686626	BAT1	7919	19.6995	26.6449	24.8675	0.00389959	0.99805	0.00194979	1	0.0393578	UpCRBM
ILMN_1789526	BAT5	7920	15.3179	35.8782	34.5892	0.000132355	0.999934	6.61774e-05	1	0.00435632	UpCRBM
ILMN_1815475	BAZ1B	9031	14.8707	29.7998	30.049	0.00174865	0.999126	0.000874325	1	0.0232288	UpCRBM
ILMN_1720850	BAZ2B	29994	25.2117	32.2742	24.7175	0.000387577	0.999806	0.000193788	1	0.00906963	UpCRBM
ILMN_1786433	BCCIP	56647	23.7775	29.1068	30.9027	0.000255081	0.999872	0.00012754	1	0.00680133	UpCRBM
ILMN_1737314	BCL6	604	26.3238	29.3897	30.5217	0.000145579	0.999927	7.27896e-05	1	0.00462683	UpCRBM
ILMN_1704452	BCL9	607	24.1	32.9619	35.7856	2.39346e-05	0.999988	1.19673e-05	1	0.00151704	UpCRBM
ILMN_1775192	BCLAF1	9774	15.9225	27.7394	31.9977	0.00144769	0.999276	0.000723846	1	0.0205606	UpCRBM
ILMN_1799280	BDH1	622	21.7974	31.2894	33.5814	0.000119312	0.99994	5.96561e-05	1	0.00416082	UpCRBM
ILMN_1796685	BEST4	266675	23.6752	29.2612	17.3262	0.00503211	0.997484	0.00251606	1	0.046664	UpCRBM
ILMN_1692773	BET1L	51272	13.5289	32.4811	31.9963	0.000830461	0.999585	0.00041523	1	0.0145982	UpCRBM
ILMN_1692973	BICD1	636	25.5365	30.6669	30.9851	0.000112524	0.999944	5.62621e-05	1	0.00401325	UpCRBM
ILMN_1657164	BICD1	636	20.8204	25.9395	27.3303	0.00219602	0.998902	0.00109801	1	0.0272159	UpCRBM
ILMN_1651375	BICD2	23299	11.0024	29.4885	30.9575	0.0032473	0.998376	0.00162365	1	0.0351749	UpCRBM
ILMN_1801605	BIRC6	57448	20.599	30.8594	30.6854	0.000358928	0.999821	0.000179464	1	0.00867106	UpCRBM
ILMN_1746666	BIVM	54841	19.9	27.624	28.0088	0.0015938	0.999203	0.000796902	1	0.0221535	UpCRBM
ILMN_1692021	BPTF	2186	28.1923	33.7289	32.4319	1.71915e-05	0.999991	8.59576e-06	1	0.00120727	UpCRBM
ILMN_1730019	BRD1	23774	20.8829	28.2412	30.0669	0.000718612	0.999641	0.000359306	1	0.0134257	UpCRBM
ILMN_1758918	BRD2	6046	15.1494	26.4628	30.433	0.00305966	0.99847	0.00152983	1	0.0339717	UpCRBM
ILMN_1732885	BTBD12	84464	19.7528	25.4258	29.6874	0.00182762	0.999086	0.000913809	1	0.0241311	UpCRBM
ILMN_1687743	BTBD7	55727	27.2661	37.0409	36.508	2.49157e-06	0.999999	1.24578e-06	1	0.00043182	UpCRBM
ILMN_1775743	BTG1	694	29.8085	26.8388	30.1729	0.000133891	0.999933	6.69453e-05	1	0.00438087	UpCRBM
ILMN_1792070	BTN2A1	11120	23.6841	30.828	30.2923	0.000198587	0.999901	9.92933e-05	1	0.00570654	UpCRBM
ILMN_1752758	BTN2A2	10385	22.8464	27.9531	25.2748	0.00149222	0.999254	0.000746111	1	0.0209516	UpCRBM
ILMN_1693145	BUB3	9184	20.5814	31.2313	26.2393	0.000931228	0.999534	0.000465614	1	0.0155145	UpCRBM
ILMN_1749210	BUD13	84811	20.6936	40.0728	44.2673	5.5511e-07	1	2.77555e-07	1	0.000220762	UpCRBM
ILMN_1738955	C10ORF104	119504	24.3114	27.1103	30.9482	0.000362283	0.999819	0.000181142	1	0.00867915	UpCRBM
ILMN_1791656	C10ORF137	26098	19.1204	25.9477	29.9502	0.00175161	0.999124	0.000875804	1	0.0232402	UpCRBM
ILMN_1774600	C10ORF28	27291	14.7849	30.1386	27.9834	0.00256219	0.998719	0.0012811	1	0.0299471	UpCRBM
ILMN_1728965	C11ORF57	55216	11.7417	33.7669	34.2627	0.000536157	0.999732	0.000268078	1	0.011144	UpCRBM
ILMN_1773148	C11ORF61	79684	18.9619	29.4978	29.1533	0.000995097	0.999502	0.000497548	1	0.016043	UpCRBM
ILMN_1745497	C12ORF26	84190	23.3679	27.5281	29.2432	0.00060348	0.999698	0.00030174	1	0.0119746	UpCRBM
ILMN_1713189	C12ORF41	54934	31.1254	38.1042	37.3791	4.32439e-07	1	2.16219e-07	1	0.000220762	UpCRBM
ILMN_1795128	C13ORF23	80209	19.1277	25.554	25.0651	0.0051536	0.997423	0.0025768	1	0.0472918	UpCRBM
ILMN_1729976	C13ORF8	283489	18.5826	28.7773	28.5521	0.00143778	0.999281	0.00071889	1	0.0205514	UpCRBM
ILMN_1777708	C14ORF121	90668	22.5752	27.3556	27.824	0.00102416	0.999488	0.00051208	1	0.0163925	UpCRBM
ILMN_1713744	C14ORF132	56967	22.503	25.6291	37.0361	0.000175144	0.999912	8.75721e-05	1	0.00522231	UpCRBM
ILMN_1775121	C14ORF162	56936	17.4198	25.8591	32.6567	0.00139431	0.999303	0.000697156	1	0.0200346	UpCRBM
ILMN_1763091	C14ORF43	91748	17.9431	24.9883	35.5866	0.000789501	0.999605	0.000394751	1	0.0141931	UpCRBM
ILMN_1808956	C15ORF27	123591	30.9936	30.5607	31.7298	2.45659e-05	0.999988	1.2283e-05	1	0.00154821	UpCRBM
ILMN_1747217	C15ORF41	84529	20.5902	27.8928	25.7895	0.00211222	0.998944	0.00105611	1	0.0267146	UpCRBM
ILMN_1727444	C16ORF53	79447	25.2842	25.8174	27.3713	0.000912293	0.999544	0.000456146	1	0.0154249	UpCRBM
ILMN_1658290	C16ORF68	79091	17.524	31.0618	28.7225	0.00104137	0.999479	0.000520686	1	0.01662	UpCRBM
ILMN_1759411	C16ORF79	283870	26.0195	28.2012	27.8513	0.000402862	0.999799	0.000201431	1	0.00932891	UpCRBM
ILMN_1780025	C17ORF56	146705	16.2153	28.1643	26.8142	0.00371081	0.998145	0.00185541	1	0.0383118	UpCRBM
ILMN_1812441	C17ORF63	55731	18.3767	25.5183	27.1064	0.00397498	0.998013	0.00198749	1	0.0398642	UpCRBM
ILMN_1743621	C17ORF69	147081	26.626	32.5121	37.2871	9.09264e-06	0.999995	4.54632e-06	1	0.000840463	UpCRBM
ILMN_1672554	C17ORF81	23587	10.2886	30.8722	33.4209	0.00166829	0.999166	0.000834146	1	0.0225118	UpCRBM
ILMN_1730294	C18ORF37	125476	7.23491	32.3283	29.3786	0.00506699	0.997467	0.00253349	1	0.0468359	UpCRBM
ILMN_1801697	C19ORF46	163183	34.058	34.1304	26.5684	1.75235e-05	0.999991	8.76175e-06	1	0.00120727	UpCRBM
ILMN_1698560	C19ORF6	91304	15.0827	29.1155	29.4634	0.00219489	0.998903	0.00109744	1	0.0272159	UpCRBM
ILMN_1660840	C1ORF121	51029	30.2098	32.5737	34.9623	6.70324e-06	0.999997	3.35162e-06	1	0.000699026	UpCRBM
ILMN_1783996	C1ORF176	64789	19.5767	35.9572	37.747	1.92773e-05	0.99999	9.63866e-06	1	0.00128038	UpCRBM
ILMN_1790202	C1ORF35	79169	19.6888	28.0194	30.8629	0.000809792	0.999595	0.000404896	1	0.0144409	UpCRBM
ILMN_1780268	C1ORF56	54964	17.6377	27.5019	28.2794	0.00240356	0.998798	0.00120178	1	0.0284832	UpCRBM
ILMN_1657144	C1ORF69	200205	17.1747	26.6417	29.8313	0.00227003	0.998865	0.00113502	1	0.0277304	UpCRBM
ILMN_1681118	C1QDC1	65981	20.7188	27.8783	29.1662	0.000989845	0.999505	0.000494922	1	0.016043	UpCRBM
ILMN_1720188	C20ORF11	54994	18.6763	31.1756	45.1115	1.15345e-05	0.999994	5.76726e-06	1	0.000962621	UpCRBM
ILMN_1693004	C20ORF117	140710	24.6268	24.8341	25.9562	0.00176329	0.999118	0.000881645	1	0.0233673	UpCRBM
ILMN_1674394	C20ORF3	57136	23.6678	28.5647	28.8871	0.0004834	0.999758	0.0002417	1	0.0102521	UpCRBM
ILMN_1685586	C20ORF67	63935	17.2969	25.6954	26.3906	0.00537836	0.997311	0.00268918	1	0.0485015	UpCRBM
ILMN_1712386	C21ORF45	54069	16.0518	29.6239	34.7783	0.000491115	0.999754	0.000245558	1	0.010367	UpCRBM
ILMN_1776147	C21ORF59	56683	15.1046	31.7614	28.928	0.00139621	0.999302	0.000698103	1	0.0200346	UpCRBM
ILMN_1706859	C22ORF32	91689	26.4633	36.1507	38.5899	2.16004e-06	0.999999	1.08002e-06	1	0.000392774	UpCRBM
ILMN_1661594	C2ORF42	54980	16.2862	34.2482	34.8267	0.000149868	0.999925	7.49338e-05	1	0.00470614	UpCRBM
ILMN_1730631	C2ORF44	80304	21.1353	34.4329	33.8518	5.75386e-05	0.999971	2.87693e-05	1	0.00264821	UpCRBM
ILMN_1728581	C3ORF18	51161	21.032	27.1576	26.4514	0.00196559	0.999017	0.000982796	1	0.0254107	UpCRBM
ILMN_1813768	C3ORF19	51244	24.6407	33.5752	38.9944	6.9046e-06	0.999997	3.4523e-06	1	0.000702622	UpCRBM
ILMN_1754423	C3ORF23	285343	19.8647	29.5278	30.7136	0.00057209	0.999714	0.000286045	1	0.0116171	UpCRBM
ILMN_1797372	C3ORF58	205428	18.2356	27.5978	26.9526	0.0027692	0.998615	0.0013846	1	0.0316245	UpCRBM
ILMN_1679339	C3ORF62	375341	18.3526	27.9349	34.0233	0.000528544	0.999736	0.000264272	1	0.0110407	UpCRBM
ILMN_1661409	C3ORF63	23272	16.5682	29.9776	23.5672	0.00464184	0.997679	0.00232092	1	0.0441572	UpCRBM
ILMN_1665066	C4ORF14	84273	12.5081	34.906	35.1617	0.000278689	0.999861	0.000139344	1	0.00722246	UpCRBM
ILMN_1761963	C4ORF29	80167	23.7158	29.3343	31.9376	0.000189223	0.999905	9.46116e-05	1	0.00549441	UpCRBM
ILMN_1651504	C4ORF8	8603	18.5713	31.514	29.4401	0.000641674	0.999679	0.000320837	1	0.012452	UpCRBM
ILMN_1680738	C5ORF13	9315	26.3305	26.5261	28.2616	0.000506327	0.999747	0.000253163	1	0.0106367	UpCRBM
ILMN_1654542	C5ORF21	83989	17.7309	25.3811	30.0619	0.00252427	0.998738	0.00126214	1	0.0295686	UpCRBM
ILMN_1756673	C5ORF37	134359	19.2548	34.2368	24.6346	0.00089924	0.99955	0.00044962	1	0.0153216	UpCRBM
ILMN_1754304	C6ORF151	154007	23.6507	24.9671	24.7778	0.00265706	0.998671	0.00132853	1	0.0308609	UpCRBM
ILMN_1693323	C6ORF162	57150	14.9256	26.3541	29.6464	0.00382424	0.998088	0.00191212	1	0.0389517	UpCRBM
ILMN_1730048	C7ORF26	79034	13.811	32.1239	31.3354	0.000984893	0.999508	0.000492446	1	0.0160182	UpCRBM
ILMN_1671230	C7ORF31	136895	16.7721	26.676	27.6375	0.0038169	0.998092	0.00190845	1	0.0389127	UpCRBM
ILMN_1738514	C7ORF47	221908	24.2339	29.8209	33.8491	9.0793e-05	0.999955	4.53965e-05	1	0.00350135	UpCRBM
ILMN_1760400	C8ORF41	80185	18.0224	39.1693	34.7105	2.76114e-05	0.999986	1.38057e-05	1	0.00165549	UpCRBM
ILMN_1684754	C9ORF39	54875	24.5104	30.9247	31.0866	0.000130846	0.999935	6.54232e-05	1	0.0043509	UpCRBM
ILMN_1697166	C9ORF78	51759	8.25297	31.9385	37.3574	0.000836541	0.999582	0.00041827	1	0.0146284	UpCRBM
ILMN_1659189	C9ORF89	84270	28.4976	39.4525	30.3066	5.623e-06	0.999997	2.8115e-06	1	0.000635835	UpCRBM
ILMN_1684520	C9ORF97	158427	14.6003	30.8993	30.2782	0.00138673	0.999307	0.000693367	1	0.0200021	UpCRBM
ILMN_1665856	CA10	56934	21.9055	30.7913	30.2047	0.000306428	0.999847	0.000153214	1	0.00773044	UpCRBM
ILMN_1762407	CABLES2	81928	21.6363	33.2374	32.8153	9.16592e-05	0.999954	4.58296e-05	1	0.00350541	UpCRBM
ILMN_1711049	CACNA2D2	9254	27.1779	30.4543	22.129	0.000710437	0.999645	0.000355219	1	0.0133562	UpCRBM
ILMN_1682208	CACNB2	783	22.9941	25.6496	27.3334	0.00152161	0.999239	0.000760804	1	0.0213371	UpCRBM
ILMN_1680132	CADM1	23705	23.8498	25.1385	26.0507	0.00188762	0.999056	0.000943811	1	0.0246324	UpCRBM
ILMN_1684461	CADPS2	93664	29.2616	30.0548	35.5449	1.5105e-05	0.999992	7.55251e-06	1	0.00110243	UpCRBM
ILMN_1654376	CARD8	22900	15.1061	26.3304	29.4967	0.00382958	0.998085	0.00191479	1	0.0389704	UpCRBM
ILMN_1736568	CASP2	835	20.5327	31.5588	27.9295	0.000593161	0.999703	0.00029658	1	0.0118121	UpCRBM
ILMN_1756787	CASP3	836	19.5012	24.4784	28.0566	0.00327917	0.99836	0.00163958	1	0.0354163	UpCRBM
ILMN_1662648	CATSPER2	117155	20.7398	24.2959	25.383	0.00462312	0.997688	0.00231156	1	0.0440925	UpCRBM
ILMN_1807540	CBARA1	10367	17.299	30.631	30.8845	0.000737075	0.999631	0.000368538	1	0.0136261	UpCRBM
ILMN_1775637	CBFA2T3	863	21.5777	25.5971	30.0019	0.00114071	0.99943	0.000570356	1	0.0176002	UpCRBM
ILMN_1685580	CBLB	868	25.3257	26.0111	25.2055	0.00140193	0.999299	0.000700965	1	0.0200907	UpCRBM
ILMN_1712461	CBLN1	869	30.3658	29.4791	28.7878	8.52083e-05	0.999957	4.26042e-05	1	0.00339551	UpCRBM
ILMN_1804735	CBS	875	21.8029	25.9973	23.6853	0.00381349	0.998093	0.00190674	1	0.0389127	UpCRBM
ILMN_1709630	CCDC107	203260	17.7823	25.1744	30.9521	0.00216513	0.998917	0.00108257	1	0.0271057	UpCRBM
ILMN_1672759	CCDC109A	90550	31.102	31.1342	31.5681	2.13102e-05	0.999989	1.06551e-05	1	0.00136631	UpCRBM
ILMN_1758633	CCDC130	81576	16.1863	31.0431	26.0924	0.00240906	0.998795	0.00120453	1	0.0285179	UpCRBM
ILMN_1803590	CCDC131	196441	17.3823	24.9112	27.1918	0.00527261	0.997364	0.0026363	1	0.0477808	UpCRBM
ILMN_1686135	CCDC45	90799	30.3558	36.4981	37.9242	7.67695e-07	1	3.83848e-07	1	0.000241121	UpCRBM
ILMN_1720233	CCDC49	54883	10.7251	29.0834	31.7204	0.00317778	0.998411	0.00158889	1	0.0346587	UpCRBM
ILMN_1683533	CCDC66	285331	27.4002	34.4841	35.7123	6.58712e-06	0.999997	3.29356e-06	1	0.000699026	UpCRBM
ILMN_1709227	CCDC84	338657	20.0695	26.0049	29.8075	0.00147759	0.999261	0.000738797	1	0.0208783	UpCRBM
ILMN_1724406	CCDC95	283899	14.0897	29.2805	27.8646	0.00356337	0.998218	0.00178168	1	0.0373581	UpCRBM
ILMN_1801600	CCDC97	90324	16.3842	33.524	28.696	0.000764807	0.999618	0.000382403	1	0.013915	UpCRBM
ILMN_1695357	CCDC99	54908	24.0678	29.6819	31.5825	0.000174906	0.999913	8.74531e-05	1	0.00522231	UpCRBM
ILMN_1795852	CCNE1	898	14.5043	29.3722	30.4726	0.00187961	0.99906	0.000939807	1	0.0245567	UpCRBM
ILMN_1659727	CDAN1	146059	20.9991	28.9837	33.915	0.000234958	0.999883	0.000117479	1	0.0064191	UpCRBM
ILMN_1799688	CDC23	8697	20.5691	27.8283	33.0279	0.00042344	0.999788	0.00021172	1	0.0096049	UpCRBM
ILMN_1651942	CDC25B	994	25.1633	29.0272	30.6854	0.000200156	0.9999	0.000100078	1	0.00573676	UpCRBM
ILMN_1765704	CDC2L1	984	14.6857	29.7351	29.1443	0.00222746	0.998886	0.00111373	1	0.0274522	UpCRBM
ILMN_1778557	CDC2L5	8621	16.2918	26.3158	30.0426	0.00275213	0.998624	0.00137606	1	0.031499	UpCRBM
ILMN_1741801	CDC7	8317	20.7704	26.5205	32.101	0.000682492	0.999659	0.000341246	1	0.0129849	UpCRBM
ILMN_1753183	CDCA4	55038	16.3684	27.8893	36.6045	0.000447071	0.999776	0.000223536	1	0.0098587	UpCRBM
ILMN_1684045	CDCA4	55038	14.5528	28.5557	32.9313	0.00130268	0.999349	0.000651338	1	0.0192467	UpCRBM
ILMN_1784036	CDH15	1013	31.8672	30.2214	30.3583	3.15795e-05	0.999984	1.57897e-05	1	0.00177833	UpCRBM
ILMN_1733669	CDH18	1016	22.8795	28.5757	33.5108	0.000186809	0.999907	9.34044e-05	1	0.00546724	UpCRBM
ILMN_1753586	CDH22	64405	21.6863	26.0192	32.199	0.000615944	0.999692	0.000307972	1	0.0121136	UpCRBM
ILMN_1770425	CDIPT	10423	20.4239	33.3447	33.0139	0.000113125	0.999943	5.65623e-05	1	0.00402172	UpCRBM
ILMN_1689001	CDK4	1019	15.9837	28.56	26.8622	0.00354462	0.998228	0.00177231	1	0.0372672	UpCRBM
ILMN_1711023	CDK5RAP1	51654	14.9179	33.267	40.8542	5.56475e-05	0.999972	2.78237e-05	1	0.00261871	UpCRBM
ILMN_1812557	CDK5RAP3	80279	19.5591	29.6648	28.293	0.00102797	0.999486	0.000513983	1	0.0164297	UpCRBM
ILMN_1787191	CDR2L	30850	26.6465	28.9441	22.9606	0.000923981	0.999538	0.00046199	1	0.0154731	UpCRBM
ILMN_1654690	CECR5	27440	10.7271	29.7096	36.8152	0.000931539	0.999534	0.00046577	1	0.0155145	UpCRBM
ILMN_1691290	CELSR3	1951	20.2366	24.2283	27.0293	0.0037015	0.998149	0.00185075	1	0.0382995	UpCRBM
ILMN_1758778	CEP110	11064	22.1148	32.3193	28.1451	0.000333688	0.999833	0.000166844	1	0.00825044	UpCRBM
ILMN_1742400	CEP350	9857	20.0266	26.714	25.7535	0.00302367	0.998488	0.00151184	1	0.033741	UpCRBM
ILMN_1696675	CES2	8824	10.9481	27.705	35.5247	0.00182963	0.999085	0.000914815	1	0.0241311	UpCRBM
ILMN_1789830	CFLAR	8837	22.8586	24.2712	24.6978	0.0036101	0.998195	0.00180505	1	0.03767	UpCRBM
ILMN_1746801	CGN	57530	26.1772	27.4913	25.7476	0.000750723	0.999625	0.000375361	1	0.0137597	UpCRBM
ILMN_1654583	CHD1	1105	22.5346	23.3586	25.7615	0.00371306	0.998143	0.00185653	1	0.0383118	UpCRBM
ILMN_1786016	CHD1L	9557	18.5574	32.4454	23.7034	0.00187631	0.999062	0.000938156	1	0.0245567	UpCRBM
ILMN_1778930	CHD7	55636	28.1547	30.3838	29.1161	0.000105217	0.999947	5.26085e-05	1	0.00383903	UpCRBM
ILMN_1653828	CHFR	55743	21.3215	33.3852	34.7917	5.64348e-05	0.999972	2.82174e-05	1	0.00262387	UpCRBM
ILMN_1774110	CHN2	1124	24.0547	25.0816	22.943	0.00350274	0.998249	0.00175137	1	0.0370728	UpCRBM
ILMN_1735058	CHST12	55501	20.5485	25.8911	27.5554	0.0022301	0.998885	0.00111505	1	0.0274542	UpCRBM
ILMN_1668910	CIDEB	27141	23.7476	27.6352	28.0584	0.000714183	0.999643	0.000357091	1	0.013399	UpCRBM
ILMN_1732066	CKMT1A	548596	23.8646	28.1199	26.4861	0.000893591	0.999553	0.000446796	1	0.0152922	UpCRBM
ILMN_1763491	CKMT1B	1159	23.2112	25.9795	26.2881	0.00170186	0.999149	0.000850928	1	0.0227983	UpCRBM
ILMN_1688633	CLCN2	1181	22.0444	35.001	29.2832	0.000131871	0.999934	6.59354e-05	1	0.0043533	UpCRBM
ILMN_1684038	CLIP1	6249	18.0653	28.2193	33.0528	0.000659721	0.99967	0.00032986	1	0.0126602	UpCRBM
ILMN_1811652	CLK2	1196	22.1955	35.4639	35.5115	2.10675e-05	0.999989	1.05337e-05	1	0.00135861	UpCRBM
ILMN_1695961	CLK3	1198	18.2869	30.3029	28.5924	0.00108421	0.999458	0.000542103	1	0.0170099	UpCRBM
ILMN_1694584	CLTCL1	8218	24.2423	32.3581	28.0686	0.000208361	0.999896	0.000104181	1	0.00591577	UpCRBM
ILMN_1750596	CLUAP1	23059	10.1941	27.1598	31.7177	0.0051298	0.997435	0.0025649	1	0.0472537	UpCRBM
ILMN_1655720	CNNM4	26504	24.8033	32.8132	35.132	2.49864e-05	0.999988	1.24932e-05	1	0.00156581	UpCRBM
ILMN_1669206	CNOT1	23019	22.736	31.0106	32.9113	0.000121878	0.999939	6.09391e-05	1	0.00419836	UpCRBM
ILMN_1701262	CNOT10	25904	17.9413	40.0218	37.0866	1.12992e-05	0.999994	5.6496e-06	1	0.000962621	UpCRBM
ILMN_1772651	CNOT2	4848	27.6146	31.5769	33.4177	2.75703e-05	0.999986	1.37851e-05	1	0.00165549	UpCRBM
ILMN_1776993	COG2	22796	19.9867	30.7765	28.2505	0.000739834	0.99963	0.000369917	1	0.0136543	UpCRBM
ILMN_1745969	COG3	83548	18.1404	27.7408	26.3771	0.00308233	0.998459	0.00154116	1	0.0341892	UpCRBM
ILMN_1688034	COIL	8161	22.0646	36.7358	41.3812	2.66345e-06	0.999999	1.33173e-06	1	0.000436384	UpCRBM
ILMN_1761380	COL13A1	1305	27.0255	26.5106	27.1098	0.000572894	0.999714	0.000286447	1	0.0116171	UpCRBM
ILMN_1690392	COMMD3	23412	17.8495	26.3375	30.0413	0.00203009	0.998985	0.00101505	1	0.0260623	UpCRBM
ILMN_1764431	COPS6	10980	6.8234	28.4717	34.5369	0.00419715	0.997901	0.00209857	1	0.0415668	UpCRBM
ILMN_1728535	COPZ1	22818	7.56895	28.9788	36.035	0.00242666	0.998787	0.00121333	1	0.0286957	UpCRBM
ILMN_1666364	COQ10A	93058	20.104	29.9601	35.007	0.000172604	0.999914	8.63019e-05	1	0.0052025	UpCRBM
ILMN_1801378	COQ3	51805	12.218	27.9679	31.3604	0.00323824	0.998381	0.00161912	1	0.035111	UpCRBM
ILMN_1783985	COQ6	51004	11.9292	30.8717	34.9561	0.000851119	0.999574	0.00042556	1	0.0147972	UpCRBM
ILMN_1666280	COX11	1353	17.8017	25.7326	27.6396	0.00380606	0.998097	0.00190303	1	0.0389091	UpCRBM
ILMN_1660551	CRAMP1L	57585	26.8188	30.613	33.2095	4.63897e-05	0.999977	2.31948e-05	1	0.00230719	UpCRBM
ILMN_1690122	CRKL	1399	11.102	33.7296	34.0169	0.000656645	0.999672	0.000328323	1	0.0126231	UpCRBM
ILMN_1754923	CRSP7	9441	17.3793	35.7933	40.2007	1.78629e-05	0.999991	8.93146e-06	1	0.00122306	UpCRBM
ILMN_1792597	CRYGS	1427	26.9672	30.6711	29.4789	0.000118033	0.999941	5.90165e-05	1	0.00415339	UpCRBM
ILMN_1795407	CRYZL1	9946	21.6801	29.7633	29.986	0.000433695	0.999783	0.000216847	1	0.00973794	UpCRBM
ILMN_1791182	CS	1431	9.78737	30.2573	32.9105	0.00233456	0.998833	0.00116728	1	0.0281467	UpCRBM
ILMN_1762275	CSE1L	1434	24.6445	30.9184	32.806	8.12681e-05	0.999959	4.0634e-05	1	0.00329426	UpCRBM
ILMN_1653129	CSTF2	1478	20.3916	29.6759	35.7753	0.000142711	0.999929	7.13553e-05	1	0.00460159	UpCRBM
ILMN_1691294	CTBP2	1488	20.6983	26.7542	28.4457	0.00149052	0.999255	0.000745259	1	0.0209516	UpCRBM
ILMN_1688638	CTCF	10664	20.8477	29.6189	31.8886	0.000341883	0.999829	0.000170942	1	0.00835279	UpCRBM
ILMN_1692962	CTDSP2	10106	25.9801	37.1845	33.4102	8.67085e-06	0.999996	4.33543e-06	1	0.000808211	UpCRBM
ILMN_1683444	CTDSPL	10217	16.2188	25.7188	32.5784	0.00185544	0.999072	0.000927719	1	0.0244424	UpCRBM
ILMN_1688103	CTNNBIP1	56998	20.439	35.7716	29.4935	0.000149902	0.999925	7.49511e-05	1	0.00470614	UpCRBM
ILMN_1775872	CTPS2	56474	30.9336	37.217	32.5162	2.85547e-06	0.999999	1.42773e-06	1	0.000452469	UpCRBM
ILMN_1695792	CUL4A	8451	13.6003	30.3017	29.2692	0.00237814	0.998811	0.00118907	1	0.0284311	UpCRBM
ILMN_1687567	CUTL1	1523	17.0154	25.5552	28.1989	0.00407425	0.997963	0.00203713	1	0.040458	UpCRBM
ILMN_1668498	CWF19L2	143884	23.7511	29.0823	29.3117	0.000379784	0.99981	0.000189892	1	0.00895699	UpCRBM
ILMN_1807737	CXYORF3	8227	15.122	30.9973	31.9665	0.000837119	0.999581	0.000418559	1	0.0146284	UpCRBM
ILMN_1714167	CYB5A	1528	21.6817	25.4265	26.9301	0.00225042	0.998875	0.00112521	1	0.0275885	UpCRBM
ILMN_1670925	CYB5D1	124637	17.7958	31.2996	27.0782	0.00134556	0.999327	0.000672782	1	0.0196123	UpCRBM
ILMN_1762498	CYP2R1	120227	14.6258	30.0175	30.4064	0.00162246	0.999189	0.000811231	1	0.0222715	UpCRBM
ILMN_1790008	CYP2U1	113612	14.8185	26.7304	29.9768	0.00338471	0.998308	0.00169236	1	0.0362737	UpCRBM
ILMN_1808850	DAB2IP	153090	19.9307	25.7822	28.1919	0.00224889	0.998876	0.00112445	1	0.0275885	UpCRBM
ILMN_1798984	DACT1	51339	26.5543	24.1352	29.947	0.000566519	0.999717	0.000283259	1	0.0115511	UpCRBM
ILMN_1746257	DAZAP1	26528	19.7525	33.9972	35.1404	6.42965e-05	0.999968	3.21482e-05	1	0.00279677	UpCRBM
ILMN_1776577	DCC1	79075	20.6362	27.1088	25.8334	0.00244229	0.998779	0.00122114	1	0.0287884	UpCRBM
ILMN_1655382	DCLRE1B	64858	19.0216	26.3536	26.1237	0.00363944	0.99818	0.00181972	1	0.037812	UpCRBM
ILMN_1809285	DCP1A	55802	25.4836	33.1496	36.9145	1.1451e-05	0.999994	5.72551e-06	1	0.000962621	UpCRBM
ILMN_1692706	DCUN1D2	55208	28.7988	38.7687	34.9228	1.54123e-06	0.999999	7.70613e-07	1	0.000352692	UpCRBM
ILMN_1763575	DDB1	1642	13.0214	29.0309	39.2238	0.00038097	0.99981	0.000190485	1	0.00895699	UpCRBM
ILMN_1764285	DDX17	10521	27.4038	37.705	34.7228	3.38777e-06	0.999998	1.69389e-06	1	0.000497072	UpCRBM
ILMN_1756220	DDX18	8886	16.2236	32.573	29.2302	0.000868033	0.999566	0.000434016	1	0.0150441	UpCRBM
ILMN_1781721	DDX31	64794	28.1733	32.5295	26.3503	0.000123489	0.999938	6.17445e-05	1	0.00420166	UpCRBM
ILMN_1747303	DDX39	10212	28.4912	39.7495	28.8915	7.85547e-06	0.999996	3.92773e-06	1	0.000744725	UpCRBM
ILMN_1695983	DDX42	11325	5.83711	33.1189	35.8144	0.00148922	0.999255	0.000744611	1	0.0209516	UpCRBM
ILMN_1727001	DDX46	9879	24.2824	28.1756	29.7106	0.000380814	0.99981	0.000190407	1	0.00895699	UpCRBM
ILMN_1814859	DDX47	51202	17.5412	32.7082	37.3653	8.57069e-05	0.999957	4.28534e-05	1	0.00339551	UpCRBM
ILMN_1805344	DDX5	1655	22.6662	26.6031	26.3398	0.00164122	0.999179	0.000820609	1	0.0223527	UpCRBM
ILMN_1712320	DDX50	79009	13.0863	27.9119	36.2269	0.000974384	0.999513	0.000487192	1	0.0158706	UpCRBM
ILMN_1797425	DDX55	57696	21.4264	33.3554	35.4362	4.65932e-05	0.999977	2.32966e-05	1	0.00230719	UpCRBM
ILMN_1748077	DDX59	83479	21.3239	32.9045	30.804	0.000179714	0.99991	8.98568e-05	1	0.00533164	UpCRBM
ILMN_1665414	DDX59	83479	17.6552	28.7275	24.0303	0.00444115	0.997779	0.00222058	1	0.0429212	UpCRBM
ILMN_1663061	DEK	7913	21.9049	23.8967	24.5767	0.00474311	0.997628	0.00237156	1	0.0448896	UpCRBM
ILMN_1695726	DERL1	79139	20.6467	26.2196	35.1133	0.000370248	0.999815	0.000185124	1	0.0087854	UpCRBM
ILMN_1678962	DFFB	1677	18.3766	26.07	25.5115	0.00489157	0.997554	0.00244578	1	0.0458321	UpCRBM
ILMN_1754643	DGCR14	8220	27.0813	29.9408	28.0818	0.000196815	0.999902	9.84074e-05	1	0.00567031	UpCRBM
ILMN_1735301	DGKD	8527	20.6879	27.0704	29.3592	0.00114087	0.99943	0.000570435	1	0.0176002	UpCRBM
ILMN_1687279	DHPS	1725	11.8467	32.3766	30.6784	0.00160365	0.999198	0.000801825	1	0.0222039	UpCRBM
ILMN_1752967	DHPS	1725	14.2561	29.6397	29.3109	0.00238378	0.998808	0.00119189	1	0.0284311	UpCRBM
ILMN_1716922	DHX16	8449	28.3294	47.4825	46.6461	1.34157e-09	1	6.70783e-10	1	1.48807e-05	UpCRBM
ILMN_1697503	DHX29	54505	17.5165	31.7073	30.9881	0.000536502	0.999732	0.000268251	1	0.011144	UpCRBM
ILMN_1730059	DHX33	56919	10.3681	23.8024	37.3848	0.00311423	0.998443	0.00155712	1	0.0344047	UpCRBM
ILMN_1735679	DHX38	9785	16.94	29.1768	37.8415	0.000213708	0.999893	0.000106854	1	0.00600114	UpCRBM
ILMN_1653047	DHX40P	653645	21.4209	29.9846	35.0189	0.000125693	0.999937	6.28467e-05	1	0.00423766	UpCRBM
ILMN_1732226	DHX57	90957	19.0712	30.7557	36.9109	0.000110678	0.999945	5.5339e-05	1	0.00397294	UpCRBM
ILMN_1812934	DIDO1	11083	11.6651	30.6305	28.2829	0.0039198	0.99804	0.0019599	1	0.0394541	UpCRBM
ILMN_1799796	DIS3	22894	22.0541	26.9235	28.2542	0.0011392	0.99943	0.000569601	1	0.0176002	UpCRBM
ILMN_1813517	DISP2	85455	19.3332	26.4056	28.6309	0.00202043	0.99899	0.00101021	1	0.0259682	UpCRBM
ILMN_1671257	DKC1	1736	21.868	37.1983	37.7369	7.36082e-06	0.999996	3.68041e-06	1	0.000716195	UpCRBM
ILMN_1668825	DKFZP686I15217	401232	19.9139	29.7363	27.5635	0.00110698	0.999447	0.000553492	1	0.0172453	UpCRBM
ILMN_1750075	DMTF1	9988	19.3954	27.6486	24.0736	0.00396128	0.998019	0.00198064	1	0.0397634	UpCRBM
ILMN_1803073	DNAJC12	56521	25.265	26.4659	27.5908	0.000752987	0.999624	0.000376493	1	0.0137597	UpCRBM
ILMN_1688505	DNAJC12	56521	24.3244	25.4553	26.5855	0.00143057	0.999285	0.000715286	1	0.0204747	UpCRBM
ILMN_1725773	DNAJC12	56521	22.2823	24.1936	24.7662	0.00402251	0.997989	0.00201125	1	0.0401559	UpCRBM
ILMN_1799516	DNAJC9	23234	27.2291	36.1713	42.1449	5.50953e-07	1	2.75477e-07	1	0.000220762	UpCRBM
ILMN_1760201	DNMT1	1786	31.7255	38.0127	36.7309	4.59912e-07	1	2.29956e-07	1	0.000220762	UpCRBM
ILMN_1726990	DOM3Z	1797	26.9109	37.9297	29.9071	1.50698e-05	0.999992	7.5349e-06	1	0.00110243	UpCRBM
ILMN_1734380	DPF3	8110	34.6082	34.1829	29.9408	5.56951e-06	0.999997	2.78476e-06	1	0.000635835	UpCRBM
ILMN_1767892	DUSP12	11266	20.9622	29.7727	32.3462	0.000287391	0.999856	0.000143695	1	0.00739614	UpCRBM
ILMN_1652163	DVL2	1856	16.5208	26.9323	27.2961	0.00406807	0.997966	0.00203404	1	0.0404328	UpCRBM
ILMN_1761828	E2F4	1874	11.7189	26.6459	30.9918	0.00496439	0.997518	0.00248219	1	0.0461259	UpCRBM
ILMN_1778681	EBF1	1879	26.7122	25.595	25.4939	0.0010875	0.999456	0.00054375	1	0.0170375	UpCRBM
ILMN_1671568	ECHDC2	55268	30.6795	29.2182	29.3151	7.35841e-05	0.999963	3.67921e-05	1	0.00307998	UpCRBM
ILMN_1741253	EDD1	51366	9.74098	25.1835	34.9809	0.00430852	0.997846	0.00215426	1	0.0424047	UpCRBM
ILMN_1711909	EDEM2	55741	27.3907	31.8874	32.4018	3.54902e-05	0.999982	1.77451e-05	1	0.00192285	UpCRBM
ILMN_1789171	EEF2K	29904	25.7747	30.1598	30.9981	0.000120649	0.99994	6.03244e-05	1	0.00418199	UpCRBM
ILMN_1651832	EHD1	10938	26.8236	26.4392	24.3425	0.0011399	0.99943	0.000569951	1	0.0176002	UpCRBM
ILMN_1753716	EIF2B1	1967	12.2568	31.7204	31.5939	0.00139482	0.999303	0.000697411	1	0.0200346	UpCRBM
ILMN_1671921	EIF2B4	8890	13.2935	31.278	31.2588	0.00134092	0.99933	0.000670458	1	0.0195764	UpCRBM
ILMN_1688534	EIF2B5	8893	13.3311	30.3101	30.4882	0.0019341	0.999033	0.000967049	1	0.0250619	UpCRBM
ILMN_1671326	EIF2C1	26523	24.3392	32.5037	37.1696	1.73046e-05	0.999991	8.65229e-06	1	0.00120727	UpCRBM
ILMN_1798014	EIF2S2	8894	17.8267	24.0875	30.153	0.00316891	0.998416	0.00158445	1	0.0346467	UpCRBM
ILMN_1665717	EIF2S3	1968	21.7408	34.7132	37.9593	1.46247e-05	0.999993	7.31234e-06	1	0.00110243	UpCRBM
ILMN_1762725	EIF3S6IP	51386	22.1733	28.4678	30.9532	0.000419859	0.99979	0.00020993	1	0.00960222	UpCRBM
ILMN_1655497	EIF4B	1975	22.842	32.7825	29.7561	0.000169685	0.999915	8.48425e-05	1	0.00517073	UpCRBM
ILMN_1678618	ELAVL3	1995	20.7316	29.1513	28.0483	0.000955714	0.999522	0.000477857	1	0.0157515	UpCRBM
ILMN_1691559	ELF2	1998	30.4168	36.1377	35.2069	2.00301e-06	0.999999	1.0015e-06	1	0.00038242	UpCRBM
ILMN_1736048	ELL	8178	20.3491	27.4123	31.7829	0.00065494	0.999673	0.00032747	1	0.0126122	UpCRBM
ILMN_1771264	ELL3	80237	20.8513	26.4591	29.1427	0.00132325	0.999338	0.000661627	1	0.0194662	UpCRBM
ILMN_1659339	ELP4	26610	19.6054	27.0428	32.9635	0.000635584	0.999682	0.000317792	1	0.01239	UpCRBM
ILMN_1801421	EMD	2010	12.6498	28.0105	30.1731	0.00376707	0.998116	0.00188354	1	0.0386073	UpCRBM
ILMN_1685318	EN2	2020	31.6764	31.3774	30.514	2.30826e-05	0.999988	1.15413e-05	1	0.00147145	UpCRBM
ILMN_1749131	ENPP3	5169	17.3288	26.8127	29.3982	0.00232881	0.998836	0.00116441	1	0.0281323	UpCRBM
ILMN_1673023	EP400	57634	13.4102	26.0692	31.8348	0.00344956	0.998275	0.00172478	1	0.0366851	UpCRBM
ILMN_1667408	EPB41	2035	24.7761	26.4986	27.1486	0.000915323	0.999542	0.000457662	1	0.0154297	UpCRBM
ILMN_1770245	EPB41L5	57669	23.8979	27.9255	29.6395	0.000447073	0.999776	0.000223536	1	0.0098587	UpCRBM
ILMN_1746276	EPC1	80314	20.6517	24.2713	26.42	0.00384144	0.998079	0.00192072	1	0.0389899	UpCRBM
ILMN_1692261	EPHB1	2047	21.4461	24.351	26.7749	0.00303334	0.998483	0.00151667	1	0.0338106	UpCRBM
ILMN_1682658	EPM2AIP1	9852	23.1607	34.717	25.8885	0.00025624	0.999872	0.00012812	1	0.00681586	UpCRBM
ILMN_1740216	ERCC3	2071	15.3129	31.7271	37.0129	0.000203177	0.999898	0.000101588	1	0.00580834	UpCRBM
ILMN_1697735	EWSR1	2130	18.5631	42.5744	44.9408	3.74557e-07	1	1.87278e-07	1	0.000220762	UpCRBM
ILMN_1727041	EWSR1	2130	23.4103	28.8407	43.5535	1.00236e-05	0.999995	5.0118e-06	1	0.000887466	UpCRBM
ILMN_1670796	EXOSC10	5394	26.341	36.7437	36.546	3.50145e-06	0.999998	1.75073e-06	1	0.000500445	UpCRBM
ILMN_1711189	EXOSC10	5394	22.8835	29.9774	30.7749	0.000260607	0.99987	0.000130304	1	0.00688443	UpCRBM
ILMN_1726354	EXOSC7	23016	10.9447	32.2359	30.686	0.0019708	0.999015	0.000985402	1	0.0254484	UpCRBM
ILMN_1756162	EXOSC8	11340	25.3717	32.845	29.2555	0.000104698	0.999948	5.23488e-05	1	0.00383585	UpCRBM
ILMN_1721713	EXOSC9	5393	8.12746	31.1248	40.6756	0.000480432	0.99976	0.000240216	1	0.010238	UpCRBM
ILMN_1712066	EXPH5	23086	23.3548	22.7574	24.4827	0.00464106	0.997679	0.00232053	1	0.0441572	UpCRBM
ILMN_1761259	EXT2	2132	12.8931	28.0405	30.2359	0.00353432	0.998233	0.00176716	1	0.0372295	UpCRBM
ILMN_1708105	EZH2	2146	18.7303	27.0759	30.6642	0.00127162	0.999364	0.000635811	1	0.0189836	UpCRBM
ILMN_1679158	FAAH2	158584	25.9938	33.0398	34.8436	1.86919e-05	0.999991	9.34594e-06	1	0.00126421	UpCRBM
ILMN_1804948	FABP7	2173	20.8037	23.5586	35.7534	0.000574176	0.999713	0.000287088	1	0.0116218	UpCRBM
ILMN_1723846	FAM119B	25895	20.8401	26.9895	33.3112	0.000454608	0.999773	0.000227304	1	0.0099036	UpCRBM
ILMN_1807807	FAM33A	348235	10.6384	29.8185	30.2728	0.00373571	0.998132	0.00186785	1	0.0384505	UpCRBM
ILMN_1761594	FAM35A	54537	7.94715	29.3097	34.0526	0.00317774	0.998411	0.00158887	1	0.0346587	UpCRBM
ILMN_1808584	FAM36A	116228	21.7382	29.5426	32.3693	0.000253697	0.999873	0.000126849	1	0.00678075	UpCRBM
ILMN_1669555	FAM48A	55578	26.3565	37.4072	35.978	3.39183e-06	0.999998	1.69591e-06	1	0.000497072	UpCRBM
ILMN_1802376	FAM48A	55578	22.2638	27.3885	29.2372	0.000788257	0.999606	0.000394128	1	0.0141931	UpCRBM
ILMN_1763655	FAM50B	26240	8.29023	29.4217	35.0632	0.00236098	0.99882	0.00118049	1	0.0283416	UpCRBM
ILMN_1673899	FAM57A	79850	15.4446	25.7274	39.3053	0.00047918	0.99976	0.00023959	1	0.010238	UpCRBM
ILMN_1727309	FAM82C	55177	8.73017	33.8565	37.5927	0.000460351	0.99977	0.000230175	1	0.00995363	UpCRBM
ILMN_1768717	FANCE	2178	21.0391	32.1964	31.0187	0.000216711	0.999892	0.000108356	1	0.00605482	UpCRBM
ILMN_1768052	FARP2	9855	19.1715	28.3121	27.7486	0.00168148	0.999159	0.000840738	1	0.0226621	UpCRBM
ILMN_1667792	FAT2	2196	26.7611	28.0493	26.5729	0.000480976	0.99976	0.000240488	1	0.010238	UpCRBM
ILMN_1794260	FBXL10	84678	20.3459	30.7036	40.4848	3.15612e-05	0.999984	1.57806e-05	1	0.00177833	UpCRBM
ILMN_1668414	FBXL11	22992	16.2874	25.543	27.6782	0.00516538	0.997417	0.00258269	1	0.0473046	UpCRBM
ILMN_1693438	FBXL12	54850	13.8441	30.5276	34.2446	0.00072398	0.999638	0.00036199	1	0.0134738	UpCRBM
ILMN_1799389	FBXL6	26233	29.4372	34.2072	34.456	5.94667e-06	0.999997	2.97333e-06	1	0.000646671	UpCRBM
ILMN_1714428	FBXO17	115290	28.039	31.4951	34.8752	1.67706e-05	0.999992	8.38528e-06	1	0.00120012	UpCRBM
ILMN_1745887	FBXO21	23014	9.58002	23.6225	38.1216	0.00322216	0.998389	0.00161108	1	0.0349708	UpCRBM
ILMN_1756874	FBXO42	54455	16.3837	30.8137	29.7859	0.00109665	0.999452	0.000548327	1	0.0171325	UpCRBM
ILMN_1799319	FDXR	2232	24.7063	26.765	22.813	0.00225344	0.998873	0.00112672	1	0.0275885	UpCRBM
ILMN_1788232	FGF20	26281	19.7437	24.5668	25.5651	0.005066	0.997467	0.002533	1	0.0468359	UpCRBM
ILMN_1762531	FGF9	2254	26.5943	31.0609	27.5273	0.000191562	0.999904	9.57808e-05	1	0.00554778	UpCRBM
ILMN_1788468	FLJ10154	55082	22.1798	28.6193	30.5499	0.000445241	0.999777	0.00022262	1	0.0098587	UpCRBM
ILMN_1783546	FLJ10769	55739	10.2789	31.8837	36.5734	0.000661417	0.999669	0.000330708	1	0.0126709	UpCRBM
ILMN_1709725	FLJ16165	390928	26.077	29.3175	24.4128	0.000687394	0.999656	0.000343697	1	0.0130525	UpCRBM
ILMN_1767509	FLJ20186	54849	17.2103	26.9007	26.1834	0.0045012	0.997749	0.0022506	1	0.0432304	UpCRBM
ILMN_1680644	FLJ20323	54468	11.5453	25.8645	35.6789	0.00231998	0.99884	0.00115999	1	0.0281295	UpCRBM
ILMN_1685237	FLJ20718	55027	21.5287	25.6502	32.9876	0.000577448	0.999711	0.000288724	1	0.0116456	UpCRBM
ILMN_1805148	FLJ31438	130162	17.0676	29.4413	23.1197	0.00513996	0.99743	0.00256998	1	0.047274	UpCRBM
ILMN_1767260	FLJ32745	165055	17.6665	31.2974	33.9035	0.000284849	0.999858	0.000142424	1	0.00734778	UpCRBM
ILMN_1680782	FLJ36874	219988	27.453	37.6896	39.1814	8.27594e-07	1	4.13797e-07	1	0.00024157	UpCRBM
ILMN_1797342	FNBP1	23048	32.9379	41.231	31.3151	6.61162e-07	1	3.30581e-07	1	0.000236908	UpCRBM
ILMN_1750911	FNBP4	23360	26.6718	33.1207	33.0305	2.55298e-05	0.999987	1.27649e-05	1	0.00158199	UpCRBM
ILMN_1761084	FNDC5	252995	21.4399	25.6074	22.7679	0.00527196	0.997364	0.00263598	1	0.0477808	UpCRBM
ILMN_1731648	FOXJ2	55810	23.6826	30.9517	39.8759	1.47368e-05	0.999993	7.3684e-06	1	0.00110243	UpCRBM
ILMN_1681703	FOXO3A	2309	21.4318	27.895	32.4819	0.00039288	0.999804	0.00019644	1	0.00915509	UpCRBM
ILMN_1769031	FRAP1	2475	8.24659	29.2919	34.4956	0.00275178	0.998624	0.00137589	1	0.031499	UpCRBM
ILMN_1736180	FRAT1	10023	14.8745	30.6794	30.3625	0.00135118	0.999324	0.000675589	1	0.019666	UpCRBM
ILMN_1788213	FRAT2	23401	19.1596	29.7325	29.2685	0.000883206	0.999558	0.000441603	1	0.0152357	UpCRBM
ILMN_1715452	FREM1	158326	26.6878	27.8424	28.2114	0.000347236	0.999826	0.000173618	1	0.00844636	UpCRBM
ILMN_1769234	FRMD6	122786	23.2382	21.8297	28.3551	0.00260986	0.998695	0.00130493	1	0.0304401	UpCRBM
ILMN_1737981	FSTL5	56884	29.1451	27.1349	24.4495	0.00058512	0.999707	0.00029256	1	0.0117309	UpCRBM
ILMN_1727508	FTSJ1	24140	16.4304	32.803	38.6577	7.78877e-05	0.999961	3.89438e-05	1	0.00321164	UpCRBM
ILMN_1704195	FUK	197258	19.4859	26.9196	27.3143	0.00232523	0.998837	0.00116261	1	0.0281295	UpCRBM
ILMN_1712894	FUT1	2523	14.2557	24.1497	33.3142	0.00321018	0.998395	0.00160509	1	0.034875	UpCRBM
ILMN_1792072	FUT4	2526	22.6569	34.4008	34.6376	3.2036e-05	0.999984	1.6018e-05	1	0.0017843	UpCRBM
ILMN_1746341	FZD7	8324	26.465	26.7119	26.0696	0.000783299	0.999608	0.000391649	1	0.0141735	UpCRBM
ILMN_1779742	GABRD	2563	21.3853	26.2644	25.4367	0.00273486	0.998633	0.00136743	1	0.0314679	UpCRBM
ILMN_1735157	GALNT12	79695	22.904	23.9218	23.168	0.00519451	0.997403	0.00259726	1	0.0473439	UpCRBM
ILMN_1738869	GALNT13	114805	30.9156	35.8039	33.3589	3.40583e-06	0.999998	1.70292e-06	1	0.000497072	UpCRBM
ILMN_1671221	GAPVD1	26130	16.7844	38.3266	39.394	1.28255e-05	0.999994	6.41275e-06	1	0.00103087	UpCRBM
ILMN_1779347	GARNL3	84253	23.8158	31.858	35.1465	4.15241e-05	0.999979	2.0762e-05	1	0.00215126	UpCRBM
ILMN_1679476	GART	2618	8.81419	31.4421	31.9567	0.00268669	0.998657	0.00134335	1	0.0310749	UpCRBM
ILMN_1745994	GAS7	8522	12.9879	25.5478	42.3899	0.000411141	0.999794	0.000205571	1	0.00946247	UpCRBM
ILMN_1682206	GCC1	79571	16.3004	31.1728	23.7031	0.00374793	0.998126	0.00187397	1	0.0385283	UpCRBM
ILMN_1680390	GCNT2	2651	23.2122	23.4416	24.9871	0.00376453	0.998118	0.00188227	1	0.0386073	UpCRBM
ILMN_1770206	GEMIN4	50628	14.228	30.4377	32.2849	0.00106242	0.999469	0.000531212	1	0.016847	UpCRBM
ILMN_1744006	GFOD2	81577	21.5395	26.6766	30.8156	0.000752059	0.999624	0.000376029	1	0.0137597	UpCRBM
ILMN_1810716	GFRA3	2676	22.5558	28.0441	27.5404	0.000940175	0.99953	0.000470088	1	0.0155648	UpCRBM
ILMN_1708174	GGA1	26088	22.3306	30.269	29.2748	0.000395306	0.999802	0.000197653	1	0.00917307	UpCRBM
ILMN_1658175	GGA1	26088	17.7411	26.2707	26.8883	0.0040203	0.99799	0.00201015	1	0.0401559	UpCRBM
ILMN_1717317	GGA2	23062	20.5227	29.1784	35.3821	0.000173246	0.999913	8.66228e-05	1	0.0052077	UpCRBM
ILMN_1737036	GGTL3	2686	21.8569	26.5094	29.7784	0.000924868	0.999538	0.000462434	1	0.0154731	UpCRBM
ILMN_1786186	GGTL3	2686	21.1156	24.4145	30.4996	0.00145283	0.999274	0.000726415	1	0.0206072	UpCRBM
ILMN_1754272	GINS3	64785	32.5816	36.5297	33.169	1.79941e-06	0.999999	8.99706e-07	1	0.000376586	UpCRBM
ILMN_1714349	GLCE	26035	31.0558	32.1006	36.9704	3.33562e-06	0.999998	1.66781e-06	1	0.000497072	UpCRBM
ILMN_1754912	GLE1L	2733	18.8169	28.56	32.8315	0.000546754	0.999727	0.000273377	1	0.0112516	UpCRBM
ILMN_1694323	GLE1L	2733	15.4376	27.3433	28.7283	0.00343374	0.998283	0.00171687	1	0.036587	UpCRBM
ILMN_1709771	GLS2	27165	14.6207	31.9273	27.5415	0.00199934	0.999	0.000999671	1	0.0257869	UpCRBM
ILMN_1727043	GLT25D1	79709	17.3103	27.2785	25.7588	0.00446393	0.997768	0.00223196	1	0.0430181	UpCRBM
ILMN_1782829	GLTSCR1	29998	13.7301	26.9666	32.4368	0.00238827	0.998806	0.00119414	1	0.02844	UpCRBM
ILMN_1727761	GMEB1	10691	24.3073	30.6196	31.2918	0.000140699	0.99993	7.03495e-05	1	0.00456674	UpCRBM
ILMN_1664172	GNE	10020	21.3498	32.9326	27.3622	0.000412042	0.999794	0.000206021	1	0.00946247	UpCRBM
ILMN_1699859	GNPAT	8443	7.07423	31.4962	31.0207	0.00444232	0.997779	0.00222116	1	0.0429212	UpCRBM
ILMN_1712631	GOSR1	9527	17.5839	44.492	45.1036	2.53916e-07	1	1.26958e-07	1	0.000201174	UpCRBM
ILMN_1655625	GPATCH1	55094	20.5532	39.0202	43.1324	1.16958e-06	0.999999	5.84789e-07	1	0.00029484	UpCRBM
ILMN_1764617	GPATCH8	23131	20.6647	30.9594	29.699	0.000437352	0.999781	0.000218676	1	0.00977458	UpCRBM
ILMN_1677962	GPHN	10243	14.6375	26.0478	31.6393	0.00286302	0.998568	0.00143151	1	0.0324047	UpCRBM
ILMN_1765419	GPLD1	2822	22.3939	27.2163	28.7926	0.000882164	0.999559	0.000441082	1	0.0152357	UpCRBM
ILMN_1664723	GPR172A	79581	20.1518	28.0861	25.8918	0.00216158	0.998919	0.00108079	1	0.0271057	UpCRBM
ILMN_1805973	GPR19	2842	17.259	26.2601	26.6634	0.00460056	0.9977	0.00230028	1	0.0439151	UpCRBM
ILMN_1724211	GPRC5C	55890	28.4539	28.4619	27.9424	0.000214361	0.999893	0.00010718	1	0.00600427	UpCRBM
ILMN_1734054	GRIN2C	2905	25.8807	27.6541	26.1833	0.000696893	0.999652	0.000348446	1	0.0131866	UpCRBM
ILMN_1692527	GRK4	2868	16.8293	30.3761	28.5725	0.00144015	0.99928	0.000720073	1	0.0205587	UpCRBM
ILMN_1670547	GRM1	2911	22.6792	22.2674	27.533	0.0031428	0.998429	0.0015714	1	0.0345403	UpCRBM
ILMN_1721138	GRPEL2	134266	18.7349	28.4234	28.1889	0.00162837	0.999186	0.000814184	1	0.0222715	UpCRBM
ILMN_1666206	GSDML	55876	19.1605	23.521	27.3621	0.00484924	0.997575	0.00242462	1	0.0456215	UpCRBM
ILMN_1771964	GSTA4	2941	16.8369	29.9703	35.0899	0.000353722	0.999823	0.000176861	1	0.0085853	UpCRBM
ILMN_1691430	GSTCD	79807	21.1753	31.938	30.7358	0.000240085	0.99988	0.000120042	1	0.00651152	UpCRBM
ILMN_1722095	GSTCD	79807	17.9009	27.1832	27.347	0.00296065	0.99852	0.00148032	1	0.033272	UpCRBM
ILMN_1651800	GSTM4	2948	23.8197	31.1434	28.7559	0.00026068	0.99987	0.00013034	1	0.00688443	UpCRBM
ILMN_1664931	GTF2E2	2961	15.1482	29.0175	33.9988	0.000819606	0.99959	0.000409803	1	0.0144804	UpCRBM
ILMN_1746457	GTF3C2	2976	18.3195	35.7531	35.4634	5.26697e-05	0.999974	2.63348e-05	1	0.00255115	UpCRBM
ILMN_1723895	GTF3C5	9328	19.2237	28.259	28.8446	0.00132645	0.999337	0.000663225	1	0.0194874	UpCRBM
ILMN_1669878	GUSB	2990	24.4505	33.8009	30.268	7.82879e-05	0.999961	3.9144e-05	1	0.00321618	UpCRBM
ILMN_1746171	H2AFY	9555	16.6165	28.6608	32.3138	0.000957418	0.999521	0.000478709	1	0.0157562	UpCRBM
ILMN_1705570	H2AFY2	55506	28.153	30.3786	31.3642	5.8313e-05	0.999971	2.91565e-05	1	0.00265791	UpCRBM
ILMN_1695706	H3F3B	3021	30.7671	33.9986	32.7279	7.34453e-06	0.999996	3.67226e-06	1	0.000716195	UpCRBM
ILMN_1718963	HARS2	23438	16.2426	33.3743	31.8011	0.000395006	0.999802	0.000197503	1	0.00917307	UpCRBM
ILMN_1732705	HCFC1	3054	8.39168	27.2674	40.677	0.00109189	0.999454	0.000545946	1	0.0170822	UpCRBM
ILMN_1772455	HDAC3	8841	20.6849	34.6207	38.0796	1.91295e-05	0.99999	9.56477e-06	1	0.00127822	UpCRBM
ILMN_1720440	HEL308	113510	18.8843	32.6275	31.3172	0.000295218	0.999852	0.000147609	1	0.00758	UpCRBM
ILMN_1673820	HLTF	6596	19.6301	30.2582	26.0106	0.00147231	0.999264	0.000736153	1	0.0208301	UpCRBM
ILMN_1700518	HMGN4	10473	14.1972	25.6181	30.1895	0.0045357	0.997732	0.00226785	1	0.0434455	UpCRBM
ILMN_1651262	HNRPAB	3182	15.0011	26.0562	30.6268	0.00328342	0.998358	0.00164171	1	0.0354217	UpCRBM
ILMN_1751368	HNRPD	3184	16.159	28.7855	34.9437	0.000561025	0.999719	0.000280512	1	0.0114602	UpCRBM
ILMN_1691776	HNRPDL	9987	26.4484	32.4217	33.2667	3.06881e-05	0.999985	1.5344e-05	1	0.0017546	UpCRBM
ILMN_1745385	HNRPM	4670	27.5755	38.9122	39.2852	5.19875e-07	1	2.59938e-07	1	0.000220762	UpCRBM
ILMN_1718571	HNRPU	3192	24.1669	28.8006	28.8744	0.000411351	0.999794	0.000205675	1	0.00946247	UpCRBM
ILMN_1725973	HOM-TES-103	25900	9.88443	31.799	30.4157	0.00280137	0.998599	0.00140068	1	0.0318695	UpCRBM
ILMN_1764850	HPCAL1	3241	19.5862	22.9247	32.1952	0.00187742	0.999061	0.00093871	1	0.0245567	UpCRBM
ILMN_1721994	HPS4	89781	16.5899	28.6364	29.2541	0.00189123	0.999054	0.000945615	1	0.0246504	UpCRBM
ILMN_1796150	HS3ST1	9957	26.1192	28.3048	29.7887	0.000240102	0.99988	0.000120051	1	0.00651152	UpCRBM
ILMN_1768495	HSF2	3298	12.8784	27.6747	37.7768	0.000755416	0.999622	0.000377708	1	0.0137814	UpCRBM
ILMN_1797318	HSPA14	51182	14.9535	28.2254	31.9172	0.00161017	0.999195	0.000805086	1	0.0222039	UpCRBM
ILMN_1671046	HSPB2	3316	24.0144	25.938	24.6858	0.00206414	0.998968	0.00103207	1	0.0263166	UpCRBM
ILMN_1652223	HSPC049	29062	17.1325	28.7532	28.2658	0.0020473	0.998976	0.00102365	1	0.026162	UpCRBM
ILMN_1663484	HYPK	25764	17.3096	25.5484	27.946	0.00406526	0.997967	0.00203263	1	0.0404328	UpCRBM
ILMN_1766366	ICA1L	130026	14.724	23.9735	32.7297	0.00343168	0.998284	0.00171584	1	0.036587	UpCRBM
ILMN_1706154	ICK	22858	18.669	26.3413	29.1567	0.00208533	0.998957	0.00104267	1	0.0264247	UpCRBM
ILMN_1734508	ICT1	3396	16.9868	34.2574	35.568	0.000104784	0.999948	5.2392e-05	1	0.00383585	UpCRBM
ILMN_1696654	IFIT5	24138	18.5102	28.8821	29.189	0.00124026	0.99938	0.000620128	1	0.018632	UpCRBM
ILMN_1666194	IFRD2	7866	24.7458	40.6554	35.5935	2.23505e-06	0.999999	1.11752e-06	1	0.000399226	UpCRBM
ILMN_1753890	IFT20	90410	21.4687	32.4865	31.215	0.000173946	0.999913	8.69732e-05	1	0.00521463	UpCRBM
ILMN_1717165	IGBP1	3476	13.2757	27.8209	28.1338	0.00522309	0.997388	0.00261154	1	0.0474873	UpCRBM
ILMN_1699362	IK	3550	16.7109	36.8641	37.2271	3.61546e-05	0.999982	1.80773e-05	1	0.00194673	UpCRBM
ILMN_1809890	IKBKAP	8518	10.3468	26.9157	31.8156	0.00513349	0.997433	0.00256674	1	0.0472537	UpCRBM
ILMN_1727142	IKBKB	3551	20.9503	25.7173	24.1063	0.00433409	0.997833	0.00216705	1	0.0424305	UpCRBM
ILMN_1707308	IKBKG	8517	13.7319	32.0097	31.8552	0.000913644	0.999543	0.000456822	1	0.0154249	UpCRBM
ILMN_1788107	IL11	3589	18.8015	25.5295	25.1546	0.00539486	0.997303	0.00269743	1	0.0486107	UpCRBM
ILMN_1720024	IL11RA	3590	19.7132	28.8803	29.1935	0.000968851	0.999516	0.000484426	1	0.0158576	UpCRBM
ILMN_1813572	IL16	3603	31.0901	31.5002	29.3765	3.55377e-05	0.999982	1.77689e-05	1	0.00192285	UpCRBM
ILMN_1680805	IL28RA	163702	19.8044	27.7287	27.7056	0.00169567	0.999152	0.000847837	1	0.0227705	UpCRBM
ILMN_1789018	ILF3	3609	15.1428	27.3659	27.8547	0.00430083	0.99785	0.00215042	1	0.0423666	UpCRBM
ILMN_1724666	INADL	10207	27.7547	26.6399	26.9633	0.00049162	0.999754	0.00024581	1	0.010367	UpCRBM
ILMN_1773312	INADL	10207	25.4387	26.5196	26.4909	0.000920933	0.99954	0.000460467	1	0.0154731	UpCRBM
ILMN_1747318	INADL	10207	26.1353	26.0037	25.7931	0.0010462	0.999477	0.000523102	1	0.0166731	UpCRBM
ILMN_1678362	INOC1	54617	30.8788	43.5624	45.84	3.33168e-09	1	1.66584e-09	1	1.84775e-05	UpCRBM
ILMN_1799387	INOC1	54617	13.6891	31.3157	34.5963	0.000575772	0.999712	0.000287886	1	0.0116329	UpCRBM
ILMN_1735224	INPP5A	3632	22.8784	25.0267	28.6358	0.00134133	0.999329	0.000670667	1	0.0195764	UpCRBM
ILMN_1810116	INPP5B	3633	19.0769	35.1252	33.7528	8.13765e-05	0.999959	4.06883e-05	1	0.00329426	UpCRBM
ILMN_1797668	INSM1	3642	26.4559	27.9236	27.9471	0.000382023	0.999809	0.000191011	1	0.00895855	UpCRBM
ILMN_1679483	INTS10	55174	17.7493	34.4955	34.5137	0.000107992	0.999946	5.39959e-05	1	0.00392736	UpCRBM
ILMN_1686553	INTS2	57508	13.9002	27.8277	27.9116	0.00486888	0.997566	0.00243444	1	0.0457494	UpCRBM
ILMN_1660844	INTS4	92105	26.3518	33.205	30.1937	5.87079e-05	0.999971	2.93539e-05	1	0.00265791	UpCRBM
ILMN_1723117	IPO9	55705	12.1675	24.0887	34.3474	0.00388889	0.998056	0.00194444	1	0.0392856	UpCRBM
ILMN_1701244	ITFG2	55846	24.1709	33.655	32.1241	5.31689e-05	0.999973	2.65844e-05	1	0.00256413	UpCRBM
ILMN_1755727	JARID1B	10765	11.4018	24.3846	35.8042	0.00314755	0.998426	0.00157377	1	0.0345403	UpCRBM
ILMN_1764177	JARID2	3720	30.6298	33.1276	32.6389	1.00812e-05	0.999995	5.0406e-06	1	0.000887466	UpCRBM
ILMN_1706539	JMJD1B	51780	16.941	35.9737	43.528	7.26886e-06	0.999996	3.63443e-06	1	0.000716195	UpCRBM
ILMN_1764970	JMJD1C	221037	26.0379	27.2592	29.1208	0.000370281	0.999815	0.00018514	1	0.0087854	UpCRBM
ILMN_1661770	JMJD2C	23081	24.2909	29.0155	27.4414	0.000534211	0.999733	0.000267105	1	0.0111381	UpCRBM
ILMN_1668586	KCND1	3750	25.9486	29.7066	29.9362	0.00017017	0.999915	8.50852e-05	1	0.00517131	UpCRBM
ILMN_1726679	KCNJ11	3767	15.414	28.1918	30.3285	0.0020803	0.99896	0.00104015	1	0.0264247	UpCRBM
ILMN_1731044	KCTD14	65987	24.7806	26.4317	26.1608	0.00115753	0.999421	0.000578767	1	0.0178077	UpCRBM
ILMN_1652040	KCTD2	23510	22.5966	24.3843	25.1903	0.00335407	0.998323	0.00167704	1	0.0360847	UpCRBM
ILMN_1762990	KIAA0141	9812	22.2886	29.0813	28.8156	0.000586968	0.999707	0.000293484	1	0.0117309	UpCRBM
ILMN_1812973	KIAA0179	23076	13.8282	28.2656	29.3771	0.00337686	0.998312	0.00168843	1	0.0362245	UpCRBM
ILMN_1807767	KIAA0182	23199	21.4673	28.3483	29.1427	0.000766211	0.999617	0.000383106	1	0.013915	UpCRBM
ILMN_1696127	KIAA0240	23506	24.0679	32.4765	33.2132	5.57172e-05	0.999972	2.78586e-05	1	0.00261871	UpCRBM
ILMN_1786779	KIAA0247	9766	25.9448	26.9325	31.0291	0.000257304	0.999871	0.000128652	1	0.00682778	UpCRBM
ILMN_1725880	KIAA0286	23306	13.784	28.5673	33.0386	0.00148153	0.999259	0.000740766	1	0.0209073	UpCRBM
ILMN_1809585	KIAA0319L	79932	14.1683	28.9658	28.9993	0.0029698	0.998515	0.0014849	1	0.0333101	UpCRBM
ILMN_1654392	KIAA0323	23351	22.5589	27.4758	28.0116	0.000959307	0.99952	0.000479654	1	0.0157639	UpCRBM
ILMN_1659845	KIAA0355	9710	35.6003	40.28	34.1455	1.55552e-07	1	7.7776e-08	1	0.000155978	UpCRBM
ILMN_1810628	KIAA0367	23273	19.7918	32.2477	26.7038	0.000786398	0.999607	0.000393199	1	0.0141931	UpCRBM
ILMN_1795911	KIAA0372	9652	17.3736	29.0875	28.7253	0.0016488	0.999176	0.000824398	1	0.0223527	UpCRBM
ILMN_1657156	KIAA0495	57212	19.8461	33.4147	25.3384	0.00081525	0.999592	0.000407625	1	0.0144804	UpCRBM
ILMN_1774330	KIAA0523	23302	29.292	33.666	25.563	8.65831e-05	0.999957	4.32916e-05	1	0.00341583	UpCRBM
ILMN_1682572	KIAA0528	9847	19.47	25.847	30.1795	0.00158937	0.999205	0.000794685	1	0.0221196	UpCRBM
ILMN_1651684	KIAA0586	9786	13.1449	29.7276	26.8609	0.0047384	0.997631	0.0023692	1	0.0448889	UpCRBM
ILMN_1797822	KIAA0746	23231	31.1023	29.2481	32.5773	2.71156e-05	0.999986	1.35578e-05	1	0.00165256	UpCRBM
ILMN_1813230	KIAA0789	9671	20.9877	23.7562	25.1125	0.00517763	0.997411	0.00258882	1	0.0473067	UpCRBM
ILMN_1778033	KIAA0802	23255	28.8688	28.7878	28.1436	0.000170872	0.999915	8.54361e-05	1	0.00517609	UpCRBM
ILMN_1678808	KIAA0831	22863	15.0237	28.8938	26.4024	0.00434093	0.99783	0.00217047	1	0.04246	UpCRBM
ILMN_1685631	KIAA0892	23383	25.0087	34.8095	30.3483	5.12003e-05	0.999974	2.56002e-05	1	0.00250182	UpCRBM
ILMN_1670752	KIAA0907	22889	25.2435	30.8134	31.8474	9.29129e-05	0.999954	4.64564e-05	1	0.00350541	UpCRBM
ILMN_1669433	KIAA0913	23053	16.6782	29.2991	28.9531	0.00172219	0.999139	0.000861096	1	0.0230151	UpCRBM
ILMN_1692394	KIAA1024	23251	30.9564	30.6085	25.7148	0.000122832	0.999939	6.14158e-05	1	0.00420166	UpCRBM
ILMN_1678235	KIAA1267	284058	21.1848	25.5602	25.5769	0.00318543	0.998407	0.00159271	1	0.034708	UpCRBM
ILMN_1700733	KIAA1370	56204	20.8722	24.4345	24.5689	0.00515469	0.997423	0.00257734	1	0.0472918	UpCRBM
ILMN_1813635	KIAA1429	25962	19.9207	30.7438	30.1884	0.000481812	0.999759	0.000240906	1	0.010238	UpCRBM
ILMN_1801178	KIAA1456	57604	17.06	25.0621	29.3431	0.00354276	0.998229	0.00177138	1	0.0372672	UpCRBM
ILMN_1715032	KIAA1542	57661	20.6457	34.6158	40.4973	9.6604e-06	0.999995	4.8302e-06	1	0.000864139	UpCRBM
ILMN_1788347	KIAA1737	85457	19.4563	29.8403	27.6946	0.00115389	0.999423	0.000576946	1	0.0177763	UpCRBM
ILMN_1665049	KIAA1840	80208	16.0076	31.3255	24.0606	0.00357131	0.998214	0.00178565	1	0.0373715	UpCRBM
ILMN_1673207	KLF11	8462	26.462	33.0455	32.3376	3.33182e-05	0.999983	1.66591e-05	1	0.00182322	UpCRBM
ILMN_1679929	KLF13	51621	21.701	34.8493	32.8488	5.86201e-05	0.999971	2.93101e-05	1	0.00265791	UpCRBM
ILMN_1756525	KLHL20	27252	16.6312	27.1399	25.8669	0.00507679	0.997462	0.00253839	1	0.0468483	UpCRBM
ILMN_1770641	KLHL3	26249	36.5313	38.389	41.4809	1.66062e-08	1	8.30309e-09	1	3.46203e-05	UpCRBM
ILMN_1716093	KRT10	3858	18.7434	27.2981	27.2969	0.00248881	0.998756	0.0012444	1	0.0292126	UpCRBM
ILMN_1773567	LAMA5	3911	28.8485	30.3486	30.0301	7.07035e-05	0.999965	3.53517e-05	1	0.00300606	UpCRBM
ILMN_1689817	LCOR	84458	21.9754	25.1383	25.569	0.00299502	0.998502	0.00149751	1	0.0335225	UpCRBM
ILMN_1730534	LDLRAD3	143458	25.8973	26.7116	21.3687	0.00245094	0.998775	0.00122547	1	0.0288597	UpCRBM
ILMN_1809040	LDLRAP1	26119	23.5104	25.7234	21.1339	0.00488857	0.997556	0.00244428	1	0.0458321	UpCRBM
ILMN_1680860	LEMD2	221496	21.3738	28.8724	27.5717	0.000991167	0.999504	0.000495583	1	0.016043	UpCRBM
ILMN_1731185	LEPREL2	10536	24.0429	24.4003	25.4645	0.00240167	0.998799	0.00120084	1	0.0284832	UpCRBM
ILMN_1696627	LHFP	10186	23.3246	25.1095	25.9254	0.00216086	0.99892	0.00108043	1	0.0271057	UpCRBM
ILMN_1704369	LIMA1	51474	25.527	26.7362	25.724	0.00102365	0.999488	0.000511823	1	0.0163925	UpCRBM
ILMN_1702124	LNX2	222484	20.6457	25.201	33.7529	0.000647403	0.999676	0.000323701	1	0.0125104	UpCRBM
ILMN_1651296	LOC143666	143666	19.9725	34.7834	39.4036	1.51073e-05	0.999992	7.55363e-06	1	0.00110243	UpCRBM
ILMN_1796113	LOC144233	144233	22.8526	34.0664	33.4789	4.58389e-05	0.999977	2.29195e-05	1	0.00229029	UpCRBM
ILMN_1797579	LOC158318	158318	16.999	27.3736	29.4451	0.00218667	0.998907	0.00109334	1	0.0271733	UpCRBM
ILMN_1770400	LOC201181	201181	23.6437	26.7185	26.1371	0.0013761	0.999312	0.000688048	1	0.0199005	UpCRBM
ILMN_1783023	LOC285636	285636	16.0452	32.5317	26.1064	0.00180676	0.999097	0.000903378	1	0.0238862	UpCRBM
ILMN_1687921	LOC339123	339123	11.2732	30.1314	30.2339	0.00314101	0.998429	0.00157051	1	0.0345403	UpCRBM
ILMN_1679771	LOC388969	388969	24.9712	30.5276	28.0389	0.000278371	0.999861	0.000139185	1	0.00722246	UpCRBM
ILMN_1719237	LOC389517	389517	15.4758	27.5763	30.1203	0.00244144	0.998779	0.00122072	1	0.0287884	UpCRBM
ILMN_1725528	LOC400657	400657	18.2822	29.3438	28.6067	0.0013348	0.999333	0.0006674	1	0.0195324	UpCRBM
ILMN_1656082	LOC440926	440926	19.4972	30.0398	27.6293	0.00111113	0.999444	0.000555564	1	0.0172856	UpCRBM
ILMN_1727553	LOC63920	63920	24.8543	29.8079	28.8717	0.000277583	0.999861	0.000138792	1	0.00722246	UpCRBM
ILMN_1708510	LOC651850	651850	14.2645	26.8488	29.1479	0.00432465	0.997838	0.00216233	1	0.0424262	UpCRBM
ILMN_1683692	LRCH1	23143	26.3984	26.1209	26.1423	0.000892453	0.999554	0.000446226	1	0.0152922	UpCRBM
ILMN_1757336	LRCH3	84859	19.2074	25.7882	25.6163	0.00435441	0.997823	0.00217721	1	0.0424795	UpCRBM
ILMN_1678998	LRRC14	9684	16.7452	28.8538	26.6199	0.00304319	0.998478	0.00152159	1	0.0338566	UpCRBM
ILMN_1743280	LRRC37B	114659	29.5148	35.6493	41.5658	3.95465e-07	1	1.97732e-07	1	0.000220762	UpCRBM
ILMN_1654628	LSM14A	26065	29.0391	34.8494	36.651	2.81746e-06	0.999999	1.40873e-06	1	0.000452469	UpCRBM
ILMN_1690342	LTA4H	4048	31.695	38.3119	45.7288	1.83923e-08	1	9.19617e-09	1	3.46203e-05	UpCRBM
ILMN_1805658	LTV1	84946	7.99965	32.3278	33.1336	0.00204384	0.998978	0.00102192	1	0.0261479	UpCRBM
ILMN_1765371	LUC7L	55692	14.4636	26.8453	32.5331	0.00208266	0.998959	0.00104133	1	0.0264247	UpCRBM
ILMN_1781155	LYN	4067	22.0391	25.3451	30.8902	0.000899152	0.99955	0.000449576	1	0.0153216	UpCRBM
ILMN_1799951	LYST	1130	26.4523	31.6786	35.3828	2.0861e-05	0.99999	1.04305e-05	1	0.00135316	UpCRBM
ILMN_1740759	MAMDC4	158056	23.7423	25.9236	24.6899	0.00218092	0.99891	0.00109046	1	0.0271733	UpCRBM
ILMN_1803060	MAML1	9794	20.159	28.1392	31.5429	0.000610159	0.999695	0.00030508	1	0.012064	UpCRBM
ILMN_1815148	MAN2A2	4122	23.8969	34.1501	27.8173	0.000153829	0.999923	7.69143e-05	1	0.00478462	UpCRBM
ILMN_1800733	MANBA	4126	20.0333	30.6108	25.5513	0.00139073	0.999305	0.000695367	1	0.0200338	UpCRBM
ILMN_1797189	MAP3K12	7786	22.7796	27.6336	29.5132	0.000627299	0.999686	0.00031365	1	0.0122716	UpCRBM
ILMN_1690398	MAP3K3	4215	17.2029	26.5373	29.0588	0.00271022	0.998645	0.00135511	1	0.0313143	UpCRBM
ILMN_1678087	MAP3K4	4216	18.498	27.9616	38.203	0.000184426	0.999908	9.22131e-05	1	0.00542614	UpCRBM
ILMN_1704795	MARK3	4140	25.6351	32.6815	33.7784	3.05124e-05	0.999985	1.52562e-05	1	0.00175359	UpCRBM
ILMN_1708764	MBD4	8930	15.9752	27.0315	30.3561	0.0023635	0.998818	0.00118175	1	0.0283416	UpCRBM
ILMN_1805225	MBOAT5	10162	24.7267	28.833	31.5232	0.000188338	0.999906	9.41688e-05	1	0.00549201	UpCRBM
ILMN_1651719	MBTPS1	8720	20.3411	29.5267	36.6581	0.000119663	0.99994	5.98315e-05	1	0.00416082	UpCRBM
ILMN_1760174	MCCC1	56922	4.1049	28.7014	37.8427	0.00341154	0.998294	0.00170577	1	0.0364555	UpCRBM
ILMN_1681503	MCM2	4171	23.5606	32.5905	25.265	0.000453351	0.999773	0.000226675	1	0.00989875	UpCRBM
ILMN_1806818	MCM3	4172	19.8704	32.8955	29.8825	0.000314597	0.999843	0.000157299	1	0.00791273	UpCRBM
ILMN_1784766	MCM3AP	8888	20.8698	36.859	45.9497	8.58472e-07	1	4.29236e-07	1	0.000244158	UpCRBM
ILMN_1814122	MDC1	9656	27.0707	39.4289	35.6136	1.66459e-06	0.999999	8.32295e-07	1	0.000362032	UpCRBM
ILMN_1682091	MECP2	4204	19.0292	29.3416	28.9439	0.00106471	0.999468	0.000532356	1	0.016847	UpCRBM
ILMN_1787179	MEGF11	84465	32.1502	33.9987	32.3663	5.60172e-06	0.999997	2.80086e-06	1	0.000635835	UpCRBM
ILMN_1705685	MEIS1	4211	41.1399	42.8597	33.3857	1.34224e-08	1	6.7112e-09	1	3.46203e-05	UpCRBM
ILMN_1781565	MESDC1	59274	20.0281	27.1324	29.3332	0.00129438	0.999353	0.00064719	1	0.0192199	UpCRBM
ILMN_1782257	METT11D1	64745	29.5853	38.2922	38.2006	4.94883e-07	1	2.47442e-07	1	0.000220762	UpCRBM
ILMN_1738342	METT5D1	196074	7.78456	28.3453	32.7165	0.00517314	0.997413	0.00258657	1	0.0473046	UpCRBM
ILMN_1655635	METTL3	56339	22.1443	27.5398	25.8855	0.00164323	0.999178	0.000821616	1	0.0223527	UpCRBM
ILMN_1796106	MGAT4B	11282	15.7471	24.1367	32.3692	0.00294906	0.998525	0.00147453	1	0.0332428	UpCRBM
ILMN_1656420	MGC3020	79014	25.4592	26.1395	27.6578	0.000766503	0.999617	0.000383252	1	0.013915	UpCRBM
ILMN_1732089	MGC3207	84245	24.0337	30.4952	28.1855	0.0003339	0.999833	0.00016695	1	0.00825044	UpCRBM
ILMN_1759991	MGC3731	79159	25.4483	40.07	38.4401	8.89975e-07	1	4.44988e-07	1	0.00024679	UpCRBM
ILMN_1777745	MGC40405	257415	15.8137	25.897	30.033	0.00328606	0.998357	0.00164303	1	0.0354217	UpCRBM
ILMN_1779442	MGC40499	245812	21.2765	34.6093	36.1037	2.86598e-05	0.999986	1.43299e-05	1	0.00168674	UpCRBM
ILMN_1785141	MICAL2	9645	18.9768	26.1434	32.1353	0.00107149	0.999464	0.000535745	1	0.0169061	UpCRBM
ILMN_1761858	MID1	4281	24.0631	24.3864	29.1794	0.00107565	0.999462	0.000537827	1	0.0169477	UpCRBM
ILMN_1682232	MIER1	57708	15.798	26.9546	34.8436	0.000939353	0.99953	0.000469676	1	0.0155648	UpCRBM
ILMN_1672357	MIZF	25988	25.6634	38.2547	40.302	8.18539e-07	1	4.0927e-07	1	0.00024157	UpCRBM
ILMN_1742578	MKLN1	4289	14.9035	36.3985	23.8595	0.00160973	0.999195	0.000804864	1	0.0222039	UpCRBM
ILMN_1671583	MKRN1	23608	25.3906	42.9483	40.4216	1.82809e-07	1	9.14045e-08	1	0.000155978	UpCRBM
ILMN_1663727	MKRN2	23609	10.398	31.46	33.0493	0.00155964	0.99922	0.000779818	1	0.0217877	UpCRBM
ILMN_1788363	MLH1	4292	19.2511	30.5597	26.5267	0.00132972	0.999335	0.000664858	1	0.0194907	UpCRBM
ILMN_1783606	MLL5	55904	16.6956	25.979	27.4181	0.0046392	0.99768	0.0023196	1	0.0441572	UpCRBM
ILMN_1743538	MLLT10	8028	23.1403	31.0317	32.1268	0.000134737	0.999933	6.73684e-05	1	0.00439559	UpCRBM
ILMN_1770119	MLLT10	8028	16.9767	25.684	27.5557	0.00454522	0.997727	0.00227261	1	0.0434992	UpCRBM
ILMN_1712452	MPHOSPH1	9585	20.4397	24.595	28.869	0.00226397	0.998868	0.00113198	1	0.0276868	UpCRBM
ILMN_1654421	MPHOSPH9	10198	14.8634	28.799	31.4243	0.00161259	0.999194	0.000806297	1	0.0222039	UpCRBM
ILMN_1724754	MPP3	4356	29.0273	28.4336	24.8391	0.000404199	0.999798	0.000202099	1	0.00934036	UpCRBM
ILMN_1705579	MPP4	58538	20.6592	27.6264	32.907	0.000448098	0.999776	0.000224049	1	0.0098617	UpCRBM
ILMN_1657502	MRGPRF	219928	25.4256	22.3001	23.866	0.00393126	0.998034	0.00196563	1	0.0395336	UpCRBM
ILMN_1777756	MRPL39	54148	16.4051	25.9855	28.3893	0.00402935	0.997985	0.00201468	1	0.0401559	UpCRBM
ILMN_1652147	MRPL43	84545	19.1884	24.6582	25.6417	0.00541692	0.997292	0.00270846	1	0.0487312	UpCRBM
ILMN_1760441	MRPS5	64969	16.2015	28.8459	28.7235	0.00218456	0.998908	0.00109228	1	0.0271733	UpCRBM
ILMN_1680675	MRRF	92399	23.4772	34.9346	36.2077	1.4351e-05	0.999993	7.17552e-06	1	0.00109781	UpCRBM
ILMN_1701306	MRRF	92399	16.0751	35.145	34.2193	0.000146569	0.999927	7.32844e-05	1	0.00463174	UpCRBM
ILMN_1731853	MSRA	4482	24.2934	34.7868	35.6344	1.42228e-05	0.999993	7.11142e-06	1	0.00109555	UpCRBM
ILMN_1676159	MST4	51765	21.4738	28.3086	34.4233	0.000219457	0.99989	0.000109728	1	0.00610079	UpCRBM
ILMN_1660222	MTBP	27085	19.432	24.7285	26.0319	0.00473899	0.997631	0.0023695	1	0.0448889	UpCRBM
ILMN_1772521	MTHFD1L	25902	26.2944	31.4771	33.4592	3.91478e-05	0.99998	1.95739e-05	1	0.00207764	UpCRBM
ILMN_1778734	MTMR10	54893	21.0941	37.0645	29.7755	8.57144e-05	0.999957	4.28572e-05	1	0.00339551	UpCRBM
ILMN_1739641	MTMR3	8897	18.6562	29.9117	22.4119	0.00403936	0.99798	0.00201968	1	0.0402196	UpCRBM
ILMN_1676980	MTSS1	9788	23.0643	25.1435	22.601	0.00444613	0.997777	0.00222306	1	0.0429212	UpCRBM
ILMN_1780937	MUS81	80198	18.702	37.8598	39.2217	9.23862e-06	0.999995	4.61931e-06	1	0.000846899	UpCRBM
ILMN_1714438	MUTYH	4595	28.03	32.6419	31.2959	3.33089e-05	0.999983	1.66544e-05	1	0.00182322	UpCRBM
ILMN_1701957	MXD1	4084	17.5402	25.3839	29.8279	0.00274645	0.998627	0.00137323	1	0.031499	UpCRBM
ILMN_1756541	MXD4	10608	22.138	25.5609	27.0361	0.00195765	0.999021	0.000978824	1	0.0253375	UpCRBM
ILMN_1738523	MYD88	4615	23.8433	30.358	39.4191	1.90277e-05	0.99999	9.51385e-06	1	0.00127822	UpCRBM
ILMN_1808789	MYO5C	55930	26.2304	26.1367	26.0547	0.000939255	0.99953	0.000469627	1	0.0155648	UpCRBM
ILMN_1804679	MYST1	84148	11.379	26.8704	32.9048	0.0034529	0.998274	0.00172645	1	0.0366855	UpCRBM
ILMN_1698441	MYST4	23522	15.949	28.4505	35.1768	0.000600558	0.9997	0.000300279	1	0.011938	UpCRBM
ILMN_1749838	MZF1	7593	20.783	34.1871	32.1739	0.000103984	0.999948	5.19921e-05	1	0.00383187	UpCRBM
ILMN_1655961	NAG8	27099	22.097	25.1484	28.8886	0.00144656	0.999277	0.000723282	1	0.0205606	UpCRBM
ILMN_1669142	NARG1	80155	18.8081	29.025	31.1542	0.000726026	0.999637	0.000363013	1	0.0134892	UpCRBM
ILMN_1725840	NASP	4678	22.7378	34.0309	24.1656	0.000501578	0.999749	0.000250789	1	0.0105569	UpCRBM
ILMN_1683441	NCAPD3	23310	10.3714	31.7169	32.7524	0.00158226	0.999209	0.000791128	1	0.0220482	UpCRBM
ILMN_1770035	NCOA5	57727	21.8651	29.5191	32.1058	0.000264517	0.999868	0.000132259	1	0.00695614	UpCRBM
ILMN_1695797	NCOA6	23054	22.9092	34.1504	38.0535	1.2266e-05	0.999994	6.13301e-06	1	0.0010004	UpCRBM
ILMN_1812622	NEIL1	79661	17.1437	26.8923	29.4099	0.00236795	0.998816	0.00118398	1	0.0283643	UpCRBM
ILMN_1669425	NEUROD1	4760	27.827	26.2972	25.4997	0.000736054	0.999632	0.000368027	1	0.0136261	UpCRBM
ILMN_1726387	NF1	4763	19.8842	28.1448	30.6431	0.000794374	0.999603	0.000397187	1	0.0142576	UpCRBM
ILMN_1685810	NFATC3	4775	23.5327	29.4662	29.5469	0.000343731	0.999828	0.000171865	1	0.00837948	UpCRBM
ILMN_1800976	NFATC3	4775	16.3259	29.9146	25.0668	0.00364416	0.998178	0.00182208	1	0.037812	UpCRBM
ILMN_1758049	NFIA	4774	27.6647	29.8349	32.2995	5.91486e-05	0.99997	2.95743e-05	1	0.00265937	UpCRBM
ILMN_1778991	NFIB	4781	20.1958	24.8606	33.3589	0.000841662	0.999579	0.000420831	1	0.0146788	UpCRBM
ILMN_1714965	NFKB1	4790	30.5796	29.0714	35.7148	1.34382e-05	0.999993	6.71911e-06	1	0.0010497	UpCRBM
ILMN_1717313	NFKBIE	4794	14.4435	25.4788	33.3719	0.00233083	0.998835	0.00116541	1	0.0281323	UpCRBM
ILMN_1804610	NFX1	4799	12.0914	26.486	32.9971	0.00320498	0.998398	0.00160249	1	0.0348526	UpCRBM
ILMN_1682197	NFXL1	152518	16.9141	26.6977	31.7962	0.00155262	0.999224	0.000776308	1	0.0217445	UpCRBM
ILMN_1810488	NFYC	4802	15.7209	30.8286	36.3526	0.000271673	0.999864	0.000135836	1	0.00710706	UpCRBM
ILMN_1770537	NGFRAP1	27018	20.6103	28.0103	28.8716	0.00104996	0.999475	0.000524981	1	0.0166923	UpCRBM
ILMN_1728779	NGLY1	55768	21.1295	31.9693	32.3556	0.000160637	0.99992	8.03183e-05	1	0.00494519	UpCRBM
ILMN_1726392	NIN	51199	14.7554	26.2517	35.0416	0.00129926	0.99935	0.000649632	1	0.0192409	UpCRBM
ILMN_1690136	NIPBL	25836	11.2459	27.2855	32.5074	0.00352935	0.998235	0.00176468	1	0.0372125	UpCRBM
ILMN_1721621	NKTR	4820	33.2588	35.3238	33.5254	1.92535e-06	0.999999	9.62676e-07	1	0.00038242	UpCRBM
ILMN_1669456	NME3	4832	19.6664	27.1924	29.9528	0.00119927	0.9994	0.000599635	1	0.0181804	UpCRBM
ILMN_1688971	NOL11	25926	26.2154	36.9038	38.4143	1.94102e-06	0.999999	9.70508e-07	1	0.00038242	UpCRBM
ILMN_1689747	NOL8	55035	12.072	30.8392	31.605	0.0017444	0.999128	0.000872201	1	0.0232001	UpCRBM
ILMN_1740976	NONO	4841	18.8863	30.529	31.4248	0.000473754	0.999763	0.000236877	1	0.0101642	UpCRBM
ILMN_1748476	NOP5/NOP58	51602	16.1025	24.4542	30.4242	0.00384205	0.998079	0.00192102	1	0.0389899	UpCRBM
ILMN_1772165	NPAT	4863	19.3236	30.3734	31.425	0.000446716	0.999777	0.000223358	1	0.0098587	UpCRBM
ILMN_1808898	NPR2	4882	22.093	26.8026	25.363	0.00216854	0.998916	0.00108427	1	0.0271178	UpCRBM
ILMN_1734867	NR2C1	7181	25.1217	29.3195	31.349	0.000159037	0.99992	7.95185e-05	1	0.00492748	UpCRBM
ILMN_1774382	NR2C1	7181	22.5072	29.707	29.2441	0.00043748	0.999781	0.00021874	1	0.00977458	UpCRBM
ILMN_1762085	NR3C1	2908	12.3514	29.9617	34.3205	0.0011018	0.999449	0.000550901	1	0.0171887	UpCRBM
ILMN_1718629	NRIP1	8204	16.5122	25.4519	29.1004	0.00380934	0.998095	0.00190467	1	0.0389091	UpCRBM
ILMN_1720935	NRXN3	9369	23.7129	25.9256	28.3545	0.000988236	0.999506	0.000494118	1	0.016043	UpCRBM
ILMN_1707175	NSD1	64324	20.9989	26.5332	26.7282	0.0021272	0.998936	0.0010636	1	0.0268429	UpCRBM
ILMN_1716596	NSMAF	8439	21.3373	31.0308	38.4379	3.9424e-05	0.99998	1.9712e-05	1	0.00208234	UpCRBM
ILMN_1680129	NSUN2	54888	17.0451	31.1558	33.8997	0.000338946	0.999831	0.000169473	1	0.0083375	UpCRBM
ILMN_1688070	NSUN5C	260294	20.1385	27.2068	29.0334	0.00133019	0.999335	0.000665096	1	0.0194907	UpCRBM
ILMN_1789793	NUAK2	81788	17.3426	26.1404	29.0786	0.0028509	0.998575	0.00142545	1	0.0323336	UpCRBM
ILMN_1689342	NUBP1	4682	14.8599	32.3356	31.5705	0.000715129	0.999642	0.000357564	1	0.013399	UpCRBM
ILMN_1705114	NUMB	8650	11.9046	30.2032	41.3139	0.000221459	0.999889	0.00011073	1	0.00614107	UpCRBM
ILMN_1815924	NUP107	57122	27.0586	31.1413	30.3128	8.23539e-05	0.999959	4.1177e-05	1	0.00330967	UpCRBM
ILMN_1751338	NUP133	55746	15.3469	34.1305	39.5441	5.65367e-05	0.999972	2.82684e-05	1	0.00262387	UpCRBM
ILMN_1652989	NUP160	23279	24.5311	28.1104	27.719	0.000586375	0.999707	0.000293187	1	0.0117309	UpCRBM
ILMN_1673962	NUP205	23165	26.9842	37.3879	33.7159	5.67505e-06	0.999997	2.83753e-06	1	0.000635835	UpCRBM
ILMN_1784467	NUP210	23225	24.1959	32.4747	30.5516	0.000108932	0.999946	5.44662e-05	1	0.00393576	UpCRBM
ILMN_1738681	NUP62	23636	22.8293	37.1836	36.9792	7.12033e-06	0.999996	3.56017e-06	1	0.000716195	UpCRBM
ILMN_1669635	NUP85	79902	28.5534	31.3753	33.0493	2.53911e-05	0.999987	1.26956e-05	1	0.00158199	UpCRBM
ILMN_1734826	NUP88	4927	19.0478	29.8491	36.2221	0.000166912	0.999917	8.34561e-05	1	0.00510025	UpCRBM
ILMN_1789616	NUPL2	11097	15.2381	26.9858	30.0192	0.00294491	0.998528	0.00147246	1	0.0332299	UpCRBM
ILMN_1712636	NVL	4931	22.0532	40.5749	36.2056	4.06028e-06	0.999998	2.03014e-06	1	0.000529843	UpCRBM
ILMN_1705783	NXF1	10482	17.2701	24.8238	28.4904	0.00423934	0.99788	0.00211967	1	0.0419098	UpCRBM
ILMN_1730698	ODF2	4957	25.0318	32.5773	30.5516	8.68432e-05	0.999957	4.34216e-05	1	0.00341583	UpCRBM
ILMN_1697639	OGT	8473	18.1176	24.1407	32.2097	0.0019306	0.999035	0.000965298	1	0.0250458	UpCRBM
ILMN_1698406	ORMDL1	94101	11.534	31.0204	32.3935	0.00157532	0.999212	0.000787658	1	0.0219791	UpCRBM
ILMN_1656482	OSBPL2	9885	28.2535	41.3537	28.6278	5.65365e-06	0.999997	2.82683e-06	1	0.000635835	UpCRBM
ILMN_1811489	OXSR1	9943	19.9732	31.7627	31.1486	0.000296965	0.999852	0.000148483	1	0.00760725	UpCRBM
ILMN_1813846	P2RX4	5025	22.5821	24.4905	24.5318	0.00376074	0.99812	0.00188037	1	0.0386073	UpCRBM
ILMN_1702396	PACSIN2	11252	29.1541	38.4642	15.7485	0.000319846	0.99984	0.000159923	1	0.00800841	UpCRBM
ILMN_1723793	PALB2	79728	11.8291	30.2583	36.5026	0.000701611	0.999649	0.000350806	1	0.0132352	UpCRBM
ILMN_1681304	PAN3	255967	30.7303	33.6792	32.7745	8.03385e-06	0.999996	4.01692e-06	1	0.000755182	UpCRBM
ILMN_1743910	PANK4	55229	12.0515	27.5342	36.528	0.00122428	0.999388	0.000612141	1	0.0184257	UpCRBM
ILMN_1798354	PAPOLA	10914	20.4839	25.831	26.8424	0.0026532	0.998673	0.0013266	1	0.0308483	UpCRBM
ILMN_1812080	PARP16	54956	15.336	26.4573	28.3994	0.0044556	0.997772	0.0022278	1	0.0429752	UpCRBM
ILMN_1775885	PARP2	10038	7.06326	30.5098	38.1049	0.00124135	0.999379	0.000620676	1	0.018632	UpCRBM
ILMN_1789905	PAX6	5080	21.8888	23.7399	26.9493	0.00304835	0.998476	0.00152417	1	0.03388	UpCRBM
ILMN_1680193	PAXIP1	22976	28.9778	29.2919	29.2563	0.000110377	0.999945	5.51885e-05	1	0.00397294	UpCRBM
ILMN_1714384	PCCA	5095	26.1545	40.6002	39.1033	4.89349e-07	1	2.44674e-07	1	0.000220762	UpCRBM
ILMN_1675428	PCDHGC3	5098	17.7578	25.5695	27.7362	0.00388751	0.998056	0.00194376	1	0.0392856	UpCRBM
ILMN_1798602	PCF11	51585	23.7265	28.4627	27.5507	0.000667547	0.999666	0.000333774	1	0.0127663	UpCRBM
ILMN_1747419	PCGF2	7703	26.4105	31.8669	34.0885	2.87408e-05	0.999986	1.43704e-05	1	0.00168674	UpCRBM
ILMN_1788024	PCID2	55795	21.2589	31.813	35.2296	7.72003e-05	0.999961	3.86001e-05	1	0.00319517	UpCRBM
ILMN_1690487	PCM1	5108	17.1841	25.9682	26.4254	0.00517137	0.997414	0.00258568	1	0.0473046	UpCRBM
ILMN_1745470	PDE3B	5140	21.6476	23.898	26.2209	0.00358209	0.998209	0.00179105	1	0.0374482	UpCRBM
ILMN_1705397	PDK2	5164	17.8081	23.2367	30.6634	0.00340319	0.998298	0.00170159	1	0.036433	UpCRBM
ILMN_1736856	PDPR	55066	14.2822	28.3664	29.8248	0.00277128	0.998614	0.00138564	1	0.0316245	UpCRBM
ILMN_1731720	PDRG1	81572	20.6141	37.8905	34.7552	1.99418e-05	0.99999	9.97088e-06	1	0.00131663	UpCRBM
ILMN_1703324	PDSS1	23590	23.7747	30.5807	32.6288	0.000114371	0.999943	5.71853e-05	1	0.00405303	UpCRBM
ILMN_1708341	PDZK1	5174	24.4926	23.9491	24.1715	0.00315893	0.998421	0.00157947	1	0.0345892	UpCRBM
ILMN_1780132	PELI2	57161	30.5716	31.0191	31.277	2.73608e-05	0.999986	1.36804e-05	1	0.00165549	UpCRBM
ILMN_1732519	PER3	8863	21.1815	25.0421	23.4766	0.00536468	0.997318	0.00268234	1	0.0484175	UpCRBM
ILMN_1778160	PFAS	5198	7.06513	29.6479	36.3293	0.00218768	0.998906	0.00109384	1	0.0271733	UpCRBM
ILMN_1791949	PGBD1	84547	15.957	29.7772	35.1654	0.000441341	0.999779	0.000220671	1	0.00983003	UpCRBM
ILMN_1736548	PHACTR4	65979	25.6736	34.6569	28.7227	6.98978e-05	0.999965	3.49489e-05	1	0.00299346	UpCRBM
ILMN_1696087	PHB2	11331	8.164	26.5419	34.8962	0.00447284	0.997764	0.00223642	1	0.0430667	UpCRBM
ILMN_1796710	PHC1	1911	16.8926	26.478	30.5217	0.00214533	0.998927	0.00107266	1	0.0270102	UpCRBM
ILMN_1808047	PHC2	1912	16.9952	32.8401	25.41	0.0016284	0.999186	0.0008142	1	0.0222715	UpCRBM
ILMN_1736015	PHF17	79960	22.7517	30.9429	24.4372	0.000950436	0.999525	0.000475218	1	0.0156879	UpCRBM
ILMN_1699496	PHF21A	51317	16.308	36.0357	31.656	0.000211879	0.999894	0.000105939	1	0.00598005	UpCRBM
ILMN_1788689	PHIP	55023	27.454	29.4641	34.0649	4.27547e-05	0.999979	2.13774e-05	1	0.00216906	UpCRBM
ILMN_1803464	PHTF1	10745	24.5116	28.8517	31.0235	0.000223055	0.999888	0.000111528	1	0.0061699	UpCRBM
ILMN_1780598	PIAS1	8554	15.2959	23.56	32.8451	0.00327403	0.998363	0.00163701	1	0.0353952	UpCRBM
ILMN_1675497	PIAS3	10401	21.8239	32.4043	32.325	0.00012325	0.999938	6.16248e-05	1	0.00420166	UpCRBM
ILMN_1777644	PIB5PA	27124	25.3954	28.9657	28.3825	0.000339318	0.99983	0.000169659	1	0.0083375	UpCRBM
ILMN_1769751	PIGG	54872	11.1901	28.8222	30.0201	0.00432471	0.997838	0.00216236	1	0.0424262	UpCRBM
ILMN_1691291	PIGS	94005	9.50225	29.4911	30.8066	0.0044143	0.997793	0.00220715	1	0.0427628	UpCRBM
ILMN_1729915	PILRA	29992	23.0537	26.1069	28.6901	0.00100866	0.999496	0.000504331	1	0.0161911	UpCRBM
ILMN_1759401	PISD	23761	31.1976	31.6491	31.778	1.69522e-05	0.999992	8.47611e-06	1	0.00120535	UpCRBM
ILMN_1769606	PIWIL4	143689	13.1368	26.5634	32.7595	0.00271871	0.998641	0.00135936	1	0.0313471	UpCRBM
ILMN_1768268	PKIB	5570	27.6411	26.7085	25.8629	0.000641083	0.999679	0.000320542	1	0.012452	UpCRBM
ILMN_1745365	PKNOX1	5316	29.3983	33.6873	35.1269	5.73819e-06	0.999997	2.8691e-06	1	0.00063648	UpCRBM
ILMN_1697629	PLA2G4B	8681	28.7243	30.0546	29.41	9.25898e-05	0.999954	4.62949e-05	1	0.00350541	UpCRBM
ILMN_1704424	PLA2R1	22925	15.1093	25.1216	29.4493	0.00490055	0.99755	0.00245027	1	0.0458321	UpCRBM
ILMN_1786601	PLAGL2	5326	15.2855	29.6761	32.8781	0.000885503	0.999557	0.000442752	1	0.0152516	UpCRBM
ILMN_1737025	PLCL2	23228	15.9931	27.8612	28.2185	0.00309199	0.998454	0.001546	1	0.0342621	UpCRBM
ILMN_1699049	PMS2L3	5387	11.567	31.6835	31.3547	0.00169919	0.99915	0.000849595	1	0.0227901	UpCRBM
ILMN_1767894	POLB	5423	32.236	31.4641	35.8719	4.05753e-06	0.999998	2.02876e-06	1	0.000529843	UpCRBM
ILMN_1688000	POLDIP3	84271	23.1207	41.4647	36.5892	2.03415e-06	0.999999	1.01707e-06	1	0.00038242	UpCRBM
ILMN_1785198	POLE3	54107	19.7724	29.1916	33.0034	0.000367356	0.999816	0.000183678	1	0.00878171	UpCRBM
ILMN_1716973	POLM	27434	20.1863	29.5467	28.4677	0.000891274	0.999554	0.000445637	1	0.0152922	UpCRBM
ILMN_1767422	POLR1D	51082	25.5356	26.9421	30.7366	0.000302323	0.999849	0.000151161	1	0.00765608	UpCRBM
ILMN_1689445	POLR2H	5437	16.3229	29.4269	35.4016	0.000418293	0.999791	0.000209147	1	0.00958618	UpCRBM
ILMN_1742133	POLR3E	55718	14.4955	26.1881	29.9471	0.0040282	0.997986	0.0020141	1	0.0401559	UpCRBM
ILMN_1756793	POLS	11044	21.5145	29.8352	37.4116	6.84342e-05	0.999966	3.42171e-05	1	0.00295359	UpCRBM
ILMN_1768273	POP1	10940	15.5891	30.059	32.6324	0.000806236	0.999597	0.000403118	1	0.0144006	UpCRBM
ILMN_1660282	POPDC2	64091	15.0162	25.1656	31.2283	0.00346679	0.998267	0.0017334	1	0.0367626	UpCRBM
ILMN_1802628	PPAPDC2	403313	21.6891	32.5485	29.746	0.000234898	0.999883	0.000117449	1	0.0064191	UpCRBM
ILMN_1721729	PPARBP	5469	16.5155	25.8272	28.8208	0.00373689	0.998132	0.00186845	1	0.0384505	UpCRBM
ILMN_1800164	PPFIA1	8500	20.575	32.0439	37.1917	5.09158e-05	0.999975	2.54579e-05	1	0.00249893	UpCRBM
ILMN_1659948	PPFIA1	8500	21.9091	30.6044	31.9012	0.000211163	0.999894	0.000105581	1	0.00597504	UpCRBM
ILMN_1715616	PPIL5	122769	14.2959	24.4026	32.6034	0.00349818	0.998251	0.00174909	1	0.03706	UpCRBM
ILMN_1670875	PPM1D	8493	21.7108	23.9592	24.7742	0.00466806	0.997666	0.00233403	1	0.0443305	UpCRBM
ILMN_1701855	PPP1CC	5501	18.5585	27.7249	31.2744	0.000996973	0.999502	0.000498487	1	0.01605	UpCRBM
ILMN_1690546	PPP3CC	5533	15.9908	34.821	39.3768	4.18926e-05	0.999979	2.09463e-05	1	0.00215126	UpCRBM
ILMN_1750364	PPP4C	5531	18.5217	32.615	33.0775	0.000208397	0.999896	0.000104199	1	0.00591577	UpCRBM
ILMN_1724544	PPP4R1	9989	24.4018	32.1331	31.548	8.73849e-05	0.999956	4.36925e-05	1	0.00342499	UpCRBM
ILMN_1750664	PPT2	9374	21.1743	32.3764	35.2466	6.76751e-05	0.999966	3.38376e-05	1	0.00293224	UpCRBM
ILMN_1728934	PRC1	9055	15.5301	30.008	27.829	0.00235615	0.998822	0.00117808	1	0.0283147	UpCRBM
ILMN_1694502	PRIM1	5557	22.2273	30.1857	30.8512	0.000281919	0.999859	0.000140959	1	0.00728914	UpCRBM
ILMN_1786021	PRKAB2	5565	25.3864	35.4809	34.5905	1.1793e-05	0.999994	5.89648e-06	1	0.000976176	UpCRBM
ILMN_1804490	PRKRIP1	79706	23.2824	33.8139	32.6176	5.55994e-05	0.999972	2.77997e-05	1	0.00261871	UpCRBM
ILMN_1715392	PRPF3	9129	23.8151	33.5977	34.5742	3.02633e-05	0.999985	1.51317e-05	1	0.00174991	UpCRBM
ILMN_1656274	PRPF38A	84950	14.5932	27.3891	31.5031	0.00225231	0.998874	0.00112616	1	0.0275885	UpCRBM
ILMN_1799299	PRPF38B	55119	22.5566	24.875	25.7017	0.0027546	0.998623	0.0013773	1	0.031499	UpCRBM
ILMN_1697440	PRPF4	9128	6.91031	33.6268	33.8776	0.00164003	0.99918	0.000820016	1	0.0223527	UpCRBM
ILMN_1760281	PRPF4B	8899	28.6699	32.5087	31.3504	2.89199e-05	0.999986	1.446e-05	1	0.00168831	UpCRBM
ILMN_1812445	PRPSAP2	5636	24.8127	32.6164	25.567	0.000317981	0.999841	0.000158991	1	0.00797975	UpCRBM
ILMN_1745329	PRR14	78994	27.0158	38.5243	39.9041	5.69972e-07	1	2.84986e-07	1	0.000220762	UpCRBM
ILMN_1674924	PRR17	284739	19.5806	24.2966	26.7196	0.00438245	0.997809	0.00219123	1	0.0426031	UpCRBM
ILMN_1728914	PRUNE	58497	14.9823	30.4889	32.1603	0.000924483	0.999538	0.000462241	1	0.0154731	UpCRBM
ILMN_1760542	PSMA1	5682	20.9668	27.5061	30.5703	0.000743456	0.999628	0.000371728	1	0.0136984	UpCRBM
ILMN_1720926	PSMD5	5711	15.4917	26.5059	30.7321	0.00267264	0.998664	0.00133632	1	0.0309961	UpCRBM
ILMN_1671696	PSMF1	9491	13.4213	25.859	29.6529	0.0055287	0.997236	0.00276435	1	0.0494951	UpCRBM
ILMN_1800331	PTCH1	5727	23.8258	28.7403	30.149	0.000331335	0.999834	0.000165668	1	0.00825044	UpCRBM
ILMN_1717393	PTCHD1	139411	28.2918	28.2365	27.2707	0.000277302	0.999861	0.000138651	1	0.00722246	UpCRBM
ILMN_1701134	PTEN	5728	20.3099	23.4943	26.1588	0.00501556	0.997492	0.00250778	1	0.0465545	UpCRBM
ILMN_1792341	PTPRA	5786	9.14448	28.7252	31.2981	0.00496523	0.997517	0.00248262	1	0.0461259	UpCRBM
ILMN_1679051	PTPRR	5801	21.7466	22.1513	30.186	0.00221858	0.998891	0.00110929	1	0.0273955	UpCRBM
ILMN_1722345	PUM2	23369	14.1635	27.0152	34.6036	0.00136516	0.999317	0.000682581	1	0.0198199	UpCRBM
ILMN_1744635	PUNC	9543	21.9423	26.0084	24.154	0.00337313	0.998313	0.00168656	1	0.0362195	UpCRBM
ILMN_1750079	PURB	5814	25.4379	32.8355	39.8222	5.39524e-06	0.999997	2.69762e-06	1	0.000635835	UpCRBM
ILMN_1789384	QSCN6L1	169714	36.7081	39.3139	40.0724	1.87272e-08	1	9.36358e-09	1	3.46203e-05	UpCRBM
ILMN_1670666	RAB12	201475	22.1262	26.1181	27.8214	0.00147155	0.999264	0.000735775	1	0.0208301	UpCRBM
ILMN_1799765	RAB24	53917	21.2501	25.4924	28.6774	0.00166511	0.999167	0.000832555	1	0.0224962	UpCRBM
ILMN_1793269	RAB37	326624	26.3317	30.0716	26.1981	0.000358315	0.999821	0.000179157	1	0.00867106	UpCRBM
ILMN_1796136	RAB37	326624	23.5702	25.6322	22.1823	0.00400026	0.998	0.00200013	1	0.040046	UpCRBM
ILMN_1793332	RAB3GAP2	25782	11.9627	38.258	38.5959	5.60757e-05	0.999972	2.80378e-05	1	0.00262387	UpCRBM
ILMN_1679092	RAB9B	51209	19.4276	24.673	27.5246	0.0035611	0.998219	0.00178055	1	0.0373581	UpCRBM
ILMN_1760884	RABGEF1	27342	9.6144	28.713	34.1648	0.00255718	0.998721	0.00127859	1	0.0299201	UpCRBM
ILMN_1746577	RAE1	8480	8.47458	25.2625	36.5179	0.00393904	0.99803	0.00196952	1	0.0395759	UpCRBM
ILMN_1813489	RAF1	5894	27.3631	34.2584	37.0027	4.83803e-06	0.999998	2.41901e-06	1	0.00060296	UpCRBM
ILMN_1674135	RALGPS1	9649	24.1307	34.4098	35.2769	1.82863e-05	0.999991	9.14315e-06	1	0.00124437	UpCRBM
ILMN_1667306	RANBP10	57610	28.7218	35.2013	34.3604	5.54862e-06	0.999997	2.77431e-06	1	0.000635835	UpCRBM
ILMN_1725992	RAPGEF6	51735	23.7439	28.2726	25.609	0.00107815	0.999461	0.000539077	1	0.016963	UpCRBM
ILMN_1758214	RARS2	57038	20.9042	34.7172	31.8622	9.5551e-05	0.999952	4.77755e-05	1	0.00358058	UpCRBM
ILMN_1681544	RASGEF1C	255426	20.4383	26.3602	24.8255	0.00363062	0.998185	0.00181531	1	0.037812	UpCRBM
ILMN_1734205	RASSF1	11186	19.5891	27.9542	25.5063	0.00268307	0.998658	0.00134153	1	0.0310653	UpCRBM
ILMN_1725719	RAVER1	125950	13.6974	26.5179	29.6161	0.00466371	0.997668	0.00233186	1	0.0443272	UpCRBM
ILMN_1804737	RAVER2	55225	24.281	26.6749	35.1128	0.000144878	0.999928	7.24388e-05	1	0.00462683	UpCRBM
ILMN_1732127	RBKS	64080	15.7654	29.065	24.6486	0.0051829	0.997409	0.00259145	1	0.0473159	UpCRBM
ILMN_1756999	RBL2	5934	18.6691	26.1485	28.4371	0.00252448	0.998738	0.00126224	1	0.0295686	UpCRBM
ILMN_1734286	RBM15B	29890	14.9887	29.5863	25.7169	0.00436763	0.997816	0.00218381	1	0.0424963	UpCRBM
ILMN_1781906	RBM17	84991	16.4143	36.9871	28.4382	0.000360803	0.99982	0.000180401	1	0.00867106	UpCRBM
ILMN_1760256	RBM22	55696	17.6703	32.3746	39.0976	5.72926e-05	0.999971	2.86463e-05	1	0.00264787	UpCRBM
ILMN_1780756	RBM23	55147	19.7267	33.6809	36.1066	5.4347e-05	0.999973	2.71735e-05	1	0.00260792	UpCRBM
ILMN_1747968	RBM33	155435	19.7543	24.6605	26.7703	0.00391088	0.998045	0.00195544	1	0.0394207	UpCRBM
ILMN_1743104	RBM4B	83759	33.7181	40.5711	35.9273	1.38521e-07	1	6.92603e-08	1	0.000155978	UpCRBM
ILMN_1786893	RBM5	10181	23.2441	37.7032	37.807	4.24959e-06	0.999998	2.12479e-06	1	0.000547504	UpCRBM
ILMN_1738239	RBM6	10180	17.2079	25.0553	27.6146	0.00487108	0.997564	0.00243554	1	0.0457494	UpCRBM
ILMN_1720124	RCC2	55920	8.22237	32.4162	28.1703	0.00528132	0.997359	0.00264066	1	0.0478208	UpCRBM
ILMN_1685002	RCE1	9986	22.0272	26.4106	29.5046	0.000970728	0.999515	0.000485364	1	0.0158576	UpCRBM
ILMN_1682095	RCOR3	55758	21.5431	30.0123	29.7043	0.000450562	0.999775	0.000225281	1	0.00987675	UpCRBM
ILMN_1751886	REC8L1	9985	26.7831	32.9695	25.4028	0.000194368	0.999903	9.71842e-05	1	0.00561441	UpCRBM
ILMN_1800642	RELN	5649	33.4613	31.3747	35.0288	3.82337e-06	0.999998	1.91168e-06	1	0.000516142	UpCRBM
ILMN_1748527	REPIN1	29803	17.9379	36.1762	29.3889	0.000247494	0.999876	0.000123747	1	0.00666311	UpCRBM
ILMN_1688326	REPS1	85021	16.4836	25.8166	29.9803	0.00297664	0.998512	0.00148832	1	0.0333504	UpCRBM
ILMN_1707062	REV1	51455	23.3748	26.4846	29.4963	0.000721788	0.999639	0.000360894	1	0.0134556	UpCRBM
ILMN_1784860	RFC3	5983	13.9107	27.7444	31.5653	0.00235554	0.998822	0.00117777	1	0.0283147	UpCRBM
ILMN_1724489	RFC4	5984	24.0841	31.0332	31.7511	0.0001187	0.999941	5.93502e-05	1	0.00415339	UpCRBM
ILMN_1659364	RFC5	5985	11.1101	30.2761	36.5928	0.000796418	0.999602	0.000398209	1	0.0142712	UpCRBM
ILMN_1687107	RFWD3	55159	25.8238	42.0244	36.8643	7.08052e-07	1	3.54026e-07	1	0.000237991	UpCRBM
ILMN_1762803	RFXDC2	64864	25.6996	26.4071	26.8836	0.000818427	0.999591	0.000409213	1	0.0144804	UpCRBM
ILMN_1763704	RGS11	8786	20.5236	24.4277	24.8409	0.00521085	0.997395	0.00260543	1	0.0474538	UpCRBM
ILMN_1663532	RIC8B	55188	14.8696	29.8314	34.7047	0.000614094	0.999693	0.000307047	1	0.0120986	UpCRBM
ILMN_1727171	RICTOR	253260	22.2692	33.0058	24.3728	0.000669655	0.999665	0.000334827	1	0.0127845	UpCRBM
ILMN_1666399	RING1	6015	14.0968	29.1975	28.5503	0.00314824	0.998426	0.00157412	1	0.0345403	UpCRBM
ILMN_1784584	RINT1	60561	12.291	28.9885	28.9255	0.00425365	0.997873	0.00212683	1	0.0420138	UpCRBM
ILMN_1657937	RIPK1	8737	18.8141	31.7563	31.3046	0.000370679	0.999815	0.000185339	1	0.0087854	UpCRBM
ILMN_1689896	RIPK5	25778	10.4301	32.8474	26.7309	0.00432206	0.997839	0.00216103	1	0.0424262	UpCRBM
ILMN_1796673	RIT2	6014	22.6212	27.7811	28.4604	0.000798852	0.999601	0.000399426	1	0.0142917	UpCRBM
ILMN_1801156	RLF	6018	16.4902	27.4398	42.0332	0.000127212	0.999936	6.36061e-05	1	0.00426296	UpCRBM
ILMN_1752677	RNF103	7844	21.9322	29.0841	28.0883	0.000748362	0.999626	0.000374181	1	0.0137597	UpCRBM
ILMN_1777660	RNF144	9781	36.6318	41.019	32.0987	1.76169e-07	1	8.80847e-08	1	0.000155978	UpCRBM
ILMN_1682626	RNF146	81847	15.1043	28.3414	31.2981	0.00174192	0.999129	0.000870959	1	0.0231949	UpCRBM
ILMN_1700606	RNF43	54894	25.2482	31.2339	35.4234	3.17732e-05	0.999984	1.58866e-05	1	0.00177994	UpCRBM
ILMN_1687922	RP9	6100	21.7447	41.3442	42.7143	4.44673e-07	1	2.22337e-07	1	0.000220762	UpCRBM
ILMN_1714809	RPIA	22934	22.5217	35.4147	38.7665	7.66599e-06	0.999996	3.83299e-06	1	0.000733027	UpCRBM
ILMN_1762747	RPL15	6138	14.1852	26.159	29.3442	0.00483076	0.997585	0.00241538	1	0.0455031	UpCRBM
ILMN_1653444	RPL22	6146	20.4015	25.3846	24.8781	0.00438872	0.997806	0.00219436	1	0.0426267	UpCRBM
ILMN_1800796	RPL37	6167	25.7928	33.9022	23.6145	0.000301104	0.999849	0.000150552	1	0.00765608	UpCRBM
ILMN_1657515	RPS6KA5	9252	22.0591	25.9946	24.8734	0.00285642	0.998572	0.00142821	1	0.032363	UpCRBM
ILMN_1761175	RPS6KB2	6199	19.2801	30.9352	32.1228	0.000333975	0.999833	0.000166987	1	0.00825044	UpCRBM
ILMN_1771593	RRM1	6240	21.5294	36.7614	29.5546	8.84688e-05	0.999956	4.42344e-05	1	0.00344315	UpCRBM
ILMN_1809963	RSAD1	55316	20.194	27.0213	31.0616	0.000872011	0.999564	0.000436006	1	0.0150895	UpCRBM
ILMN_1791097	RSBN1	54665	27.3737	32.3481	34.7767	1.61374e-05	0.999992	8.06869e-06	1	0.00116991	UpCRBM
ILMN_1707872	RUFY2	55680	18.8152	28.6635	25.3445	0.00277939	0.99861	0.0013897	1	0.0316845	UpCRBM
ILMN_1812795	RUNX1T1	862	22.4794	24.2357	26.2683	0.00283447	0.998583	0.00141723	1	0.0321801	UpCRBM
ILMN_1708660	RWDD4A	201965	18.2777	26.0804	29.6988	0.00211941	0.99894	0.00105971	1	0.0267751	UpCRBM
ILMN_1663577	S100PBP	64766	27.5375	39.5195	34.3884	2.07586e-06	0.999999	1.03793e-06	1	0.000383757	UpCRBM
ILMN_1658678	SAAL1	113174	19.1741	38.9072	37.416	1.01807e-05	0.999995	5.09034e-06	1	0.000889166	UpCRBM
ILMN_1722059	SAFB	6294	15.1393	29.5974	32.516	0.00100775	0.999496	0.000503874	1	0.0161911	UpCRBM
ILMN_1740842	SALL2	6297	33.4727	38.2543	26.0284	7.32198e-06	0.999996	3.66099e-06	1	0.000716195	UpCRBM
ILMN_1728298	SBK1	388228	23.8392	30.8626	33.6068	8.11746e-05	0.999959	4.05873e-05	1	0.00329426	UpCRBM
ILMN_1745917	SCAND2	54581	16.0829	28.0994	29.1577	0.00238357	0.998808	0.00119178	1	0.0284311	UpCRBM
ILMN_1722742	SCLY	51540	23.3013	37.067	30.3295	4.29593e-05	0.999979	2.14797e-05	1	0.00216906	UpCRBM
ILMN_1814215	SCNN1G	6340	23.0571	24.5397	23.2247	0.00443009	0.997785	0.00221504	1	0.0428783	UpCRBM
ILMN_1756439	SCRN1	9805	14.5809	29.8809	31.3217	0.00138196	0.999309	0.000690981	1	0.0199593	UpCRBM
ILMN_1651949	SCYL3	57147	9.70865	31.3823	29.988	0.00343876	0.998281	0.00171938	1	0.0366053	UpCRBM
ILMN_1803997	SDCCAG3	10807	25.1426	40.657	38.9794	6.78263e-07	1	3.39132e-07	1	0.000236908	UpCRBM
ILMN_1696065	SDF4	51150	20.6176	29.9483	29.6341	0.000568053	0.999716	0.000284026	1	0.0115612	UpCRBM
ILMN_1732575	SEC14L1	6397	11.08	28.3118	29.4113	0.00549012	0.997255	0.00274506	1	0.0493088	UpCRBM
ILMN_1690690	SEC23IP	11196	14.5197	25.4275	30.958	0.00380953	0.998095	0.00190476	1	0.0389091	UpCRBM
ILMN_1735148	SEC24B	10427	17.6046	24.1427	28.0796	0.00494316	0.997528	0.00247158	1	0.045998	UpCRBM
ILMN_1733050	SEC31B	25956	20.6137	26.2401	28.629	0.00162698	0.999187	0.000813489	1	0.0222715	UpCRBM
ILMN_1796572	SEC63D1	374992	19.8483	24.8688	25.1927	0.00504286	0.997479	0.00252143	1	0.0466907	UpCRBM
ILMN_1736481	SECISBP2	79048	17.8751	36.6708	32.8742	9.16013e-05	0.999954	4.58007e-05	1	0.00350541	UpCRBM
ILMN_1696133	SELI	85465	11.649	29.2161	31.5062	0.00271417	0.998643	0.00135708	1	0.0313273	UpCRBM
ILMN_1769787	SELO	83642	20.9596	25.7024	25.5202	0.00326622	0.998367	0.00163311	1	0.0353453	UpCRBM
ILMN_1673369	SEPHS1	22929	20.0189	28.3857	28.15	0.00127985	0.99936	0.000639923	1	0.0190551	UpCRBM
ILMN_1676737	Septin 2	4735	19.3561	24.7973	30.9414	0.00172648	0.999137	0.000863238	1	0.0230446	UpCRBM
ILMN_1769118	Septin 9	10801	16.5327	27.4544	30.4561	0.00190043	0.99905	0.000950217	1	0.0247123	UpCRBM
ILMN_1773968	SERBP1	26135	21.2102	24.6229	33.8421	0.000642133	0.999679	0.000321066	1	0.012452	UpCRBM
ILMN_1769473	SETD2	29072	25.2618	37.128	38.2102	2.53493e-06	0.999999	1.26746e-06	1	0.000432576	UpCRBM
ILMN_1736080	SETDB1	9869	18.1662	26.0136	27.5758	0.00340615	0.998297	0.00170307	1	0.036433	UpCRBM
ILMN_1712560	SF1	7536	17.5713	24.8353	27.4446	0.00492266	0.997539	0.00246133	1	0.0459643	UpCRBM
ILMN_1697286	SF3A1	10291	12.718	27.7508	30.5971	0.0035971	0.998201	0.00179855	1	0.0375697	UpCRBM
ILMN_1813603	SF3B1	23451	20.748	27.4997	27.3207	0.00160453	0.999198	0.000802263	1	0.0222039	UpCRBM
ILMN_1803110	SF3B3	23450	15.2674	25.211	30.6669	0.0036724	0.998164	0.0018362	1	0.0380338	UpCRBM
ILMN_1795341	SFRS1	6426	23.5395	35.2504	35.685	1.4991e-05	0.999993	7.49552e-06	1	0.00110243	UpCRBM
ILMN_1711270	SFRS14	10147	14.6036	31.2667	44.1423	4.23009e-05	0.999979	2.11504e-05	1	0.00216222	UpCRBM
ILMN_1696407	SFRS2	6427	19.4393	32.3773	35.839	8.81566e-05	0.999956	4.40783e-05	1	0.00344307	UpCRBM
ILMN_1697469	SFRS6	6431	18.3754	27.7853	27.7704	0.00218657	0.998907	0.00109328	1	0.0271733	UpCRBM
ILMN_1692575	SFRS8	6433	15.8329	25.9663	28.9985	0.00397852	0.998011	0.00198926	1	0.0398642	UpCRBM
ILMN_1756338	SFXN3	81855	18.0588	25.7497	26.249	0.00477076	0.997615	0.00238538	1	0.0451127	UpCRBM
ILMN_1661491	SH3GL2	6456	15.0317	24.7641	33.5503	0.00232553	0.998837	0.00116276	1	0.0281295	UpCRBM
ILMN_1764723	SH3PXD2B	285590	21.0168	29.7401	23.1784	0.00229139	0.998854	0.00114569	1	0.0278991	UpCRBM
ILMN_1781381	SHF	90525	27.3948	32.4965	31.1945	4.18094e-05	0.999979	2.09047e-05	1	0.00215126	UpCRBM
ILMN_1811933	SHMT1	6470	28.4439	30.7228	31.4119	4.88781e-05	0.999976	2.4439e-05	1	0.00240958	UpCRBM
ILMN_1743784	SHMT1	6470	14.8248	25.7675	28.5571	0.00541702	0.997291	0.00270851	1	0.0487312	UpCRBM
ILMN_1661264	SHMT2	6472	22.5681	29.7019	34.2445	0.000125661	0.999937	6.28305e-05	1	0.00423766	UpCRBM
ILMN_1722423	SHPRH	257218	26.3641	30.1979	33.0249	6.09381e-05	0.99997	3.0469e-05	1	0.00269381	UpCRBM
ILMN_1657868	SIRT4	23409	14.8931	25.7946	30.1969	0.00385049	0.998075	0.00192524	1	0.0390399	UpCRBM
ILMN_1710598	SKI	6497	27.3438	31.3083	33.2434	3.33676e-05	0.999983	1.66838e-05	1	0.00182322	UpCRBM
ILMN_1763412	SKIP	80309	26.1268	28.3666	27.3835	0.000423037	0.999788	0.000211518	1	0.0096049	UpCRBM
ILMN_1665538	SKP2	6502	15.7674	27.8107	27.38	0.00386066	0.99807	0.00193033	1	0.0391073	UpCRBM
ILMN_1679731	SLC15A4	121260	25.7927	44.0267	36.5923	4.0762e-07	1	2.0381e-07	1	0.000220762	UpCRBM
ILMN_1699357	SLC22A5	6584	29.7698	35.508	33.9439	4.29435e-06	0.999998	2.14717e-06	1	0.000547504	UpCRBM
ILMN_1755016	SLC26A10	65012	25.1045	28.677	30.6007	0.000225866	0.999887	0.000112933	1	0.00623209	UpCRBM
ILMN_1732371	SLC26A10	65012	23.2384	25.269	26.1145	0.00204184	0.998979	0.00102092	1	0.0261479	UpCRBM
ILMN_1719627	SLC27A3	11000	20.2897	22.3948	32.448	0.00173267	0.999134	0.000866336	1	0.0230995	UpCRBM
ILMN_1687495	SLC37A1	54020	16.3261	24.1038	33.2777	0.00220011	0.9989	0.00110005	1	0.0272361	UpCRBM
ILMN_1769911	SLC38A1	81539	19.6741	27.523	23.1891	0.00459986	0.9977	0.00229993	1	0.0439151	UpCRBM
ILMN_1812559	SLC7A6	9057	24.5114	29.4786	32.6527	0.000126468	0.999937	6.32339e-05	1	0.00425085	UpCRBM
ILMN_1742224	SLTM	79811	29.3336	38.185	32.109	3.78266e-06	0.999998	1.89133e-06	1	0.000516142	UpCRBM
ILMN_1741477	SMAD4	4089	20.8333	24.4291	27.257	0.00303601	0.998482	0.001518	1	0.0338106	UpCRBM
ILMN_1674551	SMAD5	4090	25.7484	30.3256	28.2175	0.000234735	0.999883	0.000117367	1	0.0064191	UpCRBM
ILMN_1815941	SMAD7	4092	27.6402	37.8797	28.1901	2.05695e-05	0.99999	1.02847e-05	1	0.0013421	UpCRBM
ILMN_1814173	SMARCA4	6597	4.47052	28.1514	36.4278	0.00471872	0.997641	0.00235936	1	0.0447734	UpCRBM
ILMN_1741976	SMARCAD1	56916	21.1148	27.9228	28.4327	0.00106443	0.999468	0.000532214	1	0.016847	UpCRBM
ILMN_1758823	SMARCB1	6598	17.3532	27.2036	28.8491	0.00239753	0.998801	0.00119876	1	0.0284726	UpCRBM
ILMN_1718807	SMC3	9126	20.8789	25.8907	24.5615	0.00387504	0.998062	0.00193752	1	0.0392171	UpCRBM
ILMN_1728556	SMC4	10051	16.826	27.0369	32.8405	0.00116796	0.999416	0.000583978	1	0.0179184	UpCRBM
ILMN_1801383	SMG1	23049	22.3463	24.8982	25.8947	0.00274187	0.998629	0.00137094	1	0.031499	UpCRBM
ILMN_1796349	SMPDL3A	10924	20.5409	26.0721	26.2529	0.0028218	0.998589	0.0014109	1	0.0320691	UpCRBM
ILMN_1807969	SNCAIP	9627	25.9677	22.4529	30.077	0.000912652	0.999544	0.000456326	1	0.0154249	UpCRBM
ILMN_1682038	SNORA25	684959	22.3881	25.7563	23.9077	0.00343248	0.998284	0.00171624	1	0.036587	UpCRBM
ILMN_1794399	SNRK	54861	21.895	27.7673	26.1453	0.00155479	0.999223	0.000777397	1	0.0217475	UpCRBM
ILMN_1732053	SNRP70	6625	21.6716	28.8028	31.3907	0.000390096	0.999805	0.000195048	1	0.00910936	UpCRBM
ILMN_1799103	SNRPB	6628	18.631	27.3031	38.6434	0.000188645	0.999906	9.43227e-05	1	0.00549201	UpCRBM
ILMN_1788163	SNX15	29907	13.8665	25.9954	35.0144	0.00165046	0.999175	0.00082523	1	0.0223527	UpCRBM
ILMN_1784217	SOX15	6665	21.3673	30.5061	30.5342	0.000341593	0.999829	0.000170797	1	0.00835279	UpCRBM
ILMN_1676010	SP1	6667	24.0776	26.9295	26.3911	0.00113792	0.999431	0.00056896	1	0.0176002	UpCRBM
ILMN_1796208	SP2	6668	22.0601	40.3952	34.3036	7.55074e-06	0.999996	3.77537e-06	1	0.000728285	UpCRBM
ILMN_1721081	SP4	6671	22.7067	26.1829	27.3066	0.00144502	0.999277	0.000722509	1	0.0205606	UpCRBM
ILMN_1729179	SPATA5L1	79029	22.2534	28.2286	31.7459	0.000361164	0.999819	0.000180582	1	0.00867106	UpCRBM
ILMN_1779185	SPECC1L	23384	31.1253	41.3238	31.8492	9.2592e-07	1	4.6296e-07	1	0.000250495	UpCRBM
ILMN_1802611	SPEN	23013	22.8702	31.4035	33.5297	9.09114e-05	0.999955	4.54557e-05	1	0.00350135	UpCRBM
ILMN_1801045	SPIN3	169981	23.1069	27.79	29.6568	0.000545532	0.999727	0.000272766	1	0.0112473	UpCRBM
ILMN_1746013	SPOCK1	6695	20.4781	31.1227	34.1674	0.000146147	0.999927	7.30733e-05	1	0.0046316	UpCRBM
ILMN_1656287	SPOCK2	9806	21.8591	35.5348	18.3105	0.00161129	0.999194	0.000805647	1	0.0222039	UpCRBM
ILMN_1682864	SPSB3	90864	25.2579	32.4722	32.8814	4.54047e-05	0.999977	2.27024e-05	1	0.00227887	UpCRBM
ILMN_1663106	SPTB	6710	23.0259	29.4592	24.186	0.00131761	0.999341	0.000658805	1	0.0194348	UpCRBM
ILMN_1728699	SPTY2D1	144108	10.2527	27.4858	32.1989	0.00433257	0.997834	0.00216629	1	0.0424305	UpCRBM
ILMN_1697670	SRRM1	10250	27.4095	33.733	31.358	2.84277e-05	0.999986	1.42138e-05	1	0.00168674	UpCRBM
ILMN_1764460	SRRM2	23524	17.2414	26.6656	27.3623	0.00370628	0.998147	0.00185314	1	0.0383118	UpCRBM
ILMN_1676625	SS18L1	26039	26.9083	31.4361	31.7101	5.45473e-05	0.999973	2.72736e-05	1	0.00260792	UpCRBM
ILMN_1755234	SSH3	54961	30.0427	38.8461	35.8245	7.82578e-07	1	3.91289e-07	1	0.000241121	UpCRBM
ILMN_1689642	SSRP1	6749	12.5948	27.8972	34.3137	0.00164515	0.999177	0.000822577	1	0.0223527	UpCRBM
ILMN_1686988	ST5	6764	17.4505	30.4048	33.0026	0.000459054	0.99977	0.000229527	1	0.00994498	UpCRBM
ILMN_1702175	ST7	7982	23.6158	27.8486	26.6223	0.000969481	0.999515	0.00048474	1	0.0158576	UpCRBM
ILMN_1707763	ST7	7982	20.2011	25.8787	27.0761	0.00264184	0.998679	0.00132092	1	0.0307484	UpCRBM
ILMN_1660738	ST7L	54879	9.40825	28.4806	34.8263	0.00243175	0.998784	0.00121587	1	0.0287252	UpCRBM
ILMN_1735584	ST8SIA5	29906	14.0901	28.8669	38.4009	0.000381149	0.999809	0.000190574	1	0.00895699	UpCRBM
ILMN_1777783	STAT5B	6777	28.9938	35.3658	32.1385	9.472e-06	0.999995	4.736e-06	1	0.000854174	UpCRBM
ILMN_1738449	STIM2	57620	17.482	28.4755	39.5984	0.00014435	0.999928	7.21748e-05	1	0.00462683	UpCRBM
ILMN_1651692	STK10	6793	27.4152	28.3704	28.895	0.000219419	0.99989	0.00010971	1	0.00610079	UpCRBM
ILMN_1751871	STK11	6794	19.7619	25.6705	24.9941	0.00455582	0.997722	0.00227791	1	0.0435631	UpCRBM
ILMN_1653856	STS-1	84959	30.2832	29.7439	18.4909	0.000995058	0.999502	0.000497529	1	0.016043	UpCRBM
ILMN_1753712	STX10	8677	17.6346	31.0507	30.8825	0.000623933	0.999688	0.000311967	1	0.0122273	UpCRBM
ILMN_1659544	STX3	6809	10.5225	26.7172	32.945	0.00413703	0.997931	0.00206851	1	0.0410205	UpCRBM
ILMN_1707804	SULT1A4	445329	19.5794	28.4049	30.9052	0.000752092	0.999624	0.000376046	1	0.0137597	UpCRBM
ILMN_1781516	SUPT16H	11198	20.7025	34.4117	34.0679	6.07514e-05	0.99997	3.03757e-05	1	0.00269381	UpCRBM
ILMN_1801488	SUPT7L	9913	14.5577	30.4175	28.9678	0.00205475	0.998973	0.00102737	1	0.026227	UpCRBM
ILMN_1692026	SUV420H1	51111	20.8746	27.7158	31.7533	0.000549538	0.999725	0.000274769	1	0.0112879	UpCRBM
ILMN_1812208	SUV420H2	84787	28.3854	37.7732	34.5212	2.67527e-06	0.999999	1.33764e-06	1	0.000436384	UpCRBM
ILMN_1797813	SUZ12	23512	24.9546	34.0332	35.2012	1.67493e-05	0.999992	8.37467e-06	1	0.00120012	UpCRBM
ILMN_1754579	SYNE2	23224	23.4592	27.6255	30.2633	0.000455359	0.999772	0.000227679	1	0.0099036	UpCRBM
ILMN_1770857	SYT2	127833	25.5767	29.4424	29.1491	0.000240739	0.99988	0.00012037	1	0.00651288	UpCRBM
ILMN_1754407	TACC2	10579	11.6229	23.0475	36.3795	0.00351771	0.998241	0.00175885	1	0.0371604	UpCRBM
ILMN_1671839	TAF1C	9013	22.8095	35.2992	39.1101	6.62355e-06	0.999997	3.31178e-06	1	0.000699026	UpCRBM
ILMN_1737535	TAF4	6874	25.0411	30.9772	33.3296	6.32562e-05	0.999968	3.16281e-05	1	0.00276235	UpCRBM
ILMN_1684802	TAF5	6877	25.1717	30.2965	34.2108	5.79763e-05	0.999971	2.89882e-05	1	0.00265733	UpCRBM
ILMN_1715069	TANK	10010	14.1801	27.42	28.1432	0.00478843	0.997606	0.00239422	1	0.0452028	UpCRBM
ILMN_1729767	TARBP2	6895	26.5128	31.6617	31.4352	6.09579e-05	0.99997	3.0479e-05	1	0.00269381	UpCRBM
ILMN_1677532	TARDBP	23435	24.0375	26.2806	26.798	0.00120897	0.999396	0.000604484	1	0.0182696	UpCRBM
ILMN_1742869	TBC1D20	128637	21.8041	32.8005	31.9682	0.000122686	0.999939	6.13429e-05	1	0.00420166	UpCRBM
ILMN_1723475	TBC1D22B	55633	7.51199	27.1553	35.9228	0.00363777	0.998181	0.00181888	1	0.037812	UpCRBM
ILMN_1751779	TBC1D2B	23102	16.3375	25.6923	28.3538	0.00435325	0.997823	0.00217662	1	0.0424795	UpCRBM
ILMN_1725183	TBCE	6905	18.8259	41.13	22.7832	0.000306653	0.999847	0.000153326	1	0.00773044	UpCRBM
ILMN_1697117	TBP	6908	18.7177	38.1497	37.6303	1.34298e-05	0.999993	6.71489e-06	1	0.0010497	UpCRBM
ILMN_1706839	TCERG1	10915	16.4739	29.5353	31.8781	0.000894757	0.999553	0.000447378	1	0.0152922	UpCRBM
ILMN_1696640	TCHP	84260	22.5546	36.2037	33.1467	3.02906e-05	0.999985	1.51453e-05	1	0.00174991	UpCRBM
ILMN_1777096	TDG	6996	15.0179	32.0862	34.4921	0.000368786	0.999816	0.000184393	1	0.0087854	UpCRBM
ILMN_1674874	TETRAN	10227	18.7363	27.2431	33.4378	0.000654504	0.999673	0.000327252	1	0.0126122	UpCRBM
ILMN_1653529	TEX10	54881	11.301	29.3402	35.629	0.00117101	0.999414	0.000585505	1	0.0179219	UpCRBM
ILMN_1765574	TFAP2A	7020	24.3404	24.9029	24.0828	0.00272609	0.998637	0.00136304	1	0.0313995	UpCRBM
ILMN_1790595	TFAP2E	339488	22.8497	25.4946	28.8545	0.00116076	0.99942	0.000580378	1	0.0178326	UpCRBM
ILMN_1661717	TFDP1	7027	19.2175	28.1699	28.9546	0.00132185	0.999339	0.000660926	1	0.0194662	UpCRBM
ILMN_1695000	TFIP11	24144	24.6076	28.8855	35.4521	6.94343e-05	0.999965	3.47172e-05	1	0.00298514	UpCRBM
ILMN_1663954	TH1L	51497	24.8044	40.0371	38.0293	1.23948e-06	0.999999	6.1974e-07	1	0.000305518	UpCRBM
ILMN_1763910	TH1L	51497	19.5937	33.1871	31.5211	0.000208535	0.999896	0.000104267	1	0.00591577	UpCRBM
ILMN_1780699	THAP11	57215	7.20117	30.4109	39.7246	0.000858776	0.999571	0.000429388	1	0.0149069	UpCRBM
ILMN_1802157	THOC1	9984	24.5724	37.7722	35.6121	5.57775e-06	0.999997	2.78887e-06	1	0.000635835	UpCRBM
ILMN_1787511	THUMPD2	80745	28.2725	34.7733	35.4281	5.17974e-06	0.999997	2.58987e-06	1	0.000631359	UpCRBM
ILMN_1686454	TIFA	92610	19.0291	24.4313	27.0798	0.00439441	0.997803	0.00219721	1	0.0426446	UpCRBM
ILMN_1735093	TIMELESS	8914	22.5024	31.6682	24.7775	0.000787566	0.999606	0.000393783	1	0.0141931	UpCRBM
ILMN_1776703	TIRAP	114609	16.6323	31.2175	29.2081	0.00108419	0.999458	0.000542093	1	0.0170099	UpCRBM
ILMN_1714283	TLE2	7089	26.2487	29.5323	27.5628	0.000298588	0.999851	0.000149294	1	0.00763118	UpCRBM
ILMN_1802620	TLK2	11011	11.8768	30.4874	31.0084	0.00221568	0.998892	0.00110784	1	0.0273955	UpCRBM
ILMN_1699814	TLL1	7092	24.7897	25.2224	23.2368	0.00279204	0.998604	0.00139602	1	0.031796	UpCRBM
ILMN_1737164	TM9SF1	10548	13.4823	30.142	32.3854	0.00129074	0.999355	0.000645369	1	0.0191915	UpCRBM
ILMN_1654748	TMCO3	55002	21.5672	25.6226	24.6828	0.00351178	0.998244	0.00175589	1	0.0371331	UpCRBM
ILMN_1726683	TMEM109	79073	21.8991	30.8059	35.9562	7.09968e-05	0.999965	3.54984e-05	1	0.00300606	UpCRBM
ILMN_1789112	TMEM145	284339	29.0688	30.2803	30.5612	5.92196e-05	0.99997	2.96098e-05	1	0.00265937	UpCRBM
ILMN_1655876	TMEM159	57146	24.3923	25.1038	26.2196	0.00164779	0.999176	0.000823893	1	0.0223527	UpCRBM
ILMN_1751901	TMEM163	81615	25.0391	27.3971	24.8218	0.00119497	0.999403	0.000597483	1	0.0181569	UpCRBM
ILMN_1678403	TMEM178	130733	28.8443	31.3797	30.8631	4.30215e-05	0.999978	2.15107e-05	1	0.00216906	UpCRBM
ILMN_1658160	TMEM29	29057	22.4522	32.8321	31.3806	0.000121425	0.999939	6.07127e-05	1	0.0041958	UpCRBM
ILMN_1751482	TMEM39A	55254	19.5837	40.7394	34.6028	1.21847e-05	0.999994	6.09236e-06	1	0.0010004	UpCRBM
ILMN_1698605	TMEM43	79188	16.0557	28.3667	34.3128	0.000730557	0.999635	0.000365279	1	0.0135507	UpCRBM
ILMN_1688439	TMEM50B	757	21.3968	26.173	23.8506	0.00383971	0.99808	0.00191986	1	0.0389899	UpCRBM
ILMN_1674985	TMEM51	55092	26.7916	25.8462	27.9315	0.000579946	0.99971	0.000289973	1	0.0116747	UpCRBM
ILMN_1667115	TMEM61	199964	27.6931	34.8723	18.4657	0.000538859	0.999731	0.000269429	1	0.0111483	UpCRBM
ILMN_1745807	TMEM62	80021	19.1074	26.9511	26.2499	0.00309527	0.998452	0.00154764	1	0.0342642	UpCRBM
ILMN_1808634	TMEM77	128338	30.6994	35.4325	34.8269	2.58288e-06	0.999999	1.29144e-06	1	0.00043408	UpCRBM
ILMN_1657864	TMUB2	79089	6.42586	28.1479	42.8431	0.000827989	0.999586	0.000413994	1	0.0145779	UpCRBM
ILMN_1723900	TNFRSF25	8718	23.2741	24.3216	24.9757	0.00312542	0.998437	0.00156271	1	0.0344604	UpCRBM
ILMN_1797445	TNFSF5IP1	56984	15.1441	30.8432	34.8437	0.000442673	0.999779	0.000221337	1	0.00983994	UpCRBM
ILMN_1750718	TNRC15	26058	10.0216	32.4398	28.5292	0.00352478	0.998238	0.00176239	1	0.0371997	UpCRBM
ILMN_1748884	TOB2	10766	21.1373	25.8879	27.4971	0.00201488	0.998993	0.00100744	1	0.0259294	UpCRBM
ILMN_1777663	TOP2B	7155	17.9297	27.8261	32.6192	0.000819842	0.99959	0.000409921	1	0.0144804	UpCRBM
ILMN_1724333	TOR1B	27348	19.0623	28.0115	32.6514	0.000614048	0.999693	0.000307024	1	0.0120986	UpCRBM
ILMN_1667657	TPP2	7174	11.6661	28.9409	29.262	0.00450155	0.997749	0.00225077	1	0.0432304	UpCRBM
ILMN_1730999	TPR	7175	16.4675	35.0707	36.0471	8.48901e-05	0.999958	4.24451e-05	1	0.00339551	UpCRBM
ILMN_1731043	TRA2A	29896	17.6968	24.8656	26.9904	0.00522879	0.997386	0.00261439	1	0.0475002	UpCRBM
ILMN_1755737	TRABD	80305	22.4024	27.3094	25.8792	0.00164224	0.999179	0.00082112	1	0.0223527	UpCRBM
ILMN_1673275	TRAPPC2	6399	19.5549	29.1395	37.1287	0.000140852	0.99993	7.04261e-05	1	0.00456674	UpCRBM
ILMN_1705218	TRAPPC2	6399	14.7994	24.1315	31.1319	0.00451571	0.997742	0.00225785	1	0.0432915	UpCRBM
ILMN_1777526	TRFP	9477	12.3631	28.3209	31.2403	0.00300638	0.998497	0.00150319	1	0.0336157	UpCRBM
ILMN_1674260	TRIM13	10206	19.1385	26.7954	25.5747	0.0036419	0.998179	0.00182095	1	0.037812	UpCRBM
ILMN_1738704	TRIM26	7726	17.8444	26.7699	28.6918	0.00246624	0.998767	0.00123312	1	0.0289784	UpCRBM
ILMN_1810441	TRIM3	10612	23.6417	31.4478	29.4262	0.000213493	0.999893	0.000106746	1	0.00600114	UpCRBM
ILMN_1682316	TRIM33	51592	14.5192	25.3453	31.3606	0.00357139	0.998214	0.00178569	1	0.0373715	UpCRBM
ILMN_1736562	TRIM39	56658	25.3325	38.7104	35.2016	3.86222e-06	0.999998	1.93111e-06	1	0.000516142	UpCRBM
ILMN_1694174	TRIM68	55128	20.5525	35.1359	41.2886	6.74322e-06	0.999997	3.37161e-06	1	0.000699026	UpCRBM
ILMN_1756657	TRIM7	81786	23.3798	29.0086	27.1356	0.00069785	0.999651	0.000348925	1	0.0131866	UpCRBM
ILMN_1763433	TRIM9	114088	27.4211	33.5353	42.4429	1.10026e-06	0.999999	5.50132e-07	1	0.000283817	UpCRBM
ILMN_1661173	TRIP4	9325	13.8356	31.8684	30.0727	0.0013711	0.999314	0.000685552	1	0.0198542	UpCRBM
ILMN_1805481	TRMT11	60487	18.6726	24.4414	26.5476	0.00519364	0.997403	0.00259682	1	0.0473439	UpCRBM
ILMN_1813568	TRPV1	7442	17.1572	26.6928	26.6389	0.00432601	0.997837	0.002163	1	0.0424262	UpCRBM
ILMN_1660368	TRRAP	8295	14.9679	28.7986	31.833	0.00144547	0.999277	0.000722736	1	0.0205606	UpCRBM
ILMN_1732722	TRSPAP1	54952	25.0542	41.4666	37.8944	7.63125e-07	1	3.81563e-07	1	0.000241121	UpCRBM
ILMN_1797367	TSC1	7248	14.9071	26.6547	30.6108	0.00297004	0.998515	0.00148502	1	0.0333101	UpCRBM
ILMN_1707585	TSCOT	57864	17.6701	28.7197	28.2324	0.00186917	0.999065	0.000934584	1	0.0245359	UpCRBM
ILMN_1746393	TSEN2	80746	17.9697	26.7462	31.7045	0.00126786	0.999366	0.000633929	1	0.0189529	UpCRBM
ILMN_1747146	TSG101	7251	5.81349	29.4793	33.7538	0.00483255	0.997584	0.00241628	1	0.0455031	UpCRBM
ILMN_1729453	TSPAN9	10867	34.706	33.8633	33.5635	1.97302e-06	0.999999	9.86512e-07	1	0.00038242	UpCRBM
ILMN_1660810	TTC17	55761	19.0543	24.2403	29.3226	0.00288931	0.998555	0.00144466	1	0.0326357	UpCRBM
ILMN_1696375	TTC31	64427	29.8633	36.8247	38.4119	6.83471e-07	1	3.41736e-07	1	0.000236908	UpCRBM
ILMN_1713129	TTF1	7270	10.746	31.0366	34.0704	0.00127548	0.999362	0.000637738	1	0.0190156	UpCRBM
ILMN_1781374	TUFT1	7286	20.4074	26.9891	27.4141	0.00187535	0.999062	0.000937673	1	0.0245567	UpCRBM
ILMN_1771862	TXNDC11	51061	25.8384	33.6626	37.8317	6.85128e-06	0.999997	3.42564e-06	1	0.000702622	UpCRBM
ILMN_1783753	TXNDC12	51060	9.81819	32.2339	33.659	0.0012975	0.999351	0.00064875	1	0.0192405	UpCRBM
ILMN_1772156	TXNDC4	23071	24.5232	29.4152	32.0305	0.000150196	0.999925	7.5098e-05	1	0.00470614	UpCRBM
ILMN_1657893	TXNRD2	10587	20.2437	29.1986	29.8925	0.0006884	0.999656	0.0003442	1	0.0130525	UpCRBM
ILMN_1768930	U2AF2	11338	17.7187	29.7631	33.6657	0.000430205	0.999785	0.000215103	1	0.00971861	UpCRBM
ILMN_1810474	UBE2I	7329	17.2255	30.6003	40.4278	7.16248e-05	0.999964	3.58124e-05	1	0.00302077	UpCRBM
ILMN_1704342	UBE3C	9690	12.0401	31.3433	30.4005	0.00204002	0.99898	0.00102001	1	0.0261479	UpCRBM
ILMN_1781131	UBN1	29855	13.2267	24.8529	33.0578	0.00355732	0.998221	0.00177866	1	0.0373581	UpCRBM
ILMN_1655434	UCK1	83549	21.9976	30.6585	27.8788	0.000539727	0.99973	0.000269863	1	0.0111483	UpCRBM
ILMN_1800463	UCKL1	54963	24.1136	28.0984	27.8072	0.000629828	0.999685	0.000314914	1	0.0122994	UpCRBM
ILMN_1691444	UHRF2	115426	19.907	24.8164	27.857	0.00295521	0.998522	0.00147761	1	0.033272	UpCRBM
ILMN_1691188	UIMC1	51720	25.4866	36.1641	39.8115	1.94527e-06	0.999999	9.72637e-07	1	0.00038242	UpCRBM
ILMN_1772316	UNC84A	23353	23.5228	29.1085	31.2028	0.000250888	0.999875	0.000125444	1	0.00673814	UpCRBM
ILMN_1705515	UPF3A	65110	27.593	31.7629	27.0042	0.000145438	0.999927	7.2719e-05	1	0.00462683	UpCRBM
ILMN_1798163	UPF3B	65109	28.3036	34.898	37.1483	2.93366e-06	0.999999	1.46683e-06	1	0.000458312	UpCRBM
ILMN_1725862	USP3	9960	26.3296	25.8188	26.5117	0.00089116	0.999554	0.00044558	1	0.0152922	UpCRBM
ILMN_1739454	USP34	9736	13.8747	27.1003	31.0462	0.00301467	0.998493	0.00150733	1	0.0336744	UpCRBM
ILMN_1686319	USP37	57695	22.4631	32.3941	28.8747	0.000253686	0.999873	0.000126843	1	0.00678075	UpCRBM
ILMN_1659523	USP39	10713	4.1979	27.1452	36.8763	0.00551695	0.997242	0.00275848	1	0.0494697	UpCRBM
ILMN_1798712	USP4	7375	9.38485	24.1002	35.7319	0.004899	0.99755	0.0024495	1	0.0458321	UpCRBM
ILMN_1722953	USP47	55031	30.1008	36.7411	36.7996	1.09965e-06	0.999999	5.49823e-07	1	0.000283817	UpCRBM
ILMN_1756873	USP48	84196	16.6237	25.5603	28.7565	0.00391293	0.998044	0.00195646	1	0.0394207	UpCRBM
ILMN_1658373	USP52	9924	26.0991	33.0525	30.3178	6.29236e-05	0.999969	3.14618e-05	1	0.00275869	UpCRBM
ILMN_1778238	UTP6	55813	23.2394	33.7525	38.0397	1.2642e-05	0.999994	6.32101e-06	1	0.00102354	UpCRBM
ILMN_1654488	UTX	7403	17.0699	27.7113	24.938	0.00503577	0.997482	0.00251789	1	0.046664	UpCRBM
ILMN_1715647	VANGL2	57216	23.3326	26.3407	22.1304	0.00366801	0.998166	0.001834	1	0.0380239	UpCRBM
ILMN_1705310	VEZF1	7716	19.5957	32.7304	18.3828	0.00434738	0.997826	0.00217369	1	0.0424795	UpCRBM
ILMN_1802519	VPS36	51028	15.2632	29.1906	30.5482	0.00165487	0.999173	0.000827434	1	0.0223851	UpCRBM
ILMN_1683243	VPS45	11311	17.7201	26.0259	29.2372	0.00262872	0.998686	0.00131436	1	0.0306279	UpCRBM
ILMN_1761086	VPS54	51542	24.6949	30.9292	29.8522	0.000171261	0.999914	8.56305e-05	1	0.00517609	UpCRBM
ILMN_1730740	VSIG8	391123	28.0979	28.026	16.7929	0.00317043	0.998415	0.00158521	1	0.0346467	UpCRBM
ILMN_1736448	VWC2	375567	21.433	24.3971	24.7684	0.00451162	0.997744	0.00225581	1	0.0432897	UpCRBM
ILMN_1771824	WBSCR18	84277	18.7974	23.666	27.1298	0.00526698	0.997367	0.00263349	1	0.0477808	UpCRBM
ILMN_1655117	WDR19	57728	23.2863	32.1935	33.77	6.2724e-05	0.999969	3.1362e-05	1	0.00275869	UpCRBM
ILMN_1707199	WDR20	91833	26.8625	29.1664	21.2978	0.00121936	0.99939	0.000609678	1	0.0183765	UpCRBM
ILMN_1735402	WDR22	8816	13.7384	27.4654	34.5383	0.00136812	0.999316	0.000684061	1	0.0198369	UpCRBM
ILMN_1745852	WDR33	55339	29.1051	31.1162	32.6915	2.61599e-05	0.999987	1.30799e-05	1	0.00161203	UpCRBM
ILMN_1786328	WDR40A	25853	13.7355	32.5538	34.5447	0.00043217	0.999784	0.000216085	1	0.00972339	UpCRBM
ILMN_1728626	WDR5	11091	16.2085	26.8433	29.3676	0.00288492	0.998558	0.00144246	1	0.0326193	UpCRBM
ILMN_1655203	WDR53	348793	9.94318	28.6871	30.7906	0.00478377	0.997608	0.00239189	1	0.0451973	UpCRBM
ILMN_1690206	WDR57	9410	27.7361	38.9897	29.7317	9.39095e-06	0.999995	4.69548e-06	1	0.000853807	UpCRBM
ILMN_1744240	WDR67	93594	24.5922	30.0953	33.3045	8.94461e-05	0.999955	4.4723e-05	1	0.00346901	UpCRBM
ILMN_1702592	WDR73	84942	19.2181	27.1574	26.521	0.0027487	0.998626	0.00137435	1	0.031499	UpCRBM
ILMN_1801869	WDR75	84128	10.5567	28.5818	30.0288	0.00507516	0.997462	0.00253758	1	0.0468483	UpCRBM
ILMN_1711166	WDR8	49856	22.6624	39.7222	39.7385	1.48666e-06	0.999999	7.43328e-07	1	0.000350851	UpCRBM
ILMN_1698185	WDR90	197335	22.2714	28.8098	28.6906	0.000645543	0.999677	0.000322772	1	0.0124963	UpCRBM
ILMN_1697919	WHSC1L1	54904	14.3552	30.1821	35.2719	0.000554092	0.999723	0.000277046	1	0.0113604	UpCRBM
ILMN_1781386	WIPI1	55062	27.3426	35.7469	32.8899	1.06131e-05	0.999995	5.30655e-06	1	0.000919691	UpCRBM
ILMN_1763705	WRNIP1	56897	14.0077	25.154	30.3954	0.00493492	0.997533	0.00246746	1	0.045998	UpCRBM
ILMN_1731175	XKR6	286046	20.0139	26.5801	27.1741	0.00232087	0.99884	0.00116044	1	0.0281295	UpCRBM
ILMN_1669015	XPNPEP1	7511	14.3756	37.2217	46.8687	3.73785e-06	0.999998	1.86892e-06	1	0.000516142	UpCRBM
ILMN_1725121	XPO1	7514	14.8681	25.1995	29.6825	0.00481625	0.997592	0.00240812	1	0.0454267	UpCRBM
ILMN_1657873	XPO4	64328	23.6234	37.8645	36.0758	6.13328e-06	0.999997	3.06664e-06	1	0.000660489	UpCRBM
ILMN_1759495	XPO5	57510	14.2174	31.8885	41.6436	7.70196e-05	0.999961	3.85098e-05	1	0.00319517	UpCRBM
ILMN_1727617	XRN2	22803	18.2054	30.0771	30.0397	0.000837456	0.999581	0.000418728	1	0.0146284	UpCRBM
ILMN_1799815	XYLT2	64132	21.3545	38.5646	33.3657	2.01662e-05	0.99999	1.00831e-05	1	0.00132357	UpCRBM
ILMN_1803939	YIPF6	286451	13.0039	29.9978	28.8108	0.00311726	0.998441	0.00155863	1	0.0344047	UpCRBM
ILMN_1707506	YTHDC1	91746	27.9232	35.5632	31.8333	1.30133e-05	0.999993	6.50667e-06	1	0.00103845	UpCRBM
ILMN_1753885	YTHDF1	54915	14.5661	27.6537	28.455	0.00400721	0.997996	0.00200361	1	0.0400794	UpCRBM
ILMN_1782129	ZBED4	9889	24.7826	36.7479	36.9775	4.73876e-06	0.999998	2.36938e-06	1	0.000597299	UpCRBM
ILMN_1664424	ZBED5	58486	19.5215	27.8691	30.6864	0.000902769	0.999549	0.000451384	1	0.0153346	UpCRBM
ILMN_1689456	ZBTB20	26137	24.0602	29.1991	25.6235	0.000818452	0.999591	0.000409226	1	0.0144804	UpCRBM
ILMN_1731113	ZBTB43	23099	15.3237	26.1247	32.0862	0.00225157	0.998874	0.00112578	1	0.0275885	UpCRBM
ILMN_1710092	ZBTB46	140685	22.097	24.8981	29.6142	0.00130313	0.999348	0.000651565	1	0.0192467	UpCRBM
ILMN_1757262	ZBTB5	9925	14.1034	29.0622	28.3567	0.00336128	0.998319	0.00168064	1	0.0361273	UpCRBM
ILMN_1693227	ZC3H7A	29066	22.1537	34.0101	34.6479	4.03414e-05	0.99998	2.01707e-05	1	0.00212069	UpCRBM
ILMN_1787922	ZC3HC1	51530	9.15095	30.4124	31.8158	0.0032008	0.9984	0.0016004	1	0.0348412	UpCRBM
ILMN_1655137	ZCCHC11	23318	26.8877	31.8351	32.4084	4.07804e-05	0.99998	2.03902e-05	1	0.00213366	UpCRBM
ILMN_1743456	ZCCHC14	23174	23.9786	28.8984	32.3323	0.000179772	0.99991	8.98862e-05	1	0.00533164	UpCRBM
ILMN_1786852	ZCCHC3	85364	20.1374	30.7476	27.9221	0.000777704	0.999611	0.000388852	1	0.0140952	UpCRBM
ILMN_1723007	ZCCHC9	84240	14.1234	27.5943	33.2918	0.00161545	0.999192	0.000807725	1	0.0222039	UpCRBM
ILMN_1730568	ZDHHC7	55625	10.4542	30.7282	31.7185	0.00238966	0.998805	0.00119483	1	0.02844	UpCRBM
ILMN_1772522	ZFP161	7541	19.4056	29.6418	25.2052	0.00208562	0.998957	0.00104281	1	0.0264247	UpCRBM
ILMN_1723886	ZFP2	80108	19.253	30.3604	29.6961	0.000681457	0.999659	0.000340729	1	0.0129849	UpCRBM
ILMN_1782079	ZFP3	124961	20.7899	33.0246	31.0964	0.000183352	0.999908	9.1676e-05	1	0.00540888	UpCRBM
ILMN_1793578	ZFP37	7539	20.7966	29.7873	26.419	0.00117836	0.999411	0.00058918	1	0.0179785	UpCRBM
ILMN_1798061	ZFYVE26	23503	31.1798	39.6909	39.0135	1.44472e-07	1	7.22359e-08	1	0.000155978	UpCRBM
ILMN_1774387	ZHX3	23051	16.1033	33.832	29.5747	0.000618035	0.999691	0.000309017	1	0.0121332	UpCRBM
ILMN_1696339	ZIC2	7546	34.0274	33.0891	33.0801	3.51917e-06	0.999998	1.75959e-06	1	0.000500445	UpCRBM
ILMN_1793885	ZIC3	7547	27.6184	32.8441	34.7694	1.31671e-05	0.999993	6.58355e-06	1	0.00104321	UpCRBM
ILMN_1751544	ZIC4	84107	38.0059	35.097	33.8774	4.54675e-07	1	2.27337e-07	1	0.000220762	UpCRBM
ILMN_1719646	ZIK1	284307	17.6854	27.3443	28.8921	0.00216391	0.998918	0.00108196	1	0.0271057	UpCRBM
ILMN_1688404	ZMYM4	9202	17.7008	27.5377	32.0159	0.00105042	0.999475	0.000525208	1	0.0166923	UpCRBM
ILMN_1668398	ZMYND17	118490	21.2576	28.1229	33.1661	0.000328033	0.999836	0.000164016	1	0.00819491	UpCRBM
ILMN_1763208	ZNF10	7556	15.5681	26.9234	29.222	0.00329897	0.998351	0.00164949	1	0.0355264	UpCRBM
ILMN_1759375	ZNF133	7692	23.1296	37.1939	39.2214	3.32787e-06	0.999998	1.66394e-06	1	0.000497072	UpCRBM
ILMN_1768809	ZNF134	7693	19.5987	31.0233	34.7209	0.000159891	0.99992	7.99453e-05	1	0.00494013	UpCRBM
ILMN_1723542	ZNF137	7696	18.7832	27.3343	27.8629	0.00217716	0.998911	0.00108858	1	0.0271733	UpCRBM
ILMN_1676745	ZNF142	7701	9.12088	32.6134	38.4456	0.000462572	0.999769	0.000231286	1	0.0099822	UpCRBM
ILMN_1674399	ZNF143	7702	19.3161	26.5937	27.733	0.002355	0.998823	0.0011775	1	0.0283147	UpCRBM
ILMN_1683487	ZNF154	7710	19.2253	30.5006	37.097	0.000108553	0.999946	5.42765e-05	1	0.00393487	UpCRBM
ILMN_1761409	ZNF167	55888	22.5972	30.383	30.0345	0.000301882	0.999849	0.000150941	1	0.00765608	UpCRBM
ILMN_1675788	ZNF175	7728	19.0703	27.9193	29.233	0.00135279	0.999324	0.000676396	1	0.019666	UpCRBM
ILMN_1744676	ZNF179	7732	22.9025	26.4489	30.7101	0.000607939	0.999696	0.000303969	1	0.0120415	UpCRBM
ILMN_1760982	ZNF187	7741	23.6726	39.2443	39.134	1.55805e-06	0.999999	7.79025e-07	1	0.000352692	UpCRBM
ILMN_1651905	ZNF187	7741	13.4283	26.9704	31.3983	0.0031326	0.998434	0.0015663	1	0.0345053	UpCRBM
ILMN_1669516	ZNF193	7746	30.1999	37.9314	34.0522	1.754e-06	0.999999	8.77e-07	1	0.000374142	UpCRBM
ILMN_1688515	ZNF195	7748	15.7727	30.8551	28.0526	0.00179411	0.999103	0.000897053	1	0.0237473	UpCRBM
ILMN_1670377	ZNF20	7568	23.3279	39.7669	21.0307	0.000237761	0.999881	0.00011888	1	0.00647971	UpCRBM
ILMN_1809951	ZNF200	7752	19.1218	30.3963	35.7554	0.000160946	0.99992	8.0473e-05	1	0.00494519	UpCRBM
ILMN_1811195	ZNF211	10520	24.8561	36.3117	37.0513	5.1722e-06	0.999997	2.5861e-06	1	0.000631359	UpCRBM
ILMN_1798533	ZNF22	7570	22.9285	38.402	33.4735	1.35529e-05	0.999993	6.77645e-06	1	0.00105125	UpCRBM
ILMN_1815885	ZNF228	7771	22.6239	28.684	30.0182	0.000451499	0.999774	0.00022575	1	0.00987777	UpCRBM
ILMN_1775085	ZNF232	7775	13.5085	32.1618	34.9694	0.000450279	0.999775	0.00022514	1	0.00987675	UpCRBM
ILMN_1806782	ZNF235	9310	19.0927	26.831	27.8615	0.00227819	0.998861	0.00113909	1	0.0277994	UpCRBM
ILMN_1792666	ZNF238	10472	25.6065	26.5559	29.512	0.00043797	0.999781	0.000218985	1	0.00977458	UpCRBM
ILMN_1757230	ZNF250	58500	21.7189	29.8432	31.9026	0.000265578	0.999867	0.000132789	1	0.00696405	UpCRBM
ILMN_1757408	ZNF256	10172	16.0557	26.7992	30.4529	0.0023931	0.998803	0.00119655	1	0.0284504	UpCRBM
ILMN_1815309	ZNF274	10782	29.2486	35.8366	30.9433	1.09378e-05	0.999995	5.46891e-06	1	0.000940483	UpCRBM
ILMN_1709377	ZNF28	7576	16.9138	30.2529	30.6333	0.000921078	0.999539	0.000460539	1	0.0154731	UpCRBM
ILMN_1802758	ZNF281	23528	23.6921	33.4759	32.6215	5.49237e-05	0.999973	2.74619e-05	1	0.00261465	UpCRBM
ILMN_1705449	ZNF285A	26974	19.6009	31.9511	35.5912	0.000100998	0.99995	5.04988e-05	1	0.00374671	UpCRBM
ILMN_1778560	ZNF3	7551	17.6077	28.7549	24.3182	0.00420839	0.997896	0.0021042	1	0.0416409	UpCRBM
ILMN_1728230	ZNF30	90075	25.8197	30.5944	30.4218	0.000123911	0.999938	6.19557e-05	1	0.00420313	UpCRBM
ILMN_1656504	ZNF304	57343	9.87176	24.6014	36.3168	0.00361369	0.998193	0.00180684	1	0.037672	UpCRBM
ILMN_1792078	ZNF313	55905	20.6379	34.0064	22.2675	0.00120832	0.999396	0.000604159	1	0.0182696	UpCRBM
ILMN_1792305	ZNF318	24149	14.2426	28.3998	33.6866	0.00121531	0.999392	0.000607655	1	0.0183404	UpCRBM
ILMN_1711361	ZNF319	57567	16.3473	34.4823	32.571	0.00024515	0.999877	0.000122575	1	0.00661607	UpCRBM
ILMN_1710873	ZNF330	27309	20.7987	26.0982	27.9579	0.00186715	0.999066	0.000933573	1	0.0245359	UpCRBM
ILMN_1759017	ZNF333	84449	18.8828	29.8371	30.4152	0.000703852	0.999648	0.000351926	1	0.0132549	UpCRBM
ILMN_1672743	ZNF334	55713	21.0707	26.9153	30.0685	0.000931311	0.999534	0.000465655	1	0.0155145	UpCRBM
ILMN_1663160	ZNF337	26152	26.202	30.6727	31.0422	9.44451e-05	0.999953	4.72225e-05	1	0.00355113	UpCRBM
ILMN_1742935	ZNF33B	7582	24.5315	26.6399	27.7636	0.000811778	0.999594	0.000405889	1	0.014453	UpCRBM
ILMN_1687981	ZNF34	80778	27.8554	35.0738	35.0888	5.88235e-06	0.999997	2.94118e-06	1	0.00064601	UpCRBM
ILMN_1693242	ZNF342	162979	24.627	26.622	26.4629	0.00107104	0.999464	0.00053552	1	0.0169061	UpCRBM
ILMN_1810832	ZNF343	79175	23.7168	32.3879	31.6965	9.27791e-05	0.999954	4.63895e-05	1	0.00350541	UpCRBM
ILMN_1744986	ZNF350	59348	16.8796	27.1652	32.5918	0.00118675	0.999407	0.000593376	1	0.0180817	UpCRBM
ILMN_1811997	ZNF364	27246	25.1602	30.5715	31.8776	0.000100104	0.99995	5.00518e-05	1	0.00372601	UpCRBM
ILMN_1707596	ZNF37A	7587	15.9592	30.5191	31.6215	0.000846417	0.999577	0.000423209	1	0.0147386	UpCRBM
ILMN_1764891	ZNF384	171017	20.3948	35.5987	39.1414	1.15424e-05	0.999994	5.77121e-06	1	0.000962621	UpCRBM
ILMN_1685467	ZNF397	84307	24.3968	30.6129	30.914	0.000151931	0.999924	7.59657e-05	1	0.00474711	UpCRBM
ILMN_1664292	ZNF415	55786	16.7971	30.7005	30.0928	0.000964354	0.999518	0.000482177	1	0.0158234	UpCRBM
ILMN_1680693	ZNF419	79744	12.8051	33.7172	40.1407	9.9775e-05	0.99995	4.98875e-05	1	0.00372601	UpCRBM
ILMN_1718950	ZNF433	163059	16.0377	30.2466	35.4699	0.000360732	0.99982	0.000180366	1	0.00867106	UpCRBM
ILMN_1684591	ZNF434	54925	29.0362	42.6726	38.6704	1.1588e-07	1	5.79398e-08	1	0.000155978	UpCRBM
ILMN_1792972	ZNF439	90594	22.7019	30.3916	29.4419	0.000339754	0.99983	0.000169877	1	0.0083375	UpCRBM
ILMN_1663754	ZNF442	79973	17.3015	26.4818	26.0452	0.00493708	0.997531	0.00246854	1	0.045998	UpCRBM
ILMN_1664096	ZNF491	126069	31.4588	36.7988	37.4881	5.77182e-07	1	2.88591e-07	1	0.000220762	UpCRBM
ILMN_1700238	ZNF500	26048	17.2253	23.3746	28.9819	0.00514887	0.997426	0.00257444	1	0.0472918	UpCRBM
ILMN_1655167	ZNF502	91392	24.8664	31.8268	35.5847	2.84591e-05	0.999986	1.42295e-05	1	0.00168674	UpCRBM
ILMN_1756795	ZNF510	22869	12.5263	25.5359	31.0042	0.0053105	0.997345	0.00265525	1	0.0480457	UpCRBM
ILMN_1679747	ZNF521	25925	35.4139	34.7262	32.6707	1.62764e-06	0.999999	8.1382e-07	1	0.000361075	UpCRBM
ILMN_1731358	ZNF532	55205	33.2331	39.4471	38.3455	1.03066e-07	1	5.15332e-08	1	0.000155978	UpCRBM
ILMN_1740490	ZNF545	284406	14.3894	24.6373	30.5496	0.00494156	0.997529	0.00247078	1	0.045998	UpCRBM
ILMN_1728228	ZNF548	147694	26.4978	33.2714	31.2762	4.15296e-05	0.999979	2.07648e-05	1	0.00215126	UpCRBM
ILMN_1760102	ZNF550	162972	18.8763	28.4198	30.7351	0.000902572	0.999549	0.000451286	1	0.0153346	UpCRBM
ILMN_1704441	ZNF556	80032	23.9492	27.4639	28.0136	0.000718974	0.999641	0.000359487	1	0.0134257	UpCRBM
ILMN_1677785	ZNF559	84527	17.067	24.9633	28.5161	0.00425861	0.997871	0.0021293	1	0.0420253	UpCRBM
ILMN_1658080	ZNF573	126231	21.0549	29.2102	32.6479	0.000299607	0.99985	0.000149803	1	0.00763963	UpCRBM
ILMN_1687711	ZNF576	79177	11.2602	27.0403	30.6334	0.00535631	0.997322	0.00267815	1	0.0483812	UpCRBM
ILMN_1667322	ZNF577	84765	17.4731	30.837	26.7927	0.00168691	0.999157	0.000843456	1	0.0227078	UpCRBM
ILMN_1731813	ZNF585B	92285	14.6618	24.8554	30.6588	0.00441143	0.997794	0.00220572	1	0.0427628	UpCRBM
ILMN_1666727	ZNF586	54807	27.3759	32.7781	32.5352	2.68959e-05	0.999987	1.34479e-05	1	0.00164823	UpCRBM
ILMN_1725679	ZNF596	169270	16.4589	27.5304	28.0245	0.00315155	0.998424	0.00157578	1	0.0345425	UpCRBM
ILMN_1664928	ZNF599	148103	21.768	27.0327	27.9934	0.00124887	0.999376	0.000624437	1	0.0187196	UpCRBM
ILMN_1763641	ZNF614	80110	22.0858	29.4362	29.6471	0.000464545	0.999768	0.000232272	1	0.0100053	UpCRBM
ILMN_1672135	ZNF615	284370	20.3481	29.5518	31.4454	0.000431244	0.999784	0.000215622	1	0.00972227	UpCRBM
ILMN_1696276	ZNF653	115950	17.4665	25.4869	27.7733	0.00413829	0.997931	0.00206915	1	0.0410205	UpCRBM
ILMN_1692340	ZNF662	389114	25.7676	35.2506	33.1035	1.74411e-05	0.999991	8.72056e-06	1	0.00120727	UpCRBM
ILMN_1692903	ZNF663	284747	26.3338	30.2691	29.9783	0.000133565	0.999933	6.67825e-05	1	0.00438087	UpCRBM
ILMN_1713454	ZNF671	79891	31.2997	34.5837	35.5369	2.26751e-06	0.999999	1.13376e-06	1	0.000399226	UpCRBM
ILMN_1759008	ZNF689	115509	15.0219	32.9527	40.0932	7.21895e-05	0.999964	3.60948e-05	1	0.00303305	UpCRBM
ILMN_1784281	ZNF7	7553	12.0693	33.8157	34.5805	0.000458149	0.999771	0.000229075	1	0.0099448	UpCRBM
ILMN_1663281	ZNF702	79986	23.3971	23.501	24.1122	0.0042829	0.997859	0.00214145	1	0.0422275	UpCRBM
ILMN_1781720	ZNF720	124411	13.9347	25.7517	30.4923	0.00436515	0.997817	0.00218258	1	0.0424963	UpCRBM
ILMN_1706342	ZNF746	155061	10.2222	25.8401	40.0781	0.00117477	0.999413	0.000587386	1	0.0179485	UpCRBM
ILMN_1804263	ZNF76	7629	13.4569	29.3076	28.2059	0.00372052	0.99814	0.00186026	1	0.0383531	UpCRBM
ILMN_1767144	ZNF767	79970	26.1483	33.4745	32.3946	3.15841e-05	0.999984	1.5792e-05	1	0.00177833	UpCRBM
ILMN_1734608	ZNF77	58492	20.1799	31.2691	31.9192	0.000264649	0.999868	0.000132325	1	0.00695614	UpCRBM
ILMN_1734254	ZNF770	54989	10.2793	26.894	36.3331	0.00208362	0.998958	0.00104181	1	0.0264247	UpCRBM
ILMN_1738124	ZNF772	400720	15.4844	25.5268	31.2168	0.00295867	0.998521	0.00147934	1	0.033272	UpCRBM
ILMN_1741313	ZNF782	158431	19.5071	31.8145	34.4429	0.000143648	0.999928	7.18241e-05	1	0.0046184	UpCRBM
ILMN_1789364	ZNF789	285989	29.5681	32.3002	32.5343	1.74287e-05	0.999991	8.71436e-06	1	0.00120727	UpCRBM
ILMN_1810127	ZNF789	285989	25.1563	31.1649	30.7372	0.000115582	0.999942	5.77908e-05	1	0.0040829	UpCRBM
ILMN_1669696	ZNF792	126375	20.4733	29.9875	30.9513	0.000425824	0.999787	0.000212912	1	0.00963926	UpCRBM
ILMN_1728710	ZNF816A	125893	21.2014	27.926	25.6928	0.00190011	0.99905	0.000950054	1	0.0247123	UpCRBM
ILMN_1716921	ZNF83	55769	26.6662	26.6782	28.5748	0.000421703	0.999789	0.000210852	1	0.0096049	UpCRBM
ILMN_1809566	ZSCAN16	80345	25.7852	36.0683	25.7522	0.00010272	0.999949	5.136e-05	1	0.0037979	UpCRBM
ILMN_1804637	ZSCAN21	7589	16.3241	32.4291	37.509	0.000118668	0.999941	5.93339e-05	1	0.00415339	UpCRBM
ILMN_1753407	ZXDC	79364	14.6788	29.5977	33.8384	0.000822778	0.999589	0.000411389	1	0.0145091	UpCRBM
ILMN_1786396	ZZEF1	23140	15.5968	29.8698	28.0583	0.0022815	0.998859	0.00114075	1	0.0278092	UpCRBM
ILMN_1703142	MARCH2	51257	-24.7487	-7.43934	-9.35791	6.87394e-05	3.43697e-05	0.999966	0.00319838	1	DownCRBM
ILMN_1789991	MARCH4	57574	-26.5308	-17.1674	-1.65757	2.59122e-05	1.29561e-05	0.999987	0.00175255	1	DownCRBM
ILMN_1698554	AACS	65985	-24.4644	-9.63572	8.09431	0.00268877	0.00134438	0.998656	0.0403025	1	DownCRBM
ILMN_1726986	AADAT	51166	-34.1492	-15.4658	-8.78667	5.98492e-07	2.99246e-07	1	0.000189833	1	DownCRBM
ILMN_1762093	ABCC12	94160	-21.5324	-15.8915	9.27121	0.00164374	0.000821872	0.999178	0.0288488	1	DownCRBM
ILMN_1719498	ABHD7	253152	-23.526	-16.7625	-0.315333	8.76491e-05	4.38245e-05	0.999956	0.00373924	1	DownCRBM
ILMN_1758825	ABLIM2	84448	-25.8769	-11.8186	-1.07017	0.000146239	7.31193e-05	0.999927	0.00552089	1	DownCRBM
ILMN_1672878	ABR	29	-35.0979	-20.5071	-0.998499	1.11077e-06	5.55387e-07	0.999999	0.000273794	1	DownCRBM
ILMN_1764321	ACOT4	122970	-23.6899	-9.93459	6.3097	0.00201846	0.00100923	0.998991	0.0329247	1	DownCRBM
ILMN_1740265	ACOT7	11332	-18.8523	-5.02326	-4.0482	0.00161719	0.000808594	0.999191	0.0285635	1	DownCRBM
ILMN_1654468	ACRV1	56	-24.4393	-8.4742	2.97948	0.00115561	0.000577807	0.999422	0.0228139	1	DownCRBM
ILMN_1676609	ACSBG1	23205	-8.6879	-5.02962	-10.2291	0.00314532	0.00157266	0.998427	0.044843	1	DownCRBM
ILMN_1798892	ACTN1	87	-28.807	-20.8847	6.55891	5.05283e-05	2.52642e-05	0.999975	0.00264368	1	DownCRBM
ILMN_1654422	ACTN2	88	-23.9835	-10.4185	-6.03265	9.12201e-05	4.56101e-05	0.999954	0.00386188	1	DownCRBM
ILMN_1663112	ADAMTS8	11095	-29.0028	-22.0885	-3.58112	1.76169e-06	8.80844e-07	0.999999	0.000355284	1	DownCRBM
ILMN_1810691	ADCY2	108	-30.4962	-16.8189	0.494011	1.87462e-05	9.37312e-06	0.999991	0.0014242	1	DownCRBM
ILMN_1708588	ADCY5	111	-24.3283	-5.92266	-3.74214	0.000452518	0.000226259	0.999774	0.0119793	1	DownCRBM
ILMN_1763344	ADCYAP1	116	-20.397	-6.83416	-9.78357	0.000201477	0.000100738	0.999899	0.00681335	1	DownCRBM
ILMN_1733259	ADORA3	140	-12.0418	-6.95615	-5.71631	0.00284799	0.001424	0.998576	0.0414755	1	DownCRBM
ILMN_1679754	ADRA1B	147	-28.2973	-17.7263	-2.45758	1.11002e-05	5.55008e-06	0.999994	0.000999915	1	DownCRBM
ILMN_1770454	AGRIN	375790	-17.4119	-8.38831	-3.25581	0.00123947	0.000619736	0.99938	0.0238271	1	DownCRBM
ILMN_1723521	AJAP1	55966	-22.2663	-12.0972	2.28219	0.000688804	0.000344402	0.999656	0.0156072	1	DownCRBM
ILMN_1690676	AK5	26289	-35.1468	-24.3641	-8.04422	2.71278e-08	1.35639e-08	1	7.52254e-05	1	DownCRBM
ILMN_1656593	AK5	26289	-17.0334	-8.50021	-1.06496	0.00209399	0.001047	0.998953	0.0339074	1	DownCRBM
ILMN_1752247	AKAP13	11214	-24.2593	-12.0254	-9.19269	2.35264e-05	1.17632e-05	0.999988	0.00161535	1	DownCRBM
ILMN_1709101	AKAP13	11214	-24.6301	-7.53829	-1.68437	0.000471965	0.000235982	0.999764	0.0123354	1	DownCRBM
ILMN_1670870	ALCAM	214	-18.4027	-7.87502	-12.5261	0.000123328	6.16639e-05	0.999938	0.00486816	1	DownCRBM
ILMN_1753135	ALK	238	-29.1324	-13.2272	-5.30627	1.4163e-05	7.08149e-06	0.999993	0.00113914	1	DownCRBM
ILMN_1701603	ALPL	249	-14.0121	-10.5582	-4.21574	0.00124411	0.000622057	0.999378	0.0238749	1	DownCRBM
ILMN_1792409	AMOT	154796	-17.3747	-9.43882	-3.5572	0.000925822	0.000462911	0.999537	0.0193394	1	DownCRBM
ILMN_1769764	ANKRD55	79722	-17.0464	-6.14452	-7.65395	0.000821581	0.000410791	0.999589	0.0178918	1	DownCRBM
ILMN_1799115	ANKS1B	56899	-20.687	-5.81146	-1.06066	0.00180748	0.000903741	0.999096	0.0307966	1	DownCRBM
ILMN_1712806	AP1S1	1174	-26.5282	-14.7981	4.18013	0.000223867	0.000111934	0.999888	0.00728193	1	DownCRBM
ILMN_1662927	AP1S1	1174	-19.7559	-12.9968	6.80843	0.00253387	0.00126694	0.998733	0.0386068	1	DownCRBM
ILMN_1749738	APBA2BP	63941	-26.0526	-10.7899	-2.87592	0.000114746	5.7373e-05	0.999943	0.00461146	1	DownCRBM
ILMN_1718023	APEH	327	-27.3855	-4.54333	2.43457	0.00133128	0.000665638	0.999334	0.025028	1	DownCRBM
ILMN_1793360	APITD1	378708	-25.7589	-12.868	1.37529	0.000213935	0.000106968	0.999893	0.00704146	1	DownCRBM
ILMN_1763834	APLP1	333	-14.7061	-3.27561	-6.84751	0.00288746	0.00144373	0.998556	0.0418117	1	DownCRBM
ILMN_1736112	ARHGAP10	79658	-16.6277	-10.2782	0.464922	0.00215687	0.00107844	0.998922	0.0346102	1	DownCRBM
ILMN_1801833	ARHGAP24	83478	-20.3801	-10.1036	-11.0398	6.34107e-05	3.17054e-05	0.999968	0.00308488	1	DownCRBM
ILMN_1775441	ARHGAP24	83478	-17.95	-2.13213	-9.97879	0.000989228	0.000494614	0.999505	0.0202819	1	DownCRBM
ILMN_1765876	ARHGAP24	83478	-11.5533	-4.49427	-7.96748	0.00324676	0.00162338	0.998377	0.0458766	1	DownCRBM
ILMN_1777998	ARHGAP25	9938	-23.3393	-8.10974	-0.0370127	0.000798897	0.000399448	0.999601	0.017478	1	DownCRBM
ILMN_1734742	ARHGDIA	396	-23.2426	-6.95385	-4.29702	0.000394325	0.000197163	0.999803	0.0109896	1	DownCRBM
ILMN_1678143	ARHGDIB	397	-10.9771	-6.63815	-6.29294	0.00329925	0.00164963	0.99835	0.0464998	1	DownCRBM
ILMN_1666076	ARHGEF4	50649	-32.8139	-16.6685	-4.62851	2.27533e-06	1.13766e-06	0.999999	0.000400602	1	DownCRBM
ILMN_1803423	ARHGEF6	9459	-11.3481	-3.87146	-11.5656	0.00181258	0.000906289	0.999094	0.0308361	1	DownCRBM
ILMN_1721626	ARID5B	84159	-27.513	-12.2593	-5.59622	2.60912e-05	1.30456e-05	0.999987	0.00175396	1	DownCRBM
ILMN_1718046	ARNT2	9915	-36.358	-19.6683	2.22264	2.75172e-06	1.37586e-06	0.999999	0.000442348	1	DownCRBM
ILMN_1664001	ARSF	416	-18.0298	-6.01859	-4.60085	0.00136413	0.000682065	0.999318	0.0254301	1	DownCRBM
ILMN_1724162	ARX	170302	-28.7783	-15.7564	7.8559	0.000263103	0.000131551	0.999868	0.00822066	1	DownCRBM
ILMN_1808587	ATBF1	463	-11.9874	-5.93204	-10.3054	0.00134687	0.000673434	0.999327	0.0252356	1	DownCRBM
ILMN_1790978	ATG7	10533	-34.9695	-19.7685	-5.86651	2.98834e-07	1.49417e-07	1	0.000150495	1	DownCRBM
ILMN_1673991	ATIC	471	-26.4277	-2.7137	-1.33215	0.00105043	0.000525216	0.999475	0.0211844	1	DownCRBM
ILMN_1803509	ATP5I	521	-17.3681	-6.3598	-11.2989	0.000309381	0.00015469	0.999845	0.00912674	1	DownCRBM
ILMN_1810235	ATP6V1E2	90423	-26.127	-5.84268	-4.15965	0.000280078	0.000140039	0.99986	0.00858228	1	DownCRBM
ILMN_1763387	ATP6V1H	51606	-25.2199	-11.2423	7.41572	0.00143116	0.00071558	0.999284	0.0261093	1	DownCRBM
ILMN_1786966	ATRNL1	26033	-20.1745	-15.496	-0.265396	0.000266656	0.000133328	0.999867	0.00826311	1	DownCRBM
ILMN_1709907	B3GALT2	8707	-20.5537	-12.6512	-0.481616	0.000459178	0.000229589	0.99977	0.0121267	1	DownCRBM
ILMN_1764813	B3GALTL	145173	-21.2179	-6.2732	-1.53149	0.00132962	0.000664809	0.999335	0.025028	1	DownCRBM
ILMN_1761093	B3GAT1	27087	-21.6839	-9.04937	-1.89937	0.000596318	0.000298159	0.999702	0.014379	1	DownCRBM
ILMN_1707717	BAALC	79870	-23.9303	-6.92656	1.44877	0.00128264	0.000641322	0.999359	0.0244452	1	DownCRBM
ILMN_1687751	BAALC	79870	-21.9313	-6.54604	0.234274	0.00159599	0.000797996	0.999202	0.0282792	1	DownCRBM
ILMN_1773109	BAI2	576	-28.4224	-12.6978	7.35634	0.000522788	0.000261394	0.999739	0.0132392	1	DownCRBM
ILMN_1810550	BAIAP3	8938	-23.6604	-12.8926	-4.26457	8.24067e-05	4.12033e-05	0.999959	0.00357053	1	DownCRBM
ILMN_1812403	BCAP31	10134	-26.2016	-4.37919	-6.14068	0.000241806	0.000120903	0.999879	0.00768514	1	DownCRBM
ILMN_1766169	BCAT1	586	-19.0941	-7.78769	-11.2113	0.000149931	7.49656e-05	0.999925	0.00563741	1	DownCRBM
ILMN_1698224	BCL11A	53335	-28.0748	-15.2836	-2.6135	2.24747e-05	1.12373e-05	0.999989	0.00157778	1	DownCRBM
ILMN_1659800	BCL11A	53335	-20.0421	-14.1006	0.164352	0.000425552	0.000212776	0.999787	0.0114847	1	DownCRBM
ILMN_1665761	BCL11B	64919	-34.5422	-19.4469	-1.02334	1.80621e-06	9.03105e-07	0.999999	0.000357759	1	DownCRBM
ILMN_1768534	BHLHB2	8553	-23.4498	-14.3735	-2.34737	9.74729e-05	4.87364e-05	0.999951	0.00406455	1	DownCRBM
ILMN_1673518	BRWD1	54014	-29.1947	-16.8158	-1.18421	1.63685e-05	8.18423e-06	0.999992	0.00127158	1	DownCRBM
ILMN_1707339	BTG3	10950	-12.8063	-8.34054	-5.49961	0.00192922	0.000964609	0.999035	0.0321788	1	DownCRBM
ILMN_1770399	C10ORF107	219621	-15.0983	-7.36944	-6.74791	0.00114651	0.000573253	0.999427	0.0227496	1	DownCRBM
ILMN_1754538	C10ORF58	84293	-29.9078	-12.6664	-5.2123	1.39071e-05	6.95355e-06	0.999993	0.00113425	1	DownCRBM
ILMN_1788878	C10ORF83	118812	-24.7063	-9.37874	4.35868	0.00121767	0.000608835	0.999391	0.0235714	1	DownCRBM
ILMN_1779596	C11ORF51	25906	-24.0204	-7.10387	-1.5042	0.00062095	0.000310475	0.99969	0.0147551	1	DownCRBM
ILMN_1727248	C14ORF173	64423	-22.3598	-6.95904	-8.29702	0.000180308	9.0154e-05	0.99991	0.00630907	1	DownCRBM
ILMN_1686082	C14ORF79	122616	-21.5218	-7.72376	1.5103	0.00177159	0.000885795	0.999114	0.0303798	1	DownCRBM
ILMN_1765880	C16ORF57	79650	-29.1969	-7.11922	-3.06132	0.000132526	6.6263e-05	0.999934	0.00512188	1	DownCRBM
ILMN_1790537	C16ORF75	116028	-22.9163	-15.6284	2.87355	0.000300149	0.000150074	0.99985	0.00892561	1	DownCRBM
ILMN_1713686	C16ORF77	146433	-22.5275	-16.0286	-4.7847	4.12433e-05	2.06217e-05	0.999979	0.002346	1	DownCRBM
ILMN_1773695	C17ORF76	388341	-26.7341	-7.66838	4.3014	0.00115797	0.000578987	0.999421	0.0228139	1	DownCRBM
ILMN_1705656	C18ORF16	147429	-17.9546	-7.22976	-2.0311	0.00186145	0.000930726	0.999069	0.0314265	1	DownCRBM
ILMN_1690442	C18ORF45	85019	-15.8762	-9.49712	1.29999	0.00347048	0.00173524	0.998265	0.0483355	1	DownCRBM
ILMN_1813374	C19ORF28	126321	-25.6467	-7.30985	-1.4704	0.000419683	0.000209841	0.99979	0.0114096	1	DownCRBM
ILMN_1694530	C19ORF58	79016	-31.2944	-15.1566	-11.7178	5.99003e-07	2.99501e-07	1	0.000189833	1	DownCRBM
ILMN_1802799	C1ORF108	79647	-17.2745	-3.00026	-4.90673	0.00279971	0.00139985	0.9986	0.0411852	1	DownCRBM
ILMN_1674817	C1ORF115	79762	-29.1766	-18.1266	2.49747	3.2073e-05	1.60365e-05	0.999984	0.00202133	1	DownCRBM
ILMN_1675024	C1ORF165	79656	-22.9908	-9.76678	-5.99087	0.000137921	6.89605e-05	0.999931	0.00527254	1	DownCRBM
ILMN_1661595	C1ORF53	388722	-18.9528	-9.28428	0.618017	0.00174311	0.000871555	0.999128	0.0301162	1	DownCRBM
ILMN_1682428	C1ORF59	113802	-21.7789	-10.7241	-6.43521	0.000128445	6.42224e-05	0.999936	0.00501658	1	DownCRBM
ILMN_1758599	C1ORF76	148753	-14.743	-3.25236	-7.59135	0.00246954	0.00123477	0.998765	0.0378867	1	DownCRBM
ILMN_1732347	C1ORF93	127281	-29.5589	-11.6466	2.94718	0.000178986	8.94931e-05	0.999911	0.00628264	1	DownCRBM
ILMN_1715927	C20ORF102	128434	-28.2499	-12.739	7.09722	0.000505722	0.000252861	0.999747	0.0128795	1	DownCRBM
ILMN_1713561	C20ORF103	24141	-15.5077	-13.8619	-8.39529	0.000153504	7.67519e-05	0.999923	0.00573287	1	DownCRBM
ILMN_1697363	C20ORF27	54976	-16.6566	-4.41244	-4.08558	0.00279358	0.00139679	0.998603	0.0411664	1	DownCRBM
ILMN_1738418	C20ORF28	25876	-21.4702	-10.3969	2.88886	0.00135875	0.000679374	0.999321	0.0253724	1	DownCRBM
ILMN_1751228	C20ORF46	55321	-23.633	-11.3449	-8.79751	3.71209e-05	1.85605e-05	0.999981	0.00217855	1	DownCRBM
ILMN_1652512	C21ORF25	25966	-18.9103	-8.94643	-12.3877	8.59703e-05	4.29851e-05	0.999957	0.00369188	1	DownCRBM
ILMN_1789405	C22ORF25	128989	-27.2902	-9.03459	-9.5545	2.23359e-05	1.11679e-05	0.999989	0.00157778	1	DownCRBM
ILMN_1759195	C22ORF9	23313	-22.7636	-7.98899	-3.47875	0.000416834	0.000208417	0.999792	0.011388	1	DownCRBM
ILMN_1757347	C22ORF9	23313	-23.8874	-8.29869	-2.06399	0.000424182	0.000212091	0.999788	0.0114757	1	DownCRBM
ILMN_1744196	C6ORF1	221491	-18.7705	-4.34798	-1.35289	0.00332562	0.00166281	0.998337	0.0468119	1	DownCRBM
ILMN_1769789	C6ORF142	90523	-22.8418	-14.3831	9.35728	0.00178244	0.000891221	0.999109	0.0304808	1	DownCRBM
ILMN_1691668	C6ORF154	221424	-23.8329	-12.7856	2.79128	0.000472617	0.000236308	0.999764	0.0123354	1	DownCRBM
ILMN_1757837	C6ORF165	154313	-20.1957	-3.8312	-3.52193	0.00178999	0.000894997	0.999105	0.0305456	1	DownCRBM
ILMN_1726597	C6ORF32	9750	-26.2582	-18.3571	-1.88601	1.87179e-05	9.35897e-06	0.999991	0.0014242	1	DownCRBM
ILMN_1684852	C8ORF46	254778	-31.4533	-18.8495	-10.2165	2.79211e-07	1.39605e-07	1	0.000150495	1	DownCRBM
ILMN_1723709	C9ORF116	138162	-26.1387	-10.3118	-4.93056	7.44127e-05	3.72063e-05	0.999963	0.00337233	1	DownCRBM
ILMN_1763695	C9ORF24	84688	-29.0057	-14.2788	-6.06532	8.68497e-06	4.34249e-06	0.999996	0.000890016	1	DownCRBM
ILMN_1705313	C9ORF91	203197	-31.4358	-19.0549	-2.257	3.36749e-06	1.68374e-06	0.999998	0.000511673	1	DownCRBM
ILMN_1677746	CABP1	9478	-24.6554	-9.85259	7.6057	0.002238	0.001119	0.998881	0.0353113	1	DownCRBM
ILMN_1779823	CACNA1H	8912	-26.3279	-12.5691	3.09981	0.000309072	0.000154536	0.999845	0.00912674	1	DownCRBM
ILMN_1754076	CACNA2D3	55799	-29.6831	-16.7487	-5.55643	4.04254e-06	2.02127e-06	0.999998	0.000568676	1	DownCRBM
ILMN_1659733	CACNB1	782	-26.5723	-14.4005	8.31662	0.000655897	0.000327949	0.999672	0.0151883	1	DownCRBM
ILMN_1763604	CACNB1	782	-23.7731	-11.6056	9.62083	0.00280758	0.00140379	0.998596	0.0411852	1	DownCRBM
ILMN_1768758	CACNG3	10368	-33.1112	-21.8656	0.575412	2.12273e-06	1.06137e-06	0.999999	0.000389009	1	DownCRBM
ILMN_1804339	CAMK1G	57172	-28.6042	-18.7357	-3.33844	5.87109e-06	2.93555e-06	0.999997	0.000715628	1	DownCRBM
ILMN_1666445	CAMK2A	815	-35.951	-24.5222	0.3801	3.68584e-07	1.84292e-07	1	0.000170347	1	DownCRBM
ILMN_1809695	CAMK2G	818	-28.3021	-6.4332	0.634858	0.000475982	0.000237991	0.999762	0.0123934	1	DownCRBM
ILMN_1794863	CAMK2N1	55450	-24.732	-15.1374	2.32179	0.000195634	9.78172e-05	0.999902	0.00673585	1	DownCRBM
ILMN_1667381	CAMKV	79012	-38.4122	-26.7749	-1.97076	3.46197e-08	1.73098e-08	1	7.68003e-05	1	DownCRBM
ILMN_1762825	CANX	821	-27.0795	-16.0918	13.0834	0.00118677	0.000593385	0.999407	0.0230941	1	DownCRBM
ILMN_1797604	CAP1	10487	-26.7627	-3.27064	-0.0944983	0.00114236	0.000571182	0.999429	0.0227081	1	DownCRBM
ILMN_1691237	CAP2	10486	-26.8575	-15.084	10.4888	0.000869317	0.000434659	0.999565	0.0185076	1	DownCRBM
ILMN_1809477	CARHSP1	23589	-13.1785	-6.16345	-7.11968	0.00201142	0.00100571	0.998994	0.0328622	1	DownCRBM
ILMN_1708983	CASC1	55259	-26.7532	-9.60314	-7.80103	3.56478e-05	1.78239e-05	0.999982	0.00214894	1	DownCRBM
ILMN_1658835	CAV2	858	-16.512	-5.12323	-3.92163	0.00256728	0.00128364	0.998716	0.0390086	1	DownCRBM
ILMN_1796069	CBLN2	147381	-27.3572	-16.868	-7.53405	4.09762e-06	2.04881e-06	0.999998	0.000568676	1	DownCRBM
ILMN_1699768	CBLN4	140689	-21.4254	-17.3603	-9.46493	1.01124e-05	5.05618e-06	0.999995	0.000934719	1	DownCRBM
ILMN_1801766	CCDC109B	55013	-19.5885	-11.8334	-7.57943	0.000121132	6.05662e-05	0.999939	0.00481577	1	DownCRBM
ILMN_1665810	CCDC113	29070	-28.4522	-10.6121	-1.0344	0.000109244	5.46221e-05	0.999945	0.0044386	1	DownCRBM
ILMN_1677239	CCDC14	64770	-19.9637	-8.39837	-5.07819	0.000477302	0.000238651	0.999761	0.0123987	1	DownCRBM
ILMN_1671295	CCDC3	83643	-32.1439	-29.7409	0.431449	2.1411e-07	1.07055e-07	1	0.000148432	1	DownCRBM
ILMN_1657547	CCDC34	91057	-19.4597	-7.8355	1.91633	0.00280967	0.00140484	0.998595	0.0411852	1	DownCRBM
ILMN_1686915	CCDC34	91057	-19.2212	-9.11542	3.88747	0.00339239	0.00169619	0.998304	0.0475642	1	DownCRBM
ILMN_1678086	CCDC74A	90557	-26.0909	-12.4383	-6.61469	2.69232e-05	1.34616e-05	0.999987	0.00179899	1	DownCRBM
ILMN_1728979	CCDC74B	91409	-25.831	-8.1018	-4.42508	0.000160748	8.03741e-05	0.99992	0.00589285	1	DownCRBM
ILMN_1731107	CCDC92	80212	-21.6705	-2.92517	-3.55898	0.00160893	0.000804463	0.999196	0.0284629	1	DownCRBM
ILMN_1712943	CCK	885	-27.7978	-21.1768	-0.922645	7.30798e-06	3.65399e-06	0.999996	0.000810602	1	DownCRBM
ILMN_1726415	CCNA1	8900	-26.2699	-19.3848	-10.9907	8.71937e-07	4.35969e-07	1	0.000241788	1	DownCRBM
ILMN_1667081	CCND2	894	-24.208	-15.5618	10.6886	0.00140662	0.000703311	0.999297	0.0258744	1	DownCRBM
ILMN_1708991	CCNY	219771	-27.7041	-8.10441	-5.52911	7.74134e-05	3.87067e-05	0.999961	0.00343468	1	DownCRBM
ILMN_1683450	CDCA5	113130	-20.8403	-6.5036	2.79298	0.00339622	0.00169811	0.998302	0.0475642	1	DownCRBM
ILMN_1672611	CDH11	1009	-15.8344	-6.02312	-4.81417	0.00201167	0.00100584	0.998994	0.0328622	1	DownCRBM
ILMN_1766925	CDH13	1012	-27.2038	-20.09	-6.59659	2.13934e-06	1.06967e-06	0.999999	0.000389009	1	DownCRBM
ILMN_1769891	CDH4	1002	-17.9032	-13.7131	0.805543	0.000853037	0.000426519	0.999573	0.0182707	1	DownCRBM
ILMN_1766675	CDH6	1004	-18.7949	-3.48022	-3.79707	0.00238812	0.00119406	0.998806	0.0371039	1	DownCRBM
ILMN_1757020	CDH8	1006	-25.0586	-18.9958	-10.9844	1.41027e-06	7.05136e-07	0.999999	0.000312855	1	DownCRBM
ILMN_1736518	CDH9	1007	-25.5548	-14.9383	8.28492	0.000714473	0.000357237	0.999643	0.0159777	1	DownCRBM
ILMN_1754375	CDK5	1020	-22.7254	-8.41569	4.12213	0.00210857	0.00105429	0.998946	0.0340441	1	DownCRBM
ILMN_1717803	CDK5R2	8941	-22.6338	-10.0212	5.81069	0.00219053	0.00109527	0.998905	0.0349603	1	DownCRBM
ILMN_1693014	CEBPB	1051	-16.5685	-9.01963	-2.01513	0.0016782	0.000839099	0.999161	0.0293605	1	DownCRBM
ILMN_1711208	CELSR2	1952	-28.6226	-9.87315	1.25442	0.000225581	0.000112791	0.999887	0.00729777	1	DownCRBM
ILMN_1695645	CETN2	1069	-26.3177	-6.99527	-2.07768	0.000337164	0.000168582	0.999831	0.00971303	1	DownCRBM
ILMN_1777190	CFD	1675	-15.4114	-8.93191	-4.05319	0.00138465	0.000692324	0.999308	0.0256403	1	DownCRBM
ILMN_1730229	CGNL1	84952	-10.5915	-6.08638	-8.6934	0.00242256	0.00121128	0.998789	0.0374248	1	DownCRBM
ILMN_1785161	CHCHD6	84303	-22.9326	-9.80623	5.30763	0.00194362	0.000971812	0.999028	0.032354	1	DownCRBM
ILMN_1698148	CHD5	26038	-24.1125	-13.1568	5.02387	0.000687528	0.000343764	0.999656	0.0156072	1	DownCRBM
ILMN_1669410	CHGA	1113	-28.4114	-18.7265	-13.0463	2.87899e-07	1.4395e-07	1	0.000150495	1	DownCRBM
ILMN_1678493	CHN1	1123	-29.2969	-21.246	2.08789	1.1544e-05	5.77198e-06	0.999994	0.000999915	1	DownCRBM
ILMN_1779401	CHP	11261	-22.8266	-5.75666	0.703	0.00174995	0.000874977	0.999125	0.0301405	1	DownCRBM
ILMN_1751689	CHRM1	1128	-30.6256	-19.5321	1.81203	1.22351e-05	6.11756e-06	0.999994	0.00102812	1	DownCRBM
ILMN_1710410	CHRM3	1131	-27.7237	-21.2418	-6.58983	1.28841e-06	6.44205e-07	0.999999	0.000304065	1	DownCRBM
ILMN_1677719	CHST1	8534	-32.3915	-21.0188	-5.72419	4.56346e-07	2.28173e-07	1	0.000184038	1	DownCRBM
ILMN_1740407	CHSY-2	337876	-29.4606	-23.5221	-1.82531	1.71422e-06	8.57109e-07	0.999999	0.000355284	1	DownCRBM
ILMN_1656899	CIB1	10519	-22.7933	-6.11403	-3.50454	0.000637047	0.000318524	0.999681	0.0149124	1	DownCRBM
ILMN_1788184	CIDEA	1149	-26.9014	-15.1496	-8.48341	5.8331e-06	2.91655e-06	0.999997	0.000715628	1	DownCRBM
ILMN_1731237	CLSTN2	64084	-19.8731	-9.94266	-7.03762	0.000208916	0.000104458	0.999896	0.00693801	1	DownCRBM
ILMN_1815319	CMTM4	146223	-22.9534	-7.87118	-0.0797807	0.000904802	0.000452401	0.999548	0.0190438	1	DownCRBM
ILMN_1726769	CNDP2	55748	-24.1047	-3.61315	-7.74338	0.000315432	0.000157716	0.999842	0.00925601	1	DownCRBM
ILMN_1749071	CNIH3	149111	-22.4735	-14.8387	3.87793	0.000507425	0.000253712	0.999746	0.0128795	1	DownCRBM
ILMN_1717599	CNTN3	5067	-18.2167	-12.2953	4.20014	0.00228426	0.00114213	0.998858	0.035939	1	DownCRBM
ILMN_1690223	CNTNAP2	26047	-33.0614	-15.9859	-14.2616	1.11908e-07	5.59541e-08	1	0.000117743	1	DownCRBM
ILMN_1789507	COL11A1	1301	-18.6755	-10.2582	-3.31645	0.000617841	0.000308921	0.999691	0.0147551	1	DownCRBM
ILMN_1729117	COL5A2	1290	-24.5095	-14.4883	0.957659	0.000171895	8.59473e-05	0.999914	0.0061505	1	DownCRBM
ILMN_1814770	CPNE4	131034	-29.0775	-20.7015	-1.78233	4.57831e-06	2.28915e-06	0.999998	0.000611839	1	DownCRBM
ILMN_1806500	CPNE5	57699	-26.9389	-14.9958	3.06042	0.000146334	7.31672e-05	0.999927	0.00552089	1	DownCRBM
ILMN_1722294	CPNE8	144402	-21.427	-14.042	10.8057	0.00339432	0.00169716	0.998303	0.0475642	1	DownCRBM
ILMN_1683998	CREG2	200407	-20.5529	-17.9466	-6.85277	2.27419e-05	1.1371e-05	0.999989	0.0015865	1	DownCRBM
ILMN_1668035	CRH	1392	-15.5964	-11.5121	-2.68773	0.00102422	0.000512111	0.999488	0.0208453	1	DownCRBM
ILMN_1761312	CRHBP	1393	-17.3779	-11.4504	-6.89305	0.000263907	0.000131953	0.999868	0.00822263	1	DownCRBM
ILMN_1694432	CRIP2	1397	-28.2741	-15.8022	-0.52506	3.30878e-05	1.65439e-05	0.999983	0.00206185	1	DownCRBM
ILMN_1672389	CRYZ	1429	-17.7923	-8.18874	-8.9232	0.000322533	0.000161266	0.999839	0.00938984	1	DownCRBM
ILMN_1686623	CSF1R	1436	-9.29048	-7.14225	-7.83252	0.00298663	0.00149331	0.998507	0.0430229	1	DownCRBM
ILMN_1659781	CSMD3	114788	-24.4296	-12.9193	-0.686216	0.000171271	8.56353e-05	0.999914	0.00614801	1	DownCRBM
ILMN_1796901	CTNNA2	1496	-25.6076	-17.9752	-2.52999	2.05675e-05	1.02838e-05	0.99999	0.00150089	1	DownCRBM
ILMN_1759766	CTXN1	404217	-32.2783	-26.0956	-4.00554	1.55208e-07	7.76039e-08	1	0.000122969	1	DownCRBM
ILMN_1669876	CUTL2	23316	-19.7515	-14.8479	5.28599	0.00123483	0.000617415	0.999383	0.0237791	1	DownCRBM
ILMN_1654072	CX3CL1	6376	-26.4368	-18.64	-4.91391	6.84082e-06	3.42041e-06	0.999997	0.000774269	1	DownCRBM
ILMN_1796925	CXADR	1525	-17.1413	-7.36558	-2.51548	0.00191352	0.00095676	0.999043	0.031965	1	DownCRBM
ILMN_1748323	CXCL14	9547	-15.8921	-13.5899	-2.94874	0.000566261	0.000283131	0.999717	0.013896	1	DownCRBM
ILMN_1703279	CXORF57	55086	-19.795	-10.9692	-8.29613	0.000119591	5.97953e-05	0.99994	0.00477158	1	DownCRBM
ILMN_1771179	CYB561	1534	-25.4591	-13.5532	-3.53839	5.41018e-05	2.70509e-05	0.999973	0.00279115	1	DownCRBM
ILMN_1684321	CYB5B	80777	-24.5985	-10.6176	2.31908	0.000593708	0.000296854	0.999703	0.0143473	1	DownCRBM
ILMN_1696254	CYB5D2	124936	-23.0934	-6.69071	-2.76503	0.000621227	0.000310614	0.999689	0.0147551	1	DownCRBM
ILMN_1788131	CYP26A1	1592	-17.9382	-10.7533	1.70793	0.00196745	0.000983723	0.999016	0.0326202	1	DownCRBM
ILMN_1697433	CYP46A1	10858	-25.1673	-17.7788	1.00013	6.3803e-05	3.19015e-05	0.999968	0.00308913	1	DownCRBM
ILMN_1667487	DACH2	117154	-20.1147	-11.2863	-4.05929	0.000296608	0.000148304	0.999852	0.00890645	1	DownCRBM
ILMN_1667468	DACT3	147906	-27.0821	-12.9099	-10.4146	6.05196e-06	3.02598e-06	0.999997	0.00072181	1	DownCRBM
ILMN_1715637	DAP	1611	-16.0781	-8.58593	-3.16138	0.00158495	0.000792474	0.999208	0.0281735	1	DownCRBM
ILMN_1708340	DAPK1	1612	-24.0706	-15.5467	8.79503	0.000954023	0.000477012	0.999523	0.019725	1	DownCRBM
ILMN_1769926	DBN1	1627	-17.3115	-8.91934	-2.23359	0.00141012	0.000705059	0.999295	0.0258957	1	DownCRBM
ILMN_1698307	DBNL	28988	-26.4505	-5.91301	-1.33224	0.000505189	0.000252594	0.999747	0.0128795	1	DownCRBM
ILMN_1802456	DCTD	1635	-24.9518	-6.51738	-5.23342	0.00023808	0.00011904	0.999881	0.00763232	1	DownCRBM
ILMN_1676422	DCX	1641	-32.9556	-16.4279	-4.66371	2.32741e-06	1.16371e-06	0.999999	0.000400834	1	DownCRBM
ILMN_1690963	DDEF1	50807	-20.7737	-8.09613	-2.01551	0.000874053	0.000437027	0.999563	0.0185373	1	DownCRBM
ILMN_1685441	DDEFL1	55616	-12.5066	-5.72324	-12.8749	0.000712188	0.000356094	0.999644	0.0159588	1	DownCRBM
ILMN_1673450	DDN	23109	-31.162	-24.0047	-0.132331	1.5349e-06	7.6745e-07	0.999999	0.000327406	1	DownCRBM
ILMN_1692742	DENND3	22898	-28.8842	-17.6829	-3.72792	6.60718e-06	3.30359e-06	0.999997	0.000770562	1	DownCRBM
ILMN_1663685	DGCR6	8214	-17.7842	-5.06351	-3.99183	0.00200298	0.00100149	0.998999	0.0328169	1	DownCRBM
ILMN_1791396	DGCR6L	85359	-18.0593	-4.60143	-3.70128	0.00222413	0.00111207	0.998888	0.0353113	1	DownCRBM
ILMN_1732636	DGKB	1607	-22.122	-18.171	2.53559	0.000177299	8.86494e-05	0.999911	0.00626305	1	DownCRBM
ILMN_1744046	DIAPH2	1730	-17.275	-11.0334	3.43825	0.00302623	0.00151312	0.998487	0.0434805	1	DownCRBM
ILMN_1737650	DIO2	1734	-14.9225	-13.0576	-4.92023	0.000497605	0.000248803	0.999751	0.012747	1	DownCRBM
ILMN_1688877	DIRAS3	9077	-20.8613	-9.9567	-5.25293	0.000258504	0.000129252	0.999871	0.00812272	1	DownCRBM
ILMN_1655941	DKFZP434N035	84222	-19.8129	-1.57736	-4.13723	0.0027112	0.0013556	0.998644	0.0404202	1	DownCRBM
ILMN_1656560	DKFZP564O0823	25849	-25.8858	-20.8422	-5.36098	3.61338e-06	1.80669e-06	0.999998	0.000534395	1	DownCRBM
ILMN_1658356	DKFZP586H2123	25891	-17.1466	-11.7874	-8.57783	0.000168408	8.42041e-05	0.999916	0.00608738	1	DownCRBM
ILMN_1713139	DLGAP2	9228	-35.0501	-20.5487	-1.00684	1.10876e-06	5.54382e-07	0.999999	0.000273794	1	DownCRBM
ILMN_1736096	DLL3	10683	-21.3901	-11.6184	6.34801	0.00223619	0.00111809	0.998882	0.0353113	1	DownCRBM
ILMN_1672094	DLX1	1745	-22.2941	-17.333	2.35078	0.000200339	0.000100169	0.9999	0.00681335	1	DownCRBM
ILMN_1759598	DLX5	1749	-24.2905	-15.8199	4.8182	0.000338012	0.000169006	0.999831	0.00971303	1	DownCRBM
ILMN_1712075	DMN	23336	-15.6298	-2.7792	-10.0612	0.00135245	0.000676224	0.999324	0.0252974	1	DownCRBM
ILMN_1715203	DNAH7	56171	-20.4158	-6.75442	1.19345	0.00251706	0.00125853	0.998741	0.0384212	1	DownCRBM
ILMN_1730906	DOC1	11259	-17.7503	-9.29442	-5.11521	0.000619051	0.000309525	0.99969	0.0147551	1	DownCRBM
ILMN_1765860	DOCK11	139818	-15.1638	-3.19986	-5.55938	0.00349932	0.00174966	0.99825	0.0485181	1	DownCRBM
ILMN_1728572	DOK5	55816	-19.0854	-7.57654	2.39714	0.00350462	0.00175231	0.998248	0.0485309	1	DownCRBM
ILMN_1778425	DPP10	57628	-26.102	-17.2846	-1.19303	3.18434e-05	1.59217e-05	0.999984	0.00201832	1	DownCRBM
ILMN_1805039	DPP10	57628	-24.0455	-17.0167	0.158079	8.19439e-05	4.0972e-05	0.999959	0.00357053	1	DownCRBM
ILMN_1749324	DPYS	1807	-21.0727	-3.22964	-6.50101	0.000887055	0.000443527	0.999556	0.0187771	1	DownCRBM
ILMN_1679262	DPYSL3	1809	-21.8949	-11.1851	-12.6407	2.07975e-05	1.03988e-05	0.99999	0.00150775	1	DownCRBM
ILMN_1771622	DRD1IP	50632	-28.8948	-11.8084	-8.55877	8.8353e-06	4.41765e-06	0.999996	0.000890016	1	DownCRBM
ILMN_1689043	DRD5	1816	-19.4728	-5.82798	-4.14293	0.00117423	0.000587116	0.999413	0.0229711	1	DownCRBM
ILMN_1671809	DUSP22	56940	-19.0719	-3.00812	-4.91516	0.0019734	0.000986702	0.999013	0.0326701	1	DownCRBM
ILMN_1652143	E2F3	1871	-30.799	-20.0025	-2.71775	2.62243e-06	1.31121e-06	0.999999	0.000427764	1	DownCRBM
ILMN_1699562	EFCAB1	79645	-13.9437	-10.0031	-3.92938	0.00151472	0.000757362	0.999243	0.0273192	1	DownCRBM
ILMN_1695941	EFCBP1	64168	-20.716	-15.4688	-6.50977	4.72019e-05	2.3601e-05	0.999976	0.00253711	1	DownCRBM
ILMN_1663437	EFCBP2	54550	-25.8971	-18.2978	-3.79259	1.21326e-05	6.06628e-06	0.999994	0.00102729	1	DownCRBM
ILMN_1761463	EFHD2	79180	-18.1184	-10.7062	-6.83866	0.000271178	0.000135589	0.999864	0.00835529	1	DownCRBM
ILMN_1695606	EFNB3	1949	-28.9065	-21.5096	-3.7102	2.08131e-06	1.04065e-06	0.999999	0.000389009	1	DownCRBM
ILMN_1669898	EGFL7	51162	-18.7191	-7.19144	-3.09291	0.0012802	0.000640098	0.99936	0.0244405	1	DownCRBM
ILMN_1735151	EIF5A2	56648	-15.1506	-4.16081	-9.55003	0.00123376	0.000616878	0.999383	0.0237791	1	DownCRBM
ILMN_1772762	ELAVL4	1996	-27.9453	-9.98645	-3.20991	8.22613e-05	4.11306e-05	0.999959	0.00357053	1	DownCRBM
ILMN_1680184	EMX1	2016	-31.1997	-17.7414	4.61167	3.81795e-05	1.90897e-05	0.999981	0.00222888	1	DownCRBM
ILMN_1779147	ENC1	8507	-31.3897	-24.4908	-1.72543	7.39604e-07	3.69802e-07	1	0.000215887	1	DownCRBM
ILMN_1805448	EPB41L2	2037	-19.7825	-6.28543	-6.68337	0.000556919	0.00027846	0.999722	0.0137938	1	DownCRBM
ILMN_1671686	EPB49	2039	-28.8279	-13.0963	4.65013	0.000226168	0.000113084	0.999887	0.00729777	1	DownCRBM
ILMN_1663263	EPHA10	284656	-22.7283	-9.08269	-5.50337	0.000196756	9.8378e-05	0.999902	0.00673585	1	DownCRBM
ILMN_1668022	EPHA5	2044	-14.0844	-11.7069	1.97386	0.00356396	0.00178198	0.998218	0.0490464	1	DownCRBM
ILMN_1802646	EPHB6	2051	-29.6381	-15.2721	0.970181	4.08127e-05	2.04063e-05	0.99998	0.00233347	1	DownCRBM
ILMN_1781281	EPPB9	27077	-24.2793	-12.1836	1.22117	0.000339587	0.000169793	0.99983	0.00973307	1	DownCRBM
ILMN_1769195	ERC2	26059	-23.9987	-15.5009	3.725	0.000298821	0.00014941	0.999851	0.00892561	1	DownCRBM
ILMN_1715013	ERMAP	114625	-19.5974	-3.71652	-0.879202	0.00356194	0.00178097	0.998219	0.0490464	1	DownCRBM
ILMN_1800130	ETNK2	55224	-21.1999	-9.61898	0.860685	0.00108762	0.000543811	0.999456	0.021776	1	DownCRBM
ILMN_1745578	ETS2	2114	-27.2256	-15.2406	2.26732	0.000104827	5.24135e-05	0.999948	0.00430645	1	DownCRBM
ILMN_1789596	ETV6	2120	-23.9918	-11.5775	-3.90943	0.000117193	5.85967e-05	0.999941	0.00469281	1	DownCRBM
ILMN_1718783	EXTL1	2134	-31.5898	-18.8962	-1.29959	4.52496e-06	2.26248e-06	0.999998	0.000611839	1	DownCRBM
ILMN_1671766	F12	2161	-13.4307	-11.234	-6.46097	0.000728498	0.000364249	0.999636	0.0162586	1	DownCRBM
ILMN_1675083	F8	2157	-26.1943	-7.51593	1.98647	0.000796171	0.000398086	0.999602	0.0174528	1	DownCRBM
ILMN_1790249	F8A1	8263	-21.7448	-4.91802	0.745276	0.00259672	0.00129836	0.998702	0.039402	1	DownCRBM
ILMN_1721559	FABP6	2172	-13.2755	-2.25761	-12.4183	0.00145247	0.000726233	0.999274	0.0263715	1	DownCRBM
ILMN_1712431	FAM113B	91523	-22.1526	-10.8139	-6.94813	0.000100638	5.03191e-05	0.99995	0.00416522	1	DownCRBM
ILMN_1702199	FAM19A1	407738	-19.7403	-15.8411	-7.40586	4.27247e-05	2.13624e-05	0.999979	0.00238142	1	DownCRBM
ILMN_1691876	FAM19A2	338811	-14.004	-12.2963	-4.63974	0.000769662	0.000384831	0.999615	0.0170062	1	DownCRBM
ILMN_1770623	FAM58A	92002	-22.2604	-0.72332	-1.51408	0.00347846	0.00173923	0.998261	0.0483355	1	DownCRBM
ILMN_1778844	FAM5B	57795	-36.8921	-21.6686	-4.28678	1.48095e-07	7.40476e-08	1	0.000122969	1	DownCRBM
ILMN_1727479	FAM79A	127262	-25.1261	-6.4968	1.63481	0.00115157	0.000575786	0.999424	0.0228094	1	DownCRBM
ILMN_1699623	FAM81A	145773	-26.5071	-12.1839	-2.73121	7.4488e-05	3.7244e-05	0.999963	0.00337233	1	DownCRBM
ILMN_1751328	FAM83H	286077	-27.9302	-12.3485	2.63192	0.000202215	0.000101107	0.999899	0.00681753	1	DownCRBM
ILMN_1741468	FAP	2191	-23.6119	-12.5612	-0.938631	0.00021214	0.00010607	0.999894	0.00700316	1	DownCRBM
ILMN_1678353	FARP1	10160	-19.3698	-13.8776	-1.58766	0.000342001	0.000171	0.999829	0.00975352	1	DownCRBM
ILMN_1688639	FBXL2	25827	-26.9503	-16.4514	-2.70803	2.114e-05	1.057e-05	0.999989	0.00152263	1	DownCRBM
ILMN_1703955	FBXO32	114907	-14.1134	-5.39905	-10.1913	0.0010068	0.000503398	0.999497	0.020604	1	DownCRBM
ILMN_1750706	FEZF2	55079	-23.3064	-16.2179	5.8393	0.000487197	0.000243598	0.999756	0.0125967	1	DownCRBM
ILMN_1772686	FGD3	89846	-16.5057	-7.36107	-6.40152	0.000929118	0.000464559	0.999535	0.0193718	1	DownCRBM
ILMN_1671777	FGF13	2258	-27.2061	-21.553	-5.0565	2.19814e-06	1.09907e-06	0.999999	0.000393255	1	DownCRBM
ILMN_1668411	FHL2	2274	-23.9037	-20.1952	5.74855	0.00015892	7.94599e-05	0.999921	0.00587579	1	DownCRBM
ILMN_1703558	FHL3	2275	-23.8557	-4.41384	-2.94148	0.000852431	0.000426216	0.999574	0.0182707	1	DownCRBM
ILMN_1761322	FHOD3	80206	-33.0023	-18.5047	-8.86808	3.05104e-07	1.52552e-07	1	0.000150495	1	DownCRBM
ILMN_1657039	FILIP1	27145	-17.9432	-12.7163	4.50083	0.00234977	0.00117488	0.998825	0.0366577	1	DownCRBM
ILMN_1738578	FILIP1L	11259	-17.2143	-8.93818	-5.73394	0.000652571	0.000326285	0.999674	0.0151883	1	DownCRBM
ILMN_1698038	FLJ22374	84182	-27.2159	-5.39637	-0.611037	0.000571845	0.000285923	0.999714	0.0139712	1	DownCRBM
ILMN_1760503	FLJ23049	79740	-24.1166	-7.53319	-1.41144	0.000562943	0.000281472	0.999719	0.0138727	1	DownCRBM
ILMN_1705466	FLJ30058	158763	-14.957	-5.66572	-3.34698	0.00346932	0.00173466	0.998265	0.0483355	1	DownCRBM
ILMN_1717029	FLJ33590	285093	-21.1715	-13.9324	-5.88204	7.49897e-05	3.74948e-05	0.999963	0.00338124	1	DownCRBM
ILMN_1693471	FLJ33790	283212	-17.1989	-4.79393	-5.46355	0.00173765	0.000868823	0.999131	0.0301162	1	DownCRBM
ILMN_1659975	FLJ38984	127703	-21.2293	-12.9972	-2.0832	0.000247062	0.000123531	0.999876	0.00782974	1	DownCRBM
ILMN_1803559	FLJ39632	642477	-12.3648	-7.13195	-5.28779	0.00282285	0.00141142	0.998589	0.0412572	1	DownCRBM
ILMN_1769615	FLRT2	23768	-32.998	-26.056	-1.31621	3.12061e-07	1.56031e-07	1	0.000150495	1	DownCRBM
ILMN_1806667	FRAS1	80144	-25.6992	-13.7863	-4.73317	3.45828e-05	1.72914e-05	0.999983	0.00211929	1	DownCRBM
ILMN_1671318	FRAS1	80144	-20.8472	-6.89345	2.28858	0.00282685	0.00141343	0.998587	0.0412572	1	DownCRBM
ILMN_1658081	FRMPD2	143162	-16.8634	-13.0161	1.90552	0.00156826	0.000784128	0.999216	0.0279215	1	DownCRBM
ILMN_1808707	FSCN1	6624	-28.8823	-12.5612	-6.89622	1.15768e-05	5.7884e-06	0.999994	0.000999915	1	DownCRBM
ILMN_1683146	FTH1	2495	-14.3984	-8.43637	-9.14301	0.000605932	0.000302966	0.999697	0.0145476	1	DownCRBM
ILMN_1786118	FXYD7	53822	-31.147	-19.3216	-0.0632936	6.52373e-06	3.26187e-06	0.999997	0.0007698	1	DownCRBM
ILMN_1707571	GABRA5	2558	-19.5505	-15.8839	-0.85533	0.000241651	0.000120826	0.999879	0.00768514	1	DownCRBM
ILMN_1670926	GALNAC4S-6ST	51363	-25.6553	-17.3097	-0.304083	4.51349e-05	2.25674e-05	0.999977	0.0024541	1	DownCRBM
ILMN_1738212	GALNTL5	168391	-19.865	-14.2103	8.28548	0.00262673	0.00131336	0.998687	0.0397485	1	DownCRBM
ILMN_1755123	GBA	2629	-23.7213	-5.61856	-1.2135	0.000988543	0.000494272	0.999506	0.0202819	1	DownCRBM
ILMN_1656300	GFRA2	2675	-29.7765	-12.3617	0.147666	6.86928e-05	3.43464e-05	0.999966	0.00319838	1	DownCRBM
ILMN_1769245	GLIPR1	11010	-15.8182	-6.00656	-3.8728	0.00246842	0.00123421	0.998766	0.0378867	1	DownCRBM
ILMN_1680727	GLRX2	51022	-16.9401	-5.9578	-5.82064	0.00131808	0.00065904	0.999341	0.0249397	1	DownCRBM
ILMN_1802654	GLT8D2	83468	-24.4459	-11.9632	2.47609	0.00046553	0.000232765	0.999767	0.0122362	1	DownCRBM
ILMN_1713756	GLUD1	2746	-14.1135	-6.49451	-4.56095	0.00268058	0.00134029	0.99866	0.0402341	1	DownCRBM
ILMN_1711617	GMFG	9535	-15.3018	-6.46356	-6.17793	0.00151858	0.000759292	0.999241	0.0273444	1	DownCRBM
ILMN_1653894	GMIP	51291	-17.3562	-5.90541	-0.89364	0.00347478	0.00173739	0.998263	0.0483355	1	DownCRBM
ILMN_1734857	GNA14	9630	-20.209	-7.25348	-1.25365	0.00139954	0.000699769	0.9993	0.0258298	1	DownCRBM
ILMN_1746027	GNAL	2774	-14.9328	-10.7874	-5.43855	0.000742498	0.000371249	0.999629	0.0165377	1	DownCRBM
ILMN_1807925	GNG2	54331	-19.9987	-13.7232	7.33709	0.00232344	0.00116172	0.998838	0.0363079	1	DownCRBM
ILMN_1694837	GPATCH4	54865	-21.1036	-7.52431	1.24172	0.00189465	0.000947326	0.999053	0.0317455	1	DownCRBM
ILMN_1789502	GPC4	2239	-15.6798	-9.00564	-1.5054	0.00223267	0.00111633	0.998884	0.0353113	1	DownCRBM
ILMN_1688886	GPC5	2262	-15.2016	-9.28428	-11.2533	0.000250667	0.000125334	0.999875	0.00792138	1	DownCRBM
ILMN_1801205	GPNMB	10457	-15.6016	-11.2902	-0.399931	0.00177206	0.000886031	0.999114	0.0303798	1	DownCRBM
ILMN_1728785	GPR116	221395	-15.9336	-6.04649	-3.39131	0.00264688	0.00132344	0.998677	0.0399445	1	DownCRBM
ILMN_1660549	GPR177	79971	-18.2351	-7.57427	-1.72177	0.00174927	0.000874634	0.999125	0.0301405	1	DownCRBM
ILMN_1671260	GPR177	79971	-18.5806	-9.48489	1.51037	0.00217284	0.00108642	0.998914	0.0347572	1	DownCRBM
ILMN_1812946	GPR88	54112	-20.0862	-17.2711	-0.772313	0.000154633	7.73164e-05	0.999923	0.00575566	1	DownCRBM
ILMN_1749662	GPX1	2876	-17.4583	-4.47044	-3.33074	0.00277035	0.00138518	0.998615	0.0410832	1	DownCRBM
ILMN_1661443	GRAMD2	196996	-18.8939	-5.53809	-1.07181	0.00270191	0.00135096	0.998649	0.040336	1	DownCRBM
ILMN_1705210	GRASP	160622	-18.5509	-12.0728	2.32736	0.00150312	0.000751559	0.999248	0.027154	1	DownCRBM
ILMN_1678816	GREM2	64388	-20.9465	-7.66521	0.0615817	0.00147093	0.000735465	0.999265	0.0266594	1	DownCRBM
ILMN_1651817	GRIK1	2897	-16.8062	-9.0786	-7.54657	0.000451259	0.00022563	0.999774	0.0119793	1	DownCRBM
ILMN_1758400	GRIN3A	116443	-20.1549	-14.4593	-5.76497	8.6206e-05	4.3103e-05	0.999957	0.00369188	1	DownCRBM
ILMN_1693604	GRM2	2912	-19.8275	-8.3494	-0.0496965	0.00154962	0.000774812	0.999225	0.0277681	1	DownCRBM
ILMN_1729212	GRM8	2918	-21.7154	-11.3951	-10.0077	4.26032e-05	2.13016e-05	0.999979	0.00238142	1	DownCRBM
ILMN_1725241	GSTK1	373156	-29.1677	-6.71867	-6.51528	6.00246e-05	3.00123e-05	0.99997	0.00298562	1	DownCRBM
ILMN_1740234	GSTO2	119391	-26.9168	-13.7697	-4.14994	2.99553e-05	1.49776e-05	0.999985	0.00193881	1	DownCRBM
ILMN_1762167	GTDC1	79712	-29.1116	-10.6044	2.69895	0.000241118	0.000120559	0.999879	0.00768514	1	DownCRBM
ILMN_1808590	GUCY1A3	2982	-23.8187	-16.2468	0.224453	0.000107425	5.37123e-05	0.999946	0.00439688	1	DownCRBM
ILMN_1758398	GUK1	2987	-26.4069	-10.8288	2.99168	0.000447804	0.000223902	0.999776	0.01194	1	DownCRBM
ILMN_1802690	GULP1	51454	-16.8615	-5.93357	-2.42375	0.00277336	0.00138668	0.998613	0.0410832	1	DownCRBM
ILMN_1792384	HABP4	22927	-26.0073	-7.67485	-4.4475	0.000170734	8.53669e-05	0.999915	0.00614801	1	DownCRBM
ILMN_1678812	HAPLN1	1404	-17.5617	-9.62233	1.21416	0.00241584	0.00120792	0.998792	0.0373731	1	DownCRBM
ILMN_1696183	HBQ1	3049	-20.64	-16.179	-4.08786	7.60945e-05	3.80472e-05	0.999962	0.00341717	1	DownCRBM
ILMN_1684690	HDAC11	79885	-22.9803	-3.64973	-7.05266	0.000472643	0.000236322	0.999764	0.0123354	1	DownCRBM
ILMN_1654639	HERC6	55008	-25.8728	-15.1829	-8.90985	6.74277e-06	3.37139e-06	0.999997	0.000771039	1	DownCRBM
ILMN_1653466	HES4	57801	-19.0264	-14.3053	-9.62704	4.22488e-05	2.11244e-05	0.999979	0.00238142	1	DownCRBM
ILMN_1733519	HMGB3	3149	-22.7202	-5.95366	-2.50702	0.000843289	0.000421645	0.999578	0.0182243	1	DownCRBM
ILMN_1797728	HMGCS1	3157	-23.1094	-10.4586	-10.7992	3.11201e-05	1.556e-05	0.999984	0.00199528	1	DownCRBM
ILMN_1671486	HOMER2	9455	-22.6078	-6.11889	3.68096	0.00315815	0.00157908	0.998421	0.0449682	1	DownCRBM
ILMN_1653751	HOP	84525	-17.3793	-11.0615	-3.26883	0.000684597	0.000342298	0.999658	0.0156072	1	DownCRBM
ILMN_1815033	HPCA	3208	-25.3864	-12.4072	7.80309	0.00116898	0.00058449	0.999416	0.0229492	1	DownCRBM
ILMN_1655867	HRASLS	57110	-26.5046	-18.0035	-8.77848	2.52201e-06	1.261e-06	0.999999	0.000417524	1	DownCRBM
ILMN_1787552	HRH1	3269	-29.1328	-22.5769	3.70608	1.31438e-05	6.57192e-06	0.999993	0.001088	1	DownCRBM
ILMN_1668830	HRK	8739	-27.9458	-16.9153	-0.320693	2.80493e-05	1.40247e-05	0.999986	0.00185732	1	DownCRBM
ILMN_1712475	HS3ST2	9956	-12.4987	-11.7957	-2.13373	0.00202269	0.00101135	0.998989	0.0329453	1	DownCRBM
ILMN_1708987	HSD11B1L	374875	-23.9789	-10.774	1.78449	0.000577422	0.000288711	0.999711	0.0140455	1	DownCRBM
ILMN_1720710	HSPB3	8988	-20.8907	-9.78114	-4.50515	0.000321567	0.000160783	0.999839	0.00938636	1	DownCRBM
ILMN_1791280	HSPB8	26353	-19.3129	-8.31957	-13.2677	7.28559e-05	3.64279e-05	0.999964	0.00332559	1	DownCRBM
ILMN_1712888	HSPH1	10808	-17.7407	-7.55095	-0.244853	0.00264224	0.00132112	0.998679	0.0399288	1	DownCRBM
ILMN_1715496	HTR2A	3356	-25.8146	-14.5467	-1.19224	7.12741e-05	3.5637e-05	0.999964	0.00326683	1	DownCRBM
ILMN_1767145	HTR2C	3358	-11.1865	-9.19355	-6.28891	0.00187068	0.000935339	0.999065	0.0314864	1	DownCRBM
ILMN_1808258	HTR4	3360	-24.0631	-17.6293	3.40156	0.000160975	8.04875e-05	0.99992	0.00589285	1	DownCRBM
ILMN_1802524	ICAM5	7087	-31.2878	-20.1914	2.22111	9.54659e-06	4.7733e-06	0.999995	0.000912852	1	DownCRBM
ILMN_1751753	IDH2	3418	-15.2213	-5.80294	-4.04522	0.0027834	0.0013917	0.998608	0.0411098	1	DownCRBM
ILMN_1758626	IDS	3423	-29.7961	-16.4816	0.0495607	2.1797e-05	1.08985e-05	0.999989	0.00154982	1	DownCRBM
ILMN_1701789	IFIT3	3437	-14.8972	-6.53122	-6.57308	0.0014892	0.0007446	0.999255	0.0269465	1	DownCRBM
ILMN_1764964	IFNGR2	3460	-27.7226	-13.0902	5.31902	0.000342059	0.00017103	0.999829	0.00975352	1	DownCRBM
ILMN_1725193	IGFBP2	3485	-22.5015	-7.85812	-2.13968	0.000623019	0.000311509	0.999688	0.0147661	1	DownCRBM
ILMN_1753502	IGSF11	152404	-14.9971	-4.40818	-6.93963	0.00211945	0.00105972	0.99894	0.03417	1	DownCRBM
ILMN_1743455	IL12RB2	3595	-23.0833	-11.4562	5.29372	0.00132054	0.000660271	0.99934	0.0249397	1	DownCRBM
ILMN_1661347	IMP4	92856	-27.3396	-5.20403	-0.555841	0.000589712	0.000294856	0.999705	0.0142818	1	DownCRBM
ILMN_1795388	INSM2	84684	-20.7187	-7.88482	-7.45324	0.000257585	0.000128793	0.999871	0.00811687	1	DownCRBM
ILMN_1654598	IQCA	79781	-21.0369	-9.76924	-0.707532	0.000763721	0.000381861	0.999618	0.0169086	1	DownCRBM
ILMN_1735432	ISCU	23479	-18.5918	-1.93257	-3.74132	0.00344319	0.00172159	0.998278	0.0481006	1	DownCRBM
ILMN_1813289	ISG15	9636	-17.0375	-12.3899	-10.2978	9.54048e-05	4.77024e-05	0.999952	0.00399332	1	DownCRBM
ILMN_1692739	ISLR2	57611	-23.7275	-16.7234	7.33778	0.000562129	0.000281065	0.999719	0.0138727	1	DownCRBM
ILMN_1698121	ISOC1	51015	-18.6761	-8.94315	-6.73775	0.000374884	0.000187442	0.999813	0.0105005	1	DownCRBM
ILMN_1680453	ITM2C	81618	-28.4966	-22.1305	-7.54813	5.66402e-07	2.83201e-07	1	0.000189833	1	DownCRBM
ILMN_1776516	ITPKA	3706	-28.9093	-17.3185	11.339	0.000408028	0.000204014	0.999796	0.0112864	1	DownCRBM
ILMN_1750373	KAL1	3730	-18.753	-9.60361	-3.29399	0.000709674	0.000354837	0.999645	0.0159453	1	DownCRBM
ILMN_1707798	KALRN	8997	-28.7399	-20.0506	6.03204	5.56948e-05	2.78474e-05	0.999972	0.00284685	1	DownCRBM
ILMN_1735735	KATNB1	10300	-30.5553	-8.49377	13.4144	0.00320009	0.00160005	0.9984	0.0453998	1	DownCRBM
ILMN_1651900	KCNA4	3739	-17.4798	-8.48816	-1.54607	0.00173596	0.00086798	0.999132	0.0301162	1	DownCRBM
ILMN_1790508	KCNA5	3741	-16.5763	-6.69631	-8.30579	0.000689463	0.000344731	0.999655	0.0156072	1	DownCRBM
ILMN_1711092	KCNB1	3745	-25.8577	-12.2156	5.63912	0.000678504	0.000339252	0.999661	0.0155817	1	DownCRBM
ILMN_1668236	KCNB2	9312	-28.5733	-16.6286	1.50366	4.27237e-05	2.13618e-05	0.999979	0.00238142	1	DownCRBM
ILMN_1692156	KCNC2	3747	-15.1416	-11.5088	-5.16986	0.00064095	0.000320475	0.99968	0.0149672	1	DownCRBM
ILMN_1657440	KCNC2	3747	-15.2695	-8.65394	-1.02911	0.00286758	0.00143379	0.998566	0.0416325	1	DownCRBM
ILMN_1671392	KCNF1	3754	-25.7251	-22.1942	1.71176	2.02783e-05	1.01391e-05	0.99999	0.00149019	1	DownCRBM
ILMN_1704063	KCNH3	23416	-31.0951	-17.7166	5.33543	4.80345e-05	2.40172e-05	0.999976	0.00255583	1	DownCRBM
ILMN_1744403	KCNIP3	30818	-29.4817	-18.8133	-1.2263	8.44464e-06	4.22232e-06	0.999996	0.00088366	1	DownCRBM
ILMN_1800179	KCNJ4	3761	-22.1743	-17.7166	2.40224	0.000189679	9.48397e-05	0.999905	0.00657476	1	DownCRBM
ILMN_1765990	KCNK2	3776	-21.7715	-9.30991	5.13931	0.00260441	0.0013022	0.998698	0.0394646	1	DownCRBM
ILMN_1721027	KCNK4	50801	-30.7204	-18.0662	5.80929	5.45471e-05	2.72736e-05	0.999973	0.00280109	1	DownCRBM
ILMN_1740508	KCNMA1	3778	-25.529	-9.96531	7.90652	0.00196515	0.000982576	0.999017	0.0326202	1	DownCRBM
ILMN_1664125	KCNN1	3780	-20.9718	-13.113	2.18524	0.000702728	0.000351364	0.999649	0.0158751	1	DownCRBM
ILMN_1775004	KCNQ3	3786	-28.607	-13.1708	-1.70649	4.49602e-05	2.24801e-05	0.999978	0.0024541	1	DownCRBM
ILMN_1761903	KCNS1	3787	-22.0343	-11.0623	-0.410997	0.000491002	0.000245501	0.999754	0.0126362	1	DownCRBM
ILMN_1770383	KCNS3	3790	-16.5529	-4.27879	-9.72989	0.000865273	0.000432637	0.999567	0.0184569	1	DownCRBM
ILMN_1736303	KCNV1	27012	-21.3673	-16.6648	3.08982	0.000348271	0.000174136	0.999826	0.00987986	1	DownCRBM
ILMN_1793378	KCTD16	57528	-23.8808	-16.4982	7.75452	0.000631281	0.00031564	0.999684	0.0148351	1	DownCRBM
ILMN_1740740	KCTD17	79734	-30.5103	-12.6596	0.635869	6.04137e-05	3.02068e-05	0.99997	0.00299156	1	DownCRBM
ILMN_1658237	KHDRBS2	202559	-26.5341	-17.8204	1.1877	4.73477e-05	2.36739e-05	0.999976	0.00253711	1	DownCRBM
ILMN_1691747	KHDRBS3	10656	-32.2128	-15.7985	4.8474	5.32954e-05	2.66477e-05	0.999973	0.00277536	1	DownCRBM
ILMN_1800889	KIAA0274	9896	-25.3215	-5.03568	-1.22062	0.000806333	0.000403167	0.999597	0.017606	1	DownCRBM
ILMN_1677968	KIAA0649	9858	-21.8042	-12.4985	-2.40348	0.000226328	0.000113164	0.999887	0.00729777	1	DownCRBM
ILMN_1706960	KIAA1217	56243	-20.7874	-9.58787	-0.239	0.000932062	0.000466031	0.999534	0.0193967	1	DownCRBM
ILMN_1771482	KIAA1324	57535	-26.623	-15.3672	-6.17721	1.1629e-05	5.81451e-06	0.999994	0.000999915	1	DownCRBM
ILMN_1700384	KIAA1522	57648	-27.2879	-15.2845	4.53466	0.000182151	9.10755e-05	0.999909	0.00635352	1	DownCRBM
ILMN_1717923	KIAA1906	114795	-22.4196	-15.1499	5.05987	0.000629403	0.000314702	0.999685	0.0148224	1	DownCRBM
ILMN_1778400	KIAA1913	114801	-15.8325	-13.5339	-3.74684	0.000481876	0.000240938	0.999759	0.0124882	1	DownCRBM
ILMN_1666625	KIF17	57576	-30.9105	-16.1657	1.85731	2.9592e-05	1.4796e-05	0.999985	0.00193079	1	DownCRBM
ILMN_1812254	KIF5A	3798	-16.4659	-10.3117	0.80523	0.00237371	0.00118685	0.998813	0.0369791	1	DownCRBM
ILMN_1673521	KISS1R	84634	-8.86353	-3.65246	-10.8603	0.00353355	0.00176677	0.998233	0.0487489	1	DownCRBM
ILMN_1701837	KLHL2	11275	-23.4529	-11.899	2.17515	0.00054584	0.00027292	0.999727	0.0136669	1	DownCRBM
ILMN_1701700	KLHL4	56062	-23.3633	-7.62504	-3.26725	0.000418876	0.000209438	0.999791	0.0114096	1	DownCRBM
ILMN_1745570	KLK7	5650	-16.555	-10.5364	-1.73589	0.0012891	0.000644551	0.999355	0.0245261	1	DownCRBM
ILMN_1718663	LCP2	3937	-28.3075	-10.4633	-11.7767	5.93812e-06	2.96906e-06	0.999997	0.000715931	1	DownCRBM
ILMN_1800697	LDB2	9079	-33.5214	-23.2609	-1.92219	5.44735e-07	2.72367e-07	1	0.000189833	1	DownCRBM
ILMN_1722218	LENG4	79143	-26.7932	-11.1094	-4.1026	6.40552e-05	3.20276e-05	0.999968	0.00308913	1	DownCRBM
ILMN_1657373	LEPREL1	55214	-12.9368	-4.74084	-9.53016	0.00170372	0.000851862	0.999148	0.0297602	1	DownCRBM
ILMN_1723978	LGALS1	3956	-14.0241	-2.56024	-12.9202	0.00104544	0.000522718	0.999477	0.021122	1	DownCRBM
ILMN_1737162	LGI3	203190	-24.3295	-3.45369	-12.2157	0.000101373	5.06864e-05	0.999949	0.00418003	1	DownCRBM
ILMN_1788291	LHFPL5	222662	-22.5103	-9.53483	3.89946	0.00165509	0.000827546	0.999172	0.029002	1	DownCRBM
ILMN_1807016	LHX2	9355	-22.827	-19.5799	0.202523	5.6881e-05	2.84405e-05	0.999972	0.00289294	1	DownCRBM
ILMN_1715189	LHX6	26468	-31.9508	-21.8004	-0.206699	2.36668e-06	1.18334e-06	0.999999	0.000400834	1	DownCRBM
ILMN_1776708	LIMK1	3984	-18.8172	-5.56884	-7.41685	0.000680746	0.000340373	0.99966	0.0156009	1	DownCRBM
ILMN_1756755	LINGO1	84894	-25.2092	-16.5929	4.6825	0.000220367	0.000110183	0.99989	0.00718914	1	DownCRBM
ILMN_1662917	LMO1	4004	-16.928	-6.60459	-2.70294	0.00224907	0.00112453	0.998875	0.0354356	1	DownCRBM
ILMN_1813295	LMO3	55885	-35.6021	-23.8617	-5.03999	8.11053e-08	4.05527e-08	1	0.000112453	1	DownCRBM
ILMN_1764231	LMO3	55885	-16.2477	-12.6887	2.15167	0.00200126	0.00100063	0.998999	0.0328169	1	DownCRBM
ILMN_1703487	LMO4	8543	-32.0625	-21.6143	4.77823	1.08306e-05	5.41529e-06	0.999995	0.000992833	1	DownCRBM
ILMN_1770128	LOC285016	285016	-15.5964	-8.16011	-2.97453	0.001986	0.000993001	0.999007	0.0326836	1	DownCRBM
ILMN_1810376	LOC399947	399947	-25.2057	-16.3141	-3.93775	2.44062e-05	1.22031e-05	0.999988	0.00166082	1	DownCRBM
ILMN_1797526	LOC400120	400120	-15.7256	-10.3937	-0.306315	0.00213171	0.00106586	0.998934	0.0342681	1	DownCRBM
ILMN_1652797	LOC400451	400451	-21.2454	-3.70281	-0.600121	0.00277419	0.0013871	0.998613	0.0410832	1	DownCRBM
ILMN_1707137	LOC400566	400566	-26.5715	-9.29661	-3.09607	0.000140256	7.01281e-05	0.99993	0.00532782	1	DownCRBM
ILMN_1713803	LOC400566	400566	-23.7131	-3.88746	0.808641	0.00223117	0.00111559	0.998884	0.0353113	1	DownCRBM
ILMN_1680774	LOC728392	728392	-30.3363	-17.4066	-6.5293	2.03894e-06	1.01947e-06	0.999999	0.000389009	1	DownCRBM
ILMN_1793636	LOC89944	89944	-17.7683	-2.10424	-6.50284	0.00219744	0.00109872	0.998901	0.0350201	1	DownCRBM
ILMN_1734445	LOC91461	91461	-23.5382	-14.3691	8.76203	0.00136798	0.000683992	0.999316	0.0254592	1	DownCRBM
ILMN_1764769	LOH11CR2A	4013	-24.7308	-16.2633	-16.9999	5.36089e-07	2.68044e-07	1	0.000189833	1	DownCRBM
ILMN_1682996	LOH11CR2A	4013	-24.9943	-8.93697	-8.57857	5.35991e-05	2.67996e-05	0.999973	0.00277814	1	DownCRBM
ILMN_1697548	LPHN2	23266	-26.9715	-23.7722	-0.22562	5.24148e-06	2.62074e-06	0.999997	0.000668258	1	DownCRBM
ILMN_1662482	LPPR4	9890	-21.6136	-15.6207	6.46047	0.000923013	0.000461506	0.999538	0.0193171	1	DownCRBM
ILMN_1738639	LRFN5	145581	-28.5628	-15.208	-4.58107	1.15249e-05	5.76245e-06	0.999994	0.000999915	1	DownCRBM
ILMN_1804419	LRMP	4033	-24.5545	-15.1207	-5.84156	2.35923e-05	1.17962e-05	0.999988	0.00161535	1	DownCRBM
ILMN_1718633	LRP5L	91355	-15.3519	-2.44725	-9.36906	0.00178345	0.000891724	0.999108	0.0304808	1	DownCRBM
ILMN_1663037	LRRC4C	57689	-26.2769	-18.8858	-4.26778	8.04678e-06	4.02339e-06	0.999996	0.000850502	1	DownCRBM
ILMN_1776967	LRRC50	123872	-22.2286	-11.2601	-4.22657	0.000176985	8.84924e-05	0.999912	0.00626305	1	DownCRBM
ILMN_1739683	LRRC6	23639	-29.9095	-13.7519	2.27837	8.11174e-05	4.05587e-05	0.999959	0.00356442	1	DownCRBM
ILMN_1658685	LRRC62	114794	-29.8403	-18.9204	-9.14185	6.35581e-07	3.1779e-07	1	0.000190537	1	DownCRBM
ILMN_1810593	LRRC7	57554	-23.7138	-15.5825	6.15562	0.000557123	0.000278561	0.999721	0.0137938	1	DownCRBM
ILMN_1765855	LRRC8C	84230	-15.1359	-4.42468	-5.71491	0.00265718	0.00132859	0.998671	0.039991	1	DownCRBM
ILMN_1685472	LRRTM4	80059	-21.1865	-16.8382	-0.276149	0.000151251	7.56257e-05	0.999924	0.00566784	1	DownCRBM
ILMN_1665219	LTBP4	8425	-10.8606	-9.45479	-7.19773	0.00155218	0.000776091	0.999224	0.0277691	1	DownCRBM
ILMN_1664366	LUZP1	7798	-19.2083	-2.742	-4.27854	0.00232407	0.00116203	0.998838	0.0363079	1	DownCRBM
ILMN_1677261	LZTS1	11178	-23.2971	-13.4203	-0.248771	0.000218975	0.000109488	0.999891	0.00716482	1	DownCRBM
ILMN_1764709	MAFB	9935	-20.0664	-12.4296	1.21356	0.000795032	0.000397516	0.999602	0.0174528	1	DownCRBM
ILMN_1684447	MAMDC1	161357	-21.4145	-8.59989	-3.77016	0.000452359	0.00022618	0.999774	0.0119793	1	DownCRBM
ILMN_1768510	MAN2B2	23324	-32.8674	-23.6508	-13.8438	9.04056e-09	4.52028e-09	1	3.84504e-05	1	DownCRBM
ILMN_1663640	MAOA	4128	-19.2878	-11.5474	-5.99641	0.000208317	0.000104158	0.999896	0.00693801	1	DownCRBM
ILMN_1727360	MAOB	4129	-17.5472	-9.50913	-5.94145	0.000507337	0.000253668	0.999746	0.0128795	1	DownCRBM
ILMN_1772366	MAP1A	4130	-19.6059	-6.14345	-2.46985	0.00154	0.000770002	0.99923	0.0276403	1	DownCRBM
ILMN_1774132	MAP6	4135	-20.6595	-7.24885	-4.41199	0.000626922	0.000313461	0.999687	0.0148224	1	DownCRBM
ILMN_1748281	MAPK10	5602	-28.5094	-15.4095	0.846621	5.04071e-05	2.52036e-05	0.999975	0.00264368	1	DownCRBM
ILMN_1672660	MBP	4155	-24.3696	-15.9583	-8.51936	9.06706e-06	4.53353e-06	0.999995	0.000890016	1	DownCRBM
ILMN_1752750	MCF2	4168	-17.9549	-3.50462	-9.04032	0.000898591	0.000449296	0.999551	0.018949	1	DownCRBM
ILMN_1736042	ME1	4199	-22.0862	-7.01801	2.9943	0.00251823	0.00125911	0.998741	0.0384212	1	DownCRBM
ILMN_1742544	MEF2C	4208	-26.9973	-17.8404	3.66062	8.12846e-05	4.06423e-05	0.999959	0.00356442	1	DownCRBM
ILMN_1779997	MEIS3	56917	-23.9942	-13.2492	9.53986	0.00187892	0.000939459	0.999061	0.0315772	1	DownCRBM
ILMN_1704904	MGAT4C	25834	-22.7664	-4.46257	1.74311	0.00288504	0.00144252	0.998557	0.0418117	1	DownCRBM
ILMN_1744628	MGC19604	112812	-28.9829	-11.5186	-3.82516	3.58882e-05	1.79441e-05	0.999982	0.00215174	1	DownCRBM
ILMN_1690304	MGC26718	440482	-19.6232	-12.3428	-4.92324	0.000207061	0.000103531	0.999896	0.00691784	1	DownCRBM
ILMN_1688126	MGC33657	200373	-24.0118	-4.55363	-2.20821	0.000943834	0.000471917	0.999528	0.0195682	1	DownCRBM
ILMN_1789995	MGC39606	399668	-24.3944	-9.37173	-1.50182	0.000336286	0.000168143	0.999832	0.00971303	1	DownCRBM
ILMN_1811849	MGC42090	256130	-19.8474	-8.87806	1.6335	0.00197928	0.000989639	0.99901	0.0326739	1	DownCRBM
ILMN_1652072	MGC42105	167359	-30.6443	-14.1051	8.88492	0.000331552	0.000165776	0.999834	0.00960203	1	DownCRBM
ILMN_1795245	MGC42367	343990	-32.757	-26.8494	6.09568	2.80798e-06	1.40399e-06	0.999999	0.000444944	1	DownCRBM
ILMN_1690807	MKL2	57496	-21.4526	-16.9953	8.90535	0.00121444	0.000607218	0.999393	0.0235499	1	DownCRBM
ILMN_1681780	MKX	283078	-20.8432	-13.1619	-8.90728	4.43868e-05	2.21934e-05	0.999978	0.00243732	1	DownCRBM
ILMN_1733937	MMD	23531	-21.663	-17.2028	1.76817	0.000206792	0.000103396	0.999897	0.00691784	1	DownCRBM
ILMN_1665775	MOSC2	54996	-29.7743	-16.5355	4.20549	6.72648e-05	3.36324e-05	0.999966	0.00317646	1	DownCRBM
ILMN_1687501	MOXD1	26002	-17.1846	-14.3465	2.22275	0.0011805	0.000590248	0.99941	0.0230124	1	DownCRBM
ILMN_1776640	MPL	4352	-16.7692	-5.98089	-3.95424	0.00202949	0.00101474	0.998985	0.0329591	1	DownCRBM
ILMN_1676047	MPND	84954	-25.9348	-8.20379	-0.348658	0.000416707	0.000208354	0.999792	0.011388	1	DownCRBM
ILMN_1676526	MPPED2	744	-21.5612	-8.46787	-0.187083	0.0010312	0.000515602	0.999484	0.0209489	1	DownCRBM
ILMN_1689800	MRTO4	51154	-27.5332	-9.44858	4.63525	0.000710151	0.000355076	0.999645	0.0159453	1	DownCRBM
ILMN_1715401	MT1G	4495	-8.62146	-7.75994	-8.86868	0.00241149	0.00120574	0.998794	0.0373579	1	DownCRBM
ILMN_1703006	MTCH1	23787	-26.6551	-5.66253	3.17902	0.00142364	0.00071182	0.999288	0.0260578	1	DownCRBM
ILMN_1769996	MUM1L1	139221	-19.8331	-16.2657	-7.90107	3.2476e-05	1.6238e-05	0.999984	0.00203516	1	DownCRBM
ILMN_1662358	MX1	4599	-17.9639	-6.30787	-16.301	7.68688e-05	3.84344e-05	0.999962	0.00343468	1	DownCRBM
ILMN_1743836	MXRA7	439921	-24.7297	-1.69522	0.397225	0.00265169	0.00132584	0.998674	0.0399627	1	DownCRBM
ILMN_1752075	MYBPC1	4604	-13.4612	-7.63464	-10.639	0.000629061	0.00031453	0.999685	0.0148224	1	DownCRBM
ILMN_1731215	MYBPHL	343263	-20.0548	-9.5683	-3.38633	0.000530334	0.000265167	0.999735	0.0133997	1	DownCRBM
ILMN_1669714	MYH7	4625	-19.431	-9.24574	2.59509	0.00243315	0.00121658	0.998783	0.0375362	1	DownCRBM
ILMN_1740024	NAALAD2	10003	-23.3579	-11.4222	-11.3022	1.94183e-05	9.70917e-06	0.99999	0.00145533	1	DownCRBM
ILMN_1675266	NAGPA	51172	-25.0724	-11.8956	5.57376	0.000847844	0.000423922	0.999576	0.0182608	1	DownCRBM
ILMN_1747979	NCALD	83988	-31.1092	-20.8947	-6.08817	6.20868e-07	3.10434e-07	1	0.000190537	1	DownCRBM
ILMN_1749962	NCAM2	4685	-22.6166	-15.6688	0.409809	0.000172911	8.64557e-05	0.999914	0.00616699	1	DownCRBM
ILMN_1730845	NDN	4692	-28.4863	-20.6951	-15.3739	6.46859e-08	3.23429e-08	1	0.000112214	1	DownCRBM
ILMN_1724367	NDUFB1	4707	-17.4035	-13.1319	-1.88154	0.000583747	0.000291874	0.999708	0.0141683	1	DownCRBM
ILMN_1659086	NEFL	4747	-25.2795	-14.2869	-12.3263	3.71735e-06	1.85867e-06	0.999998	0.000542537	1	DownCRBM
ILMN_1809632	NEFM	4741	-18.4818	-7.33027	-9.70859	0.000280866	0.000140433	0.99986	0.00858228	1	DownCRBM
ILMN_1788149	NEK11	79858	-21.4988	-4.65739	0.388639	0.00266672	0.00133336	0.998667	0.0400803	1	DownCRBM
ILMN_1665095	NELF	26012	-25.3886	-17.4968	-0.786524	4.02366e-05	2.01183e-05	0.99998	0.00231246	1	DownCRBM
ILMN_1745817	NELL1	4745	-21.3129	-18.7746	-1.21122	6.99869e-05	3.49934e-05	0.999965	0.00322114	1	DownCRBM
ILMN_1730150	NETO1	81832	-21.6196	-11.4246	0.0506358	0.000550064	0.000275032	0.999725	0.0137108	1	DownCRBM
ILMN_1739450	NFE2L1	4779	-19.6432	-1.01275	-4.05712	0.00319292	0.00159646	0.998404	0.0453998	1	DownCRBM
ILMN_1800332	NGB	58157	-25.4283	-13.352	-2.96089	6.70865e-05	3.35432e-05	0.999966	0.00317646	1	DownCRBM
ILMN_1809613	NGEF	25791	-25.5317	-18.3362	-3.84433	1.30265e-05	6.51324e-06	0.999993	0.00108639	1	DownCRBM
ILMN_1675515	NIT2	56954	-23.7432	-12.702	-5.4487	6.20635e-05	3.10317e-05	0.999969	0.00304605	1	DownCRBM
ILMN_1731206	NKD2	85409	-23.7714	-14.5133	-3.25307	6.85429e-05	3.42715e-05	0.999966	0.00319838	1	DownCRBM
ILMN_1772814	NLK	51701	-21.2624	-16.0788	5.26724	0.000682569	0.000341285	0.999659	0.0156072	1	DownCRBM
ILMN_1712026	NLRP3	114548	-26.534	-10.9862	0.286202	0.00021735	0.000108675	0.999891	0.00713268	1	DownCRBM
ILMN_1784783	NME5	8382	-22.1739	-11.2884	-2.20171	0.00029377	0.000146885	0.999853	0.00887873	1	DownCRBM
ILMN_1709814	NMRAL1	57407	-25.5536	-7.63736	-7.97374	7.73625e-05	3.86813e-05	0.999961	0.00343468	1	DownCRBM
ILMN_1740250	NMU	10874	-14.2907	-9.52974	-1.29683	0.00273161	0.0013658	0.998634	0.0406698	1	DownCRBM
ILMN_1691413	NNAT	4826	-18.5285	-11.055	3.32599	0.00231747	0.00115874	0.998841	0.0363079	1	DownCRBM
ILMN_1747067	NPAS1	4861	-26.0342	-16.4472	-3.24219	2.30837e-05	1.15419e-05	0.999988	0.00160028	1	DownCRBM
ILMN_1765558	NPAS2	4862	-30.5153	-13.722	16.0889	0.00191088	0.000955442	0.999045	0.031965	1	DownCRBM
ILMN_1775736	NPM2	10361	-32.8963	-12.7877	6.11946	0.000137885	6.89424e-05	0.999931	0.00527254	1	DownCRBM
ILMN_1685608	NPTX2	4885	-12.4287	-11.8574	-4.51356	0.0012092	0.000604599	0.999395	0.0234894	1	DownCRBM
ILMN_1731062	NPY	4852	-15.1016	-13.7463	-2.13835	0.000779117	0.000389559	0.99961	0.0171468	1	DownCRBM
ILMN_1799878	NPY1R	4886	-24.5583	-12.3611	6.48835	0.00104431	0.000522157	0.999478	0.021122	1	DownCRBM
ILMN_1718198	NPY5R	4889	-18.8257	-11.6918	2.04553	0.00145267	0.000726335	0.999274	0.0263715	1	DownCRBM
ILMN_1720282	NQO1	1728	-9.98145	-6.74237	-8.80373	0.00232353	0.00116177	0.998838	0.0363079	1	DownCRBM
ILMN_1722809	NRCAM	4897	-26.0387	-11.7958	8.09761	0.00124918	0.00062459	0.999375	0.0239308	1	DownCRBM
ILMN_1774945	NRG3	10718	-23.4621	-14.8453	0.738067	0.000189591	9.47954e-05	0.999905	0.00657476	1	DownCRBM
ILMN_1705686	NRGN	4900	-35.9313	-21.1269	-0.780991	7.64149e-07	3.82075e-07	1	0.000217332	1	DownCRBM
ILMN_1699574	NRP1	8829	-26.3804	-14.7814	-6.98675	1.16112e-05	5.80558e-06	0.999994	0.000999915	1	DownCRBM
ILMN_1653762	NRSN1	140767	-27.9239	-19.0118	-9.49335	9.74219e-07	4.87109e-07	1	0.000257287	1	DownCRBM
ILMN_1749799	NSBP1	79366	-14.3374	-4.41207	-5.64759	0.00314204	0.00157102	0.998429	0.044843	1	DownCRBM
ILMN_1692163	NSDHL	50814	-22.2563	-0.928058	-4.24615	0.00189165	0.000945825	0.999054	0.0317431	1	DownCRBM
ILMN_1756049	NT5DC3	51559	-24.2669	-17.046	-3.1686	3.14052e-05	1.57026e-05	0.999984	0.00200199	1	DownCRBM
ILMN_1697220	NT5E	4907	-15.5683	-8.54312	-1.74514	0.00238841	0.0011942	0.998806	0.0371039	1	DownCRBM
ILMN_1761280	NTSR2	23620	-10.2353	-7.2755	-7.73273	0.00247845	0.00123922	0.998761	0.0379709	1	DownCRBM
ILMN_1750412	NUBPL	80224	-23.5216	-5.52775	-2.12954	0.000855288	0.000427644	0.999572	0.0182791	1	DownCRBM
ILMN_1669788	NUDT14	256281	-32.4326	-19.9609	-12.2126	7.08166e-08	3.54083e-08	1	0.000112214	1	DownCRBM
ILMN_1724907	NUDT3	11165	-23.0678	-3.88866	-1.46733	0.00155767	0.000778835	0.999221	0.0278224	1	DownCRBM
ILMN_1655046	NUTF2	10204	-19.4442	-3.77984	-3.22453	0.0022321	0.00111605	0.998884	0.0353113	1	DownCRBM
ILMN_1677624	NXPH2	11249	-19.6016	-7.76599	-8.09172	0.000291643	0.000145822	0.999854	0.00883855	1	DownCRBM
ILMN_1668345	OAF	220323	-12.5735	-13.1708	-0.272274	0.00221456	0.00110728	0.998893	0.0352422	1	DownCRBM
ILMN_1746116	OCA2	4948	-22.9937	-15.358	0.22731	0.000163525	8.17626e-05	0.999918	0.00596652	1	DownCRBM
ILMN_1700306	OCIAD2	132299	-28.7313	-17.9257	-3.59639	6.66912e-06	3.33456e-06	0.999997	0.000770562	1	DownCRBM
ILMN_1714709	OLFM1	10439	-27.8385	-17.784	15.1764	0.00111447	0.000557234	0.999443	0.0222332	1	DownCRBM
ILMN_1742025	OLFM1	10439	-25.1819	-12.2202	12.7034	0.00356969	0.00178485	0.998215	0.0490645	1	DownCRBM
ILMN_1739235	OMG	4974	-19.9061	-5.54066	-4.95565	0.000954951	0.000477476	0.999523	0.019725	1	DownCRBM
ILMN_1669497	OSBPL10	114884	-25.9512	-16.7606	-1.06583	3.95074e-05	1.97537e-05	0.99998	0.00228238	1	DownCRBM
ILMN_1773063	OSBPL1A	114876	-28.1445	-11.6517	-9.72919	8.03173e-06	4.01586e-06	0.999996	0.000850502	1	DownCRBM
ILMN_1735798	OSBPL3	26031	-28.3451	-5.55477	8.36369	0.00313398	0.00156699	0.998433	0.0447965	1	DownCRBM
ILMN_1766654	OSBPL5	114879	-12.7953	-0.44391	-11.1175	0.00306865	0.00153432	0.998466	0.0440329	1	DownCRBM
ILMN_1724832	OVOL2	58495	-21.433	-9.9312	6.92494	0.00352762	0.00176381	0.998236	0.0487277	1	DownCRBM
ILMN_1798029	PAK3	5063	-36.0316	-23.7376	-12.2186	5.40029e-09	2.70014e-09	1	3.84504e-05	1	DownCRBM
ILMN_1698445	PALM2	114299	-20.11	-7.00434	1.61795	0.00276787	0.00138394	0.998616	0.0410832	1	DownCRBM
ILMN_1705187	PAP2D	163404	-34.9162	-20.8499	-4.05027	3.89136e-07	1.94568e-07	1	0.000172652	1	DownCRBM
ILMN_1668675	PAPSS2	9060	-15.8113	-7.1935	-2.55668	0.00254435	0.00127217	0.998728	0.0387131	1	DownCRBM
ILMN_1796682	PARP3	10039	-22.5117	-3.59982	1.47074	0.00340945	0.00170473	0.998295	0.0476893	1	DownCRBM
ILMN_1761010	PCCB	5096	-21.7977	-2.30748	-4.26824	0.0015362	0.000768101	0.999232	0.0276168	1	DownCRBM
ILMN_1688500	PCDH10	57575	-25.677	-17.2809	-6.4408	7.97729e-06	3.98865e-06	0.999996	0.000850502	1	DownCRBM
ILMN_1715458	PCDH10	57575	-22.7647	-14.6191	-5.23112	5.0308e-05	2.5154e-05	0.999975	0.00264368	1	DownCRBM
ILMN_1805132	PCDH19	57526	-27.5839	-19.8892	-6.92543	1.84209e-06	9.21043e-07	0.999999	0.000358463	1	DownCRBM
ILMN_1703572	PCDH20	64881	-20.4616	-16.2387	-3.94143	8.13017e-05	4.06508e-05	0.999959	0.00356442	1	DownCRBM
ILMN_1670383	PCDH7	5099	-22.0464	-16.6247	-8.56056	1.37521e-05	6.87604e-06	0.999993	0.00112991	1	DownCRBM
ILMN_1740623	PCDH8	5100	-17.6537	-13.0752	3.17493	0.00174053	0.000870265	0.99913	0.0301162	1	DownCRBM
ILMN_1752294	PCDH9	5101	-25.8354	-10.2657	-10.7657	1.63934e-05	8.19671e-06	0.999992	0.00127158	1	DownCRBM
ILMN_1710859	PCSK1	5122	-18.0641	-12.4454	-4.14957	0.000346981	0.000173491	0.999827	0.00986851	1	DownCRBM
ILMN_1695003	PCSK2	5126	-17.8395	-8.7714	2.61377	0.00363305	0.00181653	0.998183	0.0498736	1	DownCRBM
ILMN_1805098	PDE1B	5153	-28.1853	-12.6192	1.25752	0.000125771	6.28857e-05	0.999937	0.00494701	1	DownCRBM
ILMN_1681356	PDE2A	5138	-36.9434	-22.0698	-2.2544	2.53837e-07	1.26918e-07	1	0.000150495	1	DownCRBM
ILMN_1806533	PDE7B	27115	-23.2286	-17.1937	-6.56679	1.51669e-05	7.58344e-06	0.999992	0.00119313	1	DownCRBM
ILMN_1659197	PDE8B	8622	-32.7708	-18.7033	-9.69795	2.32132e-07	1.16066e-07	1	0.000150495	1	DownCRBM
ILMN_1690125	PDLIM7	9260	-30.1291	-16.2073	-12.5234	4.64574e-07	2.32287e-07	1	0.000184038	1	DownCRBM
ILMN_1747019	PDYN	5173	-16.3007	-12.0433	-0.197022	0.00137031	0.000685155	0.999315	0.0254598	1	DownCRBM
ILMN_1729095	PDZD2	23037	-23.0604	-14.4067	3.30631	0.000431745	0.000215872	0.999784	0.0115824	1	DownCRBM
ILMN_1658759	PEX19	5824	-27.8957	-4.23069	3.56146	0.001643	0.000821498	0.999179	0.0288488	1	DownCRBM
ILMN_1722037	PEX5L	51555	-14.9794	-4.92708	-7.36408	0.00174135	0.000870675	0.999129	0.0301162	1	DownCRBM
ILMN_1682757	PFKFB2	5208	-24.1598	-15.4557	-9.61564	8.05109e-06	4.02554e-06	0.999996	0.000850502	1	DownCRBM
ILMN_1716265	PGM2L1	283209	-25.3276	-16.8675	0.0799443	6.10732e-05	3.05366e-05	0.999969	0.00301077	1	DownCRBM
ILMN_1736982	PHACTR1	221692	-25.8807	-15.5221	4.05537	0.000210562	0.000105281	0.999895	0.00697181	1	DownCRBM
ILMN_1659106	PHLDA3	23612	-14.209	-0.597614	-11.8475	0.00194556	0.00097278	0.999027	0.032354	1	DownCRBM
ILMN_1813208	PID1	55022	-22.8794	-15.2152	-4.69623	4.8158e-05	2.4079e-05	0.999976	0.00255583	1	DownCRBM
ILMN_1713471	PIG38	55068	-26.6096	-9.48273	-3.73838	0.000112439	5.62193e-05	0.999944	0.00455172	1	DownCRBM
ILMN_1666924	PINK1	65018	-26.2256	-7.12507	-0.936174	0.000438528	0.000219264	0.999781	0.0117209	1	DownCRBM
ILMN_1789361	PKD2L1	9033	-22.2088	-12.5076	9.0305	0.00278149	0.00139075	0.998609	0.0411098	1	DownCRBM
ILMN_1723969	PLCB1	23236	-28.0044	-14.4481	4.28056	0.000178349	8.91744e-05	0.999911	0.00628014	1	DownCRBM
ILMN_1724066	PLCB2	5330	-20.9286	-13.4406	-3.74576	0.000156593	7.82964e-05	0.999922	0.00580912	1	DownCRBM
ILMN_1666976	PLD3	23646	-27.0264	-10.151	-0.428665	0.000199724	9.98621e-05	0.9999	0.00681335	1	DownCRBM
ILMN_1785265	PLS3	5358	-18.8993	-7.14761	-7.8759	0.000416172	0.000208086	0.999792	0.011388	1	DownCRBM
ILMN_1697189	PNCK	139728	-32.4767	-16.9146	4.704	3.55261e-05	1.7763e-05	0.999982	0.00214894	1	DownCRBM
ILMN_1790778	PNMA2	10687	-30.7926	-19.2818	-8.12222	5.92521e-07	2.9626e-07	1	0.000189833	1	DownCRBM
ILMN_1783805	PNMA3	29944	-27.237	-9.44295	-3.35219	0.000108115	5.40573e-05	0.999946	0.00440885	1	DownCRBM
ILMN_1750337	PNMA5	114824	-22.4547	-13.9212	3.21354	0.000539693	0.000269846	0.99973	0.0136052	1	DownCRBM
ILMN_1676003	PNOC	5368	-16.0416	-8.53907	-0.730185	0.00269665	0.00134832	0.998652	0.0403116	1	DownCRBM
ILMN_1660063	POLE4	56655	-28.7003	-14.7964	-8.33453	4.11972e-06	2.05986e-06	0.999998	0.000568676	1	DownCRBM
ILMN_1652244	POPDC3	64208	-29.8641	-11.709	-9.54938	5.20523e-06	2.60262e-06	0.999997	0.000668258	1	DownCRBM
ILMN_1725772	POU3F2	5454	-21.4993	-7.70083	-3.7417	0.000551496	0.000275748	0.999724	0.0137157	1	DownCRBM
ILMN_1652017	PPEF1	5475	-21.6385	-14.5145	-5.19434	6.89156e-05	3.44578e-05	0.999966	0.00319838	1	DownCRBM
ILMN_1679460	PPFIBP1	8496	-30.2963	-17.6966	-7.47387	1.40088e-06	7.00438e-07	0.999999	0.000312855	1	DownCRBM
ILMN_1806320	PPFIBP1	8496	-19.707	-10.0869	-4.058	0.000432305	0.000216153	0.999784	0.0115824	1	DownCRBM
ILMN_1705384	PPFIBP1	8496	-15.6112	-9.82911	-2.94452	0.0013953	0.000697651	0.999302	0.0257945	1	DownCRBM
ILMN_1657810	PPM1M	132160	-27.5061	-15.9696	5.07607	0.00016727	8.36352e-05	0.999916	0.00608316	1	DownCRBM
ILMN_1664855	PPP1R14C	81706	-19.8041	-10.3568	-4.82618	0.000330094	0.000165047	0.999835	0.00958481	1	DownCRBM
ILMN_1736670	PPP1R3C	5507	-12.8521	-9.71383	-6.83357	0.00106219	0.000531097	0.999469	0.0213827	1	DownCRBM
ILMN_1660732	PPP2R2B	5521	-35.074	-15.437	-8.46518	5.07944e-07	2.53972e-07	1	0.000189833	1	DownCRBM
ILMN_1802082	PRDM8	56978	-23.8583	-13.9935	1.56018	0.000261818	0.000130909	0.999869	0.00820364	1	DownCRBM
ILMN_1783388	PRG2	79948	-33.071	-22.6286	-7.16002	1.33207e-07	6.66037e-08	1	0.000122969	1	DownCRBM
ILMN_1741356	PRICKLE1	144165	-24.4977	-10.2433	2.3956	0.000672875	0.000336438	0.999664	0.015549	1	DownCRBM
ILMN_1683148	PRICKLE2	166336	-33.6358	-22.791	-5.60894	1.79392e-07	8.9696e-08	1	0.000132654	1	DownCRBM
ILMN_1771800	PRKCA	5578	-20.4905	-8.79295	1.27041	0.00164278	0.000821388	0.999179	0.0288488	1	DownCRBM
ILMN_1806908	PRKCB1	5579	-26.8123	-18.7839	12.2347	0.000564062	0.000282031	0.999718	0.0138727	1	DownCRBM
ILMN_1716563	PRKCB1	5579	-22.0432	-16.2934	10.6252	0.00182432	0.00091216	0.999088	0.0309883	1	DownCRBM
ILMN_1733421	PRKCQ	5588	-18.4211	-4.33144	-7.92827	0.000871192	0.000435596	0.999564	0.018512	1	DownCRBM
ILMN_1807610	PRPH2	5961	-17.2474	-11.8389	-0.233916	0.00117327	0.000586634	0.999413	0.0229711	1	DownCRBM
ILMN_1692664	PRR5	55615	-17.7952	-11.0747	-5.12882	0.000403348	0.000201674	0.999798	0.0111849	1	DownCRBM
ILMN_1797776	PRSS23	11098	-15.4581	-4.84141	-8.27774	0.00132208	0.00066104	0.999339	0.0249397	1	DownCRBM
ILMN_1671843	PSRC1	84722	-16.0646	-5.95869	-7.76607	0.00102376	0.000511881	0.999488	0.0208453	1	DownCRBM
ILMN_1713829	PTGES	9536	-16.3234	-9.46291	-9.58516	0.000280511	0.000140255	0.99986	0.00858228	1	DownCRBM
ILMN_1708275	PTGS1	5742	-11.9679	-5.55066	-7.86753	0.00246876	0.00123438	0.998766	0.0378867	1	DownCRBM
ILMN_1729075	PTHR2	5746	-26.8357	-16.915	0.283121	4.38359e-05	2.19179e-05	0.999978	0.00241904	1	DownCRBM
ILMN_1810962	PTPRK	5796	-27.2138	-7.54063	-1.25026	0.000295915	0.000147957	0.999852	0.00890645	1	DownCRBM
ILMN_1728844	PTPRN2	5799	-30.4028	-17.5607	-4.72932	3.3266e-06	1.6633e-06	0.999998	0.000511673	1	DownCRBM
ILMN_1720113	PTPRO	5800	-22.3513	-13.3257	-3.38318	0.000126662	6.33308e-05	0.999937	0.00496442	1	DownCRBM
ILMN_1698885	PTPRT	11122	-31.3349	-18.8047	-5.51393	1.3595e-06	6.79748e-07	0.999999	0.000312855	1	DownCRBM
ILMN_1685240	PTRH1	138428	-28.5777	-14.8006	-1.00556	3.52814e-05	1.76407e-05	0.999982	0.00214894	1	DownCRBM
ILMN_1811594	PTRH2	51651	-23.0918	-8.30457	-5.94518	0.000196527	9.82635e-05	0.999902	0.00673585	1	DownCRBM
ILMN_1727633	PVRL3	25945	-21.3381	-17.3375	-3.22103	5.9533e-05	2.97665e-05	0.99997	0.0029745	1	DownCRBM
ILMN_1764609	PWWP2	170394	-23.6152	-7.11799	5.46937	0.00307576	0.00153788	0.998462	0.0440779	1	DownCRBM
ILMN_1741727	QPCT	25797	-22.1644	-15.7722	-11.622	6.97909e-06	3.48955e-06	0.999997	0.000781941	1	DownCRBM
ILMN_1733045	RAB36	9609	-22.3912	-9.04825	1.71089	0.00116769	0.000583843	0.999416	0.0229492	1	DownCRBM
ILMN_1685820	RAB40B	10966	-20.9797	-9.24757	1.16546	0.00131992	0.000659958	0.99934	0.0249397	1	DownCRBM
ILMN_1752299	RAB6B	51560	-32.309	-14.4914	-2.68688	9.01636e-06	4.50818e-06	0.999995	0.000890016	1	DownCRBM
ILMN_1676358	RALB	5899	-24.1398	-9.06822	8.10029	0.00321328	0.00160664	0.998393	0.0454613	1	DownCRBM
ILMN_1662198	RANGAP1	5905	-27.231	-9.45832	-5.76627	5.7118e-05	2.8559e-05	0.999971	0.00289294	1	DownCRBM
ILMN_1677404	RAP2A	5911	-26.0673	-10.715	0.891297	0.00029945	0.000149725	0.99985	0.00892561	1	DownCRBM
ILMN_1671151	RARB	5915	-25.6605	-15.3155	7.13042	0.000489455	0.000244727	0.999755	0.0126257	1	DownCRBM
ILMN_1793517	RASAL1	8437	-29.8361	-17.4246	-2.09145	8.91774e-06	4.45887e-06	0.999996	0.000890016	1	DownCRBM
ILMN_1653464	RASD2	23551	-21.6586	-9.46183	3.92328	0.00199791	0.000998955	0.999001	0.0328169	1	DownCRBM
ILMN_1738266	RASL10A	10633	-26.8167	-17.6531	-0.606599	2.82173e-05	1.41086e-05	0.999986	0.00185732	1	DownCRBM
ILMN_1788813	RASL10B	91608	-23.9852	-5.19026	1.79194	0.00198247	0.000991235	0.999009	0.0326739	1	DownCRBM
ILMN_1814719	RBP4	5950	-27.5276	-19.086	-6.30335	2.90636e-06	1.45318e-06	0.999999	0.000454047	1	DownCRBM
ILMN_1733746	REEP1	65055	-21.4799	-8.31422	-4.73415	0.000379139	0.000189569	0.99981	0.010593	1	DownCRBM
ILMN_1746359	RERG	85004	-13.9326	-9.17044	-8.3608	0.000677556	0.000338778	0.999661	0.0155817	1	DownCRBM
ILMN_1651708	RESP18	389075	-13.4192	-1.63782	-9.02982	0.00328205	0.00164102	0.998359	0.0463161	1	DownCRBM
ILMN_1800787	RFTN1	23180	-21.1858	-15.4522	8.36371	0.00159035	0.000795173	0.999205	0.0282242	1	DownCRBM
ILMN_1696828	RGS14	10636	-23.5244	-12.564	4.29781	0.000754148	0.000377074	0.999623	0.01673	1	DownCRBM
ILMN_1758067	RGS4	5999	-25.8066	-20.342	-8.29726	1.73818e-06	8.69092e-07	0.999999	0.000355284	1	DownCRBM
ILMN_1778267	RGS6	9628	-19.8211	-9.24038	-3.01812	0.000655175	0.000327588	0.999672	0.0151883	1	DownCRBM
ILMN_1809437	RHBDD2	57414	-29.4143	-15.362	-7.63005	3.52454e-06	1.76227e-06	0.999998	0.000528299	1	DownCRBM
ILMN_1810559	RHOQ	23433	-9.88743	-3.38602	-11.0487	0.00296185	0.00148092	0.998519	0.0427771	1	DownCRBM
ILMN_1742003	RHPN1	114822	-21.3074	-9.46045	-2.19059	0.000549287	0.000274644	0.999725	0.0137108	1	DownCRBM
ILMN_1722726	RICS	9743	-21.9655	-15.2482	10.3108	0.00215924	0.00107962	0.99892	0.0346102	1	DownCRBM
ILMN_1752764	RIMBP2	23504	-33.6339	-18.9253	-3.77784	1.16019e-06	5.80095e-07	0.999999	0.000279757	1	DownCRBM
ILMN_1758939	RIPK2	8767	-19.481	-7.59344	0.319947	0.00210808	0.00105404	0.998946	0.0340441	1	DownCRBM
ILMN_1671281	RNASEL	6041	-23.2553	-2.97563	-5.32626	0.00077722	0.00038861	0.999611	0.017139	1	DownCRBM
ILMN_1671565	RNASET2	8635	-11.3285	-7.74739	-6.41454	0.00239913	0.00119956	0.9988	0.0372183	1	DownCRBM
ILMN_1651838	RND1	27289	-24.2978	-18.3741	-1.52334	3.411e-05	1.7055e-05	0.999983	0.00210193	1	DownCRBM
ILMN_1759513	RND3	390	-20.3839	-5.90537	-1.13825	0.00184981	0.000924905	0.999075	0.0313125	1	DownCRBM
ILMN_1706266	RNF157	114804	-19.9016	-5.08831	-3.18062	0.00156131	0.000780656	0.999219	0.0278425	1	DownCRBM
ILMN_1746658	RORB	6096	-16.3327	-10.0662	1.73346	0.00310247	0.00155124	0.998449	0.0444034	1	DownCRBM
ILMN_1744584	RP11-529I10.4	25911	-38.1902	-20.5712	-11.6229	1.03995e-08	5.19975e-09	1	3.84504e-05	1	DownCRBM
ILMN_1810423	RPP40	10799	-22.464	-9.02632	-0.205126	0.000750888	0.000375444	0.999625	0.0166911	1	DownCRBM
ILMN_1665425	RPRM	56475	-22.7027	-18.502	-2.63031	3.63756e-05	1.81878e-05	0.999982	0.00216924	1	DownCRBM
ILMN_1767253	RRP12	23223	-23.5154	-4.99347	-2.25522	0.000938261	0.00046913	0.999531	0.0194891	1	DownCRBM
ILMN_1695108	RSPO2	340419	-19.4487	-14.5764	5.31707	0.00140215	0.000701076	0.999299	0.025835	1	DownCRBM
ILMN_1658643	RTN3	10313	-26.7825	-7.458	-1.71275	0.000297096	0.000148548	0.999851	0.00890645	1	DownCRBM
ILMN_1738657	SATB2	23314	-36.0518	-21.9847	-1.51318	4.39324e-07	2.19662e-07	1	0.000184038	1	DownCRBM
ILMN_1720889	SC4MOL	6307	-13.8731	-2.62243	-8.37084	0.00282333	0.00141167	0.998588	0.0412572	1	DownCRBM
ILMN_1703178	SCG2	7857	-18.2754	-9.84545	-10.482	0.000130057	6.50287e-05	0.999935	0.00506174	1	DownCRBM
ILMN_1700328	SCN3B	55800	-17.9183	-13.5134	4.09004	0.00183119	0.000915593	0.999084	0.0310574	1	DownCRBM
ILMN_1676709	SDK2	54549	-16.9548	-5.29168	-9.69152	0.000637258	0.000318629	0.999681	0.0149124	1	DownCRBM
ILMN_1765641	SEMA3A	10371	-14.5426	-4.26757	-5.09705	0.00348179	0.0017409	0.998259	0.0483355	1	DownCRBM
ILMN_1702787	SEMA4A	64218	-20.8537	-16.2658	-3.03792	9.30575e-05	4.65287e-05	0.999953	0.00392469	1	DownCRBM
ILMN_1794370	SEMA5B	54437	-26.7425	-16.8873	1.76623	6.72978e-05	3.36489e-05	0.999966	0.00317646	1	DownCRBM
ILMN_1685078	SERPINF1	5176	-19.1911	-12.4944	0.966755	0.000889431	0.000444716	0.999555	0.0187916	1	DownCRBM
ILMN_1814333	SERPINI1	5274	-20.7961	-16.648	-8.077	2.17405e-05	1.08703e-05	0.999989	0.00154982	1	DownCRBM
ILMN_1702835	SH3BGRL	6451	-20.6103	-10.305	-10.2831	6.9499e-05	3.47495e-05	0.999965	0.00321201	1	DownCRBM
ILMN_1737163	SH3BGRL3	83442	-19.8816	-4.79564	-7.38311	0.000653214	0.000326607	0.999673	0.0151883	1	DownCRBM
ILMN_1808501	SH3KBP1	30011	-27.3184	-10.2271	-11.6247	8.71374e-06	4.35687e-06	0.999996	0.000890016	1	DownCRBM
ILMN_1810782	SH3KBP1	30011	-27.1405	-9.65366	-10.6798	1.41763e-05	7.08817e-06	0.999993	0.00113914	1	DownCRBM
ILMN_1656826	SH3RF1	57630	-27.1957	-12.2704	-7.4738	1.66384e-05	8.31922e-06	0.999992	0.00128162	1	DownCRBM
ILMN_1770905	SHC3	53358	-23.1882	-15.5506	-2.96503	6.49281e-05	3.24641e-05	0.999968	0.00310424	1	DownCRBM
ILMN_1681777	SHROOM2	357	-23.7296	-10.2064	-1.07332	0.000353982	0.000176991	0.999823	0.00999076	1	DownCRBM
ILMN_1807981	SIGIRR	59307	-10.8019	-4.3419	-10.8573	0.00212335	0.00106167	0.998938	0.0341832	1	DownCRBM
ILMN_1678729	SIL1	64374	-20.9377	-8.79164	-8.93181	0.000134976	6.74882e-05	0.999933	0.00519847	1	DownCRBM
ILMN_1732923	SIPA1L2	57568	-31.1162	-18.3048	-13.629	1.16767e-07	5.83833e-08	1	0.000117743	1	DownCRBM
ILMN_1657129	SKAP2	8935	-19.7198	-11.6412	-4.22496	0.000285664	0.000142832	0.999857	0.00870491	1	DownCRBM
ILMN_1673637	SLC10A4	201780	-18.566	-8.97065	-3.44723	0.000822649	0.000411325	0.999589	0.0178918	1	DownCRBM
ILMN_1797600	SLC12A8	84561	-20.9657	-12.0034	5.97522	0.00207086	0.00103543	0.998965	0.0335818	1	DownCRBM
ILMN_1666904	SLC17A6	57084	-15.6721	-16.4096	-14.4848	1.43779e-05	7.18896e-06	0.999993	0.00113914	1	DownCRBM
ILMN_1767842	SLC17A8	246213	-19.0349	-8.81319	-3.97012	0.000685335	0.000342668	0.999657	0.0156072	1	DownCRBM
ILMN_1785380	SLC1A2	6506	-13.2892	-12.9019	1.23597	0.00279465	0.00139733	0.998603	0.0411664	1	DownCRBM
ILMN_1815581	SLC22A18	5002	-23.6734	-8.82777	-3.65742	0.000266696	0.000133348	0.999867	0.00826311	1	DownCRBM
ILMN_1675391	SLC24A4	123041	-17.7409	-11.9483	-11.6899	6.25581e-05	3.12791e-05	0.999969	0.00305681	1	DownCRBM
ILMN_1679949	SLC25A23	79085	-18.7933	-9.66667	1.13311	0.00185187	0.000925937	0.999074	0.0313125	1	DownCRBM
ILMN_1739751	SLC26A11	284129	-23.2397	-10.9549	-9.57251	3.6854e-05	1.8427e-05	0.999982	0.00217855	1	DownCRBM
ILMN_1652465	SLC26A4	5172	-20.5887	-11.5138	7.69797	0.0035138	0.0017569	0.998243	0.0485973	1	DownCRBM
ILMN_1778321	SLC2A6	11182	-19.7702	-3.70592	-7.47908	0.00083788	0.00041894	0.999581	0.0181874	1	DownCRBM
ILMN_1805807	SLC30A3	7781	-27.8426	-21.9454	-1.09022	5.47468e-06	2.73734e-06	0.999997	0.000690059	1	DownCRBM
ILMN_1742731	SLC35A2	7355	-27.2699	-8.12189	4.75796	0.00103922	0.000519612	0.99948	0.0210732	1	DownCRBM
ILMN_1749848	SLC35F1	222553	-28.5842	-18.844	-4.4993	4.0311e-06	2.01555e-06	0.999998	0.000568676	1	DownCRBM
ILMN_1656129	SLC39A10	57181	-21.1413	-13.5039	6.72752	0.00171012	0.000855059	0.999145	0.0297781	1	DownCRBM
ILMN_1712023	SLC8A3	6547	-23.4807	-4.76948	-1.89695	0.00107618	0.000538088	0.999462	0.021598	1	DownCRBM
ILMN_1705231	SLCO2A1	6578	-15.1037	-7.75614	-2.81119	0.00246028	0.00123014	0.99877	0.0378867	1	DownCRBM
ILMN_1756959	SLIT1	6585	-25.7399	-16.7725	4.05734	0.000159449	7.97247e-05	0.99992	0.00587579	1	DownCRBM
ILMN_1676449	SLIT2	9353	-31.1373	-23.7011	-8.95389	9.17585e-08	4.58792e-08	1	0.000113087	1	DownCRBM
ILMN_1682738	SMAD3	4088	-23.2655	-17.1197	3.70613	0.00023676	0.00011838	0.999882	0.007612	1	DownCRBM
ILMN_1804642	SMUG1	23583	-22.2921	-5.36187	-1.79694	0.00123104	0.00061552	0.999384	0.0237791	1	DownCRBM
ILMN_1721605	SMYD2	56950	-21.6199	-14.4709	-1.68077	0.000173545	8.67727e-05	0.999913	0.00616976	1	DownCRBM
ILMN_1653161	SNCG	6623	-16.7503	-8.72894	-9.49046	0.000311463	0.000155732	0.999844	0.00916379	1	DownCRBM
ILMN_1763207	SNFT	55509	-21.7299	-15.3022	4.89144	0.000676951	0.000338475	0.999662	0.0155817	1	DownCRBM
ILMN_1786257	SNX10	29887	-19.9037	-7.11659	-3.564	0.000919316	0.000459658	0.99954	0.0192761	1	DownCRBM
ILMN_1656383	SOHLH1	402381	-19.2606	-8.35708	-1.98369	0.00113497	0.000567486	0.999433	0.0226016	1	DownCRBM
ILMN_1716407	SORBS2	8470	-20.2817	-12.4078	7.20886	0.00281079	0.00140539	0.998595	0.0411852	1	DownCRBM
ILMN_1680251	SORCS1	114815	-38.6187	-17.9141	-0.366633	1.09782e-06	5.4891e-07	0.999999	0.000273794	1	DownCRBM
ILMN_1665492	SORCS1	114815	-23.6342	-13.3946	1.94588	0.000349348	0.000174674	0.999825	0.00988513	1	DownCRBM
ILMN_1695935	SORCS2	57537	-20.4319	-3.72665	-3.80634	0.00164323	0.000821613	0.999178	0.0288488	1	DownCRBM
ILMN_1707077	SORT1	6272	-21.5324	-7.28247	-8.5032	0.000191222	9.56111e-05	0.999904	0.00660759	1	DownCRBM
ILMN_1773459	SOX11	6664	-13.9907	-3.69969	-6.29407	0.00339403	0.00169701	0.998303	0.0475642	1	DownCRBM
ILMN_1678423	SPA17	53340	-23.8637	-15.897	-8.87629	9.52771e-06	4.76386e-06	0.999995	0.000912852	1	DownCRBM
ILMN_1795251	SPARCL1	8404	-33.2623	-20.3567	2.1135	5.14319e-06	2.5716e-06	0.999997	0.000668258	1	DownCRBM
ILMN_1689251	SPG3A	51062	-24.6396	-9.3364	4.96632	0.00142328	0.00071164	0.999288	0.0260578	1	DownCRBM
ILMN_1705849	SPR	6697	-20.615	-9.18153	-11.673	6.45168e-05	3.22584e-05	0.999968	0.00309792	1	DownCRBM
ILMN_1753648	SPRYD5	84767	-25.6268	-19.0525	-2.71087	1.43459e-05	7.17296e-06	0.999993	0.00113914	1	DownCRBM
ILMN_1751072	SRPRB	58477	-19.5659	-2.54149	-2.59407	0.00320483	0.00160242	0.998398	0.0453998	1	DownCRBM
ILMN_1812824	SST	6750	-15.1643	-12.7436	-5.76954	0.000415601	0.0002078	0.999792	0.011388	1	DownCRBM
ILMN_1673998	SSTR1	6751	-18.0372	-13.8003	-5.76025	0.000168484	8.4242e-05	0.999916	0.00608738	1	DownCRBM
ILMN_1756501	ST6GAL1	6480	-23.1707	-14.8259	-7.96795	2.01519e-05	1.0076e-05	0.99999	0.00149019	1	DownCRBM
ILMN_1773959	ST6GALNAC5	81849	-21.7721	-16.0694	-2.32441	9.46014e-05	4.73007e-05	0.999953	0.00397469	1	DownCRBM
ILMN_1756937	ST8SIA4	7903	-18.5305	-7.39746	-7.51989	0.000462834	0.000231417	0.999769	0.0121942	1	DownCRBM
ILMN_1785202	STAT4	6775	-23.066	-13.8989	-7.77078	2.82986e-05	1.41493e-05	0.999986	0.00185732	1	DownCRBM
ILMN_1663575	STEAP1	26872	-21.4341	-6.26803	-5.27571	0.000544679	0.00027234	0.999728	0.0136669	1	DownCRBM
ILMN_1672302	STK32C	282974	-25.1154	-14.0588	4.84757	0.000431244	0.000215622	0.999784	0.0115824	1	DownCRBM
ILMN_1745593	STMN1	3925	-17.5272	-12.2234	4.76224	0.002972	0.001486	0.998514	0.0428679	1	DownCRBM
ILMN_1801130	STOML1	9399	-31.4308	-12.2689	-5.57993	9.33637e-06	4.66819e-06	0.999995	0.000908412	1	DownCRBM
ILMN_1705655	STXBP6	29091	-23.1336	-13.8862	-10.7191	1.21025e-05	6.05125e-06	0.999994	0.00102729	1	DownCRBM
ILMN_1709750	SUSD1	64420	-23.5904	-15.9807	-3.47938	4.56628e-05	2.28314e-05	0.999977	0.00247069	1	DownCRBM
ILMN_1785175	SWAP70	23075	-20.1644	-9.31731	-10.272	0.000100376	5.01878e-05	0.99995	0.00416522	1	DownCRBM
ILMN_1757081	SYN2	6854	-21.7107	-12.3146	9.07043	0.00320426	0.00160213	0.998398	0.0453998	1	DownCRBM
ILMN_1808136	SYNGR3	9143	-18.2977	-6.03597	-0.867479	0.00285051	0.00142526	0.998575	0.0414755	1	DownCRBM
ILMN_1657760	SYT17	51760	-26.2614	-18.9171	-5.72461	5.19298e-06	2.59649e-06	0.999997	0.000668258	1	DownCRBM
ILMN_1755571	SYT5	6861	-22.7609	-9.41203	5.2891	0.00217467	0.00108734	0.998913	0.0347572	1	DownCRBM
ILMN_1682929	SYTL2	54843	-28.1536	-21.2165	5.29994	3.86557e-05	1.93279e-05	0.999981	0.00224487	1	DownCRBM
ILMN_1790270	TAC1	6863	-14.8849	-9.65252	-2.16347	0.00198004	0.000990018	0.99901	0.0326739	1	DownCRBM
ILMN_1793006	TAC3	6866	-19.9384	-14.7008	-1.24522	0.000268358	0.000134179	0.999866	0.00829145	1	DownCRBM
ILMN_1770084	TACC1	6867	-28.7368	-7.05187	4.7467	0.000971676	0.000485838	0.999514	0.019996	1	DownCRBM
ILMN_1721093	TAF10	6881	-18.6561	-4.5274	-4.46714	0.00170793	0.000853965	0.999146	0.0297781	1	DownCRBM
ILMN_1741540	TBC1D22A	25771	-23.2686	-3.89924	-6.34286	0.000495137	0.000247568	0.999752	0.0127131	1	DownCRBM
ILMN_1661622	TBC1D7	51256	-23.2987	-6.46328	3.88932	0.00269642	0.00134821	0.998652	0.0403116	1	DownCRBM
ILMN_1739366	TBR1	10716	-21.9872	-14.9858	7.55611	0.0012557	0.000627851	0.999372	0.0240142	1	DownCRBM
ILMN_1750181	TESC	54997	-27.8932	-15.2437	-5.17913	1.14673e-05	5.73367e-06	0.999994	0.000999915	1	DownCRBM
ILMN_1709451	TFPT	29844	-21.5431	-10.2443	2.07842	0.00115787	0.000578937	0.999421	0.0228139	1	DownCRBM
ILMN_1736078	THBS4	7060	-18.2107	-7.94853	-12.9563	0.00011339	5.66952e-05	0.999943	0.00457355	1	DownCRBM
ILMN_1797336	THEM2	55856	-26.0767	-10.8758	-7.77963	3.00645e-05	1.50322e-05	0.999985	0.00193881	1	DownCRBM
ILMN_1779875	THY1	7070	-30.337	-14.3093	-4.02179	1.09316e-05	5.46578e-06	0.999995	0.000993876	1	DownCRBM
ILMN_1724863	TICAM1	148022	-27.8432	-7.69905	2.48401	0.000603892	0.000301946	0.999698	0.0145301	1	DownCRBM
ILMN_1670054	TIMP2	7077	-18.4699	-11.3521	-15.9402	1.90366e-05	9.51832e-06	0.99999	0.00143642	1	DownCRBM
ILMN_1755158	TLL2	7093	-23.1291	-8.62316	-3.79572	0.000306173	0.000153087	0.999847	0.00908041	1	DownCRBM
ILMN_1700042	TLN2	83660	-34.8444	-17.4189	-0.0533444	4.15279e-06	2.0764e-06	0.999998	0.000568676	1	DownCRBM
ILMN_1730645	TMEFF2	23671	-21.9063	-6.92406	1.70656	0.00202862	0.00101431	0.998986	0.0329591	1	DownCRBM
ILMN_1748812	TMEM130	222865	-30.5634	-16.079	-2.33886	1.00752e-05	5.03761e-06	0.999995	0.000934719	1	DownCRBM
ILMN_1763612	TMEM132D	121256	-26.2728	-21.1461	-1.26133	1.00787e-05	5.03935e-06	0.999995	0.000934719	1	DownCRBM
ILMN_1709659	TMEM151	256472	-15.7199	-1.78262	-8.49763	0.0022962	0.0011481	0.998852	0.0360757	1	DownCRBM
ILMN_1809947	TMEM155	132332	-22.9672	-18.0466	-1.0346	5.92789e-05	2.96394e-05	0.99997	0.0029745	1	DownCRBM
ILMN_1704024	TMEM160	54958	-19.9523	-8.20931	2.81466	0.00285303	0.00142652	0.998573	0.0414755	1	DownCRBM
ILMN_1767154	TMEM16C	63982	-23.3289	-18.883	-6.6304	8.92584e-06	4.46292e-06	0.999996	0.000890016	1	DownCRBM
ILMN_1783583	TMEM17	200728	-17.407	-9.14568	0.746387	0.00249126	0.00124563	0.998754	0.0381145	1	DownCRBM
[truncated: 20,185 more rows]
