# Supplementary material for: The cerebellum ages slowly according to the epigenetic clock
Source: Aging (Albany NY). 2015 May 11;7(5):294–306. doi: 10.18632/aging.100742 (PMC4468311; doi:10.18632/aging.100742)
Supplement: Supplementary file 3 [file aging-07-0294-s003.xlsx]

## Sheet: DavidEASEQ05over
Annotation Cluster 1	Enrichment Score: 49.58356258695302
Category	Term	Count	%	PValue	Genes	List Total	Pop Hits	Pop Total	Fold Enrichment	Bonferroni	Benjamini	FDR
PUBMED_ID	18669648	351	29.0804	3.39112e-72	ILMN_1665414, ILMN_1661409, ILMN_1697670, ILMN_1758049, ILMN_1796912, ILMN_1760542, ILMN_1777745, ILMN_1796208, ILMN_1748077, ILMN_1747303, ILMN_1676159, ILMN_1668414, ILMN_1730631, ILMN_1779185, ILMN_1705114, ILMN_1663061, ILMN_1728556, ILMN_1743538, ILMN_1750256, ILMN_1651832, ILMN_1765091, ILMN_1683533, ILMN_1722345, ILMN_1688404, ILMN_1707175, ILMN_1667408, ILMN_1731648, ILMN_1693004, ILMN_18…	1207	2960	27491	2.70084	6.39938e-68	1.59984e-68	7.3552e-69
PUBMED_ID	17081983	233	19.3041	2.65157e-53	ILMN_1697670, ILMN_1758049, ILMN_1796912, ILMN_1777745, ILMN_1668414, ILMN_1779185, ILMN_1745917, ILMN_1705114, ILMN_1698441, ILMN_1663061, ILMN_1651832, ILMN_1722345, ILMN_1688404, ILMN_1781131, ILMN_1812934, ILMN_1708510, ILMN_1720850, ILMN_1695000, ILMN_1655497, ILMN_1697469, ILMN_1725992, ILMN_1697166, ILMN_1731358, ILMN_1750079, ILMN_1769473, ILMN_1734826, ILMN_1813635, ILMN_1716922, ILMN_17…	1207	1778	27491	2.98475	5.00377e-49	1.00075e-49	5.75115e-50
UP_TISSUE	Epithelium	296	24.5236	1.97454e-25	ILMN_1661409, ILMN_1697670, ILMN_1758049, ILMN_1796912, ILMN_1668414, ILMN_1779185, ILMN_1745917, ILMN_1705114, ILMN_1698441, ILMN_1728556, ILMN_1663061, ILMN_1651832, ILMN_1722345, ILMN_1781131, ILMN_1688404, ILMN_1722095, ILMN_1798061, ILMN_1693004, ILMN_1812934, ILMN_1720850, ILMN_1708510, ILMN_1695000, ILMN_1688000, ILMN_1655497, ILMN_1697469, ILMN_1697166, ILMN_1725992, ILMN_1731358, ILMN_17…	1178	2567	18201	1.78162	5.07458e-23	5.07458e-23	2.57626e-22
Annotation Cluster 2	Enrichment Score: 27.631672275329038
Category	Term	Count	%	PValue	Genes	List Total	Pop Hits	Pop Total	Fold Enrichment	Bonferroni	Benjamini	FDR
GOTERM_CC_FAT	GO:0031981~nuclear lumen	202	16.7357	1.27967e-37	ILMN_1782257, ILMN_1697670, ILMN_1697919, ILMN_1685631, ILMN_1668414, ILMN_1796710, ILMN_1698441, ILMN_1758823, ILMN_1781131, ILMN_1660844, ILMN_1695000, ILMN_1809890, ILMN_1664931, ILMN_1798533, ILMN_1731358, ILMN_1663954, ILMN_1679483, ILMN_1745365, ILMN_1710598, ILMN_1708764, ILMN_1721729, ILMN_1777526, ILMN_1763910, ILMN_1780937, ILMN_1710873, ILMN_1677532, ILMN_1679797, ILMN_1798354, ILMN_17…	712	1450	12782	2.50093	6.00164e-35	6.00164e-35	1.82618e-34
GOTERM_CC_FAT	GO:0070013~intracellular organelle lumen	225	18.6413	9.9223e-36	ILMN_1782257, ILMN_1697670, ILMN_1696675, ILMN_1697919, ILMN_1685631, ILMN_1668414, ILMN_1760174, ILMN_1709771, ILMN_1796710, ILMN_1698441, ILMN_1758823, ILMN_1781131, ILMN_1651719, ILMN_1799319, ILMN_1660844, ILMN_1695000, ILMN_1809890, ILMN_1664931, ILMN_1798533, ILMN_1731358, ILMN_1663954, ILMN_1679483, ILMN_1745365, ILMN_1710598, ILMN_1708764, ILMN_1721729, ILMN_1777526, ILMN_1780937, ILMN_17…	712	1779	12782	2.27052	4.65356e-33	2.32678e-33	1.41599e-32
GOTERM_CC_FAT	GO:0043233~organelle lumen	225	18.6413	3.59346e-34	ILMN_1782257, ILMN_1697670, ILMN_1696675, ILMN_1697919, ILMN_1685631, ILMN_1668414, ILMN_1760174, ILMN_1709771, ILMN_1796710, ILMN_1698441, ILMN_1758823, ILMN_1781131, ILMN_1651719, ILMN_1799319, ILMN_1660844, ILMN_1695000, ILMN_1809890, ILMN_1664931, ILMN_1798533, ILMN_1731358, ILMN_1663954, ILMN_1679483, ILMN_1745365, ILMN_1710598, ILMN_1708764, ILMN_1721729, ILMN_1777526, ILMN_1780937, ILMN_17…	712	1820	12782	2.21937	1.68533e-31	5.61778e-32	5.12815e-31
GOTERM_CC_FAT	GO:0031974~membrane-enclosed lumen	226	18.7241	2.53877e-33	ILMN_1782257, ILMN_1697670, ILMN_1696675, ILMN_1697919, ILMN_1685631, ILMN_1668414, ILMN_1760174, ILMN_1709771, ILMN_1796710, ILMN_1698441, ILMN_1758823, ILMN_1781131, ILMN_1651719, ILMN_1799319, ILMN_1660844, ILMN_1695000, ILMN_1809890, ILMN_1664931, ILMN_1798533, ILMN_1731358, ILMN_1663954, ILMN_1679483, ILMN_1745365, ILMN_1710598, ILMN_1708764, ILMN_1721729, ILMN_1777526, ILMN_1780937, ILMN_17…	712	1856	12782	2.186	1.19068e-30	2.97671e-31	3.62303e-30
GOTERM_CC_FAT	GO:0005654~nucleoplasm	125	10.3563	5.07577e-23	ILMN_1691294, ILMN_1651942, ILMN_1697670, ILMN_1715392, ILMN_1740216, ILMN_1685631, ILMN_1660368, ILMN_1673023, ILMN_1668414, ILMN_1698441, ILMN_1786021, ILMN_1758823, ILMN_1781131, ILMN_1767894, ILMN_1756787, ILMN_1696407, ILMN_1697117, ILMN_1660844, ILMN_1746276, ILMN_1695000, ILMN_1809890, ILMN_1664931, ILMN_1775637, ILMN_1663954, ILMN_1725121, ILMN_1730019, ILMN_1679483, ILMN_1745365, ILMN_17…	712	882	12782	2.54425	2.38054e-20	4.76108e-21	7.24352e-20
GOTERM_CC_FAT	GO:0005730~nucleolus	101	8.36785	3.58622e-19	ILMN_1782257, ILMN_1697286, ILMN_1799796, ILMN_1697919, ILMN_1754643, ILMN_1673023, ILMN_1676010, ILMN_1796710, ILMN_1738681, ILMN_1736080, ILMN_1688971, ILMN_1758823, ILMN_1805344, ILMN_1756787, ILMN_1741976, ILMN_1797341, ILMN_1682095, ILMN_1768273, ILMN_1809890, ILMN_1802611, ILMN_1798533, ILMN_1801869, ILMN_1731358, ILMN_1775637, ILMN_1725121, ILMN_1676737, ILMN_1708764, ILMN_1762085, ILMN_17…	712	698	12782	2.59767	1.68194e-16	2.80323e-17	5.11781e-16
GOTERM_CC_FAT	GO:0044451~nucleoplasm part	81	6.71085	1.79601e-15	ILMN_1691294, ILMN_1686626, ILMN_1754923, ILMN_1697670, ILMN_1715392, ILMN_1771264, ILMN_1688034, ILMN_1718629, ILMN_1740216, ILMN_1810488, ILMN_1660368, ILMN_1673023, ILMN_1669142, ILMN_1761828, ILMN_1697639, ILMN_1698441, ILMN_1701855, ILMN_1744986, ILMN_1813603, ILMN_1764460, ILMN_1696407, ILMN_1697117, ILMN_1666399, ILMN_1810474, ILMN_1798602, ILMN_1675497, ILMN_1660844, ILMN_1746276, ILMN_17…	712	555	12782	2.62006	8.33111e-13	1.19016e-13	2.53131e-12
Annotation Cluster 3	Enrichment Score: 16.70813016296212
Category	Term	Count	%	PValue	Genes	List Total	Pop Hits	Pop Total	Fold Enrichment	Bonferroni	Benjamini	FDR
SP_PIR_KEYWORDS	nucleus	525	43.4963	7.05863e-66	ILMN_1758049, ILMN_1717154, ILMN_1747303, ILMN_1723886, ILMN_1728230, ILMN_1660551, ILMN_1743538, ILMN_1758823, ILMN_1667408, ILMN_1699049, ILMN_1728228, ILMN_1660844, ILMN_1708510, ILMN_1695000, ILMN_1688000, ILMN_1809890, ILMN_1762275, ILMN_1690206, ILMN_1740842, ILMN_1798533, ILMN_1655167, ILMN_1731358, ILMN_1732885, ILMN_1769473, ILMN_1759008, ILMN_1734254, ILMN_1734826, ILMN_1725889, ILMN_16…	1200	4283	19235	1.96482	3.30344e-63	3.30344e-63	1.00702e-62
SP_PIR_KEYWORDS	zinc-finger	236	19.5526	9.18245e-33	ILMN_1665414, ILMN_1697919, ILMN_1763641, ILMN_1725862, ILMN_1707872, ILMN_1796208, ILMN_1748077, ILMN_1723886, ILMN_1728230, ILMN_1718950, ILMN_1668414, ILMN_1663160, ILMN_1792078, ILMN_1796710, ILMN_1698441, ILMN_1743538, ILMN_1688404, ILMN_1707175, ILMN_1784281, ILMN_1664928, ILMN_1798061, ILMN_1699049, ILMN_1697735, ILMN_1728228, ILMN_1812934, ILMN_1720850, ILMN_1744676, ILMN_1739641, ILMN_18…	1200	1718	19235	2.20191	4.29739e-30	1.43246e-30	1.31001e-29
SP_PIR_KEYWORDS	Transcription	266	22.0381	2.76934e-32	ILMN_1705218, ILMN_1697919, ILMN_1758049, ILMN_1763641, ILMN_1796208, ILMN_1723886, ILMN_1728230, ILMN_1718950, ILMN_1668414, ILMN_1663160, ILMN_1698441, ILMN_1743538, ILMN_1758823, ILMN_1707175, ILMN_1784281, ILMN_1664928, ILMN_1731648, ILMN_1699049, ILMN_1697735, ILMN_1728228, ILMN_1720850, ILMN_1809890, ILMN_1804610, ILMN_1740842, ILMN_1714283, ILMN_1798533, ILMN_1664931, ILMN_1655167, ILMN_17…	1200	2071	19235	2.05879	1.29605e-29	3.24013e-30	3.95087e-29
SP_PIR_KEYWORDS	transcription regulation	258	21.3753	1.27141e-30	ILMN_1697919, ILMN_1758049, ILMN_1763641, ILMN_1796208, ILMN_1723886, ILMN_1728230, ILMN_1718950, ILMN_1668414, ILMN_1663160, ILMN_1698441, ILMN_1743538, ILMN_1758823, ILMN_1707175, ILMN_1784281, ILMN_1664928, ILMN_1731648, ILMN_1699049, ILMN_1697735, ILMN_1728228, ILMN_1720850, ILMN_1809890, ILMN_1804610, ILMN_1740842, ILMN_1714283, ILMN_1798533, ILMN_1664931, ILMN_1655167, ILMN_1731358, ILMN_16…	1200	2026	19235	2.04123	5.95018e-28	1.19004e-28	1.81385e-27
GOTERM_BP_FAT	GO:0006350~transcription	265	21.9553	3.50561e-29	ILMN_1705218, ILMN_1697919, ILMN_1758049, ILMN_1763641, ILMN_1796208, ILMN_1723886, ILMN_1728230, ILMN_1718950, ILMN_1668414, ILMN_1663160, ILMN_1698441, ILMN_1758823, ILMN_1707175, ILMN_1784281, ILMN_1664928, ILMN_1731648, ILMN_1699049, ILMN_1697735, ILMN_1728228, ILMN_1812934, ILMN_1720850, ILMN_1809890, ILMN_1804610, ILMN_1740842, ILMN_1714283, ILMN_1798533, ILMN_1664931, ILMN_1655167, ILMN_17…	886	2101	13528	1.92584	9.4967e-26	9.4967e-26	6.24072e-26
SP_PIR_KEYWORDS	zinc	258	21.3753	2.03572e-25	ILMN_1665414, ILMN_1697919, ILMN_1763641, ILMN_1725862, ILMN_1707872, ILMN_1796208, ILMN_1748077, ILMN_1723886, ILMN_1800642, ILMN_1728230, ILMN_1718950, ILMN_1668414, ILMN_1663160, ILMN_1792078, ILMN_1796710, ILMN_1698441, ILMN_1743538, ILMN_1688404, ILMN_1707175, ILMN_1784281, ILMN_1664928, ILMN_1798061, ILMN_1699049, ILMN_1697735, ILMN_1728228, ILMN_1812934, ILMN_1720850, ILMN_1744676, ILMN_17…	1200	2189	19235	1.88923	9.52715e-23	1.58786e-23	2.90424e-22
GOTERM_BP_FAT	GO:0045449~regulation of transcription	287	23.778	2.97538e-22	ILMN_1705218, ILMN_1697919, ILMN_1758049, ILMN_1763641, ILMN_1796208, ILMN_1723886, ILMN_1728230, ILMN_1718950, ILMN_1668414, ILMN_1745917, ILMN_1663160, ILMN_1698441, ILMN_1663061, ILMN_1758823, ILMN_1781131, ILMN_1707175, ILMN_1784281, ILMN_1664928, ILMN_1731648, ILMN_1699049, ILMN_1697735, ILMN_1728228, ILMN_1720850, ILMN_1708510, ILMN_1809890, ILMN_1804610, ILMN_1740842, ILMN_1714283, ILMN_17…	886	2601	13528	1.68477	8.06031e-19	4.03015e-19	5.2968e-19
SP_PIR_KEYWORDS	metal-binding	309	25.6007	9.5344e-22	ILMN_1665414, ILMN_1697919, ILMN_1763641, ILMN_1725862, ILMN_1714167, ILMN_1707872, ILMN_1796208, ILMN_1748077, ILMN_1723886, ILMN_1676159, ILMN_1800642, ILMN_1728230, ILMN_1718950, ILMN_1668414, ILMN_1663160, ILMN_1782057, ILMN_1792078, ILMN_1796710, ILMN_1698441, ILMN_1743538, ILMN_1789793, ILMN_1711049, ILMN_1688404, ILMN_1707175, ILMN_1784281, ILMN_1664928, ILMN_1798061, ILMN_1699049, ILMN_16…	1200	2972	19235	1.66656	4.4621e-19	5.57762e-20	1.36022e-18
UP_SEQ_FEATURE	zinc finger region:C2H2-type 5	98	8.1193	1.06622e-21	ILMN_1756795, ILMN_1711361, ILMN_1772522, ILMN_1763641, ILMN_1759375, ILMN_1723886, ILMN_1728230, ILMN_1718950, ILMN_1725679, ILMN_1663160, ILMN_1674399, ILMN_1696339, ILMN_1784281, ILMN_1664928, ILMN_1699049, ILMN_1728228, ILMN_1810832, ILMN_1740842, ILMN_1798533, ILMN_1687981, ILMN_1655167, ILMN_1731358, ILMN_1664292, ILMN_1669696, ILMN_1759008, ILMN_1738124, ILMN_1734254, ILMN_1658080, ILMN_16…	1199	538	19113	2.90371	3.19546e-18	1.59773e-18	1.9197e-18
GOTERM_MF_FAT	GO:0003677~DNA binding	268	22.2038	1.16143e-21	ILMN_1697670, ILMN_1758049, ILMN_1763641, ILMN_1796208, ILMN_1723886, ILMN_1728230, ILMN_1718950, ILMN_1668414, ILMN_1745917, ILMN_1663160, ILMN_1796710, ILMN_1698441, ILMN_1663061, ILMN_1660551, ILMN_1743538, ILMN_1781131, ILMN_1688404, ILMN_1784281, ILMN_1664928, ILMN_1731648, ILMN_1699049, ILMN_1697735, ILMN_1728228, ILMN_1720850, ILMN_1809890, ILMN_1804610, ILMN_1740842, ILMN_1798533, ILMN_16…	872	2331	12983	1.71179	9.83731e-19	9.83731e-19	1.79617e-18
GOTERM_MF_FAT	GO:0008270~zinc ion binding	265	21.9553	3.2618e-21	ILMN_1665414, ILMN_1697919, ILMN_1763641, ILMN_1725862, ILMN_1707872, ILMN_1796208, ILMN_1748077, ILMN_1723886, ILMN_1800642, ILMN_1728230, ILMN_1718950, ILMN_1668414, ILMN_1663160, ILMN_1792078, ILMN_1796710, ILMN_1698441, ILMN_1743538, ILMN_1688404, ILMN_1707175, ILMN_1784281, ILMN_1664928, ILMN_1798061, ILMN_1699049, ILMN_1697735, ILMN_1728228, ILMN_1812934, ILMN_1720850, ILMN_1813846, ILMN_17…	872	2311	12983	1.70728	2.76274e-18	1.38137e-18	5.04441e-18
INTERPRO	IPR015880:Zinc finger, C2H2-like	126	10.4391	4.35999e-21	ILMN_1756795, ILMN_1740490, ILMN_1711361, ILMN_1772522, ILMN_1763641, ILMN_1759375, ILMN_1796208, ILMN_1723886, ILMN_1728230, ILMN_1676010, ILMN_1718950, ILMN_1725679, ILMN_1663160, ILMN_1674399, ILMN_1792078, ILMN_1706342, ILMN_1729976, ILMN_1696339, ILMN_1664928, ILMN_1784281, ILMN_1770400, ILMN_1699049, ILMN_1728228, ILMN_1810832, ILMN_1740842, ILMN_1798533, ILMN_1687981, ILMN_1655167, ILMN_17…	1081	797	16659	2.43633	6.17811e-18	6.17811e-18	7.1944e-18
INTERPRO	IPR007087:Zinc finger, C2H2-type	123	10.1906	2.61137e-20	ILMN_1756795, ILMN_1740490, ILMN_1711361, ILMN_1772522, ILMN_1763641, ILMN_1759375, ILMN_1796208, ILMN_1723886, ILMN_1728230, ILMN_1676010, ILMN_1718950, ILMN_1725679, ILMN_1663160, ILMN_1674399, ILMN_1706342, ILMN_1729976, ILMN_1696339, ILMN_1664928, ILMN_1784281, ILMN_1699049, ILMN_1728228, ILMN_1810832, ILMN_1740842, ILMN_1767892, ILMN_1798533, ILMN_1687981, ILMN_1655167, ILMN_1731358, ILMN_17…	1081	784	16659	2.41775	3.70031e-17	1.85015e-17	4.309e-17
INTERPRO	IPR013087:Zinc finger, C2H2-type/integrase, DNA-binding	105	8.69925	9.25972e-20	ILMN_1756795, ILMN_1740490, ILMN_1711361, ILMN_1772522, ILMN_1763641, ILMN_1759375, ILMN_1796208, ILMN_1723886, ILMN_1728230, ILMN_1676010, ILMN_1718950, ILMN_1725679, ILMN_1663160, ILMN_1674399, ILMN_1706342, ILMN_1696339, ILMN_1784281, ILMN_1664928, ILMN_1699049, ILMN_1728228, ILMN_1810832, ILMN_1798533, ILMN_1687981, ILMN_1655167, ILMN_1710092, ILMN_1664292, ILMN_1669696, ILMN_1759008, ILMN_17…	1081	621	16659	2.60568	1.3121e-16	4.37367e-17	1.52794e-16
UP_SEQ_FEATURE	zinc finger region:C2H2-type 3	103	8.53355	1.18481e-19	ILMN_1756795, ILMN_1740490, ILMN_1711361, ILMN_1772522, ILMN_1763641, ILMN_1759375, ILMN_1796208, ILMN_1723886, ILMN_1676010, ILMN_1718950, ILMN_1725679, ILMN_1663160, ILMN_1674399, ILMN_1706342, ILMN_1696339, ILMN_1784281, ILMN_1664928, ILMN_1699049, ILMN_1728228, ILMN_1810832, ILMN_1740842, ILMN_1798533, ILMN_1687981, ILMN_1655167, ILMN_1731358, ILMN_1664292, ILMN_1669696, ILMN_1759008, ILMN_17…	1199	622	19113	2.63971	3.55088e-16	1.18363e-16	2.13322e-16
UP_SEQ_FEATURE	zinc finger region:C2H2-type 4	97	8.03645	4.23371e-19	ILMN_1756795, ILMN_1740490, ILMN_1711361, ILMN_1772522, ILMN_1763641, ILMN_1759375, ILMN_1723886, ILMN_1728230, ILMN_1718950, ILMN_1725679, ILMN_1663160, ILMN_1674399, ILMN_1706342, ILMN_1696339, ILMN_1784281, ILMN_1664928, ILMN_1699049, ILMN_1728228, ILMN_1810832, ILMN_1740842, ILMN_1798533, ILMN_1687981, ILMN_1655167, ILMN_1731358, ILMN_1664292, ILMN_1669696, ILMN_1759008, ILMN_1738124, ILMN_17…	1199	575	19113	2.68914	1.26884e-15	3.17211e-16	7.62268e-16
SP_PIR_KEYWORDS	dna-binding	212	17.5642	1.00047e-18	ILMN_1697670, ILMN_1758049, ILMN_1763641, ILMN_1796208, ILMN_1723886, ILMN_1728230, ILMN_1718950, ILMN_1668414, ILMN_1663160, ILMN_1796710, ILMN_1663061, ILMN_1660551, ILMN_1743538, ILMN_1781131, ILMN_1784281, ILMN_1664928, ILMN_1731648, ILMN_1699049, ILMN_1697735, ILMN_1728228, ILMN_1720850, ILMN_1804610, ILMN_1740842, ILMN_1664931, ILMN_1798533, ILMN_1655167, ILMN_1731358, ILMN_1750079, ILMN_17…	1200	1868	19235	1.81916	4.68219e-16	4.68219e-17	1.42731e-15
GOTERM_MF_FAT	GO:0046914~transition metal ion binding	295	24.4408	1.11893e-18	ILMN_1782257, ILMN_1665414, ILMN_1697919, ILMN_1763641, ILMN_1725862, ILMN_1714167, ILMN_1707872, ILMN_1796208, ILMN_1748077, ILMN_1723886, ILMN_1800642, ILMN_1728230, ILMN_1718950, ILMN_1668414, ILMN_1663160, ILMN_1792078, ILMN_1796710, ILMN_1698441, ILMN_1743538, ILMN_1688404, ILMN_1707175, ILMN_1784281, ILMN_1664928, ILMN_1798061, ILMN_1699049, ILMN_1697735, ILMN_1669015, ILMN_1728228, ILMN_18…	872	2785	12983	1.57709	9.47734e-16	3.15911e-16	1.73044e-15
UP_SEQ_FEATURE	zinc finger region:C2H2-type 6	86	7.1251	3.41516e-18	ILMN_1757408, ILMN_1756795, ILMN_1737314, ILMN_1651905, ILMN_1740490, ILMN_1711361, ILMN_1778560, ILMN_1763641, ILMN_1786601, ILMN_1759375, ILMN_1667322, ILMN_1723886, ILMN_1728230, ILMN_1718950, ILMN_1725679, ILMN_1663160, ILMN_1719646, ILMN_1688638, ILMN_1674399, ILMN_1801156, ILMN_1728710, ILMN_1685467, ILMN_1744986, ILMN_1760982, ILMN_1664928, ILMN_1784281, ILMN_1782079, ILMN_1761409, ILMN_17…	1199	488	19113	2.80924	1.02352e-14	2.04705e-15	6.14891e-15
UP_SEQ_FEATURE	zinc finger region:C2H2-type 8	77	6.37945	1.58607e-17	ILMN_1757408, ILMN_1756795, ILMN_1651905, ILMN_1740490, ILMN_1711361, ILMN_1778560, ILMN_1763641, ILMN_1759375, ILMN_1667322, ILMN_1723886, ILMN_1728230, ILMN_1718950, ILMN_1725679, ILMN_1663160, ILMN_1719646, ILMN_1688638, ILMN_1801156, ILMN_1728710, ILMN_1685467, ILMN_1744986, ILMN_1760982, ILMN_1664928, ILMN_1784281, ILMN_1782079, ILMN_1761409, ILMN_1764891, ILMN_1699049, ILMN_1683487, ILMN_17…	1199	417	19113	2.9435	4.75346e-14	7.92243e-15	2.85568e-14
UP_SEQ_FEATURE	zinc finger region:C2H2-type 7	79	6.54515	1.27704e-16	ILMN_1757408, ILMN_1756795, ILMN_1651905, ILMN_1740490, ILMN_1778560, ILMN_1763641, ILMN_1759375, ILMN_1667322, ILMN_1723886, ILMN_1728230, ILMN_1718950, ILMN_1725679, ILMN_1663160, ILMN_1719646, ILMN_1688638, ILMN_1674399, ILMN_1801156, ILMN_1728710, ILMN_1685467, ILMN_1744986, ILMN_1760982, ILMN_1664928, ILMN_1784281, ILMN_1782079, ILMN_1761409, ILMN_1764891, ILMN_1699049, ILMN_1683487, ILMN_17…	1199	451	19113	2.79229	3.32734e-13	4.75175e-14	1.9984e-13
SMART	SM00355:ZnF_C2H2	126	10.4391	8.00545e-16	ILMN_1756795, ILMN_1740490, ILMN_1711361, ILMN_1772522, ILMN_1763641, ILMN_1759375, ILMN_1796208, ILMN_1723886, ILMN_1728230, ILMN_1676010, ILMN_1718950, ILMN_1725679, ILMN_1663160, ILMN_1674399, ILMN_1792078, ILMN_1706342, ILMN_1729976, ILMN_1696339, ILMN_1664928, ILMN_1784281, ILMN_1770400, ILMN_1699049, ILMN_1728228, ILMN_1810832, ILMN_1740842, ILMN_1798533, ILMN_1687981, ILMN_1655167, ILMN_17…	696	797	9079	2.06225	2.30815e-13	2.30815e-13	1.03251e-12
UP_SEQ_FEATURE	zinc finger region:C2H2-type 2	93	7.70505	2.12572e-15	ILMN_1757408, ILMN_1756795, ILMN_1737314, ILMN_1651905, ILMN_1740490, ILMN_1772522, ILMN_1778560, ILMN_1774387, ILMN_1786601, ILMN_1759375, ILMN_1731113, ILMN_1667322, ILMN_1796208, ILMN_1723886, ILMN_1728230, ILMN_1815309, ILMN_1676010, ILMN_1718950, ILMN_1725679, ILMN_1663160, ILMN_1719646, ILMN_1688638, ILMN_1674399, ILMN_1801156, ILMN_1728710, ILMN_1706342, ILMN_1802758, ILMN_1685467, ILMN_17…	1199	608	19113	2.43831	6.32194e-12	7.90257e-13	3.79696e-12
UP_SEQ_FEATURE	zinc finger region:C2H2-type 10	63	5.21955	8.75075e-15	ILMN_1757408, ILMN_1756795, ILMN_1740490, ILMN_1711361, ILMN_1763641, ILMN_1759375, ILMN_1723886, ILMN_1728230, ILMN_1718950, ILMN_1725679, ILMN_1663160, ILMN_1688638, ILMN_1801156, ILMN_1728710, ILMN_1664928, ILMN_1784281, ILMN_1782079, ILMN_1761409, ILMN_1683487, ILMN_1759017, ILMN_1728228, ILMN_1810832, ILMN_1811195, ILMN_1731813, ILMN_1748527, ILMN_1663754, ILMN_1655167, ILMN_1687981, ILMN_16…	1199	334	19113	3.00679	2.6286e-11	2.92066e-12	1.57874e-11
UP_SEQ_FEATURE	zinc finger region:C2H2-type 9	67	5.55095	1.95562e-14	ILMN_1757408, ILMN_1756795, ILMN_1740490, ILMN_1711361, ILMN_1763641, ILMN_1759375, ILMN_1723886, ILMN_1728230, ILMN_1718950, ILMN_1725679, ILMN_1663160, ILMN_1719646, ILMN_1688638, ILMN_1801156, ILMN_1728710, ILMN_1685467, ILMN_1664928, ILMN_1784281, ILMN_1782079, ILMN_1761409, ILMN_1683487, ILMN_1759017, ILMN_1728228, ILMN_1810832, ILMN_1811195, ILMN_1672357, ILMN_1748527, ILMN_1731813, ILMN_16…	1199	376	19113	2.84051	5.85612e-11	5.85609e-12	3.5183e-11
UP_SEQ_FEATURE	zinc finger region:C2H2-type 1	82	6.7937	2.10595e-13	ILMN_1757408, ILMN_1737314, ILMN_1740490, ILMN_1772522, ILMN_1711361, ILMN_1778560, ILMN_1774387, ILMN_1786601, ILMN_1759375, ILMN_1796208, ILMN_1723886, ILMN_1815309, ILMN_1676010, ILMN_1718950, ILMN_1725679, ILMN_1719646, ILMN_1688638, ILMN_1674399, ILMN_1757262, ILMN_1801156, ILMN_1728710, ILMN_1802758, ILMN_1685467, ILMN_1744986, ILMN_1664928, ILMN_1784281, ILMN_1782079, ILMN_1761409, ILMN_17…	1199	542	19113	2.41171	6.31196e-10	5.73814e-11	3.79197e-10
GOTERM_BP_FAT	GO:0051252~regulation of RNA metabolic process	194	16.0729	7.98889e-13	ILMN_1705218, ILMN_1758049, ILMN_1763641, ILMN_1796208, ILMN_1728230, ILMN_1718950, ILMN_1745917, ILMN_1663160, ILMN_1698441, ILMN_1663061, ILMN_1758823, ILMN_1781131, ILMN_1707175, ILMN_1664928, ILMN_1784281, ILMN_1731648, ILMN_1699049, ILMN_1697735, ILMN_1728228, ILMN_1708510, ILMN_1809890, ILMN_1804610, ILMN_1740842, ILMN_1750079, ILMN_1750075, ILMN_1759008, ILMN_1738124, ILMN_1658080, ILMN_17…	886	1813	13528	1.63382	2.16426e-09	2.40474e-10	1.42224e-09
UP_SEQ_FEATURE	zinc finger region:C2H2-type 11	54	4.4739	2.25596e-12	ILMN_1757408, ILMN_1740490, ILMN_1763641, ILMN_1759375, ILMN_1723886, ILMN_1728230, ILMN_1718950, ILMN_1725679, ILMN_1663160, ILMN_1801156, ILMN_1728710, ILMN_1784281, ILMN_1664928, ILMN_1782079, ILMN_1761409, ILMN_1683487, ILMN_1728228, ILMN_1810832, ILMN_1811195, ILMN_1731813, ILMN_1748527, ILMN_1655167, ILMN_1687981, ILMN_1731358, ILMN_1664292, ILMN_1707596, ILMN_1669696, ILMN_1759008, ILMN_17…	1199	293	19113	2.93789	6.76115e-09	5.63429e-10	4.06182e-09
GOTERM_BP_FAT	GO:0006355~regulation of transcription, DNA-dependent	189	15.6587	2.5742e-12	ILMN_1705218, ILMN_1758049, ILMN_1763641, ILMN_1796208, ILMN_1728230, ILMN_1718950, ILMN_1745917, ILMN_1663160, ILMN_1698441, ILMN_1663061, ILMN_1758823, ILMN_1781131, ILMN_1707175, ILMN_1784281, ILMN_1664928, ILMN_1731648, ILMN_1699049, ILMN_1697735, ILMN_1728228, ILMN_1708510, ILMN_1809890, ILMN_1804610, ILMN_1740842, ILMN_1750079, ILMN_1750075, ILMN_1759008, ILMN_1738124, ILMN_1745365, ILMN_16…	886	1773	13528	1.62762	6.97341e-09	6.97341e-10	4.58255e-09
UP_SEQ_FEATURE	domain:KRAB	58	4.8053	3.10652e-12	ILMN_1757408, ILMN_1756795, ILMN_1740490, ILMN_1778560, ILMN_1763641, ILMN_1759375, ILMN_1667322, ILMN_1718950, ILMN_1725679, ILMN_1663160, ILMN_1719646, ILMN_1728710, ILMN_1706342, ILMN_1744986, ILMN_1784281, ILMN_1664928, ILMN_1761409, ILMN_1699049, ILMN_1683487, ILMN_1789364, ILMN_1728228, ILMN_1810832, ILMN_1811195, ILMN_1731813, ILMN_1663754, ILMN_1687981, ILMN_1707596, ILMN_1669696, ILMN_17…	1199	332	19113	2.78484	9.31023e-09	7.16171e-10	5.59319e-09
UP_SEQ_FEATURE	zinc finger region:C2H2-type 12	47	3.89395	4.68414e-11	ILMN_1757408, ILMN_1664292, ILMN_1707596, ILMN_1669696, ILMN_1740490, ILMN_1709377, ILMN_1711361, ILMN_1741313, ILMN_1763641, ILMN_1759375, ILMN_1658080, ILMN_1723886, ILMN_1716921, ILMN_1728230, ILMN_1718950, ILMN_1663160, ILMN_1793578, ILMN_1679747, ILMN_1815885, ILMN_1672743, ILMN_1801156, ILMN_1728710, ILMN_1656504, ILMN_1664096, ILMN_1734608, ILMN_1784281, ILMN_1664928, ILMN_1672135, ILMN_17…	1199	252	19113	2.97308	1.40384e-07	9.35892e-09	8.43367e-08
INTERPRO	IPR001909:Krueppel-associated box	59	4.88815	5.67818e-11	ILMN_1756795, ILMN_1740490, ILMN_1778560, ILMN_1763641, ILMN_1759375, ILMN_1667322, ILMN_1815309, ILMN_1728230, ILMN_1718950, ILMN_1725679, ILMN_1663160, ILMN_1719646, ILMN_1728710, ILMN_1706342, ILMN_1744986, ILMN_1784281, ILMN_1664928, ILMN_1761409, ILMN_1699049, ILMN_1683487, ILMN_1759017, ILMN_1789364, ILMN_1728228, ILMN_1810832, ILMN_1811195, ILMN_1731813, ILMN_1663754, ILMN_1687981, ILMN_17…	1081	355	16659	2.56122	8.04598e-08	1.341e-08	9.36954e-08
GOTERM_MF_FAT	GO:0046872~metal ion binding	354	29.3289	1.64303e-08	ILMN_1782257, ILMN_1665414, ILMN_1697919, ILMN_1714167, ILMN_1763641, ILMN_1725862, ILMN_1707872, ILMN_1796208, ILMN_1748077, ILMN_1723886, ILMN_1676159, ILMN_1800642, ILMN_1728230, ILMN_1718950, ILMN_1668414, ILMN_1663160, ILMN_1782057, ILMN_1792078, ILMN_1796710, ILMN_1698441, ILMN_1743538, ILMN_1651832, ILMN_1733669, ILMN_1789793, ILMN_1711049, ILMN_1688404, ILMN_1707175, ILMN_1784281, ILMN_16…	872	4140	12983	1.2731	1.39163e-05	2.3194e-06	2.54096e-05
SMART	SM00349:KRAB	59	4.88815	1.96648e-08	ILMN_1756795, ILMN_1740490, ILMN_1778560, ILMN_1763641, ILMN_1759375, ILMN_1667322, ILMN_1815309, ILMN_1728230, ILMN_1718950, ILMN_1725679, ILMN_1663160, ILMN_1719646, ILMN_1728710, ILMN_1706342, ILMN_1744986, ILMN_1784281, ILMN_1664928, ILMN_1761409, ILMN_1699049, ILMN_1683487, ILMN_1759017, ILMN_1789364, ILMN_1728228, ILMN_1810832, ILMN_1811195, ILMN_1731813, ILMN_1663754, ILMN_1687981, ILMN_17…	696	355	9079	2.16797	5.84043e-06	1.46011e-06	2.62378e-05
GOTERM_MF_FAT	GO:0043169~cation binding	356	29.4946	2.24367e-08	ILMN_1782257, ILMN_1665414, ILMN_1697919, ILMN_1714167, ILMN_1763641, ILMN_1725862, ILMN_1707872, ILMN_1796208, ILMN_1748077, ILMN_1723886, ILMN_1676159, ILMN_1800642, ILMN_1728230, ILMN_1718950, ILMN_1668414, ILMN_1663160, ILMN_1782057, ILMN_1792078, ILMN_1796710, ILMN_1698441, ILMN_1743538, ILMN_1651832, ILMN_1733669, ILMN_1789793, ILMN_1711049, ILMN_1688404, ILMN_1707175, ILMN_1784281, ILMN_16…	872	4179	12983	1.26834	1.90037e-05	2.71483e-06	3.46986e-05
PIR_SUPERFAMILY	PIRSF005559:zinc finger protein ZFP-36	26	2.1541	2.82922e-08	ILMN_1756795, ILMN_1707596, ILMN_1740490, ILMN_1763641, ILMN_1759375, ILMN_1688515, ILMN_1716921, ILMN_1728230, ILMN_1663160, ILMN_1793578, ILMN_1744986, ILMN_1713454, ILMN_1734608, ILMN_1664928, ILMN_1763208, ILMN_1784281, ILMN_1699049, ILMN_1728228, ILMN_1670377, ILMN_1810832, ILMN_1757230, ILMN_1677785, ILMN_1680693, ILMN_1663754, ILMN_1792972, ILMN_1687981	386	137	7396	3.63632	1.19393e-05	1.19393e-05	3.97695e-05
GOTERM_MF_FAT	GO:0043167~ion binding	359	29.7432	3.96288e-08	ILMN_1782257, ILMN_1665414, ILMN_1697919, ILMN_1714167, ILMN_1763641, ILMN_1725862, ILMN_1707872, ILMN_1796208, ILMN_1748077, ILMN_1723886, ILMN_1676159, ILMN_1800642, ILMN_1728230, ILMN_1718950, ILMN_1668414, ILMN_1663160, ILMN_1782057, ILMN_1792078, ILMN_1796710, ILMN_1698441, ILMN_1743538, ILMN_1651832, ILMN_1733669, ILMN_1789793, ILMN_1711049, ILMN_1688404, ILMN_1707175, ILMN_1784281, ILMN_16…	872	4241	12983	1.26033	3.3565e-05	4.19569e-06	6.12864e-05
GOTERM_MF_FAT	GO:0030528~transcription regulator activity	152	12.5932	1.78209e-07	ILMN_1814173, ILMN_1691294, ILMN_1670695, ILMN_1758049, ILMN_1759375, ILMN_1660368, ILMN_1745994, ILMN_1796208, ILMN_1676010, ILMN_1745917, ILMN_1674399, ILMN_1701957, ILMN_1764177, ILMN_1663061, ILMN_1698441, ILMN_1743538, ILMN_1738681, ILMN_1805344, ILMN_1707175, ILMN_1781131, ILMN_1682197, ILMN_1696407, ILMN_1697117, ILMN_1731648, ILMN_1697735, ILMN_1797341, ILMN_1746276, ILMN_1809890, ILMN_16…	872	1512	12983	1.49675	0.000150931	1.50942e-05	0.000275602
UP_SEQ_FEATURE	zinc finger region:C2H2-type 13	34	2.8169	3.40706e-07	ILMN_1757408, ILMN_1669696, ILMN_1740490, ILMN_1709377, ILMN_1741313, ILMN_1759375, ILMN_1658080, ILMN_1723886, ILMN_1716921, ILMN_1728230, ILMN_1663160, ILMN_1815885, ILMN_1672743, ILMN_1801156, ILMN_1728710, ILMN_1656504, ILMN_1664096, ILMN_1664928, ILMN_1784281, ILMN_1672135, ILMN_1782079, ILMN_1761409, ILMN_1675788, ILMN_1670377, ILMN_1749838, ILMN_1742935, ILMN_1676745, ILMN_1757230, ILMN_18…	1199	201	19113	2.69645	0.00102058	6.00627e-05	0.000613431
UP_SEQ_FEATURE	zinc finger region:C2H2-type 14	28	2.3198	1.5548e-06	ILMN_1757408, ILMN_1741313, ILMN_1709377, ILMN_1711361, ILMN_1759375, ILMN_1658080, ILMN_1716921, ILMN_1728230, ILMN_1718950, ILMN_1663160, ILMN_1815885, ILMN_1679747, ILMN_1672743, ILMN_1801156, ILMN_1728710, ILMN_1656504, ILMN_1664928, ILMN_1784281, ILMN_1672135, ILMN_1675788, ILMN_1670377, ILMN_1742935, ILMN_1676745, ILMN_1806782, ILMN_1748527, ILMN_1731813, ILMN_1663754, ILMN_1655167	1199	157	19113	2.84294	0.00464889	0.000245219	0.00279933
UP_SEQ_FEATURE	zinc finger region:C2H2-type 15	23	1.90555	2.97352e-05	ILMN_1757408, ILMN_1784281, ILMN_1672135, ILMN_1709377, ILMN_1741313, ILMN_1711361, ILMN_1675788, ILMN_1670377, ILMN_1658080, ILMN_1742935, ILMN_1716921, ILMN_1728230, ILMN_1718950, ILMN_1663160, ILMN_1806782, ILMN_1676745, ILMN_1815885, ILMN_1679747, ILMN_1748527, ILMN_1731813, ILMN_1663754, ILMN_1728710, ILMN_1656504	1199	134	19113	2.7361	0.0852621	0.00355836	0.0535238
GOTERM_MF_FAT	GO:0003700~transcription factor activity	93	7.70505	0.000442434	ILMN_1670695, ILMN_1758049, ILMN_1759375, ILMN_1745994, ILMN_1676010, ILMN_1745917, ILMN_1701957, ILMN_1743538, ILMN_1781131, ILMN_1682197, ILMN_1697117, ILMN_1731648, ILMN_1697735, ILMN_1804610, ILMN_1802611, ILMN_1740842, ILMN_1750079, ILMN_1775637, ILMN_1685318, ILMN_1750075, ILMN_1791949, ILMN_1745365, ILMN_1684591, ILMN_1716921, ILMN_1815941, ILMN_1681703, ILMN_1673207, ILMN_1762085, ILMN_17…	872	975	12983	1.42016	0.31259	0.0206083	0.682045
Annotation Cluster 4	Enrichment Score: 14.147538123530195
Category	Term	Count	%	PValue	Genes	List Total	Pop Hits	Pop Total	Fold Enrichment	Bonferroni	Benjamini	FDR
GOTERM_CC_FAT	GO:0005730~nucleolus	101	8.36785	3.58622e-19	ILMN_1782257, ILMN_1697286, ILMN_1799796, ILMN_1697919, ILMN_1754643, ILMN_1673023, ILMN_1676010, ILMN_1796710, ILMN_1738681, ILMN_1736080, ILMN_1688971, ILMN_1758823, ILMN_1805344, ILMN_1756787, ILMN_1741976, ILMN_1797341, ILMN_1682095, ILMN_1768273, ILMN_1809890, ILMN_1802611, ILMN_1798533, ILMN_1801869, ILMN_1731358, ILMN_1775637, ILMN_1725121, ILMN_1676737, ILMN_1708764, ILMN_1762085, ILMN_17…	712	698	12782	2.59767	1.68194e-16	2.80323e-17	5.11781e-16
GOTERM_CC_FAT	GO:0043232~intracellular non-membrane-bounded organelle	223	18.4756	1.00317e-12	ILMN_1782257, ILMN_1697919, ILMN_1685631, ILMN_1808789, ILMN_1653444, ILMN_1796710, ILMN_1728556, ILMN_1698441, ILMN_1750256, ILMN_1758823, ILMN_1667408, ILMN_1717165, ILMN_1813846, ILMN_1809890, ILMN_1798533, ILMN_1731358, ILMN_1732885, ILMN_1750079, ILMN_1742400, ILMN_1708764, ILMN_1667306, ILMN_1780937, ILMN_1725973, ILMN_1781155, ILMN_1710873, ILMN_1677532, ILMN_1679797, ILMN_1798354, ILMN_17…	712	2596	12782	1.54212	4.705e-10	5.88124e-11	1.43164e-09
GOTERM_CC_FAT	GO:0043228~non-membrane-bounded organelle	223	18.4756	1.00317e-12	ILMN_1782257, ILMN_1697919, ILMN_1685631, ILMN_1808789, ILMN_1653444, ILMN_1796710, ILMN_1728556, ILMN_1698441, ILMN_1750256, ILMN_1758823, ILMN_1667408, ILMN_1717165, ILMN_1813846, ILMN_1809890, ILMN_1798533, ILMN_1731358, ILMN_1732885, ILMN_1750079, ILMN_1742400, ILMN_1708764, ILMN_1667306, ILMN_1780937, ILMN_1725973, ILMN_1781155, ILMN_1710873, ILMN_1677532, ILMN_1679797, ILMN_1798354, ILMN_17…	712	2596	12782	1.54212	4.705e-10	5.88124e-11	1.43164e-09
Annotation Cluster 5	Enrichment Score: 10.639054348673538
Category	Term	Count	%	PValue	Genes	List Total	Pop Hits	Pop Total	Fold Enrichment	Bonferroni	Benjamini	FDR
SP_PIR_KEYWORDS	mrna processing	55	4.55675	2.93567e-15	ILMN_1686626, ILMN_1697286, ILMN_1715392, ILMN_1697670, ILMN_1799299, ILMN_1743104, ILMN_1781906, ILMN_1754643, ILMN_1717154, ILMN_1747303, ILMN_1754304, ILMN_1692575, ILMN_1705928, ILMN_1745385, ILMN_1805344, ILMN_1813603, ILMN_1799103, ILMN_1760256, ILMN_1696407, ILMN_1764460, ILMN_1798602, ILMN_1802157, ILMN_1695000, ILMN_1697469, ILMN_1690206, ILMN_1803110, ILMN_1787689, ILMN_1768930, ILMN_17…	1200	260	19235	3.39079	1.35092e-12	1.22791e-13	4.11893e-12
SP_PIR_KEYWORDS	mrna splicing	48	3.9768	8.15487e-15	ILMN_1787689, ILMN_1768930, ILMN_1686626, ILMN_1697286, ILMN_1697670, ILMN_1715392, ILMN_1799299, ILMN_1718571, ILMN_1725889, ILMN_1743104, ILMN_1781906, ILMN_1813635, ILMN_1717154, ILMN_1754643, ILMN_1747303, ILMN_1716922, ILMN_1740976, ILMN_1754304, ILMN_1692575, ILMN_1745385, ILMN_1705928, ILMN_1770206, ILMN_1659523, ILMN_1735679, ILMN_1786893, ILMN_1727001, ILMN_1805344, ILMN_1656274, ILMN_16…	1200	209	19235	3.68134	3.79297e-12	3.1608e-13	1.15574e-11
GOTERM_BP_FAT	GO:0016071~mRNA metabolic process	68	5.6338	1.43289e-14	ILMN_1686626, ILMN_1697286, ILMN_1697670, ILMN_1715392, ILMN_1705515, ILMN_1799299, ILMN_1681304, ILMN_1743104, ILMN_1809285, ILMN_1781906, ILMN_1754643, ILMN_1717154, ILMN_1747303, ILMN_1671326, ILMN_1754304, ILMN_1773968, ILMN_1692575, ILMN_1705928, ILMN_1745385, ILMN_1805344, ILMN_1813603, ILMN_1799103, ILMN_1764460, ILMN_1760256, ILMN_1696407, ILMN_1798602, ILMN_1802157, ILMN_1711189, ILMN_16…	886	370	13528	2.80613	3.8798e-11	1.29327e-11	2.54907e-11
GOTERM_BP_FAT	GO:0006396~RNA processing	85	7.04225	1.09012e-13	ILMN_1686626, ILMN_1697286, ILMN_1799796, ILMN_1697670, ILMN_1715392, ILMN_1799299, ILMN_1743104, ILMN_1781906, ILMN_1754643, ILMN_1717154, ILMN_1738239, ILMN_1747303, ILMN_1803590, ILMN_1655137, ILMN_1657164, ILMN_1754304, ILMN_1812973, ILMN_1692575, ILMN_1705928, ILMN_1745385, ILMN_1805344, ILMN_1813603, ILMN_1799103, ILMN_1764460, ILMN_1696407, ILMN_1760256, ILMN_1798602, ILMN_1660844, ILMN_16…	886	547	13528	2.37264	2.95346e-10	7.38364e-11	1.94089e-10
GOTERM_BP_FAT	GO:0008380~RNA splicing	56	4.6396	2.10054e-13	ILMN_1686626, ILMN_1697286, ILMN_1715392, ILMN_1697670, ILMN_1799299, ILMN_1743104, ILMN_1781906, ILMN_1754643, ILMN_1717154, ILMN_1747303, ILMN_1754304, ILMN_1692575, ILMN_1705928, ILMN_1745385, ILMN_1805344, ILMN_1813603, ILMN_1799103, ILMN_1760256, ILMN_1696407, ILMN_1764460, ILMN_1798602, ILMN_1802157, ILMN_1695000, ILMN_1697469, ILMN_1690206, ILMN_1803110, ILMN_1798163, ILMN_1787689, ILMN_17…	886	284	13528	3.01071	5.69037e-10	9.48395e-11	3.73945e-10
GOTERM_BP_FAT	GO:0006397~mRNA processing	60	4.971	2.94373e-13	ILMN_1686626, ILMN_1697286, ILMN_1715392, ILMN_1697670, ILMN_1799299, ILMN_1743104, ILMN_1781906, ILMN_1754643, ILMN_1717154, ILMN_1747303, ILMN_1754304, ILMN_1692575, ILMN_1705928, ILMN_1745385, ILMN_1805344, ILMN_1813603, ILMN_1799103, ILMN_1760256, ILMN_1696407, ILMN_1764460, ILMN_1798602, ILMN_1802157, ILMN_1695000, ILMN_1697469, ILMN_1690206, ILMN_1803110, ILMN_1788363, ILMN_1798163, ILMN_17…	886	321	13528	2.85395	7.97313e-10	1.13902e-10	5.23948e-10
GOTERM_CC_FAT	GO:0005681~spliceosome	32	2.6512	4.58724e-12	ILMN_1768930, ILMN_1686626, ILMN_1697286, ILMN_1715392, ILMN_1697670, ILMN_1799299, ILMN_1718571, ILMN_1781906, ILMN_1754643, ILMN_1717154, ILMN_1754304, ILMN_1815051, ILMN_1745385, ILMN_1770206, ILMN_1705928, ILMN_1735679, ILMN_1786893, ILMN_1805344, ILMN_1656274, ILMN_1813603, ILMN_1799103, ILMN_1764460, ILMN_1760256, ILMN_1712560, ILMN_1732053, ILMN_1695000, ILMN_1807737, ILMN_1690206, ILMN_16…	712	132	12782	4.35206	2.15141e-09	2.39045e-10	6.54632e-09
KEGG_PATHWAY	hsa03040:Spliceosome	31	2.56835	2.65104e-11	ILMN_1768930, ILMN_1686626, ILMN_1697286, ILMN_1715392, ILMN_1799299, ILMN_1699636, ILMN_1718571, ILMN_1781906, ILMN_1717154, ILMN_1716922, ILMN_1695983, ILMN_1745385, ILMN_1705928, ILMN_1659523, ILMN_1735679, ILMN_1727001, ILMN_1805344, ILMN_1656274, ILMN_1813603, ILMN_1799103, ILMN_1696407, ILMN_1760256, ILMN_1731043, ILMN_1732053, ILMN_1802157, ILMN_1697469, ILMN_1690206, ILMN_1697440, ILMN_17…	306	126	5085	4.08847	4.21515e-09	4.21515e-09	3.19766e-08
PUBMED_ID	12226669	24	1.9884	3.01091e-11	ILMN_1653129, ILMN_1813603, ILMN_1768930, ILMN_1697286, ILMN_1697670, ILMN_1798354, ILMN_1689445, ILMN_1696407, ILMN_1718571, ILMN_1732053, ILMN_1798602, ILMN_1751368, ILMN_1697469, ILMN_1690206, ILMN_1804610, ILMN_1697440, ILMN_1745385, ILMN_1803110, ILMN_1705928, ILMN_1706839, ILMN_1795341, ILMN_1798163, ILMN_1735679, ILMN_1786893	1207	98	27491	5.57787	5.68189e-07	2.58268e-08	6.53056e-08
SP_PIR_KEYWORDS	Spliceosome	30	2.4855	1.82161e-10	ILMN_1768930, ILMN_1686626, ILMN_1697286, ILMN_1715392, ILMN_1697670, ILMN_1799299, ILMN_1718571, ILMN_1781906, ILMN_1754643, ILMN_1717154, ILMN_1754304, ILMN_1770206, ILMN_1705928, ILMN_1745385, ILMN_1735679, ILMN_1786893, ILMN_1805344, ILMN_1656274, ILMN_1813603, ILMN_1799103, ILMN_1764460, ILMN_1760256, ILMN_1712560, ILMN_1695000, ILMN_1807737, ILMN_1690206, ILMN_1697440, ILMN_1760281, ILMN_18…	1200	120	19235	4.00729	8.52513e-08	5.3282e-09	2.59879e-07
GOTERM_BP_FAT	GO:0000398~nuclear mRNA splicing, via spliceosome	32	2.6512	1.29817e-08	ILMN_1768930, ILMN_1686626, ILMN_1697286, ILMN_1715392, ILMN_1697670, ILMN_1689445, ILMN_1718571, ILMN_1751368, ILMN_1747303, ILMN_1692575, ILMN_1745385, ILMN_1770206, ILMN_1705928, ILMN_1659523, ILMN_1735679, ILMN_1786893, ILMN_1653129, ILMN_1813603, ILMN_1799103, ILMN_1798354, ILMN_1696407, ILMN_1712560, ILMN_1731043, ILMN_1732053, ILMN_1798602, ILMN_1707506, ILMN_1697469, ILMN_1690206, ILMN_16…	886	153	13528	3.19344	3.51669e-05	2.93062e-06	2.31102e-05
GOTERM_BP_FAT	GO:0000377~RNA splicing, via transesterification reactions with bulged adenosine as nucleophile	32	2.6512	1.29817e-08	ILMN_1768930, ILMN_1686626, ILMN_1697286, ILMN_1715392, ILMN_1697670, ILMN_1689445, ILMN_1718571, ILMN_1751368, ILMN_1747303, ILMN_1692575, ILMN_1745385, ILMN_1770206, ILMN_1705928, ILMN_1659523, ILMN_1735679, ILMN_1786893, ILMN_1653129, ILMN_1813603, ILMN_1799103, ILMN_1798354, ILMN_1696407, ILMN_1712560, ILMN_1731043, ILMN_1732053, ILMN_1798602, ILMN_1707506, ILMN_1697469, ILMN_1690206, ILMN_16…	886	153	13528	3.19344	3.51669e-05	2.93062e-06	2.31102e-05
GOTERM_BP_FAT	GO:0000375~RNA splicing, via transesterification reactions	32	2.6512	1.29817e-08	ILMN_1768930, ILMN_1686626, ILMN_1697286, ILMN_1715392, ILMN_1697670, ILMN_1689445, ILMN_1718571, ILMN_1751368, ILMN_1747303, ILMN_1692575, ILMN_1745385, ILMN_1770206, ILMN_1705928, ILMN_1659523, ILMN_1735679, ILMN_1786893, ILMN_1653129, ILMN_1813603, ILMN_1799103, ILMN_1798354, ILMN_1696407, ILMN_1712560, ILMN_1731043, ILMN_1732053, ILMN_1798602, ILMN_1707506, ILMN_1697469, ILMN_1690206, ILMN_16…	886	153	13528	3.19344	3.51669e-05	2.93062e-06	2.31102e-05
PUBMED_ID	11991638	18	1.4913	1.5867e-08	ILMN_1805344, ILMN_1813603, ILMN_1697286, ILMN_1697670, ILMN_1799103, ILMN_1764460, ILMN_1760256, ILMN_1718571, ILMN_1717154, ILMN_1754643, ILMN_1695000, ILMN_1690206, ILMN_1760281, ILMN_1745385, ILMN_1803110, ILMN_1705928, ILMN_1795341, ILMN_1735679	1207	74	27491	5.54018	0.000299381	1.0325e-05	3.44149e-05
GOTERM_CC_FAT	GO:0030529~ribonucleoprotein complex	55	4.55675	4.84766e-06	ILMN_1762747, ILMN_1782257, ILMN_1686626, ILMN_1697286, ILMN_1715392, ILMN_1697670, ILMN_1799299, ILMN_1760542, ILMN_1800796, ILMN_1809285, ILMN_1781906, ILMN_1717154, ILMN_1754643, ILMN_1653444, ILMN_1760441, ILMN_1671326, ILMN_1754304, ILMN_1812973, ILMN_1680782, ILMN_1761175, ILMN_1738681, ILMN_1745385, ILMN_1705928, ILMN_1805344, ILMN_1813603, ILMN_1799103, ILMN_1760256, ILMN_1764460, ILMN_16…	712	515	12782	1.91723	0.00227097	0.000151559	0.00691776
Annotation Cluster 6	Enrichment Score: 7.6684144197766075
Category	Term	Count	%	PValue	Genes	List Total	Pop Hits	Pop Total	Fold Enrichment	Bonferroni	Benjamini	FDR
GOTERM_CC_FAT	GO:0005694~chromosome	64	5.3024	2.15802e-11	ILMN_1814173, ILMN_1737314, ILMN_1778930, ILMN_1685631, ILMN_1669635, ILMN_1716480, ILMN_1681503, ILMN_1688638, ILMN_1815924, ILMN_1728556, ILMN_1698441, ILMN_1724489, ILMN_1736080, ILMN_1758823, ILMN_1692026, ILMN_1746171, ILMN_1784860, ILMN_1815475, ILMN_1684038, ILMN_1666399, ILMN_1810474, ILMN_1751338, ILMN_1804679, ILMN_1741572, ILMN_1695357, ILMN_1693145, ILMN_1682091, ILMN_1718807, ILMN_17…	712	460	12782	2.4977	1.01211e-08	1.01211e-09	3.07966e-08
GOTERM_CC_FAT	GO:0044427~chromosomal part	56	4.6396	9.43868e-11	ILMN_1814173, ILMN_1737314, ILMN_1778930, ILMN_1685631, ILMN_1669635, ILMN_1716480, ILMN_1681503, ILMN_1688638, ILMN_1815924, ILMN_1728556, ILMN_1698441, ILMN_1724489, ILMN_1692026, ILMN_1746171, ILMN_1784860, ILMN_1815475, ILMN_1684038, ILMN_1666399, ILMN_1810474, ILMN_1751338, ILMN_1804679, ILMN_1695357, ILMN_1693145, ILMN_1682091, ILMN_1718807, ILMN_1705570, ILMN_1735093, ILMN_1748527, ILMN_16…	712	386	12782	2.60447	4.42674e-08	4.02431e-09	1.34697e-07
GOTERM_CC_FAT	GO:0044454~nuclear chromosome part	22	1.8227	3.33167e-06	ILMN_1747419, ILMN_1750079, ILMN_1692026, ILMN_1746171, ILMN_1695706, ILMN_1666399, ILMN_1810474, ILMN_1797813, ILMN_1716480, ILMN_1681503, ILMN_1718807, ILMN_1735093, ILMN_1705570, ILMN_1748527, ILMN_1751886, ILMN_1694502, ILMN_1812208, ILMN_1683441, ILMN_1788363, ILMN_1806818, ILMN_1676625, ILMN_1656082, ILMN_1732885	712	122	12782	3.23729	0.00156134	0.000111605	0.00475445
GOTERM_CC_FAT	GO:0000228~nuclear chromosome	24	1.9884	3.12401e-05	ILMN_1750079, ILMN_1797813, ILMN_1716480, ILMN_1681503, ILMN_1751886, ILMN_1656082, ILMN_1747419, ILMN_1758823, ILMN_1692026, ILMN_1746171, ILMN_1695706, ILMN_1810474, ILMN_1666399, ILMN_1718807, ILMN_1792666, ILMN_1705570, ILMN_1735093, ILMN_1748527, ILMN_1694502, ILMN_1812208, ILMN_1683441, ILMN_1676625, ILMN_1806818, ILMN_1788363, ILMN_1732885	712	162	12782	2.65959	0.014545	0.000813661	0.0445729
Annotation Cluster 7	Enrichment Score: 6.708552280063484
Category	Term	Count	%	PValue	Genes	List Total	Pop Hits	Pop Total	Fold Enrichment	Bonferroni	Benjamini	FDR
UP_SEQ_FEATURE	domain:Helicase C-terminal	30	2.4855	5.98452e-12	ILMN_1814173, ILMN_1665414, ILMN_1686626, ILMN_1654583, ILMN_1814859, ILMN_1730059, ILMN_1778930, ILMN_1740216, ILMN_1673023, ILMN_1748077, ILMN_1747303, ILMN_1695983, ILMN_1716922, ILMN_1722423, ILMN_1799387, ILMN_1732226, ILMN_1797425, ILMN_1712320, ILMN_1781721, ILMN_1735679, ILMN_1727001, ILMN_1805344, ILMN_1673820, ILMN_1786016, ILMN_1741976, ILMN_1756220, ILMN_1796572, ILMN_1720440, ILMN_16…	1199	105	19113	4.55451	1.79357e-08	1.28112e-09	1.0775e-08
INTERPRO	IPR014001:DEAD-like helicase, N-terminal	31	2.56835	6.46437e-12	ILMN_1814173, ILMN_1665414, ILMN_1686626, ILMN_1654583, ILMN_1814859, ILMN_1730059, ILMN_1778930, ILMN_1740216, ILMN_1673023, ILMN_1748077, ILMN_1747303, ILMN_1695983, ILMN_1716922, ILMN_1722423, ILMN_1799387, ILMN_1732226, ILMN_1797425, ILMN_1712320, ILMN_1705928, ILMN_1781721, ILMN_1735679, ILMN_1727001, ILMN_1805344, ILMN_1673820, ILMN_1786016, ILMN_1741976, ILMN_1756220, ILMN_1796572, ILMN_17…	1081	109	16659	4.38287	9.16003e-09	2.29001e-09	1.06668e-08
INTERPRO	IPR014021:Helicase, superfamily 1 and 2, ATP-binding	30	2.4855	2.19783e-11	ILMN_1814173, ILMN_1665414, ILMN_1686626, ILMN_1654583, ILMN_1814859, ILMN_1730059, ILMN_1778930, ILMN_1740216, ILMN_1673023, ILMN_1748077, ILMN_1747303, ILMN_1695983, ILMN_1716922, ILMN_1799387, ILMN_1732226, ILMN_1797425, ILMN_1712320, ILMN_1705928, ILMN_1781721, ILMN_1735679, ILMN_1727001, ILMN_1805344, ILMN_1673820, ILMN_1786016, ILMN_1741976, ILMN_1756220, ILMN_1796572, ILMN_1720440, ILMN_16…	1081	107	16659	4.32077	3.11433e-08	6.22865e-09	3.62663e-08
INTERPRO	IPR001650:DNA/RNA helicase, C-terminal	30	2.4855	2.19783e-11	ILMN_1814173, ILMN_1665414, ILMN_1686626, ILMN_1814859, ILMN_1730059, ILMN_1778930, ILMN_1740216, ILMN_1673023, ILMN_1748077, ILMN_1747303, ILMN_1695983, ILMN_1722423, ILMN_1716922, ILMN_1799387, ILMN_1732226, ILMN_1797425, ILMN_1712320, ILMN_1705928, ILMN_1781721, ILMN_1735679, ILMN_1727001, ILMN_1805344, ILMN_1673820, ILMN_1786016, ILMN_1741976, ILMN_1756220, ILMN_1796572, ILMN_1720440, ILMN_16…	1081	107	16659	4.32077	3.11433e-08	6.22865e-09	3.62663e-08
UP_SEQ_FEATURE	domain:Helicase ATP-binding	29	2.40265	1.14821e-10	ILMN_1814173, ILMN_1665414, ILMN_1686626, ILMN_1654583, ILMN_1814859, ILMN_1730059, ILMN_1778930, ILMN_1740216, ILMN_1673023, ILMN_1748077, ILMN_1747303, ILMN_1716922, ILMN_1695983, ILMN_1799387, ILMN_1732226, ILMN_1797425, ILMN_1712320, ILMN_1781721, ILMN_1735679, ILMN_1727001, ILMN_1805344, ILMN_1673820, ILMN_1786016, ILMN_1741976, ILMN_1756220, ILMN_1796572, ILMN_1720440, ILMN_1697503, ILMN_16…	1199	110	19113	4.20257	3.44118e-07	2.15074e-08	2.06732e-07
SMART	SM00487:DEXDc	31	2.56835	3.27328e-10	ILMN_1814173, ILMN_1665414, ILMN_1686626, ILMN_1654583, ILMN_1814859, ILMN_1730059, ILMN_1778930, ILMN_1740216, ILMN_1673023, ILMN_1748077, ILMN_1747303, ILMN_1695983, ILMN_1716922, ILMN_1722423, ILMN_1799387, ILMN_1732226, ILMN_1797425, ILMN_1712320, ILMN_1705928, ILMN_1781721, ILMN_1735679, ILMN_1727001, ILMN_1805344, ILMN_1673820, ILMN_1786016, ILMN_1741976, ILMN_1756220, ILMN_1796572, ILMN_17…	696	109	9079	3.70992	9.72165e-08	4.86082e-08	4.36739e-07
SP_PIR_KEYWORDS	helicase	31	2.56835	6.56522e-10	ILMN_1814173, ILMN_1665414, ILMN_1686626, ILMN_1654583, ILMN_1814859, ILMN_1730059, ILMN_1778930, ILMN_1740216, ILMN_1673023, ILMN_1748077, ILMN_1747303, ILMN_1695983, ILMN_1716922, ILMN_1722423, ILMN_1799387, ILMN_1732226, ILMN_1797425, ILMN_1712320, ILMN_1705928, ILMN_1781721, ILMN_1735679, ILMN_1727001, ILMN_1805344, ILMN_1673820, ILMN_1786016, ILMN_1741976, ILMN_1756220, ILMN_1796572, ILMN_17…	1200	134	19235	3.70824	3.07252e-07	1.80737e-08	9.36624e-07
SMART	SM00490:HELICc	29	2.40265	3.54715e-09	ILMN_1814173, ILMN_1665414, ILMN_1686626, ILMN_1814859, ILMN_1730059, ILMN_1778930, ILMN_1740216, ILMN_1748077, ILMN_1747303, ILMN_1722423, ILMN_1716922, ILMN_1695983, ILMN_1799387, ILMN_1732226, ILMN_1797425, ILMN_1712320, ILMN_1705928, ILMN_1781721, ILMN_1735679, ILMN_1727001, ILMN_1805344, ILMN_1673820, ILMN_1786016, ILMN_1741976, ILMN_1756220, ILMN_1796572, ILMN_1720440, ILMN_1697503, ILMN_16…	696	106	9079	3.56879	1.0535e-06	3.51168e-07	4.7328e-06
GOTERM_MF_FAT	GO:0004386~helicase activity	31	2.56835	1.00057e-08	ILMN_1814173, ILMN_1665414, ILMN_1686626, ILMN_1654583, ILMN_1814859, ILMN_1730059, ILMN_1778930, ILMN_1740216, ILMN_1673023, ILMN_1748077, ILMN_1747303, ILMN_1695983, ILMN_1716922, ILMN_1722423, ILMN_1799387, ILMN_1732226, ILMN_1797425, ILMN_1712320, ILMN_1705928, ILMN_1781721, ILMN_1735679, ILMN_1727001, ILMN_1805344, ILMN_1673820, ILMN_1786016, ILMN_1741976, ILMN_1756220, ILMN_1796572, ILMN_17…	872	140	12983	3.2968	8.47476e-06	1.69496e-06	1.54739e-05
GOTERM_MF_FAT	GO:0070035~purine NTP-dependent helicase activity	24	1.9884	9.05246e-08	ILMN_1665414, ILMN_1686626, ILMN_1654583, ILMN_1814859, ILMN_1730059, ILMN_1740216, ILMN_1748077, ILMN_1747303, ILMN_1695983, ILMN_1716922, ILMN_1712320, ILMN_1797425, ILMN_1732226, ILMN_1705928, ILMN_1735679, ILMN_1781721, ILMN_1727001, ILMN_1805344, ILMN_1786016, ILMN_1756220, ILMN_1796572, ILMN_1720440, ILMN_1697503, ILMN_1653047, ILMN_1764285	872	98	12983	3.64623	7.66714e-05	8.51933e-06	0.000139997
GOTERM_MF_FAT	GO:0008026~ATP-dependent helicase activity	24	1.9884	9.05246e-08	ILMN_1665414, ILMN_1686626, ILMN_1654583, ILMN_1814859, ILMN_1730059, ILMN_1740216, ILMN_1748077, ILMN_1747303, ILMN_1695983, ILMN_1716922, ILMN_1712320, ILMN_1797425, ILMN_1732226, ILMN_1705928, ILMN_1735679, ILMN_1781721, ILMN_1727001, ILMN_1805344, ILMN_1786016, ILMN_1756220, ILMN_1796572, ILMN_1720440, ILMN_1697503, ILMN_1653047, ILMN_1764285	872	98	12983	3.64623	7.66714e-05	8.51933e-06	0.000139997
INTERPRO	IPR011545:DNA/RNA helicase, DEAD/DEAH box type, N-terminal	17	1.40845	1.10287e-06	ILMN_1727001, ILMN_1805344, ILMN_1686626, ILMN_1665414, ILMN_1814859, ILMN_1748077, ILMN_1747303, ILMN_1695983, ILMN_1756220, ILMN_1796572, ILMN_1732226, ILMN_1720440, ILMN_1712320, ILMN_1797425, ILMN_1697503, ILMN_1705928, ILMN_1781721, ILMN_1764285	1081	61	16659	4.29479	0.00156155	0.000130222	0.00181983
UP_SEQ_FEATURE	short sequence motif:Q motif	12	0.9942	1.05395e-05	ILMN_1727001, ILMN_1805344, ILMN_1686626, ILMN_1665414, ILMN_1814859, ILMN_1748077, ILMN_1747303, ILMN_1695983, ILMN_1756220, ILMN_1712320, ILMN_1797425, ILMN_1781721, ILMN_1764285	1199	37	19113	5.16998	0.0310935	0.00157811	0.0189744
INTERPRO	IPR014014:RNA helicase, DEAD-box type, Q motif	12	0.9942	1.44337e-05	ILMN_1727001, ILMN_1805344, ILMN_1686626, ILMN_1665414, ILMN_1814859, ILMN_1748077, ILMN_1747303, ILMN_1695983, ILMN_1756220, ILMN_1712320, ILMN_1797425, ILMN_1781721, ILMN_1764285	1081	37	16659	4.99807	0.0202449	0.00157205	0.0238143
GOTERM_MF_FAT	GO:0016887~ATPase activity	41	3.39685	0.000249953	ILMN_1814173, ILMN_1665414, ILMN_1686626, ILMN_1659364, ILMN_1654583, ILMN_1651964, ILMN_1699636, ILMN_1814859, ILMN_1730059, ILMN_1740216, ILMN_1654541, ILMN_1748077, ILMN_1747303, ILMN_1695983, ILMN_1716922, ILMN_1799387, ILMN_1784176, ILMN_1782057, ILMN_1732226, ILMN_1797425, ILMN_1712320, ILMN_1724489, ILMN_1705928, ILMN_1735679, ILMN_1781721, ILMN_1727001, ILMN_1805344, ILMN_1673820, ILMN_17…	872	334	12983	1.82766	0.190822	0.0161555	0.385858
GOTERM_MF_FAT	GO:0042623~ATPase activity, coupled	35	2.89975	0.000327056	ILMN_1814173, ILMN_1665414, ILMN_1686626, ILMN_1659364, ILMN_1654583, ILMN_1651964, ILMN_1814859, ILMN_1730059, ILMN_1740216, ILMN_1654541, ILMN_1748077, ILMN_1747303, ILMN_1695983, ILMN_1716922, ILMN_1782057, ILMN_1732226, ILMN_1797425, ILMN_1712320, ILMN_1724489, ILMN_1705928, ILMN_1781721, ILMN_1735679, ILMN_1727001, ILMN_1805344, ILMN_1722056, ILMN_1784860, ILMN_1717701, ILMN_1786016, ILMN_16…	872	272	12983	1.91583	0.241993	0.0183013	0.504603
UP_SEQ_FEATURE	short sequence motif:DEAD box	9	0.74565	0.000789329	ILMN_1695983, ILMN_1727001, ILMN_1805344, ILMN_1665414, ILMN_1814859, ILMN_1756220, ILMN_1797425, ILMN_1781721, ILMN_1764285, ILMN_1748077	1199	33	19113	4.34749	0.906196	0.0588764	1.41167
INTERPRO	IPR000629:RNA helicase, ATP-dependent, DEAD-box, conserved site	8	0.6628	0.00379405	ILMN_1695983, ILMN_1727001, ILMN_1805344, ILMN_1814859, ILMN_1756220, ILMN_1797425, ILMN_1781721, ILMN_1764285	1081	32	16659	3.85268	0.995422	0.187118	6.07978
GOTERM_MF_FAT	GO:0003724~RNA helicase activity	7	0.57995	0.0112355	ILMN_1716922, ILMN_1805344, ILMN_1686626, ILMN_1814859, ILMN_1756220, ILMN_1735679, ILMN_1764285	872	29	12983	3.59384	0.99993	0.265613	16.0326
PIR_SUPERFAMILY	PIRSF001321:ATP-dependent RNA helicase	3	0.24855	0.108979	ILMN_1695983, ILMN_1805344, ILMN_1764285	386	11	7396	5.22562	1	1	80.249
Annotation Cluster 8	Enrichment Score: 5.807172950744398
Category	Term	Count	%	PValue	Genes	List Total	Pop Hits	Pop Total	Fold Enrichment	Bonferroni	Benjamini	FDR
SP_PIR_KEYWORDS	rna-binding	83	6.87655	4.54634e-14	ILMN_1794260, ILMN_1686626, ILMN_1665414, ILMN_1799796, ILMN_1697670, ILMN_1705515, ILMN_1750800, ILMN_1743104, ILMN_1800796, ILMN_1781906, ILMN_1717154, ILMN_1653444, ILMN_1738239, ILMN_1748077, ILMN_1671326, ILMN_1773968, ILMN_1692575, ILMN_1797425, ILMN_1712320, ILMN_1745385, ILMN_1765091, ILMN_1722345, ILMN_1805344, ILMN_1799103, ILMN_1764460, ILMN_1696407, ILMN_1722059, ILMN_1760256, ILMN_16…	1200	540	19235	2.46374	2.1251e-11	1.63469e-12	6.47815e-11
GOTERM_MF_FAT	GO:0003723~RNA binding	93	7.70505	8.38312e-10	ILMN_1794260, ILMN_1762747, ILMN_1665414, ILMN_1686626, ILMN_1697286, ILMN_1799796, ILMN_1697670, ILMN_1705515, ILMN_1750800, ILMN_1760542, ILMN_1743104, ILMN_1800796, ILMN_1746577, ILMN_1781906, ILMN_1717154, ILMN_1653444, ILMN_1748077, ILMN_1738239, ILMN_1671326, ILMN_1760441, ILMN_1773968, ILMN_1692575, ILMN_1797425, ILMN_1712320, ILMN_1745385, ILMN_1765091, ILMN_1722345, ILMN_1805344, ILMN_17…	872	718	12983	1.92849	7.1005e-07	1.77513e-07	1.29646e-06
INTERPRO	IPR012677:Nucleotide-binding, alpha-beta plait	37	3.06545	1.06267e-07	ILMN_1787689, ILMN_1768930, ILMN_1705515, ILMN_1699636, ILMN_1743104, ILMN_1781906, ILMN_1751368, ILMN_1738239, ILMN_1740976, ILMN_1804737, ILMN_1745385, ILMN_1691776, ILMN_1786893, ILMN_1677532, ILMN_1725719, ILMN_1653129, ILMN_1678618, ILMN_1727041, ILMN_1705783, ILMN_1722059, ILMN_1696407, ILMN_1760256, ILMN_1697735, ILMN_1731043, ILMN_1732053, ILMN_1780756, ILMN_1746257, ILMN_1688000, ILMN_16…	1081	213	16659	2.67698	0.00015057	1.88224e-05	0.000175351
INTERPRO	IPR000504:RNA recognition motif, RNP-1	35	2.89975	7.54078e-07	ILMN_1787689, ILMN_1768930, ILMN_1699636, ILMN_1743104, ILMN_1781906, ILMN_1751368, ILMN_1738239, ILMN_1740976, ILMN_1804737, ILMN_1745385, ILMN_1691776, ILMN_1786893, ILMN_1747968, ILMN_1677532, ILMN_1725719, ILMN_1653129, ILMN_1678618, ILMN_1727041, ILMN_1722059, ILMN_1696407, ILMN_1760256, ILMN_1697735, ILMN_1731043, ILMN_1732053, ILMN_1780756, ILMN_1746257, ILMN_1688000, ILMN_1655497, ILMN_17…	1081	211	16659	2.55628	0.00106796	0.000106847	0.00124429
SMART	SM00360:RRM	35	2.89975	2.43508e-05	ILMN_1787689, ILMN_1768930, ILMN_1699636, ILMN_1743104, ILMN_1781906, ILMN_1751368, ILMN_1738239, ILMN_1740976, ILMN_1804737, ILMN_1745385, ILMN_1691776, ILMN_1786893, ILMN_1747968, ILMN_1677532, ILMN_1725719, ILMN_1653129, ILMN_1678618, ILMN_1727041, ILMN_1722059, ILMN_1696407, ILMN_1760256, ILMN_1697735, ILMN_1731043, ILMN_1732053, ILMN_1780756, ILMN_1746257, ILMN_1688000, ILMN_1655497, ILMN_17…	696	211	9079	2.16379	0.00720619	0.00120465	0.0324853
UP_SEQ_FEATURE	domain:RRM 2	19	1.57415	5.10023e-05	ILMN_1725719, ILMN_1677532, ILMN_1678618, ILMN_1768930, ILMN_1743104, ILMN_1751368, ILMN_1780756, ILMN_1746257, ILMN_1740976, ILMN_1734286, ILMN_1697469, ILMN_1651262, ILMN_1802611, ILMN_1804737, ILMN_1745385, ILMN_1732722, ILMN_1795341, ILMN_1691776, ILMN_1786893	1199	101	19113	2.99876	0.141748	0.0056454	0.0917884
UP_SEQ_FEATURE	domain:RRM 1	19	1.57415	5.10023e-05	ILMN_1725719, ILMN_1677532, ILMN_1678618, ILMN_1768930, ILMN_1743104, ILMN_1751368, ILMN_1780756, ILMN_1746257, ILMN_1740976, ILMN_1734286, ILMN_1697469, ILMN_1651262, ILMN_1802611, ILMN_1804737, ILMN_1745385, ILMN_1732722, ILMN_1795341, ILMN_1691776, ILMN_1786893	1199	101	19113	2.99876	0.141748	0.0056454	0.0917884
UP_SEQ_FEATURE	domain:RRM	17	1.40845	0.00308694	ILMN_1787689, ILMN_1653129, ILMN_1727041, ILMN_1705783, ILMN_1696407, ILMN_1760256, ILMN_1722059, ILMN_1697735, ILMN_1731043, ILMN_1781906, ILMN_1732053, ILMN_1738239, ILMN_1688000, ILMN_1655497, ILMN_1807737, ILMN_1742224, ILMN_1689747, ILMN_1747968	1199	119	19113	2.27725	0.999905	0.169159	5.41444
UP_SEQ_FEATURE	domain:RRM 3	7	0.57995	0.0910624	ILMN_1734286, ILMN_1725719, ILMN_1768930, ILMN_1678618, ILMN_1802611, ILMN_1804737, ILMN_1745385	1199	50	19113	2.23171	1	0.942817	82.0767
Annotation Cluster 9	Enrichment Score: 4.5699388566665275
Category	Term	Count	%	PValue	Genes	List Total	Pop Hits	Pop Total	Fold Enrichment	Bonferroni	Benjamini	FDR
GOTERM_BP_FAT	GO:0006259~DNA metabolic process	68	5.6338	2.13942e-08	ILMN_1783753, ILMN_1771593, ILMN_1754272, ILMN_1745852, ILMN_1758049, ILMN_1786433, ILMN_1740216, ILMN_1760201, ILMN_1785198, ILMN_1716480, ILMN_1681503, ILMN_1778734, ILMN_1812622, ILMN_1688638, ILMN_1724489, ILMN_1756793, ILMN_1678962, ILMN_1758823, ILMN_1756787, ILMN_1767894, ILMN_1714438, ILMN_1784860, ILMN_1691188, ILMN_1699049, ILMN_1784766, ILMN_1763705, ILMN_1672357, ILMN_1718807, ILMN_17…	886	506	13528	2.05191	5.79553e-05	4.45822e-06	3.80862e-05
GOTERM_BP_FAT	GO:0006974~response to DNA damage stimulus	49	4.05965	4.93524e-06	ILMN_1783753, ILMN_1745852, ILMN_1737314, ILMN_1786433, ILMN_1740216, ILMN_1716480, ILMN_1778734, ILMN_1812622, ILMN_1802620, ILMN_1724489, ILMN_1756793, ILMN_1767894, ILMN_1756787, ILMN_1714438, ILMN_1784860, ILMN_1815475, ILMN_1699049, ILMN_1691188, ILMN_1763705, ILMN_1672357, ILMN_1718807, ILMN_1735093, ILMN_1689642, ILMN_1707062, ILMN_1788363, ILMN_1732885, ILMN_1659364, ILMN_1695792, ILMN_16…	886	373	13528	2.0058	0.0132806	0.00074248	0.0087854
SP_PIR_KEYWORDS	DNA damage	28	2.3198	0.000188942	ILMN_1695792, ILMN_1786433, ILMN_1740216, ILMN_1801383, ILMN_1722423, ILMN_1740976, ILMN_1763575, ILMN_1812622, ILMN_1708764, ILMN_1802620, ILMN_1781516, ILMN_1780937, ILMN_1777096, ILMN_1767894, ILMN_1714438, ILMN_1815475, ILMN_1786016, ILMN_1691188, ILMN_1814122, ILMN_1763705, ILMN_1718807, ILMN_1655382, ILMN_1735093, ILMN_1707062, ILMN_1689642, ILMN_1768717, ILMN_1788363, ILMN_1732885	1200	205	19235	2.18935	0.0846358	0.00304478	0.269216
GOTERM_BP_FAT	GO:0006281~DNA repair	36	2.9826	0.000219469	ILMN_1745852, ILMN_1659364, ILMN_1695792, ILMN_1786433, ILMN_1695797, ILMN_1740216, ILMN_1801383, ILMN_1722423, ILMN_1763575, ILMN_1778734, ILMN_1740976, ILMN_1812622, ILMN_1708764, ILMN_1781516, ILMN_1724489, ILMN_1756793, ILMN_1775885, ILMN_1780937, ILMN_1777096, ILMN_1767894, ILMN_1714438, ILMN_1784860, ILMN_1758038, ILMN_1786016, ILMN_1691188, ILMN_1699049, ILMN_1814122, ILMN_1763705, ILMN_16…	886	284	13528	1.93546	0.448221	0.017857	0.389981
GOTERM_BP_FAT	GO:0033554~cellular response to stress	60	4.971	0.000245842	ILMN_1783753, ILMN_1745852, ILMN_1737314, ILMN_1786433, ILMN_1740216, ILMN_1716480, ILMN_1778734, ILMN_1812622, ILMN_1802620, ILMN_1724489, ILMN_1695726, ILMN_1756793, ILMN_1789793, ILMN_1756787, ILMN_1767894, ILMN_1714438, ILMN_1815475, ILMN_1784860, ILMN_1691188, ILMN_1699049, ILMN_1797189, ILMN_1763705, ILMN_1690122, ILMN_1672357, ILMN_1718807, ILMN_1735093, ILMN_1707062, ILMN_1689642, ILMN_17…	886	566	13528	1.61858	0.486275	0.0188506	0.436748
SP_PIR_KEYWORDS	dna repair	26	2.1541	0.000353512	ILMN_1695792, ILMN_1786433, ILMN_1740216, ILMN_1801383, ILMN_1722423, ILMN_1740976, ILMN_1763575, ILMN_1812622, ILMN_1708764, ILMN_1781516, ILMN_1780937, ILMN_1777096, ILMN_1767894, ILMN_1714438, ILMN_1786016, ILMN_1699049, ILMN_1691188, ILMN_1814122, ILMN_1744676, ILMN_1718807, ILMN_1655382, ILMN_1689642, ILMN_1707062, ILMN_1768717, ILMN_1788363, ILMN_1732885	1200	191	19235	2.18198	0.152507	0.00515767	0.503155
Annotation Cluster 10	Enrichment Score: 4.45084209699309
Category	Term	Count	%	PValue	Genes	List Total	Pop Hits	Pop Total	Fold Enrichment	Bonferroni	Benjamini	FDR
PUBMED_ID	12228227	11	0.91135	3.42187e-07	ILMN_1789616, ILMN_1673962, ILMN_1815924, ILMN_1730999, ILMN_1784467, ILMN_1734826, ILMN_1751338, ILMN_1738681, ILMN_1652989, ILMN_1746577, ILMN_1669635	1207	30	27491	8.35131	0.00643661	0.000179356	0.000742187
GOTERM_BP_FAT	GO:0006403~RNA localization	23	1.90555	3.74679e-07	ILMN_1787689, ILMN_1686626, ILMN_1673962, ILMN_1705515, ILMN_1725121, ILMN_1734826, ILMN_1801383, ILMN_1746577, ILMN_1669635, ILMN_1747303, ILMN_1657164, ILMN_1815924, ILMN_1694323, ILMN_1784467, ILMN_1652989, ILMN_1738681, ILMN_1789616, ILMN_1797367, ILMN_1705783, ILMN_1730999, ILMN_1754912, ILMN_1751338, ILMN_1692973, ILMN_1802157, ILMN_1798163	886	100	13528	3.51178	0.00101449	7.24978e-05	0.000667006
GOTERM_BP_FAT	GO:0051236~establishment of RNA localization	22	1.8227	9.10984e-07	ILMN_1789616, ILMN_1787689, ILMN_1673962, ILMN_1686626, ILMN_1797367, ILMN_1730999, ILMN_1705783, ILMN_1705515, ILMN_1734826, ILMN_1725121, ILMN_1754912, ILMN_1751338, ILMN_1746577, ILMN_1801383, ILMN_1669635, ILMN_1802157, ILMN_1747303, ILMN_1815924, ILMN_1694323, ILMN_1784467, ILMN_1738681, ILMN_1652989, ILMN_1798163	886	97	13528	3.46299	0.00246481	0.00016451	0.00162173
GOTERM_BP_FAT	GO:0050657~nucleic acid transport	22	1.8227	9.10984e-07	ILMN_1789616, ILMN_1787689, ILMN_1673962, ILMN_1686626, ILMN_1797367, ILMN_1730999, ILMN_1705783, ILMN_1705515, ILMN_1734826, ILMN_1725121, ILMN_1754912, ILMN_1751338, ILMN_1746577, ILMN_1801383, ILMN_1669635, ILMN_1802157, ILMN_1747303, ILMN_1815924, ILMN_1694323, ILMN_1784467, ILMN_1738681, ILMN_1652989, ILMN_1798163	886	97	13528	3.46299	0.00246481	0.00016451	0.00162173
GOTERM_BP_FAT	GO:0050658~RNA transport	22	1.8227	9.10984e-07	ILMN_1789616, ILMN_1787689, ILMN_1673962, ILMN_1686626, ILMN_1797367, ILMN_1730999, ILMN_1705783, ILMN_1705515, ILMN_1734826, ILMN_1725121, ILMN_1754912, ILMN_1751338, ILMN_1746577, ILMN_1801383, ILMN_1669635, ILMN_1802157, ILMN_1747303, ILMN_1815924, ILMN_1694323, ILMN_1784467, ILMN_1738681, ILMN_1652989, ILMN_1798163	886	97	13528	3.46299	0.00246481	0.00016451	0.00162173
GOTERM_BP_FAT	GO:0051028~mRNA transport	20	1.657	2.60382e-06	ILMN_1789616, ILMN_1673962, ILMN_1686626, ILMN_1705783, ILMN_1730999, ILMN_1705515, ILMN_1734826, ILMN_1754912, ILMN_1725121, ILMN_1751338, ILMN_1746577, ILMN_1801383, ILMN_1669635, ILMN_1802157, ILMN_1747303, ILMN_1815924, ILMN_1694323, ILMN_1784467, ILMN_1738681, ILMN_1652989, ILMN_1798163	886	87	13528	3.51003	0.00702893	0.000440762	0.00463524
SP_PIR_KEYWORDS	mRNA transport	17	1.40845	1.0179e-05	ILMN_1789616, ILMN_1686626, ILMN_1673962, ILMN_1705783, ILMN_1730999, ILMN_1705515, ILMN_1734826, ILMN_1754912, ILMN_1725121, ILMN_1751338, ILMN_1669635, ILMN_1802157, ILMN_1815924, ILMN_1694323, ILMN_1784467, ILMN_1738681, ILMN_1652989, ILMN_1798163	1200	74	19235	3.68238	0.00475247	0.000216513	0.0145209
GOTERM_BP_FAT	GO:0015931~nucleobase, nucleoside, nucleotide and nucleic acid transport	22	1.8227	1.1793e-05	ILMN_1789616, ILMN_1787689, ILMN_1673962, ILMN_1686626, ILMN_1797367, ILMN_1730999, ILMN_1705783, ILMN_1705515, ILMN_1734826, ILMN_1725121, ILMN_1754912, ILMN_1751338, ILMN_1746577, ILMN_1801383, ILMN_1669635, ILMN_1802157, ILMN_1747303, ILMN_1815924, ILMN_1694323, ILMN_1784467, ILMN_1738681, ILMN_1652989, ILMN_1798163	886	113	13528	2.97265	0.0314425	0.00152015	0.020992
GOTERM_CC_FAT	GO:0005643~nuclear pore	16	1.3256	2.50908e-05	ILMN_1789616, ILMN_1673962, ILMN_1705783, ILMN_1730999, ILMN_1754912, ILMN_1725121, ILMN_1734826, ILMN_1751338, ILMN_1746577, ILMN_1669635, ILMN_1723117, ILMN_1762275, ILMN_1815924, ILMN_1694323, ILMN_1784467, ILMN_1738681, ILMN_1652989	712	79	12782	3.6359	0.0116988	0.00069198	0.0358006
GOTERM_BP_FAT	GO:0006913~nucleocytoplasmic transport	26	2.1541	2.66319e-05	ILMN_1686626, ILMN_1673962, ILMN_1737314, ILMN_1725121, ILMN_1801383, ILMN_1746577, ILMN_1723117, ILMN_1747303, ILMN_1759495, ILMN_1815924, ILMN_1694323, ILMN_1652989, ILMN_1789616, ILMN_1797367, ILMN_1748476, ILMN_1730999, ILMN_1705783, ILMN_1760256, ILMN_1764891, ILMN_1754912, ILMN_1751338, ILMN_1784766, ILMN_1802157, ILMN_1685580, ILMN_1734286, ILMN_1762275, ILMN_1762531	886	156	13528	2.54477	0.0696058	0.00313191	0.0473998
GOTERM_BP_FAT	GO:0051169~nuclear transport	26	2.1541	3.32003e-05	ILMN_1686626, ILMN_1673962, ILMN_1737314, ILMN_1725121, ILMN_1801383, ILMN_1746577, ILMN_1723117, ILMN_1747303, ILMN_1759495, ILMN_1815924, ILMN_1694323, ILMN_1652989, ILMN_1789616, ILMN_1797367, ILMN_1748476, ILMN_1730999, ILMN_1705783, ILMN_1760256, ILMN_1764891, ILMN_1754912, ILMN_1751338, ILMN_1784766, ILMN_1802157, ILMN_1685580, ILMN_1734286, ILMN_1762275, ILMN_1762531	886	158	13528	2.51256	0.0860149	0.00374053	0.0590869
GOTERM_BP_FAT	GO:0051168~nuclear export	14	1.1599	0.000107001	ILMN_1789616, ILMN_1686626, ILMN_1797367, ILMN_1705783, ILMN_1754912, ILMN_1725121, ILMN_1751338, ILMN_1746577, ILMN_1801383, ILMN_1802157, ILMN_1747303, ILMN_1759495, ILMN_1815924, ILMN_1694323, ILMN_1652989	886	60	13528	3.56268	0.251648	0.010679	0.190314
SP_PIR_KEYWORDS	nuclear pore complex	11	0.91135	0.000129347	ILMN_1789616, ILMN_1673962, ILMN_1815924, ILMN_1730999, ILMN_1694323, ILMN_1784467, ILMN_1754912, ILMN_1734826, ILMN_1751338, ILMN_1738681, ILMN_1652989, ILMN_1669635	1200	40	19235	4.40802	0.0587421	0.00223964	0.184374
GOTERM_CC_FAT	GO:0005635~nuclear envelope	26	2.1541	0.000181486	ILMN_1673962, ILMN_1700606, ILMN_1734826, ILMN_1725121, ILMN_1746577, ILMN_1669635, ILMN_1723117, ILMN_1680996, ILMN_1815924, ILMN_1694323, ILMN_1784467, ILMN_1801421, ILMN_1652989, ILMN_1738681, ILMN_1772316, ILMN_1789616, ILMN_1658160, ILMN_1756439, ILMN_1730999, ILMN_1705783, ILMN_1754912, ILMN_1751338, ILMN_1746276, ILMN_1726683, ILMN_1762275, ILMN_1680860, ILMN_1754579	712	205	12782	2.27687	0.0816021	0.00404534	0.258683
GOTERM_BP_FAT	GO:0006406~mRNA export from nucleus	10	0.8285	0.000194638	ILMN_1747303, ILMN_1686626, ILMN_1815924, ILMN_1705783, ILMN_1694323, ILMN_1754912, ILMN_1751338, ILMN_1801383, ILMN_1652989, ILMN_1746577, ILMN_1802157	886	33	13528	4.62686	0.409819	0.0168667	0.345931
GOTERM_CC_FAT	GO:0046930~pore complex	16	1.3256	0.000224517	ILMN_1789616, ILMN_1673962, ILMN_1705783, ILMN_1730999, ILMN_1754912, ILMN_1725121, ILMN_1734826, ILMN_1751338, ILMN_1746577, ILMN_1669635, ILMN_1723117, ILMN_1762275, ILMN_1815924, ILMN_1694323, ILMN_1784467, ILMN_1738681, ILMN_1652989	712	95	12782	3.02354	0.0999548	0.00477539	0.319926
GOTERM_BP_FAT	GO:0006405~RNA export from nucleus	11	0.91135	0.000237614	ILMN_1747303, ILMN_1686626, ILMN_1797367, ILMN_1815924, ILMN_1705783, ILMN_1694323, ILMN_1754912, ILMN_1751338, ILMN_1801383, ILMN_1652989, ILMN_1746577, ILMN_1802157	886	41	13528	4.09646	0.474693	0.0187564	0.42216
SP_PIR_KEYWORDS	translocation	11	0.91135	0.0161662	ILMN_1789616, ILMN_1673962, ILMN_1815924, ILMN_1730999, ILMN_1694323, ILMN_1784467, ILMN_1754912, ILMN_1734826, ILMN_1751338, ILMN_1738681, ILMN_1652989, ILMN_1669635	1200	74	19235	2.38271	0.999513	0.1528	20.7466
GOTERM_BP_FAT	GO:0055085~transmembrane transport	29	2.40265	0.958517	ILMN_1687495, ILMN_1673962, ILMN_1662648, ILMN_1691290, ILMN_1651964, ILMN_1734826, ILMN_1699357, ILMN_1669635, ILMN_1813568, ILMN_1674874, ILMN_1815924, ILMN_1694323, ILMN_1688633, ILMN_1784467, ILMN_1738681, ILMN_1652989, ILMN_1756338, ILMN_1789616, ILMN_1722056, ILMN_1721138, ILMN_1708341, ILMN_1668586, ILMN_1730999, ILMN_1717701, ILMN_1754912, ILMN_1751338, ILMN_1755016, ILMN_1776119, ILMN_16…	886	569	13528	0.77819	1	1	100
Annotation Cluster 11	Enrichment Score: 4.1715391513965345
Category	Term	Count	%	PValue	Genes	List Total	Pop Hits	Pop Total	Fold Enrichment	Bonferroni	Benjamini	FDR
UP_SEQ_FEATURE	domain:Helicase ATP-binding	29	2.40265	1.14821e-10	ILMN_1814173, ILMN_1665414, ILMN_1686626, ILMN_1654583, ILMN_1814859, ILMN_1730059, ILMN_1778930, ILMN_1740216, ILMN_1673023, ILMN_1748077, ILMN_1747303, ILMN_1716922, ILMN_1695983, ILMN_1799387, ILMN_1732226, ILMN_1797425, ILMN_1712320, ILMN_1781721, ILMN_1735679, ILMN_1727001, ILMN_1805344, ILMN_1673820, ILMN_1786016, ILMN_1741976, ILMN_1756220, ILMN_1796572, ILMN_1720440, ILMN_1697503, ILMN_16…	1199	110	19113	4.20257	3.44118e-07	2.15074e-08	2.06732e-07
INTERPRO	IPR002464:DNA/RNA helicase, ATP-dependent, DEAH-box type, conserved site	10	0.8285	0.00070604	ILMN_1716922, ILMN_1654583, ILMN_1786016, ILMN_1730059, ILMN_1778930, ILMN_1732226, ILMN_1697503, ILMN_1653047, ILMN_1735679, ILMN_1673023	1081	39	16659	3.95147	0.632419	0.0540832	1.15868
UP_SEQ_FEATURE	short sequence motif:DEAH box	10	0.8285	0.000984694	ILMN_1716922, ILMN_1654583, ILMN_1786016, ILMN_1730059, ILMN_1778930, ILMN_1796572, ILMN_1720440, ILMN_1697503, ILMN_1653047, ILMN_1735679	1199	42	19113	3.79542	0.947795	0.0711561	1.75815
INTERPRO	IPR011709:Region of unknown function DUF1605	6	0.4971	0.00364057	ILMN_1716922, ILMN_1730059, ILMN_1732226, ILMN_1697503, ILMN_1653047, ILMN_1735679	1081	17	16659	5.43908	0.994305	0.186756	5.84074
INTERPRO	IPR007502:Helicase-associated region	6	0.4971	0.00477511	ILMN_1716922, ILMN_1730059, ILMN_1732226, ILMN_1697503, ILMN_1653047, ILMN_1735679	1081	18	16659	5.13691	0.998867	0.208544	7.5944
Annotation Cluster 12	Enrichment Score: 4.046955679398658
Category	Term	Count	%	PValue	Genes	List Total	Pop Hits	Pop Total	Fold Enrichment	Bonferroni	Benjamini	FDR
GOTERM_BP_FAT	GO:0016568~chromatin modification	55	4.55675	1.66407e-13	ILMN_1794260, ILMN_1814173, ILMN_1697919, ILMN_1706539, ILMN_1778930, ILMN_1760201, ILMN_1660368, ILMN_1673023, ILMN_1668414, ILMN_1764970, ILMN_1688638, ILMN_1698441, ILMN_1802620, ILMN_1736080, ILMN_1758823, ILMN_1692026, ILMN_1707175, ILMN_1781131, ILMN_1746171, ILMN_1815475, ILMN_1741976, ILMN_1657515, ILMN_1691188, ILMN_1666399, ILMN_1797341, ILMN_1797189, ILMN_1692021, ILMN_1746276, ILMN_18…	886	274	13528	3.06487	4.50838e-10	9.01677e-11	2.96263e-10
GOTERM_BP_FAT	GO:0051276~chromosome organization	77	6.37945	6.08666e-13	ILMN_1794260, ILMN_1814173, ILMN_1699636, ILMN_1697919, ILMN_1706539, ILMN_1778930, ILMN_1760201, ILMN_1660368, ILMN_1685631, ILMN_1716480, ILMN_1673023, ILMN_1681503, ILMN_1668414, ILMN_1764970, ILMN_1688638, ILMN_1698441, ILMN_1728556, ILMN_1802620, ILMN_1756793, ILMN_1736080, ILMN_1678962, ILMN_1758823, ILMN_1692026, ILMN_1707175, ILMN_1746171, ILMN_1781131, ILMN_1815475, ILMN_1722059, ILMN_17…	886	485	13528	2.42409	1.64876e-09	2.06095e-10	1.08348e-09
SP_PIR_KEYWORDS	chromatin regulator	45	3.72825	1.36202e-12	ILMN_1794260, ILMN_1814173, ILMN_1769473, ILMN_1654583, ILMN_1697919, ILMN_1706539, ILMN_1778930, ILMN_1795247, ILMN_1797813, ILMN_1760201, ILMN_1730019, ILMN_1660368, ILMN_1673023, ILMN_1668414, ILMN_1734380, ILMN_1764970, ILMN_1688638, ILMN_1698441, ILMN_1802620, ILMN_1762085, ILMN_1736080, ILMN_1758823, ILMN_1692026, ILMN_1673820, ILMN_1707175, ILMN_1746171, ILMN_1781131, ILMN_1755727, ILMN_17…	1200	213	19235	3.38644	6.37426e-10	4.24951e-11	1.94312e-09
GOTERM_BP_FAT	GO:0006325~chromatin organization	61	5.05385	1.08915e-10	ILMN_1794260, ILMN_1814173, ILMN_1697919, ILMN_1706539, ILMN_1778930, ILMN_1760201, ILMN_1660368, ILMN_1673023, ILMN_1681503, ILMN_1668414, ILMN_1764970, ILMN_1688638, ILMN_1698441, ILMN_1802620, ILMN_1736080, ILMN_1758823, ILMN_1692026, ILMN_1707175, ILMN_1746171, ILMN_1781131, ILMN_1815475, ILMN_1722059, ILMN_1741976, ILMN_1657515, ILMN_1691188, ILMN_1666399, ILMN_1797341, ILMN_1797189, ILMN_16…	886	378	13528	2.46398	2.9505e-07	2.68227e-08	1.93891e-07
GOTERM_BP_FAT	GO:0016569~covalent chromatin modification	24	1.9884	6.27248e-06	ILMN_1747419, ILMN_1814173, ILMN_1692026, ILMN_1707175, ILMN_1769473, ILMN_1815475, ILMN_1697919, ILMN_1657515, ILMN_1691188, ILMN_1666399, ILMN_1783606, ILMN_1797813, ILMN_1801488, ILMN_1730019, ILMN_1660368, ILMN_1797189, ILMN_1804679, ILMN_1673023, ILMN_1746276, ILMN_1698441, ILMN_1772455, ILMN_1736015, ILMN_1812208, ILMN_1708105	886	126	13528	2.90831	0.0168486	0.000893926	0.0111657
GOTERM_BP_FAT	GO:0016570~histone modification	23	1.90555	1.21479e-05	ILMN_1747419, ILMN_1692026, ILMN_1707175, ILMN_1769473, ILMN_1815475, ILMN_1697919, ILMN_1657515, ILMN_1691188, ILMN_1666399, ILMN_1783606, ILMN_1797813, ILMN_1801488, ILMN_1730019, ILMN_1660368, ILMN_1797189, ILMN_1804679, ILMN_1673023, ILMN_1746276, ILMN_1698441, ILMN_1772455, ILMN_1736015, ILMN_1812208, ILMN_1708105	886	122	13528	2.87851	0.0323732	0.00149474	0.0216236
GOTERM_CC_FAT	GO:0000123~histone acetyltransferase complex	9	0.74565	0.00593631	ILMN_1698441, ILMN_1736015, ILMN_1737535, ILMN_1801488, ILMN_1730019, ILMN_1684802, ILMN_1660368, ILMN_1673023, ILMN_1746276	712	50	12782	3.2314	0.938728	0.0835643	8.14586
GOTERM_BP_FAT	GO:0006473~protein amino acid acetylation	10	0.8285	0.00608411	ILMN_1747419, ILMN_1669142, ILMN_1698441, ILMN_1736015, ILMN_1801488, ILMN_1730019, ILMN_1660368, ILMN_1804679, ILMN_1673023, ILMN_1746276	886	52	13528	2.93627	1	0.202656	10.2947
GOTERM_BP_FAT	GO:0016573~histone acetylation	9	0.74565	0.0118728	ILMN_1747419, ILMN_1698441, ILMN_1736015, ILMN_1801488, ILMN_1730019, ILMN_1660368, ILMN_1804679, ILMN_1673023, ILMN_1746276	886	48	13528	2.86287	1	0.319677	19.1541
GOTERM_BP_FAT	GO:0043543~protein amino acid acylation	10	0.8285	0.0153685	ILMN_1747419, ILMN_1669142, ILMN_1698441, ILMN_1736015, ILMN_1801488, ILMN_1730019, ILMN_1660368, ILMN_1804679, ILMN_1673023, ILMN_1746276	886	60	13528	2.54477	1	0.37922	24.0972
INTERPRO	IPR019542:Enhancer of polycomb-like	3	0.24855	0.0905877	ILMN_1736015, ILMN_1730019, ILMN_1746276	1081	8	16659	5.77902	1	0.909531	79.1304
GOTERM_BP_FAT	GO:0043966~histone H3 acetylation	4	0.3314	0.240087	ILMN_1698441, ILMN_1736015, ILMN_1801488, ILMN_1730019	886	26	13528	2.34902	1	0.972486	99.2461
GOTERM_MF_FAT	GO:0004468~lysine N-acetyltransferase activity	5	0.41425	0.249315	ILMN_1698441, ILMN_1801488, ILMN_1684802, ILMN_1804679, ILMN_1746276	872	38	12983	1.95905	1	0.928649	98.8144
GOTERM_MF_FAT	GO:0004402~histone acetyltransferase activity	5	0.41425	0.249315	ILMN_1698441, ILMN_1801488, ILMN_1684802, ILMN_1804679, ILMN_1746276	872	38	12983	1.95905	1	0.928649	98.8144
GOTERM_MF_FAT	GO:0016407~acetyltransferase activity	7	0.57995	0.474499	ILMN_1669142, ILMN_1698441, ILMN_1801488, ILMN_1684802, ILMN_1804679, ILMN_1746276, ILMN_1699859	872	82	12983	1.27099	1	0.987659	99.9952
GOTERM_MF_FAT	GO:0008080~N-acetyltransferase activity	6	0.4971	0.496572	ILMN_1669142, ILMN_1698441, ILMN_1801488, ILMN_1684802, ILMN_1804679, ILMN_1746276	872	69	12983	1.29467	1	0.990083	99.9975
GOTERM_MF_FAT	GO:0016410~N-acyltransferase activity	6	0.4971	0.662128	ILMN_1669142, ILMN_1698441, ILMN_1801488, ILMN_1684802, ILMN_1804679, ILMN_1746276	872	83	12983	1.0763	1	0.998074	100
Annotation Cluster 13	Enrichment Score: 4.02626707939201
Category	Term	Count	%	PValue	Genes	List Total	Pop Hits	Pop Total	Fold Enrichment	Bonferroni	Benjamini	FDR
INTERPRO	IPR019786:Zinc finger, PHD-type, conserved site	24	1.9884	1.74673e-08	ILMN_1794260, ILMN_1682316, ILMN_1697919, ILMN_1730019, ILMN_1691444, ILMN_1722423, ILMN_1668414, ILMN_1734380, ILMN_1736015, ILMN_1698441, ILMN_1743538, ILMN_1715032, ILMN_1770119, ILMN_1707175, ILMN_1682197, ILMN_1755727, ILMN_1815475, ILMN_1726025, ILMN_1783606, ILMN_1698968, ILMN_1812934, ILMN_1720850, ILMN_1699496, ILMN_1804610, ILMN_1661770	1081	93	16659	3.97696	2.47509e-05	3.53588e-06	2.88227e-05
INTERPRO	IPR019787:Zinc finger, PHD-finger	21	1.73985	3.55155e-07	ILMN_1794260, ILMN_1715032, ILMN_1770119, ILMN_1707175, ILMN_1755727, ILMN_1815475, ILMN_1682316, ILMN_1697919, ILMN_1783606, ILMN_1730019, ILMN_1812934, ILMN_1692021, ILMN_1691444, ILMN_1720850, ILMN_1722423, ILMN_1668414, ILMN_1734380, ILMN_1699496, ILMN_1698441, ILMN_1736015, ILMN_1804610, ILMN_1743538	1081	85	16659	3.80736	0.000503128	5.59156e-05	0.000586037
INTERPRO	IPR001965:Zinc finger, PHD-type	21	1.73985	9.45599e-07	ILMN_1794260, ILMN_1715032, ILMN_1770119, ILMN_1707175, ILMN_1755727, ILMN_1815475, ILMN_1682316, ILMN_1697919, ILMN_1783606, ILMN_1730019, ILMN_1812934, ILMN_1692021, ILMN_1691444, ILMN_1720850, ILMN_1722423, ILMN_1668414, ILMN_1734380, ILMN_1699496, ILMN_1698441, ILMN_1736015, ILMN_1661770, ILMN_1743538	1081	90	16659	3.59584	0.00133902	0.000121803	0.00156032
SMART	SM00249:PHD	21	1.73985	1.11145e-05	ILMN_1794260, ILMN_1715032, ILMN_1770119, ILMN_1707175, ILMN_1755727, ILMN_1815475, ILMN_1682316, ILMN_1697919, ILMN_1783606, ILMN_1730019, ILMN_1812934, ILMN_1692021, ILMN_1691444, ILMN_1720850, ILMN_1722423, ILMN_1668414, ILMN_1734380, ILMN_1699496, ILMN_1698441, ILMN_1736015, ILMN_1661770, ILMN_1743538	696	90	9079	3.04373	0.0032956	0.00065999	0.0148286
UP_SEQ_FEATURE	zinc finger region:PHD-type	12	0.9942	0.000312983	ILMN_1794260, ILMN_1722423, ILMN_1715032, ILMN_1668414, ILMN_1699496, ILMN_1815475, ILMN_1682316, ILMN_1783606, ILMN_1730019, ILMN_1812934, ILMN_1691444, ILMN_1720850	1199	52	19113	3.67864	0.608652	0.0280287	0.562021
UP_SEQ_FEATURE	zinc finger region:PHD-type 1	9	0.74565	0.000789329	ILMN_1734380, ILMN_1770119, ILMN_1707175, ILMN_1755727, ILMN_1697919, ILMN_1698441, ILMN_1736015, ILMN_1661770, ILMN_1743538, ILMN_1692021	1199	33	19113	4.34749	0.906196	0.0588764	1.41167
UP_SEQ_FEATURE	zinc finger region:PHD-type 2	8	0.6628	0.00212406	ILMN_1734380, ILMN_1770119, ILMN_1707175, ILMN_1755727, ILMN_1697919, ILMN_1698441, ILMN_1661770, ILMN_1743538, ILMN_1692021	1199	30	19113	4.25088	0.998292	0.132043	3.75603
UP_SEQ_FEATURE	zinc finger region:PHD-type 3	3	0.24855	0.126465	ILMN_1707175, ILMN_1755727, ILMN_1697919	1199	10	19113	4.78224	1	0.978133	91.2347
OMIM_DISEASE	Leukemia, acute myeloid	3	0.24855	0.134103	ILMN_1770119, ILMN_1707175, ILMN_1697919, ILMN_1743538	159	15	3671	4.61761	1	1	85.0853
Annotation Cluster 14	Enrichment Score: 3.653482666623012
Category	Term	Count	%	PValue	Genes	List Total	Pop Hits	Pop Total	Fold Enrichment	Bonferroni	Benjamini	FDR
SP_PIR_KEYWORDS	ubl conjugation	65	5.38525	9.5865e-06	ILMN_1699636, ILMN_1732519, ILMN_1760542, ILMN_1760201, ILMN_1691444, ILMN_1676010, ILMN_1776147, ILMN_1688638, ILMN_1667657, ILMN_1705114, ILMN_1707308, ILMN_1705928, ILMN_1745385, ILMN_1736080, ILMN_1746171, ILMN_1708174, ILMN_1671583, ILMN_1760884, ILMN_1691188, ILMN_1810474, ILMN_1675497, ILMN_1780598, ILMN_1814215, ILMN_1720850, ILMN_1763705, ILMN_1714965, ILMN_1693145, ILMN_1672357, ILMN_18…	1200	588	19235	1.77193	0.00447646	0.00021362	0.0136757
UP_SEQ_FEATURE	cross-link:Glycyl lysine isopeptide (Lys-Gly) (interchain with G-Cter in ubiquitin)	26	2.1541	0.000709978	ILMN_1730294, ILMN_1710092, ILMN_1775637, ILMN_1699636, ILMN_1695792, ILMN_1760542, ILMN_1776147, ILMN_1786852, ILMN_1667657, ILMN_1721621, ILMN_1707308, ILMN_1767260, ILMN_1762085, ILMN_1727142, ILMN_1736080, ILMN_1810474, ILMN_1657016, ILMN_1720850, ILMN_1763705, ILMN_1693145, ILMN_1752677, ILMN_1760143, ILMN_1651684, ILMN_1772455, ILMN_1741477, ILMN_1740842	1199	199	19113	2.08272	0.880991	0.0559051	1.27061
SP_PIR_KEYWORDS	isopeptide bond	35	2.89975	0.00160934	ILMN_1730294, ILMN_1775637, ILMN_1710092, ILMN_1699636, ILMN_1695792, ILMN_1760542, ILMN_1676010, ILMN_1776147, ILMN_1786852, ILMN_1688638, ILMN_1667657, ILMN_1815941, ILMN_1721621, ILMN_1707308, ILMN_1767260, ILMN_1705928, ILMN_1762085, ILMN_1804735, ILMN_1727142, ILMN_1736080, ILMN_1777096, ILMN_1746171, ILMN_1798354, ILMN_1810474, ILMN_1765574, ILMN_1657016, ILMN_1720850, ILMN_1763705, ILMN_16…	1200	319	19235	1.75869	0.529414	0.0201662	2.2716
Annotation Cluster 15	Enrichment Score: 3.2460097152995675
Category	Term	Count	%	PValue	Genes	List Total	Pop Hits	Pop Total	Fold Enrichment	Bonferroni	Benjamini	FDR
INTERPRO	IPR003309:Transcriptional regulator SCAN	13	1.07705	0.000241462	ILMN_1685467, ILMN_1760982, ILMN_1651905, ILMN_1761409, ILMN_1791949, ILMN_1749838, ILMN_1804637, ILMN_1684591, ILMN_1815309, ILMN_1745917, ILMN_1669516, ILMN_1775085, ILMN_1700238, ILMN_1809566	1081	57	16659	3.51473	0.289789	0.02116	0.397691
UP_SEQ_FEATURE	domain:SCAN box	12	0.9942	0.00071729	ILMN_1685467, ILMN_1760982, ILMN_1651905, ILMN_1761409, ILMN_1791949, ILMN_1804637, ILMN_1749838, ILMN_1815309, ILMN_1745917, ILMN_1669516, ILMN_1775085, ILMN_1700238, ILMN_1809566	1199	57	19113	3.35595	0.883573	0.0550203	1.28362
SMART	SM00431:SCAN	13	1.07705	0.00105542	ILMN_1685467, ILMN_1760982, ILMN_1651905, ILMN_1761409, ILMN_1791949, ILMN_1749838, ILMN_1804637, ILMN_1684591, ILMN_1815309, ILMN_1745917, ILMN_1669516, ILMN_1775085, ILMN_1700238, ILMN_1809566	696	57	9079	2.97507	0.269208	0.0384448	1.39907
Annotation Cluster 16	Enrichment Score: 3.100878032291502
Category	Term	Count	%	PValue	Genes	List Total	Pop Hits	Pop Total	Fold Enrichment	Bonferroni	Benjamini	FDR
GOTERM_CC_FAT	GO:0035097~histone methyltransferase complex	8	0.6628	9.36043e-05	ILMN_1697639, ILMN_1732705, ILMN_1680193, ILMN_1695797, ILMN_1783606, ILMN_1797813, ILMN_1701855, ILMN_1708105	712	21	12782	6.83895	0.0429527	0.00219272	0.133498
GOTERM_CC_FAT	GO:0034708~methyltransferase complex	8	0.6628	9.36043e-05	ILMN_1697639, ILMN_1732705, ILMN_1680193, ILMN_1695797, ILMN_1783606, ILMN_1797813, ILMN_1701855, ILMN_1708105	712	21	12782	6.83895	0.0429527	0.00219272	0.133498
PUBMED_ID	19377461	4	0.3314	0.00579761	ILMN_1697639, ILMN_1732705, ILMN_1783606, ILMN_1701855	1207	9	27491	10.1228	1	0.696588	11.8486
GOTERM_CC_FAT	GO:0070688~MLL5-L complex	4	0.3314	0.00777404	ILMN_1697639, ILMN_1732705, ILMN_1783606, ILMN_1701855	712	8	12782	8.97612	0.974275	0.0992966	10.5397
Annotation Cluster 17	Enrichment Score: 3.0185322872533624
Category	Term	Count	%	PValue	Genes	List Total	Pop Hits	Pop Total	Fold Enrichment	Bonferroni	Benjamini	FDR
GOTERM_MF_FAT	GO:0005487~nucleocytoplasmic transporter activity	7	0.57995	6.31814e-06	ILMN_1815924, ILMN_1705783, ILMN_1705515, ILMN_1751338, ILMN_1738681, ILMN_1652989, ILMN_1798163	872	9	12983	11.5801	0.00533719	0.00048638	0.00977065
PUBMED_ID	11546874	4	0.3314	0.00399471	ILMN_1697670, ILMN_1705783, ILMN_1705515, ILMN_1798163	1207	8	27491	11.3882	1	0.576141	8.31553
PUBMED_ID	11546873	3	0.24855	0.0348601	ILMN_1705783, ILMN_1705515, ILMN_1798163	1207	7	27491	9.76127	1	0.99349	53.68
Annotation Cluster 18	Enrichment Score: 2.952800818964471
Category	Term	Count	%	PValue	Genes	List Total	Pop Hits	Pop Total	Fold Enrichment	Bonferroni	Benjamini	FDR
GOTERM_BP_FAT	GO:0010629~negative regulation of gene expression	56	4.6396	0.000123405	ILMN_1814173, ILMN_1691294, ILMN_1737314, ILMN_1772522, ILMN_1718629, ILMN_1774387, ILMN_1760201, ILMN_1655137, ILMN_1774382, ILMN_1671326, ILMN_1688638, ILMN_1764177, ILMN_1698441, ILMN_1775192, ILMN_1802758, ILMN_1744986, ILMN_1707175, ILMN_1691188, ILMN_1688103, ILMN_1810474, ILMN_1692021, ILMN_1746276, ILMN_1804679, ILMN_1756541, ILMN_1789018, ILMN_1714965, ILMN_1682091, ILMN_1672357, ILMN_16…	886	504	13528	1.69651	0.284179	0.0114622	0.219459
GOTERM_BP_FAT	GO:0010558~negative regulation of macromolecule biosynthetic process	58	4.8053	0.000318818	ILMN_1814173, ILMN_1691294, ILMN_1737314, ILMN_1772522, ILMN_1718629, ILMN_1774387, ILMN_1760201, ILMN_1716480, ILMN_1774382, ILMN_1671326, ILMN_1688638, ILMN_1764177, ILMN_1698441, ILMN_1775192, ILMN_1765091, ILMN_1802758, ILMN_1744986, ILMN_1707175, ILMN_1691188, ILMN_1688103, ILMN_1810474, ILMN_1692021, ILMN_1746276, ILMN_1804679, ILMN_1756541, ILMN_1789018, ILMN_1714965, ILMN_1682091, ILMN_16…	886	547	13528	1.61898	0.57845	0.023076	0.566046
GOTERM_BP_FAT	GO:0016481~negative regulation of transcription	50	4.1425	0.000468682	ILMN_1814173, ILMN_1691294, ILMN_1737314, ILMN_1772522, ILMN_1718629, ILMN_1774387, ILMN_1760201, ILMN_1774382, ILMN_1688638, ILMN_1764177, ILMN_1698441, ILMN_1775192, ILMN_1802758, ILMN_1744986, ILMN_1707175, ILMN_1688103, ILMN_1691188, ILMN_1810474, ILMN_1692021, ILMN_1746276, ILMN_1804679, ILMN_1756541, ILMN_1789018, ILMN_1714965, ILMN_1672357, ILMN_1682091, ILMN_1699496, ILMN_1735093, ILMN_17…	886	459	13528	1.66325	0.719157	0.0297845	0.831076
GOTERM_BP_FAT	GO:0031327~negative regulation of cellular biosynthetic process	58	4.8053	0.000587998	ILMN_1814173, ILMN_1691294, ILMN_1737314, ILMN_1772522, ILMN_1718629, ILMN_1774387, ILMN_1760201, ILMN_1716480, ILMN_1774382, ILMN_1671326, ILMN_1688638, ILMN_1764177, ILMN_1698441, ILMN_1775192, ILMN_1765091, ILMN_1802758, ILMN_1744986, ILMN_1707175, ILMN_1691188, ILMN_1688103, ILMN_1810474, ILMN_1692021, ILMN_1746276, ILMN_1804679, ILMN_1756541, ILMN_1789018, ILMN_1714965, ILMN_1682091, ILMN_16…	886	561	13528	1.57857	0.796758	0.0355648	1.04161
GOTERM_BP_FAT	GO:0009890~negative regulation of biosynthetic process	58	4.8053	0.000999805	ILMN_1814173, ILMN_1691294, ILMN_1737314, ILMN_1772522, ILMN_1718629, ILMN_1774387, ILMN_1760201, ILMN_1716480, ILMN_1774382, ILMN_1671326, ILMN_1688638, ILMN_1764177, ILMN_1698441, ILMN_1775192, ILMN_1765091, ILMN_1802758, ILMN_1744986, ILMN_1707175, ILMN_1691188, ILMN_1688103, ILMN_1810474, ILMN_1692021, ILMN_1746276, ILMN_1804679, ILMN_1756541, ILMN_1789018, ILMN_1714965, ILMN_1682091, ILMN_16…	886	573	13528	1.54552	0.933452	0.0584411	1.76499
GOTERM_BP_FAT	GO:0045934~negative regulation of nucleobase, nucleoside, nucleotide and nucleic acid metabolic process	53	4.39105	0.00102967	ILMN_1814173, ILMN_1691294, ILMN_1737314, ILMN_1772522, ILMN_1718629, ILMN_1774387, ILMN_1760201, ILMN_1716480, ILMN_1774382, ILMN_1688638, ILMN_1764177, ILMN_1698441, ILMN_1775192, ILMN_1802758, ILMN_1744986, ILMN_1707175, ILMN_1691188, ILMN_1688103, ILMN_1810474, ILMN_1692021, ILMN_1746276, ILMN_1804679, ILMN_1756541, ILMN_1789018, ILMN_1714965, ILMN_1672357, ILMN_1682091, ILMN_1699496, ILMN_17…	886	512	13528	1.58054	0.938629	0.0576506	1.81726
GOTERM_MF_FAT	GO:0016564~transcription repressor activity	37	3.06545	0.0012514	ILMN_1757408, ILMN_1750079, ILMN_1691294, ILMN_1737314, ILMN_1812795, ILMN_1718629, ILMN_1710598, ILMN_1815309, ILMN_1774382, ILMN_1688638, ILMN_1701957, ILMN_1764177, ILMN_1698441, ILMN_1775192, ILMN_1734867, ILMN_1802758, ILMN_1744986, ILMN_1707175, ILMN_1687567, ILMN_1755727, ILMN_1696087, ILMN_1696407, ILMN_1666399, ILMN_1712560, ILMN_1691559, ILMN_1810474, ILMN_1747146, ILMN_1746276, ILMN_17…	872	316	12983	1.7433	0.653751	0.0542915	1.91789
GOTERM_BP_FAT	GO:0010605~negative regulation of macromolecule metabolic process	70	5.7995	0.00138792	ILMN_1814173, ILMN_1691294, ILMN_1737314, ILMN_1772522, ILMN_1718629, ILMN_1760542, ILMN_1774387, ILMN_1760201, ILMN_1716480, ILMN_1671696, ILMN_1655137, ILMN_1774382, ILMN_1671326, ILMN_1688638, ILMN_1764177, ILMN_1698441, ILMN_1775192, ILMN_1765091, ILMN_1802758, ILMN_1744986, ILMN_1707175, ILMN_1691188, ILMN_1688103, ILMN_1810474, ILMN_1804679, ILMN_1692021, ILMN_1746276, ILMN_1756541, ILMN_17…	886	734	13528	1.45614	0.976774	0.0753918	2.44219
GOTERM_BP_FAT	GO:0051172~negative regulation of nitrogen compound metabolic process	53	4.39105	0.00140579	ILMN_1814173, ILMN_1691294, ILMN_1737314, ILMN_1772522, ILMN_1718629, ILMN_1774387, ILMN_1760201, ILMN_1716480, ILMN_1774382, ILMN_1688638, ILMN_1764177, ILMN_1698441, ILMN_1775192, ILMN_1802758, ILMN_1744986, ILMN_1707175, ILMN_1691188, ILMN_1688103, ILMN_1810474, ILMN_1692021, ILMN_1746276, ILMN_1804679, ILMN_1756541, ILMN_1789018, ILMN_1714965, ILMN_1672357, ILMN_1682091, ILMN_1699496, ILMN_17…	886	519	13528	1.55922	0.977873	0.0748274	2.47327
GOTERM_BP_FAT	GO:0045892~negative regulation of transcription, DNA-dependent	39	3.23115	0.00196196	ILMN_1814173, ILMN_1750079, ILMN_1691294, ILMN_1737314, ILMN_1772522, ILMN_1718629, ILMN_1797813, ILMN_1774387, ILMN_1760201, ILMN_1710598, ILMN_1774382, ILMN_1688638, ILMN_1764177, ILMN_1815941, ILMN_1673207, ILMN_1734867, ILMN_1747419, ILMN_1802758, ILMN_1707175, ILMN_1687567, ILMN_1755727, ILMN_1689817, ILMN_1688103, ILMN_1810474, ILMN_1657868, ILMN_1784217, ILMN_1747146, ILMN_1692021, ILMN_17…	886	356	13528	1.67269	0.995108	0.0955069	3.43572
GOTERM_BP_FAT	GO:0051253~negative regulation of RNA metabolic process	39	3.23115	0.00262867	ILMN_1814173, ILMN_1750079, ILMN_1691294, ILMN_1737314, ILMN_1772522, ILMN_1718629, ILMN_1797813, ILMN_1774387, ILMN_1760201, ILMN_1710598, ILMN_1774382, ILMN_1688638, ILMN_1764177, ILMN_1815941, ILMN_1673207, ILMN_1734867, ILMN_1747419, ILMN_1802758, ILMN_1707175, ILMN_1687567, ILMN_1755727, ILMN_1689817, ILMN_1688103, ILMN_1810474, ILMN_1657868, ILMN_1784217, ILMN_1747146, ILMN_1692021, ILMN_17…	886	362	13528	1.64496	0.9992	0.121592	4.57765
GOTERM_BP_FAT	GO:0000122~negative regulation of transcription from RNA polymerase II promoter	27	2.23695	0.0262143	ILMN_1814173, ILMN_1737314, ILMN_1772522, ILMN_1718629, ILMN_1797813, ILMN_1760201, ILMN_1710598, ILMN_1774382, ILMN_1815941, ILMN_1764177, ILMN_1673207, ILMN_1734867, ILMN_1747419, ILMN_1802758, ILMN_1707175, ILMN_1687567, ILMN_1689817, ILMN_1688103, ILMN_1784217, ILMN_1746276, ILMN_1692021, ILMN_1756541, ILMN_1714965, ILMN_1682091, ILMN_1699496, ILMN_1792666, ILMN_1772455, ILMN_1804610	886	266	13528	1.54982	1	0.509581	37.6805
Annotation Cluster 19	Enrichment Score: 2.776017602254439
Category	Term	Count	%	PValue	Genes	List Total	Pop Hits	Pop Total	Fold Enrichment	Bonferroni	Benjamini	FDR
GOTERM_BP_FAT	GO:0044265~cellular macromolecule catabolic process	80	6.628	4.38354e-06	ILMN_1794260, ILMN_1783753, ILMN_1660222, ILMN_1714428, ILMN_1705515, ILMN_1681304, ILMN_1725862, ILMN_1740216, ILMN_1760542, ILMN_1798712, ILMN_1809285, ILMN_1671696, ILMN_1691444, ILMN_1655137, ILMN_1715616, ILMN_1668414, ILMN_1671326, ILMN_1695726, ILMN_1678962, ILMN_1756787, ILMN_1783675, ILMN_1714438, ILMN_1760884, ILMN_1666399, ILMN_1810474, ILMN_1675497, ILMN_1780598, ILMN_1717337, ILMN_17…	886	725	13528	1.68481	0.0118048	0.000698288	0.00780334
GOTERM_BP_FAT	GO:0009057~macromolecule catabolic process	84	6.9594	6.60134e-06	ILMN_1794260, ILMN_1783753, ILMN_1660222, ILMN_1714428, ILMN_1705515, ILMN_1681304, ILMN_1725862, ILMN_1740216, ILMN_1760542, ILMN_1798712, ILMN_1809285, ILMN_1671696, ILMN_1691444, ILMN_1655137, ILMN_1715616, ILMN_1668414, ILMN_1671326, ILMN_1695726, ILMN_1669878, ILMN_1678962, ILMN_1756787, ILMN_1783675, ILMN_1714438, ILMN_1760884, ILMN_1666399, ILMN_1810474, ILMN_1675497, ILMN_1780598, ILMN_17…	886	781	13528	1.64221	0.0177241	0.000893755	0.0117511
SP_PIR_KEYWORDS	ubl conjugation pathway	52	4.3082	0.000560822	ILMN_1794260, ILMN_1660222, ILMN_1714428, ILMN_1798712, ILMN_1725862, ILMN_1691444, ILMN_1715616, ILMN_1668414, ILMN_1783675, ILMN_1760884, ILMN_1671583, ILMN_1786328, ILMN_1666399, ILMN_1810474, ILMN_1675497, ILMN_1780598, ILMN_1717337, ILMN_1770641, ILMN_1804610, ILMN_1812161, ILMN_1761858, ILMN_1704342, ILMN_1756874, ILMN_1692706, ILMN_1756873, ILMN_1739454, ILMN_1682316, ILMN_1695792, ILMN_17…	1200	509	19235	1.63756	0.230903	0.00792415	0.797125
GOTERM_BP_FAT	GO:0051603~proteolysis involved in cellular protein catabolic process	58	4.8053	0.00284136	ILMN_1794260, ILMN_1660222, ILMN_1714428, ILMN_1725862, ILMN_1760542, ILMN_1798712, ILMN_1671696, ILMN_1691444, ILMN_1715616, ILMN_1668414, ILMN_1695726, ILMN_1783675, ILMN_1760884, ILMN_1666399, ILMN_1810474, ILMN_1675497, ILMN_1780598, ILMN_1717337, ILMN_1714965, ILMN_1693145, ILMN_1770641, ILMN_1720926, ILMN_1804610, ILMN_1812161, ILMN_1761858, ILMN_1704342, ILMN_1756874, ILMN_1739454, ILMN_16…	886	600	13528	1.47597	0.999551	0.128593	4.93927
GOTERM_BP_FAT	GO:0044257~cellular protein catabolic process	58	4.8053	0.00315418	ILMN_1794260, ILMN_1660222, ILMN_1714428, ILMN_1725862, ILMN_1760542, ILMN_1798712, ILMN_1671696, ILMN_1691444, ILMN_1715616, ILMN_1668414, ILMN_1695726, ILMN_1783675, ILMN_1760884, ILMN_1666399, ILMN_1810474, ILMN_1675497, ILMN_1780598, ILMN_1717337, ILMN_1714965, ILMN_1693145, ILMN_1770641, ILMN_1720926, ILMN_1804610, ILMN_1812161, ILMN_1761858, ILMN_1704342, ILMN_1756874, ILMN_1739454, ILMN_16…	886	603	13528	1.46862	0.999808	0.137185	5.46875
GOTERM_BP_FAT	GO:0030163~protein catabolic process	59	4.88815	0.00392791	ILMN_1794260, ILMN_1660222, ILMN_1714428, ILMN_1725862, ILMN_1760542, ILMN_1798712, ILMN_1671696, ILMN_1691444, ILMN_1715616, ILMN_1668414, ILMN_1695726, ILMN_1783675, ILMN_1760884, ILMN_1666399, ILMN_1810474, ILMN_1675497, ILMN_1780598, ILMN_1717337, ILMN_1714965, ILMN_1693145, ILMN_1770641, ILMN_1720926, ILMN_1804610, ILMN_1812161, ILMN_1769031, ILMN_1761858, ILMN_1704342, ILMN_1756874, ILMN_17…	886	622	13528	1.44831	0.999977	0.160359	6.76646
GOTERM_BP_FAT	GO:0043632~modification-dependent macromolecule catabolic process	55	4.55675	0.00442307	ILMN_1794260, ILMN_1660222, ILMN_1714428, ILMN_1725862, ILMN_1760542, ILMN_1798712, ILMN_1691444, ILMN_1671696, ILMN_1715616, ILMN_1668414, ILMN_1695726, ILMN_1783675, ILMN_1760884, ILMN_1666399, ILMN_1810474, ILMN_1675497, ILMN_1780598, ILMN_1717337, ILMN_1693145, ILMN_1770641, ILMN_1720926, ILMN_1804610, ILMN_1812161, ILMN_1761858, ILMN_1704342, ILMN_1756874, ILMN_1739454, ILMN_1692706, ILMN_17…	886	574	13528	1.46302	0.999994	0.168687	7.58812
GOTERM_BP_FAT	GO:0019941~modification-dependent protein catabolic process	55	4.55675	0.00442307	ILMN_1794260, ILMN_1660222, ILMN_1714428, ILMN_1725862, ILMN_1760542, ILMN_1798712, ILMN_1691444, ILMN_1671696, ILMN_1715616, ILMN_1668414, ILMN_1695726, ILMN_1783675, ILMN_1760884, ILMN_1666399, ILMN_1810474, ILMN_1675497, ILMN_1780598, ILMN_1717337, ILMN_1693145, ILMN_1770641, ILMN_1720926, ILMN_1804610, ILMN_1812161, ILMN_1761858, ILMN_1704342, ILMN_1756874, ILMN_1739454, ILMN_1692706, ILMN_17…	886	574	13528	1.46302	0.999994	0.168687	7.58812
GOTERM_BP_FAT	GO:0006511~ubiquitin-dependent protein catabolic process	25	2.07125	0.0273304	ILMN_1756873, ILMN_1739454, ILMN_1695792, ILMN_1760542, ILMN_1725862, ILMN_1798712, ILMN_1671696, ILMN_1691444, ILMN_1763575, ILMN_1658373, ILMN_1741253, ILMN_1693438, ILMN_1665538, ILMN_1686319, ILMN_1695726, ILMN_1722953, ILMN_1659523, ILMN_1745887, ILMN_1799688, ILMN_1653828, ILMN_1810474, ILMN_1747146, ILMN_1792825, ILMN_1693145, ILMN_1720926	886	242	13528	1.57734	1	0.517523	38.9398
GOTERM_BP_FAT	GO:0006508~proteolysis	69	5.71665	0.568687	ILMN_1794260, ILMN_1660222, ILMN_1714428, ILMN_1739872, ILMN_1725862, ILMN_1760542, ILMN_1798712, ILMN_1685002, ILMN_1671696, ILMN_1691444, ILMN_1715616, ILMN_1668414, ILMN_1667657, ILMN_1789830, ILMN_1695726, ILMN_1756787, ILMN_1783675, ILMN_1760884, ILMN_1657515, ILMN_1651719, ILMN_1666399, ILMN_1669015, ILMN_1810474, ILMN_1675497, ILMN_1780598, ILMN_1717337, ILMN_1714965, ILMN_1693145, ILMN_17…	886	1054	13528	0.999559	1	0.998995	100
Annotation Cluster 20	Enrichment Score: 2.757232331735118
Category	Term	Count	%	PValue	Genes	List Total	Pop Hits	Pop Total	Fold Enrichment	Bonferroni	Benjamini	FDR
GOTERM_MF_FAT	GO:0008134~transcription factor binding	57	4.72245	0.000198643	ILMN_1814173, ILMN_1691294, ILMN_1754923, ILMN_1705218, ILMN_1758049, ILMN_1718629, ILMN_1810488, ILMN_1740216, ILMN_1760201, ILMN_1660368, ILMN_1789526, ILMN_1761828, ILMN_1815309, ILMN_1764970, ILMN_1669425, ILMN_1688638, ILMN_1701957, ILMN_1698441, ILMN_1738681, ILMN_1805344, ILMN_1707175, ILMN_1696407, ILMN_1697117, ILMN_1666399, ILMN_1675497, ILMN_1692021, ILMN_1804679, ILMN_1780598, ILMN_17…	872	513	12983	1.65431	0.154872	0.0139244	0.306763
GOTERM_MF_FAT	GO:0016563~transcription activator activity	47	3.89395	0.000393528	ILMN_1814173, ILMN_1754923, ILMN_1718629, ILMN_1695797, ILMN_1810488, ILMN_1801488, ILMN_1688964, ILMN_1660368, ILMN_1751368, ILMN_1676010, ILMN_1669425, ILMN_1688638, ILMN_1698441, ILMN_1721729, ILMN_1681703, ILMN_1803060, ILMN_1721081, ILMN_1753407, ILMN_1778991, ILMN_1727142, ILMN_1802758, ILMN_1768495, ILMN_1673820, ILMN_1795852, ILMN_1764891, ILMN_1737535, ILMN_1674551, ILMN_1731648, ILMN_16…	872	410	12983	1.70676	0.283505	0.0206209	0.606867
GOTERM_MF_FAT	GO:0003712~transcription cofactor activity	38	3.1483	0.00705925	ILMN_1691294, ILMN_1754923, ILMN_1718629, ILMN_1695797, ILMN_1810488, ILMN_1801488, ILMN_1660368, ILMN_1710598, ILMN_1775743, ILMN_1815309, ILMN_1688638, ILMN_1701957, ILMN_1721729, ILMN_1803060, ILMN_1721081, ILMN_1768495, ILMN_1805344, ILMN_1707175, ILMN_1696407, ILMN_1795852, ILMN_1737535, ILMN_1666399, ILMN_1712560, ILMN_1783606, ILMN_1747146, ILMN_1765574, ILMN_1780598, ILMN_1772165, ILMN_16…	872	363	12983	1.5586	0.997522	0.192894	10.3771
GOTERM_MF_FAT	GO:0003713~transcription coactivator activity	24	1.9884	0.0169537	ILMN_1768495, ILMN_1754923, ILMN_1795852, ILMN_1737535, ILMN_1666399, ILMN_1695797, ILMN_1718629, ILMN_1783606, ILMN_1801488, ILMN_1810488, ILMN_1765574, ILMN_1747146, ILMN_1660368, ILMN_1780598, ILMN_1772165, ILMN_1661717, ILMN_1661173, ILMN_1732705, ILMN_1672357, ILMN_1727761, ILMN_1721729, ILMN_1803060, ILMN_1706839, ILMN_1721081	872	214	12983	1.66977	0.999999	0.32391	23.2363
Annotation Cluster 21	Enrichment Score: 2.7344317610773077
Category	Term	Count	%	PValue	Genes	List Total	Pop Hits	Pop Total	Fold Enrichment	Bonferroni	Benjamini	FDR
INTERPRO	IPR001841:Zinc finger, RING-type	37	3.06545	0.000201519	ILMN_1810441, ILMN_1702124, ILMN_1682316, ILMN_1807767, ILMN_1697919, ILMN_1700606, ILMN_1691444, ILMN_1682626, ILMN_1687107, ILMN_1756657, ILMN_1722423, ILMN_1694174, ILMN_1734380, ILMN_1777660, ILMN_1792078, ILMN_1663727, ILMN_1763433, ILMN_1747419, ILMN_1715032, ILMN_1673820, ILMN_1707175, ILMN_1682197, ILMN_1815475, ILMN_1736562, ILMN_1671583, ILMN_1738704, ILMN_1653828, ILMN_1666399, ILMN_17…	1081	296	16659	1.92634	0.248422	0.0188586	0.332006
INTERPRO	IPR018957:Zinc finger, C3HC4 RING-type	28	2.3198	0.001782	ILMN_1761858, ILMN_1810441, ILMN_1807767, ILMN_1702124, ILMN_1700606, ILMN_1682626, ILMN_1687107, ILMN_1691444, ILMN_1756657, ILMN_1694174, ILMN_1792078, ILMN_1663727, ILMN_1763433, ILMN_1747419, ILMN_1715032, ILMN_1673820, ILMN_1671583, ILMN_1738704, ILMN_1736562, ILMN_1653828, ILMN_1666399, ILMN_1717337, ILMN_1685580, ILMN_1744676, ILMN_1674260, ILMN_1752677, ILMN_1811997, ILMN_1804610	1081	228	16659	1.89255	0.92013	0.11339	2.90021
INTERPRO	IPR017907:Zinc finger, RING-type, conserved site	32	2.6512	0.00249643	ILMN_1761858, ILMN_1810441, ILMN_1682316, ILMN_1807767, ILMN_1702124, ILMN_1700606, ILMN_1691444, ILMN_1682626, ILMN_1687107, ILMN_1756657, ILMN_1722423, ILMN_1694174, ILMN_1777660, ILMN_1792078, ILMN_1663727, ILMN_1763433, ILMN_1747419, ILMN_1715032, ILMN_1673820, ILMN_1682197, ILMN_1671583, ILMN_1738704, ILMN_1736562, ILMN_1653828, ILMN_1666399, ILMN_1792825, ILMN_1685580, ILMN_1744676, ILMN_16…	1081	280	16659	1.76123	0.971041	0.142723	4.04059
SMART	SM00184:RING	37	3.06545	0.00363228	ILMN_1810441, ILMN_1702124, ILMN_1682316, ILMN_1807767, ILMN_1697919, ILMN_1700606, ILMN_1691444, ILMN_1682626, ILMN_1687107, ILMN_1756657, ILMN_1722423, ILMN_1694174, ILMN_1734380, ILMN_1777660, ILMN_1792078, ILMN_1663727, ILMN_1763433, ILMN_1747419, ILMN_1715032, ILMN_1673820, ILMN_1707175, ILMN_1682197, ILMN_1815475, ILMN_1736562, ILMN_1671583, ILMN_1738704, ILMN_1653828, ILMN_1666399, ILMN_17…	696	296	9079	1.63057	0.66066	0.10244	4.73923
UP_SEQ_FEATURE	zinc finger region:RING-type	24	1.9884	0.00653309	ILMN_1761858, ILMN_1747419, ILMN_1810441, ILMN_1673820, ILMN_1702124, ILMN_1682316, ILMN_1671583, ILMN_1738704, ILMN_1736562, ILMN_1653828, ILMN_1666399, ILMN_1691444, ILMN_1682626, ILMN_1756657, ILMN_1722423, ILMN_1685580, ILMN_1744676, ILMN_1674260, ILMN_1694174, ILMN_1752677, ILMN_1792078, ILMN_1811997, ILMN_1663727, ILMN_1763433	1199	210	19113	1.8218	1	0.300341	11.1315
Annotation Cluster 22	Enrichment Score: 2.6355855316444203
Category	Term	Count	%	PValue	Genes	List Total	Pop Hits	Pop Total	Fold Enrichment	Bonferroni	Benjamini	FDR
GOTERM_MF_FAT	GO:0005487~nucleocytoplasmic transporter activity	7	0.57995	6.31814e-06	ILMN_1815924, ILMN_1705783, ILMN_1705515, ILMN_1751338, ILMN_1738681, ILMN_1652989, ILMN_1798163	872	9	12983	11.5801	0.00533719	0.00048638	0.00977065
PUBMED_ID	15146057	4	0.3314	0.00579761	ILMN_1815924, ILMN_1751338, ILMN_1652989, ILMN_1669635	1207	9	27491	10.1228	1	0.696588	11.8486
PUBMED_ID	11564755	3	0.24855	0.010875	ILMN_1815924, ILMN_1751338, ILMN_1652989	1207	4	27491	17.0822	1	0.85725	21.114
PUBMED_ID	11684705	3	0.24855	0.010875	ILMN_1815924, ILMN_1751338, ILMN_1652989	1207	4	27491	17.0822	1	0.85725	21.114
GOTERM_CC_FAT	GO:0031080~Nup107-160 complex	4	0.3314	0.0153241	ILMN_1815924, ILMN_1751338, ILMN_1652989, ILMN_1669635	712	10	12782	7.1809	0.999285	0.173534	19.7786
Annotation Cluster 23	Enrichment Score: 2.4527750234186545
Category	Term	Count	%	PValue	Genes	List Total	Pop Hits	Pop Total	Fold Enrichment	Bonferroni	Benjamini	FDR
UP_SEQ_FEATURE	domain:SAP	7	0.57995	0.00239886	ILMN_1722059, ILMN_1699636, ILMN_1742224, ILMN_1663061, ILMN_1718571, ILMN_1675497, ILMN_1780598	1199	23	19113	4.85154	0.999252	0.136618	4.2321
INTERPRO	IPR003034:DNA-binding SAP	7	0.57995	0.00284131	ILMN_1722059, ILMN_1699636, ILMN_1742224, ILMN_1663061, ILMN_1718571, ILMN_1675497, ILMN_1780598	1081	23	16659	4.69022	0.982259	0.154641	4.58659
SMART	SM00513:SAP	7	0.57995	0.00642913	ILMN_1722059, ILMN_1699636, ILMN_1742224, ILMN_1663061, ILMN_1718571, ILMN_1675497, ILMN_1780598	696	23	9079	3.97008	0.852749	0.159827	8.24589
Annotation Cluster 24	Enrichment Score: 2.422151714930359
Category	Term	Count	%	PValue	Genes	List Total	Pop Hits	Pop Total	Fold Enrichment	Bonferroni	Benjamini	FDR
SP_PIR_KEYWORDS	cell cycle	55	4.55675	5.9884e-06	ILMN_1660222, ILMN_1651942, ILMN_1786433, ILMN_1685631, ILMN_1691444, ILMN_1681503, ILMN_1761828, ILMN_1779185, ILMN_1728556, ILMN_1802620, ILMN_1701855, ILMN_1756793, ILMN_1762407, ILMN_1758823, ILMN_1810474, ILMN_1695357, ILMN_1693145, ILMN_1732705, ILMN_1765704, ILMN_1718807, ILMN_1735093, ILMN_1776577, ILMN_1758778, ILMN_1728934, ILMN_1683441, ILMN_1788363, ILMN_1750075, ILMN_1712386, ILMN_16…	1200	461	19235	1.91237	0.00279865	0.000140119	0.00854298
GOTERM_BP_FAT	GO:0007059~chromosome segregation	16	1.3256	0.000212362	ILMN_1807807, ILMN_1799688, ILMN_1810474, ILMN_1685631, ILMN_1741572, ILMN_1695357, ILMN_1693145, ILMN_1688638, ILMN_1718807, ILMN_1728556, ILMN_1751886, ILMN_1690136, ILMN_1776577, ILMN_1756793, ILMN_1683441, ILMN_1788363	886	81	13528	3.01602	0.437492	0.017819	0.377376
GOTERM_BP_FAT	GO:0000070~mitotic sister chromatid segregation	10	0.8285	0.00039792	ILMN_1741572, ILMN_1695357, ILMN_1693145, ILMN_1728556, ILMN_1799688, ILMN_1776577, ILMN_1690136, ILMN_1756793, ILMN_1683441, ILMN_1685631	886	36	13528	4.24128	0.659786	0.0259543	0.706018
GOTERM_BP_FAT	GO:0000819~sister chromatid segregation	10	0.8285	0.00049569	ILMN_1741572, ILMN_1695357, ILMN_1693145, ILMN_1728556, ILMN_1799688, ILMN_1776577, ILMN_1690136, ILMN_1756793, ILMN_1683441, ILMN_1685631	886	37	13528	4.12665	0.73898	0.0307534	0.878768
GOTERM_BP_FAT	GO:0007049~cell cycle	74	6.1309	0.00101015	ILMN_1660222, ILMN_1651942, ILMN_1786433, ILMN_1760542, ILMN_1685631, ILMN_1745994, ILMN_1671696, ILMN_1691444, ILMN_1761828, ILMN_1681503, ILMN_1754407, ILMN_1779185, ILMN_1728556, ILMN_1802620, ILMN_1756793, ILMN_1701855, ILMN_1762407, ILMN_1758823, ILMN_1684038, ILMN_1810474, ILMN_1654421, ILMN_1789018, ILMN_1741572, ILMN_1695357, ILMN_1693145, ILMN_1732705, ILMN_1765704, ILMN_1672357, ILMN_17…	886	776	13528	1.45603	0.935292	0.0577824	1.7831
SP_PIR_KEYWORDS	cell division	31	2.56835	0.00108936	ILMN_1651942, ILMN_1685631, ILMN_1712386, ILMN_1676737, ILMN_1779185, ILMN_1728556, ILMN_1701855, ILMN_1756793, ILMN_1762407, ILMN_1787922, ILMN_1807807, ILMN_1653828, ILMN_1795852, ILMN_1799688, ILMN_1741801, ILMN_1810474, ILMN_1747146, ILMN_1720124, ILMN_1712452, ILMN_1695357, ILMN_1693145, ILMN_1769118, ILMN_1765704, ILMN_1752677, ILMN_1718807, ILMN_1735093, ILMN_1689001, ILMN_1758778, ILMN_17…	1200	264	19235	1.88221	0.399564	0.0144686	1.54295
GOTERM_BP_FAT	GO:0022403~cell cycle phase	44	3.6454	0.00174602	ILMN_1660222, ILMN_1651942, ILMN_1695792, ILMN_1810628, ILMN_1712386, ILMN_1685631, ILMN_1761828, ILMN_1676737, ILMN_1754407, ILMN_1728556, ILMN_1665538, ILMN_1751886, ILMN_1690136, ILMN_1769606, ILMN_1756793, ILMN_1792305, ILMN_1677532, ILMN_1787922, ILMN_1684038, ILMN_1807807, ILMN_1653828, ILMN_1795852, ILMN_1799688, ILMN_1741801, ILMN_1810474, ILMN_1670875, ILMN_1720124, ILMN_1772165, ILMN_17…	886	414	13528	1.62275	0.99121	0.0870194	3.06311
GOTERM_BP_FAT	GO:0000278~mitotic cell cycle	39	3.23115	0.00382548	ILMN_1660222, ILMN_1651942, ILMN_1695792, ILMN_1760542, ILMN_1712386, ILMN_1685631, ILMN_1671696, ILMN_1761828, ILMN_1676737, ILMN_1728556, ILMN_1665538, ILMN_1690136, ILMN_1756793, ILMN_1677532, ILMN_1787922, ILMN_1684038, ILMN_1807807, ILMN_1653828, ILMN_1795852, ILMN_1799688, ILMN_1741801, ILMN_1810474, ILMN_1670875, ILMN_1720124, ILMN_1772165, ILMN_1712452, ILMN_1741572, ILMN_1654421, ILMN_16…	886	370	13528	1.6094	0.999969	0.158906	6.59564
GOTERM_BP_FAT	GO:0022402~cell cycle process	53	4.39105	0.00776313	ILMN_1660222, ILMN_1651942, ILMN_1760542, ILMN_1685631, ILMN_1745994, ILMN_1671696, ILMN_1761828, ILMN_1754407, ILMN_1728556, ILMN_1756793, ILMN_1684038, ILMN_1810474, ILMN_1654421, ILMN_1789018, ILMN_1741572, ILMN_1695357, ILMN_1693145, ILMN_1765704, ILMN_1672357, ILMN_1718807, ILMN_1735093, ILMN_1720926, ILMN_1776577, ILMN_1728934, ILMN_1683441, ILMN_1788363, ILMN_1695792, ILMN_1810628, ILMN_17…	886	565	13528	1.43228	1	0.242547	12.9545
GOTERM_BP_FAT	GO:0000087~M phase of mitotic cell cycle	25	2.07125	0.0117107	ILMN_1651942, ILMN_1685631, ILMN_1712386, ILMN_1676737, ILMN_1728556, ILMN_1690136, ILMN_1756793, ILMN_1677532, ILMN_1787922, ILMN_1684038, ILMN_1807807, ILMN_1799688, ILMN_1653828, ILMN_1810474, ILMN_1720124, ILMN_1741572, ILMN_1654421, ILMN_1712452, ILMN_1693145, ILMN_1695357, ILMN_1765704, ILMN_1718807, ILMN_1735093, ILMN_1776577, ILMN_1683441	886	224	13528	1.70409	1	0.322377	18.9177
GOTERM_BP_FAT	GO:0000279~M phase	33	2.73405	0.0159383	ILMN_1651942, ILMN_1712386, ILMN_1685631, ILMN_1676737, ILMN_1754407, ILMN_1728556, ILMN_1751886, ILMN_1690136, ILMN_1769606, ILMN_1756793, ILMN_1792305, ILMN_1677532, ILMN_1787922, ILMN_1684038, ILMN_1807807, ILMN_1653828, ILMN_1799688, ILMN_1810474, ILMN_1720124, ILMN_1789018, ILMN_1741572, ILMN_1654421, ILMN_1712452, ILMN_1695357, ILMN_1693145, ILMN_1765704, ILMN_1718807, ILMN_1735093, ILMN_17…	886	329	13528	1.5315	1	0.386786	24.8753
GOTERM_BP_FAT	GO:0007067~mitosis	24	1.9884	0.0175153	ILMN_1677532, ILMN_1787922, ILMN_1651942, ILMN_1684038, ILMN_1807807, ILMN_1653828, ILMN_1799688, ILMN_1810474, ILMN_1712386, ILMN_1685631, ILMN_1720124, ILMN_1676737, ILMN_1741572, ILMN_1712452, ILMN_1695357, ILMN_1693145, ILMN_1765704, ILMN_1718807, ILMN_1735093, ILMN_1728556, ILMN_1776577, ILMN_1690136, ILMN_1683441, ILMN_1756793	886	220	13528	1.66567	1	0.409058	26.9899
GOTERM_BP_FAT	GO:0000280~nuclear division	24	1.9884	0.0175153	ILMN_1677532, ILMN_1787922, ILMN_1651942, ILMN_1684038, ILMN_1807807, ILMN_1653828, ILMN_1799688, ILMN_1810474, ILMN_1712386, ILMN_1685631, ILMN_1720124, ILMN_1676737, ILMN_1741572, ILMN_1712452, ILMN_1695357, ILMN_1693145, ILMN_1765704, ILMN_1718807, ILMN_1735093, ILMN_1728556, ILMN_1776577, ILMN_1690136, ILMN_1683441, ILMN_1756793	886	220	13528	1.66567	1	0.409058	26.9899
GOTERM_BP_FAT	GO:0030261~chromosome condensation	6	0.4971	0.0210391	ILMN_1741572, ILMN_1678962, ILMN_1699636, ILMN_1728556, ILMN_1756793, ILMN_1683441	886	25	13528	3.66447	1	0.444445	31.5137
GOTERM_BP_FAT	GO:0048285~organelle fission	24	1.9884	0.026641	ILMN_1677532, ILMN_1787922, ILMN_1651942, ILMN_1684038, ILMN_1807807, ILMN_1653828, ILMN_1799688, ILMN_1810474, ILMN_1712386, ILMN_1685631, ILMN_1720124, ILMN_1676737, ILMN_1741572, ILMN_1712452, ILMN_1695357, ILMN_1693145, ILMN_1765704, ILMN_1718807, ILMN_1735093, ILMN_1728556, ILMN_1776577, ILMN_1690136, ILMN_1683441, ILMN_1756793	886	229	13528	1.60021	1	0.511858	38.1648
GOTERM_BP_FAT	GO:0051301~cell division	29	2.40265	0.0303428	ILMN_1651942, ILMN_1685631, ILMN_1712386, ILMN_1676737, ILMN_1779185, ILMN_1728556, ILMN_1701855, ILMN_1756793, ILMN_1762407, ILMN_1787922, ILMN_1807807, ILMN_1653828, ILMN_1795852, ILMN_1799688, ILMN_1810474, ILMN_1741801, ILMN_1747146, ILMN_1720124, ILMN_1712452, ILMN_1769118, ILMN_1765704, ILMN_1752677, ILMN_1718807, ILMN_1735093, ILMN_1689001, ILMN_1758778, ILMN_1728934, ILMN_1683441, ILMN_17…	886	295	13528	1.50098	1	0.541643	42.2202
SP_PIR_KEYWORDS	mitosis	19	1.57415	0.0370873	ILMN_1651942, ILMN_1787922, ILMN_1807807, ILMN_1653828, ILMN_1799688, ILMN_1810474, ILMN_1712386, ILMN_1685631, ILMN_1720124, ILMN_1676737, ILMN_1712452, ILMN_1695357, ILMN_1693145, ILMN_1718807, ILMN_1735093, ILMN_1728556, ILMN_1756793, ILMN_1683441, ILMN_1778557	1200	183	19235	1.66423	1	0.297941	41.6765
GOTERM_BP_FAT	GO:0007076~mitotic chromosome condensation	4	0.3314	0.0487333	ILMN_1741572, ILMN_1728556, ILMN_1756793, ILMN_1683441	886	13	13528	4.69804	1	0.676277	58.9101
Annotation Cluster 25	Enrichment Score: 2.3334263021681174
Category	Term	Count	%	PValue	Genes	List Total	Pop Hits	Pop Total	Fold Enrichment	Bonferroni	Benjamini	FDR
UP_SEQ_FEATURE	zinc finger region:C2H2-type 14	28	2.3198	1.5548e-06	ILMN_1757408, ILMN_1741313, ILMN_1709377, ILMN_1711361, ILMN_1759375, ILMN_1658080, ILMN_1716921, ILMN_1728230, ILMN_1718950, ILMN_1663160, ILMN_1815885, ILMN_1679747, ILMN_1672743, ILMN_1801156, ILMN_1728710, ILMN_1656504, ILMN_1664928, ILMN_1784281, ILMN_1672135, ILMN_1675788, ILMN_1670377, ILMN_1742935, ILMN_1676745, ILMN_1806782, ILMN_1748527, ILMN_1731813, ILMN_1663754, ILMN_1655167	1199	157	19113	2.84294	0.00464889	0.000245219	0.00279933
UP_SEQ_FEATURE	zinc finger region:C2H2-type 15	23	1.90555	2.97352e-05	ILMN_1757408, ILMN_1784281, ILMN_1672135, ILMN_1709377, ILMN_1741313, ILMN_1711361, ILMN_1675788, ILMN_1670377, ILMN_1658080, ILMN_1742935, ILMN_1716921, ILMN_1728230, ILMN_1718950, ILMN_1663160, ILMN_1806782, ILMN_1676745, ILMN_1815885, ILMN_1679747, ILMN_1748527, ILMN_1731813, ILMN_1663754, ILMN_1728710, ILMN_1656504	1199	134	19113	2.7361	0.0852621	0.00355836	0.0535238
UP_SEQ_FEATURE	zinc finger region:C2H2-type 16	15	1.24275	0.00493456	ILMN_1672135, ILMN_1711361, ILMN_1709377, ILMN_1742935, ILMN_1658080, ILMN_1728230, ILMN_1718950, ILMN_1663160, ILMN_1806782, ILMN_1676745, ILMN_1679747, ILMN_1815885, ILMN_1731813, ILMN_1663754, ILMN_1656504	1199	103	19113	2.32147	1	0.240083	8.52142
UP_SEQ_FEATURE	zinc finger region:C2H2-type 18	9	0.74565	0.0533423	ILMN_1728230, ILMN_1718950, ILMN_1663160, ILMN_1672135, ILMN_1676745, ILMN_1679747, ILMN_1709377, ILMN_1731813, ILMN_1658080	1199	66	19113	2.17374	1	0.855259	62.7299
UP_SEQ_FEATURE	zinc finger region:C2H2-type 17	10	0.8285	0.0750426	ILMN_1728230, ILMN_1718950, ILMN_1663160, ILMN_1672135, ILMN_1676745, ILMN_1679747, ILMN_1815885, ILMN_1709377, ILMN_1731813, ILMN_1658080	1199	83	19113	1.92058	1	0.912428	75.4511
UP_SEQ_FEATURE	zinc finger region:C2H2-type 19	7	0.57995	0.128613	ILMN_1718950, ILMN_1663160, ILMN_1672135, ILMN_1676745, ILMN_1679747, ILMN_1731813, ILMN_1658080	1199	55	19113	2.02883	1	0.978848	91.6147
UP_SEQ_FEATURE	zinc finger region:C2H2-type 20	4	0.3314	0.394602	ILMN_1663160, ILMN_1676745, ILMN_1679747, ILMN_1731813	1199	36	19113	1.7712	1	0.999966	99.9881
Annotation Cluster 26	Enrichment Score: 2.3244449871473503
Category	Term	Count	%	PValue	Genes	List Total	Pop Hits	Pop Total	Fold Enrichment	Bonferroni	Benjamini	FDR
UP_SEQ_FEATURE	nucleotide phosphate-binding region:ATP	89	7.37365	0.000212408	ILMN_1814173, ILMN_1686626, ILMN_1665414, ILMN_1704195, ILMN_1763491, ILMN_1772521, ILMN_1778930, ILMN_1692527, ILMN_1740216, ILMN_1699357, ILMN_1813489, ILMN_1673023, ILMN_1689896, ILMN_1664172, ILMN_1748077, ILMN_1676159, ILMN_1747303, ILMN_1681503, ILMN_1706154, ILMN_1728556, ILMN_1802620, ILMN_1797425, ILMN_1724489, ILMN_1712320, ILMN_1761175, ILMN_1705928, ILMN_1732066, ILMN_1811489, ILMN_16…	1199	962	19113	1.47477	0.47094	0.0196988	0.381745
SP_PIR_KEYWORDS	atp-binding	115	9.52775	0.000244816	ILMN_1771593, ILMN_1814173, ILMN_1665414, ILMN_1704195, ILMN_1763491, ILMN_1772521, ILMN_1778930, ILMN_1740216, ILMN_1692527, ILMN_1699357, ILMN_1808789, ILMN_1673023, ILMN_1689896, ILMN_1748077, ILMN_1664172, ILMN_1676159, ILMN_1747303, ILMN_1760174, ILMN_1782057, ILMN_1706154, ILMN_1728556, ILMN_1802620, ILMN_1811489, ILMN_1651832, ILMN_1651296, ILMN_1789793, ILMN_1805344, ILMN_1741976, ILMN_16…	1200	1326	19235	1.39016	0.108266	0.00381231	0.348699
GOTERM_MF_FAT	GO:0000166~nucleotide binding	190	15.7415	0.000308486	ILMN_1771593, ILMN_1665414, ILMN_1704195, ILMN_1808789, ILMN_1689896, ILMN_1748077, ILMN_1676159, ILMN_1747303, ILMN_1760174, ILMN_1782057, ILMN_1728556, ILMN_1657893, ILMN_1651832, ILMN_1789793, ILMN_1699049, ILMN_1697735, ILMN_1813846, ILMN_1688000, ILMN_1655497, ILMN_1809890, ILMN_1744676, ILMN_1697469, ILMN_1679476, ILMN_1720440, ILMN_1692261, ILMN_1653047, ILMN_1769031, ILMN_1743910, ILMN_17…	872	2245	12983	1.26007	0.229972	0.0184931	0.476015
GOTERM_MF_FAT	GO:0005524~ATP binding	127	10.522	0.00240438	ILMN_1771593, ILMN_1814173, ILMN_1665414, ILMN_1704195, ILMN_1763491, ILMN_1772521, ILMN_1778930, ILMN_1740216, ILMN_1692527, ILMN_1699357, ILMN_1808789, ILMN_1673023, ILMN_1689896, ILMN_1748077, ILMN_1664172, ILMN_1676159, ILMN_1747303, ILMN_1760174, ILMN_1782057, ILMN_1706154, ILMN_1728556, ILMN_1802620, ILMN_1811489, ILMN_1651832, ILMN_1651296, ILMN_1789793, ILMN_1805344, ILMN_1741976, ILMN_16…	872	1477	12983	1.28021	0.869837	0.092529	3.65445
GOTERM_MF_FAT	GO:0032559~adenyl ribonucleotide binding	127	10.522	0.00364091	ILMN_1771593, ILMN_1814173, ILMN_1665414, ILMN_1704195, ILMN_1763491, ILMN_1772521, ILMN_1778930, ILMN_1740216, ILMN_1692527, ILMN_1699357, ILMN_1808789, ILMN_1673023, ILMN_1689896, ILMN_1748077, ILMN_1664172, ILMN_1676159, ILMN_1747303, ILMN_1760174, ILMN_1782057, ILMN_1706154, ILMN_1728556, ILMN_1802620, ILMN_1811489, ILMN_1651832, ILMN_1651296, ILMN_1789793, ILMN_1805344, ILMN_1741976, ILMN_16…	872	1497	12983	1.26311	0.954474	0.131016	5.48485
GOTERM_MF_FAT	GO:0030554~adenyl nucleotide binding	132	10.9362	0.00469281	ILMN_1771593, ILMN_1814173, ILMN_1665414, ILMN_1704195, ILMN_1763491, ILMN_1772521, ILMN_1778930, ILMN_1740216, ILMN_1692527, ILMN_1699357, ILMN_1808789, ILMN_1673023, ILMN_1689896, ILMN_1748077, ILMN_1664172, ILMN_1676159, ILMN_1747303, ILMN_1760174, ILMN_1782057, ILMN_1706154, ILMN_1728556, ILMN_1657893, ILMN_1802620, ILMN_1811489, ILMN_1651832, ILMN_1651296, ILMN_1789793, ILMN_1805344, ILMN_17…	872	1577	12983	1.24624	0.981392	0.147316	7.01629
GOTERM_MF_FAT	GO:0001883~purine nucleoside binding	133	11.0191	0.0059784	ILMN_1771593, ILMN_1814173, ILMN_1665414, ILMN_1704195, ILMN_1763491, ILMN_1772521, ILMN_1778930, ILMN_1740216, ILMN_1692527, ILMN_1699357, ILMN_1808789, ILMN_1673023, ILMN_1689896, ILMN_1748077, ILMN_1664172, ILMN_1676159, ILMN_1747303, ILMN_1760174, ILMN_1782057, ILMN_1706154, ILMN_1728556, ILMN_1657893, ILMN_1802620, ILMN_1811489, ILMN_1651832, ILMN_1651296, ILMN_1789793, ILMN_1805344, ILMN_17…	872	1601	12983	1.23686	0.993773	0.171474	8.85644
GOTERM_MF_FAT	GO:0001882~nucleoside binding	133	11.0191	0.00762108	ILMN_1771593, ILMN_1814173, ILMN_1665414, ILMN_1704195, ILMN_1763491, ILMN_1772521, ILMN_1778930, ILMN_1740216, ILMN_1692527, ILMN_1699357, ILMN_1808789, ILMN_1673023, ILMN_1689896, ILMN_1748077, ILMN_1664172, ILMN_1676159, ILMN_1747303, ILMN_1760174, ILMN_1782057, ILMN_1706154, ILMN_1728556, ILMN_1657893, ILMN_1802620, ILMN_1811489, ILMN_1651832, ILMN_1651296, ILMN_1789793, ILMN_1805344, ILMN_17…	872	1612	12983	1.22842	0.998466	0.200238	11.1582
SP_PIR_KEYWORDS	nucleotide-binding	128	10.6048	0.0141566	ILMN_1771593, ILMN_1814173, ILMN_1665414, ILMN_1793269, ILMN_1704195, ILMN_1763491, ILMN_1772521, ILMN_1778930, ILMN_1740216, ILMN_1692527, ILMN_1699357, ILMN_1808789, ILMN_1673023, ILMN_1689896, ILMN_1748077, ILMN_1664172, ILMN_1676159, ILMN_1747303, ILMN_1760174, ILMN_1782057, ILMN_1706154, ILMN_1728556, ILMN_1802620, ILMN_1811489, ILMN_1651832, ILMN_1651296, ILMN_1789793, ILMN_1805344, ILMN_17…	1200	1686	19235	1.21692	0.998735	0.140712	18.4055
GOTERM_MF_FAT	GO:0032553~ribonucleotide binding	140	11.599	0.0649533	ILMN_1771593, ILMN_1814173, ILMN_1665414, ILMN_1793269, ILMN_1704195, ILMN_1763491, ILMN_1772521, ILMN_1778930, ILMN_1740216, ILMN_1692527, ILMN_1699357, ILMN_1808789, ILMN_1673023, ILMN_1689896, ILMN_1748077, ILMN_1664172, ILMN_1676159, ILMN_1747303, ILMN_1760174, ILMN_1782057, ILMN_1706154, ILMN_1728556, ILMN_1802620, ILMN_1811489, ILMN_1651832, ILMN_1651296, ILMN_1789793, ILMN_1805344, ILMN_17…	872	1836	12983	1.13531	1	0.644505	64.6057
GOTERM_MF_FAT	GO:0032555~purine ribonucleotide binding	140	11.599	0.0649533	ILMN_1771593, ILMN_1814173, ILMN_1665414, ILMN_1793269, ILMN_1704195, ILMN_1763491, ILMN_1772521, ILMN_1778930, ILMN_1740216, ILMN_1692527, ILMN_1699357, ILMN_1808789, ILMN_1673023, ILMN_1689896, ILMN_1748077, ILMN_1664172, ILMN_1676159, ILMN_1747303, ILMN_1760174, ILMN_1782057, ILMN_1706154, ILMN_1728556, ILMN_1802620, ILMN_1811489, ILMN_1651832, ILMN_1651296, ILMN_1789793, ILMN_1805344, ILMN_17…	872	1836	12983	1.13531	1	0.644505	64.6057
GOTERM_MF_FAT	GO:0017076~purine nucleotide binding	145	12.0133	0.0712859	ILMN_1771593, ILMN_1814173, ILMN_1665414, ILMN_1793269, ILMN_1704195, ILMN_1763491, ILMN_1772521, ILMN_1778930, ILMN_1740216, ILMN_1692527, ILMN_1699357, ILMN_1808789, ILMN_1673023, ILMN_1689896, ILMN_1748077, ILMN_1664172, ILMN_1676159, ILMN_1747303, ILMN_1760174, ILMN_1782057, ILMN_1706154, ILMN_1728556, ILMN_1657893, ILMN_1802620, ILMN_1811489, ILMN_1651832, ILMN_1651296, ILMN_1789793, ILMN_18…	872	1918	12983	1.12558	1	0.666774	68.1367
Annotation Cluster 27	Enrichment Score: 2.3046385894727646
Category	Term	Count	%	PValue	Genes	List Total	Pop Hits	Pop Total	Fold Enrichment	Bonferroni	Benjamini	FDR
INTERPRO	IPR001878:Zinc finger, CCHC-type	11	0.91135	0.000719289	ILMN_1743456, ILMN_1655137, ILMN_1786852, ILMN_1723007, ILMN_1727617, ILMN_1684038, ILMN_1712560, ILMN_1743104, ILMN_1687922, ILMN_1687981, ILMN_1792825	1081	47	16659	3.60677	0.639261	0.0522487	1.1803
SMART	SM00343:ZnF_C2HC	11	0.91135	0.00249588	ILMN_1743456, ILMN_1655137, ILMN_1786852, ILMN_1723007, ILMN_1727617, ILMN_1684038, ILMN_1712560, ILMN_1743104, ILMN_1687922, ILMN_1687981, ILMN_1792825	696	47	9079	3.05298	0.523935	0.079158	3.27932
UP_SEQ_FEATURE	zinc finger region:CCHC-type	5	0.41425	0.0679138	ILMN_1743456, ILMN_1727617, ILMN_1712560, ILMN_1743104, ILMN_1687922	1199	25	19113	3.18816	1	0.893789	71.8119
Annotation Cluster 28	Enrichment Score: 2.2775733634595654
Category	Term	Count	%	PValue	Genes	List Total	Pop Hits	Pop Total	Fold Enrichment	Bonferroni	Benjamini	FDR
GOTERM_BP_FAT	GO:0006401~RNA catabolic process	14	1.1599	0.000250977	ILMN_1726354, ILMN_1705515, ILMN_1681304, ILMN_1809285, ILMN_1801383, ILMN_1751368, ILMN_1711189, ILMN_1768273, ILMN_1655137, ILMN_1671326, ILMN_1658373, ILMN_1727617, ILMN_1670796, ILMN_1788363, ILMN_1798163	886	65	13528	3.28863	0.493373	0.0187111	0.44585
GOTERM_BP_FAT	GO:0000956~nuclear-transcribed mRNA catabolic process	9	0.74565	0.0015678	ILMN_1711189, ILMN_1671326, ILMN_1658373, ILMN_1705515, ILMN_1670796, ILMN_1681304, ILMN_1801383, ILMN_1809285, ILMN_1788363, ILMN_1798163	886	35	13528	3.92622	0.985743	0.0814967	2.75455
GOTERM_BP_FAT	GO:0006402~mRNA catabolic process	10	0.8285	0.00157852	ILMN_1711189, ILMN_1671326, ILMN_1658373, ILMN_1705515, ILMN_1670796, ILMN_1681304, ILMN_1801383, ILMN_1809285, ILMN_1788363, ILMN_1751368, ILMN_1798163	886	43	13528	3.55084	0.986152	0.080489	2.77313
SP_PIR_KEYWORDS	nonsense-mediated mrna decay	7	0.57995	0.00666835	ILMN_1711189, ILMN_1658373, ILMN_1705515, ILMN_1670796, ILMN_1681304, ILMN_1801383, ILMN_1809285, ILMN_1798163	1200	28	19235	4.00729	0.956336	0.0735282	9.10382
GOTERM_BP_FAT	GO:0000184~nuclear-transcribed mRNA catabolic process, nonsense-mediated decay	7	0.57995	0.0118142	ILMN_1711189, ILMN_1658373, ILMN_1705515, ILMN_1670796, ILMN_1681304, ILMN_1801383, ILMN_1809285, ILMN_1798163	886	30	13528	3.56268	1	0.321515	19.0687
PUBMED_ID	14527413	4	0.3314	0.01376	ILMN_1711189, ILMN_1727617, ILMN_1705515, ILMN_1670796, ILMN_1798163	1207	12	27491	7.5921	1	0.907169	25.9567
PUBMED_ID	12554878	3	0.24855	0.0256374	ILMN_1705515, ILMN_1801383, ILMN_1798163	1207	6	27491	11.3882	1	0.97955	43.0683
PUBMED_ID	12417715	3	0.24855	0.0348601	ILMN_1705515, ILMN_1809285, ILMN_1798163	1207	7	27491	9.76127	1	0.99349	53.68
Annotation Cluster 29	Enrichment Score: 2.2635567099394245
Category	Term	Count	%	PValue	Genes	List Total	Pop Hits	Pop Total	Fold Enrichment	Bonferroni	Benjamini	FDR
SP_PIR_KEYWORDS	protein transport	52	4.3082	0.000179221	ILMN_1810441, ILMN_1692773, ILMN_1740759, ILMN_1793269, ILMN_1669635, ILMN_1723117, ILMN_1788163, ILMN_1669377, ILMN_1670666, ILMN_1815924, ILMN_1784467, ILMN_1796136, ILMN_1738681, ILMN_1695726, ILMN_1789616, ILMN_1708174, ILMN_1760884, ILMN_1799765, ILMN_1751338, ILMN_1762275, ILMN_1679731, ILMN_1761086, ILMN_1683243, ILMN_1735148, ILMN_1679092, ILMN_1802519, ILMN_1812161, ILMN_1745969, ILMN_17…	1200	485	19235	1.71859	0.0804611	0.00299134	0.255381
GOTERM_BP_FAT	GO:0046907~intracellular transport	63	5.21955	0.00221249	ILMN_1692773, ILMN_1686626, ILMN_1737314, ILMN_1661491, ILMN_1694584, ILMN_1705218, ILMN_1746577, ILMN_1716480, ILMN_1723117, ILMN_1747303, ILMN_1788163, ILMN_1669377, ILMN_1781386, ILMN_1815924, ILMN_1695726, ILMN_1750256, ILMN_1651832, ILMN_1789616, ILMN_1722056, ILMN_1659544, ILMN_1708174, ILMN_1760256, ILMN_1764891, ILMN_1751338, ILMN_1712066, ILMN_1784766, ILMN_1802157, ILMN_1762275, ILMN_17…	886	657	13528	1.46411	0.997522	0.105165	3.86634
GOTERM_BP_FAT	GO:0070727~cellular macromolecule localization	43	3.56255	0.00303553	ILMN_1728535, ILMN_1690690, ILMN_1673962, ILMN_1737314, ILMN_1694584, ILMN_1721994, ILMN_1725121, ILMN_1801488, ILMN_1716480, ILMN_1723117, ILMN_1789905, ILMN_1776993, ILMN_1788163, ILMN_1669377, ILMN_1657164, ILMN_1759495, ILMN_1753712, ILMN_1655117, ILMN_1686846, ILMN_1731287, ILMN_1658175, ILMN_1695726, ILMN_1789616, ILMN_1754531, ILMN_1748476, ILMN_1721138, ILMN_1712631, ILMN_1659544, ILMN_17…	886	414	13528	1.58587	0.999735	0.134534	5.26824
GOTERM_BP_FAT	GO:0045184~establishment of protein localization	70	5.7995	0.00444148	ILMN_1692773, ILMN_1810441, ILMN_1740759, ILMN_1737314, ILMN_1694584, ILMN_1793269, ILMN_1669635, ILMN_1716480, ILMN_1723117, ILMN_1788163, ILMN_1669377, ILMN_1670666, ILMN_1815924, ILMN_1784467, ILMN_1796136, ILMN_1738681, ILMN_1695726, ILMN_1789616, ILMN_1659544, ILMN_1708174, ILMN_1760256, ILMN_1760884, ILMN_1799765, ILMN_1751338, ILMN_1712066, ILMN_1784766, ILMN_1679731, ILMN_1762275, ILMN_16…	886	769	13528	1.38986	0.999994	0.166989	7.61853
GOTERM_BP_FAT	GO:0034613~cellular protein localization	42	3.4797	0.00454254	ILMN_1728535, ILMN_1690690, ILMN_1673962, ILMN_1737314, ILMN_1694584, ILMN_1721994, ILMN_1725121, ILMN_1801488, ILMN_1716480, ILMN_1723117, ILMN_1789905, ILMN_1776993, ILMN_1788163, ILMN_1669377, ILMN_1759495, ILMN_1753712, ILMN_1655117, ILMN_1686846, ILMN_1731287, ILMN_1658175, ILMN_1695726, ILMN_1789616, ILMN_1754531, ILMN_1748476, ILMN_1721138, ILMN_1712631, ILMN_1659544, ILMN_1730999, ILMN_17…	886	411	13528	1.5603	0.999996	0.168136	7.78533
GOTERM_BP_FAT	GO:0006886~intracellular protein transport	39	3.23115	0.00455394	ILMN_1728535, ILMN_1690690, ILMN_1673962, ILMN_1737314, ILMN_1694584, ILMN_1721994, ILMN_1725121, ILMN_1716480, ILMN_1723117, ILMN_1669377, ILMN_1788163, ILMN_1776993, ILMN_1759495, ILMN_1753712, ILMN_1655117, ILMN_1686846, ILMN_1731287, ILMN_1658175, ILMN_1695726, ILMN_1789616, ILMN_1754531, ILMN_1748476, ILMN_1721138, ILMN_1712631, ILMN_1659544, ILMN_1730999, ILMN_1708174, ILMN_1760256, ILMN_17…	886	374	13528	1.59218	0.999996	0.166261	7.80413
GOTERM_BP_FAT	GO:0008104~protein localization	78	6.4623	0.00535845	ILMN_1692773, ILMN_1810441, ILMN_1740759, ILMN_1737314, ILMN_1694584, ILMN_1793269, ILMN_1740216, ILMN_1669635, ILMN_1716480, ILMN_1723117, ILMN_1788163, ILMN_1669377, ILMN_1670666, ILMN_1815924, ILMN_1784467, ILMN_1796136, ILMN_1738681, ILMN_1695726, ILMN_1750256, ILMN_1789616, ILMN_1659544, ILMN_1708174, ILMN_1760256, ILMN_1760884, ILMN_1799765, ILMN_1751338, ILMN_1712066, ILMN_1784766, ILMN_16…	886	882	13528	1.35029	1	0.187736	9.12162
GOTERM_BP_FAT	GO:0015031~protein transport	68	5.6338	0.00786759	ILMN_1692773, ILMN_1810441, ILMN_1740759, ILMN_1737314, ILMN_1694584, ILMN_1793269, ILMN_1669635, ILMN_1716480, ILMN_1723117, ILMN_1788163, ILMN_1669377, ILMN_1670666, ILMN_1815924, ILMN_1784467, ILMN_1796136, ILMN_1738681, ILMN_1695726, ILMN_1789616, ILMN_1659544, ILMN_1708174, ILMN_1760256, ILMN_1760884, ILMN_1799765, ILMN_1751338, ILMN_1712066, ILMN_1784766, ILMN_1679731, ILMN_1762275, ILMN_17…	886	762	13528	1.36255	1	0.24262	13.1175
SP_PIR_KEYWORDS	transport	93	7.70505	0.910731	ILMN_1687495, ILMN_1810441, ILMN_1705218, ILMN_1793269, ILMN_1714167, ILMN_1699357, ILMN_1723117, ILMN_1769911, ILMN_1815924, ILMN_1738681, ILMN_1711049, ILMN_1796685, ILMN_1760884, ILMN_1655720, ILMN_1799319, ILMN_1814215, ILMN_1813846, ILMN_1762275, ILMN_1679731, ILMN_1683243, ILMN_1707585, ILMN_1802519, ILMN_1728535, ILMN_1734054, ILMN_1651964, ILMN_1725121, ILMN_1734826, ILMN_1656482, ILMN_18…	1200	1670	19235	0.892642	1	0.999029	100
Annotation Cluster 30	Enrichment Score: 2.163813373631734
Category	Term	Count	%	PValue	Genes	List Total	Pop Hits	Pop Total	Fold Enrichment	Bonferroni	Benjamini	FDR
GOTERM_BP_FAT	GO:0007062~sister chromatid cohesion	6	0.4971	0.000392564	ILMN_1718807, ILMN_1751886, ILMN_1776577, ILMN_1690136, ILMN_1756793, ILMN_1685631	886	11	13528	8.32834	0.654812	0.0262412	0.696547
GOTERM_BP_FAT	GO:0034088~maintenance of mitotic sister chromatid cohesion	3	0.24855	0.0122675	ILMN_1776577, ILMN_1690136, ILMN_1685631	886	3	13528	15.2686	1	0.325235	19.7271
GOTERM_BP_FAT	GO:0034086~maintenance of sister chromatid cohesion	3	0.24855	0.0122675	ILMN_1776577, ILMN_1690136, ILMN_1685631	886	3	13528	15.2686	1	0.325235	19.7271
GOTERM_BP_FAT	GO:0007064~mitotic sister chromatid cohesion	3	0.24855	0.0374388	ILMN_1776577, ILMN_1690136, ILMN_1685631	886	5	13528	9.16117	1	0.609262	49.3021
Annotation Cluster 31	Enrichment Score: 2.1566506545875157
Category	Term	Count	%	PValue	Genes	List Total	Pop Hits	Pop Total	Fold Enrichment	Bonferroni	Benjamini	FDR
GOTERM_BP_FAT	GO:0006366~transcription from RNA polymerase II promoter	27	2.23695	0.00563964	ILMN_1685810, ILMN_1754923, ILMN_1771264, ILMN_1689445, ILMN_1695797, ILMN_1740216, ILMN_1671839, ILMN_1721729, ILMN_1781516, ILMN_1679929, ILMN_1673207, ILMN_1762085, ILMN_1715032, ILMN_1677532, ILMN_1768495, ILMN_1689817, ILMN_1697117, ILMN_1737535, ILMN_1800976, ILMN_1684802, ILMN_1661173, ILMN_1714965, ILMN_1732705, ILMN_1736048, ILMN_1760143, ILMN_1804610, ILMN_1706839, ILMN_1664931	886	234	13528	1.76176	1	0.194095	9.57791
GOTERM_BP_FAT	GO:0032774~RNA biosynthetic process	32	2.6512	0.00639719	ILMN_1685810, ILMN_1754923, ILMN_1771264, ILMN_1689445, ILMN_1695797, ILMN_1740216, ILMN_1746457, ILMN_1727617, ILMN_1671839, ILMN_1721729, ILMN_1781516, ILMN_1679929, ILMN_1673207, ILMN_1762085, ILMN_1715032, ILMN_1677532, ILMN_1768495, ILMN_1689817, ILMN_1697117, ILMN_1737535, ILMN_1800976, ILMN_1684802, ILMN_1723895, ILMN_1661173, ILMN_1713129, ILMN_1714965, ILMN_1732705, ILMN_1736048, ILMN_17…	886	296	13528	1.65066	1	0.209383	10.7964
GOTERM_BP_FAT	GO:0006351~transcription, DNA-dependent	31	2.56835	0.00939307	ILMN_1685810, ILMN_1754923, ILMN_1771264, ILMN_1689445, ILMN_1695797, ILMN_1740216, ILMN_1746457, ILMN_1727617, ILMN_1671839, ILMN_1721729, ILMN_1781516, ILMN_1679929, ILMN_1673207, ILMN_1762085, ILMN_1715032, ILMN_1677532, ILMN_1768495, ILMN_1689817, ILMN_1697117, ILMN_1737535, ILMN_1800976, ILMN_1684802, ILMN_1723895, ILMN_1661173, ILMN_1713129, ILMN_1714965, ILMN_1732705, ILMN_1736048, ILMN_17…	886	292	13528	1.62098	1	0.279472	15.4652
Annotation Cluster 32	Enrichment Score: 2.155171256266249
Category	Term	Count	%	PValue	Genes	List Total	Pop Hits	Pop Total	Fold Enrichment	Bonferroni	Benjamini	FDR
GOTERM_BP_FAT	GO:0032259~methylation	16	1.3256	0.000100615	ILMN_1692026, ILMN_1769473, ILMN_1707175, ILMN_1697919, ILMN_1680129, ILMN_1783606, ILMN_1797813, ILMN_1760201, ILMN_1775743, ILMN_1727508, ILMN_1688638, ILMN_1812208, ILMN_1769606, ILMN_1655635, ILMN_1708105, ILMN_1805481	886	76	13528	3.21445	0.238588	0.0104291	0.178965
SP_PIR_KEYWORDS	methyltransferase	23	1.90555	0.000103469	ILMN_1736080, ILMN_1782257, ILMN_1738342, ILMN_1692026, ILMN_1707175, ILMN_1769473, ILMN_1743784, ILMN_1697919, ILMN_1680129, ILMN_1783606, ILMN_1760201, ILMN_1801378, ILMN_1787511, ILMN_1727508, ILMN_1665331, ILMN_1811933, ILMN_1661264, ILMN_1688070, ILMN_1801178, ILMN_1812208, ILMN_1655635, ILMN_1708105, ILMN_1796113, ILMN_1805481	1200	146	19235	2.52514	0.0472722	0.00186081	0.147512
GOTERM_BP_FAT	GO:0043414~biopolymer methylation	15	1.24275	0.000124726	ILMN_1692026, ILMN_1769473, ILMN_1707175, ILMN_1697919, ILMN_1680129, ILMN_1783606, ILMN_1797813, ILMN_1760201, ILMN_1775743, ILMN_1727508, ILMN_1688638, ILMN_1812208, ILMN_1769606, ILMN_1655635, ILMN_1708105	886	69	13528	3.31927	0.286736	0.0112003	0.221806
GOTERM_BP_FAT	GO:0006730~one-carbon metabolic process	19	1.57415	0.000333274	ILMN_1692026, ILMN_1707175, ILMN_1743784, ILMN_1769473, ILMN_1697919, ILMN_1772521, ILMN_1680129, ILMN_1783606, ILMN_1797813, ILMN_1760201, ILMN_1775743, ILMN_1727508, ILMN_1688638, ILMN_1811933, ILMN_1661264, ILMN_1812208, ILMN_1769606, ILMN_1655635, ILMN_1708105, ILMN_1805481	886	112	13528	2.59021	0.594644	0.0234828	0.59164
GOTERM_BP_FAT	GO:0016571~histone methylation	8	0.6628	0.000357804	ILMN_1692026, ILMN_1769473, ILMN_1707175, ILMN_1697919, ILMN_1783606, ILMN_1812208, ILMN_1797813, ILMN_1708105	886	22	13528	5.55223	0.620713	0.0245516	0.635054
SP_PIR_KEYWORDS	s-adenosyl-l-methionine	17	1.40845	0.000619643	ILMN_1736080, ILMN_1738342, ILMN_1711023, ILMN_1692026, ILMN_1707175, ILMN_1769473, ILMN_1680129, ILMN_1783606, ILMN_1760201, ILMN_1809963, ILMN_1801378, ILMN_1688070, ILMN_1812208, ILMN_1655635, ILMN_1796113, ILMN_1708105, ILMN_1805481	1200	103	19235	2.64559	0.251798	0.00849555	0.880386
GOTERM_BP_FAT	GO:0008213~protein amino acid alkylation	9	0.74565	0.00325013	ILMN_1775743, ILMN_1692026, ILMN_1769473, ILMN_1707175, ILMN_1697919, ILMN_1783606, ILMN_1812208, ILMN_1797813, ILMN_1708105	886	39	13528	3.52353	0.999852	0.138839	5.63061
GOTERM_BP_FAT	GO:0006479~protein amino acid methylation	9	0.74565	0.00325013	ILMN_1775743, ILMN_1692026, ILMN_1769473, ILMN_1707175, ILMN_1697919, ILMN_1783606, ILMN_1812208, ILMN_1797813, ILMN_1708105	886	39	13528	3.52353	0.999852	0.138839	5.63061
GOTERM_MF_FAT	GO:0042054~histone methyltransferase activity	9	0.74565	0.00379151	ILMN_1736080, ILMN_1692026, ILMN_1769473, ILMN_1707175, ILMN_1697919, ILMN_1783606, ILMN_1812208, ILMN_1797813, ILMN_1708105	872	39	12983	3.43587	0.959945	0.130548	5.70554
GOTERM_MF_FAT	GO:0018024~histone-lysine N-methyltransferase activity	8	0.6628	0.00457221	ILMN_1736080, ILMN_1692026, ILMN_1769473, ILMN_1707175, ILMN_1697919, ILMN_1783606, ILMN_1812208, ILMN_1708105	872	32	12983	3.72219	0.979381	0.14933	6.84189
GOTERM_MF_FAT	GO:0016278~lysine N-methyltransferase activity	8	0.6628	0.00457221	ILMN_1736080, ILMN_1692026, ILMN_1769473, ILMN_1707175, ILMN_1697919, ILMN_1783606, ILMN_1812208, ILMN_1708105	872	32	12983	3.72219	0.979381	0.14933	6.84189
GOTERM_MF_FAT	GO:0016279~protein-lysine N-methyltransferase activity	8	0.6628	0.00457221	ILMN_1736080, ILMN_1692026, ILMN_1769473, ILMN_1707175, ILMN_1697919, ILMN_1783606, ILMN_1812208, ILMN_1708105	872	32	12983	3.72219	0.979381	0.14933	6.84189
GOTERM_MF_FAT	GO:0042799~histone methyltransferase activity (H4-K20 specific)	3	0.24855	0.0128859	ILMN_1692026, ILMN_1707175, ILMN_1812208	872	3	12983	14.8888	0.999983	0.283149	18.1742
GOTERM_MF_FAT	GO:0008276~protein methyltransferase activity	9	0.74565	0.017298	ILMN_1736080, ILMN_1692026, ILMN_1769473, ILMN_1707175, ILMN_1697919, ILMN_1783606, ILMN_1812208, ILMN_1797813, ILMN_1708105	872	50	12983	2.67998	1	0.322223	23.6511
UP_SEQ_FEATURE	domain:SET	8	0.6628	0.0320134	ILMN_1736080, ILMN_1692026, ILMN_1769473, ILMN_1707175, ILMN_1697919, ILMN_1783606, ILMN_1812208, ILMN_1708105	1199	49	19113	2.60258	1	0.737053	44.3351
UP_SEQ_FEATURE	domain:AWS	3	0.24855	0.03457	ILMN_1769473, ILMN_1707175, ILMN_1697919	1199	5	19113	9.56447	1	0.754844	46.9235
INTERPRO	IPR006560:AWS	3	0.24855	0.0368164	ILMN_1769473, ILMN_1707175, ILMN_1697919	1081	5	16659	9.24644	1	0.701215	46.1502
INTERPRO	IPR001214:SET	8	0.6628	0.0374279	ILMN_1736080, ILMN_1692026, ILMN_1769473, ILMN_1707175, ILMN_1697919, ILMN_1783606, ILMN_1812208, ILMN_1708105	1081	49	16659	2.51604	1	0.691204	46.7116
KEGG_PATHWAY	hsa00310:Lysine degradation	7	0.57995	0.0456845	ILMN_1736080, ILMN_1692026, ILMN_1769473, ILMN_1707175, ILMN_1697919, ILMN_1812208, ILMN_1784269	306	44	5085	2.64372	0.99941	0.562252	43.1088
SMART	SM00570:AWS	3	0.24855	0.0500863	ILMN_1769473, ILMN_1707175, ILMN_1697919	696	5	9079	7.82672	1	0.53376	49.621
GOTERM_MF_FAT	GO:0008170~N-methyltransferase activity	8	0.6628	0.062475	ILMN_1736080, ILMN_1692026, ILMN_1769473, ILMN_1707175, ILMN_1697919, ILMN_1783606, ILMN_1812208, ILMN_1708105	872	53	12983	2.24736	1	0.636465	63.1268
UP_SEQ_FEATURE	domain:Post-SET	4	0.3314	0.0746392	ILMN_1736080, ILMN_1769473, ILMN_1707175, ILMN_1697919	1199	16	19113	3.9852	1	0.913463	75.2577
SMART	SM00317:SET	8	0.6628	0.0776383	ILMN_1736080, ILMN_1692026, ILMN_1769473, ILMN_1707175, ILMN_1697919, ILMN_1783606, ILMN_1812208, ILMN_1708105	696	49	9079	2.12972	1	0.647817	65.9832
INTERPRO	IPR003616:Post-SET zinc-binding region	4	0.3314	0.0936489	ILMN_1736080, ILMN_1769473, ILMN_1707175, ILMN_1697919	1081	17	16659	3.62605	1	0.913223	80.2598
SMART	SM00508:PostSET	4	0.3314	0.136329	ILMN_1736080, ILMN_1769473, ILMN_1707175, ILMN_1697919	696	17	9079	3.0693	1	0.788729	85.8509
Annotation Cluster 33	Enrichment Score: 2.1476222399698637
Category	Term	Count	%	PValue	Genes	List Total	Pop Hits	Pop Total	Fold Enrichment	Bonferroni	Benjamini	FDR
PUBMED_ID	11230166	58	4.8053	6.21899e-05	ILMN_1665414, ILMN_1696675, ILMN_1680644, ILMN_1777745, ILMN_1682626, ILMN_1748077, ILMN_1778734, ILMN_1738449, ILMN_1773968, ILMN_1728556, ILMN_1680782, ILMN_1678235, ILMN_1738681, ILMN_1661594, ILMN_1765091, ILMN_1658160, ILMN_1789793, ILMN_1760256, ILMN_1671583, ILMN_1690398, ILMN_1779347, ILMN_1750664, ILMN_1807540, ILMN_1695000, ILMN_1801378, ILMN_1781374, ILMN_1687981, ILMN_1686553, ILMN_17…	1207	759	27491	1.74048	0.690755	0.0227494	0.134801
PUBMED_ID	16381901	46	3.8111	0.0118612	ILMN_1686553, ILMN_1736481, ILMN_1665414, ILMN_1791006, ILMN_1696675, ILMN_1654542, ILMN_1814859, ILMN_1777745, ILMN_1813568, ILMN_1748077, ILMN_1682626, ILMN_1778734, ILMN_1694174, ILMN_1723846, ILMN_1803939, ILMN_1732575, ILMN_1732089, ILMN_1754423, ILMN_1686319, ILMN_1680782, ILMN_1678235, ILMN_1764850, ILMN_1738681, ILMN_1801421, ILMN_1656082, ILMN_1652223, ILMN_1747419, ILMN_1657864, ILMN_16…	1207	721	27491	1.45313	1	0.878081	22.8025
PUBMED_ID	15489336	46	3.8111	0.0123707	ILMN_1686553, ILMN_1736481, ILMN_1665414, ILMN_1791006, ILMN_1696675, ILMN_1654542, ILMN_1814859, ILMN_1777745, ILMN_1813568, ILMN_1748077, ILMN_1682626, ILMN_1778734, ILMN_1694174, ILMN_1723846, ILMN_1803939, ILMN_1732575, ILMN_1732089, ILMN_1754423, ILMN_1686319, ILMN_1680782, ILMN_1678235, ILMN_1764850, ILMN_1738681, ILMN_1801421, ILMN_1656082, ILMN_1652223, ILMN_1747419, ILMN_1657864, ILMN_16…	1207	723	27491	1.44911	1	0.884106	23.6612
PUBMED_ID	11076863	48	3.9768	0.0246925	ILMN_1665414, ILMN_1696675, ILMN_1777745, ILMN_1682626, ILMN_1748077, ILMN_1778734, ILMN_1723846, ILMN_1680782, ILMN_1678235, ILMN_1801421, ILMN_1738681, ILMN_1789793, ILMN_1658160, ILMN_1760256, ILMN_1690398, ILMN_1750664, ILMN_1695000, ILMN_1682091, ILMN_1759401, ILMN_1781374, ILMN_1651949, ILMN_1687981, ILMN_1686553, ILMN_1736481, ILMN_1791006, ILMN_1814859, ILMN_1654542, ILMN_1813568, ILMN_16…	1207	795	27491	1.37517	1	0.977741	41.8587
PUBMED_ID	11256614	27	2.23695	0.0811115	ILMN_1686553, ILMN_1665414, ILMN_1814859, ILMN_1654542, ILMN_1748077, ILMN_1694174, ILMN_1723846, ILMN_1803939, ILMN_1707308, ILMN_1686319, ILMN_1754423, ILMN_1732089, ILMN_1678235, ILMN_1738681, ILMN_1789793, ILMN_1658160, ILMN_1671257, ILMN_1760256, ILMN_1799688, ILMN_1690398, ILMN_1750664, ILMN_1704369, ILMN_1695000, ILMN_1688439, ILMN_1698605, ILMN_1759401, ILMN_1781374, ILMN_1783985	1207	442	27491	1.39131	1	0.999954	84.0344
Annotation Cluster 34	Enrichment Score: 2.124792429139167
Category	Term	Count	%	PValue	Genes	List Total	Pop Hits	Pop Total	Fold Enrichment	Bonferroni	Benjamini	FDR
UP_SEQ_FEATURE	repeat:WD 1	32	2.6512	0.00106165	ILMN_1770579, ILMN_1745852, ILMN_1791006, ILMN_1680644, ILMN_1788689, ILMN_1746577, ILMN_1723793, ILMN_1687107, ILMN_1707199, ILMN_1730631, ILMN_1781386, ILMN_1702592, ILMN_1746457, ILMN_1655117, ILMN_1733050, ILMN_1744240, ILMN_1652223, ILMN_1728626, ILMN_1786328, ILMN_1716596, ILMN_1799951, ILMN_1684802, ILMN_1711166, ILMN_1655203, ILMN_1693145, ILMN_1735402, ILMN_1690206, ILMN_1659463, ILMN_16…	1199	274	19113	1.8617	0.958558	0.0747074	1.89431
UP_SEQ_FEATURE	repeat:WD 2	32	2.6512	0.00106165	ILMN_1770579, ILMN_1745852, ILMN_1791006, ILMN_1680644, ILMN_1788689, ILMN_1746577, ILMN_1723793, ILMN_1687107, ILMN_1707199, ILMN_1730631, ILMN_1781386, ILMN_1702592, ILMN_1746457, ILMN_1655117, ILMN_1733050, ILMN_1744240, ILMN_1652223, ILMN_1728626, ILMN_1786328, ILMN_1716596, ILMN_1799951, ILMN_1684802, ILMN_1711166, ILMN_1655203, ILMN_1693145, ILMN_1735402, ILMN_1690206, ILMN_1659463, ILMN_16…	1199	274	19113	1.8617	0.958558	0.0747074	1.89431
SP_PIR_KEYWORDS	wd repeat	32	2.6512	0.00110013	ILMN_1770579, ILMN_1745852, ILMN_1791006, ILMN_1680644, ILMN_1788689, ILMN_1746577, ILMN_1723793, ILMN_1687107, ILMN_1707199, ILMN_1730631, ILMN_1781386, ILMN_1702592, ILMN_1746457, ILMN_1655117, ILMN_1733050, ILMN_1744240, ILMN_1652223, ILMN_1728626, ILMN_1786328, ILMN_1716596, ILMN_1799951, ILMN_1684802, ILMN_1711166, ILMN_1655203, ILMN_1693145, ILMN_1735402, ILMN_1690206, ILMN_1659463, ILMN_16…	1200	276	19235	1.85845	0.402586	0.0142077	1.55809
UP_SEQ_FEATURE	repeat:WD 3	31	2.56835	0.00125567	ILMN_1770579, ILMN_1745852, ILMN_1791006, ILMN_1680644, ILMN_1788689, ILMN_1746577, ILMN_1723793, ILMN_1687107, ILMN_1707199, ILMN_1781386, ILMN_1702592, ILMN_1746457, ILMN_1655117, ILMN_1733050, ILMN_1744240, ILMN_1652223, ILMN_1728626, ILMN_1786328, ILMN_1716596, ILMN_1799951, ILMN_1684802, ILMN_1711166, ILMN_1655203, ILMN_1693145, ILMN_1735402, ILMN_1690206, ILMN_1659463, ILMN_1697440, ILMN_17…	1199	265	19113	1.86477	0.976847	0.0857558	2.23683
INTERPRO	IPR019775:WD40 repeat, conserved site	32	2.6512	0.00211112	ILMN_1770579, ILMN_1745852, ILMN_1791006, ILMN_1680644, ILMN_1788689, ILMN_1746577, ILMN_1723793, ILMN_1687107, ILMN_1707199, ILMN_1730631, ILMN_1781386, ILMN_1702592, ILMN_1746457, ILMN_1655117, ILMN_1733050, ILMN_1744240, ILMN_1652223, ILMN_1728626, ILMN_1786328, ILMN_1716596, ILMN_1799951, ILMN_1684802, ILMN_1711166, ILMN_1655203, ILMN_1693145, ILMN_1735402, ILMN_1690206, ILMN_1659463, ILMN_16…	1081	277	16659	1.7803	0.949944	0.127261	3.42713
INTERPRO	IPR015943:WD40/YVTN repeat-like	33	2.73405	0.0038285	ILMN_1770579, ILMN_1745852, ILMN_1791006, ILMN_1680644, ILMN_1788689, ILMN_1746577, ILMN_1687107, ILMN_1707199, ILMN_1658373, ILMN_1781386, ILMN_1702592, ILMN_1746457, ILMN_1655117, ILMN_1733050, ILMN_1744240, ILMN_1652223, ILMN_1728626, ILMN_1786328, ILMN_1716596, ILMN_1751338, ILMN_1799951, ILMN_1684802, ILMN_1711166, ILMN_1655203, ILMN_1693145, ILMN_1735402, ILMN_1690206, ILMN_1659463, ILMN_16…	1081	300	16659	1.69518	0.99564	0.182342	6.13336
INTERPRO	IPR001680:WD40 repeat	30	2.4855	0.00420509	ILMN_1770579, ILMN_1745852, ILMN_1791006, ILMN_1680644, ILMN_1788689, ILMN_1746577, ILMN_1687107, ILMN_1707199, ILMN_1781386, ILMN_1702592, ILMN_1746457, ILMN_1655117, ILMN_1733050, ILMN_1744240, ILMN_1652223, ILMN_1728626, ILMN_1786328, ILMN_1716596, ILMN_1799951, ILMN_1684802, ILMN_1711166, ILMN_1655203, ILMN_1693145, ILMN_1735402, ILMN_1690206, ILMN_1659463, ILMN_1697440, ILMN_1714283, ILMN_18…	1081	266	16659	1.73805	0.997449	0.192051	6.71719
UP_SEQ_FEATURE	repeat:WD 4	28	2.3198	0.00435953	ILMN_1770579, ILMN_1745852, ILMN_1791006, ILMN_1680644, ILMN_1788689, ILMN_1746577, ILMN_1723793, ILMN_1707199, ILMN_1746457, ILMN_1655117, ILMN_1733050, ILMN_1744240, ILMN_1652223, ILMN_1728626, ILMN_1786328, ILMN_1716596, ILMN_1799951, ILMN_1684802, ILMN_1711166, ILMN_1655203, ILMN_1693145, ILMN_1735402, ILMN_1690206, ILMN_1659463, ILMN_1697440, ILMN_1714283, ILMN_1801869, ILMN_1698185	1199	251	19113	1.77825	0.999998	0.218905	7.56494
INTERPRO	IPR019781:WD40 repeat, subgroup	26	2.1541	0.0143045	ILMN_1770579, ILMN_1745852, ILMN_1791006, ILMN_1788689, ILMN_1746577, ILMN_1687107, ILMN_1707199, ILMN_1746457, ILMN_1733050, ILMN_1744240, ILMN_1652223, ILMN_1728626, ILMN_1786328, ILMN_1716596, ILMN_1799951, ILMN_1684802, ILMN_1711166, ILMN_1655203, ILMN_1693145, ILMN_1735402, ILMN_1690206, ILMN_1659463, ILMN_1697440, ILMN_1714283, ILMN_1801869, ILMN_1698185	1081	242	16659	1.6557	1	0.424076	21.1594
UP_SEQ_FEATURE	repeat:WD 5	24	1.9884	0.0208661	ILMN_1770579, ILMN_1745852, ILMN_1791006, ILMN_1728626, ILMN_1716596, ILMN_1680644, ILMN_1788689, ILMN_1799951, ILMN_1684802, ILMN_1711166, ILMN_1655203, ILMN_1707199, ILMN_1693145, ILMN_1735402, ILMN_1655117, ILMN_1690206, ILMN_1733050, ILMN_1659463, ILMN_1744240, ILMN_1697440, ILMN_1714283, ILMN_1801869, ILMN_1698185, ILMN_1652223	1199	233	19113	1.64197	1	0.621776	31.5909
INTERPRO	IPR017986:WD40 repeat, region	25	2.07125	0.021026	ILMN_1770579, ILMN_1745852, ILMN_1791006, ILMN_1788689, ILMN_1746577, ILMN_1707199, ILMN_1746457, ILMN_1655117, ILMN_1733050, ILMN_1744240, ILMN_1652223, ILMN_1728626, ILMN_1786328, ILMN_1716596, ILMN_1799951, ILMN_1684802, ILMN_1655203, ILMN_1693145, ILMN_1735402, ILMN_1690206, ILMN_1659463, ILMN_1697440, ILMN_1714283, ILMN_1801869, ILMN_1698185	1081	238	16659	1.61877	1	0.528949	29.5769
UP_SEQ_FEATURE	repeat:WD 6	20	1.657	0.0327008	ILMN_1770579, ILMN_1745852, ILMN_1791006, ILMN_1728626, ILMN_1716596, ILMN_1680644, ILMN_1788689, ILMN_1799951, ILMN_1684802, ILMN_1711166, ILMN_1735402, ILMN_1655117, ILMN_1690206, ILMN_1733050, ILMN_1659463, ILMN_1697440, ILMN_1714283, ILMN_1801869, ILMN_1698185, ILMN_1652223	1199	192	19113	1.6605	1	0.739856	45.0425
SMART	SM00320:WD40	30	2.4855	0.0331224	ILMN_1770579, ILMN_1745852, ILMN_1791006, ILMN_1680644, ILMN_1788689, ILMN_1746577, ILMN_1687107, ILMN_1707199, ILMN_1781386, ILMN_1702592, ILMN_1746457, ILMN_1655117, ILMN_1733050, ILMN_1744240, ILMN_1652223, ILMN_1728626, ILMN_1786328, ILMN_1716596, ILMN_1799951, ILMN_1684802, ILMN_1711166, ILMN_1655203, ILMN_1693145, ILMN_1735402, ILMN_1690206, ILMN_1659463, ILMN_1697440, ILMN_1714283, ILMN_18…	696	266	9079	1.47119	0.999955	0.444823	36.2003
INTERPRO	IPR019782:WD40 repeat 2	23	1.90555	0.0370137	ILMN_1770579, ILMN_1745852, ILMN_1791006, ILMN_1728626, ILMN_1786328, ILMN_1716596, ILMN_1788689, ILMN_1746577, ILMN_1799951, ILMN_1684802, ILMN_1655203, ILMN_1707199, ILMN_1693145, ILMN_1735402, ILMN_1746457, ILMN_1690206, ILMN_1733050, ILMN_1659463, ILMN_1697440, ILMN_1714283, ILMN_1801869, ILMN_1698185, ILMN_1652223	1081	226	16659	1.56835	1	0.69506	46.3319
UP_SEQ_FEATURE	repeat:WD 7	13	1.07705	0.231397	ILMN_1770579, ILMN_1745852, ILMN_1791006, ILMN_1728626, ILMN_1788689, ILMN_1799951, ILMN_1690206, ILMN_1733050, ILMN_1659463, ILMN_1697440, ILMN_1801869, ILMN_1698185, ILMN_1652223	1199	150	19113	1.38153	1	0.998359	99.1248
Annotation Cluster 35	Enrichment Score: 2.09512644575339
Category	Term	Count	%	PValue	Genes	List Total	Pop Hits	Pop Total	Fold Enrichment	Bonferroni	Benjamini	FDR
GOTERM_BP_FAT	GO:0000245~spliceosome assembly	8	0.6628	0.00398032	ILMN_1697286, ILMN_1697469, ILMN_1692575, ILMN_1712560, ILMN_1705928, ILMN_1659523, ILMN_1795341, ILMN_1786893	886	32	13528	3.81716	0.99998	0.159923	6.85376
GOTERM_BP_FAT	GO:0022613~ribonucleoprotein complex biogenesis	22	1.8227	0.00706712	ILMN_1697286, ILMN_1797367, ILMN_1748476, ILMN_1799796, ILMN_1671257, ILMN_1726354, ILMN_1799103, ILMN_1712560, ILMN_1711189, ILMN_1727508, ILMN_1697469, ILMN_1812973, ILMN_1729767, ILMN_1692575, ILMN_1756162, ILMN_1670796, ILMN_1770206, ILMN_1705928, ILMN_1721713, ILMN_1795341, ILMN_1778238, ILMN_1659523, ILMN_1786893	886	180	13528	1.86617	1	0.22599	11.8611
GOTERM_BP_FAT	GO:0006376~mRNA splice site selection	5	0.41425	0.0107287	ILMN_1697286, ILMN_1697469, ILMN_1692575, ILMN_1712560, ILMN_1795341	886	14	13528	5.45308	1	0.305987	17.4715
GOTERM_BP_FAT	GO:0022618~ribonucleoprotein complex assembly	11	0.91135	0.013797	ILMN_1697286, ILMN_1697469, ILMN_1799103, ILMN_1729767, ILMN_1692575, ILMN_1712560, ILMN_1705928, ILMN_1770206, ILMN_1659523, ILMN_1795341, ILMN_1786893	886	69	13528	2.43413	1	0.354437	21.9114
Annotation Cluster 36	Enrichment Score: 2.062649580769616
Category	Term	Count	%	PValue	Genes	List Total	Pop Hits	Pop Total	Fold Enrichment	Bonferroni	Benjamini	FDR
UP_SEQ_FEATURE	domain:G-patch	7	0.57995	0.00239886	ILMN_1695000, ILMN_1764617, ILMN_1781906, ILMN_1711270, ILMN_1655625, ILMN_1738239, ILMN_1786893	1199	23	19113	4.85154	0.999252	0.136618	4.2321
INTERPRO	IPR000467:D111/G-patch	6	0.4971	0.0118306	ILMN_1695000, ILMN_1781906, ILMN_1711270, ILMN_1655625, ILMN_1738239, ILMN_1786893	1081	22	16659	4.20293	1	0.400122	17.8301
SMART	SM00443:G_patch	6	0.4971	0.022858	ILMN_1695000, ILMN_1781906, ILMN_1711270, ILMN_1655625, ILMN_1738239, ILMN_1786893	696	22	9079	3.5576	0.998959	0.410381	26.547
Annotation Cluster 37	Enrichment Score: 2.04994371550269
Category	Term	Count	%	PValue	Genes	List Total	Pop Hits	Pop Total	Fold Enrichment	Bonferroni	Benjamini	FDR
PUBMED_ID	9472028	5	0.41425	0.000949098	ILMN_1768930, ILMN_1697469, ILMN_1697670, ILMN_1696407, ILMN_1795341	1207	11	27491	10.3529	1	0.228713	2.03847
PUBMED_ID	8816452	4	0.3314	0.00258063	ILMN_1768930, ILMN_1696407, ILMN_1732053, ILMN_1795341	1207	7	27491	13.015	1	0.44825	5.45037
PUBMED_ID	9447963	4	0.3314	0.00399471	ILMN_1768930, ILMN_1696407, ILMN_1732053, ILMN_1795341	1207	8	27491	11.3882	1	0.576141	8.31553
PUBMED_ID	8261509	3	0.24855	0.010875	ILMN_1696407, ILMN_1732053, ILMN_1795341	1207	4	27491	17.0822	1	0.85725	21.114
UP_SEQ_FEATURE	compositionally biased region:Arg/Ser-rich (RS domain)	5	0.41425	0.0152287	ILMN_1768930, ILMN_1697469, ILMN_1696407, ILMN_1692575, ILMN_1795341	1199	16	19113	4.98149	1	0.5295	24.1413
PUBMED_ID	9237760	3	0.24855	0.0256374	ILMN_1768930, ILMN_1696407, ILMN_1795341	1207	6	27491	11.3882	1	0.97955	43.0683
BIOCARTA	h_smPathway:Spliceosomal Assembly	4	0.3314	0.107623	ILMN_1768930, ILMN_1799103, ILMN_1696407, ILMN_1732053	114	15	1437	3.3614	1	0.766363	74.9317
Annotation Cluster 38	Enrichment Score: 1.8978109711545152
Category	Term	Count	%	PValue	Genes	List Total	Pop Hits	Pop Total	Fold Enrichment	Bonferroni	Benjamini	FDR
PUBMED_ID	9472028	5	0.41425	0.000949098	ILMN_1768930, ILMN_1697469, ILMN_1697670, ILMN_1696407, ILMN_1795341	1207	11	27491	10.3529	1	0.228713	2.03847
UP_SEQ_FEATURE	compositionally biased region:Arg/Ser-rich (RS domain)	5	0.41425	0.0152287	ILMN_1768930, ILMN_1697469, ILMN_1696407, ILMN_1692575, ILMN_1795341	1199	16	19113	4.98149	1	0.5295	24.1413
PUBMED_ID	10757789	3	0.24855	0.0175997	ILMN_1697469, ILMN_1696407, ILMN_1795341	1207	5	27491	13.6658	1	0.942957	31.9638
PUBMED_ID	1577277	3	0.24855	0.0256374	ILMN_1697469, ILMN_1696407, ILMN_1795341	1207	6	27491	11.3882	1	0.97955	43.0683
UP_SEQ_FEATURE	compositionally biased region:Gly-rich (hinge region)	3	0.24855	0.0497269	ILMN_1697469, ILMN_1696407, ILMN_1795341	1199	6	19113	7.97039	1	0.852039	60.0821
Annotation Cluster 39	Enrichment Score: 1.867465964736363
Category	Term	Count	%	PValue	Genes	List Total	Pop Hits	Pop Total	Fold Enrichment	Bonferroni	Benjamini	FDR
GOTERM_CC_FAT	GO:0000775~chromosome, centromeric region	21	1.73985	1.55467e-05	ILMN_1710873, ILMN_1692026, ILMN_1730999, ILMN_1815475, ILMN_1684038, ILMN_1807807, ILMN_1725121, ILMN_1751338, ILMN_1712386, ILMN_1804679, ILMN_1669635, ILMN_1720124, ILMN_1695357, ILMN_1693145, ILMN_1688638, ILMN_1815924, ILMN_1751886, ILMN_1776577, ILMN_1812208, ILMN_1652989, ILMN_1676625	712	124	12782	3.0403	0.00726494	0.000455612	0.0221841
PUBMED_ID	16807356	3	0.24855	0.00560042	ILMN_1815924, ILMN_1652989, ILMN_1669635	1207	3	27491	22.7763	1	0.687966	11.4685
PUBMED_ID	15146057	4	0.3314	0.00579761	ILMN_1815924, ILMN_1751338, ILMN_1652989, ILMN_1669635	1207	9	27491	10.1228	1	0.696588	11.8486
GOTERM_CC_FAT	GO:0000776~kinetochore	11	0.91135	0.0100038	ILMN_1695357, ILMN_1693145, ILMN_1815924, ILMN_1730999, ILMN_1684038, ILMN_1807807, ILMN_1725121, ILMN_1751338, ILMN_1652989, ILMN_1804679, ILMN_1669635	712	77	12782	2.56461	0.991044	0.119657	13.3663
GOTERM_CC_FAT	GO:0031080~Nup107-160 complex	4	0.3314	0.0153241	ILMN_1815924, ILMN_1751338, ILMN_1652989, ILMN_1669635	712	10	12782	7.1809	0.999285	0.173534	19.7786
GOTERM_CC_FAT	GO:0000779~condensed chromosome, centromeric region	9	0.74565	0.0293207	ILMN_1695357, ILMN_1692026, ILMN_1815924, ILMN_1751886, ILMN_1807807, ILMN_1812208, ILMN_1751338, ILMN_1676625, ILMN_1669635	712	66	12782	2.44803	0.999999	0.271819	34.6025
GOTERM_CC_FAT	GO:0000940~outer kinetochore of condensed chromosome	3	0.24855	0.0857788	ILMN_1695357, ILMN_1807807, ILMN_1751338	712	9	12782	5.98408	1	0.52815	72.1919
SP_PIR_KEYWORDS	kinetochore	7	0.57995	0.197856	ILMN_1695357, ILMN_1693145, ILMN_1815924, ILMN_1807807, ILMN_1751338, ILMN_1676625, ILMN_1669635	1200	63	19235	1.78102	1	0.770988	95.6945
GOTERM_CC_FAT	GO:0000777~condensed chromosome kinetochore	5	0.41425	0.404811	ILMN_1695357, ILMN_1815924, ILMN_1807807, ILMN_1751338, ILMN_1669635	712	58	12782	1.54761	1	0.924895	99.9392
Annotation Cluster 40	Enrichment Score: 1.8461713722552853
Category	Term	Count	%	PValue	Genes	List Total	Pop Hits	Pop Total	Fold Enrichment	Bonferroni	Benjamini	FDR
PUBMED_ID	15788387	3	0.24855	0.010875	ILMN_1676010, ILMN_1721081, ILMN_1796208	1207	4	27491	17.0822	1	0.85725	21.114
PIR_SUPERFAMILY	PIRSF037570:transcription factor, Sp1/Sp2/Sp3/Sp4 types	3	0.24855	0.01512	ILMN_1676010, ILMN_1721081, ILMN_1796208	386	4	7396	14.3705	0.998387	0.959832	19.2781
PUBMED_ID	10547281	3	0.24855	0.0175997	ILMN_1676010, ILMN_1721081, ILMN_1796208	1207	5	27491	13.6658	1	0.942957	31.9638
Annotation Cluster 41	Enrichment Score: 1.8353355142800396
Category	Term	Count	%	PValue	Genes	List Total	Pop Hits	Pop Total	Fold Enrichment	Bonferroni	Benjamini	FDR
UP_SEQ_FEATURE	domain:JmjC	10	0.8285	6.23583e-05	ILMN_1794260, ILMN_1697629, ILMN_1668414, ILMN_1764970, ILMN_1755727, ILMN_1764177, ILMN_1687921, ILMN_1706539, ILMN_1661770, ILMN_1654488	1199	30	19113	5.31359	0.170468	0.00665254	0.112215
INTERPRO	IPR003347:Transcription factor jumonji/aspartyl beta-hydroxylase	10	0.8285	0.000107361	ILMN_1794260, ILMN_1697629, ILMN_1668414, ILMN_1764970, ILMN_1755727, ILMN_1764177, ILMN_1687921, ILMN_1706539, ILMN_1661770, ILMN_1654488	1081	31	16659	4.9712	0.141131	0.0108082	0.177009
SMART	SM00558:JmjC	10	0.8285	0.000372119	ILMN_1794260, ILMN_1697629, ILMN_1668414, ILMN_1764970, ILMN_1755727, ILMN_1764177, ILMN_1687921, ILMN_1706539, ILMN_1661770, ILMN_1654488	696	31	9079	4.20792	0.104649	0.0156674	0.495363
INTERPRO	IPR013129:Transcription factor jumonji	8	0.6628	0.000614598	ILMN_1794260, ILMN_1668414, ILMN_1764970, ILMN_1755727, ILMN_1764177, ILMN_1706539, ILMN_1661770, ILMN_1654488	1081	24	16659	5.13691	0.581532	0.0499535	1.00933
UP_SEQ_FEATURE	metal ion-binding site:Iron; catalytic	6	0.4971	0.0178182	ILMN_1794260, ILMN_1680996, ILMN_1668414, ILMN_1764970, ILMN_1706539, ILMN_1661770	1199	25	19113	3.82579	1	0.574836	27.6536
SP_PIR_KEYWORDS	dioxygenase	9	0.74565	0.0519463	ILMN_1794260, ILMN_1680996, ILMN_1668414, ILMN_1764970, ILMN_1755727, ILMN_1731185, ILMN_1706539, ILMN_1661770, ILMN_1654488	1200	66	19235	2.1858	1	0.370177	53.2816
GOTERM_MF_FAT	GO:0016702~oxidoreductase activity, acting on single donors with incorporation of molecular oxygen, incorporation of two atoms of oxygen	9	0.74565	0.0731807	ILMN_1794260, ILMN_1680996, ILMN_1668414, ILMN_1764970, ILMN_1755727, ILMN_1731185, ILMN_1706539, ILMN_1661770, ILMN_1654488	872	66	12983	2.03029	1	0.67038	69.1273
GOTERM_MF_FAT	GO:0016701~oxidoreductase activity, acting on single donors with incorporation of molecular oxygen	9	0.74565	0.078475	ILMN_1794260, ILMN_1680996, ILMN_1668414, ILMN_1764970, ILMN_1755727, ILMN_1731185, ILMN_1706539, ILMN_1661770, ILMN_1654488	872	67	12983	1.99998	1	0.690638	71.7448
SP_PIR_KEYWORDS	iron	25	2.07125	0.0831977	ILMN_1794260, ILMN_1750364, ILMN_1689342, ILMN_1731185, ILMN_1706539, ILMN_1750800, ILMN_1762498, ILMN_1714167, ILMN_1680996, ILMN_1668414, ILMN_1788239, ILMN_1764970, ILMN_1701855, ILMN_1804735, ILMN_1756338, ILMN_1711023, ILMN_1714438, ILMN_1755727, ILMN_1670925, ILMN_1809963, ILMN_1690546, ILMN_1709725, ILMN_1661770, ILMN_1654488, ILMN_1790008	1200	285	19235	1.40607	1	0.503861	71.0394
GOTERM_MF_FAT	GO:0005506~iron ion binding	25	2.07125	0.246899	ILMN_1794260, ILMN_1750364, ILMN_1689342, ILMN_1731185, ILMN_1706539, ILMN_1750800, ILMN_1762498, ILMN_1714167, ILMN_1680996, ILMN_1668414, ILMN_1788239, ILMN_1764970, ILMN_1701855, ILMN_1804735, ILMN_1756338, ILMN_1711023, ILMN_1714438, ILMN_1755727, ILMN_1670925, ILMN_1809963, ILMN_1690546, ILMN_1709725, ILMN_1661770, ILMN_1654488, ILMN_1790008	872	308	12983	1.2085	1	0.928585	98.754
GOTERM_MF_FAT	GO:0016706~oxidoreductase activity, acting on paired donors, with incorporation or reduction of molecular oxygen, 2-oxoglutarate as one donor, and incorporation of one atom each of oxygen into both donors	3	0.24855	0.56912	ILMN_1794260, ILMN_1668414, ILMN_1731185	872	28	12983	1.59522	1	0.994919	99.9998
SP_PIR_KEYWORDS	oxidoreductase	23	1.90555	0.99444	ILMN_1794260, ILMN_1783753, ILMN_1771593, ILMN_1691294, ILMN_1755727, ILMN_1731185, ILMN_1799280, ILMN_1706539, ILMN_1762498, ILMN_1799319, ILMN_1809963, ILMN_1795407, ILMN_1680996, ILMN_1789384, ILMN_1668414, ILMN_1731853, ILMN_1764970, ILMN_1744006, ILMN_1657893, ILMN_1661770, ILMN_1783985, ILMN_1654488, ILMN_1790008	1200	562	19235	0.655998	1	0.999995	100
Annotation Cluster 42	Enrichment Score: 1.7826222758343164
Category	Term	Count	%	PValue	Genes	List Total	Pop Hits	Pop Total	Fold Enrichment	Bonferroni	Benjamini	FDR
GOTERM_BP_FAT	GO:0006913~nucleocytoplasmic transport	26	2.1541	2.66319e-05	ILMN_1686626, ILMN_1673962, ILMN_1737314, ILMN_1725121, ILMN_1801383, ILMN_1746577, ILMN_1723117, ILMN_1747303, ILMN_1759495, ILMN_1815924, ILMN_1694323, ILMN_1652989, ILMN_1789616, ILMN_1797367, ILMN_1748476, ILMN_1730999, ILMN_1705783, ILMN_1760256, ILMN_1764891, ILMN_1754912, ILMN_1751338, ILMN_1784766, ILMN_1802157, ILMN_1685580, ILMN_1734286, ILMN_1762275, ILMN_1762531	886	156	13528	2.54477	0.0696058	0.00313191	0.0473998
GOTERM_BP_FAT	GO:0051169~nuclear transport	26	2.1541	3.32003e-05	ILMN_1686626, ILMN_1673962, ILMN_1737314, ILMN_1725121, ILMN_1801383, ILMN_1746577, ILMN_1723117, ILMN_1747303, ILMN_1759495, ILMN_1815924, ILMN_1694323, ILMN_1652989, ILMN_1789616, ILMN_1797367, ILMN_1748476, ILMN_1730999, ILMN_1705783, ILMN_1760256, ILMN_1764891, ILMN_1754912, ILMN_1751338, ILMN_1784766, ILMN_1802157, ILMN_1685580, ILMN_1734286, ILMN_1762275, ILMN_1762531	886	158	13528	2.51256	0.0860149	0.00374053	0.0590869
GOTERM_BP_FAT	GO:0034504~protein localization in nucleus	12	0.9942	0.0427034	ILMN_1685580, ILMN_1762275, ILMN_1673962, ILMN_1737314, ILMN_1748476, ILMN_1730999, ILMN_1760256, ILMN_1725121, ILMN_1801488, ILMN_1762531, ILMN_1784766, ILMN_1723117	886	94	13528	1.94919	1	0.652013	54.018
GOTERM_BP_FAT	GO:0006606~protein import into nucleus	11	0.91135	0.0536657	ILMN_1685580, ILMN_1762275, ILMN_1673962, ILMN_1737314, ILMN_1748476, ILMN_1730999, ILMN_1760256, ILMN_1725121, ILMN_1762531, ILMN_1784766, ILMN_1723117	886	86	13528	1.95296	1	0.709146	62.5421
GOTERM_BP_FAT	GO:0051170~nuclear import	11	0.91135	0.0609922	ILMN_1685580, ILMN_1762275, ILMN_1673962, ILMN_1737314, ILMN_1748476, ILMN_1730999, ILMN_1760256, ILMN_1725121, ILMN_1762531, ILMN_1784766, ILMN_1723117	886	88	13528	1.90858	1	0.738775	67.3822
GOTERM_BP_FAT	GO:0000059~protein import into nucleus, docking	4	0.3314	0.0956151	ILMN_1762275, ILMN_1673962, ILMN_1725121, ILMN_1723117	886	17	13528	3.59262	1	0.837168	83.2892
GOTERM_BP_FAT	GO:0033365~protein localization in organelle	15	1.24275	0.0965407	ILMN_1673962, ILMN_1737314, ILMN_1748476, ILMN_1721138, ILMN_1730999, ILMN_1760256, ILMN_1725121, ILMN_1801488, ILMN_1784766, ILMN_1789905, ILMN_1723117, ILMN_1685580, ILMN_1762275, ILMN_1762531, ILMN_1745969	886	146	13528	1.56869	1	0.838198	83.5911
GOTERM_BP_FAT	GO:0017038~protein import	12	0.9942	0.238052	ILMN_1685580, ILMN_1762275, ILMN_1673962, ILMN_1737314, ILMN_1721138, ILMN_1748476, ILMN_1730999, ILMN_1760256, ILMN_1725121, ILMN_1762531, ILMN_1784766, ILMN_1723117	886	131	13528	1.39865	1	0.972958	99.2093
GOTERM_BP_FAT	GO:0006605~protein targeting	17	1.40845	0.333053	ILMN_1789616, ILMN_1673962, ILMN_1737314, ILMN_1748476, ILMN_1721138, ILMN_1730999, ILMN_1760256, ILMN_1721994, ILMN_1725121, ILMN_1784766, ILMN_1723117, ILMN_1685580, ILMN_1762275, ILMN_1759495, ILMN_1686846, ILMN_1762531, ILMN_1812161	886	215	13528	1.20729	1	0.989858	99.9261
Annotation Cluster 43	Enrichment Score: 1.719091910613208
Category	Term	Count	%	PValue	Genes	List Total	Pop Hits	Pop Total	Fold Enrichment	Bonferroni	Benjamini	FDR
GOTERM_MF_FAT	GO:0035257~nuclear hormone receptor binding	14	1.1599	0.00170154	ILMN_1777783, ILMN_1707175, ILMN_1696087, ILMN_1795852, ILMN_1718629, ILMN_1695797, ILMN_1666399, ILMN_1780598, ILMN_1754407, ILMN_1764970, ILMN_1781386, ILMN_1721729, ILMN_1748884, ILMN_1738681	872	77	12983	2.70705	0.763648	0.0695824	2.59932
GOTERM_MF_FAT	GO:0051427~hormone receptor binding	14	1.1599	0.00564065	ILMN_1777783, ILMN_1707175, ILMN_1696087, ILMN_1795852, ILMN_1718629, ILMN_1695797, ILMN_1666399, ILMN_1780598, ILMN_1754407, ILMN_1764970, ILMN_1781386, ILMN_1721729, ILMN_1748884, ILMN_1738681	872	88	12983	2.36867	0.991697	0.168293	8.37632
GOTERM_MF_FAT	GO:0030331~estrogen receptor binding	5	0.41425	0.00882054	ILMN_1707175, ILMN_1781386, ILMN_1696087, ILMN_1695797, ILMN_1718629	872	13	12983	5.72645	0.999449	0.221307	12.8044
GOTERM_MF_FAT	GO:0035258~steroid hormone receptor binding	8	0.6628	0.0120898	ILMN_1777783, ILMN_1707175, ILMN_1781386, ILMN_1696087, ILMN_1795852, ILMN_1695797, ILMN_1718629, ILMN_1780598	872	38	12983	3.13448	0.999966	0.275268	17.1477
GOTERM_MF_FAT	GO:0050681~androgen receptor binding	5	0.41425	0.0928406	ILMN_1707175, ILMN_1781386, ILMN_1795852, ILMN_1718629, ILMN_1780598	872	26	12983	2.86322	1	0.730177	77.84
GOTERM_MF_FAT	GO:0046965~retinoid X receptor binding	3	0.24855	0.0961148	ILMN_1707175, ILMN_1695797, ILMN_1718629	872	8	12983	5.58329	1	0.737465	79.0451
GOTERM_MF_FAT	GO:0042974~retinoic acid receptor binding	4	0.3314	0.101331	ILMN_1707175, ILMN_1666399, ILMN_1695797, ILMN_1718629	872	17	12983	3.50324	1	0.751474	80.8391
Annotation Cluster 44	Enrichment Score: 1.6964089802833593
Category	Term	Count	%	PValue	Genes	List Total	Pop Hits	Pop Total	Fold Enrichment	Bonferroni	Benjamini	FDR
PUBMED_ID	11546874	4	0.3314	0.00399471	ILMN_1697670, ILMN_1705783, ILMN_1705515, ILMN_1798163	1207	8	27491	11.3882	1	0.576141	8.31553
PUBMED_ID	12093754	3	0.24855	0.0451486	ILMN_1697670, ILMN_1705783, ILMN_1798163	1207	8	27491	8.54111	1	0.998277	63.2874
PUBMED_ID	9933612	3	0.24855	0.0451486	ILMN_1697670, ILMN_1705783, ILMN_1798163	1207	8	27491	8.54111	1	0.998277	63.2874
Annotation Cluster 45	Enrichment Score: 1.6889490142037027
Category	Term	Count	%	PValue	Genes	List Total	Pop Hits	Pop Total	Fold Enrichment	Bonferroni	Benjamini	FDR
INTERPRO	IPR018359:Bromodomain, conserved site	8	0.6628	0.00750926	ILMN_1814173, ILMN_1815475, ILMN_1682316, ILMN_1788689, ILMN_1758918, ILMN_1730019, ILMN_1692021, ILMN_1720850	1081	36	16659	3.42461	0.999977	0.291455	11.6954
SP_PIR_KEYWORDS	bromodomain	8	0.6628	0.00954428	ILMN_1814173, ILMN_1815475, ILMN_1682316, ILMN_1788689, ILMN_1758918, ILMN_1730019, ILMN_1692021, ILMN_1720850	1200	39	19235	3.28803	0.988759	0.0991136	12.787
INTERPRO	IPR001487:Bromodomain	8	0.6628	0.0133995	ILMN_1814173, ILMN_1815475, ILMN_1682316, ILMN_1788689, ILMN_1758918, ILMN_1730019, ILMN_1692021, ILMN_1720850	1081	40	16659	3.08215	1	0.411974	19.9564
UP_SEQ_FEATURE	domain:Bromo	6	0.4971	0.0282446	ILMN_1814173, ILMN_1815475, ILMN_1682316, ILMN_1730019, ILMN_1692021, ILMN_1720850	1199	28	19113	3.41588	1	0.701624	40.3011
SMART	SM00297:BROMO	8	0.6628	0.0302943	ILMN_1814173, ILMN_1815475, ILMN_1682316, ILMN_1788689, ILMN_1758918, ILMN_1730019, ILMN_1692021, ILMN_1720850	696	40	9079	2.60891	0.999892	0.45616	33.665
INTERPRO	IPR018501:DDT superfamily	3	0.24855	0.0368164	ILMN_1815475, ILMN_1692021, ILMN_1720850	1081	5	16659	9.24644	1	0.701215	46.1502
UP_SEQ_FEATURE	domain:DDT	3	0.24855	0.0497269	ILMN_1815475, ILMN_1692021, ILMN_1720850	1199	6	19113	7.97039	1	0.852039	60.0821
Annotation Cluster 46	Enrichment Score: 1.680601393102697
Category	Term	Count	%	PValue	Genes	List Total	Pop Hits	Pop Total	Fold Enrichment	Bonferroni	Benjamini	FDR
SP_PIR_KEYWORDS	dna replication	17	1.40845	9.61583e-05	ILMN_1771593, ILMN_1754272, ILMN_1767894, ILMN_1659364, ILMN_1784860, ILMN_1758049, ILMN_1763705, ILMN_1725840, ILMN_1681503, ILMN_1748527, ILMN_1694502, ILMN_1689642, ILMN_1781516, ILMN_1776577, ILMN_1724489, ILMN_1806818, ILMN_1778991	1200	88	19235	3.09654	0.0440066	0.00179855	0.137096
PUBMED_ID	9121429	8	0.6628	0.00137865	ILMN_1676010, ILMN_1659364, ILMN_1784860, ILMN_1689445, ILMN_1697117, ILMN_1724489, ILMN_1740216, ILMN_1664931	1207	39	27491	4.67206	1	0.303431	2.94797
PUBMED_ID	12171929	7	0.57995	0.00140282	ILMN_1740976, ILMN_1659364, ILMN_1784860, ILMN_1776577, ILMN_1724489, ILMN_1760201, ILMN_1764285	1207	29	27491	5.49773	1	0.30434	2.99892
PUBMED_ID	12930902	4	0.3314	0.00579761	ILMN_1659364, ILMN_1784860, ILMN_1776577, ILMN_1724489	1207	9	27491	10.1228	1	0.696588	11.8486
PUBMED_ID	12766176	4	0.3314	0.00579761	ILMN_1659364, ILMN_1784860, ILMN_1776577, ILMN_1724489	1207	9	27491	10.1228	1	0.696588	11.8486
GOTERM_CC_FAT	GO:0005657~replication fork	7	0.57995	0.00759263	ILMN_1750079, ILMN_1659364, ILMN_1737314, ILMN_1784860, ILMN_1694502, ILMN_1724489, ILMN_1806818	712	32	12782	3.92705	0.971971	0.0997954	10.306
PUBMED_ID	9822671	4	0.3314	0.00801417	ILMN_1659364, ILMN_1784860, ILMN_1694502, ILMN_1724489	1207	10	27491	9.11052	1	0.780948	16.0144
PUBMED_ID	11572977	3	0.24855	0.010875	ILMN_1659364, ILMN_1784860, ILMN_1724489	1207	4	27491	17.0822	1	0.85725	21.114
PUBMED_ID	7774928	3	0.24855	0.010875	ILMN_1659364, ILMN_1784860, ILMN_1724489	1207	4	27491	17.0822	1	0.85725	21.114
PIR_SUPERFAMILY	PIRSF004274:phage T4 DNA polymerase accessory protein 44	3	0.24855	0.01512	ILMN_1659364, ILMN_1784860, ILMN_1724489	386	4	7396	14.3705	0.998387	0.959832	19.2781
PUBMED_ID	9488738	3	0.24855	0.0175997	ILMN_1659364, ILMN_1784860, ILMN_1724489	1207	5	27491	13.6658	1	0.942957	31.9638
PUBMED_ID	10051561	3	0.24855	0.0175997	ILMN_1659364, ILMN_1784860, ILMN_1724489	1207	5	27491	13.6658	1	0.942957	31.9638
PUBMED_ID	8692848	3	0.24855	0.0175997	ILMN_1659364, ILMN_1784860, ILMN_1724489	1207	5	27491	13.6658	1	0.942957	31.9638
KEGG_PATHWAY	hsa03030:DNA replication	7	0.57995	0.0187655	ILMN_1681503, ILMN_1659364, ILMN_1784860, ILMN_1694502, ILMN_1724489, ILMN_1785198, ILMN_1806818	306	36	5085	3.23121	0.95081	0.452511	20.4273
PUBMED_ID	14605214	3	0.24855	0.0256374	ILMN_1659364, ILMN_1784860, ILMN_1724489	1207	6	27491	11.3882	1	0.97955	43.0683
PUBMED_ID	12192049	3	0.24855	0.0256374	ILMN_1659364, ILMN_1784860, ILMN_1724489	1207	6	27491	11.3882	1	0.97955	43.0683
PUBMED_ID	9228079	3	0.24855	0.0256374	ILMN_1659364, ILMN_1784860, ILMN_1724489	1207	6	27491	11.3882	1	0.97955	43.0683
PUBMED_ID	19237606	9	0.74565	0.0309615	ILMN_1777096, ILMN_1659364, ILMN_1767894, ILMN_1784860, ILMN_1689445, ILMN_1716973, ILMN_1724489, ILMN_1740216, ILMN_1788363	1207	84	27491	2.44032	1	0.989595	49.4475
GOTERM_MF_FAT	GO:0003689~DNA clamp loader activity	3	0.24855	0.0392364	ILMN_1659364, ILMN_1784860, ILMN_1724489	872	5	12983	8.93326	1	0.537227	46.1529
GOTERM_MF_FAT	GO:0033170~protein-DNA loading ATPase activity	3	0.24855	0.0392364	ILMN_1659364, ILMN_1784860, ILMN_1724489	872	5	12983	8.93326	1	0.537227	46.1529
GOTERM_CC_FAT	GO:0005663~DNA replication factor C complex	3	0.24855	0.0399085	ILMN_1659364, ILMN_1784860, ILMN_1724489	712	6	12782	8.97612	1	0.322816	44.0774
PUBMED_ID	11907025	3	0.24855	0.0451486	ILMN_1659364, ILMN_1784860, ILMN_1724489	1207	8	27491	8.54111	1	0.998277	63.2874
KEGG_PATHWAY	hsa03420:Nucleotide excision repair	7	0.57995	0.0456845	ILMN_1763575, ILMN_1659364, ILMN_1784860, ILMN_1695792, ILMN_1724489, ILMN_1740216, ILMN_1785198	306	44	5085	2.64372	0.99941	0.562252	43.1088
PUBMED_ID	12791985	5	0.41425	0.0499779	ILMN_1681503, ILMN_1659364, ILMN_1741801, ILMN_1724489, ILMN_1806818	1207	32	27491	3.5588	1	0.999003	67.1108
GOTERM_MF_FAT	GO:0008094~DNA-dependent ATPase activity	8	0.6628	0.0854845	ILMN_1814173, ILMN_1659364, ILMN_1654583, ILMN_1784860, ILMN_1786016, ILMN_1724489, ILMN_1740216, ILMN_1692021	872	57	12983	2.08965	1	0.710846	74.8919
GOTERM_BP_FAT	GO:0006289~nucleotide-excision repair	7	0.57995	0.148546	ILMN_1763575, ILMN_1812622, ILMN_1659364, ILMN_1784860, ILMN_1724489, ILMN_1740216, ILMN_1732885	886	55	13528	1.94328	1	0.918214	94.2889
PUBMED_ID	9111189	3	0.24855	0.153995	ILMN_1659364, ILMN_1784860, ILMN_1724489	1207	16	27491	4.27056	1	1	97.3408
KEGG_PATHWAY	hsa03430:Mismatch repair	4	0.3314	0.156439	ILMN_1659364, ILMN_1784860, ILMN_1724489, ILMN_1788363	306	23	5085	2.89003	1	0.815591	87.1525
GOTERM_BP_FAT	GO:0006261~DNA-dependent DNA replication	7	0.57995	0.177042	ILMN_1681503, ILMN_1767894, ILMN_1784860, ILMN_1694502, ILMN_1707062, ILMN_1724489, ILMN_1806818	886	58	13528	1.84276	1	0.938754	96.8844
GOTERM_BP_FAT	GO:0006297~nucleotide-excision repair, DNA gap filling	3	0.24855	0.306709	ILMN_1659364, ILMN_1784860, ILMN_1724489	886	17	13528	2.69446	1	0.987367	99.8528
Annotation Cluster 47	Enrichment Score: 1.6541728708815073
Category	Term	Count	%	PValue	Genes	List Total	Pop Hits	Pop Total	Fold Enrichment	Bonferroni	Benjamini	FDR
PUBMED_ID	11564863	6	0.4971	0.00227215	ILMN_1697117, ILMN_1737535, ILMN_1801488, ILMN_1803110, ILMN_1684802, ILMN_1660368	1207	22	27491	6.21172	1	0.419215	4.81408
PUBMED_ID	11406595	5	0.41425	0.00554571	ILMN_1813603, ILMN_1737535, ILMN_1803110, ILMN_1684802, ILMN_1660368	1207	17	27491	6.69891	1	0.688404	11.3628
GOTERM_CC_FAT	GO:0000123~histone acetyltransferase complex	9	0.74565	0.00593631	ILMN_1698441, ILMN_1736015, ILMN_1737535, ILMN_1801488, ILMN_1730019, ILMN_1684802, ILMN_1660368, ILMN_1673023, ILMN_1746276	712	50	12782	3.2314	0.938728	0.0835643	8.14586
PUBMED_ID	12601814	4	0.3314	0.0213282	ILMN_1737535, ILMN_1803110, ILMN_1684802, ILMN_1660368	1207	14	27491	6.50752	1	0.966302	37.3498
PUBMED_ID	10373431	3	0.24855	0.0684861	ILMN_1737535, ILMN_1684802, ILMN_1660368	1207	10	27491	6.83289	1	0.99985	78.5351
GOTERM_CC_FAT	GO:0070461~SAGA-type complex	4	0.3314	0.13316	ILMN_1737535, ILMN_1801488, ILMN_1684802, ILMN_1660368	712	23	12782	3.12213	1	0.64338	86.9881
GOTERM_CC_FAT	GO:0033276~transcription factor TFTC complex	3	0.24855	0.181113	ILMN_1737535, ILMN_1684802, ILMN_1660368	712	14	12782	3.84691	1	0.747941	94.2238
Annotation Cluster 48	Enrichment Score: 1.6455722102556092
Category	Term	Count	%	PValue	Genes	List Total	Pop Hits	Pop Total	Fold Enrichment	Bonferroni	Benjamini	FDR
KEGG_PATHWAY	hsa03018:RNA degradation	14	1.1599	2.24078e-05	ILMN_1669206, ILMN_1799796, ILMN_1726354, ILMN_1798354, ILMN_1795911, ILMN_1809285, ILMN_1711189, ILMN_1727617, ILMN_1756162, ILMN_1670796, ILMN_1680782, ILMN_1701262, ILMN_1756793, ILMN_1772651, ILMN_1721713	306	57	5085	4.08153	0.00355654	0.00177985	0.0270248
PUBMED_ID	12419256	5	0.41425	0.00137437	ILMN_1711189, ILMN_1799796, ILMN_1726354, ILMN_1756162, ILMN_1670796, ILMN_1721713	1207	12	27491	9.49013	1	0.306181	2.93896
PUBMED_ID	11812149	5	0.41425	0.0019166	ILMN_1711189, ILMN_1799796, ILMN_1726354, ILMN_1756162, ILMN_1670796, ILMN_1721713	1207	13	27491	8.76012	1	0.371324	4.07564
GOTERM_CC_FAT	GO:0000178~exosome (RNase complex)	5	0.41425	0.00328094	ILMN_1711189, ILMN_1799796, ILMN_1726354, ILMN_1756162, ILMN_1670796, ILMN_1721713	712	12	12782	7.4801	0.785896	0.0517603	4.58158
SP_PIR_KEYWORDS	exosome	5	0.41425	0.00496258	ILMN_1711189, ILMN_1799796, ILMN_1726354, ILMN_1756162, ILMN_1670796, ILMN_1721713	1200	12	19235	6.67882	0.902536	0.0565451	6.85145
PUBMED_ID	11719186	5	0.41425	0.00554571	ILMN_1711189, ILMN_1799796, ILMN_1726354, ILMN_1756162, ILMN_1670796, ILMN_1721713	1207	17	27491	6.69891	1	0.688404	11.3628
GOTERM_BP_FAT	GO:0022613~ribonucleoprotein complex biogenesis	22	1.8227	0.00706712	ILMN_1697286, ILMN_1797367, ILMN_1748476, ILMN_1799796, ILMN_1671257, ILMN_1726354, ILMN_1799103, ILMN_1712560, ILMN_1711189, ILMN_1727508, ILMN_1697469, ILMN_1812973, ILMN_1729767, ILMN_1692575, ILMN_1756162, ILMN_1670796, ILMN_1770206, ILMN_1705928, ILMN_1721713, ILMN_1795341, ILMN_1778238, ILMN_1659523, ILMN_1786893	886	180	13528	1.86617	1	0.22599	11.8611
GOTERM_MF_FAT	GO:0016896~exoribonuclease activity, producing 5'-phosphomonoesters	5	0.41425	0.00882054	ILMN_1658373, ILMN_1726354, ILMN_1727617, ILMN_1756162, ILMN_1721713	872	13	12983	5.72645	0.999449	0.221307	12.8044
GOTERM_MF_FAT	GO:0004532~exoribonuclease activity	5	0.41425	0.00882054	ILMN_1658373, ILMN_1726354, ILMN_1727617, ILMN_1756162, ILMN_1721713	872	13	12983	5.72645	0.999449	0.221307	12.8044
PUBMED_ID	11110791	4	0.3314	0.01376	ILMN_1711189, ILMN_1799796, ILMN_1726354, ILMN_1670796, ILMN_1721713	1207	12	27491	7.5921	1	0.907169	25.9567
GOTERM_BP_FAT	GO:0034470~ncRNA processing	21	1.73985	0.0204982	ILMN_1686553, ILMN_1711023, ILMN_1748476, ILMN_1799796, ILMN_1671257, ILMN_1726354, ILMN_1680129, ILMN_1660844, ILMN_1679483, ILMN_1768273, ILMN_1711189, ILMN_1655137, ILMN_1746393, ILMN_1727508, ILMN_1812973, ILMN_1729767, ILMN_1756162, ILMN_1670796, ILMN_1770206, ILMN_1721713, ILMN_1778238, ILMN_1805481	886	187	13528	1.71466	1	0.442584	30.8369
GOTERM_BP_FAT	GO:0034660~ncRNA metabolic process	24	1.9884	0.0278452	ILMN_1686553, ILMN_1799796, ILMN_1726354, ILMN_1679483, ILMN_1655137, ILMN_1746393, ILMN_1812973, ILMN_1770206, ILMN_1769606, ILMN_1778238, ILMN_1711023, ILMN_1748476, ILMN_1730999, ILMN_1671257, ILMN_1680129, ILMN_1758214, ILMN_1660844, ILMN_1711189, ILMN_1768273, ILMN_1727508, ILMN_1670796, ILMN_1756162, ILMN_1721713, ILMN_1805481, ILMN_1718963	886	230	13528	1.59325	1	0.520784	39.5126
GOTERM_MF_FAT	GO:0016796~exonuclease activity, active with either ribo- or deoxyribonucleic acids and producing 5'-phosphomonoesters	5	0.41425	0.0411691	ILMN_1658373, ILMN_1726354, ILMN_1727617, ILMN_1756162, ILMN_1721713	872	20	12983	3.72219	1	0.546743	47.8039
GOTERM_MF_FAT	GO:0000175~3'-5'-exoribonuclease activity	4	0.3314	0.0419534	ILMN_1658373, ILMN_1726354, ILMN_1756162, ILMN_1721713	872	12	12983	4.96292	1	0.545775	48.4603
PUBMED_ID	11879549	3	0.24855	0.0451486	ILMN_1711189, ILMN_1726354, ILMN_1670796, ILMN_1721713	1207	8	27491	8.54111	1	0.998277	63.2874
SP_PIR_KEYWORDS	exonuclease	7	0.57995	0.0490955	ILMN_1711189, ILMN_1658373, ILMN_1799796, ILMN_1726354, ILMN_1727617, ILMN_1756162, ILMN_1670796, ILMN_1721713	1200	43	19235	2.6094	1	0.358872	51.2369
INTERPRO	IPR015847:Exoribonuclease, phosphorolytic domain 2	3	0.24855	0.0528822	ILMN_1726354, ILMN_1756162, ILMN_1721713	1081	6	16659	7.70537	1	0.785568	59.2016
PUBMED_ID	17174896	3	0.24855	0.0563917	ILMN_1726354, ILMN_1756162, ILMN_1721713	1207	9	27491	7.5921	1	0.999476	71.6049
GOTERM_MF_FAT	GO:0004527~exonuclease activity	8	0.6628	0.062475	ILMN_1711189, ILMN_1749131, ILMN_1658373, ILMN_1799796, ILMN_1726354, ILMN_1727617, ILMN_1756162, ILMN_1670796, ILMN_1721713	872	53	12983	2.24736	1	0.636465	63.1268
INTERPRO	IPR001247:Exoribonuclease, phosphorolytic domain 1	3	0.24855	0.0709133	ILMN_1726354, ILMN_1756162, ILMN_1721713	1081	7	16659	6.6046	1	0.854865	70.2903
GOTERM_BP_FAT	GO:0006364~rRNA processing	11	0.91135	0.0775112	ILMN_1711189, ILMN_1727508, ILMN_1748476, ILMN_1799796, ILMN_1671257, ILMN_1726354, ILMN_1812973, ILMN_1756162, ILMN_1670796, ILMN_1770206, ILMN_1721713, ILMN_1778238	886	92	13528	1.8256	1	0.792451	76.2188
SP_PIR_KEYWORDS	rrna processing	8	0.6628	0.0841261	ILMN_1711189, ILMN_1727508, ILMN_1799796, ILMN_1671257, ILMN_1726354, ILMN_1756162, ILMN_1670796, ILMN_1721713, ILMN_1778238	1200	61	19235	2.10219	1	0.50195	71.455
GOTERM_BP_FAT	GO:0016072~rRNA metabolic process	11	0.91135	0.0965573	ILMN_1711189, ILMN_1727508, ILMN_1748476, ILMN_1799796, ILMN_1671257, ILMN_1726354, ILMN_1812973, ILMN_1756162, ILMN_1670796, ILMN_1770206, ILMN_1721713, ILMN_1778238	886	96	13528	1.74953	1	0.836302	83.5964
GOTERM_MF_FAT	GO:0008408~3'-5' exonuclease activity	5	0.41425	0.114681	ILMN_1711189, ILMN_1658373, ILMN_1726354, ILMN_1756162, ILMN_1670796, ILMN_1721713	872	28	12983	2.65871	1	0.790533	84.7983
GOTERM_MF_FAT	GO:0004540~ribonuclease activity	8	0.6628	0.152332	ILMN_1768273, ILMN_1658373, ILMN_1746393, ILMN_1799796, ILMN_1726354, ILMN_1727617, ILMN_1756162, ILMN_1721713	872	66	12983	1.8047	1	0.837637	92.2374
GOTERM_BP_FAT	GO:0042254~ribosome biogenesis	12	0.9942	0.174455	ILMN_1748476, ILMN_1797367, ILMN_1799796, ILMN_1726354, ILMN_1671257, ILMN_1711189, ILMN_1727508, ILMN_1812973, ILMN_1670796, ILMN_1756162, ILMN_1721713, ILMN_1770206, ILMN_1778238	886	122	13528	1.50183	1	0.936866	96.7054
GOTERM_MF_FAT	GO:0004518~nuclease activity	15	1.24275	0.174557	ILMN_1678962, ILMN_1749131, ILMN_1714438, ILMN_1799796, ILMN_1726354, ILMN_1711189, ILMN_1768273, ILMN_1658373, ILMN_1746393, ILMN_1708764, ILMN_1727617, ILMN_1670796, ILMN_1756162, ILMN_1721713, ILMN_1780937, ILMN_1732885	872	158	12983	1.41349	1	0.858809	94.853
SP_PIR_KEYWORDS	nuclease	10	0.8285	0.215278	ILMN_1711189, ILMN_1678962, ILMN_1658373, ILMN_1746393, ILMN_1799796, ILMN_1726354, ILMN_1727617, ILMN_1756162, ILMN_1670796, ILMN_1721713, ILMN_1780937	1200	106	19235	1.51219	1	0.793151	96.8525
Annotation Cluster 49	Enrichment Score: 1.6264087518974202
Category	Term	Count	%	PValue	Genes	List Total	Pop Hits	Pop Total	Fold Enrichment	Bonferroni	Benjamini	FDR
PUBMED_ID	12393749	5	0.41425	0.0143257	ILMN_1767422, ILMN_1671839, ILMN_1689445, ILMN_1740216, ILMN_1762725	1207	22	27491	5.17643	1	0.912069	26.8725
PUBMED_ID	9582279	5	0.41425	0.0167522	ILMN_1713129, ILMN_1767422, ILMN_1671839, ILMN_1689445, ILMN_1740216	1207	23	27491	4.95137	1	0.938981	30.6793
PUBMED_ID	12646563	4	0.3314	0.0550283	ILMN_1767422, ILMN_1671839, ILMN_1689445, ILMN_1740216	1207	20	27491	4.55526	1	0.999399	70.7016
Annotation Cluster 50	Enrichment Score: 1.6254793358157975
Category	Term	Count	%	PValue	Genes	List Total	Pop Hits	Pop Total	Fold Enrichment	Bonferroni	Benjamini	FDR
GOTERM_MF_FAT	GO:0016944~RNA polymerase II transcription elongation factor activity	4	0.3314	0.0130554	ILMN_1809890, ILMN_1736048, ILMN_1771264, ILMN_1659339	872	8	12983	7.44438	0.999985	0.272412	18.3912
GOTERM_MF_FAT	GO:0003711~transcription elongation regulator activity	6	0.4971	0.0135722	ILMN_1809890, ILMN_1736048, ILMN_1771264, ILMN_1659339, ILMN_1781516, ILMN_1802157	872	22	12983	4.06057	0.999991	0.274947	19.0496
GOTERM_CC_FAT	GO:0008023~transcription elongation factor complex	4	0.3314	0.0750106	ILMN_1809890, ILMN_1736048, ILMN_1771264, ILMN_1659339	712	18	12782	3.98939	1	0.491968	67.1341
Annotation Cluster 51	Enrichment Score: 1.556151976204011
Category	Term	Count	%	PValue	Genes	List Total	Pop Hits	Pop Total	Fold Enrichment	Bonferroni	Benjamini	FDR
INTERPRO	IPR011029:DEATH-like	11	0.91135	0.0106895	ILMN_1714965, ILMN_1723900, ILMN_1738523, ILMN_1684694, ILMN_1657937, ILMN_1736568, ILMN_1659463, ILMN_1789830, ILMN_1654376, ILMN_1657016, ILMN_1802157	1081	67	16659	2.53012	1	0.37867	16.2502
UP_SEQ_FEATURE	domain:Death	7	0.57995	0.020339	ILMN_1714965, ILMN_1723900, ILMN_1738523, ILMN_1684694, ILMN_1657937, ILMN_1657016, ILMN_1802157	1199	35	19113	3.18816	1	0.61797	30.9247
INTERPRO	IPR000488:Death	7	0.57995	0.0206333	ILMN_1714965, ILMN_1723900, ILMN_1738523, ILMN_1684694, ILMN_1657937, ILMN_1657016, ILMN_1802157	1081	34	16659	3.1728	1	0.531172	29.1093
SMART	SM00005:DEATH	7	0.57995	0.0419516	ILMN_1714965, ILMN_1723900, ILMN_1738523, ILMN_1684694, ILMN_1657937, ILMN_1657016, ILMN_1802157	696	34	9079	2.68564	0.999997	0.506948	43.5503
BIOCARTA	h_nfkbPathway:NF-kB Signaling Pathway	5	0.41425	0.0880308	ILMN_1714965, ILMN_1738523, ILMN_1657937, ILMN_1707308, ILMN_1727142	114	22	1437	2.86483	1	0.751077	67.3617
Annotation Cluster 52	Enrichment Score: 1.4807599066523878
Category	Term	Count	%	PValue	Genes	List Total	Pop Hits	Pop Total	Fold Enrichment	Bonferroni	Benjamini	FDR
PUBMED_ID	12837248	7	0.57995	5.73955e-05	ILMN_1814173, ILMN_1758823, ILMN_1815475, ILMN_1777663, ILMN_1781516, ILMN_1797341, ILMN_1660368	1207	17	27491	9.37848	0.66147	0.0214299	0.124415
BIOCARTA	h_hSWI-SNFpathway:Chromatin Remodeling by hSWI/SNF ATP-dependent Complexes	7	0.57995	0.00125102	ILMN_1814173, ILMN_1758823, ILMN_1726387, ILMN_1697117, ILMN_1740216, ILMN_1762085, ILMN_1797341	114	17	1437	5.1904	0.18763	0.18763	1.50953
PUBMED_ID	11018012	4	0.3314	0.00801417	ILMN_1814173, ILMN_1676010, ILMN_1758823, ILMN_1797341	1207	10	27491	9.11052	1	0.780948	16.0144
PUBMED_ID	12200431	3	0.24855	0.0175997	ILMN_1814173, ILMN_1758823, ILMN_1797341	1207	5	27491	13.6658	1	0.942957	31.9638
PUBMED_ID	18765789	4	0.3314	0.0213282	ILMN_1814173, ILMN_1758823, ILMN_1734380, ILMN_1797341	1207	14	27491	6.50752	1	0.966302	37.3498
PUBMED_ID	8895581	3	0.24855	0.0813355	ILMN_1814173, ILMN_1758823, ILMN_1797341	1207	11	27491	6.21172	1	0.999952	84.1186
PUBMED_ID	11078522	3	0.24855	0.0948506	ILMN_1814173, ILMN_1758823, ILMN_1797341	1207	12	27491	5.69408	1	0.999986	88.4846
PUBMED_ID	11734557	3	0.24855	0.0948506	ILMN_1814173, ILMN_1758823, ILMN_1797341	1207	12	27491	5.69408	1	0.999986	88.4846
GOTERM_CC_FAT	GO:0016585~chromatin remodeling complex	8	0.6628	0.0988743	ILMN_1814173, ILMN_1758823, ILMN_1699496, ILMN_1815475, ILMN_1772455, ILMN_1765076, ILMN_1718629, ILMN_1797341	712	71	12782	2.02279	1	0.562899	77.3665
PUBMED_ID	11784859	3	0.24855	0.108948	ILMN_1814173, ILMN_1758823, ILMN_1797341	1207	13	27491	5.25607	1	0.999997	91.8076
GOTERM_CC_FAT	GO:0070603~SWI/SNF-type complex	3	0.24855	0.201705	ILMN_1814173, ILMN_1758823, ILMN_1797341	712	15	12782	3.59045	1	0.760156	95.984
GOTERM_CC_FAT	GO:0016514~SWI/SNF complex	3	0.24855	0.201705	ILMN_1814173, ILMN_1758823, ILMN_1797341	712	15	12782	3.59045	1	0.760156	95.984
SP_PIR_KEYWORDS	neurogenesis	8	0.6628	0.812015	ILMN_1696339, ILMN_1814173, ILMN_1758823, ILMN_1678618, ILMN_1734380, ILMN_1669425, ILMN_1797341, ILMN_1745994	1200	146	19235	0.878311	1	0.995626	100
Annotation Cluster 53	Enrichment Score: 1.4699905609341055
Category	Term	Count	%	PValue	Genes	List Total	Pop Hits	Pop Total	Fold Enrichment	Bonferroni	Benjamini	FDR
UP_SEQ_FEATURE	domain:MBD	4	0.3314	0.0277292	ILMN_1736080, ILMN_1682091, ILMN_1708764, ILMN_1720850	1199	11	19113	5.79665	1	0.700001	39.7284
INTERPRO	IPR001739:Methyl-CpG DNA binding	4	0.3314	0.0302752	ILMN_1736080, ILMN_1682091, ILMN_1708764, ILMN_1720850	1081	11	16659	5.6039	1	0.636904	39.7874
SMART	SM00391:MBD	4	0.3314	0.0463451	ILMN_1736080, ILMN_1682091, ILMN_1708764, ILMN_1720850	696	11	9079	4.74347	0.999999	0.523731	46.9083
Annotation Cluster 54	Enrichment Score: 1.4547163515425723
Category	Term	Count	%	PValue	Genes	List Total	Pop Hits	Pop Total	Fold Enrichment	Bonferroni	Benjamini	FDR
INTERPRO	IPR013129:Transcription factor jumonji	8	0.6628	0.000614598	ILMN_1794260, ILMN_1668414, ILMN_1764970, ILMN_1755727, ILMN_1764177, ILMN_1706539, ILMN_1661770, ILMN_1654488	1081	24	16659	5.13691	0.581532	0.0499535	1.00933
UP_SEQ_FEATURE	domain:JmjN	3	0.24855	0.105399	ILMN_1755727, ILMN_1764177, ILMN_1661770	1199	9	19113	5.31359	1	0.960866	86.5383
INTERPRO	IPR003349:Transcription factor jumonji, JmjN	3	0.24855	0.133743	ILMN_1755727, ILMN_1764177, ILMN_1661770	1081	10	16659	4.62322	1	0.960414	90.6436
SMART	SM00545:JmjN	3	0.24855	0.17516	ILMN_1755727, ILMN_1764177, ILMN_1661770	696	10	9079	3.91336	1	0.84196	92.3412
Annotation Cluster 55	Enrichment Score: 1.438198275722484
Category	Term	Count	%	PValue	Genes	List Total	Pop Hits	Pop Total	Fold Enrichment	Bonferroni	Benjamini	FDR
UP_SEQ_FEATURE	repeat:SURP motif 1	3	0.24855	0.0216348	ILMN_1697286, ILMN_1692575, ILMN_1711270	1199	4	19113	11.9556	1	0.624079	32.5514
UP_SEQ_FEATURE	repeat:SURP motif 2	3	0.24855	0.0216348	ILMN_1697286, ILMN_1692575, ILMN_1711270	1199	4	19113	11.9556	1	0.624079	32.5514
INTERPRO	IPR000061:SWAP/Surp	3	0.24855	0.0528822	ILMN_1697286, ILMN_1692575, ILMN_1711270	1081	6	16659	7.70537	1	0.785568	59.2016
SMART	SM00648:SWAP	3	0.24855	0.0713823	ILMN_1697286, ILMN_1692575, ILMN_1711270	696	6	9079	6.52227	1	0.632042	62.7726
Annotation Cluster 56	Enrichment Score: 1.4279371422818534
Category	Term	Count	%	PValue	Genes	List Total	Pop Hits	Pop Total	Fold Enrichment	Bonferroni	Benjamini	FDR
PUBMED_ID	9199346	3	0.24855	0.0175997	ILMN_1796710, ILMN_1808047, ILMN_1666399	1207	5	27491	13.6658	1	0.942957	31.9638
PUBMED_ID	12167701	4	0.3314	0.0213282	ILMN_1747419, ILMN_1796710, ILMN_1808047, ILMN_1666399	1207	14	27491	6.50752	1	0.966302	37.3498
PUBMED_ID	15386022	3	0.24855	0.138589	ILMN_1796710, ILMN_1808047, ILMN_1666399	1207	15	27491	4.55526	1	1	96.0669
Annotation Cluster 57	Enrichment Score: 1.4216199509908714
Category	Term	Count	%	PValue	Genes	List Total	Pop Hits	Pop Total	Fold Enrichment	Bonferroni	Benjamini	FDR
UP_SEQ_FEATURE	repeat:ANK 21	5	0.41425	0.00149964	ILMN_1765091, ILMN_1697594, ILMN_1735364, ILMN_1684694, ILMN_1801464, ILMN_1657016	1199	9	19113	8.85599	0.988866	0.0971713	2.6659
UP_SEQ_FEATURE	repeat:ANK 20	5	0.41425	0.00149964	ILMN_1765091, ILMN_1697594, ILMN_1735364, ILMN_1684694, ILMN_1801464, ILMN_1657016	1199	9	19113	8.85599	0.988866	0.0971713	2.6659
UP_SEQ_FEATURE	repeat:ANK 19	5	0.41425	0.00237583	ILMN_1765091, ILMN_1697594, ILMN_1735364, ILMN_1684694, ILMN_1801464, ILMN_1657016	1199	10	19113	7.97039	0.999198	0.138015	4.1923
UP_SEQ_FEATURE	repeat:ANK 18	5	0.41425	0.00237583	ILMN_1765091, ILMN_1697594, ILMN_1735364, ILMN_1684694, ILMN_1801464, ILMN_1657016	1199	10	19113	7.97039	0.999198	0.138015	4.1923
UP_SEQ_FEATURE	repeat:ANK 17	5	0.41425	0.00237583	ILMN_1765091, ILMN_1697594, ILMN_1735364, ILMN_1684694, ILMN_1801464, ILMN_1657016	1199	10	19113	7.97039	0.999198	0.138015	4.1923
UP_SEQ_FEATURE	repeat:ANK 16	5	0.41425	0.0035493	ILMN_1765091, ILMN_1697594, ILMN_1735364, ILMN_1684694, ILMN_1801464, ILMN_1657016	1199	11	19113	7.24581	0.999976	0.18856	6.20118
UP_SEQ_FEATURE	repeat:ANK 15	5	0.41425	0.00695278	ILMN_1765091, ILMN_1697594, ILMN_1735364, ILMN_1684694, ILMN_1801464, ILMN_1657016	1199	13	19113	6.13107	1	0.311609	11.805
UP_SEQ_FEATURE	repeat:ANK 14	5	0.41425	0.00695278	ILMN_1765091, ILMN_1697594, ILMN_1735364, ILMN_1684694, ILMN_1801464, ILMN_1657016	1199	13	19113	6.13107	1	0.311609	11.805
UP_SEQ_FEATURE	repeat:ANK 13	5	0.41425	0.00695278	ILMN_1765091, ILMN_1697594, ILMN_1735364, ILMN_1684694, ILMN_1801464, ILMN_1657016	1199	13	19113	6.13107	1	0.311609	11.805
UP_SEQ_FEATURE	repeat:ANK 22	4	0.3314	0.0108379	ILMN_1765091, ILMN_1697594, ILMN_1684694, ILMN_1657016	1199	8	19113	7.97039	1	0.430546	17.8151
UP_SEQ_FEATURE	repeat:ANK 23	4	0.3314	0.0108379	ILMN_1765091, ILMN_1697594, ILMN_1684694, ILMN_1657016	1199	8	19113	7.97039	1	0.430546	17.8151
UP_SEQ_FEATURE	repeat:ANK 12	5	0.41425	0.0152287	ILMN_1765091, ILMN_1697594, ILMN_1735364, ILMN_1684694, ILMN_1801464, ILMN_1657016	1199	16	19113	4.98149	1	0.5295	24.1413
UP_SEQ_FEATURE	repeat:ANK 11	5	0.41425	0.0524171	ILMN_1765091, ILMN_1697594, ILMN_1735364, ILMN_1684694, ILMN_1801464, ILMN_1657016	1199	23	19113	3.46539	1	0.856886	62.0686
UP_SEQ_FEATURE	repeat:ANK 6	11	0.91135	0.0620004	ILMN_1765091, ILMN_1807969, ILMN_1714965, ILMN_1697594, ILMN_1813669, ILMN_1735364, ILMN_1684694, ILMN_1801464, ILMN_1717313, ILMN_1813568, ILMN_1657016, ILMN_1654385	1199	92	19113	1.90596	1	0.881328	68.4124
UP_SEQ_FEATURE	repeat:ANK 10	5	0.41425	0.0764523	ILMN_1765091, ILMN_1697594, ILMN_1735364, ILMN_1684694, ILMN_1801464, ILMN_1657016	1199	26	19113	3.06554	1	0.914336	76.1161
UP_SEQ_FEATURE	repeat:ANK 4	14	1.1599	0.192129	ILMN_1765091, ILMN_1807969, ILMN_1697594, ILMN_1783675, ILMN_1735364, ILMN_1711828, ILMN_1717313, ILMN_1654385, ILMN_1657016, ILMN_1813568, ILMN_1714965, ILMN_1813669, ILMN_1684694, ILMN_1801464, ILMN_1669259	1199	158	19113	1.41247	1	0.995963	97.8535
UP_SEQ_FEATURE	repeat:ANK 9	5	0.41425	0.199744	ILMN_1765091, ILMN_1697594, ILMN_1735364, ILMN_1684694, ILMN_1801464, ILMN_1657016	1199	37	19113	2.15416	1	0.996345	98.1901
UP_SEQ_FEATURE	repeat:ANK 8	5	0.41425	0.268263	ILMN_1765091, ILMN_1697594, ILMN_1735364, ILMN_1684694, ILMN_1801464, ILMN_1657016	1199	42	19113	1.89771	1	0.999254	99.6388
UP_SEQ_FEATURE	repeat:ANK 7	6	0.4971	0.297846	ILMN_1765091, ILMN_1714965, ILMN_1697594, ILMN_1735364, ILMN_1684694, ILMN_1801464, ILMN_1657016	1199	58	19113	1.64905	1	0.999674	99.8282
UP_SEQ_FEATURE	repeat:ANK 5	11	0.91135	0.306159	ILMN_1765091, ILMN_1807969, ILMN_1714965, ILMN_1697594, ILMN_1813669, ILMN_1735364, ILMN_1684694, ILMN_1801464, ILMN_1717313, ILMN_1813568, ILMN_1657016, ILMN_1654385	1199	131	19113	1.33854	1	0.999735	99.8613
UP_SEQ_FEATURE	repeat:ANK 3	15	1.24275	0.331951	ILMN_1661833, ILMN_1765091, ILMN_1807969, ILMN_1697594, ILMN_1783675, ILMN_1735364, ILMN_1711828, ILMN_1717313, ILMN_1654385, ILMN_1657016, ILMN_1813568, ILMN_1714965, ILMN_1813669, ILMN_1684694, ILMN_1801464, ILMN_1669259	1199	194	19113	1.23253	1	0.999833	99.9299
UP_SEQ_FEATURE	repeat:ANK 1	17	1.40845	0.37656	ILMN_1661833, ILMN_1765091, ILMN_1807969, ILMN_1697594, ILMN_1783675, ILMN_1735364, ILMN_1711828, ILMN_1717313, ILMN_1813568, ILMN_1657016, ILMN_1654385, ILMN_1714965, ILMN_1813669, ILMN_1684694, ILMN_1709771, ILMN_1801464, ILMN_1669259, ILMN_1684271	1199	231	19113	1.17313	1	0.99995	99.9798
UP_SEQ_FEATURE	repeat:ANK 2	17	1.40845	0.383172	ILMN_1661833, ILMN_1765091, ILMN_1807969, ILMN_1697594, ILMN_1783675, ILMN_1735364, ILMN_1711828, ILMN_1717313, ILMN_1813568, ILMN_1657016, ILMN_1654385, ILMN_1714965, ILMN_1813669, ILMN_1684694, ILMN_1709771, ILMN_1801464, ILMN_1669259, ILMN_1684271	1199	232	19113	1.16807	1	0.999954	99.9833
SP_PIR_KEYWORDS	ank repeat	17	1.40845	0.427599	ILMN_1661833, ILMN_1765091, ILMN_1807969, ILMN_1697594, ILMN_1783675, ILMN_1735364, ILMN_1711828, ILMN_1717313, ILMN_1813568, ILMN_1657016, ILMN_1654385, ILMN_1714965, ILMN_1813669, ILMN_1684694, ILMN_1709771, ILMN_1801464, ILMN_1669259, ILMN_1684271	1200	240	19235	1.1354	1	0.926542	99.9651
INTERPRO	IPR002110:Ankyrin	17	1.40845	0.477546	ILMN_1661833, ILMN_1765091, ILMN_1807969, ILMN_1697594, ILMN_1783675, ILMN_1735364, ILMN_1711828, ILMN_1717313, ILMN_1813568, ILMN_1657016, ILMN_1654385, ILMN_1714965, ILMN_1813669, ILMN_1684694, ILMN_1709771, ILMN_1801464, ILMN_1669259, ILMN_1684271	1081	238	16659	1.10077	1	0.9998	99.9978
SMART	SM00248:ANK	17	1.40845	0.743212	ILMN_1661833, ILMN_1765091, ILMN_1807969, ILMN_1697594, ILMN_1783675, ILMN_1735364, ILMN_1711828, ILMN_1717313, ILMN_1813568, ILMN_1657016, ILMN_1654385, ILMN_1714965, ILMN_1813669, ILMN_1684694, ILMN_1709771, ILMN_1801464, ILMN_1669259, ILMN_1684271	696	238	9079	0.931753	1	0.998666	100
Annotation Cluster 58	Enrichment Score: 1.3985135528101496
Category	Term	Count	%	PValue	Genes	List Total	Pop Hits	Pop Total	Fold Enrichment	Bonferroni	Benjamini	FDR
UP_SEQ_FEATURE	domain:TAFH	3	0.24855	0.03457	ILMN_1775637, ILMN_1812795, ILMN_1737535	1199	5	19113	9.56447	1	0.754844	46.9235
INTERPRO	IPR003894:TAFH/NHR1	3	0.24855	0.0368164	ILMN_1775637, ILMN_1812795, ILMN_1737535	1081	5	16659	9.24644	1	0.701215	46.1502
SMART	SM00549:TAFH	3	0.24855	0.0500863	ILMN_1775637, ILMN_1812795, ILMN_1737535	696	5	9079	7.82672	1	0.53376	49.621
Annotation Cluster 59	Enrichment Score: 1.329519006184826
Category	Term	Count	%	PValue	Genes	List Total	Pop Hits	Pop Total	Fold Enrichment	Bonferroni	Benjamini	FDR
GOTERM_MF_FAT	GO:0003724~RNA helicase activity	7	0.57995	0.0112355	ILMN_1716922, ILMN_1805344, ILMN_1686626, ILMN_1814859, ILMN_1756220, ILMN_1735679, ILMN_1764285	872	29	12983	3.59384	0.99993	0.265613	16.0326
GOTERM_MF_FAT	GO:0008186~RNA-dependent ATPase activity	5	0.41425	0.0559529	ILMN_1686626, ILMN_1814859, ILMN_1756220, ILMN_1735679, ILMN_1764285	872	22	12983	3.38381	1	0.622956	58.9538
GOTERM_MF_FAT	GO:0004004~ATP-dependent RNA helicase activity	4	0.3314	0.163316	ILMN_1686626, ILMN_1814859, ILMN_1756220, ILMN_1735679	872	21	12983	2.83595	1	0.852178	93.6555
Annotation Cluster 60	Enrichment Score: 1.3270925589339606
Category	Term	Count	%	PValue	Genes	List Total	Pop Hits	Pop Total	Fold Enrichment	Bonferroni	Benjamini	FDR
KEGG_PATHWAY	hsa04110:Cell cycle	14	1.1599	0.035692	ILMN_1651942, ILMN_1799688, ILMN_1795852, ILMN_1741801, ILMN_1661717, ILMN_1761828, ILMN_1681503, ILMN_1693145, ILMN_1718807, ILMN_1665538, ILMN_1741477, ILMN_1689001, ILMN_1806818, ILMN_1756999	306	125	5085	1.86118	0.996908	0.514389	35.4923
SP_PIR_KEYWORDS	cell cycle control	6	0.4971	0.0410495	ILMN_1651942, ILMN_1665538, ILMN_1795852, ILMN_1689001, ILMN_1756999, ILMN_1778557	1200	31	19235	3.10242	1	0.319304	45.0084
BIOCARTA	h_g1Pathway:Cell Cycle: G1/S Check Point	6	0.4971	0.0712596	ILMN_1772165, ILMN_1661717, ILMN_1665538, ILMN_1795852, ILMN_1689001, ILMN_1741477	114	29	1437	2.60799	0.999995	0.744242	59.2722
Annotation Cluster 61	Enrichment Score: 1.3039798895879486
Category	Term	Count	%	PValue	Genes	List Total	Pop Hits	Pop Total	Fold Enrichment	Bonferroni	Benjamini	FDR
PUBMED_ID	7958925	3	0.24855	0.0256374	ILMN_1661717, ILMN_1761828, ILMN_1741477	1207	6	27491	11.3882	1	0.97955	43.0683
PUBMED_ID	7958924	3	0.24855	0.0256374	ILMN_1661717, ILMN_1761828, ILMN_1741477	1207	6	27491	11.3882	1	0.97955	43.0683
PUBMED_ID	12150994	3	0.24855	0.0348601	ILMN_1661717, ILMN_1761828, ILMN_1741477	1207	7	27491	9.76127	1	0.99349	53.68
KEGG_PATHWAY	hsa04350:TGF-beta signaling pathway	8	0.6628	0.265463	ILMN_1661717, ILMN_1676010, ILMN_1761828, ILMN_1815941, ILMN_1741477, ILMN_1674551, ILMN_1761175, ILMN_1756999	306	87	5085	1.52806	1	0.848427	97.5797
Annotation Cluster 62	Enrichment Score: 1.301441558476811
Category	Term	Count	%	PValue	Genes	List Total	Pop Hits	Pop Total	Fold Enrichment	Bonferroni	Benjamini	FDR
GOTERM_CC_FAT	GO:0005794~Golgi apparatus	62	5.1367	0.0357843	ILMN_1692773, ILMN_1694584, ILMN_1705218, ILMN_1750800, ILMN_1669377, ILMN_1676159, ILMN_1670666, ILMN_1792072, ILMN_1657164, ILMN_1760174, ILMN_1781386, ILMN_1736080, ILMN_1722056, ILMN_1651375, ILMN_1708174, ILMN_1651719, ILMN_1696065, ILMN_1682206, ILMN_1692973, ILMN_1680390, ILMN_1654421, ILMN_1712894, ILMN_1683243, ILMN_1735148, ILMN_1679051, ILMN_1651949, ILMN_1673275, ILMN_1731358, ILMN_17…	712	872	12782	1.27642	1	0.30485	40.5498
GOTERM_CC_FAT	GO:0044431~Golgi apparatus part	25	2.07125	0.0386892	ILMN_1728535, ILMN_1787689, ILMN_1775637, ILMN_1694584, ILMN_1796150, ILMN_1669377, ILMN_1776993, ILMN_1735584, ILMN_1781386, ILMN_1753712, ILMN_1735058, ILMN_1658175, ILMN_1803464, ILMN_1754531, ILMN_1722056, ILMN_1687567, ILMN_1712631, ILMN_1708174, ILMN_1651719, ILMN_1696065, ILMN_1717317, ILMN_1809040, ILMN_1735148, ILMN_1699703, ILMN_1815148, ILMN_1745969	712	294	12782	1.52655	1	0.319912	43.0553
SP_PIR_KEYWORDS	golgi apparatus	46	3.8111	0.0900311	ILMN_1692773, ILMN_1705218, ILMN_1669377, ILMN_1676159, ILMN_1792072, ILMN_1670666, ILMN_1657164, ILMN_1781386, ILMN_1722056, ILMN_1708174, ILMN_1651375, ILMN_1651719, ILMN_1696065, ILMN_1682206, ILMN_1692973, ILMN_1680390, ILMN_1654421, ILMN_1712894, ILMN_1735148, ILMN_1683243, ILMN_1651949, ILMN_1673275, ILMN_1769031, ILMN_1745969, ILMN_1728535, ILMN_1775637, ILMN_1761259, ILMN_1796150, ILMN_17…	1200	588	19235	1.25398	1	0.509412	73.9712
Annotation Cluster 63	Enrichment Score: 1.276270553138651
Category	Term	Count	%	PValue	Genes	List Total	Pop Hits	Pop Total	Fold Enrichment	Bonferroni	Benjamini	FDR
PUBMED_ID	15640446	3	0.24855	0.0175997	ILMN_1755727, ILMN_1795247, ILMN_1797341	1207	5	27491	13.6658	1	0.942957	31.9638
UP_SEQ_FEATURE	domain:ARID	4	0.3314	0.0634997	ILMN_1755727, ILMN_1764177, ILMN_1795247, ILMN_1797341	1199	15	19113	4.25088	1	0.88475	69.3092
INTERPRO	IPR001606:AT-rich interaction region	4	0.3314	0.0688987	ILMN_1755727, ILMN_1764177, ILMN_1795247, ILMN_1797341	1081	15	16659	4.10953	1	0.851712	69.2093
SMART	SM00501:BRIGHT	4	0.3314	0.10196	ILMN_1755727, ILMN_1764177, ILMN_1795247, ILMN_1797341	696	15	9079	3.47854	1	0.707252	76.1852
Annotation Cluster 64	Enrichment Score: 1.2700858230005985
Category	Term	Count	%	PValue	Genes	List Total	Pop Hits	Pop Total	Fold Enrichment	Bonferroni	Benjamini	FDR
PUBMED_ID	11331580	8	0.6628	0.00137865	ILMN_1761858, ILMN_1756657, ILMN_1810441, ILMN_1674260, ILMN_1682316, ILMN_1738704, ILMN_1736562, ILMN_1763433	1207	39	27491	4.67206	1	0.303431	2.94797
INTERPRO	IPR000315:Zinc finger, B-box	10	0.8285	0.0424076	ILMN_1761858, ILMN_1756657, ILMN_1810441, ILMN_1674260, ILMN_1694174, ILMN_1807767, ILMN_1682316, ILMN_1738704, ILMN_1736562, ILMN_1763433	1081	72	16659	2.14038	1	0.721748	51.0826
INTERPRO	IPR003649:B-box, C-terminal	4	0.3314	0.0578135	ILMN_1761858, ILMN_1810441, ILMN_1682316, ILMN_1763433	1081	14	16659	4.40307	1	0.802653	62.5688
SMART	SM00502:BBC	4	0.3314	0.0862718	ILMN_1761858, ILMN_1810441, ILMN_1682316, ILMN_1763433	696	14	9079	3.72701	1	0.672576	69.9946
SMART	SM00336:BBOX	10	0.8285	0.0972663	ILMN_1761858, ILMN_1756657, ILMN_1810441, ILMN_1674260, ILMN_1694174, ILMN_1807767, ILMN_1682316, ILMN_1738704, ILMN_1736562, ILMN_1763433	696	72	9079	1.81174	1	0.703484	74.4699
UP_SEQ_FEATURE	zinc finger region:B box-type 1	3	0.24855	0.17103	ILMN_1761858, ILMN_1682316, ILMN_1763433	1199	12	19113	3.9852	1	0.99309	96.5856
UP_SEQ_FEATURE	zinc finger region:B box-type 2	3	0.24855	0.265197	ILMN_1761858, ILMN_1682316, ILMN_1763433	1199	16	19113	2.9889	1	0.999222	99.6106
Annotation Cluster 65	Enrichment Score: 1.2550851491363797
Category	Term	Count	%	PValue	Genes	List Total	Pop Hits	Pop Total	Fold Enrichment	Bonferroni	Benjamini	FDR
GOTERM_CC_FAT	GO:0005635~nuclear envelope	26	2.1541	0.000181486	ILMN_1673962, ILMN_1700606, ILMN_1734826, ILMN_1725121, ILMN_1746577, ILMN_1669635, ILMN_1723117, ILMN_1680996, ILMN_1815924, ILMN_1694323, ILMN_1784467, ILMN_1801421, ILMN_1652989, ILMN_1738681, ILMN_1772316, ILMN_1789616, ILMN_1658160, ILMN_1756439, ILMN_1730999, ILMN_1705783, ILMN_1754912, ILMN_1751338, ILMN_1746276, ILMN_1726683, ILMN_1762275, ILMN_1680860, ILMN_1754579	712	205	12782	2.27687	0.0816021	0.00404534	0.258683
GOTERM_CC_FAT	GO:0012505~endomembrane system	53	4.39105	0.10016	ILMN_1694584, ILMN_1691291, ILMN_1771411, ILMN_1746577, ILMN_1669635, ILMN_1723117, ILMN_1772156, ILMN_1815924, ILMN_1784467, ILMN_1698406, ILMN_1738681, ILMN_1695726, ILMN_1801421, ILMN_1658160, ILMN_1789616, ILMN_1769751, ILMN_1751338, ILMN_1746276, ILMN_1762275, ILMN_1735148, ILMN_1769031, ILMN_1790008, ILMN_1728535, ILMN_1761259, ILMN_1775637, ILMN_1673962, ILMN_1700606, ILMN_1725121, ILMN_17…	712	782	12782	1.21671	1	0.561748	77.8232
GOTERM_CC_FAT	GO:0031967~organelle envelope	41	3.39685	0.186645	ILMN_1783753, ILMN_1673962, ILMN_1799280, ILMN_1666280, ILMN_1700606, ILMN_1763491, ILMN_1725121, ILMN_1734826, ILMN_1714167, ILMN_1746577, ILMN_1813489, ILMN_1669635, ILMN_1723117, ILMN_1680996, ILMN_1760174, ILMN_1815924, ILMN_1694323, ILMN_1784467, ILMN_1661264, ILMN_1738681, ILMN_1652989, ILMN_1701855, ILMN_1732066, ILMN_1801421, ILMN_1772316, ILMN_1658160, ILMN_1789616, ILMN_1781155, ILMN_17…	712	620	12782	1.18716	1	0.754436	94.7564
GOTERM_CC_FAT	GO:0031975~envelope	41	3.39685	0.192353	ILMN_1783753, ILMN_1673962, ILMN_1799280, ILMN_1666280, ILMN_1700606, ILMN_1763491, ILMN_1725121, ILMN_1734826, ILMN_1714167, ILMN_1746577, ILMN_1813489, ILMN_1669635, ILMN_1723117, ILMN_1680996, ILMN_1760174, ILMN_1815924, ILMN_1694323, ILMN_1784467, ILMN_1661264, ILMN_1738681, ILMN_1652989, ILMN_1701855, ILMN_1732066, ILMN_1801421, ILMN_1772316, ILMN_1658160, ILMN_1789616, ILMN_1781155, ILMN_17…	712	622	12782	1.18335	1	0.751314	95.2578
GOTERM_CC_FAT	GO:0031090~organelle membrane	56	4.6396	0.812682	ILMN_1694584, ILMN_1691291, ILMN_1735364, ILMN_1763491, ILMN_1771411, ILMN_1714167, ILMN_1746577, ILMN_1813489, ILMN_1669635, ILMN_1760174, ILMN_1781386, ILMN_1772156, ILMN_1661264, ILMN_1698406, ILMN_1801464, ILMN_1738681, ILMN_1695726, ILMN_1701855, ILMN_1732066, ILMN_1801421, ILMN_1769751, ILMN_1799319, ILMN_1746276, ILMN_1665066, ILMN_1679731, ILMN_1735148, ILMN_1769031, ILMN_1790008, ILMN_17…	712	1096	12782	0.917268	1	0.996343	100
Annotation Cluster 66	Enrichment Score: 1.2511530077115753
Category	Term	Count	%	PValue	Genes	List Total	Pop Hits	Pop Total	Fold Enrichment	Bonferroni	Benjamini	FDR
GOTERM_BP_FAT	GO:0045941~positive regulation of transcription	51	4.22535	0.0179236	ILMN_1777783, ILMN_1814173, ILMN_1771264, ILMN_1718629, ILMN_1810488, ILMN_1740216, ILMN_1786601, ILMN_1676010, ILMN_1669142, ILMN_1669425, ILMN_1688638, ILMN_1698441, ILMN_1738681, ILMN_1805344, ILMN_1758823, ILMN_1707175, ILMN_1741976, ILMN_1697117, ILMN_1731648, ILMN_1797341, ILMN_1692021, ILMN_1746276, ILMN_1804679, ILMN_1780598, ILMN_1789018, ILMN_1714965, ILMN_1672357, ILMN_1790595, ILMN_17…	886	564	13528	1.38067	1	0.412899	27.5281
GOTERM_BP_FAT	GO:0010628~positive regulation of gene expression	52	4.3082	0.0198846	ILMN_1777783, ILMN_1814173, ILMN_1771264, ILMN_1718629, ILMN_1810488, ILMN_1740216, ILMN_1786601, ILMN_1760201, ILMN_1676010, ILMN_1669142, ILMN_1669425, ILMN_1688638, ILMN_1698441, ILMN_1738681, ILMN_1805344, ILMN_1758823, ILMN_1707175, ILMN_1741976, ILMN_1697117, ILMN_1731648, ILMN_1797341, ILMN_1692021, ILMN_1746276, ILMN_1804679, ILMN_1780598, ILMN_1789018, ILMN_1714965, ILMN_1672357, ILMN_17…	886	581	13528	1.36655	1	0.439447	30.0616
GOTERM_BP_FAT	GO:0045893~positive regulation of transcription, DNA-dependent	42	3.4797	0.044305	ILMN_1777783, ILMN_1814173, ILMN_1685810, ILMN_1771264, ILMN_1718629, ILMN_1695797, ILMN_1810488, ILMN_1740216, ILMN_1688964, ILMN_1786601, ILMN_1745365, ILMN_1789905, ILMN_1676010, ILMN_1669142, ILMN_1669425, ILMN_1688638, ILMN_1721729, ILMN_1681703, ILMN_1803060, ILMN_1679929, ILMN_1778991, ILMN_1793885, ILMN_1758823, ILMN_1707175, ILMN_1795852, ILMN_1674551, ILMN_1731648, ILMN_1800976, ILMN_17…	886	477	13528	1.34441	1	0.659337	55.3684
GOTERM_BP_FAT	GO:0010557~positive regulation of macromolecule biosynthetic process	55	4.55675	0.0459191	ILMN_1777783, ILMN_1814173, ILMN_1771264, ILMN_1718629, ILMN_1810488, ILMN_1740216, ILMN_1786601, ILMN_1676010, ILMN_1669142, ILMN_1669425, ILMN_1688638, ILMN_1698441, ILMN_1738681, ILMN_1805344, ILMN_1758823, ILMN_1707175, ILMN_1741976, ILMN_1697117, ILMN_1731648, ILMN_1797341, ILMN_1706493, ILMN_1692021, ILMN_1746276, ILMN_1804679, ILMN_1780598, ILMN_1789018, ILMN_1714965, ILMN_1672357, ILMN_17…	886	654	13528	1.28406	1	0.666387	56.6915
GOTERM_BP_FAT	GO:0051254~positive regulation of RNA metabolic process	42	3.4797	0.0486702	ILMN_1777783, ILMN_1814173, ILMN_1685810, ILMN_1771264, ILMN_1718629, ILMN_1695797, ILMN_1810488, ILMN_1740216, ILMN_1688964, ILMN_1786601, ILMN_1745365, ILMN_1789905, ILMN_1676010, ILMN_1669142, ILMN_1669425, ILMN_1688638, ILMN_1721729, ILMN_1681703, ILMN_1803060, ILMN_1679929, ILMN_1778991, ILMN_1793885, ILMN_1758823, ILMN_1707175, ILMN_1795852, ILMN_1674551, ILMN_1731648, ILMN_1800976, ILMN_17…	886	481	13528	1.33323	1	0.678845	58.8615
GOTERM_BP_FAT	GO:0045935~positive regulation of nucleobase, nucleoside, nucleotide and nucleic acid metabolic process	52	4.3082	0.0588138	ILMN_1777783, ILMN_1814173, ILMN_1771264, ILMN_1718629, ILMN_1810488, ILMN_1740216, ILMN_1786601, ILMN_1676010, ILMN_1669142, ILMN_1669425, ILMN_1688638, ILMN_1698441, ILMN_1738681, ILMN_1805344, ILMN_1758823, ILMN_1707175, ILMN_1741976, ILMN_1697117, ILMN_1731648, ILMN_1691188, ILMN_1797341, ILMN_1692021, ILMN_1746276, ILMN_1804679, ILMN_1780598, ILMN_1789018, ILMN_1714965, ILMN_1672357, ILMN_17…	886	624	13528	1.27239	1	0.733992	66.0086
GOTERM_BP_FAT	GO:0031328~positive regulation of cellular biosynthetic process	56	4.6396	0.0649076	ILMN_1777783, ILMN_1814173, ILMN_1771264, ILMN_1718629, ILMN_1810488, ILMN_1740216, ILMN_1786601, ILMN_1676010, ILMN_1669142, ILMN_1669425, ILMN_1688638, ILMN_1698441, ILMN_1738681, ILMN_1805344, ILMN_1758823, ILMN_1707175, ILMN_1741976, ILMN_1697117, ILMN_1731648, ILMN_1797341, ILMN_1706493, ILMN_1692021, ILMN_1746276, ILMN_1804679, ILMN_1780598, ILMN_1813846, ILMN_1789018, ILMN_1714965, ILMN_16…	886	685	13528	1.24824	1	0.755688	69.7204
GOTERM_BP_FAT	GO:0051173~positive regulation of nitrogen compound metabolic process	53	4.39105	0.0686764	ILMN_1777783, ILMN_1814173, ILMN_1771264, ILMN_1718629, ILMN_1810488, ILMN_1740216, ILMN_1786601, ILMN_1676010, ILMN_1669142, ILMN_1669425, ILMN_1688638, ILMN_1698441, ILMN_1738681, ILMN_1805344, ILMN_1758823, ILMN_1707175, ILMN_1741976, ILMN_1697117, ILMN_1731648, ILMN_1691188, ILMN_1797341, ILMN_1692021, ILMN_1746276, ILMN_1804679, ILMN_1780598, ILMN_1813846, ILMN_1789018, ILMN_1714965, ILMN_16…	886	644	13528	1.25658	1	0.767801	71.821
GOTERM_BP_FAT	GO:0009891~positive regulation of biosynthetic process	56	4.6396	0.0818088	ILMN_1777783, ILMN_1814173, ILMN_1771264, ILMN_1718629, ILMN_1810488, ILMN_1740216, ILMN_1786601, ILMN_1676010, ILMN_1669142, ILMN_1669425, ILMN_1688638, ILMN_1698441, ILMN_1738681, ILMN_1805344, ILMN_1758823, ILMN_1707175, ILMN_1741976, ILMN_1697117, ILMN_1731648, ILMN_1797341, ILMN_1706493, ILMN_1692021, ILMN_1746276, ILMN_1804679, ILMN_1780598, ILMN_1813846, ILMN_1789018, ILMN_1714965, ILMN_16…	886	695	13528	1.23028	1	0.805982	78.1157
GOTERM_BP_FAT	GO:0010604~positive regulation of macromolecule metabolic process	67	5.55095	0.0946819	ILMN_1777783, ILMN_1814173, ILMN_1771264, ILMN_1718629, ILMN_1760542, ILMN_1810488, ILMN_1740216, ILMN_1760201, ILMN_1786601, ILMN_1671696, ILMN_1669142, ILMN_1676010, ILMN_1669425, ILMN_1688638, ILMN_1698441, ILMN_1738681, ILMN_1758823, ILMN_1805344, ILMN_1707175, ILMN_1741976, ILMN_1697117, ILMN_1691188, ILMN_1731648, ILMN_1797341, ILMN_1675497, ILMN_1706493, ILMN_1804679, ILMN_1692021, ILMN_17…	886	857	13528	1.1937	1	0.836094	82.9796
GOTERM_BP_FAT	GO:0045944~positive regulation of transcription from RNA polymerase II promoter	29	2.40265	0.241	ILMN_1814173, ILMN_1777783, ILMN_1685810, ILMN_1771264, ILMN_1718629, ILMN_1695797, ILMN_1688964, ILMN_1740216, ILMN_1786601, ILMN_1745365, ILMN_1789905, ILMN_1676010, ILMN_1669425, ILMN_1721729, ILMN_1681703, ILMN_1679929, ILMN_1803060, ILMN_1778991, ILMN_1793885, ILMN_1758823, ILMN_1674551, ILMN_1800976, ILMN_1784217, ILMN_1746276, ILMN_1713129, ILMN_1714965, ILMN_1790595, ILMN_1788107, ILMN_17…	886	371	13528	1.1935	1	0.971963	99.262
Annotation Cluster 67	Enrichment Score: 1.244896555292003
Category	Term	Count	%	PValue	Genes	List Total	Pop Hits	Pop Total	Fold Enrichment	Bonferroni	Benjamini	FDR
PUBMED_ID	9121429	8	0.6628	0.00137865	ILMN_1676010, ILMN_1659364, ILMN_1784860, ILMN_1689445, ILMN_1697117, ILMN_1724489, ILMN_1740216, ILMN_1664931	1207	39	27491	4.67206	1	0.303431	2.94797
PUBMED_ID	11564863	6	0.4971	0.00227215	ILMN_1697117, ILMN_1737535, ILMN_1801488, ILMN_1803110, ILMN_1684802, ILMN_1660368	1207	22	27491	6.21172	1	0.419215	4.81408
GOTERM_CC_FAT	GO:0016591~DNA-directed RNA polymerase II, holoenzyme	12	0.9942	0.00504671	ILMN_1686553, ILMN_1809890, ILMN_1659339, ILMN_1689445, ILMN_1697117, ILMN_1737535, ILMN_1740216, ILMN_1664931, ILMN_1684802, ILMN_1660844, ILMN_1660368, ILMN_1679483	712	81	12782	2.65959	0.90679	0.0760494	6.96579
PUBMED_ID	9153318	4	0.3314	0.0106636	ILMN_1697117, ILMN_1737535, ILMN_1810488, ILMN_1684802	1207	11	27491	8.28229	1	0.854385	20.7475
GOTERM_BP_FAT	GO:0006368~RNA elongation from RNA polymerase II promoter	9	0.74565	0.0118728	ILMN_1736048, ILMN_1771264, ILMN_1760143, ILMN_1689445, ILMN_1697117, ILMN_1737535, ILMN_1740216, ILMN_1664931, ILMN_1684802	886	48	13528	2.86287	1	0.319677	19.1541
GOTERM_BP_FAT	GO:0006354~RNA elongation	9	0.74565	0.0168759	ILMN_1736048, ILMN_1771264, ILMN_1760143, ILMN_1689445, ILMN_1697117, ILMN_1737535, ILMN_1740216, ILMN_1664931, ILMN_1684802	886	51	13528	2.69446	1	0.400884	26.1394
PUBMED_ID	14580349	4	0.3314	0.017313	ILMN_1676010, ILMN_1697117, ILMN_1737535, ILMN_1684802	1207	13	27491	7.00809	1	0.941642	31.5318
PUBMED_ID	9054383	6	0.4971	0.0243362	ILMN_1689445, ILMN_1697117, ILMN_1737535, ILMN_1740216, ILMN_1664931, ILMN_1684802	1207	38	27491	3.59626	1	0.977175	41.3963
PUBMED_ID	8849451	6	0.4971	0.0462165	ILMN_1676010, ILMN_1689445, ILMN_1737535, ILMN_1740216, ILMN_1664931, ILMN_1684802	1207	45	27491	3.03684	1	0.998452	64.1677
PUBMED_ID	7926747	3	0.24855	0.0563917	ILMN_1697117, ILMN_1740216, ILMN_1664931	1207	9	27491	7.5921	1	0.999476	71.6049
GOTERM_BP_FAT	GO:0006367~transcription initiation from RNA polymerase II promoter	9	0.74565	0.0749859	ILMN_1754923, ILMN_1689445, ILMN_1697117, ILMN_1721729, ILMN_1737535, ILMN_1695797, ILMN_1740216, ILMN_1664931, ILMN_1684802	886	68	13528	2.02085	1	0.78349	75.0328
PUBMED_ID	8946909	5	0.41425	0.0837709	ILMN_1689445, ILMN_1697117, ILMN_1740216, ILMN_1664931, ILMN_1684802	1207	38	27491	2.99688	1	0.999963	85.0072
PUBMED_ID	1939271	5	0.41425	0.0837709	ILMN_1689445, ILMN_1697117, ILMN_1740216, ILMN_1664931, ILMN_1684802	1207	38	27491	2.99688	1	0.999963	85.0072
PUBMED_ID	2449431	5	0.41425	0.0837709	ILMN_1689445, ILMN_1697117, ILMN_1740216, ILMN_1664931, ILMN_1684802	1207	38	27491	2.99688	1	0.999963	85.0072
PUBMED_ID	9405375	5	0.41425	0.0837709	ILMN_1689445, ILMN_1697117, ILMN_1740216, ILMN_1664931, ILMN_1684802	1207	38	27491	2.99688	1	0.999963	85.0072
GOTERM_BP_FAT	GO:0006352~transcription initiation	10	0.8285	0.0919581	ILMN_1713129, ILMN_1754923, ILMN_1689445, ILMN_1697117, ILMN_1721729, ILMN_1737535, ILMN_1695797, ILMN_1740216, ILMN_1664931, ILMN_1684802	886	83	13528	1.83959	1	0.830975	82.0445
PUBMED_ID	8121496	3	0.24855	0.138589	ILMN_1697117, ILMN_1737535, ILMN_1684802	1207	15	27491	4.55526	1	1	96.0669
PUBMED_ID	7835343	3	0.24855	0.138589	ILMN_1697117, ILMN_1737535, ILMN_1684802	1207	15	27491	4.55526	1	1	96.0669
PUBMED_ID	8680883	3	0.24855	0.138589	ILMN_1697117, ILMN_1737535, ILMN_1684802	1207	15	27491	4.55526	1	1	96.0669
PUBMED_ID	8764009	3	0.24855	0.138589	ILMN_1697117, ILMN_1737535, ILMN_1684802	1207	15	27491	4.55526	1	1	96.0669
PUBMED_ID	7933101	3	0.24855	0.169708	ILMN_1697117, ILMN_1737535, ILMN_1684802	1207	17	27491	4.01935	1	1	98.2293
PUBMED_ID	8764062	3	0.24855	0.169708	ILMN_1697117, ILMN_1737535, ILMN_1684802	1207	17	27491	4.01935	1	1	98.2293
PUBMED_ID	9765201	4	0.3314	0.174907	ILMN_1736048, ILMN_1689445, ILMN_1697117, ILMN_1740216	1207	33	27491	2.76076	1	1	98.4548
PUBMED_ID	10066804	3	0.24855	0.284059	ILMN_1689445, ILMN_1697117, ILMN_1740216	1207	24	27491	2.84704	1	1	99.9288
PUBMED_ID	8934526	3	0.24855	0.300527	ILMN_1689445, ILMN_1740216, ILMN_1664931	1207	25	27491	2.73316	1	1	99.957
GOTERM_CC_FAT	GO:0005669~transcription factor TFIID complex	3	0.24855	0.348248	ILMN_1697117, ILMN_1737535, ILMN_1684802	712	22	12782	2.44803	1	0.895221	99.7778
KEGG_PATHWAY	hsa03022:Basal transcription factors	4	0.3314	0.35098	ILMN_1697117, ILMN_1737535, ILMN_1664931, ILMN_1684802	306	35	5085	1.89916	1	0.89109	99.4562
Annotation Cluster 68	Enrichment Score: 1.229150363112215
Category	Term	Count	%	PValue	Genes	List Total	Pop Hits	Pop Total	Fold Enrichment	Bonferroni	Benjamini	FDR
PUBMED_ID	11331580	8	0.6628	0.00137865	ILMN_1761858, ILMN_1756657, ILMN_1810441, ILMN_1674260, ILMN_1682316, ILMN_1738704, ILMN_1736562, ILMN_1763433	1207	39	27491	4.67206	1	0.303431	2.94797
INTERPRO	IPR018355:SPla/RYanodine receptor subgroup	9	0.74565	0.024544	ILMN_1761858, ILMN_1756657, ILMN_1694174, ILMN_1738704, ILMN_1736562, ILMN_1667306, ILMN_1718571, ILMN_1752758, ILMN_1792070	1081	55	16659	2.52176	1	0.567598	33.6384
UP_SEQ_FEATURE	domain:B30.2/SPRY	11	0.91135	0.0319399	ILMN_1761858, ILMN_1756657, ILMN_1694174, ILMN_1738704, ILMN_1736562, ILMN_1667306, ILMN_1718571, ILMN_1682864, ILMN_1763433, ILMN_1752758, ILMN_1792070	1199	82	19113	2.1384	1	0.741069	44.2589
INTERPRO	IPR000315:Zinc finger, B-box	10	0.8285	0.0424076	ILMN_1761858, ILMN_1756657, ILMN_1810441, ILMN_1674260, ILMN_1694174, ILMN_1807767, ILMN_1682316, ILMN_1738704, ILMN_1736562, ILMN_1763433	1081	72	16659	2.14038	1	0.721748	51.0826
INTERPRO	IPR003877:SPla/RYanodine receptor SPRY	11	0.91135	0.044704	ILMN_1761858, ILMN_1756657, ILMN_1694174, ILMN_1738704, ILMN_1736562, ILMN_1667306, ILMN_1718571, ILMN_1682864, ILMN_1763433, ILMN_1752758, ILMN_1792070	1081	84	16659	2.01807	1	0.733546	52.9827
INTERPRO	IPR001870:B302 (SPRY)-like	11	0.91135	0.0545891	ILMN_1761858, ILMN_1756657, ILMN_1694174, ILMN_1738704, ILMN_1736562, ILMN_1667306, ILMN_1718571, ILMN_1682864, ILMN_1763433, ILMN_1752758, ILMN_1792070	1081	87	16659	1.94848	1	0.789799	60.398
SMART	SM00449:SPRY	9	0.74565	0.0564617	ILMN_1761858, ILMN_1756657, ILMN_1694174, ILMN_1738704, ILMN_1736562, ILMN_1667306, ILMN_1718571, ILMN_1752758, ILMN_1792070	696	55	9079	2.13456	1	0.56043	53.9501
INTERPRO	IPR006574:SPRY-associated	7	0.57995	0.0883956	ILMN_1761858, ILMN_1756657, ILMN_1694174, ILMN_1738704, ILMN_1736562, ILMN_1752758, ILMN_1792070	1081	48	16659	2.2474	1	0.907856	78.2846
SMART	SM00336:BBOX	10	0.8285	0.0972663	ILMN_1761858, ILMN_1756657, ILMN_1810441, ILMN_1674260, ILMN_1694174, ILMN_1807767, ILMN_1682316, ILMN_1738704, ILMN_1736562, ILMN_1763433	696	72	9079	1.81174	1	0.703484	74.4699
SMART	SM00589:PRY	7	0.57995	0.158074	ILMN_1761858, ILMN_1756657, ILMN_1694174, ILMN_1738704, ILMN_1736562, ILMN_1752758, ILMN_1792070	696	48	9079	1.90233	1	0.828328	89.9315
INTERPRO	IPR003879:Butyrophylin-like	7	0.57995	0.212298	ILMN_1761858, ILMN_1756657, ILMN_1694174, ILMN_1738704, ILMN_1736562, ILMN_1752758, ILMN_1792070	1081	62	16659	1.73992	1	0.990266	98.0507
PIR_SUPERFAMILY	PIRSF001733:tripartite motif-containing protein	3	0.24855	0.220702	ILMN_1756657, ILMN_1738704, ILMN_1736562	386	17	7396	3.38129	1	1	96.9959
UP_SEQ_FEATURE	zinc finger region:B box-type	6	0.4971	0.261011	ILMN_1756657, ILMN_1810441, ILMN_1674260, ILMN_1694174, ILMN_1738704, ILMN_1736562	1199	55	19113	1.73899	1	0.99916	99.5686
Annotation Cluster 69	Enrichment Score: 1.2226135999100334
Category	Term	Count	%	PValue	Genes	List Total	Pop Hits	Pop Total	Fold Enrichment	Bonferroni	Benjamini	FDR
PUBMED_ID	16289705	5	0.41425	0.0003889	ILMN_1798014, ILMN_1753716, ILMN_1665717, ILMN_1688534, ILMN_1671921	1207	9	27491	12.6535	0.999351	0.111653	0.840124
PUBMED_ID	10805739	4	0.3314	0.00152434	ILMN_1798014, ILMN_1753716, ILMN_1688534, ILMN_1671921	1207	6	27491	15.1842	1	0.318758	3.25462
PUBMED_ID	9446619	4	0.3314	0.00152434	ILMN_1798014, ILMN_1753716, ILMN_1688534, ILMN_1671921	1207	6	27491	15.1842	1	0.318758	3.25462
PUBMED_ID	14566705	3	0.24855	0.010875	ILMN_1753716, ILMN_1688534, ILMN_1671921	1207	4	27491	17.0822	1	0.85725	21.114
SP_PIR_KEYWORDS	Initiation factor	9	0.74565	0.0145026	ILMN_1655497, ILMN_1798014, ILMN_1753716, ILMN_1671326, ILMN_1665717, ILMN_1688534, ILMN_1697503, ILMN_1762725, ILMN_1671921	1200	52	19235	2.77428	0.998927	0.140953	18.813
PUBMED_ID	10858531	3	0.24855	0.0175997	ILMN_1753716, ILMN_1688534, ILMN_1671921	1207	5	27491	13.6658	1	0.942957	31.9638
PUBMED_ID	12499492	3	0.24855	0.0175997	ILMN_1753716, ILMN_1688534, ILMN_1671921	1207	5	27491	13.6658	1	0.942957	31.9638
PUBMED_ID	8626696	3	0.24855	0.0175997	ILMN_1753716, ILMN_1688534, ILMN_1671921	1207	5	27491	13.6658	1	0.942957	31.9638
PUBMED_ID	15217090	3	0.24855	0.0175997	ILMN_1753716, ILMN_1688534, ILMN_1671921	1207	5	27491	13.6658	1	0.942957	31.9638
PUBMED_ID	18263758	3	0.24855	0.0175997	ILMN_1753716, ILMN_1688534, ILMN_1671921	1207	5	27491	13.6658	1	0.942957	31.9638
PUBMED_ID	12707859	3	0.24855	0.0175997	ILMN_1753716, ILMN_1688534, ILMN_1671921	1207	5	27491	13.6658	1	0.942957	31.9638
PUBMED_ID	15060152	3	0.24855	0.0175997	ILMN_1753716, ILMN_1688534, ILMN_1671921	1207	5	27491	13.6658	1	0.942957	31.9638
PUBMED_ID	18632786	3	0.24855	0.0175997	ILMN_1753716, ILMN_1688534, ILMN_1671921	1207	5	27491	13.6658	1	0.942957	31.9638
PUBMED_ID	11323413	3	0.24855	0.0256374	ILMN_1753716, ILMN_1688534, ILMN_1671921	1207	6	27491	11.3882	1	0.97955	43.0683
PUBMED_ID	16288713	3	0.24855	0.0256374	ILMN_1798014, ILMN_1665717, ILMN_1671921	1207	6	27491	11.3882	1	0.97955	43.0683
BIOCARTA	h_igf1mtorpathway:Skeletal muscle hypertrophy is regulated via AKT/mTOR pathway	6	0.4971	0.0294031	ILMN_1798014, ILMN_1665717, ILMN_1688534, ILMN_1705397, ILMN_1701134, ILMN_1769031	114	23	1437	3.28833	0.992946	0.710189	30.4155
GOTERM_MF_FAT	GO:0008135~translation factor activity, nucleic acid binding	13	1.07705	0.0306858	ILMN_1688534, ILMN_1665717, ILMN_1771264, ILMN_1789171, ILMN_1671921, ILMN_1734508, ILMN_1798014, ILMN_1655497, ILMN_1671326, ILMN_1753716, ILMN_1736048, ILMN_1697503, ILMN_1762725	872	98	12983	1.97504	1	0.474736	38.2449
GOTERM_BP_FAT	GO:0032057~negative regulation of translational initiation in response to stress	3	0.24855	0.0374388	ILMN_1753716, ILMN_1688534, ILMN_1671921	886	5	13528	9.16117	1	0.609262	49.3021
GOTERM_CC_FAT	GO:0005851~eukaryotic translation initiation factor 2B complex	3	0.24855	0.0399085	ILMN_1753716, ILMN_1688534, ILMN_1671921	712	6	12782	8.97612	1	0.322816	44.0774
GOTERM_BP_FAT	GO:0045947~negative regulation of translational initiation	4	0.3314	0.0487333	ILMN_1765091, ILMN_1753716, ILMN_1688534, ILMN_1671921	886	13	13528	4.69804	1	0.676277	58.9101
GOTERM_MF_FAT	GO:0003743~translation initiation factor activity	9	0.74565	0.0500325	ILMN_1655497, ILMN_1798014, ILMN_1753716, ILMN_1671326, ILMN_1665717, ILMN_1688534, ILMN_1697503, ILMN_1762725, ILMN_1671921	872	61	12983	2.1967	1	0.603464	54.7871
GOTERM_BP_FAT	GO:0032055~negative regulation of translation in response to stress	3	0.24855	0.0537558	ILMN_1753716, ILMN_1688534, ILMN_1671921	886	6	13528	7.63431	1	0.706807	62.6055
GOTERM_BP_FAT	GO:0017148~negative regulation of translation	6	0.4971	0.0682247	ILMN_1765091, ILMN_1753716, ILMN_1671326, ILMN_1688534, ILMN_1797367, ILMN_1671921	886	34	13528	2.69446	1	0.768061	71.5767
GOTERM_BP_FAT	GO:0014003~oligodendrocyte development	4	0.3314	0.0704014	ILMN_1781155, ILMN_1753716, ILMN_1688534, ILMN_1671921	886	15	13528	4.07163	1	0.771415	72.7358
GOTERM_BP_FAT	GO:0043558~regulation of translational initiation in response to stress	3	0.24855	0.0720575	ILMN_1753716, ILMN_1688534, ILMN_1671921	886	7	13528	6.5437	1	0.772086	73.5877
GOTERM_BP_FAT	GO:0021782~glial cell development	5	0.41425	0.08643	ILMN_1781155, ILMN_1753716, ILMN_1726387, ILMN_1688534, ILMN_1671921	886	26	13528	2.93627	1	0.815265	79.9957
GOTERM_BP_FAT	GO:0043555~regulation of translation in response to stress	3	0.24855	0.0920152	ILMN_1753716, ILMN_1688534, ILMN_1671921	886	8	13528	5.72573	1	0.829129	82.0646
GOTERM_MF_FAT	GO:0031369~translation initiation factor binding	3	0.24855	0.118257	ILMN_1765091, ILMN_1688534, ILMN_1671921	872	9	12983	4.96292	1	0.786668	85.7206
GOTERM_BP_FAT	GO:0010001~glial cell differentiation	7	0.57995	0.130802	ILMN_1800642, ILMN_1814173, ILMN_1781155, ILMN_1753716, ILMN_1726387, ILMN_1688534, ILMN_1671921	886	53	13528	2.01661	1	0.899899	91.7552
GOTERM_BP_FAT	GO:0042063~gliogenesis	8	0.6628	0.131054	ILMN_1800642, ILMN_1814173, ILMN_1781155, ILMN_1753716, ILMN_1726387, ILMN_1688534, ILMN_1796912, ILMN_1671921	886	65	13528	1.87922	1	0.898981	91.7976
GOTERM_BP_FAT	GO:0006413~translational initiation	6	0.4971	0.169041	ILMN_1798014, ILMN_1753716, ILMN_1665717, ILMN_1688534, ILMN_1762725, ILMN_1671921	886	45	13528	2.03582	1	0.933567	96.2988
GOTERM_BP_FAT	GO:0048709~oligodendrocyte differentiation	4	0.3314	0.171073	ILMN_1781155, ILMN_1753716, ILMN_1688534, ILMN_1671921	886	22	13528	2.77611	1	0.933996	96.4566
BIOCARTA	h_eif2Pathway:Regulation of eIF2	3	0.24855	0.242214	ILMN_1798014, ILMN_1665717, ILMN_1688534	114	12	1437	3.15132	1	0.888354	96.5613
SP_PIR_KEYWORDS	leukodystrophy	3	0.24855	0.263096	ILMN_1753716, ILMN_1688534, ILMN_1671921	1200	16	19235	3.00547	1	0.839873	98.7164
GOTERM_BP_FAT	GO:0006446~regulation of translational initiation	5	0.41425	0.279359	ILMN_1765091, ILMN_1655497, ILMN_1753716, ILMN_1688534, ILMN_1671921	886	41	13528	1.86203	1	0.982299	99.7068
SP_PIR_KEYWORDS	protein biosynthesis	15	1.24275	0.284129	ILMN_1665717, ILMN_1736481, ILMN_1688534, ILMN_1758214, ILMN_1800796, ILMN_1653444, ILMN_1671921, ILMN_1798014, ILMN_1655497, ILMN_1680675, ILMN_1753716, ILMN_1701306, ILMN_1697503, ILMN_1732722, ILMN_1762725, ILMN_1718963	1200	188	19235	1.27892	1	0.855034	99.1508
GOTERM_BP_FAT	GO:0009408~response to heat	6	0.4971	0.303273	ILMN_1781155, ILMN_1753716, ILMN_1688534, ILMN_1671046, ILMN_1813568, ILMN_1671921	886	56	13528	1.63592	1	0.986853	99.8392
GOTERM_BP_FAT	GO:0006412~translation	25	2.07125	0.323773	ILMN_1762747, ILMN_1782257, ILMN_1736481, ILMN_1800796, ILMN_1653444, ILMN_1798014, ILMN_1760441, ILMN_1753716, ILMN_1701306, ILMN_1761175, ILMN_1762725, ILMN_1652147, ILMN_1688534, ILMN_1665717, ILMN_1730999, ILMN_1758214, ILMN_1789171, ILMN_1671921, ILMN_1734508, ILMN_1687279, ILMN_1655497, ILMN_1680675, ILMN_1752967, ILMN_1770035, ILMN_1697503, ILMN_1732722, ILMN_1718963	886	331	13528	1.15322	1	0.989001	99.9055
GOTERM_BP_FAT	GO:0009749~response to glucose stimulus	5	0.41425	0.339634	ILMN_1753716, ILMN_1688534, ILMN_1669425, ILMN_1701134, ILMN_1671921	886	45	13528	1.69651	1	0.990575	99.9381
GOTERM_BP_FAT	GO:0009743~response to carbohydrate stimulus	6	0.4971	0.35591	ILMN_1781155, ILMN_1753716, ILMN_1688534, ILMN_1669425, ILMN_1701134, ILMN_1671921	886	60	13528	1.52686	1	0.992128	99.9603
GOTERM_BP_FAT	GO:0009746~response to hexose stimulus	5	0.41425	0.370002	ILMN_1753716, ILMN_1688534, ILMN_1669425, ILMN_1701134, ILMN_1671921	886	47	13528	1.62432	1	0.993307	99.9732
GOTERM_BP_FAT	GO:0034284~response to monosaccharide stimulus	5	0.41425	0.370002	ILMN_1753716, ILMN_1688534, ILMN_1669425, ILMN_1701134, ILMN_1671921	886	47	13528	1.62432	1	0.993307	99.9732
GOTERM_BP_FAT	GO:0009266~response to temperature stimulus	6	0.4971	0.639839	ILMN_1781155, ILMN_1753716, ILMN_1688534, ILMN_1671046, ILMN_1813568, ILMN_1671921	886	83	13528	1.10376	1	0.999559	100
PUBMED_ID	12588972	3	0.24855	0.754183	ILMN_1655497, ILMN_1798014, ILMN_1665717	1207	61	27491	1.12015	1	1	100
GOTERM_BP_FAT	GO:0009628~response to abiotic stimulus	16	1.3256	0.984761	ILMN_1781155, ILMN_1688534, ILMN_1756787, ILMN_1691188, ILMN_1696065, ILMN_1740216, ILMN_1671046, ILMN_1671921, ILMN_1670875, ILMN_1813568, ILMN_1753716, ILMN_1726387, ILMN_1708764, ILMN_1735093, ILMN_1707062, ILMN_1800331	886	368	13528	0.663853	1	1	100
Annotation Cluster 70	Enrichment Score: 1.2048556683644436
Category	Term	Count	%	PValue	Genes	List Total	Pop Hits	Pop Total	Fold Enrichment	Bonferroni	Benjamini	FDR
GOTERM_BP_FAT	GO:0009071~serine family amino acid catabolic process	5	0.41425	0.00414026	ILMN_1736856, ILMN_1743784, ILMN_1665331, ILMN_1811933, ILMN_1657144, ILMN_1804735	886	11	13528	6.94028	0.999987	0.161058	7.11968
KEGG_PATHWAY	hsa00670:One carbon pool by folate	5	0.41425	0.0129972	ILMN_1743784, ILMN_1679476, ILMN_1665331, ILMN_1811933, ILMN_1661264, ILMN_1772521	306	16	5085	5.19301	0.875082	0.50011	14.5979
GOTERM_BP_FAT	GO:0006544~glycine metabolic process	5	0.41425	0.0138856	ILMN_1736856, ILMN_1743784, ILMN_1665331, ILMN_1811933, ILMN_1661264, ILMN_1657144	886	15	13528	5.08954	1	0.352993	22.0362
GOTERM_BP_FAT	GO:0009069~serine family amino acid metabolic process	6	0.4971	0.0246858	ILMN_1736856, ILMN_1743784, ILMN_1665331, ILMN_1811933, ILMN_1661264, ILMN_1657144, ILMN_1804735	886	26	13528	3.52353	1	0.491927	35.9159
INTERPRO	IPR013977:Glycine cleavage T-protein, C-terminal barrel	3	0.24855	0.0368164	ILMN_1736856, ILMN_1665331, ILMN_1657144	1081	5	16659	9.24644	1	0.701215	46.1502
INTERPRO	IPR006222:Glycine cleavage T-protein, N-terminal	3	0.24855	0.0368164	ILMN_1736856, ILMN_1665331, ILMN_1657144	1081	5	16659	9.24644	1	0.701215	46.1502
GOTERM_MF_FAT	GO:0004047~aminomethyltransferase activity	3	0.24855	0.056274	ILMN_1736856, ILMN_1665331, ILMN_1657144	872	6	12983	7.44438	1	0.61784	59.1691
PUBMED_ID	19161160	6	0.4971	0.0626679	ILMN_1801378, ILMN_1743784, ILMN_1679476, ILMN_1665331, ILMN_1811933, ILMN_1760201, ILMN_1804735	1207	49	27491	2.78894	1	0.999709	75.4314
GOTERM_BP_FAT	GO:0006546~glycine catabolic process	3	0.24855	0.0720575	ILMN_1736856, ILMN_1665331, ILMN_1657144	886	7	13528	6.5437	1	0.772086	73.5877
GOTERM_BP_FAT	GO:0009310~amine catabolic process	9	0.74565	0.136628	ILMN_1687279, ILMN_1752967, ILMN_1736856, ILMN_1788239, ILMN_1760174, ILMN_1743784, ILMN_1665331, ILMN_1811933, ILMN_1657144, ILMN_1804735, ILMN_1718963	886	78	13528	1.76176	1	0.905097	92.6854
GOTERM_BP_FAT	GO:0009063~cellular amino acid catabolic process	8	0.6628	0.155165	ILMN_1736856, ILMN_1788239, ILMN_1760174, ILMN_1743784, ILMN_1665331, ILMN_1811933, ILMN_1657144, ILMN_1804735, ILMN_1718963	886	68	13528	1.79631	1	0.92206	95.0296
KEGG_PATHWAY	hsa00260:Glycine, serine and threonine metabolism	4	0.3314	0.283877	ILMN_1743784, ILMN_1665331, ILMN_1811933, ILMN_1661264, ILMN_1804735	306	31	5085	2.14421	1	0.860029	98.2182
GOTERM_BP_FAT	GO:0046395~carboxylic acid catabolic process	8	0.6628	0.595357	ILMN_1736856, ILMN_1788239, ILMN_1760174, ILMN_1743784, ILMN_1665331, ILMN_1811933, ILMN_1657144, ILMN_1804735, ILMN_1718963	886	111	13528	1.10044	1	0.99926	100
GOTERM_BP_FAT	GO:0016054~organic acid catabolic process	8	0.6628	0.595357	ILMN_1736856, ILMN_1788239, ILMN_1760174, ILMN_1743784, ILMN_1665331, ILMN_1811933, ILMN_1657144, ILMN_1804735, ILMN_1718963	886	111	13528	1.10044	1	0.99926	100
Annotation Cluster 71	Enrichment Score: 1.1789243086559364
Category	Term	Count	%	PValue	Genes	List Total	Pop Hits	Pop Total	Fold Enrichment	Bonferroni	Benjamini	FDR
UP_SEQ_FEATURE	repeat:HEAT 4	8	0.6628	0.0165773	ILMN_1813603, ILMN_1724544, ILMN_1651949, ILMN_1725121, ILMN_1690136, ILMN_1683441, ILMN_1660844, ILMN_1769031	1199	43	19113	2.96573	1	0.55427	25.9901
UP_SEQ_FEATURE	repeat:HEAT 2	9	0.74565	0.0274486	ILMN_1813603, ILMN_1685237, ILMN_1724544, ILMN_1651949, ILMN_1725121, ILMN_1690136, ILMN_1683441, ILMN_1660844, ILMN_1769031	1199	58	19113	2.47357	1	0.706733	39.4145
UP_SEQ_FEATURE	repeat:HEAT 1	9	0.74565	0.0274486	ILMN_1813603, ILMN_1685237, ILMN_1724544, ILMN_1651949, ILMN_1725121, ILMN_1690136, ILMN_1683441, ILMN_1660844, ILMN_1769031	1199	58	19113	2.47357	1	0.706733	39.4145
UP_SEQ_FEATURE	repeat:HEAT 3	8	0.6628	0.0352871	ILMN_1813603, ILMN_1724544, ILMN_1651949, ILMN_1725121, ILMN_1690136, ILMN_1683441, ILMN_1660844, ILMN_1769031	1199	50	19113	2.55053	1	0.757478	47.6289
INTERPRO	IPR011989:Armadillo-like helical	15	1.24275	0.0378105	ILMN_1722345, ILMN_1754531, ILMN_1665869, ILMN_1813603, ILMN_1725121, ILMN_1660844, ILMN_1723117, ILMN_1669377, ILMN_1762275, ILMN_1759495, ILMN_1724544, ILMN_1685237, ILMN_1677226, ILMN_1720926, ILMN_1769031	1081	128	16659	1.80595	1	0.687158	47.06
UP_SEQ_FEATURE	repeat:HEAT 7	5	0.41425	0.0598985	ILMN_1813603, ILMN_1724544, ILMN_1725121, ILMN_1660844, ILMN_1769031	1199	24	19113	3.321	1	0.880899	67.1134
UP_SEQ_FEATURE	repeat:HEAT 5	6	0.4971	0.0653187	ILMN_1813603, ILMN_1724544, ILMN_1725121, ILMN_1690136, ILMN_1660844, ILMN_1769031	1199	35	19113	2.73271	1	0.889253	70.365
UP_SEQ_FEATURE	repeat:HEAT 8	4	0.3314	0.112624	ILMN_1813603, ILMN_1724544, ILMN_1725121, ILMN_1660844	1199	19	19113	3.35595	1	0.96804	88.3669
UP_SEQ_FEATURE	repeat:HEAT 6	5	0.41425	0.115539	ILMN_1813603, ILMN_1724544, ILMN_1725121, ILMN_1660844, ILMN_1769031	1199	30	19113	2.6568	1	0.969935	89.036
INTERPRO	IPR000357:HEAT	7	0.57995	0.144186	ILMN_1813603, ILMN_1724544, ILMN_1651949, ILMN_1653529, ILMN_1801383, ILMN_1683441, ILMN_1660844	1081	55	16659	1.96137	1	0.966436	92.3406
UP_SEQ_FEATURE	repeat:HEAT 10	3	0.24855	0.241377	ILMN_1813603, ILMN_1724544, ILMN_1725121	1199	15	19113	3.18816	1	0.998671	99.3083
UP_SEQ_FEATURE	repeat:HEAT 9	3	0.24855	0.241377	ILMN_1813603, ILMN_1724544, ILMN_1725121	1199	15	19113	3.18816	1	0.998671	99.3083
Annotation Cluster 72	Enrichment Score: 1.0979571318842636
Category	Term	Count	%	PValue	Genes	List Total	Pop Hits	Pop Total	Fold Enrichment	Bonferroni	Benjamini	FDR
INTERPRO	IPR003619:MAD homology 1, Dwarfin-type	5	0.41425	0.00570922	ILMN_1815941, ILMN_1758049, ILMN_1741477, ILMN_1674551, ILMN_1778991	1081	12	16659	6.42114	0.9997	0.236955	9.01518
SMART	SM00523:DWA	5	0.41425	0.0102491	ILMN_1815941, ILMN_1758049, ILMN_1741477, ILMN_1674551, ILMN_1778991	696	12	9079	5.43523	0.953097	0.225063	12.8426
PUBMED_ID	11121043	3	0.24855	0.0175997	ILMN_1741477, ILMN_1674551, ILMN_1710598	1207	5	27491	13.6658	1	0.942957	31.9638
PUBMED_ID	9759503	3	0.24855	0.0451486	ILMN_1815941, ILMN_1741477, ILMN_1674551	1207	8	27491	8.54111	1	0.998277	63.2874
PUBMED_ID	10647776	3	0.24855	0.0451486	ILMN_1815941, ILMN_1741477, ILMN_1674551	1207	8	27491	8.54111	1	0.998277	63.2874
PUBMED_ID	10708949	3	0.24855	0.0451486	ILMN_1815941, ILMN_1741477, ILMN_1674551	1207	8	27491	8.54111	1	0.998277	63.2874
PUBMED_ID	10708948	3	0.24855	0.0563917	ILMN_1815941, ILMN_1741477, ILMN_1674551	1207	9	27491	7.5921	1	0.999476	71.6049
PUBMED_ID	15621726	4	0.3314	0.0697328	ILMN_1815941, ILMN_1741477, ILMN_1674551, ILMN_1710598	1207	22	27491	4.14115	1	0.999866	79.1497
UP_SEQ_FEATURE	domain:MH1	3	0.24855	0.0854229	ILMN_1815941, ILMN_1741477, ILMN_1674551	1199	8	19113	5.97779	1	0.933006	79.9653
UP_SEQ_FEATURE	domain:MH2	3	0.24855	0.0854229	ILMN_1815941, ILMN_1741477, ILMN_1674551	1199	8	19113	5.97779	1	0.933006	79.9653
INTERPRO	IPR013790:Dwarfin	3	0.24855	0.0905877	ILMN_1815941, ILMN_1741477, ILMN_1674551	1081	8	16659	5.77902	1	0.909531	79.1304
INTERPRO	IPR001132:SMAD domain, Dwarfin-type	3	0.24855	0.0905877	ILMN_1815941, ILMN_1741477, ILMN_1674551	1081	8	16659	5.77902	1	0.909531	79.1304
INTERPRO	IPR013019:MAD homology, MH1	3	0.24855	0.0905877	ILMN_1815941, ILMN_1741477, ILMN_1674551	1081	8	16659	5.77902	1	0.909531	79.1304
SMART	SM00524:DWB	3	0.24855	0.120419	ILMN_1815941, ILMN_1741477, ILMN_1674551	696	8	9079	4.8917	1	0.7562	81.9492
GOTERM_MF_FAT	GO:0005072~transforming growth factor beta receptor, cytoplasmic mediator activity	3	0.24855	0.165592	ILMN_1815941, ILMN_1741477, ILMN_1674551	872	11	12983	4.06057	1	0.849383	93.9171
INTERPRO	IPR017855:SMAD domain-like	3	0.24855	0.253603	ILMN_1815941, ILMN_1741477, ILMN_1674551	1081	15	16659	3.08215	1	0.994377	99.1985
KEGG_PATHWAY	hsa04350:TGF-beta signaling pathway	8	0.6628	0.265463	ILMN_1661717, ILMN_1676010, ILMN_1761828, ILMN_1815941, ILMN_1741477, ILMN_1674551, ILMN_1761175, ILMN_1756999	306	87	5085	1.52806	1	0.848427	97.5797
GOTERM_BP_FAT	GO:0030509~BMP signaling pathway	4	0.3314	0.556294	ILMN_1815941, ILMN_1741477, ILMN_1674551, ILMN_1710598	886	44	13528	1.38806	1	0.99888	99.9999
GOTERM_BP_FAT	GO:0007178~transmembrane receptor protein serine/threonine kinase signaling pathway	5	0.41425	0.911822	ILMN_1815941, ILMN_1741477, ILMN_1674551, ILMN_1727524, ILMN_1710598	886	103	13528	0.741195	1	0.999996	100
Annotation Cluster 73	Enrichment Score: 1.093961704885014
Category	Term	Count	%	PValue	Genes	List Total	Pop Hits	Pop Total	Fold Enrichment	Bonferroni	Benjamini	FDR
GOTERM_CC_FAT	GO:0000792~heterochromatin	10	0.8285	0.000340157	ILMN_1747419, ILMN_1814173, ILMN_1682091, ILMN_1746171, ILMN_1695706, ILMN_1815475, ILMN_1705570, ILMN_1666399, ILMN_1777663, ILMN_1797813, ILMN_1656082	712	41	12782	4.3786	0.147482	0.00662631	0.484336
GOTERM_CC_FAT	GO:0001739~sex chromatin	6	0.4971	0.000689917	ILMN_1747419, ILMN_1746171, ILMN_1695706, ILMN_1705570, ILMN_1666399, ILMN_1797813, ILMN_1656082	712	14	12782	7.69382	0.27652	0.0128639	0.980071
GOTERM_CC_FAT	GO:0000803~sex chromosome	6	0.4971	0.000987811	ILMN_1747419, ILMN_1746171, ILMN_1695706, ILMN_1705570, ILMN_1666399, ILMN_1797813, ILMN_1656082	712	15	12782	7.1809	0.37093	0.0164177	1.40048
GOTERM_CC_FAT	GO:0001740~Barr body	3	0.24855	0.00892727	ILMN_1746171, ILMN_1695706, ILMN_1705570, ILMN_1656082	712	3	12782	17.9522	0.98509	0.110259	12.0121
GOTERM_CC_FAT	GO:0031519~PcG protein complex	4	0.3314	0.0153241	ILMN_1747419, ILMN_1666399, ILMN_1797813, ILMN_1708105	712	10	12782	7.1809	0.999285	0.173534	19.7786
GOTERM_CC_FAT	GO:0005720~nuclear heterochromatin	6	0.4971	0.020515	ILMN_1747419, ILMN_1746171, ILMN_1695706, ILMN_1705570, ILMN_1666399, ILMN_1797813, ILMN_1656082	712	29	12782	3.71426	0.99994	0.21576	25.6071
GOTERM_CC_FAT	GO:0000805~X chromosome	3	0.24855	0.0276122	ILMN_1746171, ILMN_1695706, ILMN_1705570, ILMN_1656082	712	5	12782	10.7713	0.999998	0.263173	32.9405
GOTERM_CC_FAT	GO:0000790~nuclear chromatin	8	0.6628	0.0318516	ILMN_1747419, ILMN_1746171, ILMN_1695706, ILMN_1735093, ILMN_1705570, ILMN_1666399, ILMN_1797813, ILMN_1656082, ILMN_1732885	712	55	12782	2.61124	1	0.286353	36.9942
GOTERM_BP_FAT	GO:0006323~DNA packaging	13	1.07705	0.0805948	ILMN_1678962, ILMN_1746171, ILMN_1695706, ILMN_1699636, ILMN_1741572, ILMN_1722423, ILMN_1681503, ILMN_1688638, ILMN_1705570, ILMN_1698441, ILMN_1728556, ILMN_1756793, ILMN_1683441, ILMN_1656082	886	117	13528	1.69651	1	0.803275	77.5949
PUBMED_ID	9566873	5	0.41425	0.090266	ILMN_1676010, ILMN_1714965, ILMN_1746171, ILMN_1695706, ILMN_1705570, ILMN_1656082	1207	39	27491	2.92004	1	0.99998	87.151
GOTERM_CC_FAT	GO:0032993~protein-DNA complex	9	0.74565	0.104983	ILMN_1750079, ILMN_1722423, ILMN_1746171, ILMN_1695706, ILMN_1705570, ILMN_1698441, ILMN_1694502, ILMN_1806818, ILMN_1656082, ILMN_1716480	712	86	12782	1.87872	1	0.573761	79.4603
GOTERM_BP_FAT	GO:0034728~nucleosome organization	10	0.8285	0.153847	ILMN_1725840, ILMN_1681503, ILMN_1722423, ILMN_1746171, ILMN_1695706, ILMN_1688638, ILMN_1705570, ILMN_1698441, ILMN_1781516, ILMN_1797341, ILMN_1656082	886	93	13528	1.64179	1	0.922447	94.8898
PUBMED_ID	11080476	5	0.41425	0.193355	ILMN_1746171, ILMN_1695706, ILMN_1705570, ILMN_1689445, ILMN_1697117, ILMN_1656082	1207	52	27491	2.19003	1	1	99.0538
GOTERM_BP_FAT	GO:0006333~chromatin assembly or disassembly	12	0.9942	0.208739	ILMN_1746171, ILMN_1654583, ILMN_1695706, ILMN_1815475, ILMN_1778930, ILMN_1804679, ILMN_1722423, ILMN_1681503, ILMN_1688638, ILMN_1705570, ILMN_1698441, ILMN_1781516, ILMN_1656082	886	127	13528	1.4427	1	0.960027	98.4516
PUBMED_ID	14657027	4	0.3314	0.243803	ILMN_1714965, ILMN_1746171, ILMN_1695706, ILMN_1705570, ILMN_1656082	1207	39	27491	2.33603	1	1	99.7668
INTERPRO	IPR009072:Histone-fold	6	0.4971	0.271238	ILMN_1746171, ILMN_1695706, ILMN_1705570, ILMN_1737535, ILMN_1810488, ILMN_1785198, ILMN_1656082	1081	54	16659	1.7123	1	0.995779	99.4598
PUBMED_ID	11689053	3	0.24855	0.458029	ILMN_1746171, ILMN_1695706, ILMN_1705570, ILMN_1656082	1207	35	27491	1.95225	1	1	99.9998
GOTERM_CC_FAT	GO:0000786~nucleosome	5	0.41425	0.467661	ILMN_1722423, ILMN_1746171, ILMN_1695706, ILMN_1705570, ILMN_1698441, ILMN_1656082	712	63	12782	1.42478	1	0.949551	99.9876
GOTERM_BP_FAT	GO:0031497~chromatin assembly	7	0.57995	0.507876	ILMN_1681503, ILMN_1722423, ILMN_1746171, ILMN_1695706, ILMN_1688638, ILMN_1705570, ILMN_1698441, ILMN_1656082	886	87	13528	1.22851	1	0.998197	99.9997
GOTERM_BP_FAT	GO:0006334~nucleosome assembly	6	0.4971	0.650375	ILMN_1681503, ILMN_1722423, ILMN_1746171, ILMN_1695706, ILMN_1705570, ILMN_1698441, ILMN_1656082	886	84	13528	1.09062	1	0.999572	100
GOTERM_BP_FAT	GO:0065004~protein-DNA complex assembly	6	0.4971	0.718502	ILMN_1681503, ILMN_1722423, ILMN_1746171, ILMN_1695706, ILMN_1705570, ILMN_1698441, ILMN_1656082	886	91	13528	1.00672	1	0.999821	100
INTERPRO	IPR007125:Histone core	3	0.24855	0.798595	ILMN_1746171, ILMN_1695706, ILMN_1705570, ILMN_1656082	1081	45	16659	1.02738	1	1	100
SP_PIR_KEYWORDS	nucleosome core	3	0.24855	0.809548	ILMN_1746171, ILMN_1695706, ILMN_1705570, ILMN_1656082	1200	48	19235	1.00182	1	0.995605	100
KEGG_PATHWAY	hsa05322:Systemic lupus erythematosus	4	0.3314	0.94241	ILMN_1746171, ILMN_1695706, ILMN_1799103, ILMN_1705570, ILMN_1656082	306	99	5085	0.67142	1	0.998326	100
Annotation Cluster 74	Enrichment Score: 1.076900039657203
Category	Term	Count	%	PValue	Genes	List Total	Pop Hits	Pop Total	Fold Enrichment	Bonferroni	Benjamini	FDR
GOTERM_CC_FAT	GO:0000123~histone acetyltransferase complex	9	0.74565	0.00593631	ILMN_1698441, ILMN_1736015, ILMN_1737535, ILMN_1801488, ILMN_1730019, ILMN_1684802, ILMN_1660368, ILMN_1673023, ILMN_1746276	712	50	12782	3.2314	0.938728	0.0835643	8.14586
GOTERM_BP_FAT	GO:0016573~histone acetylation	9	0.74565	0.0118728	ILMN_1747419, ILMN_1698441, ILMN_1736015, ILMN_1801488, ILMN_1730019, ILMN_1660368, ILMN_1804679, ILMN_1673023, ILMN_1746276	886	48	13528	2.86287	1	0.319677	19.1541
GOTERM_BP_FAT	GO:0043967~histone H4 acetylation	4	0.3314	0.139073	ILMN_1736015, ILMN_1660368, ILMN_1673023, ILMN_1746276	886	20	13528	3.05372	1	0.908026	93.0456
PUBMED_ID	14966270	3	0.24855	0.169708	ILMN_1660368, ILMN_1673023, ILMN_1746276	1207	17	27491	4.01935	1	1	98.2293
GOTERM_CC_FAT	GO:0035267~NuA4 histone acetyltransferase complex	3	0.24855	0.181113	ILMN_1660368, ILMN_1673023, ILMN_1746276	712	14	12782	3.84691	1	0.747941	94.2238
GOTERM_BP_FAT	GO:0043968~histone H2A acetylation	3	0.24855	0.182969	ILMN_1660368, ILMN_1673023, ILMN_1746276	886	12	13528	3.81716	1	0.943934	97.2606
GOTERM_CC_FAT	GO:0043189~H4/H2A histone acetyltransferase complex	3	0.24855	0.201705	ILMN_1660368, ILMN_1673023, ILMN_1746276	712	15	12782	3.59045	1	0.760156	95.984
PUBMED_ID	12963728	3	0.24855	0.218144	ILMN_1660368, ILMN_1673023, ILMN_1746276	1207	20	27491	3.41645	1	1	99.5192
Annotation Cluster 75	Enrichment Score: 1.0576687342836308
Category	Term	Count	%	PValue	Genes	List Total	Pop Hits	Pop Total	Fold Enrichment	Bonferroni	Benjamini	FDR
GOTERM_MF_FAT	GO:0035258~steroid hormone receptor binding	8	0.6628	0.0120898	ILMN_1777783, ILMN_1707175, ILMN_1781386, ILMN_1696087, ILMN_1795852, ILMN_1695797, ILMN_1718629, ILMN_1780598	872	38	12983	3.13448	0.999966	0.275268	17.1477
GOTERM_BP_FAT	GO:0042921~glucocorticoid receptor signaling pathway	3	0.24855	0.0720575	ILMN_1695797, ILMN_1762085, ILMN_1797341	886	7	13528	6.5437	1	0.772086	73.5877
PUBMED_ID	11266503	3	0.24855	0.0813355	ILMN_1721729, ILMN_1718629, ILMN_1762085	1207	11	27491	6.21172	1	0.999952	84.1186
GOTERM_BP_FAT	GO:0030518~steroid hormone receptor signaling pathway	8	0.6628	0.0829259	ILMN_1741253, ILMN_1721729, ILMN_1795852, ILMN_1695797, ILMN_1718629, ILMN_1762085, ILMN_1797341, ILMN_1780598	886	58	13528	2.10602	1	0.806007	78.5849
GOTERM_BP_FAT	GO:0031958~corticosteroid receptor signaling pathway	3	0.24855	0.0920152	ILMN_1695797, ILMN_1762085, ILMN_1797341	886	8	13528	5.72573	1	0.829129	82.0646
GOTERM_MF_FAT	GO:0050681~androgen receptor binding	5	0.41425	0.0928406	ILMN_1707175, ILMN_1781386, ILMN_1795852, ILMN_1718629, ILMN_1780598	872	26	12983	2.86322	1	0.730177	77.84
GOTERM_BP_FAT	GO:0030522~intracellular receptor-mediated signaling pathway	9	0.74565	0.115996	ILMN_1741253, ILMN_1721729, ILMN_1795852, ILMN_1695797, ILMN_1718629, ILMN_1783606, ILMN_1762085, ILMN_1797341, ILMN_1780598	886	75	13528	1.83223	1	0.879238	88.8628
GOTERM_BP_FAT	GO:0030521~androgen receptor signaling pathway	5	0.41425	0.207073	ILMN_1721729, ILMN_1795852, ILMN_1718629, ILMN_1797341, ILMN_1780598	886	36	13528	2.12064	1	0.960178	98.3925
PUBMED_ID	15572661	3	0.24855	0.251044	ILMN_1795852, ILMN_1718629, ILMN_1780598	1207	22	27491	3.10586	1	1	99.8108
Annotation Cluster 76	Enrichment Score: 1.0555749178024945
Category	Term	Count	%	PValue	Genes	List Total	Pop Hits	Pop Total	Fold Enrichment	Bonferroni	Benjamini	FDR
GOTERM_CC_FAT	GO:0005657~replication fork	7	0.57995	0.00759263	ILMN_1750079, ILMN_1659364, ILMN_1737314, ILMN_1784860, ILMN_1694502, ILMN_1724489, ILMN_1806818	712	32	12782	3.92705	0.971971	0.0997954	10.306
GOTERM_CC_FAT	GO:0032993~protein-DNA complex	9	0.74565	0.104983	ILMN_1750079, ILMN_1722423, ILMN_1746171, ILMN_1695706, ILMN_1705570, ILMN_1698441, ILMN_1694502, ILMN_1806818, ILMN_1656082, ILMN_1716480	712	86	12782	1.87872	1	0.573761	79.4603
GOTERM_CC_FAT	GO:0030894~replisome	3	0.24855	0.181113	ILMN_1750079, ILMN_1694502, ILMN_1806818	712	14	12782	3.84691	1	0.747941	94.2238
GOTERM_CC_FAT	GO:0043601~nuclear replisome	3	0.24855	0.181113	ILMN_1750079, ILMN_1694502, ILMN_1806818	712	14	12782	3.84691	1	0.747941	94.2238
GOTERM_CC_FAT	GO:0043596~nuclear replication fork	3	0.24855	0.201705	ILMN_1750079, ILMN_1694502, ILMN_1806818	712	15	12782	3.59045	1	0.760156	95.984
Annotation Cluster 77	Enrichment Score: 1.053205731515078
Category	Term	Count	%	PValue	Genes	List Total	Pop Hits	Pop Total	Fold Enrichment	Bonferroni	Benjamini	FDR
GOTERM_BP_FAT	GO:0010608~posttranscriptional regulation of gene expression	23	1.90555	0.0203925	ILMN_1765091, ILMN_1722345, ILMN_1688534, ILMN_1797367, ILMN_1718571, ILMN_1721994, ILMN_1750800, ILMN_1706493, ILMN_1751368, ILMN_1671921, ILMN_1655137, ILMN_1655497, ILMN_1671326, ILMN_1753716, ILMN_1729767, ILMN_1815941, ILMN_1773968, ILMN_1689001, ILMN_1769606, ILMN_1732722, ILMN_1701134, ILMN_1769031, ILMN_1745969	886	211	13528	1.66435	1	0.444296	30.7039
GOTERM_BP_FAT	GO:0006417~regulation of translation	15	1.24275	0.0642818	ILMN_1765091, ILMN_1722345, ILMN_1688534, ILMN_1797367, ILMN_1750800, ILMN_1706493, ILMN_1671921, ILMN_1655497, ILMN_1671326, ILMN_1753716, ILMN_1729767, ILMN_1689001, ILMN_1769606, ILMN_1732722, ILMN_1769031	886	137	13528	1.67175	1	0.754917	69.3577
GOTERM_BP_FAT	GO:0032268~regulation of cellular protein metabolic process	32	2.6512	0.528232	ILMN_1657937, ILMN_1750800, ILMN_1760542, ILMN_1760201, ILMN_1671696, ILMN_1753716, ILMN_1671326, ILMN_1815941, ILMN_1769606, ILMN_1804735, ILMN_1765091, ILMN_1722345, ILMN_1781155, ILMN_1688534, ILMN_1797367, ILMN_1799688, ILMN_1675497, ILMN_1727524, ILMN_1706493, ILMN_1671921, ILMN_1780598, ILMN_1655497, ILMN_1714965, ILMN_1693145, ILMN_1729767, ILMN_1720926, ILMN_1788107, ILMN_1689001, ILMN_17…	886	474	13528	1.03079	1	0.998531	99.9998
Annotation Cluster 78	Enrichment Score: 1.0503547087495932
Category	Term	Count	%	PValue	Genes	List Total	Pop Hits	Pop Total	Fold Enrichment	Bonferroni	Benjamini	FDR
BBID	107.mRNA_translation-protein_synthesis	4	0.3314	0.0309315	ILMN_1753716, ILMN_1705397, ILMN_1813489, ILMN_1769031	23	12	358	5.18841	0.756806	0.756806	25.5829
BBID	106.Glycogen_synthase-synthesis	3	0.24855	0.0806332	ILMN_1705397, ILMN_1813489, ILMN_1769031	23	8	358	5.83696	0.977249	0.849166	54.6438
BBID	105.Signaling_glucose_uptake	3	0.24855	0.120246	ILMN_1705397, ILMN_1813489, ILMN_1769031	23	10	358	4.66957	0.996865	0.763374	70.0255
BBID	104.Insulin_signaling	3	0.24855	0.209698	ILMN_1705397, ILMN_1813489, ILMN_1769031	23	14	358	3.3354	0.999975	0.828822	89.0652
Annotation Cluster 79	Enrichment Score: 1.04531877333902
Category	Term	Count	%	PValue	Genes	List Total	Pop Hits	Pop Total	Fold Enrichment	Bonferroni	Benjamini	FDR
BIOCARTA	h_g1Pathway:Cell Cycle: G1/S Check Point	6	0.4971	0.0712596	ILMN_1772165, ILMN_1661717, ILMN_1665538, ILMN_1795852, ILMN_1689001, ILMN_1741477	114	29	1437	2.60799	0.999995	0.744242	59.2722
GOTERM_BP_FAT	GO:0000082~G1/S transition of mitotic cell cycle	8	0.6628	0.071398	ILMN_1772165, ILMN_1761828, ILMN_1672357, ILMN_1695792, ILMN_1665538, ILMN_1795852, ILMN_1689001, ILMN_1741801	886	56	13528	2.18123	1	0.771338	73.2515
BIOCARTA	h_p53Pathway:p53 Signaling Pathway	4	0.3314	0.143719	ILMN_1772165, ILMN_1659463, ILMN_1795852, ILMN_1689001	114	17	1437	2.96594	1	0.820408	84.8212
Annotation Cluster 80	Enrichment Score: 1.0352845912784518
Category	Term	Count	%	PValue	Genes	List Total	Pop Hits	Pop Total	Fold Enrichment	Bonferroni	Benjamini	FDR
GOTERM_BP_FAT	GO:0006304~DNA modification	7	0.57995	0.0186653	ILMN_1777096, ILMN_1714438, ILMN_1688638, ILMN_1708764, ILMN_1783606, ILMN_1769606, ILMN_1760201	886	33	13528	3.2388	1	0.422381	28.4963
GOTERM_BP_FAT	GO:0006305~DNA alkylation	4	0.3314	0.204907	ILMN_1688638, ILMN_1783606, ILMN_1769606, ILMN_1760201	886	24	13528	2.54477	1	0.959314	98.3125
GOTERM_BP_FAT	GO:0006306~DNA methylation	4	0.3314	0.204907	ILMN_1688638, ILMN_1783606, ILMN_1769606, ILMN_1760201	886	24	13528	2.54477	1	0.959314	98.3125
Annotation Cluster 81	Enrichment Score: 1.0262674447085132
Category	Term	Count	%	PValue	Genes	List Total	Pop Hits	Pop Total	Fold Enrichment	Bonferroni	Benjamini	FDR
GOTERM_BP_FAT	GO:0000082~G1/S transition of mitotic cell cycle	8	0.6628	0.071398	ILMN_1772165, ILMN_1761828, ILMN_1672357, ILMN_1695792, ILMN_1665538, ILMN_1795852, ILMN_1689001, ILMN_1741801	886	56	13528	2.18123	1	0.771338	73.2515
GOTERM_BP_FAT	GO:0051325~interphase	12	0.9942	0.0859507	ILMN_1772165, ILMN_1761828, ILMN_1660222, ILMN_1672357, ILMN_1695792, ILMN_1665538, ILMN_1795852, ILMN_1689001, ILMN_1799688, ILMN_1810628, ILMN_1741801, ILMN_1670875	886	106	13528	1.72852	1	0.815609	79.8081
GOTERM_BP_FAT	GO:0051329~interphase of mitotic cell cycle	11	0.91135	0.135913	ILMN_1772165, ILMN_1761828, ILMN_1660222, ILMN_1672357, ILMN_1695792, ILMN_1665538, ILMN_1795852, ILMN_1689001, ILMN_1799688, ILMN_1741801, ILMN_1670875	886	103	13528	1.63063	1	0.905161	92.5769
Annotation Cluster 82	Enrichment Score: 1.00096186985033
Category	Term	Count	%	PValue	Genes	List Total	Pop Hits	Pop Total	Fold Enrichment	Bonferroni	Benjamini	FDR
GOTERM_BP_FAT	GO:0006308~DNA catabolic process	11	0.91135	0.00518435	ILMN_1783753, ILMN_1777096, ILMN_1763575, ILMN_1678962, ILMN_1756787, ILMN_1714438, ILMN_1708764, ILMN_1727617, ILMN_1659463, ILMN_1740216, ILMN_1732885	886	60	13528	2.79925	0.999999	0.184596	8.83803
PUBMED_ID	11002417	4	0.3314	0.0106636	ILMN_1756787, ILMN_1657937, ILMN_1789830, ILMN_1727142	1207	11	27491	8.28229	1	0.854385	20.7475
GOTERM_BP_FAT	GO:0022411~cellular component disassembly	9	0.74565	0.0209579	ILMN_1783753, ILMN_1680675, ILMN_1713129, ILMN_1678962, ILMN_1756787, ILMN_1727617, ILMN_1659463, ILMN_1701306, ILMN_1781516, ILMN_1734508	886	53	13528	2.59279	1	0.446519	31.4125
BIOCARTA	h_deathPathway:Induction of apoptosis through DR3 and DR4/5 Death Receptors	7	0.57995	0.0257665	ILMN_1714965, ILMN_1678962, ILMN_1723900, ILMN_1756787, ILMN_1657937, ILMN_1659463, ILMN_1789830	114	30	1437	2.94123	0.986876	0.764122	27.1806
KEGG_PATHWAY	hsa04210:Apoptosis	10	0.8285	0.0751743	ILMN_1690546, ILMN_1714965, ILMN_1678962, ILMN_1756787, ILMN_1738523, ILMN_1657937, ILMN_1707308, ILMN_1659463, ILMN_1789830, ILMN_1727142	306	87	5085	1.91007	0.999996	0.615509	61.0402
GOTERM_BP_FAT	GO:0030262~apoptotic nuclear changes	5	0.41425	0.08643	ILMN_1783753, ILMN_1678962, ILMN_1756787, ILMN_1699636, ILMN_1659463	886	26	13528	2.93627	1	0.815265	79.9957
GOTERM_BP_FAT	GO:0000737~DNA catabolic process, endonucleolytic	5	0.41425	0.08643	ILMN_1783753, ILMN_1678962, ILMN_1756787, ILMN_1659463, ILMN_1740216	886	26	13528	2.93627	1	0.815265	79.9957
BBID	86.Apoptosis_Nematode&_Vert	3	0.24855	0.0998579	ILMN_1756787, ILMN_1659463, ILMN_1789830	23	9	358	5.18841	0.99121	0.793621	62.8186
GOTERM_BP_FAT	GO:0006997~nucleus organization	7	0.57995	0.122335	ILMN_1783753, ILMN_1678962, ILMN_1756787, ILMN_1699636, ILMN_1659463, ILMN_1751338, ILMN_1801421	886	52	13528	2.05539	1	0.890229	90.202
GOTERM_BP_FAT	GO:0006309~DNA fragmentation involved in apoptosis	4	0.3314	0.123918	ILMN_1783753, ILMN_1678962, ILMN_1756787, ILMN_1659463	886	19	13528	3.21445	1	0.889053	90.512
BBID	150.caspase_and_NFKB_activation	3	0.24855	0.186481	ILMN_1714965, ILMN_1756787, ILMN_1657937	23	13	358	3.59197	0.999907	0.843934	85.643
GOTERM_BP_FAT	GO:0006921~cell structure disassembly during apoptosis	4	0.3314	0.187792	ILMN_1783753, ILMN_1678962, ILMN_1756787, ILMN_1659463	886	23	13528	2.65541	1	0.947665	97.5346
BIOCARTA	h_HivnefPathway:HIV-I Nef: negative effector of Fas and TNF	7	0.57995	0.232967	ILMN_1714965, ILMN_1678962, ILMN_1756787, ILMN_1657937, ILMN_1736568, ILMN_1659463, ILMN_1789830	114	53	1437	1.66485	1	0.889348	96.0152
BIOCARTA	h_caspasePathway:Caspase Cascade in Apoptosis	4	0.3314	0.290952	ILMN_1678962, ILMN_1756787, ILMN_1736568, ILMN_1659463	114	24	1437	2.10088	1	0.916388	98.4668
BIOCARTA	h_tnfr1Pathway:TNFR1 Signaling Pathway	4	0.3314	0.42419	ILMN_1678962, ILMN_1756787, ILMN_1657937, ILMN_1736568	114	30	1437	1.6807	1	0.962086	99.8778
BIOCARTA	h_mitochondriaPathway:Role of Mitochondria in Apoptotic Signaling	3	0.24855	0.526799	ILMN_1678962, ILMN_1756787, ILMN_1659463	114	22	1437	1.7189	1	0.986199	99.9887
BIOCARTA	h_fasPathway:FAS signaling pathway ( CD95 )	3	0.24855	0.715404	ILMN_1678962, ILMN_1756787, ILMN_1789830	114	31	1437	1.21986	1	0.998203	100
Annotation Cluster 83	Enrichment Score: 0.9904783290248286
Category	Term	Count	%	PValue	Genes	List Total	Pop Hits	Pop Total	Fold Enrichment	Bonferroni	Benjamini	FDR
UP_SEQ_FEATURE	zinc finger region:CCHC-type 3	3	0.24855	0.0667767	ILMN_1655137, ILMN_1786852, ILMN_1723007	1199	7	19113	6.83176	1	0.892165	71.1863
UP_SEQ_FEATURE	zinc finger region:CCHC-type 1	3	0.24855	0.126465	ILMN_1655137, ILMN_1786852, ILMN_1723007	1199	10	19113	4.78224	1	0.978133	91.2347
UP_SEQ_FEATURE	zinc finger region:CCHC-type 2	3	0.24855	0.126465	ILMN_1655137, ILMN_1786852, ILMN_1723007	1199	10	19113	4.78224	1	0.978133	91.2347
Annotation Cluster 84	Enrichment Score: 0.989015883120319
Category	Term	Count	%	PValue	Genes	List Total	Pop Hits	Pop Total	Fold Enrichment	Bonferroni	Benjamini	FDR
KEGG_PATHWAY	hsa03410:Base excision repair	7	0.57995	0.0164407	ILMN_1777096, ILMN_1812622, ILMN_1767894, ILMN_1714438, ILMN_1708764, ILMN_1785198, ILMN_1775885	306	35	5085	3.32353	0.928338	0.482605	18.1232
GOTERM_BP_FAT	GO:0006284~base-excision repair	6	0.4971	0.0287146	ILMN_1777096, ILMN_1812622, ILMN_1767894, ILMN_1714438, ILMN_1708764, ILMN_1775885	886	27	13528	3.39303	1	0.528426	40.4684
GOTERM_MF_FAT	GO:0019104~DNA N-glycosylase activity	3	0.24855	0.165592	ILMN_1777096, ILMN_1812622, ILMN_1714438	872	11	12983	4.06057	1	0.849383	93.9171
SP_PIR_KEYWORDS	glycosidase	7	0.57995	0.370231	ILMN_1777096, ILMN_1812622, ILMN_1796349, ILMN_1714438, ILMN_1815148, ILMN_1800733, ILMN_1669878	1200	79	19235	1.42031	1	0.904843	99.8635
GOTERM_MF_FAT	GO:0016799~hydrolase activity, hydrolyzing N-glycosyl compounds	3	0.24855	0.392092	ILMN_1777096, ILMN_1812622, ILMN_1714438	872	20	12983	2.23331	1	0.975228	99.9546
Annotation Cluster 85	Enrichment Score: 0.9739508788245154
Category	Term	Count	%	PValue	Genes	List Total	Pop Hits	Pop Total	Fold Enrichment	Bonferroni	Benjamini	FDR
GOTERM_BP_FAT	GO:0051726~regulation of cell cycle	35	2.89975	0.00589356	ILMN_1814173, ILMN_1777783, ILMN_1660222, ILMN_1737314, ILMN_1786433, ILMN_1725121, ILMN_1740216, ILMN_1660368, ILMN_1691444, ILMN_1763575, ILMN_1797445, ILMN_1688638, ILMN_1786396, ILMN_1665538, ILMN_1784584, ILMN_1762407, ILMN_1711023, ILMN_1756787, ILMN_1730999, ILMN_1653828, ILMN_1691188, ILMN_1799688, ILMN_1741801, ILMN_1814122, ILMN_1689665, ILMN_1712452, ILMN_1693145, ILMN_1732705, ILMN_16…	886	331	13528	1.61451	1	0.199406	9.98808
GOTERM_BP_FAT	GO:0007346~regulation of mitotic cell cycle	15	1.24275	0.122759	ILMN_1814173, ILMN_1777783, ILMN_1660222, ILMN_1737314, ILMN_1730999, ILMN_1653828, ILMN_1799688, ILMN_1660368, ILMN_1689665, ILMN_1712452, ILMN_1693145, ILMN_1797445, ILMN_1786396, ILMN_1772455, ILMN_1778557	886	152	13528	1.50677	1	0.889614	90.286
GOTERM_BP_FAT	GO:0010564~regulation of cell cycle process	12	0.9942	0.125897	ILMN_1814173, ILMN_1712452, ILMN_1737314, ILMN_1688638, ILMN_1797445, ILMN_1730999, ILMN_1735093, ILMN_1786396, ILMN_1799688, ILMN_1741801, ILMN_1725121, ILMN_1778557	886	114	13528	1.60722	1	0.891679	90.8864
GOTERM_BP_FAT	GO:0030071~regulation of mitotic metaphase/anaphase transition	4	0.3314	0.171073	ILMN_1797445, ILMN_1730999, ILMN_1786396, ILMN_1799688	886	22	13528	2.77611	1	0.933996	96.4566
GOTERM_BP_FAT	GO:0007088~regulation of mitosis	6	0.4971	0.303273	ILMN_1712452, ILMN_1797445, ILMN_1730999, ILMN_1786396, ILMN_1799688, ILMN_1778557	886	56	13528	1.63592	1	0.986853	99.8392
GOTERM_BP_FAT	GO:0051783~regulation of nuclear division	6	0.4971	0.303273	ILMN_1712452, ILMN_1797445, ILMN_1730999, ILMN_1786396, ILMN_1799688, ILMN_1778557	886	56	13528	1.63592	1	0.986853	99.8392
Annotation Cluster 86	Enrichment Score: 0.9718535987790188
Category	Term	Count	%	PValue	Genes	List Total	Pop Hits	Pop Total	Fold Enrichment	Bonferroni	Benjamini	FDR
INTERPRO	IPR001005:SANT, DNA-binding	9	0.74565	0.0127658	ILMN_1763091, ILMN_1713129, ILMN_1750075, ILMN_1778930, ILMN_1660551, ILMN_1682232, ILMN_1708105, ILMN_1673023, ILMN_1682095	1081	49	16659	2.83054	1	0.4146	19.1039
SMART	SM00717:SANT	9	0.74565	0.0311336	ILMN_1763091, ILMN_1713129, ILMN_1750075, ILMN_1778930, ILMN_1660551, ILMN_1682232, ILMN_1708105, ILMN_1673023, ILMN_1682095	696	49	9079	2.39594	0.999917	0.444065	34.4269
INTERPRO	IPR017877:MYB-like	3	0.24855	0.0709133	ILMN_1713129, ILMN_1750075, ILMN_1673023	1081	7	16659	6.6046	1	0.854865	70.2903
INTERPRO	IPR014778:Myb, DNA-binding	5	0.41425	0.189113	ILMN_1763091, ILMN_1713129, ILMN_1750075, ILMN_1682232, ILMN_1682095	1081	35	16659	2.20153	1	0.985642	96.854
UP_SEQ_FEATURE	domain:ELM2	3	0.24855	0.194166	ILMN_1763091, ILMN_1682232, ILMN_1682095	1199	13	19113	3.67864	1	0.995843	97.9489
INTERPRO	IPR000949:ELM2	3	0.24855	0.204524	ILMN_1763091, ILMN_1682232, ILMN_1682095	1081	13	16659	3.55632	1	0.988927	97.7078
INTERPRO	IPR017884:SANT, eukarya	4	0.3314	0.235955	ILMN_1763091, ILMN_1660551, ILMN_1682232, ILMN_1682095	1081	26	16659	2.37088	1	0.993381	98.8214
UP_SEQ_FEATURE	domain:SANT	3	0.24855	0.336276	ILMN_1763091, ILMN_1660551, ILMN_1682232	1199	19	19113	2.51697	1	0.999845	99.9376
Annotation Cluster 87	Enrichment Score: 0.9663743183894541
Category	Term	Count	%	PValue	Genes	List Total	Pop Hits	Pop Total	Fold Enrichment	Bonferroni	Benjamini	FDR
GOTERM_BP_FAT	GO:0022411~cellular component disassembly	9	0.74565	0.0209579	ILMN_1783753, ILMN_1680675, ILMN_1713129, ILMN_1678962, ILMN_1756787, ILMN_1727617, ILMN_1659463, ILMN_1701306, ILMN_1781516, ILMN_1734508	886	53	13528	2.59279	1	0.446519	31.4125
GOTERM_BP_FAT	GO:0034623~cellular macromolecular complex disassembly	5	0.41425	0.08643	ILMN_1680675, ILMN_1713129, ILMN_1727617, ILMN_1701306, ILMN_1781516, ILMN_1734508	886	26	13528	2.93627	1	0.815265	79.9957
GOTERM_BP_FAT	GO:0032984~macromolecular complex disassembly	5	0.41425	0.08643	ILMN_1680675, ILMN_1713129, ILMN_1727617, ILMN_1701306, ILMN_1781516, ILMN_1734508	886	26	13528	2.93627	1	0.815265	79.9957
GOTERM_BP_FAT	GO:0043241~protein complex disassembly	3	0.24855	0.306709	ILMN_1713129, ILMN_1727617, ILMN_1734508	886	17	13528	2.69446	1	0.987367	99.8528
GOTERM_BP_FAT	GO:0043624~cellular protein complex disassembly	3	0.24855	0.306709	ILMN_1713129, ILMN_1727617, ILMN_1734508	886	17	13528	2.69446	1	0.987367	99.8528
Annotation Cluster 88	Enrichment Score: 0.9516414177651619
Category	Term	Count	%	PValue	Genes	List Total	Pop Hits	Pop Total	Fold Enrichment	Bonferroni	Benjamini	FDR
PUBMED_ID	12838346	10	0.8285	0.00280617	ILMN_1756873, ILMN_1739454, ILMN_1658373, ILMN_1715452, ILMN_1686319, ILMN_1798712, ILMN_1725862, ILMN_1777526, ILMN_1722953, ILMN_1659523	1207	68	27491	3.34946	1	0.468104	5.91301
PUBMED_ID	14715245	5	0.41425	0.0167522	ILMN_1756873, ILMN_1739454, ILMN_1658373, ILMN_1686319, ILMN_1722953	1207	23	27491	4.95137	1	0.938981	30.6793
INTERPRO	IPR001394:Peptidase C19, ubiquitin carboxyl-terminal hydrolase 2	8	0.6628	0.0985667	ILMN_1756873, ILMN_1739454, ILMN_1658373, ILMN_1686319, ILMN_1798712, ILMN_1725862, ILMN_1722953, ILMN_1659523	1081	61	16659	2.02108	1	0.920753	81.9548
INTERPRO	IPR018200:Peptidase C19, ubiquitin carboxyl-terminal hydrolase 2, conserved site	7	0.57995	0.181806	ILMN_1756873, ILMN_1739454, ILMN_1686319, ILMN_1798712, ILMN_1725862, ILMN_1722953, ILMN_1659523	1081	59	16659	1.82839	1	0.983767	96.3521
GOTERM_MF_FAT	GO:0004221~ubiquitin thiolesterase activity	8	0.6628	0.236903	ILMN_1756873, ILMN_1739454, ILMN_1658373, ILMN_1686319, ILMN_1798712, ILMN_1725862, ILMN_1722953, ILMN_1659523	872	75	12983	1.58813	1	0.921486	98.4722
GOTERM_MF_FAT	GO:0016790~thiolester hydrolase activity	9	0.74565	0.376875	ILMN_1756873, ILMN_1739454, ILMN_1658373, ILMN_1686319, ILMN_1798712, ILMN_1750664, ILMN_1725862, ILMN_1722953, ILMN_1659523	872	102	12983	1.31371	1	0.972044	99.9335
SP_PIR_KEYWORDS	thiol protease	9	0.74565	0.530794	ILMN_1756873, ILMN_1739454, ILMN_1756787, ILMN_1736568, ILMN_1686319, ILMN_1798712, ILMN_1725862, ILMN_1722953, ILMN_1812161	1200	126	19235	1.14494	1	0.960024	99.998
GOTERM_MF_FAT	GO:0008234~cysteine-type peptidase activity	10	0.8285	0.610448	ILMN_1756873, ILMN_1739454, ILMN_1756787, ILMN_1736568, ILMN_1686319, ILMN_1789830, ILMN_1798712, ILMN_1725862, ILMN_1722953, ILMN_1812161	872	141	12983	1.05594	1	0.996666	100
Annotation Cluster 89	Enrichment Score: 0.9475601880411771
Category	Term	Count	%	PValue	Genes	List Total	Pop Hits	Pop Total	Fold Enrichment	Bonferroni	Benjamini	FDR
INTERPRO	IPR011990:Tetratricopeptide-like helical	19	1.57415	0.0131786	ILMN_1696375, ILMN_1694584, ILMN_1795911, ILMN_1660810, ILMN_1799688, ILMN_1797822, ILMN_1685631, ILMN_1789171, ILMN_1725840, ILMN_1803590, ILMN_1669142, ILMN_1697639, ILMN_1693227, ILMN_1696654, ILMN_1655117, ILMN_1701262, ILMN_1654488, ILMN_1727309, ILMN_1762990	1081	157	16659	1.86499	1	0.415555	19.6602
UP_SEQ_FEATURE	repeat:TPR 4	12	0.9942	0.040179	ILMN_1669142, ILMN_1803590, ILMN_1697639, ILMN_1731185, ILMN_1655117, ILMN_1696654, ILMN_1795911, ILMN_1660810, ILMN_1799688, ILMN_1685631, ILMN_1654488, ILMN_1762990	1199	97	19113	1.97206	1	0.797321	52.2096
UP_SEQ_FEATURE	repeat:TPR 5	10	0.8285	0.0475938	ILMN_1669142, ILMN_1803590, ILMN_1697639, ILMN_1655117, ILMN_1696654, ILMN_1795911, ILMN_1660810, ILMN_1799688, ILMN_1654488, ILMN_1762990	1199	76	19113	2.09747	1	0.842752	58.4377
UP_SEQ_FEATURE	repeat:TPR 3	15	1.24275	0.0509973	ILMN_1696375, ILMN_1731185, ILMN_1795911, ILMN_1660810, ILMN_1799688, ILMN_1685631, ILMN_1725840, ILMN_1803590, ILMN_1669142, ILMN_1697639, ILMN_1693227, ILMN_1696654, ILMN_1655117, ILMN_1654488, ILMN_1762990	1199	138	19113	1.73269	1	0.855823	61.0322
UP_SEQ_FEATURE	repeat:TPR 2	16	1.3256	0.0518566	ILMN_1696375, ILMN_1731185, ILMN_1795911, ILMN_1660810, ILMN_1799688, ILMN_1791656, ILMN_1685631, ILMN_1725840, ILMN_1803590, ILMN_1669142, ILMN_1697639, ILMN_1693227, ILMN_1696654, ILMN_1655117, ILMN_1654488, ILMN_1762990	1199	151	19113	1.68909	1	0.857185	61.6625
UP_SEQ_FEATURE	repeat:TPR 1	16	1.3256	0.0518566	ILMN_1696375, ILMN_1731185, ILMN_1795911, ILMN_1660810, ILMN_1799688, ILMN_1791656, ILMN_1685631, ILMN_1725840, ILMN_1803590, ILMN_1669142, ILMN_1697639, ILMN_1693227, ILMN_1696654, ILMN_1655117, ILMN_1654488, ILMN_1762990	1199	151	19113	1.68909	1	0.857185	61.6625
UP_SEQ_FEATURE	repeat:TPR 6	9	0.74565	0.061651	ILMN_1669142, ILMN_1697639, ILMN_1655117, ILMN_1696654, ILMN_1795911, ILMN_1660810, ILMN_1799688, ILMN_1654488, ILMN_1762990	1199	68	19113	2.10981	1	0.885496	68.1999
SP_PIR_KEYWORDS	tpr repeat	16	1.3256	0.0745931	ILMN_1696375, ILMN_1731185, ILMN_1795911, ILMN_1660810, ILMN_1799688, ILMN_1791656, ILMN_1685631, ILMN_1725840, ILMN_1803590, ILMN_1669142, ILMN_1697639, ILMN_1693227, ILMN_1696654, ILMN_1655117, ILMN_1654488, ILMN_1762990	1200	160	19235	1.60292	1	0.470856	66.9107
UP_SEQ_FEATURE	repeat:TPR 7	7	0.57995	0.163192	ILMN_1669142, ILMN_1697639, ILMN_1696654, ILMN_1795911, ILMN_1799688, ILMN_1654488, ILMN_1762990	1199	59	19113	1.89128	1	0.991855	95.9552
UP_SEQ_FEATURE	repeat:TPR 8	6	0.4971	0.18041	ILMN_1669142, ILMN_1697639, ILMN_1696654, ILMN_1795911, ILMN_1799688, ILMN_1654488	1199	48	19113	1.9926	1	0.994399	97.2181
INTERPRO	IPR001440:Tetratricopeptide TPR-1	9	0.74565	0.321859	ILMN_1725840, ILMN_1696375, ILMN_1697639, ILMN_1696654, ILMN_1795911, ILMN_1660810, ILMN_1799688, ILMN_1701262, ILMN_1654488	1081	100	16659	1.38697	1	0.997791	99.8353
INTERPRO	IPR019734:Tetratricopeptide repeat	10	0.8285	0.347501	ILMN_1725840, ILMN_1696375, ILMN_1669142, ILMN_1697639, ILMN_1696654, ILMN_1795911, ILMN_1660810, ILMN_1799688, ILMN_1701262, ILMN_1654488	1081	117	16659	1.31716	1	0.998606	99.9128
INTERPRO	IPR013026:Tetratricopeptide region	10	0.8285	0.384836	ILMN_1725840, ILMN_1696375, ILMN_1669142, ILMN_1803590, ILMN_1697639, ILMN_1696654, ILMN_1795911, ILMN_1660810, ILMN_1799688, ILMN_1654488	1081	121	16659	1.27361	1	0.999111	99.967
SMART	SM00028:TPR	10	0.8285	0.533824	ILMN_1725840, ILMN_1696375, ILMN_1669142, ILMN_1697639, ILMN_1696654, ILMN_1795911, ILMN_1660810, ILMN_1799688, ILMN_1701262, ILMN_1654488	696	116	9079	1.12453	1	0.990205	99.9962
UP_SEQ_FEATURE	repeat:TPR 9	3	0.24855	0.569021	ILMN_1697639, ILMN_1795911, ILMN_1799688	1199	30	19113	1.59408	1	1	100
Annotation Cluster 90	Enrichment Score: 0.9432349619223009
Category	Term	Count	%	PValue	Genes	List Total	Pop Hits	Pop Total	Fold Enrichment	Bonferroni	Benjamini	FDR
GOTERM_MF_FAT	GO:0042802~identical protein binding	56	4.6396	0.0335751	ILMN_1814173, ILMN_1686626, ILMN_1661491, ILMN_1778560, ILMN_1772521, ILMN_1676159, ILMN_1676010, ILMN_1774382, ILMN_1657893, ILMN_1712461, ILMN_1701855, ILMN_1811489, ILMN_1750256, ILMN_1684038, ILMN_1652163, ILMN_1696065, ILMN_1797189, ILMN_1797342, ILMN_1813846, ILMN_1711189, ILMN_1768273, ILMN_1714965, ILMN_1732705, ILMN_1674260, ILMN_1790595, ILMN_1735093, ILMN_1670796, ILMN_1741477, ILMN_17…	872	640	12983	1.30277	1	0.489675	41.0311
GOTERM_MF_FAT	GO:0046983~protein dimerization activity	44	3.6454	0.14117	ILMN_1761259, ILMN_1743784, ILMN_1670695, ILMN_1812795, ILMN_1721994, ILMN_1772521, ILMN_1777663, ILMN_1688964, ILMN_1654376, ILMN_1745365, ILMN_1676010, ILMN_1774382, ILMN_1735301, ILMN_1669425, ILMN_1728556, ILMN_1784467, ILMN_1707308, ILMN_1657893, ILMN_1712461, ILMN_1734867, ILMN_1763433, ILMN_1804735, ILMN_1750256, ILMN_1727142, ILMN_1768495, ILMN_1721138, ILMN_1767422, ILMN_1684038, ILMN_17…	872	542	12983	1.20868	1	0.828941	90.4968
GOTERM_MF_FAT	GO:0042803~protein homodimerization activity	26	2.1541	0.312275	ILMN_1761259, ILMN_1743784, ILMN_1812795, ILMN_1772521, ILMN_1721994, ILMN_1654376, ILMN_1774382, ILMN_1676010, ILMN_1735301, ILMN_1657893, ILMN_1734867, ILMN_1712461, ILMN_1804735, ILMN_1750256, ILMN_1763433, ILMN_1768495, ILMN_1721138, ILMN_1684038, ILMN_1705397, ILMN_1797189, ILMN_1680132, ILMN_1813846, ILMN_1714965, ILMN_1790595, ILMN_1735093, ILMN_1811933, ILMN_1729767, ILMN_1741477	872	334	12983	1.15901	1	0.958033	99.6941
Annotation Cluster 91	Enrichment Score: 0.9352227410567353
Category	Term	Count	%	PValue	Genes	List Total	Pop Hits	Pop Total	Fold Enrichment	Bonferroni	Benjamini	FDR
UP_SEQ_FEATURE	domain:Macro	3	0.24855	0.0667767	ILMN_1746171, ILMN_1786016, ILMN_1705570	1199	7	19113	6.83176	1	0.892165	71.1863
INTERPRO	IPR002589:Appr-1-p processing	3	0.24855	0.133743	ILMN_1746171, ILMN_1786016, ILMN_1705570	1081	10	16659	4.62322	1	0.960414	90.6436
SMART	SM00506:A1pp	3	0.24855	0.17516	ILMN_1746171, ILMN_1786016, ILMN_1705570	696	10	9079	3.91336	1	0.84196	92.3412
Annotation Cluster 92	Enrichment Score: 0.927164198500034
Category	Term	Count	%	PValue	Genes	List Total	Pop Hits	Pop Total	Fold Enrichment	Bonferroni	Benjamini	FDR
GOTERM_BP_FAT	GO:0030518~steroid hormone receptor signaling pathway	8	0.6628	0.0829259	ILMN_1741253, ILMN_1721729, ILMN_1795852, ILMN_1695797, ILMN_1718629, ILMN_1762085, ILMN_1797341, ILMN_1780598	886	58	13528	2.10602	1	0.806007	78.5849
UP_SEQ_FEATURE	short sequence motif:LXXLL motif 2	4	0.3314	0.141224	ILMN_1721729, ILMN_1695797, ILMN_1718629, ILMN_1698968	1199	21	19113	3.03634	1	0.984795	93.5505
UP_SEQ_FEATURE	short sequence motif:LXXLL motif 1	4	0.3314	0.141224	ILMN_1721729, ILMN_1695797, ILMN_1718629, ILMN_1698968	1199	21	19113	3.03634	1	0.984795	93.5505
Annotation Cluster 93	Enrichment Score: 0.9116193442664959
Category	Term	Count	%	PValue	Genes	List Total	Pop Hits	Pop Total	Fold Enrichment	Bonferroni	Benjamini	FDR
GOTERM_BP_FAT	GO:0034621~cellular macromolecular complex subunit organization	36	2.9826	0.0107731	ILMN_1673962, ILMN_1697286, ILMN_1666280, ILMN_1725121, ILMN_1745994, ILMN_1723117, ILMN_1681503, ILMN_1722423, ILMN_1797445, ILMN_1688638, ILMN_1727617, ILMN_1698441, ILMN_1692575, ILMN_1781516, ILMN_1701306, ILMN_1770206, ILMN_1705928, ILMN_1659523, ILMN_1656082, ILMN_1786893, ILMN_1746171, ILMN_1695706, ILMN_1799103, ILMN_1712560, ILMN_1751338, ILMN_1797341, ILMN_1734508, ILMN_1725840, ILMN_16…	886	357	13528	1.53969	1	0.303895	17.5373
GOTERM_BP_FAT	GO:0043933~macromolecular complex subunit organization	59	4.88815	0.0466505	ILMN_1771593, ILMN_1697286, ILMN_1754923, ILMN_1740216, ILMN_1745994, ILMN_1723117, ILMN_1681503, ILMN_1688638, ILMN_1698441, ILMN_1692575, ILMN_1701306, ILMN_1705928, ILMN_1746171, ILMN_1799103, ILMN_1741976, ILMN_1697117, ILMN_1751338, ILMN_1797341, ILMN_1813846, ILMN_1812559, ILMN_1680675, ILMN_1809890, ILMN_1762275, ILMN_1697469, ILMN_1705570, ILMN_1741477, ILMN_1664931, ILMN_1803110, ILMN_17…	886	710	13528	1.2688	1	0.669168	57.2787
GOTERM_BP_FAT	GO:0034622~cellular macromolecular complex assembly	27	2.23695	0.141523	ILMN_1673962, ILMN_1697286, ILMN_1666280, ILMN_1725121, ILMN_1745994, ILMN_1723117, ILMN_1722423, ILMN_1681503, ILMN_1797445, ILMN_1692575, ILMN_1698441, ILMN_1770206, ILMN_1705928, ILMN_1659523, ILMN_1656082, ILMN_1786893, ILMN_1746171, ILMN_1695706, ILMN_1799103, ILMN_1712560, ILMN_1762275, ILMN_1697469, ILMN_1705570, ILMN_1760143, ILMN_1729767, ILMN_1741477, ILMN_1788363, ILMN_1795341	886	318	13528	1.29639	1	0.91085	93.3896
GOTERM_BP_FAT	GO:0065003~macromolecular complex assembly	51	4.22535	0.17004	ILMN_1771593, ILMN_1697286, ILMN_1754923, ILMN_1740216, ILMN_1745994, ILMN_1723117, ILMN_1681503, ILMN_1698441, ILMN_1692575, ILMN_1705928, ILMN_1746171, ILMN_1799103, ILMN_1741976, ILMN_1697117, ILMN_1813846, ILMN_1812559, ILMN_1809890, ILMN_1762275, ILMN_1697469, ILMN_1705570, ILMN_1741477, ILMN_1664931, ILMN_1803110, ILMN_1788363, ILMN_1770579, ILMN_1673962, ILMN_1743784, ILMN_1702124, ILMN_16…	886	665	13528	1.17098	1	0.933763	96.3772
GOTERM_BP_FAT	GO:0006461~protein complex assembly	34	2.8169	0.529486	ILMN_1771593, ILMN_1770579, ILMN_1673962, ILMN_1743784, ILMN_1754923, ILMN_1702124, ILMN_1689445, ILMN_1666280, ILMN_1725121, ILMN_1695797, ILMN_1740216, ILMN_1745994, ILMN_1723117, ILMN_1710598, ILMN_1735301, ILMN_1797445, ILMN_1721729, ILMN_1797367, ILMN_1697117, ILMN_1741976, ILMN_1737535, ILMN_1684802, ILMN_1813846, ILMN_1812559, ILMN_1703324, ILMN_1769118, ILMN_1809890, ILMN_1713129, ILMN_17…	886	505	13528	1.02799	1	0.998534	99.9999
GOTERM_BP_FAT	GO:0070271~protein complex biogenesis	34	2.8169	0.529486	ILMN_1771593, ILMN_1770579, ILMN_1673962, ILMN_1743784, ILMN_1754923, ILMN_1702124, ILMN_1689445, ILMN_1666280, ILMN_1725121, ILMN_1695797, ILMN_1740216, ILMN_1745994, ILMN_1723117, ILMN_1710598, ILMN_1735301, ILMN_1797445, ILMN_1721729, ILMN_1797367, ILMN_1697117, ILMN_1741976, ILMN_1737535, ILMN_1684802, ILMN_1813846, ILMN_1812559, ILMN_1703324, ILMN_1769118, ILMN_1809890, ILMN_1713129, ILMN_17…	886	505	13528	1.02799	1	0.998534	99.9999
Annotation Cluster 94	Enrichment Score: 0.9019374365803249
Category	Term	Count	%	PValue	Genes	List Total	Pop Hits	Pop Total	Fold Enrichment	Bonferroni	Benjamini	FDR
BIOCARTA	h_tnfr2Pathway:TNFR2 Signaling Pathway	6	0.4971	0.00791032	ILMN_1714965, ILMN_1809890, ILMN_1657937, ILMN_1707308, ILMN_1715069, ILMN_1727142	114	17	1437	4.44892	0.732419	0.482718	9.19889
PUBMED_ID	17244613	3	0.24855	0.010875	ILMN_1714965, ILMN_1707308, ILMN_1727142	1207	4	27491	17.0822	1	0.85725	21.114
PUBMED_ID	14585847	3	0.24855	0.010875	ILMN_1714965, ILMN_1707308, ILMN_1727142	1207	4	27491	17.0822	1	0.85725	21.114
PUBMED_ID	18715846	3	0.24855	0.0175997	ILMN_1714965, ILMN_1813489, ILMN_1769031	1207	5	27491	13.6658	1	0.942957	31.9638
PUBMED_ID	12133833	3	0.24855	0.0256374	ILMN_1707308, ILMN_1715069, ILMN_1727142	1207	6	27491	11.3882	1	0.97955	43.0683
PUBMED_ID	18434448	4	0.3314	0.0307495	ILMN_1714965, ILMN_1809890, ILMN_1717313, ILMN_1727142	1207	16	27491	5.69408	1	0.98963	49.2072
KEGG_PATHWAY	hsa05220:Chronic myeloid leukemia	10	0.8285	0.0341498	ILMN_1777783, ILMN_1691294, ILMN_1690122, ILMN_1714965, ILMN_1685580, ILMN_1707308, ILMN_1689001, ILMN_1741477, ILMN_1813489, ILMN_1727142	306	75	5085	2.21569	0.996013	0.545811	34.2369
PUBMED_ID	15802604	3	0.24855	0.0348601	ILMN_1714965, ILMN_1707308, ILMN_1727142	1207	7	27491	9.76127	1	0.99349	53.68
BIOCARTA	h_stressPathway:TNF/Stress Related Signaling	6	0.4971	0.0348739	ILMN_1714965, ILMN_1657937, ILMN_1707308, ILMN_1736568, ILMN_1715069, ILMN_1727142	114	24	1437	3.15132	0.99724	0.692255	35.0343
PUBMED_ID	14585990	3	0.24855	0.0451486	ILMN_1657937, ILMN_1707308, ILMN_1727142	1207	8	27491	8.54111	1	0.998277	63.2874
KEGG_PATHWAY	hsa05221:Acute myeloid leukemia	8	0.6628	0.0567008	ILMN_1777783, ILMN_1714965, ILMN_1812795, ILMN_1707308, ILMN_1761175, ILMN_1813489, ILMN_1727142, ILMN_1769031	306	58	5085	2.29209	0.999907	0.6047	50.5435
PUBMED_ID	10723127	3	0.24855	0.0684861	ILMN_1714965, ILMN_1707308, ILMN_1727142	1207	10	27491	6.83289	1	0.99985	78.5351
KEGG_PATHWAY	hsa04210:Apoptosis	10	0.8285	0.0751743	ILMN_1690546, ILMN_1714965, ILMN_1678962, ILMN_1756787, ILMN_1738523, ILMN_1657937, ILMN_1707308, ILMN_1659463, ILMN_1789830, ILMN_1727142	306	87	5085	1.91007	0.999996	0.615509	61.0402
PUBMED_ID	18990758	3	0.24855	0.0813355	ILMN_1714965, ILMN_1657937, ILMN_1727142	1207	11	27491	6.21172	1	0.999952	84.1186
BIOCARTA	h_nfkbPathway:NF-kB Signaling Pathway	5	0.41425	0.0880308	ILMN_1714965, ILMN_1738523, ILMN_1657937, ILMN_1707308, ILMN_1727142	114	22	1437	2.86483	1	0.751077	67.3617
BIOCARTA	h_cd40Pathway:CD40L Signaling Pathway	4	0.3314	0.0911188	ILMN_1714965, ILMN_1809890, ILMN_1707308, ILMN_1727142	114	14	1437	3.6015	1	0.733305	68.6795
BIOCARTA	h_nthiPathway:NFkB activation by Nontypeable Hemophilus influenzae	5	0.41425	0.113473	ILMN_1714965, ILMN_1738523, ILMN_1741477, ILMN_1762085, ILMN_1727142	114	24	1437	2.6261	1	0.760242	76.8573
KEGG_PATHWAY	hsa04662:B cell receptor signaling pathway	8	0.6628	0.161207	ILMN_1690546, ILMN_1714965, ILMN_1781155, ILMN_1685810, ILMN_1707308, ILMN_1800976, ILMN_1717313, ILMN_1813489, ILMN_1727142	306	75	5085	1.77255	1	0.806826	88.0015
KEGG_PATHWAY	hsa04920:Adipocytokine signaling pathway	7	0.57995	0.2118	ILMN_1714965, ILMN_1751871, ILMN_1707308, ILMN_1717313, ILMN_1786021, ILMN_1727142, ILMN_1769031	306	67	5085	1.73617	1	0.80705	94.3345
GOTERM_BP_FAT	GO:0007249~I-kappaB kinase/NF-kappaB cascade	7	0.57995	0.228842	ILMN_1809890, ILMN_1657937, ILMN_1707308, ILMN_1715069, ILMN_1776703, ILMN_1686454, ILMN_1727142	886	63	13528	1.69651	1	0.969873	99.0207
KEGG_PATHWAY	hsa05215:Prostate cancer	8	0.6628	0.284479	ILMN_1714965, ILMN_1707308, ILMN_1795852, ILMN_1688964, ILMN_1813489, ILMN_1701134, ILMN_1727142, ILMN_1769031	306	89	5085	1.49372	1	0.850561	98.2361
KEGG_PATHWAY	hsa04660:T cell receptor signaling pathway	9	0.74565	0.320619	ILMN_1690546, ILMN_1714965, ILMN_1685580, ILMN_1685810, ILMN_1707308, ILMN_1689001, ILMN_1800976, ILMN_1717313, ILMN_1813489, ILMN_1727142	306	108	5085	1.3848	1	0.871115	99.056
BIOCARTA	h_tollPathway:Toll-Like Receptor Pathway	5	0.41425	0.331006	ILMN_1714965, ILMN_1738523, ILMN_1707308, ILMN_1776703, ILMN_1727142	114	37	1437	1.70341	1	0.937984	99.2436
BIOCARTA	h_keratinocytePathway:Keratinocyte Differentiation	5	0.41425	0.349585	ILMN_1676010, ILMN_1714965, ILMN_1657937, ILMN_1813489, ILMN_1727142	114	38	1437	1.65859	1	0.935835	99.4628
KEGG_PATHWAY	hsa05120:Epithelial cell signaling in Helicobacter pylori infection	6	0.4971	0.386971	ILMN_1714965, ILMN_1781155, ILMN_1756787, ILMN_1707308, ILMN_1727142, ILMN_1654541	306	68	5085	1.46626	1	0.905367	99.7267
KEGG_PATHWAY	hsa04623:Cytosolic DNA-sensing pathway	5	0.41425	0.421727	ILMN_1714965, ILMN_1767422, ILMN_1657937, ILMN_1707308, ILMN_1727142	306	55	5085	1.5107	1	0.898909	99.8648
KEGG_PATHWAY	hsa05212:Pancreatic cancer	6	0.4971	0.435391	ILMN_1714965, ILMN_1707308, ILMN_1689001, ILMN_1741477, ILMN_1813489, ILMN_1727142	306	72	5085	1.3848	1	0.902749	99.8987
PUBMED_ID	12482669	3	0.24855	0.515209	ILMN_1690546, ILMN_1714965, ILMN_1685810, ILMN_1800976	1207	39	27491	1.75202	1	1	100
KEGG_PATHWAY	hsa04622:RIG-I-like receptor signaling pathway	5	0.41425	0.624039	ILMN_1714965, ILMN_1657937, ILMN_1707308, ILMN_1715069, ILMN_1727142	306	71	5085	1.17026	1	0.946859	99.9992
BIOCARTA	h_gsk3Pathway:Inactivation of Gsk3 by AKT causes accumulation of b-catenin in Alveolar Macrophages	3	0.24855	0.679755	ILMN_1714965, ILMN_1738523, ILMN_1776703	114	29	1437	1.30399	1	0.997279	99.9999
BIOCARTA	h_il1rPathway:Signal transduction through IL1R	3	0.24855	0.679755	ILMN_1714965, ILMN_1738523, ILMN_1727142	114	29	1437	1.30399	1	0.997279	99.9999
KEGG_PATHWAY	hsa04621:NOD-like receptor signaling pathway	4	0.3314	0.728369	ILMN_1714965, ILMN_1707308, ILMN_1727142, ILMN_1654376	306	62	5085	1.07211	1	0.975288	100
KEGG_PATHWAY	hsa04620:Toll-like receptor signaling pathway	6	0.4971	0.733667	ILMN_1714965, ILMN_1738523, ILMN_1657937, ILMN_1707308, ILMN_1776703, ILMN_1727142	306	101	5085	0.987187	1	0.97504	100
KEGG_PATHWAY	hsa04062:Chemokine signaling pathway	9	0.74565	0.882481	ILMN_1777783, ILMN_1690122, ILMN_1714965, ILMN_1781155, ILMN_1707308, ILMN_1681703, ILMN_1692527, ILMN_1813489, ILMN_1727142	306	187	5085	0.79978	1	0.993788	100
Annotation Cluster 95	Enrichment Score: 0.8972394766072114
Category	Term	Count	%	PValue	Genes	List Total	Pop Hits	Pop Total	Fold Enrichment	Bonferroni	Benjamini	FDR
GOTERM_CC_FAT	GO:0014731~spectrin-associated cytoskeleton	3	0.24855	0.0276122	ILMN_1684694, ILMN_1667408, ILMN_1663106	712	5	12782	10.7713	0.999998	0.263173	32.9405
SP_PIR_KEYWORDS	elliptocytosis	3	0.24855	0.0846019	ILMN_1684694, ILMN_1667408, ILMN_1663106	1200	8	19235	6.01094	1	0.492464	71.6658
SP_PIR_KEYWORDS	hereditary hemolytic anemia	4	0.3314	0.125092	ILMN_1684694, ILMN_1667408, ILMN_1663106, ILMN_1659727	1200	20	19235	3.20583	1	0.606809	85.1403
GOTERM_MF_FAT	GO:0005200~structural constituent of cytoskeleton	4	0.3314	0.881723	ILMN_1657164, ILMN_1684694, ILMN_1667408, ILMN_1663106, ILMN_1692973	872	74	12983	0.804798	1	0.999967	100
Annotation Cluster 96	Enrichment Score: 0.8935519158174273
Category	Term	Count	%	PValue	Genes	List Total	Pop Hits	Pop Total	Fold Enrichment	Bonferroni	Benjamini	FDR
UP_SEQ_FEATURE	domain:BTB	15	1.24275	0.0619057	ILMN_1710092, ILMN_1737314, ILMN_1689456, ILMN_1735364, ILMN_1772522, ILMN_1670695, ILMN_1731044, ILMN_1731113, ILMN_1652040, ILMN_1674260, ILMN_1770641, ILMN_1757262, ILMN_1792666, ILMN_1801464, ILMN_1756525, ILMN_1732885	1199	142	19113	1.68389	1	0.883741	68.3549
INTERPRO	IPR000210:BTB/POZ-like	17	1.40845	0.119756	ILMN_1710092, ILMN_1737314, ILMN_1668586, ILMN_1689456, ILMN_1735364, ILMN_1772522, ILMN_1670695, ILMN_1731044, ILMN_1731113, ILMN_1652040, ILMN_1687743, ILMN_1674260, ILMN_1770641, ILMN_1757262, ILMN_1792666, ILMN_1801464, ILMN_1756525, ILMN_1732885	1081	179	16659	1.46359	1	0.950829	87.8129
INTERPRO	IPR013069:BTB/POZ	13	1.07705	0.121332	ILMN_1710092, ILMN_1737314, ILMN_1689456, ILMN_1735364, ILMN_1772522, ILMN_1670695, ILMN_1731113, ILMN_1687743, ILMN_1770641, ILMN_1757262, ILMN_1792666, ILMN_1801464, ILMN_1756525, ILMN_1732885	1081	127	16659	1.57748	1	0.950447	88.1681
INTERPRO	IPR011333:BTB/POZ fold	17	1.40845	0.128334	ILMN_1710092, ILMN_1737314, ILMN_1668586, ILMN_1689456, ILMN_1735364, ILMN_1772522, ILMN_1670695, ILMN_1731044, ILMN_1731113, ILMN_1652040, ILMN_1687743, ILMN_1674260, ILMN_1770641, ILMN_1757262, ILMN_1792666, ILMN_1801464, ILMN_1756525, ILMN_1732885	1081	181	16659	1.44742	1	0.956677	89.6314
SMART	SM00225:BTB	17	1.40845	0.29505	ILMN_1710092, ILMN_1737314, ILMN_1668586, ILMN_1689456, ILMN_1735364, ILMN_1772522, ILMN_1670695, ILMN_1731044, ILMN_1731113, ILMN_1652040, ILMN_1687743, ILMN_1674260, ILMN_1770641, ILMN_1757262, ILMN_1792666, ILMN_1801464, ILMN_1756525, ILMN_1732885	696	179	9079	1.23887	1	0.944114	99.058
Annotation Cluster 97	Enrichment Score: 0.8873274300615877
Category	Term	Count	%	PValue	Genes	List Total	Pop Hits	Pop Total	Fold Enrichment	Bonferroni	Benjamini	FDR
PUBMED_ID	12791985	5	0.41425	0.0499779	ILMN_1681503, ILMN_1659364, ILMN_1741801, ILMN_1724489, ILMN_1806818	1207	32	27491	3.5588	1	0.999003	67.1108
PUBMED_ID	10846177	3	0.24855	0.0563917	ILMN_1681503, ILMN_1741801, ILMN_1806818	1207	9	27491	7.5921	1	0.999476	71.6049
PUBMED_ID	15232106	4	0.3314	0.142856	ILMN_1681503, ILMN_1689001, ILMN_1741801, ILMN_1806818	1207	30	27491	3.03684	1	1	96.4684
PUBMED_ID	12614612	3	0.24855	0.201832	ILMN_1681503, ILMN_1741801, ILMN_1806818	1207	19	27491	3.59626	1	1	99.2476
PUBMED_ID	15226314	3	0.24855	0.218144	ILMN_1681503, ILMN_1741801, ILMN_1806818	1207	20	27491	3.41645	1	1	99.5192
PUBMED_ID	15707391	3	0.24855	0.267555	ILMN_1681503, ILMN_1741801, ILMN_1806818	1207	23	27491	2.97082	1	1	99.8833
Annotation Cluster 98	Enrichment Score: 0.8867803744510668
Category	Term	Count	%	PValue	Genes	List Total	Pop Hits	Pop Total	Fold Enrichment	Bonferroni	Benjamini	FDR
UP_SEQ_FEATURE	domain:LisH	5	0.41425	0.0950434	ILMN_1772165, ILMN_1720188, ILMN_1742578, ILMN_1667306, ILMN_1684802	1199	28	19113	2.84657	1	0.946836	83.4387
INTERPRO	IPR006594:LisH dimerisation motif	5	0.41425	0.10441	ILMN_1772165, ILMN_1720188, ILMN_1742578, ILMN_1667306, ILMN_1684802	1081	28	16659	2.75192	1	0.929236	83.791
UP_SEQ_FEATURE	domain:CTLH	3	0.24855	0.126465	ILMN_1720188, ILMN_1742578, ILMN_1667306	1199	10	19113	4.78224	1	0.978133	91.2347
INTERPRO	IPR006595:CTLH, C-terminal to LisH motif	3	0.24855	0.133743	ILMN_1720188, ILMN_1742578, ILMN_1667306	1081	10	16659	4.62322	1	0.960414	90.6436
SMART	SM00667:LisH	5	0.41425	0.162546	ILMN_1772165, ILMN_1720188, ILMN_1742578, ILMN_1667306, ILMN_1684802	696	28	9079	2.32938	1	0.827292	90.6222
SMART	SM00668:CTLH	3	0.24855	0.17516	ILMN_1720188, ILMN_1742578, ILMN_1667306	696	10	9079	3.91336	1	0.84196	92.3412
Annotation Cluster 99	Enrichment Score: 0.8783317884239756
Category	Term	Count	%	PValue	Genes	List Total	Pop Hits	Pop Total	Fold Enrichment	Bonferroni	Benjamini	FDR
UP_SEQ_FEATURE	domain:FATC	3	0.24855	0.0497269	ILMN_1801383, ILMN_1660368, ILMN_1769031	1199	6	19113	7.97039	1	0.852039	60.0821
UP_SEQ_FEATURE	domain:FAT	3	0.24855	0.0497269	ILMN_1801383, ILMN_1660368, ILMN_1769031	1199	6	19113	7.97039	1	0.852039	60.0821
INTERPRO	IPR014009:PIK-related kinase	3	0.24855	0.0528822	ILMN_1801383, ILMN_1660368, ILMN_1769031	1081	6	16659	7.70537	1	0.785568	59.2016
INTERPRO	IPR003152:PIK-related kinase, FATC	3	0.24855	0.0528822	ILMN_1801383, ILMN_1660368, ILMN_1769031	1081	6	16659	7.70537	1	0.785568	59.2016
UP_SEQ_FEATURE	domain:PI3K/PI4K	3	0.24855	0.312734	ILMN_1801383, ILMN_1660368, ILMN_1769031	1199	18	19113	2.6568	1	0.999758	99.8832
INTERPRO	IPR000403:Phosphatidylinositol 3- and 4-kinase, catalytic	3	0.24855	0.32736	ILMN_1801383, ILMN_1660368, ILMN_1769031	1081	18	16659	2.56846	1	0.997919	99.856
INTERPRO	IPR018936:Phosphatidylinositol 3- and 4-kinase, conserved site	3	0.24855	0.32736	ILMN_1801383, ILMN_1660368, ILMN_1769031	1081	18	16659	2.56846	1	0.997919	99.856
SMART	SM00146:PI3Kc	3	0.24855	0.405804	ILMN_1801383, ILMN_1660368, ILMN_1769031	696	18	9079	2.17409	1	0.979038	99.9037
Annotation Cluster 100	Enrichment Score: 0.8766175279993662
Category	Term	Count	%	PValue	Genes	List Total	Pop Hits	Pop Total	Fold Enrichment	Bonferroni	Benjamini	FDR
GOTERM_BP_FAT	GO:0060606~tube closure	7	0.57995	0.0118142	ILMN_1696339, ILMN_1797367, ILMN_1715647, ILMN_1659463, ILMN_1652163, ILMN_1800331, ILMN_1765574	886	30	13528	3.56268	1	0.321515	19.0687
GOTERM_BP_FAT	GO:0001843~neural tube closure	7	0.57995	0.0118142	ILMN_1696339, ILMN_1797367, ILMN_1715647, ILMN_1659463, ILMN_1652163, ILMN_1800331, ILMN_1765574	886	30	13528	3.56268	1	0.321515	19.0687
GOTERM_BP_FAT	GO:0014020~primary neural tube formation	7	0.57995	0.0186653	ILMN_1696339, ILMN_1797367, ILMN_1715647, ILMN_1659463, ILMN_1652163, ILMN_1800331, ILMN_1765574	886	33	13528	3.2388	1	0.422381	28.4963
GOTERM_BP_FAT	GO:0001841~neural tube formation	7	0.57995	0.0440517	ILMN_1696339, ILMN_1797367, ILMN_1715647, ILMN_1659463, ILMN_1652163, ILMN_1800331, ILMN_1765574	886	40	13528	2.67201	1	0.660417	55.1573
GOTERM_BP_FAT	GO:0001838~embryonic epithelial tube formation	7	0.57995	0.0594325	ILMN_1696339, ILMN_1797367, ILMN_1715647, ILMN_1659463, ILMN_1652163, ILMN_1800331, ILMN_1765574	886	43	13528	2.48559	1	0.734962	66.4041
GOTERM_BP_FAT	GO:0035148~tube lumen formation	7	0.57995	0.0651867	ILMN_1696339, ILMN_1797367, ILMN_1715647, ILMN_1659463, ILMN_1652163, ILMN_1800331, ILMN_1765574	886	44	13528	2.4291	1	0.754556	69.8809
GOTERM_BP_FAT	GO:0060562~epithelial tube morphogenesis	9	0.74565	0.0699672	ILMN_1696339, ILMN_1797367, ILMN_1715647, ILMN_1659463, ILMN_1741477, ILMN_1652163, ILMN_1800331, ILMN_1773567, ILMN_1765574	886	67	13528	2.05101	1	0.771777	72.5082
GOTERM_BP_FAT	GO:0016331~morphogenesis of embryonic epithelium	8	0.6628	0.0829259	ILMN_1696339, ILMN_1797367, ILMN_1715647, ILMN_1659463, ILMN_1652163, ILMN_1800331, ILMN_1773567, ILMN_1765574	886	58	13528	2.10602	1	0.806007	78.5849
GOTERM_BP_FAT	GO:0002009~morphogenesis of an epithelium	11	0.91135	0.123902	ILMN_1696339, ILMN_1792597, ILMN_1797367, ILMN_1715647, ILMN_1735093, ILMN_1659463, ILMN_1741477, ILMN_1652163, ILMN_1800331, ILMN_1773567, ILMN_1765574	886	101	13528	1.66292	1	0.890516	90.5089
GOTERM_BP_FAT	GO:0021915~neural tube development	8	0.6628	0.155165	ILMN_1696339, ILMN_1797367, ILMN_1715647, ILMN_1659463, ILMN_1652163, ILMN_1800331, ILMN_1765574, ILMN_1789905	886	68	13528	1.79631	1	0.92206	95.0296
GOTERM_BP_FAT	GO:0060429~epithelium development	18	1.4913	0.316773	ILMN_1696339, ILMN_1814173, ILMN_1792597, ILMN_1705310, ILMN_1756787, ILMN_1797367, ILMN_1652163, ILMN_1773567, ILMN_1765574, ILMN_1747146, ILMN_1727524, ILMN_1789905, ILMN_1761828, ILMN_1715647, ILMN_1735093, ILMN_1659463, ILMN_1741477, ILMN_1800331	886	227	13528	1.21073	1	0.988298	99.8865
GOTERM_BP_FAT	GO:0035239~tube morphogenesis	11	0.91135	0.318719	ILMN_1793885, ILMN_1696339, ILMN_1797367, ILMN_1715647, ILMN_1735093, ILMN_1659463, ILMN_1741477, ILMN_1652163, ILMN_1800331, ILMN_1773567, ILMN_1765574	886	127	13528	1.32248	1	0.988462	99.8921
GOTERM_BP_FAT	GO:0035295~tube development	17	1.40845	0.367192	ILMN_1793885, ILMN_1696339, ILMN_1797367, ILMN_1687567, ILMN_1652163, ILMN_1773567, ILMN_1765574, ILMN_1676010, ILMN_1715647, ILMN_1735093, ILMN_1688633, ILMN_1659463, ILMN_1741477, ILMN_1721729, ILMN_1800331, ILMN_1762531, ILMN_1778991	886	220	13528	1.17985	1	0.993251	99.971
GOTERM_BP_FAT	GO:0048729~tissue morphogenesis	14	1.1599	0.397229	ILMN_1696339, ILMN_1814173, ILMN_1792597, ILMN_1761259, ILMN_1797367, ILMN_1652163, ILMN_1773567, ILMN_1765574, ILMN_1715647, ILMN_1815941, ILMN_1735093, ILMN_1741477, ILMN_1659463, ILMN_1800331	886	180	13528	1.18756	1	0.995479	99.9878
GOTERM_BP_FAT	GO:0048598~embryonic morphogenesis	21	1.73985	0.541514	ILMN_1747419, ILMN_1696339, ILMN_1814173, ILMN_1761259, ILMN_1707175, ILMN_1797367, ILMN_1778930, ILMN_1652163, ILMN_1773567, ILMN_1765574, ILMN_1716480, ILMN_1710598, ILMN_1676010, ILMN_1715647, ILMN_1669425, ILMN_1659463, ILMN_1669555, ILMN_1741477, ILMN_1721729, ILMN_1802376, ILMN_1800331, ILMN_1762531	886	307	13528	1.04443	1	0.99867	99.9999
GOTERM_BP_FAT	GO:0001701~in utero embryonic development	11	0.91135	0.722524	ILMN_1725840, ILMN_1747419, ILMN_1814173, ILMN_1676010, ILMN_1736048, ILMN_1672357, ILMN_1679051, ILMN_1721729, ILMN_1778930, ILMN_1695797, ILMN_1750256	886	176	13528	0.954289	1	0.999823	100
GOTERM_BP_FAT	GO:0043009~chordate embryonic development	20	1.657	0.756261	ILMN_1747419, ILMN_1696339, ILMN_1814173, ILMN_1797367, ILMN_1778930, ILMN_1695797, ILMN_1652163, ILMN_1765574, ILMN_1789905, ILMN_1725840, ILMN_1676010, ILMN_1672357, ILMN_1736048, ILMN_1715647, ILMN_1679051, ILMN_1659463, ILMN_1721729, ILMN_1800331, ILMN_1762531, ILMN_1750256	886	331	13528	0.922575	1	0.999898	100
GOTERM_BP_FAT	GO:0009792~embryonic development ending in birth or egg hatching	20	1.657	0.769512	ILMN_1747419, ILMN_1696339, ILMN_1814173, ILMN_1797367, ILMN_1778930, ILMN_1695797, ILMN_1652163, ILMN_1765574, ILMN_1789905, ILMN_1725840, ILMN_1676010, ILMN_1672357, ILMN_1736048, ILMN_1715647, ILMN_1679051, ILMN_1659463, ILMN_1721729, ILMN_1800331, ILMN_1762531, ILMN_1750256	886	334	13528	0.914289	1	0.999919	100
Annotation Cluster 101	Enrichment Score: 0.874211274778964
Category	Term	Count	%	PValue	Genes	List Total	Pop Hits	Pop Total	Fold Enrichment	Bonferroni	Benjamini	FDR
GOTERM_BP_FAT	GO:0022415~viral reproductive process	9	0.74565	0.0480195	ILMN_1691294, ILMN_1758823, ILMN_1732705, ILMN_1686626, ILMN_1663061, ILMN_1758049, ILMN_1695726, ILMN_1747146, ILMN_1802157	886	62	13528	2.21641	1	0.67689	58.3578
GOTERM_BP_FAT	GO:0019079~viral genome replication	4	0.3314	0.0825922	ILMN_1691294, ILMN_1758823, ILMN_1663061, ILMN_1758049	886	16	13528	3.81716	1	0.806898	78.4458
GOTERM_BP_FAT	GO:0016032~viral reproduction	9	0.74565	0.0913093	ILMN_1691294, ILMN_1758823, ILMN_1732705, ILMN_1686626, ILMN_1663061, ILMN_1758049, ILMN_1695726, ILMN_1747146, ILMN_1802157	886	71	13528	1.93546	1	0.830793	81.8147
GOTERM_BP_FAT	GO:0019058~viral infectious cycle	5	0.41425	0.309352	ILMN_1691294, ILMN_1758823, ILMN_1663061, ILMN_1758049, ILMN_1747146	886	43	13528	1.77542	1	0.987455	99.8625
GOTERM_BP_FAT	GO:0019048~virus-host interaction	3	0.24855	0.379855	ILMN_1686626, ILMN_1695726, ILMN_1802157	886	20	13528	2.29029	1	0.99424	99.9798
Annotation Cluster 102	Enrichment Score: 0.8587680150880621
Category	Term	Count	%	PValue	Genes	List Total	Pop Hits	Pop Total	Fold Enrichment	Bonferroni	Benjamini	FDR
BIOCARTA	h_igf1mtorpathway:Skeletal muscle hypertrophy is regulated via AKT/mTOR pathway	6	0.4971	0.0294031	ILMN_1798014, ILMN_1665717, ILMN_1688534, ILMN_1705397, ILMN_1701134, ILMN_1769031	114	23	1437	3.28833	0.992946	0.710189	30.4155
BIOCARTA	h_mTORPathway:mTOR Signaling Pathway	5	0.41425	0.156891	ILMN_1655497, ILMN_1797367, ILMN_1705397, ILMN_1701134, ILMN_1769031	114	27	1437	2.33431	1	0.829768	87.4273
BIOCARTA	h_eif4Pathway:Regulation of eIF4e and p70 S6 Kinase	3	0.24855	0.575048	ILMN_1705397, ILMN_1701134, ILMN_1769031	114	24	1437	1.57566	1	0.99122	99.997
Annotation Cluster 103	Enrichment Score: 0.8582701746334016
Category	Term	Count	%	PValue	Genes	List Total	Pop Hits	Pop Total	Fold Enrichment	Bonferroni	Benjamini	FDR
PUBMED_ID	8800208	3	0.24855	0.138589	ILMN_1676010, ILMN_1689445, ILMN_1762085	1207	15	27491	4.55526	1	1	96.0669
PUBMED_ID	12634356	3	0.24855	0.138589	ILMN_1676010, ILMN_1689445, ILMN_1762085	1207	15	27491	4.55526	1	1	96.0669
PUBMED_ID	12642036	3	0.24855	0.138589	ILMN_1676010, ILMN_1689445, ILMN_1762085	1207	15	27491	4.55526	1	1	96.0669
Annotation Cluster 104	Enrichment Score: 0.8257265587695192
Category	Term	Count	%	PValue	Genes	List Total	Pop Hits	Pop Total	Fold Enrichment	Bonferroni	Benjamini	FDR
KEGG_PATHWAY	hsa03410:Base excision repair	7	0.57995	0.0164407	ILMN_1777096, ILMN_1812622, ILMN_1767894, ILMN_1714438, ILMN_1708764, ILMN_1785198, ILMN_1775885	306	35	5085	3.32353	0.928338	0.482605	18.1232
GOTERM_BP_FAT	GO:0006304~DNA modification	7	0.57995	0.0186653	ILMN_1777096, ILMN_1714438, ILMN_1688638, ILMN_1708764, ILMN_1783606, ILMN_1769606, ILMN_1760201	886	33	13528	3.2388	1	0.422381	28.4963
GOTERM_BP_FAT	GO:0006284~base-excision repair	6	0.4971	0.0287146	ILMN_1777096, ILMN_1812622, ILMN_1767894, ILMN_1714438, ILMN_1708764, ILMN_1775885	886	27	13528	3.39303	1	0.528426	40.4684
PUBMED_ID	10583946	5	0.41425	0.0326158	ILMN_1777096, ILMN_1763575, ILMN_1714438, ILMN_1708764, ILMN_1740216	1207	28	27491	4.0672	1	0.991577	51.2867
GOTERM_BP_FAT	GO:0006285~base-excision repair, AP site formation	3	0.24855	0.0920152	ILMN_1777096, ILMN_1714438, ILMN_1708764	886	8	13528	5.72573	1	0.829129	82.0646
GOTERM_BP_FAT	GO:0009264~deoxyribonucleotide catabolic process	3	0.24855	0.232089	ILMN_1777096, ILMN_1714438, ILMN_1708764	886	14	13528	3.27185	1	0.971032	99.0916
GOTERM_BP_FAT	GO:0009166~nucleotide catabolic process	6	0.4971	0.23954	ILMN_1777096, ILMN_1749131, ILMN_1714438, ILMN_1708764, ILMN_1745470, ILMN_1740216	886	51	13528	1.79631	1	0.97318	99.2363
GOTERM_BP_FAT	GO:0009262~deoxyribonucleotide metabolic process	4	0.3314	0.25804	ILMN_1771593, ILMN_1777096, ILMN_1714438, ILMN_1708764	886	27	13528	2.26202	1	0.977936	99.5074
GOTERM_BP_FAT	GO:0034656~nucleobase, nucleoside and nucleotide catabolic process	6	0.4971	0.329488	ILMN_1777096, ILMN_1749131, ILMN_1714438, ILMN_1708764, ILMN_1745470, ILMN_1740216	886	58	13528	1.57951	1	0.989631	99.9188
GOTERM_BP_FAT	GO:0034655~nucleobase, nucleoside, nucleotide and nucleic acid catabolic process	6	0.4971	0.329488	ILMN_1777096, ILMN_1749131, ILMN_1714438, ILMN_1708764, ILMN_1745470, ILMN_1740216	886	58	13528	1.57951	1	0.989631	99.9188
GOTERM_BP_FAT	GO:0009394~2'-deoxyribonucleotide metabolic process	3	0.24855	0.403544	ILMN_1777096, ILMN_1714438, ILMN_1708764	886	21	13528	2.18123	1	0.995506	99.9899
GOTERM_BP_FAT	GO:0044270~nitrogen compound catabolic process	6	0.4971	0.448198	ILMN_1777096, ILMN_1749131, ILMN_1714438, ILMN_1708764, ILMN_1745470, ILMN_1740216	886	67	13528	1.36734	1	0.997017	99.9975
GOTERM_BP_FAT	GO:0046700~heterocycle catabolic process	6	0.4971	0.572665	ILMN_1777096, ILMN_1788239, ILMN_1714438, ILMN_1708764, ILMN_1745470, ILMN_1740216	886	77	13528	1.18976	1	0.999009	100
GOTERM_BP_FAT	GO:0006195~purine nucleotide catabolic process	3	0.24855	0.64539	ILMN_1714438, ILMN_1745470, ILMN_1740216	886	33	13528	1.38806	1	0.999564	100
Annotation Cluster 105	Enrichment Score: 0.81687349992535
Category	Term	Count	%	PValue	Genes	List Total	Pop Hits	Pop Total	Fold Enrichment	Bonferroni	Benjamini	FDR
BIOCARTA	h_g1Pathway:Cell Cycle: G1/S Check Point	6	0.4971	0.0712596	ILMN_1772165, ILMN_1661717, ILMN_1665538, ILMN_1795852, ILMN_1689001, ILMN_1741477	114	29	1437	2.60799	0.999995	0.744242	59.2722
BIOCARTA	h_skp2e2fPathway:E2F1 Destruction Pathway	3	0.24855	0.182478	ILMN_1661717, ILMN_1665538, ILMN_1795852	114	10	1437	3.78158	1	0.844027	91.3544
BIOCARTA	h_p27Pathway:Regulation of p27 Phosphorylation during Cell Cycle Progression	3	0.24855	0.272474	ILMN_1661717, ILMN_1665538, ILMN_1795852	114	13	1437	2.90891	1	0.909304	97.9042
Annotation Cluster 106	Enrichment Score: 0.7718994166468842
Category	Term	Count	%	PValue	Genes	List Total	Pop Hits	Pop Total	Fold Enrichment	Bonferroni	Benjamini	FDR
BIOCARTA	h_g1Pathway:Cell Cycle: G1/S Check Point	6	0.4971	0.0712596	ILMN_1772165, ILMN_1661717, ILMN_1665538, ILMN_1795852, ILMN_1689001, ILMN_1741477	114	29	1437	2.60799	0.999995	0.744242	59.2722
BIOCARTA	h_RacCycDPathway:Influence of Ras and Rho proteins on G1 to S Transition	5	0.41425	0.113473	ILMN_1661717, ILMN_1714965, ILMN_1795852, ILMN_1689001, ILMN_1813489	114	24	1437	2.6261	1	0.760242	76.8573
BIOCARTA	h_cellcyclePathway:Cyclins and Cell Cycle Regulation	3	0.24855	0.597811	ILMN_1661717, ILMN_1795852, ILMN_1689001	114	25	1437	1.51263	1	0.992383	99.9984
Annotation Cluster 107	Enrichment Score: 0.7703170186401995
Category	Term	Count	%	PValue	Genes	List Total	Pop Hits	Pop Total	Fold Enrichment	Bonferroni	Benjamini	FDR
PUBMED_ID	16239144	3	0.24855	0.153995	ILMN_1686553, ILMN_1660844, ILMN_1679483	1207	16	27491	4.27056	1	1	97.3408
GOTERM_CC_FAT	GO:0032039~integrator complex	3	0.24855	0.160867	ILMN_1686553, ILMN_1660844, ILMN_1679483	712	13	12782	4.14283	1	0.707036	91.8153
GOTERM_BP_FAT	GO:0016073~snRNA metabolic process	3	0.24855	0.182969	ILMN_1686553, ILMN_1660844, ILMN_1679483	886	12	13528	3.81716	1	0.943934	97.2606
GOTERM_BP_FAT	GO:0016180~snRNA processing	3	0.24855	0.182969	ILMN_1686553, ILMN_1660844, ILMN_1679483	886	12	13528	3.81716	1	0.943934	97.2606
Annotation Cluster 108	Enrichment Score: 0.7609123806590474
Category	Term	Count	%	PValue	Genes	List Total	Pop Hits	Pop Total	Fold Enrichment	Bonferroni	Benjamini	FDR
GOTERM_BP_FAT	GO:0000075~cell cycle checkpoint	12	0.9942	0.0348543	ILMN_1689665, ILMN_1693145, ILMN_1763575, ILMN_1672357, ILMN_1797445, ILMN_1730999, ILMN_1653828, ILMN_1691188, ILMN_1814122, ILMN_1740216, ILMN_1784584, ILMN_1660368	886	91	13528	2.01344	1	0.58592	46.8233
GOTERM_BP_FAT	GO:0042770~DNA damage response, signal transduction	9	0.74565	0.151343	ILMN_1783753, ILMN_1689665, ILMN_1672357, ILMN_1708764, ILMN_1668910, ILMN_1691188, ILMN_1814122, ILMN_1784584, ILMN_1788363	886	80	13528	1.71772	1	0.920008	94.6137
GOTERM_BP_FAT	GO:0000077~DNA damage checkpoint	5	0.41425	0.385161	ILMN_1689665, ILMN_1672357, ILMN_1691188, ILMN_1814122, ILMN_1784584	886	48	13528	1.59048	1	0.99464	99.9826
GOTERM_BP_FAT	GO:0031570~DNA integrity checkpoint	5	0.41425	0.445135	ILMN_1689665, ILMN_1672357, ILMN_1691188, ILMN_1814122, ILMN_1784584	886	52	13528	1.46814	1	0.996916	99.9972
Annotation Cluster 109	Enrichment Score: 0.7544538147216572
Category	Term	Count	%	PValue	Genes	List Total	Pop Hits	Pop Total	Fold Enrichment	Bonferroni	Benjamini	FDR
INTERPRO	IPR013817:Pre-ATP-grasp fold	3	0.24855	0.0905877	ILMN_1714384, ILMN_1760174, ILMN_1679476	1081	8	16659	5.77902	1	0.909531	79.1304
UP_SEQ_FEATURE	domain:ATP-grasp	3	0.24855	0.17103	ILMN_1714384, ILMN_1760174, ILMN_1679476	1199	12	19113	3.9852	1	0.99309	96.5856
INTERPRO	IPR011761:ATP-grasp fold	3	0.24855	0.204524	ILMN_1714384, ILMN_1760174, ILMN_1679476	1081	13	16659	3.55632	1	0.988927	97.7078
INTERPRO	IPR013816:ATP-grasp fold, subdomain 2	3	0.24855	0.302899	ILMN_1714384, ILMN_1760174, ILMN_1679476	1081	17	16659	2.71954	1	0.997196	99.7404
Annotation Cluster 110	Enrichment Score: 0.7339685719355173
Category	Term	Count	%	PValue	Genes	List Total	Pop Hits	Pop Total	Fold Enrichment	Bonferroni	Benjamini	FDR
GOTERM_BP_FAT	GO:0032319~regulation of Rho GTPase activity	5	0.41425	0.107023	ILMN_1737314, ILMN_1797367, ILMN_1727171, ILMN_1750256, ILMN_1769031	886	28	13528	2.72654	1	0.859937	86.6692
GOTERM_BP_FAT	GO:0035020~regulation of Rac protein signal transduction	3	0.24855	0.182969	ILMN_1727171, ILMN_1750256, ILMN_1769031	886	12	13528	3.81716	1	0.943934	97.2606
GOTERM_BP_FAT	GO:0035023~regulation of Rho protein signal transduction	9	0.74565	0.320804	ILMN_1755016, ILMN_1737314, ILMN_1797367, ILMN_1768052, ILMN_1727171, ILMN_1796912, ILMN_1727205, ILMN_1750256, ILMN_1769031, ILMN_1732371	886	99	13528	1.38806	1	0.988649	99.8979
Annotation Cluster 111	Enrichment Score: 0.701368940905079
Category	Term	Count	%	PValue	Genes	List Total	Pop Hits	Pop Total	Fold Enrichment	Bonferroni	Benjamini	FDR
GOTERM_BP_FAT	GO:0042375~quinone cofactor metabolic process	4	0.3314	0.0487333	ILMN_1801378, ILMN_1703324, ILMN_1783985, ILMN_1795407	886	13	13528	4.69804	1	0.676277	58.9101
SP_PIR_KEYWORDS	ubiquinone biosynthesis	3	0.24855	0.104409	ILMN_1801378, ILMN_1703324, ILMN_1783985	1200	9	19235	5.34306	1	0.559199	79.2616
GOTERM_BP_FAT	GO:0045426~quinone cofactor biosynthetic process	3	0.24855	0.113334	ILMN_1801378, ILMN_1703324, ILMN_1783985	886	9	13528	5.08954	1	0.87451	88.2506
GOTERM_BP_FAT	GO:0006743~ubiquinone metabolic process	3	0.24855	0.113334	ILMN_1801378, ILMN_1703324, ILMN_1783985	886	9	13528	5.08954	1	0.87451	88.2506
GOTERM_BP_FAT	GO:0006744~ubiquinone biosynthetic process	3	0.24855	0.113334	ILMN_1801378, ILMN_1703324, ILMN_1783985	886	9	13528	5.08954	1	0.87451	88.2506
GOTERM_BP_FAT	GO:0009108~coenzyme biosynthetic process	7	0.57995	0.296276	ILMN_1801378, ILMN_1703324, ILMN_1677962, ILMN_1743910, ILMN_1772521, ILMN_1786186, ILMN_1737036, ILMN_1783985	886	69	13528	1.54899	1	0.985727	99.8079
GOTERM_BP_FAT	GO:0051188~cofactor biosynthetic process	9	0.74565	0.30114	ILMN_1801378, ILMN_1703324, ILMN_1689342, ILMN_1677962, ILMN_1743910, ILMN_1772521, ILMN_1786186, ILMN_1737036, ILMN_1783985, ILMN_1809963	886	97	13528	1.41668	1	0.98662	99.8302
GOTERM_BP_FAT	GO:0051186~cofactor metabolic process	15	1.24275	0.39903	ILMN_1689342, ILMN_1743784, ILMN_1791182, ILMN_1743910, ILMN_1772521, ILMN_1750800, ILMN_1786186, ILMN_1809963, ILMN_1795407, ILMN_1703324, ILMN_1801378, ILMN_1760174, ILMN_1677962, ILMN_1811933, ILMN_1783985, ILMN_1714809, ILMN_1737036	886	195	13528	1.17451	1	0.995527	99.9884
GOTERM_BP_FAT	GO:0006732~coenzyme metabolic process	11	0.91135	0.548208	ILMN_1743784, ILMN_1791182, ILMN_1743910, ILMN_1772521, ILMN_1750800, ILMN_1786186, ILMN_1703324, ILMN_1801378, ILMN_1677962, ILMN_1811933, ILMN_1783985, ILMN_1714809, ILMN_1737036	886	153	13528	1.09774	1	0.99875	99.9999
GOTERM_BP_FAT	GO:0006733~oxidoreduction coenzyme metabolic process	4	0.3314	0.670265	ILMN_1801378, ILMN_1703324, ILMN_1714809, ILMN_1783985	886	52	13528	1.17451	1	0.999655	100
Annotation Cluster 112	Enrichment Score: 0.6831041488031451
Category	Term	Count	%	PValue	Genes	List Total	Pop Hits	Pop Total	Fold Enrichment	Bonferroni	Benjamini	FDR
GOTERM_MF_FAT	GO:0016779~nucleotidyltransferase activity	13	1.07705	0.133155	ILMN_1767894, ILMN_1798354, ILMN_1671257, ILMN_1767422, ILMN_1716973, ILMN_1689445, ILMN_1785198, ILMN_1655137, ILMN_1694502, ILMN_1707062, ILMN_1756793, ILMN_1777526, ILMN_1742133	872	125	12983	1.54843	1	0.813812	89.0287
GOTERM_MF_FAT	GO:0034061~DNA polymerase activity	6	0.4971	0.148168	ILMN_1767894, ILMN_1671257, ILMN_1716973, ILMN_1707062, ILMN_1785198, ILMN_1756793	872	42	12983	2.12697	1	0.832577	91.6263
GOTERM_MF_FAT	GO:0003887~DNA-directed DNA polymerase activity	5	0.41425	0.164174	ILMN_1767894, ILMN_1716973, ILMN_1707062, ILMN_1785198, ILMN_1756793	872	32	12983	2.32637	1	0.850239	93.7554
SP_PIR_KEYWORDS	dna synthesis	3	0.24855	0.192509	ILMN_1767894, ILMN_1707062, ILMN_1756793	1200	13	19235	3.69904	1	0.765496	95.2665
SP_PIR_KEYWORDS	nucleotidyltransferase	7	0.57995	0.336396	ILMN_1655137, ILMN_1767894, ILMN_1716973, ILMN_1694502, ILMN_1707062, ILMN_1785198, ILMN_1756793	1200	76	19235	1.47637	1	0.884249	99.7121
SP_PIR_KEYWORDS	dna-directed dna polymerase	3	0.24855	0.37989	ILMN_1767894, ILMN_1785198, ILMN_1756793	1200	21	19235	2.28988	1	0.907369	99.8905
Annotation Cluster 113	Enrichment Score: 0.6817767436232963
Category	Term	Count	%	PValue	Genes	List Total	Pop Hits	Pop Total	Fold Enrichment	Bonferroni	Benjamini	FDR
SP_PIR_KEYWORDS	4fe-4s	5	0.41425	0.0668139	ILMN_1711023, ILMN_1689342, ILMN_1714438, ILMN_1750800, ILMN_1809963	1200	25	19235	3.20583	1	0.44479	62.7134
GOTERM_MF_FAT	GO:0051539~4 iron, 4 sulfur cluster binding	5	0.41425	0.082739	ILMN_1711023, ILMN_1689342, ILMN_1714438, ILMN_1750800, ILMN_1809963	872	25	12983	2.97775	1	0.704522	73.7005
UP_SEQ_FEATURE	metal ion-binding site:Iron-sulfur (4Fe-4S)	3	0.24855	0.265197	ILMN_1711023, ILMN_1714438, ILMN_1750800	1199	16	19113	2.9889	1	0.999222	99.6106
SP_PIR_KEYWORDS	iron-sulfur	5	0.41425	0.293314	ILMN_1711023, ILMN_1689342, ILMN_1714438, ILMN_1750800, ILMN_1809963	1200	44	19235	1.8215	1	0.858793	99.2937
GOTERM_MF_FAT	GO:0051536~iron-sulfur cluster binding	5	0.41425	0.434441	ILMN_1711023, ILMN_1689342, ILMN_1714438, ILMN_1750800, ILMN_1809963	872	50	12983	1.48888	1	0.983278	99.9851
GOTERM_MF_FAT	GO:0051540~metal cluster binding	5	0.41425	0.434441	ILMN_1711023, ILMN_1689342, ILMN_1714438, ILMN_1750800, ILMN_1809963	872	50	12983	1.48888	1	0.983278	99.9851
Annotation Cluster 114	Enrichment Score: 0.6720956485364049
Category	Term	Count	%	PValue	Genes	List Total	Pop Hits	Pop Total	Fold Enrichment	Bonferroni	Benjamini	FDR
GOTERM_MF_FAT	GO:0046030~inositol trisphosphate phosphatase activity	3	0.24855	0.118257	ILMN_1735224, ILMN_1810116, ILMN_1777644	872	9	12983	4.96292	1	0.786668	85.7206
GOTERM_MF_FAT	GO:0004445~inositol-polyphosphate 5-phosphatase activity	3	0.24855	0.118257	ILMN_1735224, ILMN_1810116, ILMN_1777644	872	9	12983	4.96292	1	0.786668	85.7206
INTERPRO	IPR000300:Inositol polyphosphate related phosphatase	3	0.24855	0.133743	ILMN_1735224, ILMN_1810116, ILMN_1777644	1081	10	16659	4.62322	1	0.960414	90.6436
SMART	SM00128:IPPc	3	0.24855	0.17516	ILMN_1735224, ILMN_1810116, ILMN_1777644	696	10	9079	3.91336	1	0.84196	92.3412
GOTERM_MF_FAT	GO:0004437~inositol or phosphatidylinositol phosphatase activity	4	0.3314	0.251895	ILMN_1735224, ILMN_1810116, ILMN_1777644, ILMN_1701134	872	26	12983	2.29058	1	0.92886	98.8759
INTERPRO	IPR005135:Endonuclease/exonuclease/phosphatase	4	0.3314	0.271604	ILMN_1680996, ILMN_1735224, ILMN_1810116, ILMN_1777644	1081	28	16659	2.20153	1	0.99553	99.4643
KEGG_PATHWAY	hsa00562:Inositol phosphate metabolism	5	0.41425	0.407955	ILMN_1735224, ILMN_1770425, ILMN_1810116, ILMN_1777644, ILMN_1701134	306	54	5085	1.53867	1	0.901243	99.8205
KEGG_PATHWAY	hsa04070:Phosphatidylinositol signaling system	6	0.4971	0.459314	ILMN_1735224, ILMN_1770425, ILMN_1735301, ILMN_1810116, ILMN_1777644, ILMN_1701134	306	74	5085	1.34738	1	0.902499	99.9399
Annotation Cluster 115	Enrichment Score: 0.671345881737556
Category	Term	Count	%	PValue	Genes	List Total	Pop Hits	Pop Total	Fold Enrichment	Bonferroni	Benjamini	FDR
SP_PIR_KEYWORDS	rna-mediated gene silencing	5	0.41425	0.0841593	ILMN_1655137, ILMN_1671326, ILMN_1759495, ILMN_1729767, ILMN_1769606	1200	27	19235	2.96836	1	0.496273	71.4697
PUBMED_ID	19138993	4	0.3314	0.0946843	ILMN_1671326, ILMN_1759495, ILMN_1729767, ILMN_1770206	1207	25	27491	3.64421	1	0.999987	88.4386
GOTERM_BP_FAT	GO:0016458~gene silencing	7	0.57995	0.157804	ILMN_1814173, ILMN_1655137, ILMN_1671326, ILMN_1759495, ILMN_1729767, ILMN_1769606, ILMN_1657868	886	56	13528	1.90858	1	0.924583	95.2989
GOTERM_BP_FAT	GO:0031047~gene silencing by RNA	5	0.41425	0.166715	ILMN_1655137, ILMN_1671326, ILMN_1759495, ILMN_1729767, ILMN_1769606	886	33	13528	2.31343	1	0.931788	96.1099
GOTERM_BP_FAT	GO:0035195~gene silencing by miRNA	3	0.24855	0.306709	ILMN_1655137, ILMN_1671326, ILMN_1729767	886	17	13528	2.69446	1	0.987367	99.8528
GOTERM_BP_FAT	GO:0035194~posttranscriptional gene silencing by RNA	3	0.24855	0.403544	ILMN_1655137, ILMN_1671326, ILMN_1729767	886	21	13528	2.18123	1	0.995506	99.9899
GOTERM_BP_FAT	GO:0016441~posttranscriptional gene silencing	3	0.24855	0.403544	ILMN_1655137, ILMN_1671326, ILMN_1729767	886	21	13528	2.18123	1	0.995506	99.9899
SP_PIR_KEYWORDS	translation regulation	6	0.4971	0.40668	ILMN_1765091, ILMN_1722345, ILMN_1671326, ILMN_1729767, ILMN_1769606, ILMN_1654628	1200	67	19235	1.43545	1	0.919429	99.9417
Annotation Cluster 116	Enrichment Score: 0.6554198542441468
Category	Term	Count	%	PValue	Genes	List Total	Pop Hits	Pop Total	Fold Enrichment	Bonferroni	Benjamini	FDR
GOTERM_MF_FAT	GO:0016251~general RNA polymerase II transcription factor activity	7	0.57995	0.116174	ILMN_1754923, ILMN_1671839, ILMN_1697117, ILMN_1721729, ILMN_1737535, ILMN_1772651, ILMN_1777526	872	50	12983	2.08443	1	0.785241	85.19
PUBMED_ID	14576168	4	0.3314	0.153314	ILMN_1754923, ILMN_1721729, ILMN_1777526, ILMN_1722953	1207	31	27491	2.93888	1	1	97.294
PUBMED_ID	15989967	4	0.3314	0.164004	ILMN_1754923, ILMN_1708764, ILMN_1721729, ILMN_1777526	1207	32	27491	2.84704	1	1	97.9458
PUBMED_ID	15175163	4	0.3314	0.267687	ILMN_1765704, ILMN_1754923, ILMN_1721729, ILMN_1777526	1207	41	27491	2.22208	1	1	99.8838
GOTERM_MF_FAT	GO:0016455~RNA polymerase II transcription mediator activity	4	0.3314	0.307917	ILMN_1754923, ILMN_1721729, ILMN_1772651, ILMN_1777526	872	29	12983	2.05362	1	0.957099	99.6627
GOTERM_CC_FAT	GO:0016592~Srb-mediator complex	3	0.24855	0.485147	ILMN_1754923, ILMN_1721729, ILMN_1777526	712	29	12782	1.85713	1	0.955558	99.9923
Annotation Cluster 117	Enrichment Score: 0.6462106853182809
Category	Term	Count	%	PValue	Genes	List Total	Pop Hits	Pop Total	Fold Enrichment	Bonferroni	Benjamini	FDR
UP_SEQ_FEATURE	domain:F-box	8	0.6628	0.16392	ILMN_1799389, ILMN_1756874, ILMN_1794260, ILMN_1668414, ILMN_1745887, ILMN_1714428, ILMN_1693438, ILMN_1665538	1199	72	19113	1.7712	1	0.991693	96.018
INTERPRO	IPR001810:Cyclin-like F-box	8	0.6628	0.166953	ILMN_1799389, ILMN_1756874, ILMN_1794260, ILMN_1668414, ILMN_1745887, ILMN_1714428, ILMN_1693438, ILMN_1665538	1081	70	16659	1.76123	1	0.977772	95.0912
PUBMED_ID	10531037	4	0.3314	0.19728	ILMN_1799389, ILMN_1668414, ILMN_1714428, ILMN_1693438	1207	35	27491	2.60301	1	1	99.1488
PUBMED_ID	10531035	4	0.3314	0.208714	ILMN_1799389, ILMN_1668414, ILMN_1745887, ILMN_1665538	1207	36	27491	2.5307	1	1	99.3764
SMART	SM00256:FBOX	8	0.6628	0.27506	ILMN_1799389, ILMN_1756874, ILMN_1794260, ILMN_1668414, ILMN_1745887, ILMN_1714428, ILMN_1693438, ILMN_1665538	696	69	9079	1.51241	1	0.944701	98.632
PUBMED_ID	15520277	3	0.24855	0.428004	ILMN_1756874, ILMN_1794260, ILMN_1693438	1207	33	27491	2.07057	1	1	99.9995
Annotation Cluster 118	Enrichment Score: 0.6408831161347223
Category	Term	Count	%	PValue	Genes	List Total	Pop Hits	Pop Total	Fold Enrichment	Bonferroni	Benjamini	FDR
PUBMED_ID	14519844	3	0.24855	0.169708	ILMN_1752677, ILMN_1747146, ILMN_1802519	1207	17	27491	4.01935	1	1	98.2293
PUBMED_ID	14505570	3	0.24855	0.185671	ILMN_1752677, ILMN_1747146, ILMN_1802519	1207	18	27491	3.79605	1	1	98.8378
GOTERM_CC_FAT	GO:0005770~late endosome	5	0.41425	0.379233	ILMN_1722056, ILMN_1752677, ILMN_1696065, ILMN_1747146, ILMN_1802519	712	56	12782	1.60288	1	0.914338	99.8891
Annotation Cluster 119	Enrichment Score: 0.6372099744966896
Category	Term	Count	%	PValue	Genes	List Total	Pop Hits	Pop Total	Fold Enrichment	Bonferroni	Benjamini	FDR
GOTERM_BP_FAT	GO:0016049~cell growth	8	0.6628	0.102097	ILMN_1805344, ILMN_1689342, ILMN_1788232, ILMN_1748476, ILMN_1735301, ILMN_1727617, ILMN_1697919, ILMN_1769031	886	61	13528	2.00244	1	0.849596	85.2978
GOTERM_BP_FAT	GO:0032535~regulation of cellular component size	22	1.8227	0.240329	ILMN_1805344, ILMN_1689342, ILMN_1748476, ILMN_1681118, ILMN_1797367, ILMN_1737314, ILMN_1697919, ILMN_1674265, ILMN_1704369, ILMN_1775743, ILMN_1761828, ILMN_1788232, ILMN_1735301, ILMN_1727617, ILMN_1736015, ILMN_1689001, ILMN_1727171, ILMN_1741477, ILMN_1663106, ILMN_1689747, ILMN_1750256, ILMN_1769031	886	271	13528	1.23952	1	0.972122	99.2503
GOTERM_BP_FAT	GO:0008361~regulation of cell size	17	1.40845	0.273835	ILMN_1805344, ILMN_1689342, ILMN_1681118, ILMN_1797367, ILMN_1737314, ILMN_1748476, ILMN_1697919, ILMN_1775743, ILMN_1761828, ILMN_1788232, ILMN_1735301, ILMN_1727617, ILMN_1736015, ILMN_1689001, ILMN_1741477, ILMN_1689747, ILMN_1769031	886	206	13528	1.26003	1	0.981922	99.6642
GOTERM_BP_FAT	GO:0040007~growth	14	1.1599	0.420582	ILMN_1814173, ILMN_1805344, ILMN_1748476, ILMN_1689342, ILMN_1725183, ILMN_1697919, ILMN_1795852, ILMN_1784217, ILMN_1761086, ILMN_1788232, ILMN_1735301, ILMN_1727617, ILMN_1681703, ILMN_1769031	886	183	13528	1.16809	1	0.99638	99.994
Annotation Cluster 120	Enrichment Score: 0.6126051840567046
Category	Term	Count	%	PValue	Genes	List Total	Pop Hits	Pop Total	Fold Enrichment	Bonferroni	Benjamini	FDR
UP_SEQ_FEATURE	domain:Ras-GAP	3	0.24855	0.21766	ILMN_1726387, ILMN_1808850, ILMN_1671221	1199	14	19113	3.41588	1	0.997711	98.796
INTERPRO	IPR001936:Ras GTPase-activating protein	3	0.24855	0.228976	ILMN_1726387, ILMN_1808850, ILMN_1671221	1081	14	16659	3.3023	1	0.992649	98.6307
SMART	SM00323:RasGAP	3	0.24855	0.291484	ILMN_1726387, ILMN_1808850, ILMN_1671221	696	14	9079	2.79526	1	0.946283	98.9924
Annotation Cluster 121	Enrichment Score: 0.6038366636090824
Category	Term	Count	%	PValue	Genes	List Total	Pop Hits	Pop Total	Fold Enrichment	Bonferroni	Benjamini	FDR
GOTERM_BP_FAT	GO:0042770~DNA damage response, signal transduction	9	0.74565	0.151343	ILMN_1783753, ILMN_1689665, ILMN_1672357, ILMN_1708764, ILMN_1668910, ILMN_1691188, ILMN_1814122, ILMN_1784584, ILMN_1788363	886	80	13528	1.71772	1	0.920008	94.6137
GOTERM_BP_FAT	GO:0008629~induction of apoptosis by intracellular signals	6	0.4971	0.277399	ILMN_1783753, ILMN_1756787, ILMN_1708764, ILMN_1695792, ILMN_1668910, ILMN_1788363	886	54	13528	1.69651	1	0.982028	99.6923
GOTERM_BP_FAT	GO:0008630~DNA damage response, signal transduction resulting in induction of apoptosis	4	0.3314	0.367641	ILMN_1783753, ILMN_1708764, ILMN_1668910, ILMN_1788363	886	33	13528	1.85074	1	0.993167	99.9714
Annotation Cluster 122	Enrichment Score: 0.5918282561964926
Category	Term	Count	%	PValue	Genes	List Total	Pop Hits	Pop Total	Fold Enrichment	Bonferroni	Benjamini	FDR
GOTERM_CC_FAT	GO:0048475~coated membrane	9	0.74565	0.0228329	ILMN_1669377, ILMN_1754531, ILMN_1728535, ILMN_1694584, ILMN_1717317, ILMN_1708174, ILMN_1809040, ILMN_1699703, ILMN_1735148, ILMN_1658175	712	63	12782	2.56461	0.99998	0.232191	28.0804
GOTERM_CC_FAT	GO:0030117~membrane coat	9	0.74565	0.0228329	ILMN_1669377, ILMN_1754531, ILMN_1728535, ILMN_1694584, ILMN_1717317, ILMN_1708174, ILMN_1809040, ILMN_1699703, ILMN_1735148, ILMN_1658175	712	63	12782	2.56461	0.99998	0.232191	28.0804
GOTERM_CC_FAT	GO:0044431~Golgi apparatus part	25	2.07125	0.0386892	ILMN_1728535, ILMN_1787689, ILMN_1775637, ILMN_1694584, ILMN_1796150, ILMN_1669377, ILMN_1776993, ILMN_1735584, ILMN_1781386, ILMN_1753712, ILMN_1735058, ILMN_1658175, ILMN_1803464, ILMN_1754531, ILMN_1722056, ILMN_1687567, ILMN_1712631, ILMN_1708174, ILMN_1651719, ILMN_1696065, ILMN_1717317, ILMN_1809040, ILMN_1735148, ILMN_1699703, ILMN_1815148, ILMN_1745969	712	294	12782	1.52655	1	0.319912	43.0553
GOTERM_CC_FAT	GO:0030120~vesicle coat	6	0.4971	0.0577819	ILMN_1754531, ILMN_1728535, ILMN_1694584, ILMN_1809040, ILMN_1699703, ILMN_1735148	712	38	12782	2.83457	1	0.421511	57.2318
GOTERM_CC_FAT	GO:0030118~clathrin coat	6	0.4971	0.0633832	ILMN_1669377, ILMN_1694584, ILMN_1717317, ILMN_1708174, ILMN_1809040, ILMN_1699703, ILMN_1658175	712	39	12782	2.76188	1	0.445999	60.7204
GOTERM_CC_FAT	GO:0030660~Golgi-associated vesicle membrane	5	0.41425	0.0748037	ILMN_1754531, ILMN_1728535, ILMN_1694584, ILMN_1809040, ILMN_1699703	712	29	12782	3.09522	1	0.497424	67.0291
GOTERM_CC_FAT	GO:0030131~clathrin adaptor complex	5	0.41425	0.0748037	ILMN_1669377, ILMN_1717317, ILMN_1708174, ILMN_1809040, ILMN_1699703, ILMN_1658175	712	29	12782	3.09522	1	0.497424	67.0291
GOTERM_CC_FAT	GO:0030119~AP-type membrane coat adaptor complex	5	0.41425	0.0826928	ILMN_1669377, ILMN_1717317, ILMN_1708174, ILMN_1809040, ILMN_1699703, ILMN_1658175	712	30	12782	2.99204	1	0.52098	70.8219
GOTERM_CC_FAT	GO:0030126~COPI vesicle coat	3	0.24855	0.121877	ILMN_1754531, ILMN_1728535, ILMN_1699703	712	11	12782	4.89607	1	0.619984	84.3508
GOTERM_CC_FAT	GO:0030663~COPI coated vesicle membrane	3	0.24855	0.141081	ILMN_1754531, ILMN_1728535, ILMN_1699703	712	12	12782	4.48806	1	0.66064	88.5857
GOTERM_CC_FAT	GO:0030137~COPI-coated vesicle	3	0.24855	0.201705	ILMN_1754531, ILMN_1728535, ILMN_1699703	712	15	12782	3.59045	1	0.760156	95.984
PUBMED_ID	11031247	3	0.24855	0.201832	ILMN_1728535, ILMN_1699703, ILMN_1735148	1207	19	27491	3.59626	1	1	99.2476
GOTERM_CC_FAT	GO:0030662~coated vesicle membrane	7	0.57995	0.219587	ILMN_1754531, ILMN_1728535, ILMN_1694584, ILMN_1809040, ILMN_1699703, ILMN_1735148, ILMN_1654541	712	73	12782	1.72145	1	0.783465	97.0934
GOTERM_CC_FAT	GO:0000139~Golgi membrane	14	1.1599	0.236196	ILMN_1754531, ILMN_1728535, ILMN_1775637, ILMN_1687567, ILMN_1712631, ILMN_1694584, ILMN_1776993, ILMN_1735584, ILMN_1809040, ILMN_1735058, ILMN_1753712, ILMN_1699703, ILMN_1735148, ILMN_1815148	712	186	12782	1.35124	1	0.802125	97.8617
GOTERM_CC_FAT	GO:0005798~Golgi-associated vesicle	5	0.41425	0.315057	ILMN_1754531, ILMN_1728535, ILMN_1694584, ILMN_1809040, ILMN_1699703	712	51	12782	1.76002	1	0.86692	99.5485
KEGG_PATHWAY	hsa04142:Lysosome	9	0.74565	0.403877	ILMN_1669377, ILMN_1754531, ILMN_1720604, ILMN_1694584, ILMN_1717317, ILMN_1708174, ILMN_1658175, ILMN_1800733, ILMN_1750664, ILMN_1669878	306	117	5085	1.27828	1	0.904636	99.805
GOTERM_CC_FAT	GO:0030658~transport vesicle membrane	3	0.24855	0.4285	ILMN_1694584, ILMN_1809040, ILMN_1735148	712	26	12782	2.07141	1	0.934998	99.9659
GOTERM_CC_FAT	GO:0030135~coated vesicle	10	0.8285	0.5276	ILMN_1680132, ILMN_1754531, ILMN_1728535, ILMN_1781386, ILMN_1694584, ILMN_1809040, ILMN_1699703, ILMN_1770857, ILMN_1735148, ILMN_1654541	712	159	12782	1.12907	1	0.967114	99.9978
GOTERM_CC_FAT	GO:0030659~cytoplasmic vesicle membrane	8	0.6628	0.660491	ILMN_1754531, ILMN_1728535, ILMN_1694584, ILMN_1809040, ILMN_1699703, ILMN_1770857, ILMN_1735148, ILMN_1654541	712	139	12782	1.03322	1	0.985842	100
SP_PIR_KEYWORDS	cytoplasmic vesicle	14	1.1599	0.727882	ILMN_1690690, ILMN_1728535, ILMN_1737164, ILMN_1684461, ILMN_1694584, ILMN_1793269, ILMN_1770857, ILMN_1702396, ILMN_1695961, ILMN_1724211, ILMN_1797342, ILMN_1781386, ILMN_1699703, ILMN_1733050, ILMN_1796136	1200	238	19235	0.942892	1	0.990772	100
GOTERM_CC_FAT	GO:0012506~vesicle membrane	8	0.6628	0.742031	ILMN_1754531, ILMN_1728535, ILMN_1694584, ILMN_1809040, ILMN_1699703, ILMN_1770857, ILMN_1735148, ILMN_1654541	712	151	12782	0.951112	1	0.992464	100
GOTERM_CC_FAT	GO:0030665~clathrin coated vesicle membrane	3	0.24855	0.802123	ILMN_1694584, ILMN_1809040, ILMN_1654541	712	53	12782	1.01616	1	0.996098	100
GOTERM_CC_FAT	GO:0030136~clathrin-coated vesicle	6	0.4971	0.864771	ILMN_1680132, ILMN_1781386, ILMN_1694584, ILMN_1809040, ILMN_1770857, ILMN_1654541	712	132	12782	0.816011	1	0.998081	100
GOTERM_CC_FAT	GO:0030133~transport vesicle	3	0.24855	0.888781	ILMN_1694584, ILMN_1809040, ILMN_1735148	712	66	12782	0.816011	1	0.998464	100
GOTERM_CC_FAT	GO:0044433~cytoplasmic vesicle part	8	0.6628	0.901539	ILMN_1754531, ILMN_1728535, ILMN_1694584, ILMN_1809040, ILMN_1699703, ILMN_1770857, ILMN_1735148, ILMN_1654541	712	187	12782	0.768011	1	0.998731	100
GOTERM_CC_FAT	GO:0031410~cytoplasmic vesicle	25	2.07125	0.988139	ILMN_1737164, ILMN_1690690, ILMN_1728535, ILMN_1694584, ILMN_1793269, ILMN_1721994, ILMN_1702396, ILMN_1676980, ILMN_1654541, ILMN_1781386, ILMN_1735301, ILMN_1733050, ILMN_1796136, ILMN_1651832, ILMN_1754531, ILMN_1684461, ILMN_1722056, ILMN_1659544, ILMN_1770857, ILMN_1695961, ILMN_1797342, ILMN_1724211, ILMN_1680132, ILMN_1809040, ILMN_1735148, ILMN_1699703	712	642	12782	0.699075	1	0.99998	100
GOTERM_CC_FAT	GO:0016023~cytoplasmic membrane-bounded vesicle	20	1.657	0.992607	ILMN_1754531, ILMN_1728535, ILMN_1722056, ILMN_1694584, ILMN_1659544, ILMN_1770857, ILMN_1793269, ILMN_1721994, ILMN_1702396, ILMN_1695961, ILMN_1676980, ILMN_1797342, ILMN_1654541, ILMN_1680132, ILMN_1781386, ILMN_1735301, ILMN_1809040, ILMN_1735148, ILMN_1699703, ILMN_1796136, ILMN_1651832	712	550	12782	0.652809	1	0.999992	100
GOTERM_CC_FAT	GO:0031982~vesicle	25	2.07125	0.994062	ILMN_1737164, ILMN_1690690, ILMN_1728535, ILMN_1694584, ILMN_1793269, ILMN_1721994, ILMN_1702396, ILMN_1676980, ILMN_1654541, ILMN_1781386, ILMN_1735301, ILMN_1733050, ILMN_1796136, ILMN_1651832, ILMN_1754531, ILMN_1684461, ILMN_1722056, ILMN_1659544, ILMN_1770857, ILMN_1695961, ILMN_1797342, ILMN_1724211, ILMN_1680132, ILMN_1809040, ILMN_1735148, ILMN_1699703	712	670	12782	0.66986	1	0.999995	100
GOTERM_CC_FAT	GO:0031988~membrane-bounded vesicle	20	1.657	0.995497	ILMN_1754531, ILMN_1728535, ILMN_1722056, ILMN_1694584, ILMN_1659544, ILMN_1770857, ILMN_1793269, ILMN_1721994, ILMN_1702396, ILMN_1695961, ILMN_1676980, ILMN_1797342, ILMN_1654541, ILMN_1680132, ILMN_1781386, ILMN_1735301, ILMN_1809040, ILMN_1735148, ILMN_1699703, ILMN_1796136, ILMN_1651832	712	568	12782	0.632121	1	0.999997	100
Annotation Cluster 123	Enrichment Score: 0.5880764385033554
Category	Term	Count	%	PValue	Genes	List Total	Pop Hits	Pop Total	Fold Enrichment	Bonferroni	Benjamini	FDR
INTERPRO	IPR003593:ATPase, AAA+ type, core	14	1.1599	0.141745	ILMN_1712636, ILMN_1729179, ILMN_1659364, ILMN_1689342, ILMN_1717701, ILMN_1784860, ILMN_1651964, ILMN_1724333, ILMN_1763705, ILMN_1784176, ILMN_1776119, ILMN_1724489, ILMN_1705928, ILMN_1806818	1081	144	16659	1.49827	1	0.966098	91.972
SMART	SM00382:AAA	14	1.1599	0.308481	ILMN_1712636, ILMN_1729179, ILMN_1659364, ILMN_1689342, ILMN_1717701, ILMN_1784860, ILMN_1651964, ILMN_1724333, ILMN_1763705, ILMN_1784176, ILMN_1776119, ILMN_1724489, ILMN_1705928, ILMN_1806818	696	144	9079	1.26822	1	0.948227	99.2712
INTERPRO	IPR003959:ATPase, AAA-type, core	5	0.41425	0.393582	ILMN_1712636, ILMN_1659364, ILMN_1729179, ILMN_1724489, ILMN_1763705	1081	49	16659	1.57252	1	0.999222	99.974
Annotation Cluster 124	Enrichment Score: 0.5812530084637322
Category	Term	Count	%	PValue	Genes	List Total	Pop Hits	Pop Total	Fold Enrichment	Bonferroni	Benjamini	FDR
GOTERM_BP_FAT	GO:0030514~negative regulation of BMP signaling pathway	4	0.3314	0.154813	ILMN_1736448, ILMN_1682316, ILMN_1815941, ILMN_1710598	886	21	13528	2.90831	1	0.922681	94.9927
GOTERM_BP_FAT	GO:0030510~regulation of BMP signaling pathway	4	0.3314	0.312715	ILMN_1736448, ILMN_1682316, ILMN_1815941, ILMN_1710598	886	30	13528	2.03582	1	0.987696	99.8739
GOTERM_MF_FAT	GO:0046332~SMAD binding	5	0.41425	0.372636	ILMN_1750079, ILMN_1682316, ILMN_1815941, ILMN_1741477, ILMN_1710598	872	46	12983	1.61834	1	0.971493	99.9261
Annotation Cluster 125	Enrichment Score: 0.5742810198736428
Category	Term	Count	%	PValue	Genes	List Total	Pop Hits	Pop Total	Fold Enrichment	Bonferroni	Benjamini	FDR
PUBMED_ID	3264072	3	0.24855	0.0684861	ILMN_1796106, ILMN_1815148, ILMN_1800733	1207	10	27491	6.83289	1	0.99985	78.5351
PUBMED_ID	8673525	3	0.24855	0.153995	ILMN_1796106, ILMN_1815148, ILMN_1800733	1207	16	27491	4.27056	1	1	97.3408
PUBMED_ID	11530211	3	0.24855	0.218144	ILMN_1796106, ILMN_1815148, ILMN_1800733	1207	20	27491	3.41645	1	1	99.5192
PUBMED_ID	9109416	3	0.24855	0.251044	ILMN_1796106, ILMN_1815148, ILMN_1800733	1207	22	27491	3.10586	1	1	99.8108
PUBMED_ID	8093218	3	0.24855	0.267555	ILMN_1796106, ILMN_1815148, ILMN_1800733	1207	23	27491	2.97082	1	1	99.8833
PUBMED_ID	1736542	3	0.24855	0.267555	ILMN_1796106, ILMN_1815148, ILMN_1800733	1207	23	27491	2.97082	1	1	99.8833
PUBMED_ID	3099781	3	0.24855	0.267555	ILMN_1796106, ILMN_1815148, ILMN_1800733	1207	23	27491	2.97082	1	1	99.8833
PUBMED_ID	2649653	4	0.3314	0.291822	ILMN_1796106, ILMN_1815148, ILMN_1800733, ILMN_1727043	1207	43	27491	2.11873	1	1	99.9438
PUBMED_ID	2542563	3	0.24855	0.365491	ILMN_1796106, ILMN_1815148, ILMN_1800733	1207	29	27491	2.35617	1	1	99.9948
PUBMED_ID	2541446	3	0.24855	0.472694	ILMN_1796106, ILMN_1815148, ILMN_1800733	1207	36	27491	1.89803	1	1	99.9999
PUBMED_ID	2187500	3	0.24855	0.472694	ILMN_1796106, ILMN_1815148, ILMN_1800733	1207	36	27491	1.89803	1	1	99.9999
PUBMED_ID	2829950	3	0.24855	0.487117	ILMN_1796106, ILMN_1815148, ILMN_1800733	1207	37	27491	1.84673	1	1	99.9999
Annotation Cluster 126	Enrichment Score: 0.5703491765640538
Category	Term	Count	%	PValue	Genes	List Total	Pop Hits	Pop Total	Fold Enrichment	Bonferroni	Benjamini	FDR
PUBMED_ID	17344846	36	2.9826	0.000867387	ILMN_1728298, ILMN_1682316, ILMN_1704795, ILMN_1657937, ILMN_1758918, ILMN_1692527, ILMN_1801383, ILMN_1660368, ILMN_1813489, ILMN_1651692, ILMN_1676159, ILMN_1706154, ILMN_1802620, ILMN_1761175, ILMN_1811489, ILMN_1727142, ILMN_1651296, ILMN_1678087, ILMN_1789793, ILMN_1781155, ILMN_1657515, ILMN_1705397, ILMN_1690398, ILMN_1741801, ILMN_1695961, ILMN_1794399, ILMN_1797189, ILMN_1789171, ILMN_17…	1207	451	27491	1.81806	1	0.216835	1.86454
GOTERM_MF_FAT	GO:0004672~protein kinase activity	49	4.05965	0.128466	ILMN_1681304, ILMN_1740216, ILMN_1692527, ILMN_1813489, ILMN_1689896, ILMN_1800642, ILMN_1676159, ILMN_1706154, ILMN_1802620, ILMN_1761175, ILMN_1811489, ILMN_1738681, ILMN_1651296, ILMN_1789793, ILMN_1815475, ILMN_1657515, ILMN_1690398, ILMN_1695961, ILMN_1797189, ILMN_1711189, ILMN_1690122, ILMN_1809890, ILMN_1765704, ILMN_1670796, ILMN_1651949, ILMN_1726392, ILMN_1692261, ILMN_1769031, ILMN_18…	872	606	12983	1.20388	1	0.806083	88.0742
GOTERM_MF_FAT	GO:0004674~protein serine/threonine kinase activity	35	2.89975	0.179133	ILMN_1750364, ILMN_1728298, ILMN_1704795, ILMN_1657937, ILMN_1758918, ILMN_1740216, ILMN_1692527, ILMN_1801383, ILMN_1813489, ILMN_1689896, ILMN_1651692, ILMN_1676159, ILMN_1706154, ILMN_1802620, ILMN_1761175, ILMN_1738681, ILMN_1811489, ILMN_1727142, ILMN_1678087, ILMN_1789793, ILMN_1657515, ILMN_1690398, ILMN_1741801, ILMN_1695961, ILMN_1794399, ILMN_1797189, ILMN_1789171, ILMN_1711189, ILMN_17…	872	430	12983	1.21188	1	0.860121	95.2771
SP_PIR_KEYWORDS	serine/threonine-protein kinase	29	2.40265	0.209191	ILMN_1728298, ILMN_1657937, ILMN_1704795, ILMN_1692527, ILMN_1801383, ILMN_1813489, ILMN_1689896, ILMN_1676159, ILMN_1651692, ILMN_1706154, ILMN_1802620, ILMN_1761175, ILMN_1811489, ILMN_1727142, ILMN_1678087, ILMN_1789793, ILMN_1657515, ILMN_1690398, ILMN_1741801, ILMN_1695961, ILMN_1794399, ILMN_1797189, ILMN_1789171, ILMN_1765704, ILMN_1751871, ILMN_1689001, ILMN_1760281, ILMN_1811652, ILMN_17…	1200	381	19235	1.22007	1	0.787121	96.4857
SP_PIR_KEYWORDS	kinase	49	4.05965	0.228111	ILMN_1704195, ILMN_1768268, ILMN_1763491, ILMN_1692527, ILMN_1813489, ILMN_1664172, ILMN_1689896, ILMN_1676159, ILMN_1706154, ILMN_1707308, ILMN_1802620, ILMN_1761175, ILMN_1811489, ILMN_1732066, ILMN_1651296, ILMN_1789793, ILMN_1815475, ILMN_1657515, ILMN_1690398, ILMN_1695961, ILMN_1797189, ILMN_1809890, ILMN_1765704, ILMN_1692261, ILMN_1769031, ILMN_1811652, ILMN_1728298, ILMN_1743910, ILMN_16…	1200	688	19235	1.14161	1	0.805526	97.5122
INTERPRO	IPR017442:Serine/threonine protein kinase-related	28	2.3198	0.236191	ILMN_1728298, ILMN_1657937, ILMN_1704795, ILMN_1692527, ILMN_1813489, ILMN_1689896, ILMN_1676159, ILMN_1651692, ILMN_1706154, ILMN_1802620, ILMN_1761175, ILMN_1811489, ILMN_1727142, ILMN_1678087, ILMN_1789793, ILMN_1657515, ILMN_1690398, ILMN_1741801, ILMN_1695961, ILMN_1794399, ILMN_1797189, ILMN_1765704, ILMN_1751871, ILMN_1808898, ILMN_1689001, ILMN_1760281, ILMN_1811652, ILMN_1778557	1081	359	16659	1.20195	1	0.992976	98.8274
INTERPRO	IPR002290:Serine/threonine protein kinase	21	1.73985	0.238271	ILMN_1789793, ILMN_1728298, ILMN_1704795, ILMN_1657515, ILMN_1690398, ILMN_1695961, ILMN_1692527, ILMN_1794399, ILMN_1676159, ILMN_1651692, ILMN_1765704, ILMN_1706154, ILMN_1751871, ILMN_1689001, ILMN_1802620, ILMN_1760281, ILMN_1761175, ILMN_1811489, ILMN_1811652, ILMN_1778557, ILMN_1678087	1081	259	16659	1.24952	1	0.992876	98.879
INTERPRO	IPR008271:Serine/threonine protein kinase, active site	27	2.23695	0.280467	ILMN_1728298, ILMN_1657937, ILMN_1704795, ILMN_1692527, ILMN_1813489, ILMN_1689896, ILMN_1676159, ILMN_1651692, ILMN_1706154, ILMN_1802620, ILMN_1761175, ILMN_1811489, ILMN_1727142, ILMN_1678087, ILMN_1789793, ILMN_1657515, ILMN_1690398, ILMN_1741801, ILMN_1695961, ILMN_1794399, ILMN_1797189, ILMN_1765704, ILMN_1751871, ILMN_1689001, ILMN_1760281, ILMN_1811652, ILMN_1778557	1081	354	16659	1.17539	1	0.996122	99.5623
UP_SEQ_FEATURE	binding site:ATP	38	3.1483	0.317424	ILMN_1714384, ILMN_1728298, ILMN_1704795, ILMN_1657937, ILMN_1763491, ILMN_1692527, ILMN_1813489, ILMN_1689896, ILMN_1651692, ILMN_1676159, ILMN_1760174, ILMN_1706154, ILMN_1802620, ILMN_1761175, ILMN_1811489, ILMN_1732066, ILMN_1727142, ILMN_1651832, ILMN_1651296, ILMN_1678087, ILMN_1789793, ILMN_1781155, ILMN_1657515, ILMN_1705397, ILMN_1690398, ILMN_1655434, ILMN_1741801, ILMN_1695961, ILMN_17…	1199	542	19113	1.11762	1	0.999779	99.8967
INTERPRO	IPR000719:Protein kinase, core	34	2.8169	0.368172	ILMN_1728298, ILMN_1657937, ILMN_1704795, ILMN_1681304, ILMN_1692527, ILMN_1813489, ILMN_1689896, ILMN_1651692, ILMN_1676159, ILMN_1706154, ILMN_1802620, ILMN_1761175, ILMN_1811489, ILMN_1727142, ILMN_1651296, ILMN_1678087, ILMN_1789793, ILMN_1781155, ILMN_1657515, ILMN_1690398, ILMN_1741801, ILMN_1695961, ILMN_1794399, ILMN_1797189, ILMN_1765704, ILMN_1751871, ILMN_1808898, ILMN_1651949, ILMN_16…	1081	476	16659	1.10077	1	0.998939	99.9487
UP_SEQ_FEATURE	domain:Protein kinase	32	2.6512	0.407617	ILMN_1728298, ILMN_1657937, ILMN_1704795, ILMN_1681304, ILMN_1692527, ILMN_1813489, ILMN_1689896, ILMN_1651692, ILMN_1676159, ILMN_1706154, ILMN_1802620, ILMN_1761175, ILMN_1811489, ILMN_1727142, ILMN_1651296, ILMN_1678087, ILMN_1789793, ILMN_1781155, ILMN_1690398, ILMN_1741801, ILMN_1695961, ILMN_1794399, ILMN_1797189, ILMN_1765704, ILMN_1751871, ILMN_1808898, ILMN_1651949, ILMN_1689001, ILMN_17…	1199	469	19113	1.08764	1	0.999973	99.992
GOTERM_BP_FAT	GO:0006468~protein amino acid phosphorylation	46	3.8111	0.454032	ILMN_1728298, ILMN_1704795, ILMN_1657937, ILMN_1681304, ILMN_1740216, ILMN_1692527, ILMN_1801383, ILMN_1813489, ILMN_1689896, ILMN_1800642, ILMN_1651692, ILMN_1676159, ILMN_1706154, ILMN_1815941, ILMN_1802620, ILMN_1761175, ILMN_1811489, ILMN_1727142, ILMN_1792341, ILMN_1651296, ILMN_1678087, ILMN_1789793, ILMN_1781155, ILMN_1815475, ILMN_1657515, ILMN_1705397, ILMN_1690398, ILMN_1741801, ILMN_16…	886	667	13528	1.05301	1	0.996889	99.9979
SMART	SM00220:S_TKc	21	1.73985	0.51824	ILMN_1789793, ILMN_1728298, ILMN_1704795, ILMN_1657515, ILMN_1690398, ILMN_1695961, ILMN_1692527, ILMN_1794399, ILMN_1676159, ILMN_1651692, ILMN_1765704, ILMN_1706154, ILMN_1751871, ILMN_1689001, ILMN_1802620, ILMN_1760281, ILMN_1761175, ILMN_1811489, ILMN_1811652, ILMN_1778557, ILMN_1678087	696	259	9079	1.05767	1	0.989098	99.9941
INTERPRO	IPR017441:Protein kinase, ATP binding site	30	2.4855	0.566237	ILMN_1728298, ILMN_1704795, ILMN_1692527, ILMN_1813489, ILMN_1689896, ILMN_1676159, ILMN_1651692, ILMN_1706154, ILMN_1802620, ILMN_1761175, ILMN_1811489, ILMN_1727142, ILMN_1651296, ILMN_1678087, ILMN_1789793, ILMN_1781155, ILMN_1657515, ILMN_1690398, ILMN_1741801, ILMN_1695961, ILMN_1794399, ILMN_1797189, ILMN_1765704, ILMN_1751871, ILMN_1689001, ILMN_1760281, ILMN_1726392, ILMN_1692261, ILMN_18…	1081	455	16659	1.01609	1	0.999956	99.9999
GOTERM_BP_FAT	GO:0016310~phosphorylation	47	3.89395	0.843398	ILMN_1728298, ILMN_1704795, ILMN_1657937, ILMN_1704195, ILMN_1681304, ILMN_1740216, ILMN_1692527, ILMN_1801383, ILMN_1813489, ILMN_1689896, ILMN_1800642, ILMN_1651692, ILMN_1676159, ILMN_1706154, ILMN_1815941, ILMN_1802620, ILMN_1761175, ILMN_1811489, ILMN_1727142, ILMN_1792341, ILMN_1651296, ILMN_1678087, ILMN_1789793, ILMN_1781155, ILMN_1815475, ILMN_1657515, ILMN_1705397, ILMN_1690398, ILMN_17…	886	800	13528	0.897032	1	0.999974	100
GOTERM_BP_FAT	GO:0006793~phosphorus metabolic process	57	4.72245	0.864638	ILMN_1651942, ILMN_1704195, ILMN_1681304, ILMN_1740216, ILMN_1692527, ILMN_1813489, ILMN_1689896, ILMN_1800642, ILMN_1676159, ILMN_1778734, ILMN_1706154, ILMN_1802620, ILMN_1761175, ILMN_1701855, ILMN_1811489, ILMN_1651296, ILMN_1789793, ILMN_1815475, ILMN_1657515, ILMN_1690398, ILMN_1695961, ILMN_1797189, ILMN_1809890, ILMN_1765704, ILMN_1739641, ILMN_1679051, ILMN_1651949, ILMN_1767892, ILMN_17…	886	973	13528	0.894462	1	0.999983	100
GOTERM_BP_FAT	GO:0006796~phosphate metabolic process	57	4.72245	0.864638	ILMN_1651942, ILMN_1704195, ILMN_1681304, ILMN_1740216, ILMN_1692527, ILMN_1813489, ILMN_1689896, ILMN_1800642, ILMN_1676159, ILMN_1778734, ILMN_1706154, ILMN_1802620, ILMN_1761175, ILMN_1701855, ILMN_1811489, ILMN_1651296, ILMN_1789793, ILMN_1815475, ILMN_1657515, ILMN_1690398, ILMN_1695961, ILMN_1797189, ILMN_1809890, ILMN_1765704, ILMN_1739641, ILMN_1679051, ILMN_1651949, ILMN_1767892, ILMN_17…	886	973	13528	0.894462	1	0.999983	100
UP_SEQ_FEATURE	active site:Proton acceptor	35	2.89975	0.900266	ILMN_1771593, ILMN_1728298, ILMN_1799280, ILMN_1704795, ILMN_1657937, ILMN_1692527, ILMN_1707804, ILMN_1813489, ILMN_1689896, ILMN_1651692, ILMN_1676159, ILMN_1706154, ILMN_1657893, ILMN_1802620, ILMN_1761175, ILMN_1811489, ILMN_1727142, ILMN_1651296, ILMN_1678087, ILMN_1789793, ILMN_1781155, ILMN_1657515, ILMN_1690398, ILMN_1741801, ILMN_1695961, ILMN_1657868, ILMN_1794399, ILMN_1797189, ILMN_17…	1199	658	19113	0.847914	1	1	100
Annotation Cluster 127	Enrichment Score: 0.5671320942168203
Category	Term	Count	%	PValue	Genes	List Total	Pop Hits	Pop Total	Fold Enrichment	Bonferroni	Benjamini	FDR
SP_PIR_KEYWORDS	serine/threonine-specific phosphatase	3	0.24855	0.104409	ILMN_1690546, ILMN_1750364, ILMN_1701855	1200	9	19235	5.34306	1	0.559199	79.2616
INTERPRO	IPR004843:Metallophosphoesterase	5	0.41425	0.10441	ILMN_1690546, ILMN_1796349, ILMN_1750364, ILMN_1709725, ILMN_1701855	1081	28	16659	2.75192	1	0.929236	83.791
INTERPRO	IPR006186:Serine/threonine-specific protein phosphatase and bis(5-nucleosyl)-tetraphosphatase	3	0.24855	0.204524	ILMN_1690546, ILMN_1750364, ILMN_1701855	1081	13	16659	3.55632	1	0.988927	97.7078
SMART	SM00156:PP2Ac	3	0.24855	0.262168	ILMN_1690546, ILMN_1750364, ILMN_1701855	696	13	9079	3.01028	1	0.940505	98.2693
UP_SEQ_FEATURE	metal ion-binding site:Iron	5	0.41425	0.325647	ILMN_1690546, ILMN_1750364, ILMN_1709725, ILMN_1731185, ILMN_1701855	1199	46	19113	1.73269	1	0.999808	99.917
SP_PIR_KEYWORDS	phosphoric monoester hydrolase	5	0.41425	0.630993	ILMN_1690546, ILMN_1651942, ILMN_1750364, ILMN_1701855, ILMN_1792341	1200	69	19235	1.16153	1	0.980822	99.9999
SP_PIR_KEYWORDS	metalloprotein	6	0.4971	0.892274	ILMN_1680996, ILMN_1690546, ILMN_1750364, ILMN_1750800, ILMN_1714167, ILMN_1701855	1200	124	19235	0.775605	1	0.998639	100
Annotation Cluster 128	Enrichment Score: 0.5577350321439306
Category	Term	Count	%	PValue	Genes	List Total	Pop Hits	Pop Total	Fold Enrichment	Bonferroni	Benjamini	FDR
KEGG_PATHWAY	hsa00670:One carbon pool by folate	5	0.41425	0.0129972	ILMN_1743784, ILMN_1679476, ILMN_1665331, ILMN_1811933, ILMN_1661264, ILMN_1772521	306	16	5085	5.19301	0.875082	0.50011	14.5979
GOTERM_BP_FAT	GO:0009069~serine family amino acid metabolic process	6	0.4971	0.0246858	ILMN_1736856, ILMN_1743784, ILMN_1665331, ILMN_1811933, ILMN_1661264, ILMN_1657144, ILMN_1804735	886	26	13528	3.52353	1	0.491927	35.9159
GOTERM_BP_FAT	GO:0006563~L-serine metabolic process	3	0.24855	0.0920152	ILMN_1743784, ILMN_1811933, ILMN_1661264, ILMN_1804735	886	8	13528	5.72573	1	0.829129	82.0646
KEGG_PATHWAY	hsa00260:Glycine, serine and threonine metabolism	4	0.3314	0.283877	ILMN_1743784, ILMN_1665331, ILMN_1811933, ILMN_1661264, ILMN_1804735	306	31	5085	2.14421	1	0.860029	98.2182
PUBMED_ID	19048631	3	0.24855	0.365491	ILMN_1743784, ILMN_1811933, ILMN_1661264, ILMN_1804735	1207	29	27491	2.35617	1	1	99.9948
GOTERM_MF_FAT	GO:0030170~pyridoxal phosphate binding	4	0.3314	0.711698	ILMN_1743784, ILMN_1811933, ILMN_1722742, ILMN_1661264, ILMN_1804735	872	54	12983	1.10287	1	0.999023	100
GOTERM_MF_FAT	GO:0070279~vitamin B6 binding	4	0.3314	0.711698	ILMN_1743784, ILMN_1811933, ILMN_1722742, ILMN_1661264, ILMN_1804735	872	54	12983	1.10287	1	0.999023	100
SP_PIR_KEYWORDS	pyridoxal phosphate	4	0.3314	0.75122	ILMN_1743784, ILMN_1811933, ILMN_1722742, ILMN_1661264, ILMN_1804735	1200	62	19235	1.03414	1	0.99224	100
INTERPRO	IPR015421:Pyridoxal phosphate-dependent transferase, major region, subdomain 1	3	0.24855	0.754276	ILMN_1743784, ILMN_1811933, ILMN_1722742, ILMN_1661264	1081	41	16659	1.12761	1	1	100
GOTERM_MF_FAT	GO:0019842~vitamin binding	7	0.57995	0.876292	ILMN_1714384, ILMN_1760174, ILMN_1743784, ILMN_1731185, ILMN_1811933, ILMN_1722742, ILMN_1661264, ILMN_1804735	872	130	12983	0.801703	1	0.999964	100
GOTERM_MF_FAT	GO:0048037~cofactor binding	12	0.9942	0.951075	ILMN_1783753, ILMN_1691294, ILMN_1743784, ILMN_1657868, ILMN_1795407, ILMN_1722742, ILMN_1811933, ILMN_1661264, ILMN_1657893, ILMN_1783985, ILMN_1804735, ILMN_1684271, ILMN_1784269	872	249	12983	0.717531	1	0.999998	100
Annotation Cluster 129	Enrichment Score: 0.553584727309461
Category	Term	Count	%	PValue	Genes	List Total	Pop Hits	Pop Total	Fold Enrichment	Bonferroni	Benjamini	FDR
GOTERM_CC_FAT	GO:0005819~spindle	15	1.24275	0.0343996	ILMN_1761858, ILMN_1767894, ILMN_1807807, ILMN_1669635, ILMN_1720124, ILMN_1676737, ILMN_1712452, ILMN_1742400, ILMN_1695357, ILMN_1718807, ILMN_1772455, ILMN_1734205, ILMN_1728934, ILMN_1801421, ILMN_1727309	712	147	12782	1.83186	1	0.300158	39.3197
GOTERM_CC_FAT	GO:0015630~microtubule cytoskeleton	35	2.89975	0.290026	ILMN_1761858, ILMN_1651942, ILMN_1750364, ILMN_1684754, ILMN_1669635, ILMN_1676737, ILMN_1742400, ILMN_1754407, ILMN_1667306, ILMN_1753890, ILMN_1738681, ILMN_1801421, ILMN_1690487, ILMN_1750256, ILMN_1725183, ILMN_1767894, ILMN_1684038, ILMN_1786328, ILMN_1807807, ILMN_1795852, ILMN_1730698, ILMN_1799951, ILMN_1720124, ILMN_1712452, ILMN_1695357, ILMN_1769118, ILMN_1718807, ILMN_1772455, ILMN_17…	712	549	12782	1.1445	1	0.845562	99.2464
GOTERM_CC_FAT	GO:0005874~microtubule	15	1.24275	0.667674	ILMN_1761858, ILMN_1725183, ILMN_1767894, ILMN_1684038, ILMN_1807807, ILMN_1730698, ILMN_1720124, ILMN_1712452, ILMN_1769118, ILMN_1667306, ILMN_1772455, ILMN_1734205, ILMN_1726392, ILMN_1728934, ILMN_1727309	712	274	12782	0.982787	1	0.986507	100
SP_PIR_KEYWORDS	microtubule	11	0.91135	0.916445	ILMN_1761858, ILMN_1712452, ILMN_1684038, ILMN_1807807, ILMN_1730698, ILMN_1734205, ILMN_1726392, ILMN_1728934, ILMN_1801421, ILMN_1727309, ILMN_1720124	1200	231	19235	0.763294	1	0.999161	100
Annotation Cluster 130	Enrichment Score: 0.5522388007936763
Category	Term	Count	%	PValue	Genes	List Total	Pop Hits	Pop Total	Fold Enrichment	Bonferroni	Benjamini	FDR
GOTERM_MF_FAT	GO:0008094~DNA-dependent ATPase activity	8	0.6628	0.0854845	ILMN_1814173, ILMN_1659364, ILMN_1654583, ILMN_1784860, ILMN_1786016, ILMN_1724489, ILMN_1740216, ILMN_1692021	872	57	12983	2.08965	1	0.710846	74.8919
GOTERM_MF_FAT	GO:0004003~ATP-dependent DNA helicase activity	3	0.24855	0.507202	ILMN_1654583, ILMN_1786016, ILMN_1740216	872	25	12983	1.78665	1	0.990746	99.9982
GOTERM_MF_FAT	GO:0003678~DNA helicase activity	4	0.3314	0.508411	ILMN_1799387, ILMN_1654583, ILMN_1786016, ILMN_1740216, ILMN_1678362	872	40	12983	1.48888	1	0.990557	99.9983
Annotation Cluster 131	Enrichment Score: 0.5508787363094703
Category	Term	Count	%	PValue	Genes	List Total	Pop Hits	Pop Total	Fold Enrichment	Bonferroni	Benjamini	FDR
GOTERM_BP_FAT	GO:0017148~negative regulation of translation	6	0.4971	0.0682247	ILMN_1765091, ILMN_1753716, ILMN_1671326, ILMN_1688534, ILMN_1797367, ILMN_1671921	886	34	13528	2.69446	1	0.768061	71.5767
GOTERM_BP_FAT	GO:0021782~glial cell development	5	0.41425	0.08643	ILMN_1781155, ILMN_1753716, ILMN_1726387, ILMN_1688534, ILMN_1671921	886	26	13528	2.93627	1	0.815265	79.9957
GOTERM_BP_FAT	GO:0010001~glial cell differentiation	7	0.57995	0.130802	ILMN_1800642, ILMN_1814173, ILMN_1781155, ILMN_1753716, ILMN_1726387, ILMN_1688534, ILMN_1671921	886	53	13528	2.01661	1	0.899899	91.7552
GOTERM_BP_FAT	GO:0042063~gliogenesis	8	0.6628	0.131054	ILMN_1800642, ILMN_1814173, ILMN_1781155, ILMN_1753716, ILMN_1726387, ILMN_1688534, ILMN_1796912, ILMN_1671921	886	65	13528	1.87922	1	0.898981	91.7976
GOTERM_BP_FAT	GO:0042552~myelination	4	0.3314	0.456948	ILMN_1726387, ILMN_1688534, ILMN_1797367, ILMN_1671921	886	38	13528	1.60722	1	0.996983	99.9981
GOTERM_BP_FAT	GO:0019228~regulation of action potential in neuron	5	0.41425	0.474467	ILMN_1813846, ILMN_1726387, ILMN_1688534, ILMN_1797367, ILMN_1671921	886	54	13528	1.41376	1	0.997389	99.9989
GOTERM_BP_FAT	GO:0008366~axon ensheathment	4	0.3314	0.524362	ILMN_1726387, ILMN_1688534, ILMN_1797367, ILMN_1671921	886	42	13528	1.45415	1	0.998519	99.9998
GOTERM_BP_FAT	GO:0007272~ensheathment of neurons	4	0.3314	0.524362	ILMN_1726387, ILMN_1688534, ILMN_1797367, ILMN_1671921	886	42	13528	1.45415	1	0.998519	99.9998
GOTERM_BP_FAT	GO:0001508~regulation of action potential	5	0.41425	0.657989	ILMN_1813846, ILMN_1726387, ILMN_1688534, ILMN_1797367, ILMN_1671921	886	68	13528	1.12269	1	0.999621	100
GOTERM_BP_FAT	GO:0042391~regulation of membrane potential	8	0.6628	0.781603	ILMN_1813846, ILMN_1726387, ILMN_1688534, ILMN_1734054, ILMN_1797367, ILMN_1815941, ILMN_1726679, ILMN_1671921	886	134	13528	0.91156	1	0.999928	100
Annotation Cluster 132	Enrichment Score: 0.542687898624635
Category	Term	Count	%	PValue	Genes	List Total	Pop Hits	Pop Total	Fold Enrichment	Bonferroni	Benjamini	FDR
PUBMED_ID	2283726	3	0.24855	0.284059	ILMN_1815148, ILMN_1800733, ILMN_1727043	1207	24	27491	2.84704	1	1	99.9288
PUBMED_ID	8218172	3	0.24855	0.284059	ILMN_1815148, ILMN_1800733, ILMN_1727043	1207	24	27491	2.84704	1	1	99.9288
PUBMED_ID	2649653	4	0.3314	0.291822	ILMN_1796106, ILMN_1815148, ILMN_1800733, ILMN_1727043	1207	43	27491	2.11873	1	1	99.9438
Annotation Cluster 133	Enrichment Score: 0.5408949228867661
Category	Term	Count	%	PValue	Genes	List Total	Pop Hits	Pop Total	Fold Enrichment	Bonferroni	Benjamini	FDR
GOTERM_BP_FAT	GO:0051310~metaphase plate congression	3	0.24855	0.159033	ILMN_1695357, ILMN_1799688, ILMN_1788363	886	11	13528	4.16417	1	0.925152	95.4196
GOTERM_BP_FAT	GO:0051303~establishment of chromosome localization	3	0.24855	0.256964	ILMN_1695357, ILMN_1799688, ILMN_1788363	886	15	13528	3.05372	1	0.977924	99.4945
GOTERM_BP_FAT	GO:0050000~chromosome localization	3	0.24855	0.256964	ILMN_1695357, ILMN_1799688, ILMN_1788363	886	15	13528	3.05372	1	0.977924	99.4945
GOTERM_BP_FAT	GO:0051640~organelle localization	8	0.6628	0.396704	ILMN_1695357, ILMN_1728535, ILMN_1754407, ILMN_1781386, ILMN_1699703, ILMN_1799688, ILMN_1726392, ILMN_1788363	886	92	13528	1.32771	1	0.995533	99.9876
GOTERM_BP_FAT	GO:0051656~establishment of organelle localization	6	0.4971	0.474053	ILMN_1695357, ILMN_1728535, ILMN_1781386, ILMN_1699703, ILMN_1799688, ILMN_1788363	886	69	13528	1.32771	1	0.997476	99.9989
Annotation Cluster 134	Enrichment Score: 0.5373077467063397
Category	Term	Count	%	PValue	Genes	List Total	Pop Hits	Pop Total	Fold Enrichment	Bonferroni	Benjamini	FDR
UP_SEQ_FEATURE	domain:Importin N-terminal	3	0.24855	0.21766	ILMN_1762275, ILMN_1725121, ILMN_1723117	1199	14	19113	3.41588	1	0.997711	98.796
GOTERM_MF_FAT	GO:0008565~protein transporter activity	9	0.74565	0.227746	ILMN_1788163, ILMN_1776993, ILMN_1669377, ILMN_1762275, ILMN_1759495, ILMN_1731287, ILMN_1725121, ILMN_1723117, ILMN_1745969	872	87	12983	1.54022	1	0.914526	98.1626
INTERPRO	IPR001494:Importin-beta, N-terminal	3	0.24855	0.253603	ILMN_1762275, ILMN_1725121, ILMN_1723117	1081	15	16659	3.08215	1	0.994377	99.1985
UP_TISSUE	B-cell lymphoma	9	0.74565	0.564137	ILMN_1762275, ILMN_1759495, ILMN_1667657, ILMN_1696407, ILMN_1689445, ILMN_1773968, ILMN_1720926, ILMN_1725121, ILMN_1723117	1178	125	18201	1.11246	1	0.913974	99.998
Annotation Cluster 135	Enrichment Score: 0.5361533104058451
Category	Term	Count	%	PValue	Genes	List Total	Pop Hits	Pop Total	Fold Enrichment	Bonferroni	Benjamini	FDR
GOTERM_BP_FAT	GO:0001782~B cell homeostasis	3	0.24855	0.159033	ILMN_1756787, ILMN_1707308, ILMN_1727142	886	11	13528	4.16417	1	0.925152	95.4196
GOTERM_BP_FAT	GO:0002260~lymphocyte homeostasis	4	0.3314	0.276162	ILMN_1777783, ILMN_1756787, ILMN_1707308, ILMN_1727142	886	28	13528	2.18123	1	0.981977	99.6828
KEGG_PATHWAY	hsa05120:Epithelial cell signaling in Helicobacter pylori infection	6	0.4971	0.386971	ILMN_1714965, ILMN_1781155, ILMN_1756787, ILMN_1707308, ILMN_1727142, ILMN_1654541	306	68	5085	1.46626	1	0.905367	99.7267
GOTERM_BP_FAT	GO:0001776~leukocyte homeostasis	4	0.3314	0.421752	ILMN_1777783, ILMN_1756787, ILMN_1707308, ILMN_1727142	886	36	13528	1.69651	1	0.996378	99.9942
Annotation Cluster 136	Enrichment Score: 0.5356263128968075
Category	Term	Count	%	PValue	Genes	List Total	Pop Hits	Pop Total	Fold Enrichment	Bonferroni	Benjamini	FDR
GOTERM_BP_FAT	GO:0006024~glycosaminoglycan biosynthetic process	5	0.41425	0.0446356	ILMN_1761259, ILMN_1714349, ILMN_1735058, ILMN_1680390, ILMN_1799815	886	21	13528	3.63539	1	0.658924	55.6425
GOTERM_BP_FAT	GO:0006023~aminoglycan biosynthetic process	5	0.41425	0.0596172	ILMN_1761259, ILMN_1714349, ILMN_1735058, ILMN_1680390, ILMN_1799815	886	23	13528	3.31927	1	0.733283	66.5214
GOTERM_BP_FAT	GO:0000271~polysaccharide biosynthetic process	7	0.57995	0.0712554	ILMN_1761259, ILMN_1714349, ILMN_1735058, ILMN_1727043, ILMN_1680390, ILMN_1799815, ILMN_1664172	886	45	13528	2.37512	1	0.773125	73.1783
KEGG_PATHWAY	hsa00534:Heparan sulfate biosynthesis	4	0.3314	0.202252	ILMN_1761259, ILMN_1714349, ILMN_1796150, ILMN_1799815	306	26	5085	2.55656	1	0.834105	93.4489
GOTERM_BP_FAT	GO:0044272~sulfur compound biosynthetic process	6	0.4971	0.227247	ILMN_1761259, ILMN_1714349, ILMN_1735058, ILMN_1732089, ILMN_1786186, ILMN_1737036, ILMN_1804735	886	50	13528	1.83223	1	0.969555	98.984
GOTERM_MF_FAT	GO:0008375~acetylglucosaminyltransferase activity	5	0.41425	0.249315	ILMN_1796106, ILMN_1697639, ILMN_1761259, ILMN_1680390, ILMN_1799815	872	38	12983	1.95905	1	0.928649	98.8144
GOTERM_BP_FAT	GO:0030203~glycosaminoglycan metabolic process	6	0.4971	0.290285	ILMN_1761259, ILMN_1714349, ILMN_1735058, ILMN_1669878, ILMN_1680390, ILMN_1799815	886	55	13528	1.66567	1	0.984477	99.7766
GOTERM_BP_FAT	GO:0016051~carbohydrate biosynthetic process	9	0.74565	0.401177	ILMN_1776993, ILMN_1761259, ILMN_1714349, ILMN_1735058, ILMN_1727043, ILMN_1688964, ILMN_1680390, ILMN_1799815, ILMN_1664172	886	107	13528	1.28428	1	0.995412	99.9891
GOTERM_BP_FAT	GO:0006022~aminoglycan metabolic process	6	0.4971	0.422029	ILMN_1761259, ILMN_1714349, ILMN_1735058, ILMN_1669878, ILMN_1680390, ILMN_1799815	886	65	13528	1.40941	1	0.996318	99.9942
GOTERM_BP_FAT	GO:0005976~polysaccharide metabolic process	9	0.74565	0.441607	ILMN_1761259, ILMN_1714349, ILMN_1735058, ILMN_1727043, ILMN_1701855, ILMN_1669878, ILMN_1680390, ILMN_1799815, ILMN_1664172	886	111	13528	1.238	1	0.996918	99.9969
GOTERM_BP_FAT	GO:0006790~sulfur metabolic process	9	0.74565	0.481644	ILMN_1777783, ILMN_1731853, ILMN_1761259, ILMN_1760174, ILMN_1714349, ILMN_1735058, ILMN_1732089, ILMN_1786186, ILMN_1737036, ILMN_1804735	886	115	13528	1.19494	1	0.997505	99.9992
GOTERM_BP_FAT	GO:0033692~cellular polysaccharide biosynthetic process	3	0.24855	0.5146	ILMN_1761259, ILMN_1727043, ILMN_1664172	886	26	13528	1.76176	1	0.998301	99.9997
GOTERM_BP_FAT	GO:0030166~proteoglycan biosynthetic process	3	0.24855	0.5146	ILMN_1761259, ILMN_1714349, ILMN_1735058	886	26	13528	1.76176	1	0.998301	99.9997
GOTERM_BP_FAT	GO:0044264~cellular polysaccharide metabolic process	4	0.3314	0.682888	ILMN_1761259, ILMN_1727043, ILMN_1701855, ILMN_1664172	886	53	13528	1.15235	1	0.99971	100
GOTERM_BP_FAT	GO:0006029~proteoglycan metabolic process	3	0.24855	0.781876	ILMN_1761259, ILMN_1714349, ILMN_1735058	886	43	13528	1.06525	1	0.999927	100
GOTERM_BP_FAT	GO:0034637~cellular carbohydrate biosynthetic process	4	0.3314	0.838065	ILMN_1761259, ILMN_1727043, ILMN_1688964, ILMN_1664172	886	69	13528	0.885138	1	0.999972	100
Annotation Cluster 137	Enrichment Score: 0.5248359961818697
Category	Term	Count	%	PValue	Genes	List Total	Pop Hits	Pop Total	Fold Enrichment	Bonferroni	Benjamini	FDR
SP_PIR_KEYWORDS	nucleotide binding	10	0.8285	0.223098	ILMN_1695983, ILMN_1805344, ILMN_1665717, ILMN_1689342, ILMN_1717701, ILMN_1651964, ILMN_1756220, ILMN_1718571, ILMN_1797189, ILMN_1764285	1200	107	19235	1.49805	1	0.801782	97.2715
SP_PIR_KEYWORDS	P-loop	10	0.8285	0.297683	ILMN_1695983, ILMN_1805344, ILMN_1665717, ILMN_1689342, ILMN_1717701, ILMN_1651964, ILMN_1756220, ILMN_1718571, ILMN_1797189, ILMN_1764285	1200	116	19235	1.38182	1	0.860373	99.3535
SP_PIR_KEYWORDS	ATP	17	1.40845	0.401091	ILMN_1805344, ILMN_1781155, ILMN_1722056, ILMN_1717701, ILMN_1651964, ILMN_1704795, ILMN_1718571, ILMN_1777663, ILMN_1797189, ILMN_1695983, ILMN_1765704, ILMN_1808898, ILMN_1756220, ILMN_1689001, ILMN_1764285, ILMN_1651296, ILMN_1778557	1200	236	19235	1.15464	1	0.917845	99.9334
Annotation Cluster 138	Enrichment Score: 0.5235323000848952
Category	Term	Count	%	PValue	Genes	List Total	Pop Hits	Pop Total	Fold Enrichment	Bonferroni	Benjamini	FDR
PUBMED_ID	12391170	3	0.24855	0.185671	ILMN_1767422, ILMN_1689445, ILMN_1742133	1207	18	27491	3.79605	1	1	98.8378
GOTERM_MF_FAT	GO:0003899~DNA-directed RNA polymerase activity	5	0.41425	0.325898	ILMN_1767422, ILMN_1689445, ILMN_1694502, ILMN_1777526, ILMN_1742133	872	43	12983	1.73125	1	0.959719	99.7755
GOTERM_MF_FAT	GO:0034062~RNA polymerase activity	5	0.41425	0.325898	ILMN_1767422, ILMN_1689445, ILMN_1694502, ILMN_1777526, ILMN_1742133	872	43	12983	1.73125	1	0.959719	99.7755
SP_PIR_KEYWORDS	dna-directed rna polymerase	4	0.3314	0.408286	ILMN_1767422, ILMN_1689445, ILMN_1694502, ILMN_1742133	1200	37	19235	1.73288	1	0.918395	99.9439
Annotation Cluster 139	Enrichment Score: 0.5234306324590973
Category	Term	Count	%	PValue	Genes	List Total	Pop Hits	Pop Total	Fold Enrichment	Bonferroni	Benjamini	FDR
UP_SEQ_FEATURE	domain:DRBM 2	3	0.24855	0.17103	ILMN_1789018, ILMN_1679797, ILMN_1729767	1199	12	19113	3.9852	1	0.99309	96.5856
UP_SEQ_FEATURE	domain:DRBM 1	3	0.24855	0.17103	ILMN_1789018, ILMN_1679797, ILMN_1729767	1199	12	19113	3.9852	1	0.99309	96.5856
GOTERM_MF_FAT	GO:0003725~double-stranded RNA binding	4	0.3314	0.382987	ILMN_1789018, ILMN_1804490, ILMN_1679797, ILMN_1729767	872	33	12983	1.8047	1	0.9732	99.9429
INTERPRO	IPR001159:Double-stranded RNA binding	3	0.24855	0.422151	ILMN_1789018, ILMN_1679797, ILMN_1729767	1081	22	16659	2.10146	1	0.999471	99.9883
SMART	SM00358:DSRM	3	0.24855	0.510561	ILMN_1789018, ILMN_1679797, ILMN_1729767	696	22	9079	1.7788	1	0.989056	99.9928
Annotation Cluster 140	Enrichment Score: 0.4966823294531936
Category	Term	Count	%	PValue	Genes	List Total	Pop Hits	Pop Total	Fold Enrichment	Bonferroni	Benjamini	FDR
GOTERM_BP_FAT	GO:0048193~Golgi vesicle transport	12	0.9942	0.238052	ILMN_1728535, ILMN_1661491, ILMN_1687567, ILMN_1712631, ILMN_1705218, ILMN_1776993, ILMN_1781386, ILMN_1753712, ILMN_1735148, ILMN_1699703, ILMN_1679092, ILMN_1673275, ILMN_1745969	886	131	13528	1.39865	1	0.972958	99.2093
SP_PIR_KEYWORDS	er-golgi transport	8	0.6628	0.259209	ILMN_1728535, ILMN_1712631, ILMN_1705218, ILMN_1699703, ILMN_1735148, ILMN_1733050, ILMN_1731287, ILMN_1784584, ILMN_1673275	1200	83	19235	1.54498	1	0.838557	98.6164
GOTERM_BP_FAT	GO:0006888~ER to Golgi vesicle-mediated transport	4	0.3314	0.524362	ILMN_1712631, ILMN_1705218, ILMN_1735148, ILMN_1673275, ILMN_1745969	886	42	13528	1.45415	1	0.998519	99.9998
Annotation Cluster 141	Enrichment Score: 0.49575406391654825
Category	Term	Count	%	PValue	Genes	List Total	Pop Hits	Pop Total	Fold Enrichment	Bonferroni	Benjamini	FDR
GOTERM_BP_FAT	GO:0046545~development of primary female sexual characteristics	8	0.6628	0.163627	ILMN_1777783, ILMN_1688534, ILMN_1795852, ILMN_1778930, ILMN_1737535, ILMN_1681703, ILMN_1718629, ILMN_1671921	886	69	13528	1.77028	1	0.928999	95.8451
GOTERM_BP_FAT	GO:0046660~female sex differentiation	8	0.6628	0.163627	ILMN_1777783, ILMN_1688534, ILMN_1795852, ILMN_1778930, ILMN_1737535, ILMN_1681703, ILMN_1718629, ILMN_1671921	886	69	13528	1.77028	1	0.928999	95.8451
GOTERM_BP_FAT	GO:0022602~ovulation cycle process	7	0.57995	0.218105	ILMN_1777783, ILMN_1688534, ILMN_1795852, ILMN_1737535, ILMN_1681703, ILMN_1718629, ILMN_1671921	886	62	13528	1.72388	1	0.96548	98.7474
GOTERM_BP_FAT	GO:0008585~female gonad development	7	0.57995	0.239744	ILMN_1777783, ILMN_1688534, ILMN_1795852, ILMN_1737535, ILMN_1681703, ILMN_1718629, ILMN_1671921	886	64	13528	1.67001	1	0.9728	99.24
GOTERM_BP_FAT	GO:0042698~ovulation cycle	7	0.57995	0.273308	ILMN_1777783, ILMN_1688534, ILMN_1795852, ILMN_1737535, ILMN_1681703, ILMN_1718629, ILMN_1671921	886	67	13528	1.59523	1	0.982093	99.6598
GOTERM_BP_FAT	GO:0001541~ovarian follicle development	5	0.41425	0.279359	ILMN_1688534, ILMN_1795852, ILMN_1737535, ILMN_1681703, ILMN_1671921	886	41	13528	1.86203	1	0.982299	99.7068
GOTERM_BP_FAT	GO:0008406~gonad development	10	0.8285	0.310811	ILMN_1777783, ILMN_1688534, ILMN_1795852, ILMN_1737535, ILMN_1681703, ILMN_1712560, ILMN_1718629, ILMN_1762531, ILMN_1784217, ILMN_1671921	886	112	13528	1.36327	1	0.987529	99.8675
GOTERM_BP_FAT	GO:0045137~development of primary sexual characteristics	11	0.91135	0.318719	ILMN_1777783, ILMN_1688534, ILMN_1795852, ILMN_1778930, ILMN_1737535, ILMN_1681703, ILMN_1712560, ILMN_1718629, ILMN_1762531, ILMN_1784217, ILMN_1671921	886	127	13528	1.32248	1	0.988462	99.8921
GOTERM_BP_FAT	GO:0048511~rhythmic process	11	0.91135	0.327431	ILMN_1777783, ILMN_1688534, ILMN_1722056, ILMN_1735093, ILMN_1795852, ILMN_1689001, ILMN_1737535, ILMN_1681703, ILMN_1732519, ILMN_1718629, ILMN_1671921	886	128	13528	1.31215	1	0.989465	99.9142
GOTERM_BP_FAT	GO:0007548~sex differentiation	12	0.9942	0.401042	ILMN_1777783, ILMN_1688534, ILMN_1795852, ILMN_1778930, ILMN_1737535, ILMN_1674551, ILMN_1681703, ILMN_1712560, ILMN_1718629, ILMN_1762531, ILMN_1784217, ILMN_1671921	886	151	13528	1.2134	1	0.995496	99.9891
GOTERM_BP_FAT	GO:0048608~reproductive structure development	10	0.8285	0.442547	ILMN_1777783, ILMN_1688534, ILMN_1795852, ILMN_1737535, ILMN_1681703, ILMN_1712560, ILMN_1718629, ILMN_1762531, ILMN_1784217, ILMN_1671921	886	126	13528	1.2118	1	0.996904	99.997
GOTERM_BP_FAT	GO:0046661~male sex differentiation	5	0.41425	0.711976	ILMN_1777783, ILMN_1674551, ILMN_1712560, ILMN_1762531, ILMN_1784217	886	73	13528	1.0458	1	0.999795	100
GOTERM_BP_FAT	GO:0003006~reproductive developmental process	15	1.24275	0.819634	ILMN_1777783, ILMN_1688534, ILMN_1651942, ILMN_1795852, ILMN_1674551, ILMN_1737535, ILMN_1778930, ILMN_1712560, ILMN_1718629, ILMN_1784217, ILMN_1671921, ILMN_1751886, ILMN_1681703, ILMN_1762531, ILMN_1769031	886	262	13528	0.874158	1	0.999962	100
Annotation Cluster 142	Enrichment Score: 0.47665529731882206
Category	Term	Count	%	PValue	Genes	List Total	Pop Hits	Pop Total	Fold Enrichment	Bonferroni	Benjamini	FDR
INTERPRO	IPR019955:Ubiquitin supergroup	6	0.4971	0.246226	ILMN_1657864, ILMN_1756873, ILMN_1697286, ILMN_1727142, ILMN_1691444, ILMN_1708510	1081	52	16659	1.77816	1	0.993718	99.0573
UP_SEQ_FEATURE	domain:Ubiquitin-like	5	0.41425	0.268263	ILMN_1657864, ILMN_1756873, ILMN_1697286, ILMN_1691444, ILMN_1708510	1199	42	19113	1.89771	1	0.999254	99.6388
INTERPRO	IPR000626:Ubiquitin	5	0.41425	0.348527	ILMN_1657864, ILMN_1697286, ILMN_1727142, ILMN_1691444, ILMN_1708510	1081	46	16659	1.67508	1	0.99854	99.9151
INTERPRO	IPR019954:Ubiquitin conserved site	4	0.3314	0.380229	ILMN_1657864, ILMN_1756873, ILMN_1691444, ILMN_1708510	1081	34	16659	1.81303	1	0.999078	99.9627
SMART	SM00213:UBQ	5	0.41425	0.47266	ILMN_1657864, ILMN_1697286, ILMN_1727142, ILMN_1691444, ILMN_1708510	696	46	9079	1.41788	1	0.985351	99.9804
Annotation Cluster 143	Enrichment Score: 0.47493751918953797
Category	Term	Count	%	PValue	Genes	List Total	Pop Hits	Pop Total	Fold Enrichment	Bonferroni	Benjamini	FDR
UP_SEQ_FEATURE	domain:UBA	5	0.41425	0.240277	ILMN_1685580, ILMN_1704795, ILMN_1732226, ILMN_1653856, ILMN_1794399	1199	40	19113	1.9926	1	0.998695	99.29
INTERPRO	IPR015940:Ubiquitin-associated/translation elongation factor EF1B, N-terminal, eukaryote	5	0.41425	0.288675	ILMN_1685580, ILMN_1704795, ILMN_1732226, ILMN_1653856, ILMN_1794399	1081	42	16659	1.83461	1	0.996581	99.6378
SMART	SM00165:UBA	5	0.41425	0.40275	ILMN_1685580, ILMN_1704795, ILMN_1732226, ILMN_1653856, ILMN_1794399	696	42	9079	1.55292	1	0.98026	99.8969
INTERPRO	IPR000449:Ubiquitin-associated/translation elongation factor EF1B, N-terminal	4	0.3314	0.450914	ILMN_1685580, ILMN_1704795, ILMN_1732226, ILMN_1653856	1081	38	16659	1.62218	1	0.999694	99.9949
Annotation Cluster 144	Enrichment Score: 0.4467239361120024
Category	Term	Count	%	PValue	Genes	List Total	Pop Hits	Pop Total	Fold Enrichment	Bonferroni	Benjamini	FDR
GOTERM_BP_FAT	GO:0048872~homeostasis of number of cells	13	1.07705	0.0297945	ILMN_1777783, ILMN_1781155, ILMN_1737314, ILMN_1756787, ILMN_1699636, ILMN_1674551, ILMN_1783606, ILMN_1699357, ILMN_1745365, ILMN_1676010, ILMN_1761086, ILMN_1707308, ILMN_1727142	886	100	13528	1.98492	1	0.538383	41.6357
GOTERM_BP_FAT	GO:0030099~myeloid cell differentiation	12	0.9942	0.0399633	ILMN_1676010, ILMN_1781155, ILMN_1737314, ILMN_1699636, ILMN_1788107, ILMN_1674551, ILMN_1695797, ILMN_1783606, ILMN_1776703, ILMN_1794399, ILMN_1745365, ILMN_1804679	886	93	13528	1.97014	1	0.630404	51.6178
GOTERM_BP_FAT	GO:0030218~erythrocyte differentiation	7	0.57995	0.0594325	ILMN_1676010, ILMN_1781155, ILMN_1737314, ILMN_1699636, ILMN_1674551, ILMN_1783606, ILMN_1745365	886	43	13528	2.48559	1	0.734962	66.4041
GOTERM_BP_FAT	GO:0034101~erythrocyte homeostasis	7	0.57995	0.0986401	ILMN_1676010, ILMN_1781155, ILMN_1737314, ILMN_1699636, ILMN_1674551, ILMN_1783606, ILMN_1745365	886	49	13528	2.18123	1	0.840987	84.2568
GOTERM_BP_FAT	GO:0048534~hemopoietic or lymphoid organ development	19	1.57415	0.43561	ILMN_1777783, ILMN_1781155, ILMN_1737314, ILMN_1716973, ILMN_1699636, ILMN_1674551, ILMN_1778930, ILMN_1695797, ILMN_1783606, ILMN_1776703, ILMN_1794399, ILMN_1804679, ILMN_1653444, ILMN_1745365, ILMN_1676010, ILMN_1690122, ILMN_1764177, ILMN_1788107, ILMN_1721729	886	260	13528	1.11578	1	0.996783	99.9962
GOTERM_BP_FAT	GO:0002520~immune system development	20	1.657	0.443558	ILMN_1777783, ILMN_1781155, ILMN_1737314, ILMN_1716973, ILMN_1699636, ILMN_1674551, ILMN_1778930, ILMN_1695797, ILMN_1783606, ILMN_1776703, ILMN_1794399, ILMN_1804679, ILMN_1653444, ILMN_1745365, ILMN_1676010, ILMN_1690122, ILMN_1764177, ILMN_1788107, ILMN_1721729, ILMN_1788363	886	276	13528	1.10642	1	0.996894	99.9971
GOTERM_BP_FAT	GO:0030097~hemopoiesis	17	1.40845	0.478639	ILMN_1777783, ILMN_1781155, ILMN_1737314, ILMN_1716973, ILMN_1699636, ILMN_1674551, ILMN_1778930, ILMN_1695797, ILMN_1783606, ILMN_1776703, ILMN_1794399, ILMN_1804679, ILMN_1653444, ILMN_1745365, ILMN_1676010, ILMN_1788107, ILMN_1721729	886	236	13528	1.09986	1	0.997422	99.9991
GOTERM_BP_FAT	GO:0042113~B cell activation	6	0.4971	0.560851	ILMN_1807737, ILMN_1737314, ILMN_1716973, ILMN_1788107, ILMN_1788363, ILMN_1717165	886	76	13528	1.20542	1	0.998905	100
GOTERM_BP_FAT	GO:0030098~lymphocyte differentiation	7	0.57995	0.673611	ILMN_1777783, ILMN_1737314, ILMN_1716973, ILMN_1788107, ILMN_1778930, ILMN_1745365, ILMN_1653444	886	103	13528	1.03767	1	0.999666	100
GOTERM_BP_FAT	GO:0045321~leukocyte activation	15	1.24275	0.721786	ILMN_1777783, ILMN_1781155, ILMN_1737314, ILMN_1716973, ILMN_1778930, ILMN_1778560, ILMN_1783606, ILMN_1727524, ILMN_1653444, ILMN_1745365, ILMN_1717165, ILMN_1807737, ILMN_1685580, ILMN_1788107, ILMN_1788363	886	242	13528	0.946402	1	0.999824	100
GOTERM_BP_FAT	GO:0030217~T cell differentiation	4	0.3314	0.806985	ILMN_1777783, ILMN_1778930, ILMN_1745365, ILMN_1653444	886	65	13528	0.939608	1	0.999952	100
GOTERM_BP_FAT	GO:0030183~B cell differentiation	3	0.24855	0.83104	ILMN_1737314, ILMN_1716973, ILMN_1788107	886	48	13528	0.954289	1	0.999968	100
GOTERM_BP_FAT	GO:0046649~lymphocyte activation	11	0.91135	0.84619	ILMN_1777783, ILMN_1807737, ILMN_1685580, ILMN_1737314, ILMN_1716973, ILMN_1788107, ILMN_1778930, ILMN_1788363, ILMN_1745365, ILMN_1653444, ILMN_1717165	886	199	13528	0.843994	1	0.999975	100
GOTERM_BP_FAT	GO:0001775~cell activation	16	1.3256	0.849851	ILMN_1777783, ILMN_1781155, ILMN_1737314, ILMN_1716973, ILMN_1778930, ILMN_1778560, ILMN_1783606, ILMN_1727524, ILMN_1653444, ILMN_1745365, ILMN_1717165, ILMN_1813846, ILMN_1807737, ILMN_1685580, ILMN_1788107, ILMN_1788363	886	287	13528	0.851212	1	0.999977	100
GOTERM_BP_FAT	GO:0002521~leukocyte differentiation	7	0.57995	0.865547	ILMN_1777783, ILMN_1737314, ILMN_1716973, ILMN_1788107, ILMN_1778930, ILMN_1745365, ILMN_1653444	886	131	13528	0.815881	1	0.999983	100
GOTERM_BP_FAT	GO:0042110~T cell activation	5	0.41425	0.968793	ILMN_1777783, ILMN_1685580, ILMN_1778930, ILMN_1745365, ILMN_1653444	886	126	13528	0.605898	1	1	100
Annotation Cluster 145	Enrichment Score: 0.4436273706242507
Category	Term	Count	%	PValue	Genes	List Total	Pop Hits	Pop Total	Fold Enrichment	Bonferroni	Benjamini	FDR
INTERPRO	IPR015917:Peptidase C14, caspase precursor p45, core	3	0.24855	0.228976	ILMN_1756787, ILMN_1736568, ILMN_1789830	1081	14	16659	3.3023	1	0.992649	98.6307
BIOCARTA	h_HivnefPathway:HIV-I Nef: negative effector of Fas and TNF	7	0.57995	0.232967	ILMN_1714965, ILMN_1678962, ILMN_1756787, ILMN_1657937, ILMN_1736568, ILMN_1659463, ILMN_1789830	114	53	1437	1.66485	1	0.889348	96.0152
INTERPRO	IPR011600:Peptidase C14, caspase catalytic	3	0.24855	0.253603	ILMN_1756787, ILMN_1736568, ILMN_1789830	1081	15	16659	3.08215	1	0.994377	99.1985
INTERPRO	IPR001309:Peptidase C14, ICE, catalytic subunit p20	3	0.24855	0.253603	ILMN_1756787, ILMN_1736568, ILMN_1789830	1081	15	16659	3.08215	1	0.994377	99.1985
SMART	SM00115:CASc	3	0.24855	0.291484	ILMN_1756787, ILMN_1736568, ILMN_1789830	696	14	9079	2.79526	1	0.946283	98.9924
INTERPRO	IPR002398:Peptidase C14, caspase precursor p45	3	0.24855	0.375496	ILMN_1756787, ILMN_1736568, ILMN_1789830	1081	20	16659	2.31161	1	0.999041	99.9577
GOTERM_BP_FAT	GO:0008624~induction of apoptosis by extracellular signals	6	0.4971	0.864642	ILMN_1723900, ILMN_1756787, ILMN_1736568, ILMN_1770537, ILMN_1789830, ILMN_1796912	886	112	13528	0.817962	1	0.999983	100
GOTERM_MF_FAT	GO:0004197~cysteine-type endopeptidase activity	4	0.3314	0.870022	ILMN_1756787, ILMN_1736568, ILMN_1789830, ILMN_1798712	872	72	12983	0.827153	1	0.999959	100
Annotation Cluster 146	Enrichment Score: 0.44074898771538157
Category	Term	Count	%	PValue	Genes	List Total	Pop Hits	Pop Total	Fold Enrichment	Bonferroni	Benjamini	FDR
GOTERM_CC_FAT	GO:0005813~centrosome	18	1.4913	0.119839	ILMN_1651942, ILMN_1750364, ILMN_1684754, ILMN_1786328, ILMN_1795852, ILMN_1730698, ILMN_1712452, ILMN_1695357, ILMN_1742400, ILMN_1754407, ILMN_1734205, ILMN_1726392, ILMN_1758778, ILMN_1753890, ILMN_1738681, ILMN_1690487, ILMN_1750256, ILMN_1806818	712	224	12782	1.44259	1	0.61925	83.8245
GOTERM_CC_FAT	GO:0005815~microtubule organizing center	18	1.4913	0.245674	ILMN_1651942, ILMN_1750364, ILMN_1684754, ILMN_1786328, ILMN_1795852, ILMN_1730698, ILMN_1712452, ILMN_1695357, ILMN_1742400, ILMN_1754407, ILMN_1734205, ILMN_1726392, ILMN_1758778, ILMN_1753890, ILMN_1738681, ILMN_1690487, ILMN_1750256, ILMN_1806818	712	253	12782	1.27723	1	0.80849	98.2107
GOTERM_CC_FAT	GO:0015630~microtubule cytoskeleton	35	2.89975	0.290026	ILMN_1761858, ILMN_1651942, ILMN_1750364, ILMN_1684754, ILMN_1669635, ILMN_1676737, ILMN_1742400, ILMN_1754407, ILMN_1667306, ILMN_1753890, ILMN_1738681, ILMN_1801421, ILMN_1690487, ILMN_1750256, ILMN_1725183, ILMN_1767894, ILMN_1684038, ILMN_1786328, ILMN_1807807, ILMN_1795852, ILMN_1730698, ILMN_1799951, ILMN_1720124, ILMN_1712452, ILMN_1695357, ILMN_1769118, ILMN_1718807, ILMN_1772455, ILMN_17…	712	549	12782	1.1445	1	0.845562	99.2464
SP_PIR_KEYWORDS	cytoskeleton	42	3.4797	0.431412	ILMN_1761858, ILMN_1651942, ILMN_1750364, ILMN_1684754, ILMN_1676980, ILMN_1669635, ILMN_1676737, ILMN_1742400, ILMN_1754407, ILMN_1677962, ILMN_1686846, ILMN_1684694, ILMN_1753890, ILMN_1738681, ILMN_1785424, ILMN_1690487, ILMN_1725183, ILMN_1651375, ILMN_1684038, ILMN_1807807, ILMN_1786328, ILMN_1667408, ILMN_1730698, ILMN_1674265, ILMN_1657016, ILMN_1797342, ILMN_1720124, ILMN_1704369, ILMN_17…	1200	636	19235	1.05853	1	0.925018	99.9682
GOTERM_CC_FAT	GO:0005856~cytoskeleton	73	6.04805	0.743104	ILMN_1651942, ILMN_1746577, ILMN_1669635, ILMN_1808789, ILMN_1745994, ILMN_1664172, ILMN_1657164, ILMN_1754407, ILMN_1768052, ILMN_1738681, ILMN_1801421, ILMN_1750256, ILMN_1716093, ILMN_1767894, ILMN_1651375, ILMN_1684038, ILMN_1667408, ILMN_1786328, ILMN_1730698, ILMN_1674265, ILMN_1692973, ILMN_1797342, ILMN_1717165, ILMN_1769234, ILMN_1813846, ILMN_1695357, ILMN_1770641, ILMN_1718807, ILMN_17…	712	1381	12782	0.94896	1	0.992294	100
GOTERM_CC_FAT	GO:0044430~cytoskeletal part	48	3.9768	0.828268	ILMN_1761858, ILMN_1651942, ILMN_1734054, ILMN_1750364, ILMN_1684754, ILMN_1669635, ILMN_1745994, ILMN_1808789, ILMN_1676737, ILMN_1742400, ILMN_1754407, ILMN_1667306, ILMN_1753890, ILMN_1738681, ILMN_1801421, ILMN_1716093, ILMN_1750256, ILMN_1690487, ILMN_1725973, ILMN_1781155, ILMN_1725183, ILMN_1797367, ILMN_1767894, ILMN_1684038, ILMN_1667408, ILMN_1807807, ILMN_1786328, ILMN_1795852, ILMN_17…	712	952	12782	0.905155	1	0.996779	100
Annotation Cluster 147	Enrichment Score: 0.43892322609977075
Category	Term	Count	%	PValue	Genes	List Total	Pop Hits	Pop Total	Fold Enrichment	Bonferroni	Benjamini	FDR
UP_SEQ_FEATURE	zinc finger region:C3H1-type	4	0.3314	0.220978	ILMN_1789616, ILMN_1803590, ILMN_1760256, ILMN_1732226	1199	26	19113	2.45243	1	0.997833	98.8847
INTERPRO	IPR000571:Zinc finger, CCCH-type	6	0.4971	0.246226	ILMN_1789616, ILMN_1693227, ILMN_1760256, ILMN_1671583, ILMN_1663727, ILMN_1732226	1081	52	16659	1.77816	1	0.993718	99.0573
UP_SEQ_FEATURE	zinc finger region:C3H1-type 3	3	0.24855	0.35957	ILMN_1693227, ILMN_1671583, ILMN_1663727	1199	20	19113	2.39112	1	0.999918	99.9672
SMART	SM00356:ZnF_C3H1	6	0.4971	0.367062	ILMN_1789616, ILMN_1693227, ILMN_1760256, ILMN_1671583, ILMN_1663727, ILMN_1732226	696	52	9079	1.50514	1	0.971979	99.7763
UP_SEQ_FEATURE	zinc finger region:C3H1-type 1	3	0.24855	0.569021	ILMN_1693227, ILMN_1671583, ILMN_1663727	1199	30	19113	1.59408	1	1	100
UP_SEQ_FEATURE	zinc finger region:C3H1-type 2	3	0.24855	0.569021	ILMN_1693227, ILMN_1671583, ILMN_1663727	1199	30	19113	1.59408	1	1	100
Annotation Cluster 148	Enrichment Score: 0.43356150156700884
Category	Term	Count	%	PValue	Genes	List Total	Pop Hits	Pop Total	Fold Enrichment	Bonferroni	Benjamini	FDR
GOTERM_MF_FAT	GO:0005484~SNAP receptor activity	4	0.3314	0.163316	ILMN_1692773, ILMN_1712631, ILMN_1659544, ILMN_1753712	872	21	12983	2.83595	1	0.852178	93.6555
GOTERM_CC_FAT	GO:0031201~SNARE complex	3	0.24855	0.285666	ILMN_1692773, ILMN_1712631, ILMN_1659544	712	19	12782	2.83457	1	0.843729	99.1776
KEGG_PATHWAY	hsa04130:SNARE interactions in vesicular transport	4	0.3314	0.400933	ILMN_1692773, ILMN_1712631, ILMN_1659544, ILMN_1753712	306	38	5085	1.74923	1	0.908931	99.793
UP_SEQ_FEATURE	domain:t-SNARE coiled-coil homology	3	0.24855	0.405175	ILMN_1692773, ILMN_1659544, ILMN_1753712	1199	22	19113	2.17374	1	0.999973	99.9913
INTERPRO	IPR000727:Target SNARE coiled-coil region	3	0.24855	0.530071	ILMN_1692773, ILMN_1659544, ILMN_1753712	1081	27	16659	1.7123	1	0.999923	99.9996
SMART	SM00397:t_SNARE	3	0.24855	0.623297	ILMN_1692773, ILMN_1659544, ILMN_1753712	696	27	9079	1.44939	1	0.995344	99.9998
Annotation Cluster 149	Enrichment Score: 0.4313033287134719
Category	Term	Count	%	PValue	Genes	List Total	Pop Hits	Pop Total	Fold Enrichment	Bonferroni	Benjamini	FDR
SP_PIR_KEYWORDS	CBS domain	3	0.24855	0.333809	ILMN_1688633, ILMN_1655720, ILMN_1804735	1200	19	19235	2.53092	1	0.887518	99.6956
INTERPRO	IPR000644:Cystathionine beta-synthase, core	3	0.24855	0.351583	ILMN_1688633, ILMN_1655720, ILMN_1804735	1081	19	16659	2.43327	1	0.998542	99.9214
SMART	SM00116:CBS	3	0.24855	0.433076	ILMN_1688633, ILMN_1655720, ILMN_1804735	696	19	9079	2.05966	1	0.980157	99.9485
Annotation Cluster 150	Enrichment Score: 0.42820150456193756
Category	Term	Count	%	PValue	Genes	List Total	Pop Hits	Pop Total	Fold Enrichment	Bonferroni	Benjamini	FDR
KEGG_PATHWAY	hsa04120:Ubiquitin mediated proteolysis	12	0.9942	0.197719	ILMN_1761858, ILMN_1704342, ILMN_1763575, ILMN_1685580, ILMN_1741253, ILMN_1695792, ILMN_1801605, ILMN_1665538, ILMN_1799688, ILMN_1810474, ILMN_1675497, ILMN_1780598	306	137	5085	1.45556	1	0.857149	92.9856
GOTERM_MF_FAT	GO:0016879~ligase activity, forming carbon-nitrogen bonds	19	1.57415	0.288472	ILMN_1747419, ILMN_1704342, ILMN_1745887, ILMN_1801605, ILMN_1772521, ILMN_1799688, ILMN_1653828, ILMN_1666399, ILMN_1810474, ILMN_1679158, ILMN_1747146, ILMN_1675497, ILMN_1780598, ILMN_1691444, ILMN_1799389, ILMN_1741253, ILMN_1679476, ILMN_1778160, ILMN_1775872	872	231	12983	1.22462	1	0.948791	99.4822
GOTERM_MF_FAT	GO:0019787~small conjugating protein ligase activity	14	1.1599	0.322227	ILMN_1747419, ILMN_1704342, ILMN_1745887, ILMN_1801605, ILMN_1799688, ILMN_1653828, ILMN_1810474, ILMN_1666399, ILMN_1747146, ILMN_1675497, ILMN_1691444, ILMN_1780598, ILMN_1799389, ILMN_1741253	872	166	12983	1.25568	1	0.959172	99.7558
GOTERM_MF_FAT	GO:0016881~acid-amino acid ligase activity	14	1.1599	0.59571	ILMN_1747419, ILMN_1704342, ILMN_1745887, ILMN_1801605, ILMN_1799688, ILMN_1653828, ILMN_1810474, ILMN_1666399, ILMN_1747146, ILMN_1675497, ILMN_1691444, ILMN_1780598, ILMN_1799389, ILMN_1741253	872	201	12983	1.03703	1	0.996298	99.9999
GOTERM_MF_FAT	GO:0004842~ubiquitin-protein ligase activity	10	0.8285	0.660151	ILMN_1799389, ILMN_1704342, ILMN_1747419, ILMN_1745887, ILMN_1741253, ILMN_1801605, ILMN_1653828, ILMN_1799688, ILMN_1666399, ILMN_1691444	872	147	12983	1.01284	1	0.998091	100
Annotation Cluster 151	Enrichment Score: 0.4261524084892062
Category	Term	Count	%	PValue	Genes	List Total	Pop Hits	Pop Total	Fold Enrichment	Bonferroni	Benjamini	FDR
UP_SEQ_FEATURE	domain:PDZ 4	4	0.3314	0.0634997	ILMN_1813572, ILMN_1773312, ILMN_1708341, ILMN_1702124, ILMN_1747318, ILMN_1724666	1199	15	19113	4.25088	1	0.88475	69.3092
INTERPRO	IPR004172:L27	3	0.24855	0.204524	ILMN_1773312, ILMN_1724754, ILMN_1747318, ILMN_1724666, ILMN_1705579	1081	13	16659	3.55632	1	0.988927	97.7078
UP_SEQ_FEATURE	domain:PDZ 3	4	0.3314	0.255057	ILMN_1813572, ILMN_1773312, ILMN_1708341, ILMN_1702124, ILMN_1747318, ILMN_1724666	1199	28	19113	2.27725	1	0.99904	99.5016
SMART	SM00569:L27	3	0.24855	0.262168	ILMN_1773312, ILMN_1724754, ILMN_1747318, ILMN_1724666, ILMN_1705579	696	13	9079	3.01028	1	0.940505	98.2693
UP_SEQ_FEATURE	domain:PDZ 1	4	0.3314	0.462345	ILMN_1813572, ILMN_1773312, ILMN_1708341, ILMN_1702124, ILMN_1747318, ILMN_1724666	1199	40	19113	1.59408	1	0.999994	99.9986
UP_SEQ_FEATURE	domain:PDZ 2	4	0.3314	0.462345	ILMN_1813572, ILMN_1773312, ILMN_1708341, ILMN_1702124, ILMN_1747318, ILMN_1724666	1199	40	19113	1.59408	1	0.999994	99.9986
INTERPRO	IPR001478:PDZ/DHR/GLGF	8	0.6628	0.85679	ILMN_1813572, ILMN_1773312, ILMN_1708341, ILMN_1702124, ILMN_1652163, ILMN_1724754, ILMN_1725992, ILMN_1747318, ILMN_1724666, ILMN_1705579	1081	149	16659	0.827422	1	1	100
SMART	SM00228:PDZ	8	0.6628	0.945089	ILMN_1813572, ILMN_1773312, ILMN_1708341, ILMN_1702124, ILMN_1652163, ILMN_1724754, ILMN_1725992, ILMN_1747318, ILMN_1724666, ILMN_1705579	696	149	9079	0.700378	1	0.999986	100
UP_SEQ_FEATURE	domain:PDZ	4	0.3314	0.971885	ILMN_1652163, ILMN_1724754, ILMN_1725992, ILMN_1705579	1199	110	19113	0.579665	1	1	100
Annotation Cluster 152	Enrichment Score: 0.41848788464225506
Category	Term	Count	%	PValue	Genes	List Total	Pop Hits	Pop Total	Fold Enrichment	Bonferroni	Benjamini	FDR
INTERPRO	IPR000306:Zinc finger, FYVE-type	4	0.3314	0.30777	ILMN_1735364, ILMN_1798061, ILMN_1739641, ILMN_1801464, ILMN_1707872	1081	30	16659	2.05476	1	0.997139	99.7688
INTERPRO	IPR017455:Zinc finger, FYVE-related	4	0.3314	0.380229	ILMN_1735364, ILMN_1798061, ILMN_1739641, ILMN_1801464, ILMN_1707872	1081	34	16659	1.81303	1	0.999078	99.9627
SMART	SM00064:FYVE	4	0.3314	0.406205	ILMN_1735364, ILMN_1798061, ILMN_1739641, ILMN_1801464, ILMN_1707872	696	30	9079	1.73927	1	0.977078	99.9046
UP_SEQ_FEATURE	zinc finger region:FYVE-type	4	0.3314	0.44569	ILMN_1735364, ILMN_1798061, ILMN_1739641, ILMN_1801464, ILMN_1707872	1199	39	19113	1.63495	1	0.99999	99.9976
Annotation Cluster 153	Enrichment Score: 0.41081404533141486
Category	Term	Count	%	PValue	Genes	List Total	Pop Hits	Pop Total	Fold Enrichment	Bonferroni	Benjamini	FDR
SP_PIR_KEYWORDS	selenium	4	0.3314	0.304299	ILMN_1696133, ILMN_1657893, ILMN_1673369, ILMN_1769787	1200	31	19235	2.06828	1	0.864357	99.4352
GOTERM_MF_FAT	GO:0008430~selenium binding	4	0.3314	0.364314	ILMN_1696133, ILMN_1657893, ILMN_1673369, ILMN_1769787	872	32	12983	1.8611	1	0.970415	99.9094
SP_PIR_KEYWORDS	selenocysteine	3	0.24855	0.528179	ILMN_1696133, ILMN_1657893, ILMN_1769787	1200	28	19235	1.71741	1	0.96025	99.9978
Annotation Cluster 154	Enrichment Score: 0.40361236609906176
Category	Term	Count	%	PValue	Genes	List Total	Pop Hits	Pop Total	Fold Enrichment	Bonferroni	Benjamini	FDR
GOTERM_BP_FAT	GO:0035270~endocrine system development	7	0.57995	0.296276	ILMN_1690122, ILMN_1726387, ILMN_1669425, ILMN_1745470, ILMN_1797668, ILMN_1762085, ILMN_1789905	886	69	13528	1.54899	1	0.985727	99.8079
GOTERM_BP_FAT	GO:0031018~endocrine pancreas development	3	0.24855	0.306709	ILMN_1669425, ILMN_1745470, ILMN_1797668	886	17	13528	2.69446	1	0.987367	99.8528
GOTERM_BP_FAT	GO:0031016~pancreas development	3	0.24855	0.677235	ILMN_1669425, ILMN_1745470, ILMN_1797668	886	35	13528	1.30874	1	0.999685	100
Annotation Cluster 155	Enrichment Score: 0.3957804587213695
Category	Term	Count	%	PValue	Genes	List Total	Pop Hits	Pop Total	Fold Enrichment	Bonferroni	Benjamini	FDR
GOTERM_BP_FAT	GO:0042384~cilium assembly	4	0.3314	0.276162	ILMN_1761828, ILMN_1715647, ILMN_1773567, ILMN_1690487	886	28	13528	2.18123	1	0.981977	99.6828
GOTERM_BP_FAT	GO:0060271~cilium morphogenesis	4	0.3314	0.367641	ILMN_1761828, ILMN_1715647, ILMN_1773567, ILMN_1690487	886	33	13528	1.85074	1	0.993167	99.9714
GOTERM_BP_FAT	GO:0030031~cell projection assembly	6	0.4971	0.639839	ILMN_1761828, ILMN_1715647, ILMN_1773567, ILMN_1676980, ILMN_1690487, ILMN_1669635	886	83	13528	1.10376	1	0.999559	100
Annotation Cluster 156	Enrichment Score: 0.3957699806832936
Category	Term	Count	%	PValue	Genes	List Total	Pop Hits	Pop Total	Fold Enrichment	Bonferroni	Benjamini	FDR
UP_SEQ_FEATURE	domain:PID	4	0.3314	0.255057	ILMN_1813669, ILMN_1705114, ILMN_1809040, ILMN_1765076	1199	28	19113	2.27725	1	0.99904	99.5016
INTERPRO	IPR006020:Phosphotyrosine interaction region	4	0.3314	0.450914	ILMN_1813669, ILMN_1705114, ILMN_1809040, ILMN_1765076	1081	38	16659	1.62218	1	0.999694	99.9949
SMART	SM00462:PTB	4	0.3314	0.564885	ILMN_1813669, ILMN_1705114, ILMN_1809040, ILMN_1765076	696	38	9079	1.37311	1	0.99214	99.9985
Annotation Cluster 157	Enrichment Score: 0.3856712159923232
Category	Term	Count	%	PValue	Genes	List Total	Pop Hits	Pop Total	Fold Enrichment	Bonferroni	Benjamini	FDR
UP_SEQ_FEATURE	domain:FCH	3	0.24855	0.35957	ILMN_1702396, ILMN_1745994, ILMN_1797342	1199	20	19113	2.39112	1	0.999918	99.9672
INTERPRO	IPR001060:Fps/Fes/Fer/CIP4 homology	3	0.24855	0.399036	ILMN_1702396, ILMN_1745994, ILMN_1797342	1081	21	16659	2.20153	1	0.999265	99.9776
SMART	SM00055:FCH	3	0.24855	0.485503	ILMN_1702396, ILMN_1745994, ILMN_1797342	696	21	9079	1.86351	1	0.986306	99.9859
Annotation Cluster 158	Enrichment Score: 0.38145294540813
Category	Term	Count	%	PValue	Genes	List Total	Pop Hits	Pop Total	Fold Enrichment	Bonferroni	Benjamini	FDR
GOTERM_BP_FAT	GO:0043087~regulation of GTPase activity	13	1.07705	0.106948	ILMN_1723475, ILMN_1797367, ILMN_1737314, ILMN_1793332, ILMN_1726387, ILMN_1731287, ILMN_1727171, ILMN_1725992, ILMN_1751779, ILMN_1744240, ILMN_1750256, ILMN_1742869, ILMN_1769031	886	123	13528	1.61376	1	0.861499	86.6493
GOTERM_BP_FAT	GO:0032318~regulation of Ras GTPase activity	11	0.91135	0.142142	ILMN_1723475, ILMN_1726387, ILMN_1737314, ILMN_1797367, ILMN_1731287, ILMN_1727171, ILMN_1744240, ILMN_1751779, ILMN_1750256, ILMN_1769031, ILMN_1742869	886	104	13528	1.61495	1	0.910609	93.4739
GOTERM_BP_FAT	GO:0032483~regulation of Rab protein signal transduction	5	0.41425	0.370002	ILMN_1723475, ILMN_1744240, ILMN_1751779, ILMN_1750256, ILMN_1742869	886	47	13528	1.62432	1	0.993307	99.9732
GOTERM_BP_FAT	GO:0032313~regulation of Rab GTPase activity	5	0.41425	0.370002	ILMN_1723475, ILMN_1744240, ILMN_1751779, ILMN_1750256, ILMN_1742869	886	47	13528	1.62432	1	0.993307	99.9732
UP_SEQ_FEATURE	domain:Rab-GAP TBC	4	0.3314	0.51091	ILMN_1723475, ILMN_1744240, ILMN_1751779, ILMN_1742869	1199	43	19113	1.48286	1	0.999999	99.9997
INTERPRO	IPR000195:RabGAP/TBC	4	0.3314	0.53416	ILMN_1723475, ILMN_1744240, ILMN_1751779, ILMN_1742869	1081	43	16659	1.43356	1	0.999925	99.9997
GOTERM_MF_FAT	GO:0005097~Rab GTPase activator activity	4	0.3314	0.633541	ILMN_1723475, ILMN_1744240, ILMN_1751779, ILMN_1742869	872	48	12983	1.24073	1	0.997384	100
SMART	SM00164:TBC	4	0.3314	0.649871	ILMN_1723475, ILMN_1744240, ILMN_1751779, ILMN_1742869	696	43	9079	1.21345	1	0.996542	99.9999
GOTERM_MF_FAT	GO:0005099~Ras GTPase activator activity	6	0.4971	0.739127	ILMN_1723475, ILMN_1726387, ILMN_1744240, ILMN_1751779, ILMN_1727205, ILMN_1742869	872	91	12983	0.981677	1	0.999289	100
GOTERM_MF_FAT	GO:0005083~small GTPase regulator activity	15	1.24275	0.886812	ILMN_1723475, ILMN_1799796, ILMN_1779347, ILMN_1796912, ILMN_1712066, ILMN_1755016, ILMN_1726387, ILMN_1667306, ILMN_1731287, ILMN_1768052, ILMN_1751779, ILMN_1744240, ILMN_1727205, ILMN_1750256, ILMN_1742869, ILMN_1732371	872	274	12983	0.815078	1	0.99997	100
Annotation Cluster 159	Enrichment Score: 0.3796217889403839
Category	Term	Count	%	PValue	Genes	List Total	Pop Hits	Pop Total	Fold Enrichment	Bonferroni	Benjamini	FDR
BIOCARTA	h_nfkbPathway:NF-kB Signaling Pathway	5	0.41425	0.0880308	ILMN_1714965, ILMN_1738523, ILMN_1657937, ILMN_1707308, ILMN_1727142	114	22	1437	2.86483	1	0.751077	67.3617
GOTERM_BP_FAT	GO:0051099~positive regulation of binding	8	0.6628	0.247904	ILMN_1814173, ILMN_1758823, ILMN_1738523, ILMN_1657937, ILMN_1667408, ILMN_1727142, ILMN_1716480, ILMN_1710598	886	78	13528	1.56601	1	0.974653	99.3728
GOTERM_BP_FAT	GO:0043388~positive regulation of DNA binding	7	0.57995	0.3079	ILMN_1814173, ILMN_1758823, ILMN_1738523, ILMN_1657937, ILMN_1727142, ILMN_1716480, ILMN_1710598	886	70	13528	1.52686	1	0.987383	99.8572
GOTERM_BP_FAT	GO:0051098~regulation of binding	12	0.9942	0.418066	ILMN_1814173, ILMN_1758823, ILMN_1738523, ILMN_1809040, ILMN_1815941, ILMN_1812795, ILMN_1657937, ILMN_1667408, ILMN_1741477, ILMN_1727142, ILMN_1716480, ILMN_1710598	886	153	13528	1.19754	1	0.996294	99.9935
GOTERM_BP_FAT	GO:0051101~regulation of DNA binding	9	0.74565	0.540169	ILMN_1814173, ILMN_1758823, ILMN_1738523, ILMN_1815941, ILMN_1812795, ILMN_1657937, ILMN_1727142, ILMN_1716480, ILMN_1710598	886	121	13528	1.13568	1	0.998664	99.9999
GOTERM_BP_FAT	GO:0051091~positive regulation of transcription factor activity	5	0.41425	0.558417	ILMN_1814173, ILMN_1758823, ILMN_1738523, ILMN_1657937, ILMN_1727142	886	60	13528	1.27239	1	0.998878	100
KEGG_PATHWAY	hsa04620:Toll-like receptor signaling pathway	6	0.4971	0.733667	ILMN_1714965, ILMN_1738523, ILMN_1657937, ILMN_1707308, ILMN_1776703, ILMN_1727142	306	101	5085	0.987187	1	0.97504	100
GOTERM_BP_FAT	GO:0051092~positive regulation of NF-kappaB transcription factor activity	3	0.24855	0.758921	ILMN_1738523, ILMN_1657937, ILMN_1727142	886	41	13528	1.11722	1	0.999903	100
GOTERM_BP_FAT	GO:0051090~regulation of transcription factor activity	6	0.4971	0.812173	ILMN_1814173, ILMN_1758823, ILMN_1738523, ILMN_1815941, ILMN_1657937, ILMN_1727142	886	103	13528	0.889434	1	0.999958	100
Annotation Cluster 160	Enrichment Score: 0.3695317600412535
Category	Term	Count	%	PValue	Genes	List Total	Pop Hits	Pop Total	Fold Enrichment	Bonferroni	Benjamini	FDR
GOTERM_BP_FAT	GO:0021543~pallium development	5	0.41425	0.354819	ILMN_1800642, ILMN_1726387, ILMN_1754407, ILMN_1797367, ILMN_1789905	886	46	13528	1.65963	1	0.992444	99.9591
GOTERM_BP_FAT	GO:0021987~cerebral cortex development	4	0.3314	0.367641	ILMN_1800642, ILMN_1726387, ILMN_1754407, ILMN_1797367	886	33	13528	1.85074	1	0.993167	99.9714
GOTERM_BP_FAT	GO:0030900~forebrain development	12	0.9942	0.409552	ILMN_1800642, ILMN_1804948, ILMN_1814173, ILMN_1726387, ILMN_1754407, ILMN_1797367, ILMN_1710482, ILMN_1705114, ILMN_1659463, ILMN_1777663, ILMN_1778991, ILMN_1789905	886	152	13528	1.20542	1	0.995871	99.9916
GOTERM_BP_FAT	GO:0021537~telencephalon development	5	0.41425	0.622491	ILMN_1800642, ILMN_1726387, ILMN_1754407, ILMN_1797367, ILMN_1789905	886	65	13528	1.17451	1	0.999469	100
Annotation Cluster 161	Enrichment Score: 0.36457813151662083
Category	Term	Count	%	PValue	Genes	List Total	Pop Hits	Pop Total	Fold Enrichment	Bonferroni	Benjamini	FDR
INTERPRO	IPR014847:FERM adjacent (FA)	3	0.24855	0.204524	ILMN_1770245, ILMN_1667408, ILMN_1768052	1081	13	16659	3.55632	1	0.988927	97.7078
INTERPRO	IPR018980:FERM, C-terminal PH-like domain	4	0.3314	0.218451	ILMN_1769234, ILMN_1770245, ILMN_1667408, ILMN_1768052	1081	25	16659	2.46572	1	0.991082	98.2873
INTERPRO	IPR014352:FERM/acyl-CoA-binding protein, 3-helical bundle	5	0.41425	0.303543	ILMN_1769234, ILMN_1770245, ILMN_1667408, ILMN_1768052, ILMN_1684271	1081	43	16659	1.79195	1	0.997047	99.7444
INTERPRO	IPR018979:FERM, N-terminal	4	0.3314	0.30777	ILMN_1769234, ILMN_1770245, ILMN_1667408, ILMN_1768052	1081	30	16659	2.05476	1	0.997139	99.7688
INTERPRO	IPR000798:Ezrin/radixin/moesin ERM	3	0.24855	0.32736	ILMN_1770245, ILMN_1667408, ILMN_1768052	1081	18	16659	2.56846	1	0.997919	99.856
INTERPRO	IPR019750:Band 4.1 subgroup	3	0.24855	0.488549	ILMN_1770245, ILMN_1667408, ILMN_1768052	1081	25	16659	1.84929	1	0.999836	99.9984
UP_SEQ_FEATURE	domain:FERM	4	0.3314	0.586322	ILMN_1769234, ILMN_1770245, ILMN_1667408, ILMN_1768052	1199	48	19113	1.3284	1	1	100
INTERPRO	IPR019748:FERM central domain	4	0.3314	0.595325	ILMN_1769234, ILMN_1770245, ILMN_1667408, ILMN_1768052	1081	47	16659	1.31155	1	0.999973	100
INTERPRO	IPR000299:FERM domain	4	0.3314	0.595325	ILMN_1769234, ILMN_1770245, ILMN_1667408, ILMN_1768052	1081	47	16659	1.31155	1	0.999973	100
INTERPRO	IPR019749:Band 4.1 domain	4	0.3314	0.63762	ILMN_1769234, ILMN_1770245, ILMN_1667408, ILMN_1768052	1081	50	16659	1.23286	1	0.999989	100
INTERPRO	IPR019747:FERM conserved site	4	0.3314	0.63762	ILMN_1769234, ILMN_1770245, ILMN_1667408, ILMN_1768052	1081	50	16659	1.23286	1	0.999989	100
SMART	SM00295:B41	4	0.3314	0.747854	ILMN_1769234, ILMN_1770245, ILMN_1667408, ILMN_1768052	696	50	9079	1.04356	1	0.998489	100
Annotation Cluster 162	Enrichment Score: 0.36413518670937384
Category	Term	Count	%	PValue	Genes	List Total	Pop Hits	Pop Total	Fold Enrichment	Bonferroni	Benjamini	FDR
PUBMED_ID	12761501	8	0.6628	0.114093	ILMN_1674260, ILMN_1738523, ILMN_1657937, ILMN_1789830, ILMN_1690398, ILMN_1731043, ILMN_1686454, ILMN_1682232	1207	93	27491	1.95925	1	0.999998	92.7745
GOTERM_BP_FAT	GO:0043122~regulation of I-kappaB kinase/NF-kappaB cascade	10	0.8285	0.265797	ILMN_1659189, ILMN_1674260, ILMN_1738523, ILMN_1657937, ILMN_1789830, ILMN_1690398, ILMN_1738681, ILMN_1682232, ILMN_1727142, ILMN_1654376	886	107	13528	1.42697	1	0.980348	99.5914
GOTERM_BP_FAT	GO:0010627~regulation of protein kinase cascade	20	1.657	0.27557	ILMN_1659189, ILMN_1781155, ILMN_1738523, ILMN_1657937, ILMN_1690398, ILMN_1670547, ILMN_1682232, ILMN_1654376, ILMN_1726387, ILMN_1674260, ILMN_1772455, ILMN_1788107, ILMN_1727171, ILMN_1789830, ILMN_1738681, ILMN_1762531, ILMN_1701134, ILMN_1804735, ILMN_1769031, ILMN_1727142	886	249	13528	1.2264	1	0.982126	99.6782
GOTERM_BP_FAT	GO:0043123~positive regulation of I-kappaB kinase/NF-kappaB cascade	7	0.57995	0.615733	ILMN_1674260, ILMN_1738523, ILMN_1657937, ILMN_1789830, ILMN_1690398, ILMN_1738681, ILMN_1682232	886	97	13528	1.10186	1	0.99944	100
GOTERM_BP_FAT	GO:0010740~positive regulation of protein kinase cascade	11	0.91135	0.659817	ILMN_1781155, ILMN_1674260, ILMN_1738523, ILMN_1657937, ILMN_1788107, ILMN_1789830, ILMN_1690398, ILMN_1762531, ILMN_1738681, ILMN_1682232, ILMN_1769031	886	167	13528	1.00572	1	0.999619	100
GOTERM_BP_FAT	GO:0009967~positive regulation of signal transduction	16	1.3256	0.876104	ILMN_1781155, ILMN_1738523, ILMN_1657937, ILMN_1690398, ILMN_1682232, ILMN_1813846, ILMN_1800642, ILMN_1674260, ILMN_1788107, ILMN_1727171, ILMN_1741477, ILMN_1789830, ILMN_1762531, ILMN_1738681, ILMN_1750256, ILMN_1769031	886	295	13528	0.828129	1	0.999988	100
GOTERM_BP_FAT	GO:0010647~positive regulation of cell communication	16	1.3256	0.94982	ILMN_1781155, ILMN_1738523, ILMN_1657937, ILMN_1690398, ILMN_1682232, ILMN_1813846, ILMN_1800642, ILMN_1674260, ILMN_1788107, ILMN_1727171, ILMN_1741477, ILMN_1789830, ILMN_1762531, ILMN_1738681, ILMN_1750256, ILMN_1769031	886	329	13528	0.742547	1	0.999999	100
Annotation Cluster 163	Enrichment Score: 0.36317875852002873
Category	Term	Count	%	PValue	Genes	List Total	Pop Hits	Pop Total	Fold Enrichment	Bonferroni	Benjamini	FDR
UP_SEQ_FEATURE	domain:CH	5	0.41425	0.268263	ILMN_1785141, ILMN_1779185, ILMN_1796912, ILMN_1757336, ILMN_1683692	1199	42	19113	1.89771	1	0.999254	99.6388
INTERPRO	IPR001715:Calponin-like actin-binding	7	0.57995	0.300623	ILMN_1785141, ILMN_1779185, ILMN_1796912, ILMN_1663106, ILMN_1757336, ILMN_1754579, ILMN_1683692	1081	70	16659	1.54107	1	0.997237	99.7261
SMART	SM00033:CH	7	0.57995	0.449322	ILMN_1785141, ILMN_1779185, ILMN_1796912, ILMN_1663106, ILMN_1757336, ILMN_1754579, ILMN_1683692	696	70	9079	1.30445	1	0.982174	99.9651
UP_SEQ_FEATURE	repeat:LRR 9	5	0.41425	0.973073	ILMN_1777708, ILMN_1758778, ILMN_1757336, ILMN_1754579, ILMN_1683692	1199	135	19113	0.590399	1	1	100
Annotation Cluster 164	Enrichment Score: 0.3623414183011799
Category	Term	Count	%	PValue	Genes	List Total	Pop Hits	Pop Total	Fold Enrichment	Bonferroni	Benjamini	FDR
GOTERM_BP_FAT	GO:0048199~vesicle targeting, to, from or within Golgi	3	0.24855	0.182969	ILMN_1728535, ILMN_1781386, ILMN_1699703	886	12	13528	3.81716	1	0.943934	97.2606
GOTERM_BP_FAT	GO:0051640~organelle localization	8	0.6628	0.396704	ILMN_1695357, ILMN_1728535, ILMN_1754407, ILMN_1781386, ILMN_1699703, ILMN_1799688, ILMN_1726392, ILMN_1788363	886	92	13528	1.32771	1	0.995533	99.9876
GOTERM_BP_FAT	GO:0006903~vesicle targeting	3	0.24855	0.426791	ILMN_1728535, ILMN_1781386, ILMN_1699703	886	22	13528	2.08208	1	0.99647	99.995
GOTERM_BP_FAT	GO:0051656~establishment of organelle localization	6	0.4971	0.474053	ILMN_1695357, ILMN_1728535, ILMN_1781386, ILMN_1699703, ILMN_1799688, ILMN_1788363	886	69	13528	1.32771	1	0.997476	99.9989
GOTERM_BP_FAT	GO:0051650~establishment of vesicle localization	3	0.24855	0.64539	ILMN_1728535, ILMN_1781386, ILMN_1699703	886	33	13528	1.38806	1	0.999564	100
GOTERM_BP_FAT	GO:0051648~vesicle localization	3	0.24855	0.70671	ILMN_1728535, ILMN_1781386, ILMN_1699703	886	37	13528	1.238	1	0.999787	100
Annotation Cluster 165	Enrichment Score: 0.3605532212731202
Category	Term	Count	%	PValue	Genes	List Total	Pop Hits	Pop Total	Fold Enrichment	Bonferroni	Benjamini	FDR
GOTERM_CC_FAT	GO:0000795~synaptonemal complex	4	0.3314	0.0966589	ILMN_1718807, ILMN_1751886, ILMN_1810474, ILMN_1788363	712	20	12782	3.59045	1	0.56045	76.5593
SP_PIR_KEYWORDS	meiosis	5	0.41425	0.336393	ILMN_1693145, ILMN_1718807, ILMN_1751886, ILMN_1769606, ILMN_1792305	1200	47	19235	1.70523	1	0.887049	99.7121
GOTERM_BP_FAT	GO:0007292~female gamete generation	6	0.4971	0.422029	ILMN_1651942, ILMN_1751886, ILMN_1681703, ILMN_1718629, ILMN_1748884, ILMN_1788363	886	65	13528	1.40941	1	0.996318	99.9942
GOTERM_BP_FAT	GO:0048477~oogenesis	4	0.3314	0.456948	ILMN_1651942, ILMN_1751886, ILMN_1681703, ILMN_1788363	886	38	13528	1.60722	1	0.996983	99.9981
GOTERM_BP_FAT	GO:0051327~M phase of meiotic cell cycle	6	0.4971	0.776623	ILMN_1651942, ILMN_1718807, ILMN_1751886, ILMN_1769606, ILMN_1788363, ILMN_1792305	886	98	13528	0.934814	1	0.999921	100
GOTERM_BP_FAT	GO:0007126~meiosis	6	0.4971	0.776623	ILMN_1651942, ILMN_1718807, ILMN_1751886, ILMN_1769606, ILMN_1788363, ILMN_1792305	886	98	13528	0.934814	1	0.999921	100
GOTERM_BP_FAT	GO:0051321~meiotic cell cycle	6	0.4971	0.791423	ILMN_1651942, ILMN_1718807, ILMN_1751886, ILMN_1769606, ILMN_1788363, ILMN_1792305	886	100	13528	0.916117	1	0.999941	100
Annotation Cluster 166	Enrichment Score: 0.3581634627932625
Category	Term	Count	%	PValue	Genes	List Total	Pop Hits	Pop Total	Fold Enrichment	Bonferroni	Benjamini	FDR
GOTERM_BP_FAT	GO:0043010~camera-type eye development	11	0.91135	0.161691	ILMN_1676010, ILMN_1792597, ILMN_1726387, ILMN_1669425, ILMN_1721729, ILMN_1778930, ILMN_1666399, ILMN_1810488, ILMN_1692261, ILMN_1745365, ILMN_1789905	886	107	13528	1.56967	1	0.927573	95.6705
GOTERM_BP_FAT	GO:0001654~eye development	11	0.91135	0.362699	ILMN_1676010, ILMN_1792597, ILMN_1726387, ILMN_1669425, ILMN_1721729, ILMN_1778930, ILMN_1666399, ILMN_1810488, ILMN_1692261, ILMN_1745365, ILMN_1789905	886	132	13528	1.27239	1	0.992853	99.9671
GOTERM_BP_FAT	GO:0048593~camera-type eye morphogenesis	4	0.3314	0.556294	ILMN_1676010, ILMN_1726387, ILMN_1666399, ILMN_1692261	886	44	13528	1.38806	1	0.99888	99.9999
GOTERM_BP_FAT	GO:0048592~eye morphogenesis	5	0.41425	0.669308	ILMN_1676010, ILMN_1726387, ILMN_1666399, ILMN_1692261, ILMN_1789905	886	69	13528	1.10642	1	0.999655	100
GOTERM_BP_FAT	GO:0007423~sensory organ development	14	1.1599	0.741347	ILMN_1792597, ILMN_1687567, ILMN_1778930, ILMN_1666399, ILMN_1810488, ILMN_1745365, ILMN_1789905, ILMN_1676010, ILMN_1726387, ILMN_1788232, ILMN_1669425, ILMN_1721729, ILMN_1692261, ILMN_1762531	886	229	13528	0.933453	1	0.999865	100
Annotation Cluster 167	Enrichment Score: 0.353672590687352
Category	Term	Count	%	PValue	Genes	List Total	Pop Hits	Pop Total	Fold Enrichment	Bonferroni	Benjamini	FDR
GOTERM_BP_FAT	GO:0043087~regulation of GTPase activity	13	1.07705	0.106948	ILMN_1723475, ILMN_1797367, ILMN_1737314, ILMN_1793332, ILMN_1726387, ILMN_1731287, ILMN_1727171, ILMN_1725992, ILMN_1751779, ILMN_1744240, ILMN_1750256, ILMN_1742869, ILMN_1769031	886	123	13528	1.61376	1	0.861499	86.6493
GOTERM_BP_FAT	GO:0032318~regulation of Ras GTPase activity	11	0.91135	0.142142	ILMN_1723475, ILMN_1726387, ILMN_1737314, ILMN_1797367, ILMN_1731287, ILMN_1727171, ILMN_1744240, ILMN_1751779, ILMN_1750256, ILMN_1769031, ILMN_1742869	886	104	13528	1.61495	1	0.910609	93.4739
GOTERM_BP_FAT	GO:0051056~regulation of small GTPase mediated signal transduction	22	1.8227	0.151011	ILMN_1723475, ILMN_1797367, ILMN_1737314, ILMN_1808850, ILMN_1779347, ILMN_1796912, ILMN_1671221, ILMN_1800642, ILMN_1755016, ILMN_1726387, ILMN_1731287, ILMN_1727171, ILMN_1768052, ILMN_1744240, ILMN_1725992, ILMN_1751779, ILMN_1681544, ILMN_1727205, ILMN_1738681, ILMN_1750256, ILMN_1769031, ILMN_1742869, ILMN_1732371	886	252	13528	1.33298	1	0.920676	94.5762
GOTERM_BP_FAT	GO:0046578~regulation of Ras protein signal transduction	16	1.3256	0.400559	ILMN_1723475, ILMN_1797367, ILMN_1737314, ILMN_1796912, ILMN_1755016, ILMN_1726387, ILMN_1731287, ILMN_1727171, ILMN_1768052, ILMN_1751779, ILMN_1744240, ILMN_1727205, ILMN_1738681, ILMN_1750256, ILMN_1769031, ILMN_1742869, ILMN_1732371	886	210	13528	1.16332	1	0.995553	99.9889
GOTERM_MF_FAT	GO:0060589~nucleoside-triphosphatase regulator activity	30	2.4855	0.429413	ILMN_1674135, ILMN_1799796, ILMN_1796912, ILMN_1671221, ILMN_1753716, ILMN_1726387, ILMN_1774110, ILMN_1731287, ILMN_1667306, ILMN_1768052, ILMN_1744240, ILMN_1681544, ILMN_1750256, ILMN_1723475, ILMN_1688534, ILMN_1721138, ILMN_1797367, ILMN_1808850, ILMN_1779347, ILMN_1793332, ILMN_1763704, ILMN_1712066, ILMN_1671921, ILMN_1755016, ILMN_1663532, ILMN_1727171, ILMN_1751779, ILMN_1725992, ILMN_17…	872	413	12983	1.08151	1	0.982784	99.983
GOTERM_MF_FAT	GO:0030695~GTPase regulator activity	29	2.40265	0.46708	ILMN_1674135, ILMN_1799796, ILMN_1796912, ILMN_1671221, ILMN_1753716, ILMN_1726387, ILMN_1774110, ILMN_1731287, ILMN_1667306, ILMN_1768052, ILMN_1744240, ILMN_1681544, ILMN_1750256, ILMN_1723475, ILMN_1688534, ILMN_1797367, ILMN_1808850, ILMN_1779347, ILMN_1793332, ILMN_1712066, ILMN_1763704, ILMN_1671921, ILMN_1755016, ILMN_1663532, ILMN_1727171, ILMN_1751779, ILMN_1725992, ILMN_1727205, ILMN_17…	872	404	12983	1.06875	1	0.986886	99.9941
SP_PIR_KEYWORDS	GTPase activation	10	0.8285	0.66507	ILMN_1723475, ILMN_1726387, ILMN_1774110, ILMN_1808850, ILMN_1731287, ILMN_1779347, ILMN_1751779, ILMN_1793332, ILMN_1671221, ILMN_1742869	1200	159	19235	1.00812	1	0.98389	100
GOTERM_MF_FAT	GO:0005099~Ras GTPase activator activity	6	0.4971	0.739127	ILMN_1723475, ILMN_1726387, ILMN_1744240, ILMN_1751779, ILMN_1727205, ILMN_1742869	872	91	12983	0.981677	1	0.999289	100
GOTERM_MF_FAT	GO:0005096~GTPase activator activity	13	1.07705	0.810206	ILMN_1723475, ILMN_1808850, ILMN_1779347, ILMN_1793332, ILMN_1763704, ILMN_1671221, ILMN_1726387, ILMN_1774110, ILMN_1731287, ILMN_1751779, ILMN_1744240, ILMN_1727205, ILMN_1742869	872	220	12983	0.87979	1	0.999832	100
GOTERM_MF_FAT	GO:0005083~small GTPase regulator activity	15	1.24275	0.886812	ILMN_1723475, ILMN_1799796, ILMN_1779347, ILMN_1796912, ILMN_1712066, ILMN_1755016, ILMN_1726387, ILMN_1667306, ILMN_1731287, ILMN_1768052, ILMN_1751779, ILMN_1744240, ILMN_1727205, ILMN_1750256, ILMN_1742869, ILMN_1732371	872	274	12983	0.815078	1	0.99997	100
GOTERM_MF_FAT	GO:0008047~enzyme activator activity	18	1.4913	0.91142	ILMN_1723475, ILMN_1808850, ILMN_1779347, ILMN_1793332, ILMN_1671046, ILMN_1763704, ILMN_1671221, ILMN_1654376, ILMN_1726387, ILMN_1774110, ILMN_1731287, ILMN_1659463, ILMN_1751779, ILMN_1744240, ILMN_1727205, ILMN_1750256, ILMN_1742869, ILMN_1732885	872	335	12983	0.799993	1	0.999983	100
GOTERM_BP_FAT	GO:0051336~regulation of hydrolase activity	16	1.3256	0.9602	ILMN_1723475, ILMN_1797367, ILMN_1737314, ILMN_1793332, ILMN_1654376, ILMN_1726387, ILMN_1812622, ILMN_1731287, ILMN_1659463, ILMN_1727171, ILMN_1725992, ILMN_1751779, ILMN_1744240, ILMN_1750256, ILMN_1742869, ILMN_1769031	886	337	13528	0.72492	1	1	100
Annotation Cluster 168	Enrichment Score: 0.329476645192538
Category	Term	Count	%	PValue	Genes	List Total	Pop Hits	Pop Total	Fold Enrichment	Bonferroni	Benjamini	FDR
UP_SEQ_FEATURE	domain:CARD	4	0.3314	0.272364	ILMN_1659189, ILMN_1736568, ILMN_1659463, ILMN_1654376	1199	29	19113	2.19873	1	0.999307	99.6736
INTERPRO	IPR001315:Caspase Recruitment	3	0.24855	0.569235	ILMN_1736568, ILMN_1659463, ILMN_1654376	1081	29	16659	1.59421	1	0.999956	99.9999
SMART	SM00114:CARD	3	0.24855	0.662414	ILMN_1736568, ILMN_1659463, ILMN_1654376	696	29	9079	1.34944	1	0.996847	99.9999
Annotation Cluster 169	Enrichment Score: 0.32277617830782873
Category	Term	Count	%	PValue	Genes	List Total	Pop Hits	Pop Total	Fold Enrichment	Bonferroni	Benjamini	FDR
UP_SEQ_FEATURE	domain:WW	3	0.24855	0.405175	ILMN_1685586, ILMN_1769473, ILMN_1745994	1199	22	19113	2.17374	1	0.999973	99.9913
INTERPRO	IPR001202:WW/Rsp5/WWP	5	0.41425	0.452783	ILMN_1685586, ILMN_1769473, ILMN_1750911, ILMN_1706839, ILMN_1745994	1081	53	16659	1.45384	1	0.999684	99.9952
SMART	SM00456:WW	5	0.41425	0.586326	ILMN_1685586, ILMN_1769473, ILMN_1750911, ILMN_1706839, ILMN_1745994	696	53	9079	1.23062	1	0.993536	99.9992
Annotation Cluster 170	Enrichment Score: 0.3156974280320622
Category	Term	Count	%	PValue	Genes	List Total	Pop Hits	Pop Total	Fold Enrichment	Bonferroni	Benjamini	FDR
INTERPRO	IPR001660:Sterile alpha motif SAM	9	0.74565	0.255006	ILMN_1743456, ILMN_1690690, ILMN_1813669, ILMN_1735301, ILMN_1796710, ILMN_1738449, ILMN_1659948, ILMN_1808047, ILMN_1800164, ILMN_1692261	1081	93	16659	1.49136	1	0.9942	99.223
SMART	SM00454:SAM	9	0.74565	0.419714	ILMN_1743456, ILMN_1690690, ILMN_1813669, ILMN_1735301, ILMN_1796710, ILMN_1738449, ILMN_1659948, ILMN_1808047, ILMN_1800164, ILMN_1692261	696	93	9079	1.26237	1	0.978689	99.9298
INTERPRO	IPR013761:Sterile alpha motif-type	6	0.4971	0.564336	ILMN_1743456, ILMN_1813669, ILMN_1735301, ILMN_1796710, ILMN_1808047, ILMN_1692261	1081	77	16659	1.20084	1	0.999961	99.9999
UP_SEQ_FEATURE	domain:SAM	6	0.4971	0.57935	ILMN_1690690, ILMN_1735301, ILMN_1796710, ILMN_1738449, ILMN_1808047, ILMN_1692261	1199	81	19113	1.1808	1	1	100
INTERPRO	IPR011510:Sterile alpha motif homology 2	3	0.24855	0.754276	ILMN_1735301, ILMN_1738449, ILMN_1659948, ILMN_1800164	1081	41	16659	1.12761	1	1	100
Annotation Cluster 171	Enrichment Score: 0.30412396152766585
Category	Term	Count	%	PValue	Genes	List Total	Pop Hits	Pop Total	Fold Enrichment	Bonferroni	Benjamini	FDR
SP_PIR_KEYWORDS	Apoptosis	35	2.89975	0.022704	ILMN_1783753, ILMN_1723900, ILMN_1699636, ILMN_1657937, ILMN_1770537, ILMN_1810628, ILMN_1654376, ILMN_1676159, ILMN_1674874, ILMN_1781381, ILMN_1736015, ILMN_1789830, ILMN_1681703, ILMN_1815051, ILMN_1673207, ILMN_1786893, ILMN_1789793, ILMN_1678962, ILMN_1808634, ILMN_1756787, ILMN_1736562, ILMN_1801605, ILMN_1668910, ILMN_1812934, ILMN_1802157, ILMN_1680132, ILMN_1689665, ILMN_1714965, ILMN_17…	1200	381	19235	1.4725	0.999979	0.204417	27.9377
GOTERM_BP_FAT	GO:0006915~apoptosis	37	3.06545	0.739526	ILMN_1783753, ILMN_1723900, ILMN_1699636, ILMN_1657937, ILMN_1770537, ILMN_1810628, ILMN_1813489, ILMN_1654376, ILMN_1728514, ILMN_1676159, ILMN_1674874, ILMN_1781381, ILMN_1736015, ILMN_1789830, ILMN_1681703, ILMN_1815051, ILMN_1673207, ILMN_1786893, ILMN_1789793, ILMN_1678962, ILMN_1756787, ILMN_1801605, ILMN_1668910, ILMN_1812934, ILMN_1802157, ILMN_1680132, ILMN_1689665, ILMN_1690546, ILMN_17…	886	602	13528	0.938437	1	0.999871	100
GOTERM_BP_FAT	GO:0008219~cell death	44	3.6454	0.755851	ILMN_1783753, ILMN_1723900, ILMN_1699636, ILMN_1657937, ILMN_1770537, ILMN_1810628, ILMN_1813489, ILMN_1654376, ILMN_1728514, ILMN_1676159, ILMN_1674874, ILMN_1781381, ILMN_1736015, ILMN_1681703, ILMN_1789830, ILMN_1815051, ILMN_1673207, ILMN_1738681, ILMN_1750256, ILMN_1786893, ILMN_1789793, ILMN_1678962, ILMN_1677532, ILMN_1767894, ILMN_1756787, ILMN_1798061, ILMN_1801605, ILMN_1697117, ILMN_16…	886	719	13528	0.93438	1	0.999899	100
GOTERM_BP_FAT	GO:0012501~programmed cell death	37	3.06545	0.770052	ILMN_1783753, ILMN_1723900, ILMN_1699636, ILMN_1657937, ILMN_1770537, ILMN_1810628, ILMN_1813489, ILMN_1654376, ILMN_1728514, ILMN_1676159, ILMN_1674874, ILMN_1781381, ILMN_1736015, ILMN_1789830, ILMN_1681703, ILMN_1815051, ILMN_1673207, ILMN_1786893, ILMN_1789793, ILMN_1678962, ILMN_1756787, ILMN_1801605, ILMN_1668910, ILMN_1812934, ILMN_1802157, ILMN_1680132, ILMN_1689665, ILMN_1690546, ILMN_17…	886	611	13528	0.924614	1	0.999918	100
GOTERM_BP_FAT	GO:0042981~regulation of apoptosis	49	4.05965	0.770795	ILMN_1783753, ILMN_1777783, ILMN_1723900, ILMN_1737314, ILMN_1796912, ILMN_1740216, ILMN_1786601, ILMN_1676159, ILMN_1726387, ILMN_1669425, ILMN_1707308, ILMN_1789830, ILMN_1775192, ILMN_1738681, ILMN_1789793, ILMN_1767894, ILMN_1756787, ILMN_1813846, ILMN_1690546, ILMN_1714965, ILMN_1788363, ILMN_1701134, ILMN_1738523, ILMN_1695792, ILMN_1657937, ILMN_1810628, ILMN_1770537, ILMN_1654376, ILMN_17…	886	804	13528	0.93055	1	0.999916	100
GOTERM_BP_FAT	GO:0016265~death	44	3.6454	0.771189	ILMN_1783753, ILMN_1723900, ILMN_1699636, ILMN_1657937, ILMN_1770537, ILMN_1810628, ILMN_1813489, ILMN_1654376, ILMN_1728514, ILMN_1676159, ILMN_1674874, ILMN_1781381, ILMN_1736015, ILMN_1681703, ILMN_1789830, ILMN_1815051, ILMN_1673207, ILMN_1738681, ILMN_1750256, ILMN_1786893, ILMN_1789793, ILMN_1678962, ILMN_1677532, ILMN_1767894, ILMN_1756787, ILMN_1798061, ILMN_1801605, ILMN_1697117, ILMN_16…	886	724	13528	0.927927	1	0.999914	100
GOTERM_BP_FAT	GO:0043067~regulation of programmed cell death	49	4.05965	0.793012	ILMN_1783753, ILMN_1777783, ILMN_1723900, ILMN_1737314, ILMN_1796912, ILMN_1740216, ILMN_1786601, ILMN_1676159, ILMN_1726387, ILMN_1669425, ILMN_1707308, ILMN_1789830, ILMN_1775192, ILMN_1738681, ILMN_1789793, ILMN_1767894, ILMN_1756787, ILMN_1813846, ILMN_1690546, ILMN_1714965, ILMN_1788363, ILMN_1701134, ILMN_1738523, ILMN_1695792, ILMN_1657937, ILMN_1810628, ILMN_1770537, ILMN_1654376, ILMN_17…	886	812	13528	0.921382	1	0.99994	100
GOTERM_BP_FAT	GO:0010941~regulation of cell death	49	4.05965	0.80097	ILMN_1783753, ILMN_1777783, ILMN_1723900, ILMN_1737314, ILMN_1796912, ILMN_1740216, ILMN_1786601, ILMN_1676159, ILMN_1726387, ILMN_1669425, ILMN_1707308, ILMN_1789830, ILMN_1775192, ILMN_1738681, ILMN_1789793, ILMN_1767894, ILMN_1756787, ILMN_1813846, ILMN_1690546, ILMN_1714965, ILMN_1788363, ILMN_1701134, ILMN_1738523, ILMN_1695792, ILMN_1657937, ILMN_1810628, ILMN_1770537, ILMN_1654376, ILMN_17…	886	815	13528	0.917991	1	0.999948	100
Annotation Cluster 172	Enrichment Score: 0.3017625246109222
Category	Term	Count	%	PValue	Genes	List Total	Pop Hits	Pop Total	Fold Enrichment	Bonferroni	Benjamini	FDR
GOTERM_CC_FAT	GO:0031980~mitochondrial lumen	17	1.40845	0.196833	ILMN_1777756, ILMN_1652147, ILMN_1714384, ILMN_1721138, ILMN_1791182, ILMN_1799280, ILMN_1705397, ILMN_1758214, ILMN_1657868, ILMN_1799319, ILMN_1801378, ILMN_1736856, ILMN_1760174, ILMN_1709771, ILMN_1661264, ILMN_1762085, ILMN_1718963	712	227	12782	1.34444	1	0.755427	95.6197
GOTERM_CC_FAT	GO:0005759~mitochondrial matrix	17	1.40845	0.196833	ILMN_1777756, ILMN_1652147, ILMN_1714384, ILMN_1721138, ILMN_1791182, ILMN_1799280, ILMN_1705397, ILMN_1758214, ILMN_1657868, ILMN_1799319, ILMN_1801378, ILMN_1736856, ILMN_1760174, ILMN_1709771, ILMN_1661264, ILMN_1762085, ILMN_1718963	712	227	12782	1.34444	1	0.755427	95.6197
GOTERM_CC_FAT	GO:0005739~mitochondrion	61	5.05385	0.546425	ILMN_1783753, ILMN_1782257, ILMN_1666364, ILMN_1697919, ILMN_1726679, ILMN_1772521, ILMN_1763491, ILMN_1714167, ILMN_1813489, ILMN_1760441, ILMN_1760174, ILMN_1709771, ILMN_1661264, ILMN_1657893, ILMN_1701306, ILMN_1701855, ILMN_1732066, ILMN_1756787, ILMN_1722056, ILMN_1681118, ILMN_1758214, ILMN_1799319, ILMN_1809963, ILMN_1724211, ILMN_1769234, ILMN_1665066, ILMN_1680675, ILMN_1697629, ILMN_17…	712	1087	12782	1.00744	1	0.970734	99.9987
UP_SEQ_FEATURE	transit peptide:Mitochondrion	29	2.40265	0.6249	ILMN_1783753, ILMN_1714384, ILMN_1782257, ILMN_1666364, ILMN_1791182, ILMN_1799280, ILMN_1666280, ILMN_1772521, ILMN_1763491, ILMN_1760174, ILMN_1709771, ILMN_1661264, ILMN_1657893, ILMN_1701306, ILMN_1732066, ILMN_1657144, ILMN_1762990, ILMN_1671568, ILMN_1652147, ILMN_1721138, ILMN_1705397, ILMN_1758214, ILMN_1657868, ILMN_1809963, ILMN_1799319, ILMN_1801378, ILMN_1680675, ILMN_1736856, ILMN_16…	1199	467	19113	0.989899	1	1	100
SP_PIR_KEYWORDS	transit peptide	29	2.40265	0.65337	ILMN_1783753, ILMN_1714384, ILMN_1782257, ILMN_1666364, ILMN_1791182, ILMN_1799280, ILMN_1666280, ILMN_1772521, ILMN_1763491, ILMN_1760174, ILMN_1709771, ILMN_1661264, ILMN_1657893, ILMN_1701306, ILMN_1732066, ILMN_1657144, ILMN_1762990, ILMN_1671568, ILMN_1652147, ILMN_1721138, ILMN_1705397, ILMN_1758214, ILMN_1657868, ILMN_1809963, ILMN_1799319, ILMN_1801378, ILMN_1680675, ILMN_1736856, ILMN_16…	1200	476	19235	0.976567	1	0.98395	100
GOTERM_CC_FAT	GO:0044429~mitochondrial part	27	2.23695	0.921999	ILMN_1783753, ILMN_1714384, ILMN_1791182, ILMN_1799280, ILMN_1666280, ILMN_1763491, ILMN_1714167, ILMN_1813489, ILMN_1760174, ILMN_1709771, ILMN_1661264, ILMN_1701855, ILMN_1732066, ILMN_1762085, ILMN_1777756, ILMN_1652147, ILMN_1781155, ILMN_1721138, ILMN_1696087, ILMN_1705397, ILMN_1758214, ILMN_1657868, ILMN_1799319, ILMN_1801378, ILMN_1665066, ILMN_1736856, ILMN_1769031, ILMN_1718963	712	595	12782	0.81464	1	0.999193	100
SP_PIR_KEYWORDS	mitochondrion	41	3.39685	0.968801	ILMN_1783753, ILMN_1714384, ILMN_1782257, ILMN_1666364, ILMN_1791182, ILMN_1799280, ILMN_1666280, ILMN_1772521, ILMN_1763491, ILMN_1719627, ILMN_1760441, ILMN_1760174, ILMN_1709771, ILMN_1661264, ILMN_1657893, ILMN_1701306, ILMN_1732066, ILMN_1657144, ILMN_1762990, ILMN_1777756, ILMN_1756338, ILMN_1652147, ILMN_1671568, ILMN_1722056, ILMN_1721138, ILMN_1681118, ILMN_1696087, ILMN_1736562, ILMN_17…	1200	832	19235	0.789899	1	0.99989	100
Annotation Cluster 173	Enrichment Score: 0.2989921831998143
Category	Term	Count	%	PValue	Genes	List Total	Pop Hits	Pop Total	Fold Enrichment	Bonferroni	Benjamini	FDR
GOTERM_BP_FAT	GO:0035137~hindlimb morphogenesis	4	0.3314	0.240087	ILMN_1814173, ILMN_1721729, ILMN_1778930, ILMN_1800331	886	26	13528	2.34902	1	0.972486	99.2461
GOTERM_BP_FAT	GO:0035116~embryonic hindlimb morphogenesis	3	0.24855	0.331371	ILMN_1814173, ILMN_1721729, ILMN_1778930	886	18	13528	2.54477	1	0.989762	99.9227
GOTERM_BP_FAT	GO:0030326~embryonic limb morphogenesis	7	0.57995	0.507876	ILMN_1814173, ILMN_1721729, ILMN_1778930, ILMN_1800331, ILMN_1762531, ILMN_1716480, ILMN_1710598	886	87	13528	1.22851	1	0.998197	99.9997
GOTERM_BP_FAT	GO:0035113~embryonic appendage morphogenesis	7	0.57995	0.507876	ILMN_1814173, ILMN_1721729, ILMN_1778930, ILMN_1800331, ILMN_1762531, ILMN_1716480, ILMN_1710598	886	87	13528	1.22851	1	0.998197	99.9997
GOTERM_BP_FAT	GO:0048598~embryonic morphogenesis	21	1.73985	0.541514	ILMN_1747419, ILMN_1696339, ILMN_1814173, ILMN_1761259, ILMN_1707175, ILMN_1797367, ILMN_1778930, ILMN_1652163, ILMN_1773567, ILMN_1765574, ILMN_1716480, ILMN_1710598, ILMN_1676010, ILMN_1715647, ILMN_1669425, ILMN_1659463, ILMN_1669555, ILMN_1741477, ILMN_1721729, ILMN_1802376, ILMN_1800331, ILMN_1762531	886	307	13528	1.04443	1	0.99867	99.9999
GOTERM_BP_FAT	GO:0035107~appendage morphogenesis	7	0.57995	0.635655	ILMN_1814173, ILMN_1721729, ILMN_1778930, ILMN_1800331, ILMN_1762531, ILMN_1716480, ILMN_1710598	886	99	13528	1.0796	1	0.999539	100
GOTERM_BP_FAT	GO:0035108~limb morphogenesis	7	0.57995	0.635655	ILMN_1814173, ILMN_1721729, ILMN_1778930, ILMN_1800331, ILMN_1762531, ILMN_1716480, ILMN_1710598	886	99	13528	1.0796	1	0.999539	100
GOTERM_BP_FAT	GO:0048736~appendage development	7	0.57995	0.673611	ILMN_1814173, ILMN_1721729, ILMN_1778930, ILMN_1800331, ILMN_1762531, ILMN_1716480, ILMN_1710598	886	103	13528	1.03767	1	0.999666	100
GOTERM_BP_FAT	GO:0060173~limb development	7	0.57995	0.673611	ILMN_1814173, ILMN_1721729, ILMN_1778930, ILMN_1800331, ILMN_1762531, ILMN_1716480, ILMN_1710598	886	103	13528	1.03767	1	0.999666	100
Annotation Cluster 174	Enrichment Score: 0.2975351288459961
Category	Term	Count	%	PValue	Genes	List Total	Pop Hits	Pop Total	Fold Enrichment	Bonferroni	Benjamini	FDR
KEGG_PATHWAY	hsa04920:Adipocytokine signaling pathway	7	0.57995	0.2118	ILMN_1714965, ILMN_1751871, ILMN_1707308, ILMN_1717313, ILMN_1786021, ILMN_1727142, ILMN_1769031	306	67	5085	1.73617	1	0.80705	94.3345
GOTERM_BP_FAT	GO:0019216~regulation of lipid metabolic process	9	0.74565	0.451669	ILMN_1777783, ILMN_1714965, ILMN_1751871, ILMN_1745470, ILMN_1712560, ILMN_1786021, ILMN_1762085, ILMN_1769031, ILMN_1756999	886	112	13528	1.22694	1	0.996951	99.9977
GOTERM_BP_FAT	GO:0046320~regulation of fatty acid oxidation	3	0.24855	0.555045	ILMN_1751871, ILMN_1786021, ILMN_1769031	886	28	13528	1.63592	1	0.998877	99.9999
GOTERM_BP_FAT	GO:0010565~regulation of cellular ketone metabolic process	4	0.3314	0.729769	ILMN_1751871, ILMN_1786021, ILMN_1762085, ILMN_1769031	886	57	13528	1.07148	1	0.999842	100
GOTERM_BP_FAT	GO:0019217~regulation of fatty acid metabolic process	3	0.24855	0.839587	ILMN_1751871, ILMN_1786021, ILMN_1769031	886	49	13528	0.934814	1	0.999972	100
Annotation Cluster 175	Enrichment Score: 0.29342229196834374
Category	Term	Count	%	PValue	Genes	List Total	Pop Hits	Pop Total	Fold Enrichment	Bonferroni	Benjamini	FDR
INTERPRO	IPR017936:Thioredoxin-like	4	0.3314	0.415918	ILMN_1783753, ILMN_1789384, ILMN_1772156, ILMN_1771862	1081	36	16659	1.7123	1	0.99943	99.986
INTERPRO	IPR013766:Thioredoxin domain	3	0.24855	0.530071	ILMN_1789384, ILMN_1772156, ILMN_1771862	1081	27	16659	1.7123	1	0.999923	99.9996
GOTERM_BP_FAT	GO:0045454~cell redox homeostasis	5	0.41425	0.597574	ILMN_1783753, ILMN_1789384, ILMN_1772156, ILMN_1771862, ILMN_1657893	886	63	13528	1.2118	1	0.999276	100
Annotation Cluster 176	Enrichment Score: 0.2916297995599047
Category	Term	Count	%	PValue	Genes	List Total	Pop Hits	Pop Total	Fold Enrichment	Bonferroni	Benjamini	FDR
KEGG_PATHWAY	hsa04662:B cell receptor signaling pathway	8	0.6628	0.161207	ILMN_1690546, ILMN_1714965, ILMN_1781155, ILMN_1685810, ILMN_1707308, ILMN_1800976, ILMN_1717313, ILMN_1813489, ILMN_1727142	306	75	5085	1.77255	1	0.806826	88.0015
KEGG_PATHWAY	hsa04370:VEGF signaling pathway	4	0.3314	0.836903	ILMN_1697629, ILMN_1690546, ILMN_1685810, ILMN_1800976, ILMN_1813489	306	75	5085	0.886275	1	0.988949	100
KEGG_PATHWAY	hsa04650:Natural killer cell mediated cytotoxicity	4	0.3314	0.98867	ILMN_1690546, ILMN_1685810, ILMN_1756787, ILMN_1800976, ILMN_1813489	306	133	5085	0.499779	1	0.999831	100
Annotation Cluster 177	Enrichment Score: 0.2866574990436359
Category	Term	Count	%	PValue	Genes	List Total	Pop Hits	Pop Total	Fold Enrichment	Bonferroni	Benjamini	FDR
GOTERM_MF_FAT	GO:0005085~guanyl-nucleotide exchange factor activity	15	1.24275	0.141456	ILMN_1674135, ILMN_1688534, ILMN_1796912, ILMN_1671221, ILMN_1671921, ILMN_1753716, ILMN_1755016, ILMN_1667306, ILMN_1663532, ILMN_1727171, ILMN_1768052, ILMN_1725992, ILMN_1681544, ILMN_1727205, ILMN_1750256, ILMN_1732371	872	152	12983	1.46929	1	0.825477	90.5456
GOTERM_BP_FAT	GO:0035023~regulation of Rho protein signal transduction	9	0.74565	0.320804	ILMN_1755016, ILMN_1737314, ILMN_1797367, ILMN_1768052, ILMN_1727171, ILMN_1796912, ILMN_1727205, ILMN_1750256, ILMN_1769031, ILMN_1732371	886	99	13528	1.38806	1	0.988649	99.8979
SP_PIR_KEYWORDS	guanine-nucleotide releasing factor	10	0.8285	0.341526	ILMN_1674135, ILMN_1755016, ILMN_1663532, ILMN_1768052, ILMN_1796912, ILMN_1725992, ILMN_1681544, ILMN_1727205, ILMN_1671221, ILMN_1750256, ILMN_1732371	1200	121	19235	1.32472	1	0.886132	99.7423
INTERPRO	IPR001331:Guanine-nucleotide dissociation stimulator, CDC24, conserved site	5	0.41425	0.590168	ILMN_1755016, ILMN_1768052, ILMN_1796912, ILMN_1727205, ILMN_1750256, ILMN_1732371	1081	63	16659	1.22307	1	0.999971	100
UP_SEQ_FEATURE	domain:DH	5	0.41425	0.612104	ILMN_1755016, ILMN_1768052, ILMN_1796912, ILMN_1727205, ILMN_1750256, ILMN_1732371	1199	67	19113	1.18961	1	1	100
INTERPRO	IPR000219:Dbl homology (DH) domain	5	0.41425	0.662102	ILMN_1755016, ILMN_1768052, ILMN_1796912, ILMN_1727205, ILMN_1750256, ILMN_1732371	1081	69	16659	1.11672	1	0.999993	100
GOTERM_MF_FAT	GO:0005088~Ras guanyl-nucleotide exchange factor activity	6	0.4971	0.711871	ILMN_1755016, ILMN_1667306, ILMN_1768052, ILMN_1796912, ILMN_1727205, ILMN_1750256, ILMN_1732371	872	88	12983	1.01514	1	0.998981	100
GOTERM_MF_FAT	GO:0005089~Rho guanyl-nucleotide exchange factor activity	5	0.41425	0.740433	ILMN_1755016, ILMN_1768052, ILMN_1796912, ILMN_1727205, ILMN_1750256, ILMN_1732371	872	74	12983	1.006	1	0.999276	100
SMART	SM00325:RhoGEF	5	0.41425	0.784688	ILMN_1755016, ILMN_1768052, ILMN_1796912, ILMN_1727205, ILMN_1750256, ILMN_1732371	696	69	9079	0.945257	1	0.999103	100
GOTERM_MF_FAT	GO:0005083~small GTPase regulator activity	15	1.24275	0.886812	ILMN_1723475, ILMN_1799796, ILMN_1779347, ILMN_1796912, ILMN_1712066, ILMN_1755016, ILMN_1726387, ILMN_1667306, ILMN_1731287, ILMN_1768052, ILMN_1751779, ILMN_1744240, ILMN_1727205, ILMN_1750256, ILMN_1742869, ILMN_1732371	872	274	12983	0.815078	1	0.99997	100
Annotation Cluster 178	Enrichment Score: 0.28162734223856917
Category	Term	Count	%	PValue	Genes	List Total	Pop Hits	Pop Total	Fold Enrichment	Bonferroni	Benjamini	FDR
GOTERM_MF_FAT	GO:0004536~deoxyribonuclease activity	4	0.3314	0.401532	ILMN_1678962, ILMN_1708764, ILMN_1780937, ILMN_1732885	872	34	12983	1.75162	1	0.977204	99.9644
GOTERM_MF_FAT	GO:0004520~endodeoxyribonuclease activity	3	0.24855	0.439764	ILMN_1708764, ILMN_1780937, ILMN_1732885	872	22	12983	2.03029	1	0.983254	99.9872
GOTERM_MF_FAT	GO:0004519~endonuclease activity	6	0.4971	0.809428	ILMN_1768273, ILMN_1746393, ILMN_1714438, ILMN_1708764, ILMN_1780937, ILMN_1732885	872	100	12983	0.893326	1	0.999837	100
Annotation Cluster 179	Enrichment Score: 0.2805485919006774
Category	Term	Count	%	PValue	Genes	List Total	Pop Hits	Pop Total	Fold Enrichment	Bonferroni	Benjamini	FDR
GOTERM_BP_FAT	GO:0019218~regulation of steroid metabolic process	4	0.3314	0.421752	ILMN_1777783, ILMN_1714965, ILMN_1712560, ILMN_1762085	886	36	13528	1.69651	1	0.996378	99.9942
GOTERM_BP_FAT	GO:0019216~regulation of lipid metabolic process	9	0.74565	0.451669	ILMN_1777783, ILMN_1714965, ILMN_1751871, ILMN_1745470, ILMN_1712560, ILMN_1786021, ILMN_1762085, ILMN_1769031, ILMN_1756999	886	112	13528	1.22694	1	0.996951	99.9977
GOTERM_BP_FAT	GO:0050810~regulation of steroid biosynthetic process	3	0.24855	0.493484	ILMN_1714965, ILMN_1712560, ILMN_1762085	886	25	13528	1.83223	1	0.997894	99.9994
GOTERM_BP_FAT	GO:0046890~regulation of lipid biosynthetic process	3	0.24855	0.80289	ILMN_1714965, ILMN_1712560, ILMN_1762085	886	45	13528	1.01791	1	0.999949	100
Annotation Cluster 180	Enrichment Score: 0.2756602185521219
Category	Term	Count	%	PValue	Genes	List Total	Pop Hits	Pop Total	Fold Enrichment	Bonferroni	Benjamini	FDR
GOTERM_BP_FAT	GO:0033043~regulation of organelle organization	20	1.657	0.119157	ILMN_1761858, ILMN_1797367, ILMN_1730999, ILMN_1807807, ILMN_1799688, ILMN_1674265, ILMN_1725121, ILMN_1760201, ILMN_1716480, ILMN_1704369, ILMN_1712452, ILMN_1688638, ILMN_1797445, ILMN_1786396, ILMN_1727171, ILMN_1802620, ILMN_1663106, ILMN_1727205, ILMN_1769031, ILMN_1778557	886	217	13528	1.40725	1	0.884867	89.5509
GOTERM_BP_FAT	GO:0010639~negative regulation of organelle organization	8	0.6628	0.289015	ILMN_1761858, ILMN_1797445, ILMN_1730999, ILMN_1674265, ILMN_1663106, ILMN_1760201, ILMN_1716480, ILMN_1704369	886	82	13528	1.48962	1	0.98443	99.7694
GOTERM_BP_FAT	GO:0051129~negative regulation of cellular component organization	11	0.91135	0.452111	ILMN_1761858, ILMN_1797445, ILMN_1730999, ILMN_1815941, ILMN_1674265, ILMN_1702396, ILMN_1663106, ILMN_1760201, ILMN_1701134, ILMN_1716480, ILMN_1704369	886	142	13528	1.18278	1	0.996848	99.9978
GOTERM_BP_FAT	GO:0030835~negative regulation of actin filament depolymerization	3	0.24855	0.471794	ILMN_1674265, ILMN_1663106, ILMN_1704369	886	24	13528	1.90858	1	0.997479	99.9988
[truncated: 1,209 more rows]
