# Supplementary material for: The cerebellum ages slowly according to the epigenetic clock
Source: Aging (Albany NY). 2015 May 11;7(5):294–306. doi: 10.18632/aging.100742 (PMC4468311; doi:10.18632/aging.100742)
Supplement: Supplementary file 4 [file aging-07-0294-s004.xlsx]

## Sheet: TableDavidEASEunderQ05
Annotation Cluster 1	Enrichment Score: 12.924559314473143
Category	Term	Count	%	PValue	Genes	List Total	Pop Hits	Pop Total	Fold Enrichment	Bonferroni	Benjamini	FDR
UCSC_TFBS	SOX5	415	52.9337	5.60199e-14	ILMN_1673450, ILMN_1743933, ILMN_1788886, ILMN_1682929, ILMN_1679460, ILMN_1690223, ILMN_1803423, ILMN_1660549, ILMN_1721605, ILMN_1713139, ILMN_1771179, ILMN_1715927, ILMN_1741540, ILMN_1762167, ILMN_1758825, ILMN_1809613, ILMN_1721093, ILMN_1688500, ILMN_1785161, ILMN_1763695, ILMN_1695003, ILMN_1806667, ILMN_1738266, ILMN_1668022, ILMN_1653762, ILMN_1742544, ILMN_1740407, ILMN_1656300, ILMN_17…	779	7857	19536	1.32461	9.92373e-12	3.67595e-13	6.88671e-11
UCSC_TFBS	SOX9	387	49.3622	1.17219e-13	ILMN_1673450, ILMN_1743933, ILMN_1788886, ILMN_1682929, ILMN_1679460, ILMN_1690223, ILMN_1803423, ILMN_1757837, ILMN_1660549, ILMN_1662927, ILMN_1721605, ILMN_1771179, ILMN_1715927, ILMN_1741540, ILMN_1762167, ILMN_1758825, ILMN_1809613, ILMN_1721093, ILMN_1800332, ILMN_1785161, ILMN_1653894, ILMN_1695003, ILMN_1683148, ILMN_1806667, ILMN_1738266, ILMN_1668022, ILMN_1668035, ILMN_1742544, ILMN_17…	779	7213	19536	1.34553	2.07514e-11	7.15539e-13	1.44007e-10
UCSC_TFBS	SRY	369	47.0663	2.56438e-13	ILMN_1788886, ILMN_1743933, ILMN_1682929, ILMN_1679460, ILMN_1690223, ILMN_1803423, ILMN_1766169, ILMN_1660549, ILMN_1734276, ILMN_1721605, ILMN_1771179, ILMN_1741540, ILMN_1762167, ILMN_1809613, ILMN_1688500, ILMN_1785161, ILMN_1695003, ILMN_1683148, ILMN_1806667, ILMN_1668022, ILMN_1742544, ILMN_1668035, ILMN_1653464, ILMN_1752075, ILMN_1758067, ILMN_1716407, ILMN_1705849, ILMN_1699562, ILMN_17…	779	6819	19536	1.35708	4.53937e-11	1.41853e-12	3.15015e-10
Annotation Cluster 2	Enrichment Score: 6.759323736415163
Category	Term	Count	%	PValue	Genes	List Total	Pop Hits	Pop Total	Fold Enrichment	Bonferroni	Benjamini	FDR
GOTERM_BP_FAT	GO:0007268~synaptic transmission	39	4.97449	8.52293e-10	ILMN_1806533, ILMN_1720282, ILMN_1715496, ILMN_1658835, ILMN_1810550, ILMN_1668035, ILMN_1731062, ILMN_1770454, ILMN_1663640, ILMN_1793360, ILMN_1713139, ILMN_1812824, ILMN_1812254, ILMN_1707571, ILMN_1685608, ILMN_1740024, ILMN_1770905, ILMN_1693604, ILMN_1787552, ILMN_1757081, ILMN_1666904, ILMN_1747019, ILMN_1729212, ILMN_1754375, ILMN_1672660, ILMN_1664125, ILMN_1751689, ILMN_1651817, ILMN_17…	568	298	13528	3.11698	2.19721e-06	7.32404e-07	1.50879e-06
GOTERM_BP_FAT	GO:0019226~transmission of nerve impulse	42	5.35714	2.38496e-09	ILMN_1806533, ILMN_1720282, ILMN_1715496, ILMN_1658835, ILMN_1810550, ILMN_1668035, ILMN_1725772, ILMN_1676609, ILMN_1690223, ILMN_1731062, ILMN_1770454, ILMN_1663640, ILMN_1793360, ILMN_1713139, ILMN_1812824, ILMN_1812254, ILMN_1707571, ILMN_1685608, ILMN_1740024, ILMN_1770905, ILMN_1693604, ILMN_1787552, ILMN_1757081, ILMN_1666904, ILMN_1747019, ILMN_1729212, ILMN_1754375, ILMN_1672660, ILMN_16…	568	350	13528	2.85803	6.14841e-06	1.22969e-06	4.22202e-06
GOTERM_BP_FAT	GO:0007267~cell-cell signaling	54	6.88776	2.08714e-07	ILMN_1720282, ILMN_1715496, ILMN_1658835, ILMN_1731062, ILMN_1770454, ILMN_1663640, ILMN_1810782, ILMN_1793360, ILMN_1713139, ILMN_1812254, ILMN_1707571, ILMN_1770905, ILMN_1693604, ILMN_1787552, ILMN_1666904, ILMN_1747019, ILMN_1809695, ILMN_1673998, ILMN_1672660, ILMN_1651817, ILMN_1796901, ILMN_1710859, ILMN_1771800, ILMN_1718198, ILMN_1767145, ILMN_1806533, ILMN_1668035, ILMN_1810550, ILMN_17…	568	600	13528	2.14352	0.00053792	4.48377e-05	0.000369479
GOTERM_BP_FAT	GO:0050877~neurological system process	72	9.18367	0.00216313	ILMN_1720282, ILMN_1746027, ILMN_1715496, ILMN_1658835, ILMN_1725772, ILMN_1805098, ILMN_1772366, ILMN_1676609, ILMN_1740250, ILMN_1659086, ILMN_1690223, ILMN_1731062, ILMN_1770454, ILMN_1663640, ILMN_1793360, ILMN_1713139, ILMN_1652017, ILMN_1707571, ILMN_1812254, ILMN_1676449, ILMN_1807610, ILMN_1770905, ILMN_1693604, ILMN_1787552, ILMN_1749962, ILMN_1666904, ILMN_1747019, ILMN_1672660, ILMN_16…	568	1210	13528	1.4172	0.996237	0.0682267	3.76092
Annotation Cluster 3	Enrichment Score: 6.052205155320977
Category	Term	Count	%	PValue	Genes	List Total	Pop Hits	Pop Total	Fold Enrichment	Bonferroni	Benjamini	FDR
GOTERM_BP_FAT	GO:0030182~neuron differentiation	49	6.25	9.48331e-10	ILMN_1791726, ILMN_1665761, ILMN_1703006, ILMN_1725772, ILMN_1690223, ILMN_1659086, ILMN_1693014, ILMN_1756755, ILMN_1770454, ILMN_1676449, ILMN_1749962, ILMN_1712943, ILMN_1796901, ILMN_1769891, ILMN_1676422, ILMN_1771800, ILMN_1758400, ILMN_1684447, ILMN_1691413, ILMN_1733421, ILMN_1765641, ILMN_1779875, ILMN_1752750, ILMN_1730845, ILMN_1707798, ILMN_1750706, ILMN_1759598, ILMN_1724162, ILMN_16…	568	438	13528	2.66445	2.44479e-06	6.11199e-07	1.6788e-06
GOTERM_BP_FAT	GO:0048666~neuron development	40	5.10204	9.87701e-09	ILMN_1765641, ILMN_1665761, ILMN_1703006, ILMN_1779875, ILMN_1752750, ILMN_1730845, ILMN_1659086, ILMN_1690223, ILMN_1707798, ILMN_1750706, ILMN_1770454, ILMN_1756755, ILMN_1759598, ILMN_1724162, ILMN_1676449, ILMN_1757387, ILMN_1749962, ILMN_1722809, ILMN_1750373, ILMN_1754375, ILMN_1712943, ILMN_1651838, ILMN_1756959, ILMN_1769891, ILMN_1796901, ILMN_1800889, ILMN_1711208, ILMN_1676422, ILMN_16…	568	339	13528	2.81025	2.54626e-05	3.63755e-06	1.74849e-05
GOTERM_BP_FAT	GO:0048667~cell morphogenesis involved in neuron differentiation	29	3.69898	5.09188e-08	ILMN_1765641, ILMN_1665761, ILMN_1730845, ILMN_1659086, ILMN_1707798, ILMN_1750706, ILMN_1759598, ILMN_1724162, ILMN_1676449, ILMN_1757387, ILMN_1749962, ILMN_1722809, ILMN_1750373, ILMN_1754375, ILMN_1712943, ILMN_1769891, ILMN_1756959, ILMN_1796901, ILMN_1711208, ILMN_1670870, ILMN_1676422, ILMN_1662482, ILMN_1739366, ILMN_1771800, ILMN_1689251, ILMN_1699574, ILMN_1695606, ILMN_1788291, ILMN_18…	568	209	13528	3.30474	0.00013126	1.45853e-05	9.01399e-05
GOTERM_BP_FAT	GO:0007409~axonogenesis	27	3.44388	1.3697e-07	ILMN_1765641, ILMN_1665761, ILMN_1730845, ILMN_1659086, ILMN_1707798, ILMN_1750706, ILMN_1759598, ILMN_1724162, ILMN_1676449, ILMN_1757387, ILMN_1749962, ILMN_1722809, ILMN_1750373, ILMN_1754375, ILMN_1712943, ILMN_1769891, ILMN_1756959, ILMN_1796901, ILMN_1670870, ILMN_1676422, ILMN_1662482, ILMN_1739366, ILMN_1771800, ILMN_1689251, ILMN_1699574, ILMN_1695606, ILMN_1807016	568	193	13528	3.3319	0.000353047	3.21003e-05	0.000242474
GOTERM_BP_FAT	GO:0048812~neuron projection morphogenesis	28	3.57143	2.7764e-07	ILMN_1765641, ILMN_1665761, ILMN_1730845, ILMN_1659086, ILMN_1707798, ILMN_1750706, ILMN_1759598, ILMN_1724162, ILMN_1676449, ILMN_1757387, ILMN_1749962, ILMN_1722809, ILMN_1750373, ILMN_1754375, ILMN_1712943, ILMN_1769891, ILMN_1756959, ILMN_1796901, ILMN_1711208, ILMN_1670870, ILMN_1676422, ILMN_1662482, ILMN_1739366, ILMN_1771800, ILMN_1689251, ILMN_1699574, ILMN_1695606, ILMN_1807016	568	213	13528	3.13086	0.0007155	5.50566e-05	0.000491496
GOTERM_BP_FAT	GO:0031175~neuron projection development	31	3.95408	3.46043e-07	ILMN_1765641, ILMN_1665761, ILMN_1752750, ILMN_1730845, ILMN_1659086, ILMN_1707798, ILMN_1750706, ILMN_1756755, ILMN_1759598, ILMN_1724162, ILMN_1676449, ILMN_1757387, ILMN_1749962, ILMN_1722809, ILMN_1750373, ILMN_1754375, ILMN_1712943, ILMN_1769891, ILMN_1756959, ILMN_1796901, ILMN_1711208, ILMN_1670870, ILMN_1676422, ILMN_1662482, ILMN_1739366, ILMN_1771800, ILMN_1758400, ILMN_1689251, ILMN_16…	568	256	13528	2.88408	0.000891701	6.37193e-05	0.000612586
GOTERM_BP_FAT	GO:0030030~cell projection organization	38	4.84694	7.43123e-07	ILMN_1765641, ILMN_1665761, ILMN_1766925, ILMN_1752750, ILMN_1730845, ILMN_1659086, ILMN_1707798, ILMN_1750706, ILMN_1756755, ILMN_1736078, ILMN_1728650, ILMN_1759598, ILMN_1724162, ILMN_1676449, ILMN_1757387, ILMN_1749962, ILMN_1722809, ILMN_1750373, ILMN_1754375, ILMN_1712943, ILMN_1756959, ILMN_1769891, ILMN_1796901, ILMN_1711208, ILMN_1676422, ILMN_1772686, ILMN_1670870, ILMN_1662482, ILMN_17…	568	368	13528	2.45935	0.00191394	0.000100825	0.00131552
GOTERM_BP_FAT	GO:0000904~cell morphogenesis involved in differentiation	29	3.69898	1.30247e-06	ILMN_1765641, ILMN_1665761, ILMN_1730845, ILMN_1659086, ILMN_1707798, ILMN_1750706, ILMN_1759598, ILMN_1724162, ILMN_1676449, ILMN_1757387, ILMN_1749962, ILMN_1722809, ILMN_1750373, ILMN_1754375, ILMN_1712943, ILMN_1769891, ILMN_1756959, ILMN_1796901, ILMN_1711208, ILMN_1670870, ILMN_1676422, ILMN_1662482, ILMN_1739366, ILMN_1771800, ILMN_1689251, ILMN_1699574, ILMN_1695606, ILMN_1788291, ILMN_18…	568	244	13528	2.8307	0.00335214	0.00014598	0.0023057
GOTERM_BP_FAT	GO:0048858~cell projection morphogenesis	29	3.69898	1.41943e-06	ILMN_1765641, ILMN_1665761, ILMN_1730845, ILMN_1659086, ILMN_1707798, ILMN_1750706, ILMN_1759598, ILMN_1724162, ILMN_1676449, ILMN_1757387, ILMN_1749962, ILMN_1722809, ILMN_1750373, ILMN_1754375, ILMN_1712943, ILMN_1769891, ILMN_1756959, ILMN_1796901, ILMN_1711208, ILMN_1670870, ILMN_1676422, ILMN_1662482, ILMN_1739366, ILMN_1771800, ILMN_1689251, ILMN_1699574, ILMN_1695606, ILMN_1776967, ILMN_18…	568	245	13528	2.81914	0.00365261	0.000152459	0.00251274
GOTERM_BP_FAT	GO:0032990~cell part morphogenesis	29	3.69898	3.36996e-06	ILMN_1765641, ILMN_1665761, ILMN_1730845, ILMN_1659086, ILMN_1707798, ILMN_1750706, ILMN_1759598, ILMN_1724162, ILMN_1676449, ILMN_1757387, ILMN_1749962, ILMN_1722809, ILMN_1750373, ILMN_1754375, ILMN_1712943, ILMN_1769891, ILMN_1756959, ILMN_1796901, ILMN_1711208, ILMN_1670870, ILMN_1676422, ILMN_1662482, ILMN_1739366, ILMN_1771800, ILMN_1689251, ILMN_1699574, ILMN_1695606, ILMN_1776967, ILMN_18…	568	256	13528	2.69801	0.00865013	0.000334089	0.00596555
GOTERM_BP_FAT	GO:0000902~cell morphogenesis	35	4.46429	6.53e-06	ILMN_1765641, ILMN_1665761, ILMN_1795937, ILMN_1730845, ILMN_1659086, ILMN_1707798, ILMN_1750706, ILMN_1759598, ILMN_1724162, ILMN_1676449, ILMN_1681777, ILMN_1757387, ILMN_1749962, ILMN_1722809, ILMN_1750373, ILMN_1754375, ILMN_1712943, ILMN_1797604, ILMN_1769891, ILMN_1756959, ILMN_1796901, ILMN_1711208, ILMN_1670870, ILMN_1676422, ILMN_1662482, ILMN_1739366, ILMN_1771800, ILMN_1691237, ILMN_16…	568	356	13528	2.34155	0.0166935	0.000623302	0.0115592
GOTERM_BP_FAT	GO:0006928~cell motion	41	5.22959	2.11011e-05	ILMN_1765641, ILMN_1658835, ILMN_1792409, ILMN_1660775, ILMN_1725772, ILMN_1654072, ILMN_1766925, ILMN_1730845, ILMN_1750706, ILMN_1731062, ILMN_1736078, ILMN_1734742, ILMN_1728650, ILMN_1724162, ILMN_1715203, ILMN_1676449, ILMN_1721626, ILMN_1681777, ILMN_1722809, ILMN_1750373, ILMN_1754375, ILMN_1678143, ILMN_1712943, ILMN_1797604, ILMN_1756959, ILMN_1769891, ILMN_1796901, ILMN_1810962, ILMN_16…	568	475	13528	2.05577	0.052946	0.00155305	0.0373479
GOTERM_BP_FAT	GO:0032989~cellular component morphogenesis	36	4.59184	2.69913e-05	ILMN_1765641, ILMN_1665761, ILMN_1795937, ILMN_1730845, ILMN_1659086, ILMN_1707798, ILMN_1750706, ILMN_1664071, ILMN_1759598, ILMN_1724162, ILMN_1676449, ILMN_1681777, ILMN_1757387, ILMN_1749962, ILMN_1722809, ILMN_1750373, ILMN_1754375, ILMN_1712943, ILMN_1797604, ILMN_1769891, ILMN_1756959, ILMN_1796901, ILMN_1711208, ILMN_1670870, ILMN_1676422, ILMN_1662482, ILMN_1739366, ILMN_1771800, ILMN_16…	568	397	13528	2.15972	0.0672186	0.00187889	0.047771
GOTERM_BP_FAT	GO:0007411~axon guidance	13	1.65816	0.00171956	ILMN_1750373, ILMN_1765641, ILMN_1754375, ILMN_1756959, ILMN_1769891, ILMN_1670870, ILMN_1750706, ILMN_1739366, ILMN_1724162, ILMN_1676449, ILMN_1699574, ILMN_1695606, ILMN_1807016	568	107	13528	2.89364	0.988167	0.0559927	3.00076
Annotation Cluster 4	Enrichment Score: 5.503724392870652
Category	Term	Count	%	PValue	Genes	List Total	Pop Hits	Pop Total	Fold Enrichment	Bonferroni	Benjamini	FDR
GOTERM_BP_FAT	GO:0010975~regulation of neuron projection development	19	2.42347	3.70463e-10	ILMN_1765641, ILMN_1672660, ILMN_1809632, ILMN_1779875, ILMN_1725772, ILMN_1776708, ILMN_1769891, ILMN_1659086, ILMN_1707798, ILMN_1663037, ILMN_1756755, ILMN_1764043, ILMN_1734742, ILMN_1739235, ILMN_1677261, ILMN_1699574, ILMN_1676449, ILMN_1722809, ILMN_1769926	568	70	13528	6.46459	9.55053e-07	9.55053e-07	6.55818e-07
GOTERM_BP_FAT	GO:0031344~regulation of cell projection organization	21	2.67857	5.33006e-10	ILMN_1765641, ILMN_1672660, ILMN_1809632, ILMN_1779875, ILMN_1725772, ILMN_1776708, ILMN_1769891, ILMN_1659086, ILMN_1707798, ILMN_1663037, ILMN_1756755, ILMN_1764043, ILMN_1734742, ILMN_1810559, ILMN_1739235, ILMN_1677261, ILMN_1699574, ILMN_1676449, ILMN_1733421, ILMN_1722809, ILMN_1769926	568	89	13528	5.61972	1.37409e-06	6.87045e-07	9.43564e-07
GOTERM_BP_FAT	GO:0050770~regulation of axonogenesis	16	2.04082	7.76656e-09	ILMN_1765641, ILMN_1672660, ILMN_1809632, ILMN_1779875, ILMN_1725772, ILMN_1769891, ILMN_1776708, ILMN_1659086, ILMN_1663037, ILMN_1756755, ILMN_1764043, ILMN_1734742, ILMN_1739235, ILMN_1676449, ILMN_1699574, ILMN_1722809	568	57	13528	6.68545	2.0022e-05	3.33703e-06	1.37489e-05
GOTERM_BP_FAT	GO:0010769~regulation of cell morphogenesis involved in differentiation	18	2.29592	1.41314e-08	ILMN_1765641, ILMN_1809632, ILMN_1672660, ILMN_1779875, ILMN_1725772, ILMN_1776708, ILMN_1769891, ILMN_1659086, ILMN_1682738, ILMN_1663037, ILMN_1756755, ILMN_1764043, ILMN_1734742, ILMN_1739235, ILMN_1677261, ILMN_1699574, ILMN_1676449, ILMN_1722809	568	77	13528	5.56759	3.64301e-05	4.55384e-06	2.50164e-05
GOTERM_BP_FAT	GO:0022604~regulation of cell morphogenesis	22	2.80612	1.13409e-07	ILMN_1765641, ILMN_1672660, ILMN_1809632, ILMN_1779875, ILMN_1795937, ILMN_1725772, ILMN_1776708, ILMN_1769891, ILMN_1659086, ILMN_1682738, ILMN_1663037, ILMN_1772686, ILMN_1756755, ILMN_1764043, ILMN_1734742, ILMN_1810559, ILMN_1739235, ILMN_1677261, ILMN_1699574, ILMN_1676449, ILMN_1698445, ILMN_1722809	568	131	13528	3.99978	0.000292325	2.92364e-05	0.000200764
GOTERM_BP_FAT	GO:0050767~regulation of neurogenesis	24	3.06122	4.35359e-07	ILMN_1765641, ILMN_1672660, ILMN_1809632, ILMN_1779875, ILMN_1725772, ILMN_1685078, ILMN_1670054, ILMN_1776708, ILMN_1769891, ILMN_1659086, ILMN_1707798, ILMN_1663037, ILMN_1764043, ILMN_1756755, ILMN_1736096, ILMN_1734742, ILMN_1667081, ILMN_1739235, ILMN_1677261, ILMN_1699574, ILMN_1676449, ILMN_1672094, ILMN_1722809, ILMN_1769926	568	166	13528	3.44341	0.00112173	7.48209e-05	0.000770699
GOTERM_BP_FAT	GO:0060284~regulation of cell development	27	3.44388	4.56658e-07	ILMN_1765641, ILMN_1779875, ILMN_1725772, ILMN_1685078, ILMN_1670054, ILMN_1659086, ILMN_1707798, ILMN_1756755, ILMN_1764043, ILMN_1770454, ILMN_1736096, ILMN_1734742, ILMN_1739235, ILMN_1677261, ILMN_1676449, ILMN_1672094, ILMN_1722809, ILMN_1672660, ILMN_1809632, ILMN_1769891, ILMN_1776708, ILMN_1682738, ILMN_1663037, ILMN_1808587, ILMN_1667081, ILMN_1699574, ILMN_1769926	568	205	13528	3.13686	0.00117657	7.35763e-05	0.000808403
GOTERM_BP_FAT	GO:0051960~regulation of nervous system development	26	3.31633	4.60268e-07	ILMN_1765641, ILMN_1779875, ILMN_1725772, ILMN_1685078, ILMN_1670054, ILMN_1659086, ILMN_1707798, ILMN_1756755, ILMN_1764043, ILMN_1770454, ILMN_1736096, ILMN_1734742, ILMN_1739235, ILMN_1677261, ILMN_1676449, ILMN_1672094, ILMN_1722809, ILMN_1672660, ILMN_1809632, ILMN_1769891, ILMN_1776708, ILMN_1663037, ILMN_1667081, ILMN_1771800, ILMN_1699574, ILMN_1769926	568	192	13528	3.22521	0.00118587	6.97959e-05	0.000814795
GOTERM_BP_FAT	GO:0045664~regulation of neuron differentiation	21	2.67857	6.56605e-07	ILMN_1765641, ILMN_1672660, ILMN_1809632, ILMN_1779875, ILMN_1725772, ILMN_1670054, ILMN_1776708, ILMN_1769891, ILMN_1659086, ILMN_1707798, ILMN_1663037, ILMN_1756755, ILMN_1764043, ILMN_1734742, ILMN_1667081, ILMN_1739235, ILMN_1677261, ILMN_1699574, ILMN_1676449, ILMN_1722809, ILMN_1769926	568	133	13528	3.76056	0.0016913	9.40361e-05	0.00116236
GOTERM_BP_FAT	GO:0050771~negative regulation of axonogenesis	7	0.892857	0.000472611	ILMN_1765641, ILMN_1734742, ILMN_1672660, ILMN_1779875, ILMN_1739235, ILMN_1699574, ILMN_1756755	568	25	13528	6.66873	0.70438	0.0204437	0.833354
GOTERM_BP_FAT	GO:0050768~negative regulation of neurogenesis	9	1.14796	0.000495408	ILMN_1765641, ILMN_1734742, ILMN_1672660, ILMN_1779875, ILMN_1739235, ILMN_1699574, ILMN_1672094, ILMN_1756755, ILMN_1736096	568	45	13528	4.76338	0.721261	0.0210662	0.873385
GOTERM_BP_FAT	GO:0010721~negative regulation of cell development	9	1.14796	0.000776707	ILMN_1765641, ILMN_1734742, ILMN_1672660, ILMN_1779875, ILMN_1739235, ILMN_1699574, ILMN_1672094, ILMN_1756755, ILMN_1736096	568	48	13528	4.46567	0.865087	0.0308141	1.3661
GOTERM_BP_FAT	GO:0031345~negative regulation of cell projection organization	7	0.892857	0.000903399	ILMN_1765641, ILMN_1734742, ILMN_1672660, ILMN_1779875, ILMN_1739235, ILMN_1699574, ILMN_1756755	568	28	13528	5.95423	0.902706	0.0346874	1.58725
GOTERM_BP_FAT	GO:0051129~negative regulation of cellular component organization	13	1.65816	0.0162312	ILMN_1765641, ILMN_1672660, ILMN_1779875, ILMN_1772366, ILMN_1812392, ILMN_1735735, ILMN_1756755, ILMN_1671686, ILMN_1734742, ILMN_1810559, ILMN_1739235, ILMN_1699574, ILMN_1681777	568	142	13528	2.18042	1	0.288386	25.1506
GOTERM_BP_FAT	GO:0045596~negative regulation of cell differentiation	15	1.91327	0.0706137	ILMN_1765641, ILMN_1672660, ILMN_1779875, ILMN_1682738, ILMN_1756755, ILMN_1653751, ILMN_1736096, ILMN_1734742, ILMN_1808587, ILMN_1739235, ILMN_1699574, ILMN_1764709, ILMN_1672094, ILMN_1733519, ILMN_1724832	568	216	13528	1.65395	1	0.612752	72.648
Annotation Cluster 5	Enrichment Score: 5.290485249556948
Category	Term	Count	%	PValue	Genes	List Total	Pop Hits	Pop Total	Fold Enrichment	Bonferroni	Benjamini	FDR
PUBMED_ID	11256614	33	4.20918	1.60895e-06	ILMN_1702199, ILMN_1658835, ILMN_1779596, ILMN_1779875, ILMN_1745593, ILMN_1726415, ILMN_1700328, ILMN_1748323, ILMN_1721027, ILMN_1708991, ILMN_1752075, ILMN_1736670, ILMN_1791280, ILMN_1684690, ILMN_1790249, ILMN_1725241, ILMN_1667381, ILMN_1765876, ILMN_1797776, ILMN_1758626, ILMN_1775441, ILMN_1700274, ILMN_1692163, ILMN_1680453, ILMN_1801833, ILMN_1695432, ILMN_1665810, ILMN_1671295, ILMN_17…	783	442	27491	2.62132	0.0221256	0.00203194	0.00339139
PUBMED_ID	16381901	44	5.61224	4.90832e-06	ILMN_1812403, ILMN_1678353, ILMN_1702199, ILMN_1658835, ILMN_1743933, ILMN_1779875, ILMN_1810550, ILMN_1745593, ILMN_1726415, ILMN_1700328, ILMN_1770623, ILMN_1748323, ILMN_1721027, ILMN_1752075, ILMN_1736670, ILMN_1728650, ILMN_1716407, ILMN_1684690, ILMN_1790249, ILMN_1725241, ILMN_1733519, ILMN_1718046, ILMN_1797776, ILMN_1656560, ILMN_1788878, ILMN_1705313, ILMN_1665775, ILMN_1700274, ILMN_16…	783	721	27491	2.14263	0.065978	0.00523665	0.0103456
PUBMED_ID	11076863	47	5.9949	4.95312e-06	ILMN_1812403, ILMN_1678353, ILMN_1702199, ILMN_1658835, ILMN_1779875, ILMN_1743933, ILMN_1810550, ILMN_1745593, ILMN_1726415, ILMN_1700328, ILMN_1770623, ILMN_1748323, ILMN_1721027, ILMN_1752075, ILMN_1736670, ILMN_1728650, ILMN_1716407, ILMN_1684690, ILMN_1790249, ILMN_1668830, ILMN_1725241, ILMN_1733519, ILMN_1718046, ILMN_1797776, ILMN_1656560, ILMN_1788878, ILMN_1705313, ILMN_1733045, ILMN_16…	783	795	27491	2.07568	0.0665597	0.00490779	0.01044
PUBMED_ID	15489336	44	5.61224	5.26153e-06	ILMN_1812403, ILMN_1678353, ILMN_1702199, ILMN_1658835, ILMN_1743933, ILMN_1779875, ILMN_1810550, ILMN_1745593, ILMN_1726415, ILMN_1700328, ILMN_1770623, ILMN_1748323, ILMN_1721027, ILMN_1752075, ILMN_1736670, ILMN_1728650, ILMN_1716407, ILMN_1684690, ILMN_1790249, ILMN_1725241, ILMN_1733519, ILMN_1718046, ILMN_1797776, ILMN_1656560, ILMN_1788878, ILMN_1705313, ILMN_1665775, ILMN_1700274, ILMN_16…	783	723	27491	2.1367	0.0705545	0.00486593	0.01109
PUBMED_ID	11230166	44	5.61224	1.71438e-05	ILMN_1702199, ILMN_1779875, ILMN_1779596, ILMN_1743933, ILMN_1810550, ILMN_1700328, ILMN_1665095, ILMN_1721027, ILMN_1752075, ILMN_1736670, ILMN_1791280, ILMN_1765855, ILMN_1716407, ILMN_1725241, ILMN_1667381, ILMN_1765876, ILMN_1702835, ILMN_1718046, ILMN_1797776, ILMN_1783388, ILMN_1656560, ILMN_1775441, ILMN_1655941, ILMN_1788878, ILMN_1705313, ILMN_1783805, ILMN_1793517, ILMN_1665775, ILMN_17…	783	759	27491	2.03535	0.212116	0.0131573	0.0361306
Annotation Cluster 6	Enrichment Score: 4.989403896288732
Category	Term	Count	%	PValue	Genes	List Total	Pop Hits	Pop Total	Fold Enrichment	Bonferroni	Benjamini	FDR
SP_PIR_KEYWORDS	synapse	30	3.82653	1.01344e-08	ILMN_1737162, ILMN_1794863, ILMN_1799115, ILMN_1736982, ILMN_1808136, ILMN_1677746, ILMN_1810782, ILMN_1666445, ILMN_1713139, ILMN_1671486, ILMN_1677261, ILMN_1707571, ILMN_1767842, ILMN_1757081, ILMN_1710410, ILMN_1666904, ILMN_1705210, ILMN_1751689, ILMN_1752764, ILMN_1651817, ILMN_1808501, ILMN_1722726, ILMN_1700042, ILMN_1805807, ILMN_1758400, ILMN_1727479, ILMN_1699768, ILMN_1737611, ILMN_17…	778	213	19235	3.4822	4.73275e-06	2.36638e-06	1.44538e-05
GOTERM_CC_FAT	GO:0045202~synapse	41	5.22959	9.77951e-08	ILMN_1737162, ILMN_1794863, ILMN_1799115, ILMN_1736982, ILMN_1808136, ILMN_1677746, ILMN_1770454, ILMN_1810782, ILMN_1666445, ILMN_1713139, ILMN_1677261, ILMN_1671486, ILMN_1707571, ILMN_1693604, ILMN_1767842, ILMN_1757081, ILMN_1710410, ILMN_1666904, ILMN_1729212, ILMN_1705210, ILMN_1799878, ILMN_1754375, ILMN_1809632, ILMN_1795251, ILMN_1751689, ILMN_1752764, ILMN_1651817, ILMN_1808501, ILMN_17…	581	355	12782	2.54085	3.52056e-05	1.17353e-05	0.000134312
SP_PIR_KEYWORDS	cell junction	40	5.10204	3.48344e-07	ILMN_1737162, ILMN_1792409, ILMN_1794863, ILMN_1799115, ILMN_1736982, ILMN_1808136, ILMN_1712075, ILMN_1677746, ILMN_1810782, ILMN_1666445, ILMN_1713139, ILMN_1677261, ILMN_1671486, ILMN_1707571, ILMN_1681777, ILMN_1765876, ILMN_1757081, ILMN_1767842, ILMN_1710410, ILMN_1666904, ILMN_1705210, ILMN_1775441, ILMN_1730229, ILMN_1751689, ILMN_1752764, ILMN_1651817, ILMN_1808501, ILMN_1722726, ILMN_17…	778	399	19235	2.47856	0.000162663	3.25348e-05	0.000496811
GOTERM_CC_FAT	GO:0030054~cell junction	49	6.25	1.91717e-06	ILMN_1658835, ILMN_1798892, ILMN_1736982, ILMN_1712075, ILMN_1677746, ILMN_1727633, ILMN_1810782, ILMN_1668411, ILMN_1713139, ILMN_1707571, ILMN_1681777, ILMN_1765876, ILMN_1666904, ILMN_1705210, ILMN_1775441, ILMN_1730229, ILMN_1752764, ILMN_1651817, ILMN_1722726, ILMN_1776708, ILMN_1700042, ILMN_1796901, ILMN_1810962, ILMN_1805807, ILMN_1801833, ILMN_1654422, ILMN_1758400, ILMN_1699768, ILMN_17…	581	518	12782	2.08108	0.000689942	9.85923e-05	0.00263301
GOTERM_CC_FAT	GO:0044456~synapse part	30	3.82653	2.3482e-06	ILMN_1737162, ILMN_1794863, ILMN_1799115, ILMN_1808136, ILMN_1677746, ILMN_1666445, ILMN_1713139, ILMN_1671486, ILMN_1677261, ILMN_1707571, ILMN_1693604, ILMN_1767842, ILMN_1757081, ILMN_1710410, ILMN_1666904, ILMN_1729212, ILMN_1705210, ILMN_1799878, ILMN_1751689, ILMN_1651817, ILMN_1722726, ILMN_1805807, ILMN_1758400, ILMN_1740508, ILMN_1731237, ILMN_1727479, ILMN_1769195, ILMN_1657760, ILMN_17…	581	246	12782	2.68293	0.000844995	0.000105663	0.00322498
SP_PIR_KEYWORDS	postsynaptic cell membrane	13	1.65816	0.00162553	ILMN_1751689, ILMN_1794863, ILMN_1651817, ILMN_1722726, ILMN_1799115, ILMN_1677746, ILMN_1758400, ILMN_1713139, ILMN_1677261, ILMN_1671486, ILMN_1707571, ILMN_1710410, ILMN_1705210	778	110	19235	2.92189	0.532211	0.0277463	2.29352
GOTERM_CC_FAT	GO:0045211~postsynaptic membrane	15	1.91327	0.00326214	ILMN_1751689, ILMN_1794863, ILMN_1651817, ILMN_1722726, ILMN_1799115, ILMN_1677746, ILMN_1740508, ILMN_1758400, ILMN_1713139, ILMN_1677261, ILMN_1671486, ILMN_1731237, ILMN_1707571, ILMN_1710410, ILMN_1705210	581	135	12782	2.44444	0.691579	0.0571183	4.38836
GOTERM_CC_FAT	GO:0014069~postsynaptic density	9	1.14796	0.0147488	ILMN_1758400, ILMN_1751689, ILMN_1794863, ILMN_1713139, ILMN_1722726, ILMN_1677261, ILMN_1671486, ILMN_1799115, ILMN_1677746	581	71	12782	2.78873	0.995248	0.153935	18.4594
Annotation Cluster 7	Enrichment Score: 4.682377007506528
Category	Term	Count	%	PValue	Genes	List Total	Pop Hits	Pop Total	Fold Enrichment	Bonferroni	Benjamini	FDR
UP_SEQ_FEATURE	domain:LIM zinc-binding 1	13	1.65816	5.47456e-07	ILMN_1758825, ILMN_1741356, ILMN_1703558, ILMN_1776708, ILMN_1764231, ILMN_1694432, ILMN_1813295, ILMN_1715189, ILMN_1668411, ILMN_1690125, ILMN_1662917, ILMN_1683148, ILMN_1807016, ILMN_1703487	778	50	19113	6.38738	0.00110361	0.00110361	0.000942179
UP_SEQ_FEATURE	domain:LIM zinc-binding 2	13	1.65816	5.47456e-07	ILMN_1758825, ILMN_1741356, ILMN_1703558, ILMN_1776708, ILMN_1764231, ILMN_1694432, ILMN_1813295, ILMN_1715189, ILMN_1668411, ILMN_1690125, ILMN_1662917, ILMN_1683148, ILMN_1807016, ILMN_1703487	778	50	19113	6.38738	0.00110361	0.00110361	0.000942179
SP_PIR_KEYWORDS	LIM domain	13	1.65816	2.47966e-05	ILMN_1758825, ILMN_1741356, ILMN_1703558, ILMN_1776708, ILMN_1764231, ILMN_1694432, ILMN_1813295, ILMN_1715189, ILMN_1668411, ILMN_1690125, ILMN_1662917, ILMN_1683148, ILMN_1807016, ILMN_1703487	778	71	19235	4.52687	0.0115133	0.000890383	0.0353593
INTERPRO	IPR001781:Zinc finger, LIM-type	13	1.65816	4.07087e-05	ILMN_1758825, ILMN_1741356, ILMN_1703558, ILMN_1776708, ILMN_1764231, ILMN_1694432, ILMN_1813295, ILMN_1715189, ILMN_1668411, ILMN_1690125, ILMN_1662917, ILMN_1683148, ILMN_1807016, ILMN_1703487	689	73	16659	4.30576	0.0432475	0.00734134	0.0649749
SMART	SM00132:LIM	13	1.65816	8.99808e-05	ILMN_1758825, ILMN_1741356, ILMN_1703558, ILMN_1776708, ILMN_1764231, ILMN_1694432, ILMN_1813295, ILMN_1715189, ILMN_1668411, ILMN_1690125, ILMN_1662917, ILMN_1683148, ILMN_1807016, ILMN_1703487	410	73	9079	3.94343	0.0191608	0.0191608	0.114056
UP_SEQ_FEATURE	domain:LIM zinc-binding 3	6	0.765306	0.00295673	ILMN_1758825, ILMN_1741356, ILMN_1668411, ILMN_1690125, ILMN_1703558, ILMN_1683148	778	25	19113	5.89604	0.997452	0.24754	4.96845
Annotation Cluster 8	Enrichment Score: 4.670697572624466
Category	Term	Count	%	PValue	Genes	List Total	Pop Hits	Pop Total	Fold Enrichment	Bonferroni	Benjamini	FDR
GOTERM_MF_FAT	GO:0008092~cytoskeletal protein binding	48	6.12245	4.20098e-07	ILMN_1678353, ILMN_1768486, ILMN_1798892, ILMN_1660775, ILMN_1795937, ILMN_1772366, ILMN_1703558, ILMN_1745593, ILMN_1808707, ILMN_1730845, ILMN_1815033, ILMN_1736982, ILMN_1727248, ILMN_1712075, ILMN_1698307, ILMN_1752075, ILMN_1701700, ILMN_1671843, ILMN_1664071, ILMN_1779147, ILMN_1716407, ILMN_1671486, ILMN_1681777, ILMN_1774132, ILMN_1701837, ILMN_1722809, ILMN_1761322, ILMN_1669714, ILMN_17…	558	504	12983	2.21591	0.000338542	0.000338542	0.000645484
GOTERM_MF_FAT	GO:0003779~actin binding	34	4.33673	4.1352e-06	ILMN_1795937, ILMN_1660775, ILMN_1798892, ILMN_1772366, ILMN_1703558, ILMN_1808707, ILMN_1815033, ILMN_1736982, ILMN_1727248, ILMN_1698307, ILMN_1752075, ILMN_1701700, ILMN_1664071, ILMN_1779147, ILMN_1671486, ILMN_1681777, ILMN_1701837, ILMN_1761322, ILMN_1669714, ILMN_1758825, ILMN_1797604, ILMN_1711617, ILMN_1700042, ILMN_1785265, ILMN_1812392, ILMN_1671686, ILMN_1654422, ILMN_1691237, ILMN_18…	558	326	12983	2.42662	0.00332743	0.00111038	0.0063536
SP_PIR_KEYWORDS	actin-binding	20	2.55102	0.00559834	ILMN_1660775, ILMN_1798892, ILMN_1797604, ILMN_1808707, ILMN_1785265, ILMN_1736982, ILMN_1727248, ILMN_1698307, ILMN_1812392, ILMN_1671686, ILMN_1701700, ILMN_1752075, ILMN_1654422, ILMN_1805448, ILMN_1779147, ILMN_1681777, ILMN_1701837, ILMN_1761322, ILMN_1669714, ILMN_1769926	778	247	19235	2.00192	0.927326	0.0763736	7.69469
Annotation Cluster 9	Enrichment Score: 4.628946129912606
Category	Term	Count	%	PValue	Genes	List Total	Pop Hits	Pop Total	Fold Enrichment	Bonferroni	Benjamini	FDR
GOTERM_BP_FAT	GO:0008038~neuron recognition	9	1.14796	1.1372e-06	ILMN_1765641, ILMN_1699574, ILMN_1676449, ILMN_1695606, ILMN_1730845, ILMN_1690223, ILMN_1750706, ILMN_1749962, ILMN_1722809	568	21	13528	10.2072	0.00292741	0.000139595	0.00201313
GOTERM_BP_FAT	GO:0007413~axonal fasciculation	6	0.765306	2.68784e-05	ILMN_1765641, ILMN_1699574, ILMN_1730845, ILMN_1750706, ILMN_1749962, ILMN_1722809	568	10	13528	14.2901	0.0669472	0.00192297	0.0475713
GOTERM_BP_FAT	GO:0008037~cell recognition	10	1.27551	0.000424543	ILMN_1765641, ILMN_1678423, ILMN_1699574, ILMN_1676449, ILMN_1695606, ILMN_1730845, ILMN_1690223, ILMN_1750706, ILMN_1749962, ILMN_1722809	568	55	13528	4.33035	0.665361	0.0197069	0.748896
Annotation Cluster 10	Enrichment Score: 4.104738962352601
Category	Term	Count	%	PValue	Genes	List Total	Pop Hits	Pop Total	Fold Enrichment	Bonferroni	Benjamini	FDR
GOTERM_BP_FAT	GO:0030036~actin cytoskeleton organization	24	3.06122	7.71076e-05	ILMN_1754375, ILMN_1678143, ILMN_1795937, ILMN_1651838, ILMN_1792409, ILMN_1798892, ILMN_1797604, ILMN_1703558, ILMN_1808707, ILMN_1785265, ILMN_1776708, ILMN_1727248, ILMN_1692664, ILMN_1772686, ILMN_1812392, ILMN_1671686, ILMN_1664071, ILMN_1805448, ILMN_1810559, ILMN_1690125, ILMN_1744046, ILMN_1759513, ILMN_1761322, ILMN_1769926	568	226	13528	2.52923	0.180279	0.00495745	0.136413
GOTERM_BP_FAT	GO:0030029~actin filament-based process	25	3.18878	7.73035e-05	ILMN_1798892, ILMN_1795937, ILMN_1792409, ILMN_1703558, ILMN_1808707, ILMN_1727248, ILMN_1664071, ILMN_1810559, ILMN_1759513, ILMN_1761322, ILMN_1669714, ILMN_1678143, ILMN_1754375, ILMN_1651838, ILMN_1797604, ILMN_1785265, ILMN_1776708, ILMN_1692664, ILMN_1772686, ILMN_1812392, ILMN_1671686, ILMN_1805448, ILMN_1690125, ILMN_1744046, ILMN_1769926	568	241	13528	2.47063	0.180693	0.00484908	0.136759
GOTERM_BP_FAT	GO:0007010~cytoskeleton organization	37	4.71939	8.13742e-05	ILMN_1658835, ILMN_1779875, ILMN_1792409, ILMN_1795937, ILMN_1798892, ILMN_1703558, ILMN_1745593, ILMN_1808707, ILMN_1659086, ILMN_1727248, ILMN_1712075, ILMN_1764043, ILMN_1671843, ILMN_1664071, ILMN_1810559, ILMN_1759513, ILMN_1761322, ILMN_1758825, ILMN_1754375, ILMN_1678143, ILMN_1809632, ILMN_1651838, ILMN_1797604, ILMN_1776708, ILMN_1700042, ILMN_1785265, ILMN_1692664, ILMN_1772686, ILMN_18…	568	436	13528	2.02116	0.189247	0.00498258	0.143956
Annotation Cluster 11	Enrichment Score: 4.084925650381848
Category	Term	Count	%	PValue	Genes	List Total	Pop Hits	Pop Total	Fold Enrichment	Bonferroni	Benjamini	FDR
GOTERM_BP_FAT	GO:0051046~regulation of secretion	26	3.31633	1.20292e-06	ILMN_1715496, ILMN_1666924, ILMN_1668035, ILMN_1708275, ILMN_1740250, ILMN_1814719, ILMN_1666445, ILMN_1788184, ILMN_1682757, ILMN_1729212, ILMN_1799878, ILMN_1754375, ILMN_1651817, ILMN_1659197, ILMN_1673521, ILMN_1653161, ILMN_1710859, ILMN_1771800, ILMN_1718198, ILMN_1713756, ILMN_1691413, ILMN_1698554, ILMN_1712026, ILMN_1790270, ILMN_1733421, ILMN_1767145	568	202	13528	3.06554	0.00309633	0.000140951	0.00212947
GOTERM_BP_FAT	GO:0051047~positive regulation of secretion	17	2.16837	1.17568e-05	ILMN_1754375, ILMN_1668035, ILMN_1666924, ILMN_1651817, ILMN_1740250, ILMN_1814719, ILMN_1673521, ILMN_1710859, ILMN_1771800, ILMN_1713756, ILMN_1691413, ILMN_1698554, ILMN_1712026, ILMN_1790270, ILMN_1682757, ILMN_1767145, ILMN_1733421	568	109	13528	3.71456	0.0298545	0.000977239	0.0208106
GOTERM_BP_FAT	GO:0060341~regulation of cellular localization	25	3.18878	0.000120779	ILMN_1715496, ILMN_1666924, ILMN_1668035, ILMN_1708275, ILMN_1740250, ILMN_1814719, ILMN_1666445, ILMN_1788184, ILMN_1682757, ILMN_1729212, ILMN_1799878, ILMN_1754375, ILMN_1659197, ILMN_1673521, ILMN_1682738, ILMN_1653161, ILMN_1710859, ILMN_1771800, ILMN_1718198, ILMN_1713756, ILMN_1691413, ILMN_1698554, ILMN_1712026, ILMN_1733421, ILMN_1767145	568	248	13528	2.4009	0.267569	0.00705197	0.213595
GOTERM_BP_FAT	GO:0051050~positive regulation of transport	23	2.93367	0.000174086	ILMN_1754375, ILMN_1779875, ILMN_1668035, ILMN_1651817, ILMN_1666924, ILMN_1740250, ILMN_1814719, ILMN_1682738, ILMN_1673521, ILMN_1808136, ILMN_1710859, ILMN_1771800, ILMN_1771622, ILMN_1810559, ILMN_1713756, ILMN_1691413, ILMN_1698554, ILMN_1712026, ILMN_1682757, ILMN_1790270, ILMN_1767145, ILMN_1733421, ILMN_1785380	568	223	13528	2.45645	0.361627	0.00930708	0.30773
GOTERM_BP_FAT	GO:0046887~positive regulation of hormone secretion	8	1.02041	0.000633014	ILMN_1713756, ILMN_1691413, ILMN_1668035, ILMN_1698554, ILMN_1740250, ILMN_1682757, ILMN_1814719, ILMN_1673521	568	36	13528	5.29264	0.804545	0.0255787	1.1147
GOTERM_BP_FAT	GO:0046883~regulation of hormone secretion	10	1.27551	0.00164344	ILMN_1713756, ILMN_1691413, ILMN_1668035, ILMN_1698554, ILMN_1659197, ILMN_1740250, ILMN_1682757, ILMN_1814719, ILMN_1673521, ILMN_1799878	568	66	13528	3.60862	0.985596	0.0542651	2.86973
Annotation Cluster 12	Enrichment Score: 4.009279912289631
Category	Term	Count	%	PValue	Genes	List Total	Pop Hits	Pop Total	Fold Enrichment	Bonferroni	Benjamini	FDR
GOTERM_BP_FAT	GO:0044057~regulation of system process	34	4.33673	7.72994e-07	ILMN_1765641, ILMN_1715496, ILMN_1660775, ILMN_1668035, ILMN_1666924, ILMN_1757497, ILMN_1708275, ILMN_1740250, ILMN_1664071, ILMN_1666445, ILMN_1677261, ILMN_1710410, ILMN_1729212, ILMN_1669714, ILMN_1799878, ILMN_1733259, ILMN_1754375, ILMN_1808590, ILMN_1712943, ILMN_1651817, ILMN_1668236, ILMN_1673521, ILMN_1653161, ILMN_1689043, ILMN_1771800, ILMN_1718198, ILMN_1768534, ILMN_1740508, ILMN_16…	568	309	13528	2.62063	0.00199079	9.9634e-05	0.0013684
GOTERM_BP_FAT	GO:0051046~regulation of secretion	26	3.31633	1.20292e-06	ILMN_1715496, ILMN_1666924, ILMN_1668035, ILMN_1708275, ILMN_1740250, ILMN_1814719, ILMN_1666445, ILMN_1788184, ILMN_1682757, ILMN_1729212, ILMN_1799878, ILMN_1754375, ILMN_1651817, ILMN_1659197, ILMN_1673521, ILMN_1653161, ILMN_1710859, ILMN_1771800, ILMN_1718198, ILMN_1713756, ILMN_1691413, ILMN_1698554, ILMN_1712026, ILMN_1790270, ILMN_1733421, ILMN_1767145	568	202	13528	3.06554	0.00309633	0.000140951	0.00212947
GOTERM_BP_FAT	GO:0050804~regulation of synaptic transmission	17	2.16837	0.0001813	ILMN_1754375, ILMN_1715496, ILMN_1651817, ILMN_1666924, ILMN_1757497, ILMN_1740250, ILMN_1673521, ILMN_1653161, ILMN_1689043, ILMN_1718198, ILMN_1768534, ILMN_1666445, ILMN_1677261, ILMN_1790270, ILMN_1767145, ILMN_1729212, ILMN_1769926	568	136	13528	2.97711	0.373391	0.0094941	0.320464
GOTERM_BP_FAT	GO:0031644~regulation of neurological system process	18	2.29592	0.000231437	ILMN_1754375, ILMN_1715496, ILMN_1712943, ILMN_1651817, ILMN_1666924, ILMN_1757497, ILMN_1740250, ILMN_1673521, ILMN_1653161, ILMN_1689043, ILMN_1718198, ILMN_1768534, ILMN_1666445, ILMN_1677261, ILMN_1790270, ILMN_1767145, ILMN_1729212, ILMN_1769926	568	153	13528	2.80199	0.449381	0.0118633	0.408914
GOTERM_BP_FAT	GO:0051969~regulation of transmission of nerve impulse	17	2.16837	0.000442188	ILMN_1754375, ILMN_1715496, ILMN_1651817, ILMN_1666924, ILMN_1757497, ILMN_1740250, ILMN_1673521, ILMN_1653161, ILMN_1689043, ILMN_1718198, ILMN_1768534, ILMN_1666445, ILMN_1677261, ILMN_1790270, ILMN_1767145, ILMN_1729212, ILMN_1769926	568	147	13528	2.75434	0.680249	0.0201551	0.779907
GOTERM_BP_FAT	GO:0048167~regulation of synaptic plasticity	7	0.892857	0.0509883	ILMN_1754375, ILMN_1768534, ILMN_1666445, ILMN_1677261, ILMN_1757497, ILMN_1689043, ILMN_1769926	568	64	13528	2.60497	1	0.541534	60.4045
Annotation Cluster 13	Enrichment Score: 3.842365191385643
Category	Term	Count	%	PValue	Genes	List Total	Pop Hits	Pop Total	Fold Enrichment	Bonferroni	Benjamini	FDR
PUBMED_ID	16382104	11	1.40306	1.28204e-07	ILMN_1770383, ILMN_1704063, ILMN_1761903, ILMN_1692156, ILMN_1668236, ILMN_1671392, ILMN_1651900, ILMN_1790508, ILMN_1711092, ILMN_1657440, ILMN_1736303, ILMN_1775004	783	40	27491	9.6552	0.00178121	0.000254654	0.000270236
SP_PIR_KEYWORDS	potassium channel	16	2.04082	4.42605e-07	ILMN_1770383, ILMN_1704063, ILMN_1744403, ILMN_1692156, ILMN_1800179, ILMN_1668236, ILMN_1671392, ILMN_1711092, ILMN_1657440, ILMN_1721027, ILMN_1736303, ILMN_1740508, ILMN_1761903, ILMN_1765990, ILMN_1651900, ILMN_1790508, ILMN_1775004	778	78	19235	5.07152	0.000206675	3.44489e-05	0.000631247
INTERPRO	IPR003091:Voltage-dependent potassium channel	11	1.40306	5.28228e-07	ILMN_1770383, ILMN_1740508, ILMN_1761903, ILMN_1692156, ILMN_1668236, ILMN_1671392, ILMN_1651900, ILMN_1790508, ILMN_1711092, ILMN_1657440, ILMN_1736303, ILMN_1775004	689	33	16659	8.05951	0.000573491	0.000573491	0.000843356
SP_PIR_KEYWORDS	voltage-gated channel	21	2.67857	2.70677e-06	ILMN_1770383, ILMN_1704063, ILMN_1744403, ILMN_1692156, ILMN_1700328, ILMN_1800179, ILMN_1659733, ILMN_1668236, ILMN_1671392, ILMN_1763604, ILMN_1711092, ILMN_1768758, ILMN_1657440, ILMN_1721027, ILMN_1754076, ILMN_1736303, ILMN_1740508, ILMN_1761903, ILMN_1765990, ILMN_1779823, ILMN_1651900, ILMN_1790508, ILMN_1775004	778	150	19235	3.46131	0.00126326	0.000180564	0.00386036
SP_PIR_KEYWORDS	potassium	19	2.42347	3.13706e-06	ILMN_1770383, ILMN_1675391, ILMN_1704063, ILMN_1744403, ILMN_1692156, ILMN_1800179, ILMN_1668236, ILMN_1671392, ILMN_1797600, ILMN_1711092, ILMN_1657440, ILMN_1721027, ILMN_1736303, ILMN_1764043, ILMN_1740508, ILMN_1761903, ILMN_1765990, ILMN_1651900, ILMN_1790508, ILMN_1775004	778	126	19235	3.72817	0.00146394	0.00018311	0.00447402
GOTERM_BP_FAT	GO:0006813~potassium ion transport	22	2.80612	3.34681e-06	ILMN_1770383, ILMN_1675391, ILMN_1704063, ILMN_1779401, ILMN_1664125, ILMN_1744403, ILMN_1692156, ILMN_1800179, ILMN_1668236, ILMN_1740740, ILMN_1671392, ILMN_1797600, ILMN_1711092, ILMN_1657440, ILMN_1721027, ILMN_1736303, ILMN_1740508, ILMN_1761903, ILMN_1765990, ILMN_1651900, ILMN_1790508, ILMN_1793378, ILMN_1775004	568	160	13528	3.27482	0.00859098	0.000345064	0.00592458
SP_PIR_KEYWORDS	potassium transport	18	2.29592	3.6457e-06	ILMN_1770383, ILMN_1675391, ILMN_1704063, ILMN_1744403, ILMN_1692156, ILMN_1800179, ILMN_1668236, ILMN_1671392, ILMN_1797600, ILMN_1711092, ILMN_1657440, ILMN_1721027, ILMN_1736303, ILMN_1740508, ILMN_1761903, ILMN_1765990, ILMN_1651900, ILMN_1790508, ILMN_1775004	778	115	19235	3.86979	0.0017011	0.000189154	0.00519942
GOTERM_MF_FAT	GO:0022843~voltage-gated cation channel activity	21	2.67857	4.60748e-06	ILMN_1770383, ILMN_1704063, ILMN_1692156, ILMN_1700328, ILMN_1800179, ILMN_1659733, ILMN_1668236, ILMN_1740740, ILMN_1671392, ILMN_1711092, ILMN_1768758, ILMN_1763604, ILMN_1657440, ILMN_1754076, ILMN_1736303, ILMN_1740508, ILMN_1761903, ILMN_1765990, ILMN_1779823, ILMN_1651900, ILMN_1790508, ILMN_1793378, ILMN_1775004	558	147	12983	3.32386	0.00370675	0.000927979	0.00707921
GOTERM_CC_FAT	GO:0008076~voltage-gated potassium channel complex	16	2.04082	6.51236e-06	ILMN_1770383, ILMN_1664125, ILMN_1692156, ILMN_1800179, ILMN_1668236, ILMN_1671392, ILMN_1740740, ILMN_1711092, ILMN_1657440, ILMN_1736303, ILMN_1740508, ILMN_1761903, ILMN_1765990, ILMN_1651900, ILMN_1790508, ILMN_1775004, ILMN_1793378	581	86	12782	4.09302	0.00234171	0.000260461	0.00894375
GOTERM_CC_FAT	GO:0034705~potassium channel complex	16	2.04082	6.51236e-06	ILMN_1770383, ILMN_1664125, ILMN_1692156, ILMN_1800179, ILMN_1668236, ILMN_1671392, ILMN_1740740, ILMN_1711092, ILMN_1657440, ILMN_1736303, ILMN_1740508, ILMN_1761903, ILMN_1765990, ILMN_1651900, ILMN_1790508, ILMN_1775004, ILMN_1793378	581	86	12782	4.09302	0.00234171	0.000260461	0.00894375
GOTERM_MF_FAT	GO:0030955~potassium ion binding	19	2.42347	8.60804e-06	ILMN_1770383, ILMN_1675391, ILMN_1704063, ILMN_1744403, ILMN_1692156, ILMN_1800179, ILMN_1668236, ILMN_1671392, ILMN_1797600, ILMN_1711092, ILMN_1657440, ILMN_1721027, ILMN_1736303, ILMN_1764043, ILMN_1740508, ILMN_1761903, ILMN_1765990, ILMN_1651900, ILMN_1790508, ILMN_1775004	558	128	12983	3.4537	0.00691409	0.00138666	0.0132255
INTERPRO	IPR003968:Potassium channel, voltage dependent, Kv	9	1.14796	8.97382e-06	ILMN_1770383, ILMN_1761903, ILMN_1692156, ILMN_1668236, ILMN_1671392, ILMN_1651900, ILMN_1790508, ILMN_1711092, ILMN_1657440, ILMN_1736303	689	27	16659	8.05951	0.00969828	0.00324327	0.0143265
GOTERM_BP_FAT	GO:0030001~metal ion transport	41	5.22959	1.2875e-05	ILMN_1675391, ILMN_1770383, ILMN_1779401, ILMN_1692156, ILMN_1800179, ILMN_1700328, ILMN_1711092, ILMN_1763604, ILMN_1673637, ILMN_1657440, ILMN_1731062, ILMN_1721027, ILMN_1736303, ILMN_1666445, ILMN_1761903, ILMN_1804556, ILMN_1765990, ILMN_1767842, ILMN_1666904, ILMN_1809695, ILMN_1704063, ILMN_1664125, ILMN_1712023, ILMN_1744403, ILMN_1806908, ILMN_1659733, ILMN_1668236, ILMN_1671392, ILMN_17…	568	465	13528	2.09998	0.0326471	0.00103671	0.0227897
GOTERM_MF_FAT	GO:0005267~potassium channel activity	19	2.42347	1.47698e-05	ILMN_1770383, ILMN_1704063, ILMN_1664125, ILMN_1744403, ILMN_1692156, ILMN_1800179, ILMN_1668236, ILMN_1740740, ILMN_1671392, ILMN_1711092, ILMN_1657440, ILMN_1721027, ILMN_1736303, ILMN_1740508, ILMN_1761903, ILMN_1765990, ILMN_1651900, ILMN_1790508, ILMN_1793378, ILMN_1775004	558	133	12983	3.32386	0.011834	0.00198213	0.0226916
GOTERM_BP_FAT	GO:0006812~cation transport	46	5.86735	1.52802e-05	ILMN_1675391, ILMN_1779401, ILMN_1692156, ILMN_1800179, ILMN_1763604, ILMN_1731062, ILMN_1657440, ILMN_1721027, ILMN_1666904, ILMN_1809695, ILMN_1712023, ILMN_1789361, ILMN_1740740, ILMN_1797600, ILMN_1805807, ILMN_1754076, ILMN_1656129, ILMN_1758400, ILMN_1683146, ILMN_1810235, ILMN_1651900, ILMN_1790508, ILMN_1779823, ILMN_1716563, ILMN_1770383, ILMN_1803509, ILMN_1700328, ILMN_1673637, ILMN_17…	568	553	13528	1.98115	0.0386269	0.00119301	0.0270466
GOTERM_MF_FAT	GO:0005249~voltage-gated potassium channel activity	16	2.04082	2.20429e-05	ILMN_1770383, ILMN_1704063, ILMN_1692156, ILMN_1800179, ILMN_1668236, ILMN_1671392, ILMN_1740740, ILMN_1711092, ILMN_1657440, ILMN_1736303, ILMN_1740508, ILMN_1761903, ILMN_1765990, ILMN_1651900, ILMN_1790508, ILMN_1775004, ILMN_1793378	558	100	12983	3.72272	0.0176099	0.0025349	0.0338639
GOTERM_CC_FAT	GO:0034703~cation channel complex	19	2.42347	2.80606e-05	ILMN_1770383, ILMN_1664125, ILMN_1692156, ILMN_1800179, ILMN_1659733, ILMN_1668236, ILMN_1740740, ILMN_1671392, ILMN_1763604, ILMN_1711092, ILMN_1768758, ILMN_1657440, ILMN_1736303, ILMN_1740508, ILMN_1761903, ILMN_1765990, ILMN_1779823, ILMN_1651900, ILMN_1790508, ILMN_1793378, ILMN_1775004	581	132	12782	3.16667	0.0100511	0.000917938	0.0385317
GOTERM_MF_FAT	GO:0022832~voltage-gated channel activity	23	2.93367	3.27189e-05	ILMN_1770383, ILMN_1692156, ILMN_1800179, ILMN_1700328, ILMN_1711092, ILMN_1763604, ILMN_1657440, ILMN_1721027, ILMN_1736303, ILMN_1761903, ILMN_1765990, ILMN_1704063, ILMN_1744403, ILMN_1659733, ILMN_1668236, ILMN_1671392, ILMN_1740740, ILMN_1768758, ILMN_1754076, ILMN_1740508, ILMN_1790508, ILMN_1651900, ILMN_1779823, ILMN_1775004, ILMN_1793378	558	195	12983	2.74432	0.0260272	0.00329106	0.0502611
GOTERM_MF_FAT	GO:0005244~voltage-gated ion channel activity	23	2.93367	3.27189e-05	ILMN_1770383, ILMN_1692156, ILMN_1800179, ILMN_1700328, ILMN_1711092, ILMN_1763604, ILMN_1657440, ILMN_1721027, ILMN_1736303, ILMN_1761903, ILMN_1765990, ILMN_1704063, ILMN_1744403, ILMN_1659733, ILMN_1668236, ILMN_1671392, ILMN_1740740, ILMN_1768758, ILMN_1754076, ILMN_1740508, ILMN_1790508, ILMN_1651900, ILMN_1779823, ILMN_1775004, ILMN_1793378	558	195	12983	2.74432	0.0260272	0.00329106	0.0502611
SP_PIR_KEYWORDS	ionic channel	30	3.82653	4.00989e-05	ILMN_1770383, ILMN_1692156, ILMN_1800179, ILMN_1700328, ILMN_1767154, ILMN_1763604, ILMN_1711092, ILMN_1657440, ILMN_1721027, ILMN_1736303, ILMN_1761903, ILMN_1804556, ILMN_1765990, ILMN_1707571, ILMN_1704063, ILMN_1664125, ILMN_1651817, ILMN_1744403, ILMN_1659733, ILMN_1789361, ILMN_1668236, ILMN_1671392, ILMN_1768758, ILMN_1754076, ILMN_1758400, ILMN_1740508, ILMN_1786118, ILMN_1779823, ILMN_17…	778	318	19235	2.33242	0.0185523	0.00133672	0.0571743
INTERPRO	IPR003131:Potassium channel, voltage dependent, Kv, tetramerisation	11	1.40306	4.43942e-05	ILMN_1770383, ILMN_1761903, ILMN_1692156, ILMN_1668236, ILMN_1740740, ILMN_1671392, ILMN_1651900, ILMN_1790508, ILMN_1711092, ILMN_1657440, ILMN_1736303, ILMN_1793378	689	52	16659	5.11469	0.0470693	0.00686393	0.0708553
GOTERM_MF_FAT	GO:0005261~cation channel activity	28	3.57143	5.24498e-05	ILMN_1770383, ILMN_1692156, ILMN_1800179, ILMN_1700328, ILMN_1763604, ILMN_1711092, ILMN_1657440, ILMN_1721027, ILMN_1736303, ILMN_1761903, ILMN_1804556, ILMN_1765990, ILMN_1681777, ILMN_1704063, ILMN_1664125, ILMN_1744403, ILMN_1659733, ILMN_1789361, ILMN_1668236, ILMN_1740740, ILMN_1671392, ILMN_1768758, ILMN_1754076, ILMN_1740508, ILMN_1758400, ILMN_1779823, ILMN_1790508, ILMN_1651900, ILMN_17…	558	275	12983	2.36901	0.0413945	0.00421864	0.0805593
GOTERM_BP_FAT	GO:0015672~monovalent inorganic cation transport	30	3.82653	7.18411e-05	ILMN_1675391, ILMN_1770383, ILMN_1779401, ILMN_1803509, ILMN_1692156, ILMN_1800179, ILMN_1700328, ILMN_1711092, ILMN_1673637, ILMN_1657440, ILMN_1721027, ILMN_1736303, ILMN_1761903, ILMN_1765990, ILMN_1767842, ILMN_1666904, ILMN_1704063, ILMN_1664125, ILMN_1712023, ILMN_1744403, ILMN_1763387, ILMN_1668236, ILMN_1740740, ILMN_1671392, ILMN_1797600, ILMN_1740508, ILMN_1810235, ILMN_1790508, ILMN_16…	568	318	13528	2.24688	0.169073	0.00473779	0.127102
UP_SEQ_FEATURE	short sequence motif:Selectivity filter	11	1.40306	8.87723e-05	ILMN_1770383, ILMN_1704063, ILMN_1761903, ILMN_1800179, ILMN_1668236, ILMN_1671392, ILMN_1651900, ILMN_1790508, ILMN_1711092, ILMN_1736303, ILMN_1775004	778	57	19113	4.74097	0.163946	0.0579409	0.152669
UP_SEQ_FEATURE	region of interest:Segment H5 (pore-forming)	8	1.02041	0.000100037	ILMN_1770383, ILMN_1704063, ILMN_1664125, ILMN_1761903, ILMN_1668236, ILMN_1671392, ILMN_1711092, ILMN_1775004	778	28	19113	7.0191	0.182729	0.0491948	0.172026
GOTERM_BP_FAT	GO:0006811~ion transport	55	7.01531	0.000123205	ILMN_1675391, ILMN_1779401, ILMN_1658835, ILMN_1692156, ILMN_1800179, ILMN_1763604, ILMN_1731062, ILMN_1657440, ILMN_1721027, ILMN_1707571, ILMN_1666904, ILMN_1809695, ILMN_1712023, ILMN_1651817, ILMN_1789361, ILMN_1740740, ILMN_1797600, ILMN_1805807, ILMN_1652465, ILMN_1754076, ILMN_1656129, ILMN_1758400, ILMN_1683146, ILMN_1810235, ILMN_1779823, ILMN_1790508, ILMN_1651900, ILMN_1716563, ILMN_17…	568	768	13528	1.70564	0.272136	0.00688146	0.217881
GOTERM_MF_FAT	GO:0031420~alkali metal ion binding	24	3.06122	0.000124309	ILMN_1675391, ILMN_1770383, ILMN_1692156, ILMN_1800179, ILMN_1700328, ILMN_1711092, ILMN_1673637, ILMN_1657440, ILMN_1721027, ILMN_1764043, ILMN_1736303, ILMN_1761903, ILMN_1765990, ILMN_1767842, ILMN_1666904, ILMN_1704063, ILMN_1712023, ILMN_1744403, ILMN_1668236, ILMN_1671392, ILMN_1797600, ILMN_1740508, ILMN_1790508, ILMN_1651900, ILMN_1775004	558	228	12983	2.44916	0.0953429	0.00906767	0.190832
GOTERM_MF_FAT	GO:0046873~metal ion transmembrane transporter activity	30	3.82653	0.000181289	ILMN_1770383, ILMN_1692156, ILMN_1800179, ILMN_1700328, ILMN_1763604, ILMN_1711092, ILMN_1657440, ILMN_1721027, ILMN_1736303, ILMN_1761903, ILMN_1804556, ILMN_1765990, ILMN_1681777, ILMN_1704063, ILMN_1664125, ILMN_1744403, ILMN_1659733, ILMN_1789361, ILMN_1668236, ILMN_1740740, ILMN_1671392, ILMN_1768758, ILMN_1805807, ILMN_1754076, ILMN_1656129, ILMN_1758400, ILMN_1740508, ILMN_1779823, ILMN_17…	558	328	12983	2.12808	0.135957	0.0121038	0.27819
SP_PIR_KEYWORDS	ion transport	43	5.48469	0.00018549	ILMN_1675391, ILMN_1770383, ILMN_1803509, ILMN_1692156, ILMN_1800179, ILMN_1700328, ILMN_1767154, ILMN_1711092, ILMN_1763604, ILMN_1673637, ILMN_1657440, ILMN_1721027, ILMN_1736303, ILMN_1761903, ILMN_1804556, ILMN_1765990, ILMN_1707571, ILMN_1815581, ILMN_1767842, ILMN_1666904, ILMN_1739751, ILMN_1704063, ILMN_1664125, ILMN_1651817, ILMN_1712023, ILMN_1744403, ILMN_1659733, ILMN_1789361, ILMN_17…	778	578	19235	1.8393	0.0829854	0.00454919	0.264223
GOTERM_MF_FAT	GO:0022836~gated channel activity	28	3.57143	0.000383581	ILMN_1770383, ILMN_1692156, ILMN_1800179, ILMN_1700328, ILMN_1763604, ILMN_1711092, ILMN_1657440, ILMN_1721027, ILMN_1736303, ILMN_1761903, ILMN_1765990, ILMN_1707571, ILMN_1681777, ILMN_1704063, ILMN_1664125, ILMN_1651817, ILMN_1744403, ILMN_1659733, ILMN_1668236, ILMN_1740740, ILMN_1671392, ILMN_1768758, ILMN_1754076, ILMN_1758400, ILMN_1740508, ILMN_1779823, ILMN_1790508, ILMN_1651900, ILMN_17…	558	310	12983	2.10154	0.265985	0.020404	0.587754
GOTERM_MF_FAT	GO:0005216~ion channel activity	32	4.08163	0.000594542	ILMN_1770383, ILMN_1692156, ILMN_1800179, ILMN_1700328, ILMN_1767154, ILMN_1763604, ILMN_1711092, ILMN_1657440, ILMN_1721027, ILMN_1736303, ILMN_1761903, ILMN_1804556, ILMN_1765990, ILMN_1707571, ILMN_1681777, ILMN_1704063, ILMN_1664125, ILMN_1651817, ILMN_1744403, ILMN_1659733, ILMN_1789361, ILMN_1668236, ILMN_1740740, ILMN_1671392, ILMN_1768758, ILMN_1754076, ILMN_1758400, ILMN_1740508, ILMN_17…	558	386	12983	1.92887	0.38081	0.0262787	0.909629
INTERPRO	IPR005821:Ion transport	14	1.78571	0.000603365	ILMN_1770383, ILMN_1704063, ILMN_1692156, ILMN_1668236, ILMN_1671392, ILMN_1711092, ILMN_1657440, ILMN_1736303, ILMN_1740508, ILMN_1761903, ILMN_1804556, ILMN_1790508, ILMN_1651900, ILMN_1779823, ILMN_1775004	689	110	16659	3.07727	0.480793	0.0457389	0.958984
GOTERM_MF_FAT	GO:0015267~channel activity	33	4.20918	0.000858748	ILMN_1770383, ILMN_1692156, ILMN_1800179, ILMN_1700328, ILMN_1767154, ILMN_1763604, ILMN_1711092, ILMN_1657440, ILMN_1721027, ILMN_1736303, ILMN_1761903, ILMN_1804556, ILMN_1765990, ILMN_1707571, ILMN_1681777, ILMN_1704063, ILMN_1664125, ILMN_1651817, ILMN_1744403, ILMN_1659733, ILMN_1789361, ILMN_1668236, ILMN_1740740, ILMN_1671392, ILMN_1768758, ILMN_1754076, ILMN_1663575, ILMN_1758400, ILMN_17…	558	412	12983	1.86362	0.49965	0.0357885	1.31137
GOTERM_MF_FAT	GO:0022803~passive transmembrane transporter activity	33	4.20918	0.000897648	ILMN_1770383, ILMN_1692156, ILMN_1800179, ILMN_1700328, ILMN_1767154, ILMN_1763604, ILMN_1711092, ILMN_1657440, ILMN_1721027, ILMN_1736303, ILMN_1761903, ILMN_1804556, ILMN_1765990, ILMN_1707571, ILMN_1681777, ILMN_1704063, ILMN_1664125, ILMN_1651817, ILMN_1744403, ILMN_1659733, ILMN_1789361, ILMN_1668236, ILMN_1740740, ILMN_1671392, ILMN_1768758, ILMN_1754076, ILMN_1663575, ILMN_1758400, ILMN_17…	558	413	12983	1.85911	0.515108	0.0355444	1.37039
GOTERM_MF_FAT	GO:0022838~substrate specific channel activity	32	4.08163	0.00098493	ILMN_1770383, ILMN_1692156, ILMN_1800179, ILMN_1700328, ILMN_1767154, ILMN_1763604, ILMN_1711092, ILMN_1657440, ILMN_1721027, ILMN_1736303, ILMN_1761903, ILMN_1804556, ILMN_1765990, ILMN_1707571, ILMN_1681777, ILMN_1704063, ILMN_1664125, ILMN_1651817, ILMN_1744403, ILMN_1659733, ILMN_1789361, ILMN_1668236, ILMN_1740740, ILMN_1671392, ILMN_1768758, ILMN_1754076, ILMN_1758400, ILMN_1740508, ILMN_17…	558	398	12983	1.87072	0.548078	0.0371149	1.5027
GOTERM_CC_FAT	GO:0034702~ion channel complex	21	2.67857	0.00104764	ILMN_1770383, ILMN_1664125, ILMN_1692156, ILMN_1800179, ILMN_1659733, ILMN_1668236, ILMN_1740740, ILMN_1671392, ILMN_1767154, ILMN_1763604, ILMN_1711092, ILMN_1768758, ILMN_1657440, ILMN_1736303, ILMN_1740508, ILMN_1761903, ILMN_1765990, ILMN_1707571, ILMN_1779823, ILMN_1651900, ILMN_1790508, ILMN_1793378, ILMN_1775004	581	205	12782	2.25366	0.314322	0.0248427	1.42927
PUBMED_ID	10484328	3	0.382653	0.00237859	ILMN_1770383, ILMN_1761903, ILMN_1711092	783	3	27491	35.1098	1	0.622431	4.89581
GOTERM_MF_FAT	GO:0016247~channel regulator activity	8	1.02041	0.0127301	ILMN_1770383, ILMN_1779401, ILMN_1761903, ILMN_1806908, ILMN_1790508, ILMN_1716563, ILMN_1693604, ILMN_1731062, ILMN_1736303	558	59	12983	3.15485	0.999967	0.299583	17.869
GOTERM_MF_FAT	GO:0005251~delayed rectifier potassium channel activity	4	0.510204	0.0129296	ILMN_1770383, ILMN_1761903, ILMN_1668236, ILMN_1790508	558	12	12983	7.75568	0.999972	0.287062	18.1236
GOTERM_BP_FAT	GO:0055085~transmembrane transport	36	4.59184	0.0147651	ILMN_1675391, ILMN_1770383, ILMN_1803509, ILMN_1703006, ILMN_1778321, ILMN_1692156, ILMN_1735151, ILMN_1814719, ILMN_1711092, ILMN_1657440, ILMN_1736303, ILMN_1761903, ILMN_1804556, ILMN_1815581, ILMN_1767842, ILMN_1739751, ILMN_1666904, ILMN_1746116, ILMN_1704063, ILMN_1762093, ILMN_1712023, ILMN_1763387, ILMN_1668236, ILMN_1671392, ILMN_1797600, ILMN_1813374, ILMN_1805807, ILMN_1679949, ILMN_16…	568	569	13528	1.50687	1	0.267853	23.1512
GOTERM_MF_FAT	GO:0015459~potassium channel regulator activity	5	0.637755	0.0303035	ILMN_1770383, ILMN_1779401, ILMN_1761903, ILMN_1790508, ILMN_1736303	558	28	12983	4.15483	1	0.488462	37.6756
INTERPRO	IPR003971:Potassium channel, voltage dependent, Kv9	3	0.382653	0.0311508	ILMN_1770383, ILMN_1761903, ILMN_1671392	689	7	16659	10.3622	1	0.558811	39.665
INTERPRO	IPR000210:BTB/POZ-like	14	1.78571	0.0347739	ILMN_1770383, ILMN_1692156, ILMN_1668236, ILMN_1671392, ILMN_1740740, ILMN_1711092, ILMN_1657440, ILMN_1736303, ILMN_1701700, ILMN_1779147, ILMN_1761903, ILMN_1790508, ILMN_1651900, ILMN_1701837, ILMN_1793378	689	179	16659	1.89106	1	0.566377	43.1683
INTERPRO	IPR011333:BTB/POZ fold	14	1.78571	0.0375232	ILMN_1770383, ILMN_1692156, ILMN_1668236, ILMN_1671392, ILMN_1740740, ILMN_1711092, ILMN_1657440, ILMN_1736303, ILMN_1701700, ILMN_1779147, ILMN_1761903, ILMN_1790508, ILMN_1651900, ILMN_1701837, ILMN_1793378	689	181	16659	1.87016	1	0.586754	45.6985
SP_PIR_KEYWORDS	transport	83	10.5867	0.0376149	ILMN_1675391, ILMN_1703006, ILMN_1744628, ILMN_1778321, ILMN_1692156, ILMN_1800179, ILMN_1763604, ILMN_1657440, ILMN_1721027, ILMN_1712806, ILMN_1735798, ILMN_1662927, ILMN_1771179, ILMN_1707571, ILMN_1666904, ILMN_1651817, ILMN_1712023, ILMN_1800332, ILMN_1733045, ILMN_1713471, ILMN_1789361, ILMN_1797600, ILMN_1805807, ILMN_1652465, ILMN_1754076, ILMN_1658643, ILMN_1656129, ILMN_1766654, ILMN_18…	778	1670	19235	1.22878	1	0.296072	42.1211
PIR_SUPERFAMILY	PIRSF002449:potassium voltage-gated channel, alpha subunit, subfamilies A/C/D/F/G/S	4	0.510204	0.0522069	ILMN_1770383, ILMN_1692156, ILMN_1671392, ILMN_1790508, ILMN_1657440	319	20	7396	4.63699	1	0.999932	52.0878
SMART	SM00225:BTB	14	1.78571	0.0605421	ILMN_1770383, ILMN_1692156, ILMN_1668236, ILMN_1671392, ILMN_1740740, ILMN_1711092, ILMN_1657440, ILMN_1736303, ILMN_1701700, ILMN_1779147, ILMN_1761903, ILMN_1790508, ILMN_1651900, ILMN_1701837, ILMN_1793378	410	179	9079	1.73193	0.999999	0.488988	54.7079
Annotation Cluster 14	Enrichment Score: 3.828935813536912
Category	Term	Count	%	PValue	Genes	List Total	Pop Hits	Pop Total	Fold Enrichment	Bonferroni	Benjamini	FDR
GOTERM_CC_FAT	GO:0044459~plasma membrane part	150	19.1327	1.00792e-07	ILMN_1673450, ILMN_1791726, ILMN_1715496, ILMN_1677404, ILMN_1727360, ILMN_1766925, ILMN_1692156, ILMN_1682929, ILMN_1736982, ILMN_1688886, ILMN_1712075, ILMN_1677746, ILMN_1727633, ILMN_1712806, ILMN_1662927, ILMN_1713139, ILMN_1668411, ILMN_1729075, ILMN_1771179, ILMN_1802524, ILMN_1707571, ILMN_1685820, ILMN_1765876, ILMN_1693604, ILMN_1787552, ILMN_1698445, ILMN_1663263, ILMN_1705210, ILMN_17…	581	2203	12782	1.49796	3.62845e-05	9.07124e-06	0.000138428
GOTERM_CC_FAT	GO:0005887~integral to plasma membrane	74	9.43878	0.00437617	ILMN_1791726, ILMN_1720113, ILMN_1715496, ILMN_1658835, ILMN_1692156, ILMN_1686623, ILMN_1800179, ILMN_1688886, ILMN_1657440, ILMN_1774945, ILMN_1729075, ILMN_1802524, ILMN_1771179, ILMN_1707571, ILMN_1691648, ILMN_1693604, ILMN_1663263, ILMN_1787552, ILMN_1673998, ILMN_1651817, ILMN_1769891, ILMN_1810962, ILMN_1740740, ILMN_1805807, ILMN_1761280, ILMN_1728844, ILMN_1718198, ILMN_1758400, ILMN_17…	581	1188	12782	1.37037	0.793793	0.0692524	5.84562
GOTERM_CC_FAT	GO:0031226~intrinsic to plasma membrane	74	9.43878	0.00739048	ILMN_1791726, ILMN_1720113, ILMN_1715496, ILMN_1658835, ILMN_1692156, ILMN_1686623, ILMN_1800179, ILMN_1688886, ILMN_1657440, ILMN_1774945, ILMN_1729075, ILMN_1802524, ILMN_1771179, ILMN_1707571, ILMN_1691648, ILMN_1693604, ILMN_1663263, ILMN_1787552, ILMN_1673998, ILMN_1651817, ILMN_1769891, ILMN_1810962, ILMN_1740740, ILMN_1805807, ILMN_1761280, ILMN_1728844, ILMN_1718198, ILMN_1758400, ILMN_17…	581	1215	12782	1.33992	0.930779	0.0976111	9.68605
Annotation Cluster 15	Enrichment Score: 3.7060324894179746
Category	Term	Count	%	PValue	Genes	List Total	Pop Hits	Pop Total	Fold Enrichment	Bonferroni	Benjamini	FDR
GOTERM_BP_FAT	GO:0006928~cell motion	41	5.22959	2.11011e-05	ILMN_1765641, ILMN_1658835, ILMN_1792409, ILMN_1660775, ILMN_1725772, ILMN_1654072, ILMN_1766925, ILMN_1730845, ILMN_1750706, ILMN_1731062, ILMN_1736078, ILMN_1734742, ILMN_1728650, ILMN_1724162, ILMN_1715203, ILMN_1676449, ILMN_1721626, ILMN_1681777, ILMN_1722809, ILMN_1750373, ILMN_1754375, ILMN_1678143, ILMN_1712943, ILMN_1797604, ILMN_1756959, ILMN_1769891, ILMN_1796901, ILMN_1810962, ILMN_16…	568	475	13528	2.05577	0.052946	0.00155305	0.0373479
GOTERM_BP_FAT	GO:0016477~cell migration	26	3.31633	0.000248543	ILMN_1658835, ILMN_1792409, ILMN_1654072, ILMN_1725772, ILMN_1766925, ILMN_1730845, ILMN_1736078, ILMN_1728650, ILMN_1724162, ILMN_1676449, ILMN_1681777, ILMN_1721626, ILMN_1722809, ILMN_1754375, ILMN_1712943, ILMN_1797604, ILMN_1796901, ILMN_1810962, ILMN_1676422, ILMN_1738657, ILMN_1771800, ILMN_1749662, ILMN_1715189, ILMN_1699574, ILMN_1703178, ILMN_1724832	568	276	13528	2.24362	0.473142	0.0124866	0.439076
GOTERM_BP_FAT	GO:0048870~cell motility	27	3.44388	0.000534665	ILMN_1658835, ILMN_1792409, ILMN_1654072, ILMN_1725772, ILMN_1766925, ILMN_1730845, ILMN_1736078, ILMN_1728650, ILMN_1724162, ILMN_1715203, ILMN_1676449, ILMN_1681777, ILMN_1721626, ILMN_1722809, ILMN_1754375, ILMN_1712943, ILMN_1797604, ILMN_1796901, ILMN_1810962, ILMN_1676422, ILMN_1738657, ILMN_1771800, ILMN_1749662, ILMN_1715189, ILMN_1699574, ILMN_1703178, ILMN_1724832	568	307	13528	2.09465	0.748103	0.0219922	0.942286
GOTERM_BP_FAT	GO:0051674~localization of cell	27	3.44388	0.000534665	ILMN_1658835, ILMN_1792409, ILMN_1654072, ILMN_1725772, ILMN_1766925, ILMN_1730845, ILMN_1736078, ILMN_1728650, ILMN_1724162, ILMN_1715203, ILMN_1676449, ILMN_1681777, ILMN_1721626, ILMN_1722809, ILMN_1754375, ILMN_1712943, ILMN_1797604, ILMN_1796901, ILMN_1810962, ILMN_1676422, ILMN_1738657, ILMN_1771800, ILMN_1749662, ILMN_1715189, ILMN_1699574, ILMN_1703178, ILMN_1724832	568	307	13528	2.09465	0.748103	0.0219922	0.942286
Annotation Cluster 16	Enrichment Score: 3.491020852258718
Category	Term	Count	%	PValue	Genes	List Total	Pop Hits	Pop Total	Fold Enrichment	Bonferroni	Benjamini	FDR
SP_PIR_KEYWORDS	membrane	329	41.9643	4.94133e-09	ILMN_1812946, ILMN_1791726, ILMN_1673450, ILMN_1677404, ILMN_1727360, ILMN_1692156, ILMN_1682929, ILMN_1690223, ILMN_1722218, ILMN_1660549, ILMN_1677746, ILMN_1734276, ILMN_1659106, ILMN_1712806, ILMN_1662927, ILMN_1713829, ILMN_1713139, ILMN_1771179, ILMN_1707571, ILMN_1693604, ILMN_1698445, ILMN_1736518, ILMN_1663263, ILMN_1749962, ILMN_1705210, ILMN_1715013, ILMN_1809613, ILMN_1651817, ILMN_16…	778	6256	19235	1.3002	2.3076e-06	2.3076e-06	7.04738e-06
SP_PIR_KEYWORDS	signal	178	22.7041	1.00874e-05	ILMN_1658356, ILMN_1765620, ILMN_1766925, ILMN_1757020, ILMN_1676709, ILMN_1690223, ILMN_1688886, ILMN_1660549, ILMN_1727633, ILMN_1736096, ILMN_1769245, ILMN_1671260, ILMN_1713686, ILMN_1729075, ILMN_1802524, ILMN_1715927, ILMN_1663112, ILMN_1707571, ILMN_1703572, ILMN_1693604, ILMN_1663263, ILMN_1736518, ILMN_1749962, ILMN_1763834, ILMN_1656560, ILMN_1715013, ILMN_1712943, ILMN_1651817, ILMN_16…	778	3250	19235	1.3541	0.00469974	0.000428165	0.0143857
UP_SEQ_FEATURE	signal peptide	178	22.7041	1.5105e-05	ILMN_1658356, ILMN_1765620, ILMN_1766925, ILMN_1757020, ILMN_1676709, ILMN_1690223, ILMN_1688886, ILMN_1660549, ILMN_1727633, ILMN_1736096, ILMN_1769245, ILMN_1671260, ILMN_1713686, ILMN_1729075, ILMN_1802524, ILMN_1715927, ILMN_1663112, ILMN_1707571, ILMN_1703572, ILMN_1693604, ILMN_1663263, ILMN_1736518, ILMN_1749962, ILMN_1763834, ILMN_1656560, ILMN_1715013, ILMN_1712943, ILMN_1651817, ILMN_16…	778	3250	19113	1.34551	0.0300075	0.015118	0.0259928
SP_PIR_KEYWORDS	glycoprotein	220	28.0612	8.13221e-05	ILMN_1812946, ILMN_1791726, ILMN_1658356, ILMN_1692156, ILMN_1690223, ILMN_1722218, ILMN_1713686, ILMN_1707571, ILMN_1693604, ILMN_1663263, ILMN_1736518, ILMN_1749962, ILMN_1715013, ILMN_1651817, ILMN_1688500, ILMN_1658685, ILMN_1692739, ILMN_1710859, ILMN_1754076, ILMN_1728844, ILMN_1672611, ILMN_1695003, ILMN_1808258, ILMN_1806667, ILMN_1767145, ILMN_1654468, ILMN_1678729, ILMN_1668022, ILMN_17…	778	4318	19235	1.25966	0.0372668	0.00237087	0.11592
UP_SEQ_FEATURE	glycosylation site:N-linked (GlcNAc...)	210	26.7857	0.00020474	ILMN_1791726, ILMN_1812946, ILMN_1658356, ILMN_1692156, ILMN_1690223, ILMN_1722218, ILMN_1713686, ILMN_1707571, ILMN_1693604, ILMN_1663263, ILMN_1736518, ILMN_1749962, ILMN_1715013, ILMN_1651817, ILMN_1688500, ILMN_1658685, ILMN_1692739, ILMN_1710859, ILMN_1754076, ILMN_1728844, ILMN_1672611, ILMN_1695003, ILMN_1808258, ILMN_1806667, ILMN_1767145, ILMN_1654468, ILMN_1678729, ILMN_1668022, ILMN_17…	778	4129	19113	1.24946	0.33834	0.0665182	0.351777
UP_SEQ_FEATURE	transmembrane region	242	30.8673	0.000379521	ILMN_1812946, ILMN_1791726, ILMN_1727360, ILMN_1692156, ILMN_1690223, ILMN_1722218, ILMN_1660549, ILMN_1734276, ILMN_1713829, ILMN_1771179, ILMN_1707571, ILMN_1693604, ILMN_1663263, ILMN_1736518, ILMN_1749962, ILMN_1715013, ILMN_1651817, ILMN_1688500, ILMN_1658685, ILMN_1692739, ILMN_1692163, ILMN_1754076, ILMN_1737650, ILMN_1728844, ILMN_1672611, ILMN_1654606, ILMN_1808258, ILMN_1804419, ILMN_18…	778	4911	19113	1.21058	0.534963	0.0672365	0.651158
SP_PIR_KEYWORDS	transmembrane	243	30.9949	0.000415573	ILMN_1812946, ILMN_1791726, ILMN_1727360, ILMN_1692156, ILMN_1690223, ILMN_1722218, ILMN_1660549, ILMN_1734276, ILMN_1713829, ILMN_1771179, ILMN_1707571, ILMN_1693604, ILMN_1663263, ILMN_1736518, ILMN_1749962, ILMN_1715013, ILMN_1651817, ILMN_1688500, ILMN_1658685, ILMN_1692739, ILMN_1692163, ILMN_1754076, ILMN_1737650, ILMN_1728844, ILMN_1672611, ILMN_1654606, ILMN_1808258, ILMN_1804419, ILMN_18…	778	4973	19235	1.20809	0.176435	0.00805542	0.591065
UP_SEQ_FEATURE	topological domain:Cytoplasmic	169	21.5561	0.00216891	ILMN_1812946, ILMN_1791726, ILMN_1715496, ILMN_1727360, ILMN_1778321, ILMN_1692156, ILMN_1757020, ILMN_1676709, ILMN_1690223, ILMN_1721027, ILMN_1660549, ILMN_1727633, ILMN_1734276, ILMN_1736096, ILMN_1717923, ILMN_1671260, ILMN_1807981, ILMN_1729075, ILMN_1771179, ILMN_1802524, ILMN_1707571, ILMN_1708588, ILMN_1703572, ILMN_1693604, ILMN_1736518, ILMN_1787552, ILMN_1663263, ILMN_1749962, ILMN_17…	778	3374	19113	1.23053	0.987468	0.196656	3.66784
GOTERM_CC_FAT	GO:0031224~intrinsic to membrane	270	34.4388	0.0463903	ILMN_1812946, ILMN_1791726, ILMN_1727360, ILMN_1692156, ILMN_1690223, ILMN_1722218, ILMN_1660549, ILMN_1734276, ILMN_1713829, ILMN_1771179, ILMN_1707571, ILMN_1693604, ILMN_1663263, ILMN_1736518, ILMN_1749962, ILMN_1715013, ILMN_1651817, ILMN_1688500, ILMN_1658685, ILMN_1692739, ILMN_1692163, ILMN_1737650, ILMN_1754076, ILMN_1728844, ILMN_1672611, ILMN_1654606, ILMN_1808258, ILMN_1804419, ILMN_18…	581	5485	12782	1.08295	1	0.322024	47.9194
GOTERM_CC_FAT	GO:0016021~integral to membrane	257	32.7806	0.0959759	ILMN_1812946, ILMN_1791726, ILMN_1727360, ILMN_1692156, ILMN_1690223, ILMN_1722218, ILMN_1660549, ILMN_1734276, ILMN_1713829, ILMN_1771179, ILMN_1707571, ILMN_1693604, ILMN_1663263, ILMN_1736518, ILMN_1749962, ILMN_1715013, ILMN_1651817, ILMN_1688500, ILMN_1658685, ILMN_1692739, ILMN_1692163, ILMN_1754076, ILMN_1737650, ILMN_1728844, ILMN_1672611, ILMN_1654606, ILMN_1808258, ILMN_1804419, ILMN_18…	581	5297	12782	1.0674	1	0.496088	74.9865
UP_SEQ_FEATURE	topological domain:Extracellular	120	15.3061	0.207924	ILMN_1791726, ILMN_1812946, ILMN_1715496, ILMN_1778321, ILMN_1757020, ILMN_1690223, ILMN_1676709, ILMN_1660549, ILMN_1734276, ILMN_1727633, ILMN_1736096, ILMN_1717923, ILMN_1671260, ILMN_1807981, ILMN_1729075, ILMN_1802524, ILMN_1707571, ILMN_1708588, ILMN_1703572, ILMN_1693604, ILMN_1736518, ILMN_1787552, ILMN_1663263, ILMN_1749962, ILMN_1763834, ILMN_1656560, ILMN_1715013, ILMN_1651817, ILMN_16…	778	2719	19113	1.08423	1	0.993273	98.1897
Annotation Cluster 17	Enrichment Score: 2.9655582393773425
Category	Term	Count	%	PValue	Genes	List Total	Pop Hits	Pop Total	Fold Enrichment	Bonferroni	Benjamini	FDR
INTERPRO	IPR003961:Fibronectin, type III	22	2.80612	3.98662e-05	ILMN_1720113, ILMN_1750373, ILMN_1743455, ILMN_1674580, ILMN_1752764, ILMN_1658685, ILMN_1810962, ILMN_1676709, ILMN_1707798, ILMN_1752075, ILMN_1731215, ILMN_1717599, ILMN_1698885, ILMN_1669355, ILMN_1724350, ILMN_1738639, ILMN_1802646, ILMN_1663263, ILMN_1668022, ILMN_1764964, ILMN_1749962, ILMN_1769615, ILMN_1776640, ILMN_1722809	689	190	16659	2.79962	0.0423717	0.00862173	0.0636307
SMART	SM00060:FN3	22	2.80612	0.00012457	ILMN_1720113, ILMN_1750373, ILMN_1743455, ILMN_1674580, ILMN_1752764, ILMN_1658685, ILMN_1810962, ILMN_1676709, ILMN_1707798, ILMN_1752075, ILMN_1731215, ILMN_1717599, ILMN_1698885, ILMN_1669355, ILMN_1724350, ILMN_1738639, ILMN_1802646, ILMN_1663263, ILMN_1668022, ILMN_1764964, ILMN_1749962, ILMN_1769615, ILMN_1776640, ILMN_1722809	410	190	9079	2.56403	0.0264287	0.0133028	0.157868
INTERPRO	IPR008957:Fibronectin, type III-like fold	20	2.55102	0.00022493	ILMN_1720113, ILMN_1750373, ILMN_1743455, ILMN_1674580, ILMN_1752764, ILMN_1810962, ILMN_1676709, ILMN_1707798, ILMN_1752075, ILMN_1731215, ILMN_1717599, ILMN_1698885, ILMN_1669355, ILMN_1724350, ILMN_1738639, ILMN_1802646, ILMN_1663263, ILMN_1668022, ILMN_1749962, ILMN_1764964, ILMN_1776640, ILMN_1722809	689	184	16659	2.6281	0.216749	0.0300761	0.358516
UP_SEQ_FEATURE	domain:Fibronectin type-III 2	16	2.04082	0.000262027	ILMN_1720113, ILMN_1750373, ILMN_1743455, ILMN_1752764, ILMN_1810962, ILMN_1676709, ILMN_1752075, ILMN_1717599, ILMN_1698885, ILMN_1802646, ILMN_1663263, ILMN_1668022, ILMN_1749962, ILMN_1764964, ILMN_1776640, ILMN_1722809	778	130	19113	3.02361	0.410557	0.0727305	0.449997
UP_SEQ_FEATURE	domain:Fibronectin type-III 1	16	2.04082	0.000285031	ILMN_1720113, ILMN_1750373, ILMN_1743455, ILMN_1752764, ILMN_1810962, ILMN_1676709, ILMN_1752075, ILMN_1717599, ILMN_1698885, ILMN_1802646, ILMN_1663263, ILMN_1668022, ILMN_1749962, ILMN_1764964, ILMN_1776640, ILMN_1722809	778	131	19113	3.00053	0.437289	0.0693516	0.489413
UP_SEQ_FEATURE	domain:Fibronectin type-III 3	10	1.27551	0.00648829	ILMN_1720113, ILMN_1750373, ILMN_1743455, ILMN_1717599, ILMN_1698885, ILMN_1752764, ILMN_1810962, ILMN_1676709, ILMN_1722809, ILMN_1752075	778	83	19113	2.95986	0.999998	0.364118	10.5981
UP_SEQ_FEATURE	domain:Fibronectin type-III 4	8	1.02041	0.0126152	ILMN_1720113, ILMN_1750373, ILMN_1743455, ILMN_1717599, ILMN_1698885, ILMN_1810962, ILMN_1676709, ILMN_1722809	778	62	19113	3.16991	1	0.529115	19.627
UP_SEQ_FEATURE	domain:Fibronectin type-III 5	4	0.510204	0.276188	ILMN_1720113, ILMN_1743455, ILMN_1676709, ILMN_1722809	778	45	19113	2.18372	1	0.99761	99.6162
Annotation Cluster 18	Enrichment Score: 2.7953597992804546
Category	Term	Count	%	PValue	Genes	List Total	Pop Hits	Pop Total	Fold Enrichment	Bonferroni	Benjamini	FDR
SP_PIR_KEYWORDS	neurogenesis	18	2.29592	8.64801e-05	ILMN_1765641, ILMN_1809613, ILMN_1702787, ILMN_1742544, ILMN_1692739, ILMN_1745593, ILMN_1756959, ILMN_1653466, ILMN_1676422, ILMN_1750706, ILMN_1794370, ILMN_1773459, ILMN_1715189, ILMN_1724162, ILMN_1699574, ILMN_1676449, ILMN_1695606, ILMN_1769926	778	146	19235	3.04812	0.0395832	0.00237294	0.123268
SP_PIR_KEYWORDS	developmental protein	48	6.12245	0.00384279	ILMN_1743933, ILMN_1745593, ILMN_1736096, ILMN_1779147, ILMN_1676449, ILMN_1681777, ILMN_1765876, ILMN_1775441, ILMN_1809613, ILMN_1692739, ILMN_1796901, ILMN_1676422, ILMN_1801833, ILMN_1738657, ILMN_1794370, ILMN_1653751, ILMN_1798029, ILMN_1667487, ILMN_1691413, ILMN_1690125, ILMN_1690807, ILMN_1755158, ILMN_1744046, ILMN_1769926, ILMN_1765641, ILMN_1656383, ILMN_1742544, ILMN_1702787, ILMN_16…	778	779	19235	1.52341	0.834377	0.0546393	5.34315
SP_PIR_KEYWORDS	differentiation	30	3.82653	0.0123697	ILMN_1765641, ILMN_1656383, ILMN_1702787, ILMN_1742544, ILMN_1745593, ILMN_1653466, ILMN_1750706, ILMN_1693014, ILMN_1736096, ILMN_1724162, ILMN_1726597, ILMN_1676449, ILMN_1765876, ILMN_1669898, ILMN_1775441, ILMN_1809613, ILMN_1784783, ILMN_1756959, ILMN_1796901, ILMN_1676422, ILMN_1801833, ILMN_1794370, ILMN_1707077, ILMN_1773459, ILMN_1715189, ILMN_1690125, ILMN_1699574, ILMN_1695606, ILMN_16…	778	460	19235	1.61241	0.997011	0.138467	16.2654
Annotation Cluster 19	Enrichment Score: 2.733121553029479
Category	Term	Count	%	PValue	Genes	List Total	Pop Hits	Pop Total	Fold Enrichment	Bonferroni	Benjamini	FDR
PUBMED_ID	2059658	6	0.765306	2.10704e-06	ILMN_1672611, ILMN_1766925, ILMN_1757020, ILMN_1766675, ILMN_1769891, ILMN_1736518	783	9	27491	23.4066	0.0288755	0.00243874	0.00444127
GOTERM_BP_FAT	GO:0007155~cell adhesion	55	7.01531	1.01896e-05	ILMN_1678812, ILMN_1795937, ILMN_1798892, ILMN_1766925, ILMN_1757020, ILMN_1679460, ILMN_1676709, ILMN_1690223, ILMN_1705384, ILMN_1727633, ILMN_1806320, ILMN_1739235, ILMN_1802524, ILMN_1745817, ILMN_1807610, ILMN_1691648, ILMN_1663685, ILMN_1703572, ILMN_1736518, ILMN_1749962, ILMN_1763834, ILMN_1753502, ILMN_1675083, ILMN_1688500, ILMN_1796901, ILMN_1769891, ILMN_1700042, ILMN_1810962, ILMN_17…	568	700	13528	1.87133	0.0259269	0.000905414	0.0180368
GOTERM_BP_FAT	GO:0022610~biological adhesion	55	7.01531	1.03337e-05	ILMN_1678812, ILMN_1795937, ILMN_1798892, ILMN_1766925, ILMN_1757020, ILMN_1679460, ILMN_1676709, ILMN_1690223, ILMN_1705384, ILMN_1727633, ILMN_1806320, ILMN_1739235, ILMN_1802524, ILMN_1745817, ILMN_1807610, ILMN_1691648, ILMN_1663685, ILMN_1703572, ILMN_1736518, ILMN_1749962, ILMN_1763834, ILMN_1753502, ILMN_1675083, ILMN_1688500, ILMN_1796901, ILMN_1769891, ILMN_1700042, ILMN_1810962, ILMN_17…	568	701	13528	1.86866	0.0262886	0.000887618	0.0182918
SP_PIR_KEYWORDS	cell adhesion	35	4.46429	0.000109903	ILMN_1654072, ILMN_1766925, ILMN_1670383, ILMN_1757020, ILMN_1676709, ILMN_1690223, ILMN_1805132, ILMN_1727633, ILMN_1752075, ILMN_1736078, ILMN_1739235, ILMN_1802524, ILMN_1807610, ILMN_1691648, ILMN_1703572, ILMN_1736518, ILMN_1749962, ILMN_1722809, ILMN_1763834, ILMN_1750373, ILMN_1753502, ILMN_1688500, ILMN_1769891, ILMN_1796901, ILMN_1715458, ILMN_1670870, ILMN_1729095, ILMN_1740623, ILMN_17…	778	422	19235	2.05054	0.0500323	0.00284745	0.15663
GOTERM_BP_FAT	GO:0007156~homophilic cell adhesion	17	2.16837	0.000116439	ILMN_1688500, ILMN_1766925, ILMN_1670383, ILMN_1757020, ILMN_1769891, ILMN_1715458, ILMN_1805132, ILMN_1711208, ILMN_1752294, ILMN_1740623, ILMN_1727633, ILMN_1672611, ILMN_1698885, ILMN_1731237, ILMN_1766675, ILMN_1691648, ILMN_1703572, ILMN_1736518	568	131	13528	3.09074	0.259327	0.00695699	0.205927
PUBMED_ID	7982033	4	0.510204	0.000219675	ILMN_1672611, ILMN_1766925, ILMN_1757020, ILMN_1769891	783	5	27491	28.0879	0.952884	0.135395	0.462025
UP_SEQ_FEATURE	domain:Cadherin 1	14	1.78571	0.000332245	ILMN_1688500, ILMN_1766925, ILMN_1670383, ILMN_1757020, ILMN_1769891, ILMN_1715458, ILMN_1711208, ILMN_1805132, ILMN_1752294, ILMN_1740623, ILMN_1672611, ILMN_1731237, ILMN_1766675, ILMN_1703572, ILMN_1736518	778	105	19113	3.27558	0.488419	0.0717668	0.570264
UP_SEQ_FEATURE	domain:Cadherin 2	14	1.78571	0.000332245	ILMN_1688500, ILMN_1766925, ILMN_1670383, ILMN_1757020, ILMN_1769891, ILMN_1715458, ILMN_1711208, ILMN_1805132, ILMN_1752294, ILMN_1740623, ILMN_1672611, ILMN_1731237, ILMN_1766675, ILMN_1703572, ILMN_1736518	778	105	19113	3.27558	0.488419	0.0717668	0.570264
UP_SEQ_FEATURE	domain:Cadherin 5	13	1.65816	0.000462897	ILMN_1688500, ILMN_1766925, ILMN_1670383, ILMN_1757020, ILMN_1769891, ILMN_1715458, ILMN_1711208, ILMN_1805132, ILMN_1752294, ILMN_1740623, ILMN_1672611, ILMN_1766675, ILMN_1703572, ILMN_1736518	778	95	19113	3.36178	0.606974	0.0693172	0.793672
INTERPRO	IPR002126:Cadherin	14	1.78571	0.000505234	ILMN_1688500, ILMN_1766925, ILMN_1670383, ILMN_1757020, ILMN_1769891, ILMN_1715458, ILMN_1711208, ILMN_1805132, ILMN_1752294, ILMN_1740623, ILMN_1672611, ILMN_1731237, ILMN_1766675, ILMN_1703572, ILMN_1736518	689	108	16659	3.13425	0.42237	0.0447051	0.803604
UP_SEQ_FEATURE	domain:Cadherin 3	13	1.65816	0.00088377	ILMN_1688500, ILMN_1766925, ILMN_1670383, ILMN_1757020, ILMN_1769891, ILMN_1715458, ILMN_1711208, ILMN_1805132, ILMN_1752294, ILMN_1740623, ILMN_1672611, ILMN_1766675, ILMN_1703572, ILMN_1736518	778	102	19113	3.13107	0.831926	0.0943253	1.51014
UP_SEQ_FEATURE	domain:Cadherin 4	13	1.65816	0.00088377	ILMN_1688500, ILMN_1766925, ILMN_1670383, ILMN_1757020, ILMN_1769891, ILMN_1715458, ILMN_1711208, ILMN_1805132, ILMN_1752294, ILMN_1740623, ILMN_1672611, ILMN_1766675, ILMN_1703572, ILMN_1736518	778	102	19113	3.13107	0.831926	0.0943253	1.51014
SMART	SM00112:CA	14	1.78571	0.00108695	ILMN_1688500, ILMN_1766925, ILMN_1670383, ILMN_1757020, ILMN_1769891, ILMN_1715458, ILMN_1711208, ILMN_1805132, ILMN_1752294, ILMN_1740623, ILMN_1672611, ILMN_1731237, ILMN_1766675, ILMN_1703572, ILMN_1736518	410	108	9079	2.87051	0.208496	0.0567795	1.36978
PIR_SUPERFAMILY	PIRSF002504:cadherin	6	0.765306	0.00129425	ILMN_1672611, ILMN_1766925, ILMN_1757020, ILMN_1766675, ILMN_1769891, ILMN_1736518	319	20	7396	6.95549	0.371012	0.371012	1.76152
GOTERM_BP_FAT	GO:0016337~cell-cell adhesion	24	3.06122	0.00136103	ILMN_1779875, ILMN_1795937, ILMN_1766925, ILMN_1670383, ILMN_1757020, ILMN_1805132, ILMN_1727633, ILMN_1802524, ILMN_1691648, ILMN_1789507, ILMN_1703572, ILMN_1736518, ILMN_1749962, ILMN_1722809, ILMN_1688500, ILMN_1796901, ILMN_1769891, ILMN_1715458, ILMN_1711208, ILMN_1752294, ILMN_1740623, ILMN_1672611, ILMN_1698885, ILMN_1731237, ILMN_1766675	568	276	13528	2.07103	0.970137	0.0463395	2.38219
PUBMED_ID	9615235	4	0.510204	0.00529787	ILMN_1672611, ILMN_1766925, ILMN_1757020, ILMN_1766675	783	13	27491	10.803	1	0.842243	10.5928
INTERPRO	IPR000233:Cadherin cytoplasmic region	5	0.637755	0.00680872	ILMN_1672611, ILMN_1757020, ILMN_1766675, ILMN_1769891, ILMN_1736518	689	19	16659	6.36277	0.999401	0.219108	10.334
PUBMED_ID	10861224	3	0.382653	0.0374915	ILMN_1757020, ILMN_1766675, ILMN_1736518	783	11	27491	9.57541	1	0.999495	55.312
PUBMED_ID	10835267	6	0.765306	0.0418901	ILMN_1688500, ILMN_1670383, ILMN_1715458, ILMN_1703572, ILMN_1736518, ILMN_1752294, ILMN_1740623	783	67	27491	3.14416	1	0.999712	59.4248
PUBMED_ID	10716726	6	0.765306	0.0515814	ILMN_1688500, ILMN_1670383, ILMN_1715458, ILMN_1711208, ILMN_1703572, ILMN_1752294, ILMN_1740623	783	71	27491	2.96703	1	0.999887	67.2514
UP_SEQ_FEATURE	domain:Cadherin 6	7	0.892857	0.0761356	ILMN_1688500, ILMN_1670383, ILMN_1715458, ILMN_1805132, ILMN_1711208, ILMN_1703572, ILMN_1752294, ILMN_1740623	778	73	19113	2.35572	1	0.901221	74.4076
INTERPRO	IPR013164:Cadherin, N-terminal	6	0.765306	0.0906651	ILMN_1688500, ILMN_1670383, ILMN_1715458, ILMN_1805132, ILMN_1703572, ILMN_1752294, ILMN_1740623	689	58	16659	2.50123	1	0.795652	78.0723
PUBMED_ID	10817752	5	0.637755	0.109001	ILMN_1688500, ILMN_1670383, ILMN_1715458, ILMN_1703572, ILMN_1752294, ILMN_1740623	783	64	27491	2.74296	1	1	91.2203
UP_SEQ_FEATURE	domain:Cadherin 7	3	0.382653	0.164813	ILMN_1670383, ILMN_1711208, ILMN_1752294	778	18	19113	4.09447	1	0.98676	95.493
PUBMED_ID	10380929	3	0.382653	0.538481	ILMN_1688500, ILMN_1715458, ILMN_1711208, ILMN_1740623	783	63	27491	1.6719	1	1	100
Annotation Cluster 20	Enrichment Score: 2.5738374764518697
Category	Term	Count	%	PValue	Genes	List Total	Pop Hits	Pop Total	Fold Enrichment	Bonferroni	Benjamini	FDR
SP_PIR_KEYWORDS	neuropeptide	10	1.27551	7.49601e-06	ILMN_1794638, ILMN_1712943, ILMN_1676003, ILMN_1793006, ILMN_1812824, ILMN_1740250, ILMN_1790270, ILMN_1731062, ILMN_1747019, ILMN_1799878	778	35	19235	7.0639	0.00349453	0.000350004	0.0106904
GOTERM_MF_FAT	GO:0005184~neuropeptide hormone activity	8	1.02041	3.46409e-05	ILMN_1763344, ILMN_1794638, ILMN_1712943, ILMN_1793360, ILMN_1676003, ILMN_1668035, ILMN_1757497, ILMN_1731062	558	23	12983	8.09288	0.0275348	0.00309753	0.0532128
SP_PIR_KEYWORDS	amidation	10	1.27551	5.43328e-05	ILMN_1763344, ILMN_1794638, ILMN_1712943, ILMN_1716407, ILMN_1668035, ILMN_1793006, ILMN_1740250, ILMN_1790270, ILMN_1731062, ILMN_1669410	778	44	19235	5.61901	0.0250549	0.00169018	0.0774622
SP_PIR_KEYWORDS	amidated carboxyl end	4	0.510204	0.0292487	ILMN_1794638, ILMN_1712943, ILMN_1668035, ILMN_1669410	778	17	19235	5.81733	0.999999	0.246417	34.5164
PUBMED_ID	11278902	3	0.382653	0.0916042	ILMN_1794638, ILMN_1712943, ILMN_1731062	783	18	27491	5.85164	1	0.999998	86.8024
GOTERM_MF_FAT	GO:0005179~hormone activity	9	1.14796	0.0925011	ILMN_1763344, ILMN_1794638, ILMN_1712943, ILMN_1793360, ILMN_1676003, ILMN_1668035, ILMN_1757497, ILMN_1812824, ILMN_1731062	558	108	12983	1.93892	1	0.752665	77.4939
SP_PIR_KEYWORDS	hormone	6	0.765306	0.275098	ILMN_1763344, ILMN_1794638, ILMN_1712943, ILMN_1793360, ILMN_1668035, ILMN_1812824	778	87	19235	1.70508	1	0.815133	98.9831
Annotation Cluster 21	Enrichment Score: 2.5490881710773903
Category	Term	Count	%	PValue	Genes	List Total	Pop Hits	Pop Total	Fold Enrichment	Bonferroni	Benjamini	FDR
GOTERM_CC_FAT	GO:0031410~cytoplasmic vesicle	47	5.9949	0.00139669	ILMN_1658835, ILMN_1674580, ILMN_1798892, ILMN_1676609, ILMN_1685078, ILMN_1682929, ILMN_1725193, ILMN_1712806, ILMN_1662927, ILMN_1810782, ILMN_1666904, ILMN_1809695, ILMN_1678143, ILMN_1715013, ILMN_1762825, ILMN_1675083, ILMN_1805807, ILMN_1710859, ILMN_1654422, ILMN_1771622, ILMN_1695003, ILMN_1699692, ILMN_1724350, ILMN_1752299, ILMN_1810235, ILMN_1747979, ILMN_1654468, ILMN_1737611, ILMN_17…	581	642	12782	1.61059	0.395382	0.0309581	1.90125
SP_PIR_KEYWORDS	cytoplasmic vesicle	21	2.67857	0.00164638	ILMN_1737162, ILMN_1731206, ILMN_1674580, ILMN_1676609, ILMN_1757497, ILMN_1808136, ILMN_1712806, ILMN_1662927, ILMN_1810782, ILMN_1669355, ILMN_1667381, ILMN_1767842, ILMN_1666904, ILMN_1808501, ILMN_1805807, ILMN_1710859, ILMN_1771622, ILMN_1695003, ILMN_1724350, ILMN_1752299, ILMN_1727479, ILMN_1737611, ILMN_1654468, ILMN_1657760, ILMN_1755571	778	238	19235	2.1815	0.536751	0.0271076	2.32262
GOTERM_CC_FAT	GO:0031982~vesicle	47	5.9949	0.0031474	ILMN_1658835, ILMN_1674580, ILMN_1798892, ILMN_1676609, ILMN_1685078, ILMN_1682929, ILMN_1725193, ILMN_1712806, ILMN_1662927, ILMN_1810782, ILMN_1666904, ILMN_1809695, ILMN_1678143, ILMN_1715013, ILMN_1762825, ILMN_1675083, ILMN_1805807, ILMN_1710859, ILMN_1654422, ILMN_1771622, ILMN_1695003, ILMN_1699692, ILMN_1724350, ILMN_1752299, ILMN_1810235, ILMN_1747979, ILMN_1654468, ILMN_1737611, ILMN_17…	581	670	12782	1.54328	0.67853	0.0579803	4.2371
GOTERM_CC_FAT	GO:0016023~cytoplasmic membrane-bounded vesicle	40	5.10204	0.00382734	ILMN_1737162, ILMN_1653762, ILMN_1731206, ILMN_1674580, ILMN_1658835, ILMN_1768486, ILMN_1798892, ILMN_1676609, ILMN_1685078, ILMN_1757497, ILMN_1682929, ILMN_1808136, ILMN_1712806, ILMN_1736078, ILMN_1662927, ILMN_1669355, ILMN_1666445, ILMN_1804556, ILMN_1801205, ILMN_1767842, ILMN_1757081, ILMN_1666904, ILMN_1809695, ILMN_1799878, ILMN_1678143, ILMN_1762825, ILMN_1675083, ILMN_1777190, ILMN_17…	581	550	12782	1.6	0.748544	0.0636234	5.1303
GOTERM_CC_FAT	GO:0031988~membrane-bounded vesicle	40	5.10204	0.00648755	ILMN_1737162, ILMN_1653762, ILMN_1731206, ILMN_1674580, ILMN_1658835, ILMN_1768486, ILMN_1798892, ILMN_1676609, ILMN_1685078, ILMN_1757497, ILMN_1682929, ILMN_1808136, ILMN_1712806, ILMN_1736078, ILMN_1662927, ILMN_1669355, ILMN_1666445, ILMN_1804556, ILMN_1801205, ILMN_1767842, ILMN_1757081, ILMN_1666904, ILMN_1809695, ILMN_1799878, ILMN_1678143, ILMN_1762825, ILMN_1675083, ILMN_1777190, ILMN_17…	581	568	12782	1.5493	0.903973	0.0930158	8.55118
Annotation Cluster 22	Enrichment Score: 2.4755786167717324
Category	Term	Count	%	PValue	Genes	List Total	Pop Hits	Pop Total	Fold Enrichment	Bonferroni	Benjamini	FDR
INTERPRO	IPR018248:EF hand	19	2.42347	6.58225e-06	ILMN_1750181, ILMN_1779401, ILMN_1798892, ILMN_1732636, ILMN_1744403, ILMN_1785265, ILMN_1815033, ILMN_1663437, ILMN_1679949, ILMN_1695941, ILMN_1677746, ILMN_1654422, ILMN_1652017, ILMN_1699562, ILMN_1747979, ILMN_1749738, ILMN_1761463, ILMN_1656899, ILMN_1695645	689	130	16659	3.53378	0.00712285	0.00356779	0.0105086
INTERPRO	IPR018247:EF-HAND 1	22	2.80612	0.000265495	ILMN_1731206, ILMN_1750181, ILMN_1779401, ILMN_1795251, ILMN_1798892, ILMN_1709101, ILMN_1732636, ILMN_1744403, ILMN_1789361, ILMN_1785265, ILMN_1815033, ILMN_1663437, ILMN_1679949, ILMN_1695941, ILMN_1752247, ILMN_1677746, ILMN_1652017, ILMN_1699562, ILMN_1747979, ILMN_1749738, ILMN_1761463, ILMN_1656899, ILMN_1695645	689	217	16659	2.45128	0.250513	0.0315328	0.423043
INTERPRO	IPR002048:Calcium-binding EF-hand	17	2.16837	0.000279442	ILMN_1779401, ILMN_1798892, ILMN_1732636, ILMN_1744403, ILMN_1785265, ILMN_1815033, ILMN_1663437, ILMN_1679949, ILMN_1695941, ILMN_1677746, ILMN_1654422, ILMN_1652017, ILMN_1699562, ILMN_1747979, ILMN_1761463, ILMN_1656899, ILMN_1695645	689	143	16659	2.87437	0.261782	0.0298956	0.44522
INTERPRO	IPR011992:EF-Hand type	23	2.93367	0.000326879	ILMN_1731206, ILMN_1750181, ILMN_1779401, ILMN_1795251, ILMN_1798892, ILMN_1744403, ILMN_1785202, ILMN_1785265, ILMN_1815033, ILMN_1663437, ILMN_1724066, ILMN_1679949, ILMN_1695941, ILMN_1677746, ILMN_1654422, ILMN_1652017, ILMN_1699562, ILMN_1747979, ILMN_1761463, ILMN_1749738, ILMN_1656899, ILMN_1723969, ILMN_1695645	689	236	16659	2.35638	0.29886	0.0317618	0.520614
UP_SEQ_FEATURE	calcium-binding region:1	15	1.91327	0.000610374	ILMN_1779401, ILMN_1732636, ILMN_1744403, ILMN_1785265, ILMN_1815033, ILMN_1663437, ILMN_1679949, ILMN_1695941, ILMN_1677746, ILMN_1652017, ILMN_1699562, ILMN_1761463, ILMN_1747979, ILMN_1656899, ILMN_1695645	778	126	19113	2.92462	0.708145	0.0842064	1.04528
INTERPRO	IPR018249:EF-HAND 2	21	2.67857	0.000612699	ILMN_1731206, ILMN_1750181, ILMN_1779401, ILMN_1795251, ILMN_1798892, ILMN_1732636, ILMN_1744403, ILMN_1785265, ILMN_1815033, ILMN_1663437, ILMN_1679949, ILMN_1695941, ILMN_1677746, ILMN_1654422, ILMN_1652017, ILMN_1699562, ILMN_1747979, ILMN_1749738, ILMN_1761463, ILMN_1656899, ILMN_1695645	689	215	16659	2.36162	0.486032	0.0434029	0.973752
SMART	SM00054:EFh	17	2.16837	0.000684594	ILMN_1779401, ILMN_1798892, ILMN_1732636, ILMN_1744403, ILMN_1785265, ILMN_1815033, ILMN_1663437, ILMN_1679949, ILMN_1695941, ILMN_1677746, ILMN_1654422, ILMN_1652017, ILMN_1699562, ILMN_1747979, ILMN_1761463, ILMN_1656899, ILMN_1695645	410	143	9079	2.63249	0.136912	0.0478944	0.864758
UP_SEQ_FEATURE	calcium-binding region:2	14	1.78571	0.000802328	ILMN_1779401, ILMN_1732636, ILMN_1744403, ILMN_1785265, ILMN_1815033, ILMN_1663437, ILMN_1679949, ILMN_1677746, ILMN_1652017, ILMN_1699562, ILMN_1761463, ILMN_1747979, ILMN_1656899, ILMN_1695645	778	115	19113	2.99075	0.801892	0.0962333	1.37188
UP_SEQ_FEATURE	domain:EF-hand 2	17	2.16837	0.00315687	ILMN_1779401, ILMN_1798892, ILMN_1732636, ILMN_1744403, ILMN_1785265, ILMN_1815033, ILMN_1663437, ILMN_1679949, ILMN_1695941, ILMN_1677746, ILMN_1654422, ILMN_1652017, ILMN_1699562, ILMN_1747979, ILMN_1761463, ILMN_1656899, ILMN_1695645	778	182	19113	2.2947	0.998301	0.25165	5.29622
UP_SEQ_FEATURE	domain:EF-hand 1	16	2.04082	0.00752716	ILMN_1779401, ILMN_1798892, ILMN_1732636, ILMN_1785265, ILMN_1815033, ILMN_1663437, ILMN_1679949, ILMN_1695941, ILMN_1677746, ILMN_1654422, ILMN_1652017, ILMN_1699562, ILMN_1761463, ILMN_1747979, ILMN_1656899, ILMN_1695645	778	182	19113	2.15972	1	0.378886	12.1934
UP_SEQ_FEATURE	domain:EF-hand 3	9	1.14796	0.0374408	ILMN_1779401, ILMN_1652017, ILMN_1744403, ILMN_1699562, ILMN_1815033, ILMN_1747979, ILMN_1679949, ILMN_1677746, ILMN_1695645	778	94	19113	2.35214	1	0.778909	48.1459
INTERPRO	IPR001125:Recoverin	4	0.510204	0.0602698	ILMN_1744403, ILMN_1699562, ILMN_1815033, ILMN_1747979	689	22	16659	4.39609	1	0.70046	62.9341
PIR_SUPERFAMILY	PIRSF002350:calmodulin	4	0.510204	0.081845	ILMN_1779401, ILMN_1815033, ILMN_1747979, ILMN_1695645	319	24	7396	3.86416	1	0.999962	69.0182
UP_SEQ_FEATURE	domain:EF-hand 4	6	0.765306	0.0911713	ILMN_1779401, ILMN_1744403, ILMN_1815033, ILMN_1747979, ILMN_1677746, ILMN_1695645	778	59	19113	2.49832	1	0.928739	80.704
COG_ONTOLOGY	Signal transduction mechanisms / Cytoskeleton / Cell division and chromosome partitioning / General function prediction only	4	0.510204	0.104659	ILMN_1750181, ILMN_1744403, ILMN_1815033, ILMN_1747979	53	43	1950	3.42255	0.921344	0.921344	58.3666
UP_SEQ_FEATURE	calcium-binding region:3	4	0.510204	0.179079	ILMN_1699562, ILMN_1815033, ILMN_1747979, ILMN_1677746	778	36	19113	2.72965	1	0.990226	96.6495
Annotation Cluster 23	Enrichment Score: 2.4291480841586157
Category	Term	Count	%	PValue	Genes	List Total	Pop Hits	Pop Total	Fold Enrichment	Bonferroni	Benjamini	FDR
INTERPRO	IPR011993:Pleckstrin homology-type	30	3.82653	2.40926e-05	ILMN_1678353, ILMN_1657129, ILMN_1795937, ILMN_1752750, ILMN_1799115, ILMN_1707798, ILMN_1803423, ILMN_1785175, ILMN_1658081, ILMN_1752247, ILMN_1690963, ILMN_1735798, ILMN_1671486, ILMN_1669497, ILMN_1765876, ILMN_1770905, ILMN_1777998, ILMN_1775441, ILMN_1809613, ILMN_1685441, ILMN_1793517, ILMN_1709101, ILMN_1700042, ILMN_1772686, ILMN_1801833, ILMN_1728572, ILMN_1766654, ILMN_1802690, ILMN_18…	689	303	16659	2.39391	0.0258256	0.00651988	0.0384589
GOTERM_BP_FAT	GO:0008624~induction of apoptosis by extracellular signals	16	2.04082	6.56647e-05	ILMN_1809613, ILMN_1668035, ILMN_1708340, ILMN_1709101, ILMN_1752750, ILMN_1803423, ILMN_1707798, ILMN_1772686, ILMN_1752247, ILMN_1707077, ILMN_1771800, ILMN_1724863, ILMN_1728650, ILMN_1715637, ILMN_1812824, ILMN_1666076, ILMN_1672878	568	112	13528	3.40241	0.155735	0.00444507	0.11618
GOTERM_MF_FAT	GO:0008047~enzyme activator activity	30	3.82653	0.000262333	ILMN_1684321, ILMN_1779875, ILMN_1778267, ILMN_1732923, ILMN_1670054, ILMN_1803423, ILMN_1774945, ILMN_1698307, ILMN_1758067, ILMN_1734742, ILMN_1690963, ILMN_1678493, ILMN_1765876, ILMN_1741540, ILMN_1717803, ILMN_1777998, ILMN_1775441, ILMN_1678143, ILMN_1793517, ILMN_1685441, ILMN_1722726, ILMN_1711617, ILMN_1661622, ILMN_1692664, ILMN_1653894, ILMN_1801833, ILMN_1671777, ILMN_1662198, ILMN_16…	558	335	12983	2.08361	0.190605	0.0161352	0.40232
GOTERM_MF_FAT	GO:0030695~GTPase regulator activity	34	4.33673	0.000295808	ILMN_1678353, ILMN_1779875, ILMN_1778267, ILMN_1752750, ILMN_1732923, ILMN_1682929, ILMN_1707798, ILMN_1803423, ILMN_1752247, ILMN_1758067, ILMN_1734742, ILMN_1690963, ILMN_1728650, ILMN_1678493, ILMN_1765876, ILMN_1741540, ILMN_1777998, ILMN_1775441, ILMN_1678143, ILMN_1742003, ILMN_1809613, ILMN_1722037, ILMN_1685441, ILMN_1793517, ILMN_1709101, ILMN_1722726, ILMN_1661622, ILMN_1692664, ILMN_17…	558	404	12983	1.95812	0.212157	0.0168884	0.453548
GOTERM_MF_FAT	GO:0060589~nucleoside-triphosphatase regulator activity	34	4.33673	0.000438507	ILMN_1678353, ILMN_1779875, ILMN_1778267, ILMN_1752750, ILMN_1732923, ILMN_1682929, ILMN_1707798, ILMN_1803423, ILMN_1752247, ILMN_1758067, ILMN_1734742, ILMN_1690963, ILMN_1728650, ILMN_1678493, ILMN_1765876, ILMN_1741540, ILMN_1777998, ILMN_1775441, ILMN_1678143, ILMN_1742003, ILMN_1809613, ILMN_1722037, ILMN_1685441, ILMN_1793517, ILMN_1709101, ILMN_1722726, ILMN_1661622, ILMN_1692664, ILMN_17…	558	413	12983	1.91545	0.297784	0.0218523	0.671652
GOTERM_MF_FAT	GO:0005096~GTPase activator activity	22	2.80612	0.000510299	ILMN_1678143, ILMN_1779875, ILMN_1793517, ILMN_1685441, ILMN_1778267, ILMN_1722726, ILMN_1732923, ILMN_1803423, ILMN_1692664, ILMN_1661622, ILMN_1653894, ILMN_1801833, ILMN_1662198, ILMN_1758067, ILMN_1690963, ILMN_1734742, ILMN_1696828, ILMN_1765876, ILMN_1678493, ILMN_1736112, ILMN_1741540, ILMN_1777998, ILMN_1775441, ILMN_1672878	558	220	12983	2.3267	0.337282	0.0239099	0.781213
INTERPRO	IPR001849:Pleckstrin homology	25	3.18878	0.00052115	ILMN_1678353, ILMN_1657129, ILMN_1752750, ILMN_1803423, ILMN_1707798, ILMN_1785175, ILMN_1752247, ILMN_1659106, ILMN_1690963, ILMN_1735798, ILMN_1728650, ILMN_1669497, ILMN_1765876, ILMN_1777998, ILMN_1775441, ILMN_1809613, ILMN_1685441, ILMN_1793517, ILMN_1709101, ILMN_1772686, ILMN_1801833, ILMN_1728572, ILMN_1766654, ILMN_1773063, ILMN_1765860, ILMN_1736112, ILMN_1666076, ILMN_1672878	689	277	16659	2.18218	0.432274	0.0426128	0.828821
UP_SEQ_FEATURE	domain:PH	22	2.80612	0.000710882	ILMN_1657129, ILMN_1752750, ILMN_1803423, ILMN_1785175, ILMN_1752247, ILMN_1659106, ILMN_1735798, ILMN_1690963, ILMN_1728650, ILMN_1669497, ILMN_1765876, ILMN_1777998, ILMN_1775441, ILMN_1809613, ILMN_1685441, ILMN_1793517, ILMN_1709101, ILMN_1801833, ILMN_1728572, ILMN_1766654, ILMN_1773063, ILMN_1765860, ILMN_1736112, ILMN_1666076, ILMN_1672878	778	237	19113	2.28047	0.761732	0.0911943	1.21642
SMART	SM00233:PH	25	3.18878	0.00156422	ILMN_1678353, ILMN_1657129, ILMN_1752750, ILMN_1803423, ILMN_1707798, ILMN_1785175, ILMN_1752247, ILMN_1659106, ILMN_1690963, ILMN_1735798, ILMN_1728650, ILMN_1669497, ILMN_1765876, ILMN_1777998, ILMN_1775441, ILMN_1809613, ILMN_1685441, ILMN_1793517, ILMN_1709101, ILMN_1772686, ILMN_1801833, ILMN_1728572, ILMN_1766654, ILMN_1773063, ILMN_1765860, ILMN_1736112, ILMN_1666076, ILMN_1672878	410	277	9079	1.99855	0.285785	0.0650987	1.96577
GOTERM_MF_FAT	GO:0005083~small GTPase regulator activity	24	3.06122	0.00165205	ILMN_1678353, ILMN_1779875, ILMN_1752750, ILMN_1682929, ILMN_1803423, ILMN_1707798, ILMN_1752247, ILMN_1734742, ILMN_1690963, ILMN_1728650, ILMN_1741540, ILMN_1678143, ILMN_1809613, ILMN_1742003, ILMN_1685441, ILMN_1722037, ILMN_1793517, ILMN_1709101, ILMN_1661622, ILMN_1772686, ILMN_1653894, ILMN_1662198, ILMN_1736112, ILMN_1666076, ILMN_1672878	558	274	12983	2.03799	0.736224	0.0562949	2.5085
SP_PIR_KEYWORDS	GTPase activation	16	2.04082	0.00200519	ILMN_1678143, ILMN_1793517, ILMN_1722726, ILMN_1732923, ILMN_1692664, ILMN_1661622, ILMN_1653894, ILMN_1801833, ILMN_1662198, ILMN_1690963, ILMN_1734742, ILMN_1765876, ILMN_1678493, ILMN_1736112, ILMN_1741540, ILMN_1777998, ILMN_1775441, ILMN_1672878	778	159	19235	2.48791	0.608341	0.0318061	2.82211
INTERPRO	IPR000219:Dbl homology (DH) domain	10	1.27551	0.00204956	ILMN_1678353, ILMN_1728650, ILMN_1809613, ILMN_1709101, ILMN_1752750, ILMN_1803423, ILMN_1707798, ILMN_1772686, ILMN_1752247, ILMN_1666076, ILMN_1672878	689	69	16659	3.50413	0.892268	0.105424	3.22258
SMART	SM00325:RhoGEF	10	1.27551	0.00360078	ILMN_1678353, ILMN_1728650, ILMN_1809613, ILMN_1709101, ILMN_1752750, ILMN_1803423, ILMN_1707798, ILMN_1772686, ILMN_1752247, ILMN_1666076, ILMN_1672878	410	69	9079	3.20926	0.539556	0.104878	4.47179
INTERPRO	IPR001331:Guanine-nucleotide dissociation stimulator, CDC24, conserved site	9	1.14796	0.00423481	ILMN_1678353, ILMN_1728650, ILMN_1809613, ILMN_1709101, ILMN_1752750, ILMN_1803423, ILMN_1707798, ILMN_1752247, ILMN_1666076, ILMN_1672878	689	63	16659	3.45407	0.990036	0.189002	6.55112
GOTERM_MF_FAT	GO:0005089~Rho guanyl-nucleotide exchange factor activity	10	1.27551	0.00425156	ILMN_1678353, ILMN_1728650, ILMN_1809613, ILMN_1709101, ILMN_1752750, ILMN_1803423, ILMN_1707798, ILMN_1772686, ILMN_1752247, ILMN_1666076, ILMN_1672878	558	74	12983	3.14419	0.967744	0.13332	6.33681
UP_SEQ_FEATURE	domain:Rho-GAP	9	1.14796	0.00468807	ILMN_1722726, ILMN_1765876, ILMN_1678493, ILMN_1692664, ILMN_1736112, ILMN_1705466, ILMN_1653894, ILMN_1801833, ILMN_1777998, ILMN_1775441, ILMN_1672878	778	65	19113	3.40156	0.999923	0.315538	7.76885
UP_SEQ_FEATURE	domain:DH	9	1.14796	0.00564451	ILMN_1678353, ILMN_1728650, ILMN_1809613, ILMN_1709101, ILMN_1752750, ILMN_1803423, ILMN_1772686, ILMN_1752247, ILMN_1666076, ILMN_1672878	778	67	19113	3.30002	0.999989	0.33486	9.28236
INTERPRO	IPR000198:RhoGAP	9	1.14796	0.00617805	ILMN_1722726, ILMN_1765876, ILMN_1678493, ILMN_1692664, ILMN_1736112, ILMN_1705466, ILMN_1653894, ILMN_1801833, ILMN_1777998, ILMN_1775441, ILMN_1672878	689	67	16659	3.24786	0.998806	0.213658	9.42062
GOTERM_BP_FAT	GO:0035023~regulation of Rho protein signal transduction	11	1.40306	0.00847761	ILMN_1678353, ILMN_1728650, ILMN_1809613, ILMN_1709101, ILMN_1752750, ILMN_1803423, ILMN_1707798, ILMN_1772686, ILMN_1653894, ILMN_1752247, ILMN_1666076, ILMN_1672878	568	99	13528	2.64632	1	0.190261	13.9908
SMART	SM00324:RhoGAP	9	1.14796	0.0100683	ILMN_1722726, ILMN_1765876, ILMN_1678493, ILMN_1692664, ILMN_1736112, ILMN_1705466, ILMN_1653894, ILMN_1801833, ILMN_1777998, ILMN_1775441, ILMN_1672878	410	67	9079	2.97455	0.886465	0.195525	12.0442
GOTERM_MF_FAT	GO:0005088~Ras guanyl-nucleotide exchange factor activity	10	1.27551	0.0129952	ILMN_1678353, ILMN_1728650, ILMN_1809613, ILMN_1709101, ILMN_1752750, ILMN_1803423, ILMN_1707798, ILMN_1772686, ILMN_1752247, ILMN_1666076, ILMN_1672878	558	88	12983	2.64398	0.999974	0.280689	18.2072
SP_PIR_KEYWORDS	guanine-nucleotide releasing factor	11	1.40306	0.0247887	ILMN_1678353, ILMN_1728650, ILMN_1809613, ILMN_1709101, ILMN_1752750, ILMN_1765860, ILMN_1803423, ILMN_1707798, ILMN_1772686, ILMN_1752247, ILMN_1666076, ILMN_1672878	778	121	19235	2.2476	0.999992	0.224953	30.0924
GOTERM_BP_FAT	GO:0046578~regulation of Ras protein signal transduction	15	1.91327	0.0587261	ILMN_1678353, ILMN_1809613, ILMN_1685441, ILMN_1709101, ILMN_1752750, ILMN_1803423, ILMN_1661622, ILMN_1707798, ILMN_1653894, ILMN_1772686, ILMN_1752247, ILMN_1690963, ILMN_1728650, ILMN_1741540, ILMN_1666076, ILMN_1672878	568	210	13528	1.70121	1	0.577686	65.7466
GOTERM_BP_FAT	GO:0051056~regulation of small GTPase mediated signal transduction	17	2.16837	0.0647946	ILMN_1678353, ILMN_1809613, ILMN_1793517, ILMN_1685441, ILMN_1709101, ILMN_1732923, ILMN_1752750, ILMN_1803423, ILMN_1661622, ILMN_1707798, ILMN_1653894, ILMN_1772686, ILMN_1752247, ILMN_1690963, ILMN_1728650, ILMN_1741540, ILMN_1666076, ILMN_1672878	568	252	13528	1.6067	1	0.597047	69.4524
GOTERM_MF_FAT	GO:0005085~guanyl-nucleotide exchange factor activity	11	1.40306	0.118432	ILMN_1678353, ILMN_1728650, ILMN_1809613, ILMN_1709101, ILMN_1752750, ILMN_1765860, ILMN_1803423, ILMN_1707798, ILMN_1772686, ILMN_1752247, ILMN_1666076, ILMN_1672878	558	152	12983	1.6838	1	0.805767	85.5839
GOTERM_BP_FAT	GO:0043087~regulation of GTPase activity	7	0.892857	0.411923	ILMN_1690963, ILMN_1779875, ILMN_1685441, ILMN_1661622, ILMN_1772686, ILMN_1653894, ILMN_1741540	568	123	13528	1.35543	1	0.974002	99.9917
GOTERM_BP_FAT	GO:0032318~regulation of Ras GTPase activity	6	0.765306	0.44264	ILMN_1690963, ILMN_1685441, ILMN_1661622, ILMN_1772686, ILMN_1653894, ILMN_1741540	568	104	13528	1.37405	1	0.978598	99.9968
Annotation Cluster 24	Enrichment Score: 2.4167050318775836
Category	Term	Count	%	PValue	Genes	List Total	Pop Hits	Pop Total	Fold Enrichment	Bonferroni	Benjamini	FDR
UP_SEQ_FEATURE	region of interest:Calmodulin-binding	10	1.27551	0.00034338	ILMN_1664125, ILMN_1804339, ILMN_1805098, ILMN_1712023, ILMN_1666445, ILMN_1708340, ILMN_1776516, ILMN_1697189, ILMN_1774132, ILMN_1809695	778	55	19113	4.4667	0.499785	0.0669268	0.589322
GOTERM_MF_FAT	GO:0005516~calmodulin binding	14	1.78571	0.00716218	ILMN_1664125, ILMN_1804339, ILMN_1712023, ILMN_1805098, ILMN_1708340, ILMN_1705686, ILMN_1758067, ILMN_1666445, ILMN_1667381, ILMN_1776516, ILMN_1697189, ILMN_1774132, ILMN_1809695, ILMN_1669714	558	140	12983	2.3267	0.996953	0.199746	10.4563
SP_PIR_KEYWORDS	calmodulin-binding	12	1.53061	0.00933104	ILMN_1664125, ILMN_1804339, ILMN_1805098, ILMN_1712023, ILMN_1666445, ILMN_1708340, ILMN_1705686, ILMN_1776516, ILMN_1697189, ILMN_1774132, ILMN_1809695, ILMN_1669714	778	120	19235	2.47237	0.98745	0.108823	12.5152
GOTERM_MF_FAT	GO:0004683~calmodulin-dependent protein kinase activity	5	0.637755	0.0093849	ILMN_1804339, ILMN_1666445, ILMN_1776516, ILMN_1697189, ILMN_1809695	558	20	12983	5.81676	0.9995	0.237709	13.4875
Annotation Cluster 25	Enrichment Score: 2.3068539857823747
Category	Term	Count	%	PValue	Genes	List Total	Pop Hits	Pop Total	Fold Enrichment	Bonferroni	Benjamini	FDR
INTERPRO	IPR018029:C2 membrane targeting protein	13	1.65816	0.00141286	ILMN_1793517, ILMN_1810550, ILMN_1814770, ILMN_1682929, ILMN_1806908, ILMN_1724066, ILMN_1722294, ILMN_1806500, ILMN_1771800, ILMN_1716563, ILMN_1657760, ILMN_1755571, ILMN_1672878, ILMN_1723969	689	106	16659	2.96529	0.784642	0.081766	2.23206
INTERPRO	IPR000008:C2 calcium-dependent membrane targeting	14	1.78571	0.00442197	ILMN_1793517, ILMN_1652512, ILMN_1810550, ILMN_1814770, ILMN_1682929, ILMN_1806908, ILMN_1724066, ILMN_1722294, ILMN_1806500, ILMN_1771800, ILMN_1716563, ILMN_1657760, ILMN_1723969, ILMN_1755571, ILMN_1672878	689	137	16659	2.4708	0.991876	0.18171	6.83117
UP_SEQ_FEATURE	domain:C2 1	8	1.02041	0.0073258	ILMN_1793517, ILMN_1810550, ILMN_1814770, ILMN_1682929, ILMN_1722294, ILMN_1806500, ILMN_1657760, ILMN_1755571	778	56	19113	3.50955	1	0.380228	11.8863
UP_SEQ_FEATURE	domain:C2 2	8	1.02041	0.0073258	ILMN_1793517, ILMN_1810550, ILMN_1814770, ILMN_1682929, ILMN_1722294, ILMN_1806500, ILMN_1657760, ILMN_1755571	778	56	19113	3.50955	1	0.380228	11.8863
SMART	SM00239:C2	14	1.78571	0.00871573	ILMN_1793517, ILMN_1652512, ILMN_1810550, ILMN_1814770, ILMN_1682929, ILMN_1806908, ILMN_1724066, ILMN_1722294, ILMN_1806500, ILMN_1771800, ILMN_1716563, ILMN_1657760, ILMN_1723969, ILMN_1755571, ILMN_1672878	410	137	9079	2.26288	0.847729	0.188703	10.5079
Annotation Cluster 26	Enrichment Score: 2.255387723709594
Category	Term	Count	%	PValue	Genes	List Total	Pop Hits	Pop Total	Fold Enrichment	Bonferroni	Benjamini	FDR
PUBMED_ID	11389904	3	0.382653	0.00237859	ILMN_1654422, ILMN_1651900, ILMN_1790508	783	3	27491	35.1098	1	0.622431	4.89581
PUBMED_ID	12860415	3	0.382653	0.00466741	ILMN_1654422, ILMN_1651900, ILMN_1790508	783	4	27491	26.3324	1	0.8195	9.39066
PUBMED_ID	12435606	3	0.382653	0.0154327	ILMN_1654422, ILMN_1651900, ILMN_1790508	783	7	27491	15.0471	1	0.98438	27.9519
Annotation Cluster 27	Enrichment Score: 2.223452685307698
Category	Term	Count	%	PValue	Genes	List Total	Pop Hits	Pop Total	Fold Enrichment	Bonferroni	Benjamini	FDR
UP_SEQ_FEATURE	domain:PKD	4	0.510204	0.00207164	ILMN_1748812, ILMN_1680251, ILMN_1695935, ILMN_1801205, ILMN_1665492	778	7	19113	14.0382	0.984745	0.197601	3.50609
INTERPRO	IPR000601:PKD	4	0.510204	0.00902497	ILMN_1748812, ILMN_1680251, ILMN_1695935, ILMN_1801205, ILMN_1665492	689	11	16659	8.79219	0.999947	0.272107	13.4757
SMART	SM00089:PKD	4	0.510204	0.0114257	ILMN_1748812, ILMN_1680251, ILMN_1695935, ILMN_1801205, ILMN_1665492	410	11	9079	8.05233	0.915471	0.201169	13.5616
Annotation Cluster 28	Enrichment Score: 2.1726350660446725
Category	Term	Count	%	PValue	Genes	List Total	Pop Hits	Pop Total	Fold Enrichment	Bonferroni	Benjamini	FDR
GOTERM_BP_FAT	GO:0046887~positive regulation of hormone secretion	8	1.02041	0.000633014	ILMN_1713756, ILMN_1691413, ILMN_1668035, ILMN_1698554, ILMN_1740250, ILMN_1682757, ILMN_1814719, ILMN_1673521	568	36	13528	5.29264	0.804545	0.0255787	1.1147
GOTERM_BP_FAT	GO:0046883~regulation of hormone secretion	10	1.27551	0.00164344	ILMN_1713756, ILMN_1691413, ILMN_1668035, ILMN_1698554, ILMN_1659197, ILMN_1740250, ILMN_1682757, ILMN_1814719, ILMN_1673521, ILMN_1799878	568	66	13528	3.60862	0.985596	0.0542651	2.86973
GOTERM_BP_FAT	GO:0032024~positive regulation of insulin secretion	5	0.637755	0.00584384	ILMN_1713756, ILMN_1691413, ILMN_1698554, ILMN_1682757, ILMN_1814719	568	18	13528	6.61581	1	0.152987	9.85539
GOTERM_BP_FAT	GO:0002793~positive regulation of peptide secretion	5	0.637755	0.0143338	ILMN_1713756, ILMN_1691413, ILMN_1698554, ILMN_1682757, ILMN_1814719	568	23	13528	5.17759	1	0.262936	22.5535
GOTERM_BP_FAT	GO:0050796~regulation of insulin secretion	6	0.765306	0.0249226	ILMN_1713756, ILMN_1691413, ILMN_1698554, ILMN_1659197, ILMN_1682757, ILMN_1814719	568	40	13528	3.57254	1	0.375924	36.0321
GOTERM_BP_FAT	GO:0002791~regulation of peptide secretion	6	0.765306	0.0424005	ILMN_1713756, ILMN_1691413, ILMN_1698554, ILMN_1659197, ILMN_1682757, ILMN_1814719	568	46	13528	3.10655	1	0.489749	53.5586
Annotation Cluster 29	Enrichment Score: 2.1118938340763824
Category	Term	Count	%	PValue	Genes	List Total	Pop Hits	Pop Total	Fold Enrichment	Bonferroni	Benjamini	FDR
PUBMED_ID	12044471	3	0.382653	0.00237859	ILMN_1749738, ILMN_1663437, ILMN_1695941	783	3	27491	35.1098	1	0.622431	4.89581
UP_SEQ_FEATURE	domain:ABM	3	0.382653	0.00481799	ILMN_1749738, ILMN_1663437, ILMN_1695941	778	3	19113	24.5668	0.999941	0.312483	7.97584
INTERPRO	IPR007138:Antibiotic biosynthesis monooxygenase	3	0.382653	0.0049694	ILMN_1749738, ILMN_1663437, ILMN_1695941	689	3	16659	24.1785	0.995529	0.194594	7.64573
GOTERM_BP_FAT	GO:0016999~antibiotic metabolic process	3	0.382653	0.0051147	ILMN_1749738, ILMN_1663437, ILMN_1695941	568	3	13528	23.8169	0.999998	0.136606	8.67779
GOTERM_BP_FAT	GO:0017000~antibiotic biosynthetic process	3	0.382653	0.0051147	ILMN_1749738, ILMN_1663437, ILMN_1695941	568	3	13528	23.8169	0.999998	0.136606	8.67779
GOTERM_BP_FAT	GO:0017144~drug metabolic process	3	0.382653	0.143056	ILMN_1749738, ILMN_1663437, ILMN_1695941	568	16	13528	4.46567	1	0.808229	93.4976
Annotation Cluster 30	Enrichment Score: 2.0768437726840454
Category	Term	Count	%	PValue	Genes	List Total	Pop Hits	Pop Total	Fold Enrichment	Bonferroni	Benjamini	FDR
INTERPRO	IPR000998:MAM	5	0.637755	0.00555411	ILMN_1698885, ILMN_1684447, ILMN_1699574, ILMN_1810962, ILMN_1753135	689	18	16659	6.71626	0.997639	0.200702	8.50841
SMART	SM00137:MAM	5	0.637755	0.00750783	ILMN_1698885, ILMN_1684447, ILMN_1699574, ILMN_1810962, ILMN_1753135	410	18	9079	6.15108	0.802155	0.183341	9.11505
UP_SEQ_FEATURE	domain:MAM	4	0.510204	0.0141039	ILMN_1698885, ILMN_1684447, ILMN_1699574, ILMN_1810962	778	13	19113	7.55903	1	0.55894	21.6872
Annotation Cluster 31	Enrichment Score: 2.0658929716680614
Category	Term	Count	%	PValue	Genes	List Total	Pop Hits	Pop Total	Fold Enrichment	Bonferroni	Benjamini	FDR
PUBMED_ID	18828811	3	0.382653	0.00466741	ILMN_1718198, ILMN_1731062, ILMN_1799878	783	4	27491	26.3324	1	0.8195	9.39066
PUBMED_ID	17948870	3	0.382653	0.00466741	ILMN_1718198, ILMN_1731062, ILMN_1799878	783	4	27491	26.3324	1	0.8195	9.39066
PUBMED_ID	12007534	3	0.382653	0.00763256	ILMN_1718198, ILMN_1731062, ILMN_1799878	783	5	27491	21.0659	1	0.901353	14.9134
PUBMED_ID	17325259	3	0.382653	0.0112338	ILMN_1718198, ILMN_1731062, ILMN_1799878	783	6	27491	17.5549	1	0.959488	21.1903
GOTERM_BP_FAT	GO:0007631~feeding behavior	8	1.02041	0.0250719	ILMN_1718198, ILMN_1712943, ILMN_1668035, ILMN_1740250, ILMN_1767145, ILMN_1757387, ILMN_1731062, ILMN_1799878	568	69	13528	2.76138	1	0.375579	36.2051
Annotation Cluster 32	Enrichment Score: 1.9433672983915091
Category	Term	Count	%	PValue	Genes	List Total	Pop Hits	Pop Total	Fold Enrichment	Bonferroni	Benjamini	FDR
GOTERM_BP_FAT	GO:0043065~positive regulation of apoptosis	35	4.46429	0.000290602	ILMN_1720282, ILMN_1703006, ILMN_1668035, ILMN_1752750, ILMN_1707798, ILMN_1803423, ILMN_1656826, ILMN_1752247, ILMN_1693014, ILMN_1659106, ILMN_1728650, ILMN_1724863, ILMN_1758939, ILMN_1668830, ILMN_1788184, ILMN_1715637, ILMN_1812824, ILMN_1745817, ILMN_1662358, ILMN_1754375, ILMN_1809613, ILMN_1712943, ILMN_1709101, ILMN_1708340, ILMN_1682738, ILMN_1772686, ILMN_1707077, ILMN_1771800, ILMN_17…	568	430	13528	1.93858	0.527293	0.0143059	0.513196
GOTERM_BP_FAT	GO:0043068~positive regulation of programmed cell death	35	4.46429	0.000330351	ILMN_1720282, ILMN_1703006, ILMN_1668035, ILMN_1752750, ILMN_1707798, ILMN_1803423, ILMN_1656826, ILMN_1752247, ILMN_1693014, ILMN_1659106, ILMN_1728650, ILMN_1724863, ILMN_1758939, ILMN_1668830, ILMN_1788184, ILMN_1715637, ILMN_1812824, ILMN_1745817, ILMN_1662358, ILMN_1754375, ILMN_1809613, ILMN_1712943, ILMN_1709101, ILMN_1708340, ILMN_1682738, ILMN_1772686, ILMN_1707077, ILMN_1771800, ILMN_17…	568	433	13528	1.92515	0.573348	0.015943	0.583199
GOTERM_BP_FAT	GO:0010942~positive regulation of cell death	35	4.46429	0.000358866	ILMN_1720282, ILMN_1703006, ILMN_1668035, ILMN_1752750, ILMN_1707798, ILMN_1803423, ILMN_1656826, ILMN_1752247, ILMN_1693014, ILMN_1659106, ILMN_1728650, ILMN_1724863, ILMN_1758939, ILMN_1668830, ILMN_1788184, ILMN_1715637, ILMN_1812824, ILMN_1745817, ILMN_1662358, ILMN_1754375, ILMN_1809613, ILMN_1712943, ILMN_1709101, ILMN_1708340, ILMN_1682738, ILMN_1772686, ILMN_1707077, ILMN_1771800, ILMN_17…	568	435	13528	1.9163	0.603596	0.0169896	0.633388
GOTERM_BP_FAT	GO:0006917~induction of apoptosis	28	3.57143	0.000445773	ILMN_1668035, ILMN_1752750, ILMN_1803423, ILMN_1707798, ILMN_1656826, ILMN_1752247, ILMN_1693014, ILMN_1659106, ILMN_1728650, ILMN_1724863, ILMN_1668830, ILMN_1788184, ILMN_1715637, ILMN_1812824, ILMN_1745817, ILMN_1662358, ILMN_1809613, ILMN_1709101, ILMN_1708340, ILMN_1682738, ILMN_1772686, ILMN_1707077, ILMN_1771800, ILMN_1749662, ILMN_1712026, ILMN_1780769, ILMN_1680774, ILMN_1666076, ILMN_16…	568	320	13528	2.08398	0.683192	0.019964	0.786206
GOTERM_BP_FAT	GO:0012502~induction of programmed cell death	28	3.57143	0.000468981	ILMN_1668035, ILMN_1752750, ILMN_1803423, ILMN_1707798, ILMN_1656826, ILMN_1752247, ILMN_1693014, ILMN_1659106, ILMN_1728650, ILMN_1724863, ILMN_1668830, ILMN_1788184, ILMN_1715637, ILMN_1812824, ILMN_1745817, ILMN_1662358, ILMN_1809613, ILMN_1709101, ILMN_1708340, ILMN_1682738, ILMN_1772686, ILMN_1707077, ILMN_1771800, ILMN_1749662, ILMN_1712026, ILMN_1780769, ILMN_1680774, ILMN_1666076, ILMN_16…	568	321	13528	2.07749	0.701598	0.0206344	0.826977
GOTERM_BP_FAT	GO:0008219~cell death	45	5.7398	0.0073635	ILMN_1812403, ILMN_1765641, ILMN_1715496, ILMN_1703006, ILMN_1742544, ILMN_1805098, ILMN_1752750, ILMN_1707798, ILMN_1803423, ILMN_1752247, ILMN_1659106, ILMN_1791280, ILMN_1728650, ILMN_1724863, ILMN_1758939, ILMN_1810782, ILMN_1668830, ILMN_1788184, ILMN_1715637, ILMN_1812254, ILMN_1656899, ILMN_1763834, ILMN_1754375, ILMN_1809613, ILMN_1712943, ILMN_1808501, ILMN_1708340, ILMN_1709101, ILMN_17…	568	719	13528	1.49063	1	0.175071	12.2638
GOTERM_BP_FAT	GO:0042981~regulation of apoptosis	49	6.25	0.00814029	ILMN_1720282, ILMN_1665761, ILMN_1703006, ILMN_1798892, ILMN_1766925, ILMN_1659086, ILMN_1803423, ILMN_1656826, ILMN_1752247, ILMN_1693014, ILMN_1659106, ILMN_1734742, ILMN_1724863, ILMN_1728650, ILMN_1758939, ILMN_1758418, ILMN_1745817, ILMN_1718046, ILMN_1662358, ILMN_1809613, ILMN_1712943, ILMN_1682738, ILMN_1654422, ILMN_1771800, ILMN_1712026, ILMN_1723978, ILMN_1780769, ILMN_1680774, ILMN_16…	568	804	13528	1.45153	1	0.186642	13.4713
GOTERM_BP_FAT	GO:0016265~death	45	5.7398	0.0081705	ILMN_1812403, ILMN_1765641, ILMN_1715496, ILMN_1703006, ILMN_1742544, ILMN_1805098, ILMN_1752750, ILMN_1707798, ILMN_1803423, ILMN_1752247, ILMN_1659106, ILMN_1791280, ILMN_1728650, ILMN_1724863, ILMN_1758939, ILMN_1810782, ILMN_1668830, ILMN_1788184, ILMN_1715637, ILMN_1812254, ILMN_1656899, ILMN_1763834, ILMN_1754375, ILMN_1809613, ILMN_1712943, ILMN_1808501, ILMN_1708340, ILMN_1709101, ILMN_17…	568	724	13528	1.48033	1	0.18563	13.518
GOTERM_BP_FAT	GO:0043067~regulation of programmed cell death	49	6.25	0.00966229	ILMN_1720282, ILMN_1665761, ILMN_1703006, ILMN_1798892, ILMN_1766925, ILMN_1659086, ILMN_1803423, ILMN_1656826, ILMN_1752247, ILMN_1693014, ILMN_1659106, ILMN_1734742, ILMN_1724863, ILMN_1728650, ILMN_1758939, ILMN_1758418, ILMN_1745817, ILMN_1718046, ILMN_1662358, ILMN_1809613, ILMN_1712943, ILMN_1682738, ILMN_1654422, ILMN_1771800, ILMN_1712026, ILMN_1723978, ILMN_1780769, ILMN_1680774, ILMN_16…	568	812	13528	1.43723	1	0.201883	15.792
GOTERM_BP_FAT	GO:0010941~regulation of cell death	49	6.25	0.0104828	ILMN_1720282, ILMN_1665761, ILMN_1703006, ILMN_1798892, ILMN_1766925, ILMN_1659086, ILMN_1803423, ILMN_1656826, ILMN_1752247, ILMN_1693014, ILMN_1659106, ILMN_1734742, ILMN_1724863, ILMN_1728650, ILMN_1758939, ILMN_1758418, ILMN_1745817, ILMN_1718046, ILMN_1662358, ILMN_1809613, ILMN_1712943, ILMN_1682738, ILMN_1654422, ILMN_1771800, ILMN_1712026, ILMN_1723978, ILMN_1780769, ILMN_1680774, ILMN_16…	568	815	13528	1.43194	1	0.212041	17.0185
GOTERM_BP_FAT	GO:0006915~apoptosis	37	4.71939	0.0202139	ILMN_1812403, ILMN_1765641, ILMN_1703006, ILMN_1742544, ILMN_1805098, ILMN_1752750, ILMN_1707798, ILMN_1803423, ILMN_1752247, ILMN_1659106, ILMN_1728650, ILMN_1724863, ILMN_1758939, ILMN_1668830, ILMN_1810782, ILMN_1788184, ILMN_1715637, ILMN_1656899, ILMN_1763834, ILMN_1754375, ILMN_1809613, ILMN_1712943, ILMN_1808501, ILMN_1708340, ILMN_1709101, ILMN_1744403, ILMN_1682738, ILMN_1772686, ILMN_16…	568	602	13528	1.46383	1	0.328894	30.3374
GOTERM_BP_FAT	GO:0012501~programmed cell death	37	4.71939	0.0247697	ILMN_1812403, ILMN_1765641, ILMN_1703006, ILMN_1742544, ILMN_1805098, ILMN_1752750, ILMN_1707798, ILMN_1803423, ILMN_1752247, ILMN_1659106, ILMN_1728650, ILMN_1724863, ILMN_1758939, ILMN_1668830, ILMN_1810782, ILMN_1788184, ILMN_1715637, ILMN_1656899, ILMN_1763834, ILMN_1754375, ILMN_1809613, ILMN_1712943, ILMN_1808501, ILMN_1708340, ILMN_1709101, ILMN_1744403, ILMN_1682738, ILMN_1772686, ILMN_16…	568	611	13528	1.44227	1	0.37623	35.8542
SP_PIR_KEYWORDS	Apoptosis	19	2.42347	0.280277	ILMN_1812403, ILMN_1703006, ILMN_1808501, ILMN_1742544, ILMN_1708340, ILMN_1744403, ILMN_1658643, ILMN_1659106, ILMN_1724863, ILMN_1802690, ILMN_1758939, ILMN_1810782, ILMN_1668830, ILMN_1788184, ILMN_1811594, ILMN_1715637, ILMN_1712026, ILMN_1660732, ILMN_1680774, ILMN_1763834	778	381	19235	1.23294	1	0.818512	99.0819
GOTERM_BP_FAT	GO:0043066~negative regulation of apoptosis	18	2.29592	0.317489	ILMN_1665761, ILMN_1742544, ILMN_1766925, ILMN_1784783, ILMN_1708340, ILMN_1659086, ILMN_1682738, ILMN_1693014, ILMN_1707077, ILMN_1734742, ILMN_1758939, ILMN_1749662, ILMN_1668830, ILMN_1788184, ILMN_1758418, ILMN_1703178, ILMN_1672094, ILMN_1718046	568	354	13528	1.21103	1	0.949412	99.8843
GOTERM_BP_FAT	GO:0043069~negative regulation of programmed cell death	18	2.29592	0.338301	ILMN_1665761, ILMN_1742544, ILMN_1766925, ILMN_1784783, ILMN_1708340, ILMN_1659086, ILMN_1682738, ILMN_1693014, ILMN_1707077, ILMN_1734742, ILMN_1758939, ILMN_1749662, ILMN_1668830, ILMN_1788184, ILMN_1758418, ILMN_1703178, ILMN_1672094, ILMN_1718046	568	359	13528	1.19416	1	0.95633	99.9331
GOTERM_BP_FAT	GO:0060548~negative regulation of cell death	18	2.29592	0.342423	ILMN_1665761, ILMN_1742544, ILMN_1766925, ILMN_1784783, ILMN_1708340, ILMN_1659086, ILMN_1682738, ILMN_1693014, ILMN_1707077, ILMN_1734742, ILMN_1758939, ILMN_1749662, ILMN_1668830, ILMN_1788184, ILMN_1758418, ILMN_1703178, ILMN_1672094, ILMN_1718046	568	360	13528	1.19085	1	0.957569	99.9401
GOTERM_BP_FAT	GO:0006916~anti-apoptosis	10	1.27551	0.497737	ILMN_1734742, ILMN_1758939, ILMN_1749662, ILMN_1668830, ILMN_1742544, ILMN_1708340, ILMN_1784783, ILMN_1766925, ILMN_1758418, ILMN_1693014	568	206	13528	1.15616	1	0.985549	99.9995
Annotation Cluster 33	Enrichment Score: 1.8841845510490436
Category	Term	Count	%	PValue	Genes	List Total	Pop Hits	Pop Total	Fold Enrichment	Bonferroni	Benjamini	FDR
GOTERM_BP_FAT	GO:0009719~response to endogenous stimulus	32	4.08163	0.000912726	ILMN_1701603, ILMN_1746027, ILMN_1658835, ILMN_1766925, ILMN_1757497, ILMN_1708275, ILMN_1814719, ILMN_1659086, ILMN_1810691, ILMN_1725193, ILMN_1810559, ILMN_1668411, ILMN_1812824, ILMN_1746359, ILMN_1708588, ILMN_1718046, ILMN_1799878, ILMN_1807925, ILMN_1797384, ILMN_1736042, ILMN_1710859, ILMN_1707077, ILMN_1689043, ILMN_1667081, ILMN_1771800, ILMN_1740508, ILMN_1698554, ILMN_1679754, ILMN_17…	568	405	13528	1.88183	0.905019	0.0345255	1.60351
GOTERM_BP_FAT	GO:0010033~response to organic substance	46	5.86735	0.00484226	ILMN_1701603, ILMN_1746027, ILMN_1743455, ILMN_1658835, ILMN_1766925, ILMN_1757497, ILMN_1720710, ILMN_1708275, ILMN_1659086, ILMN_1814719, ILMN_1810691, ILMN_1725193, ILMN_1671766, ILMN_1724863, ILMN_1810559, ILMN_1758939, ILMN_1668411, ILMN_1812824, ILMN_1746359, ILMN_1712888, ILMN_1708588, ILMN_1682757, ILMN_1693604, ILMN_1718046, ILMN_1799878, ILMN_1754375, ILMN_1797384, ILMN_1807925, ILMN_17…	568	721	13528	1.51952	0.999996	0.132553	8.23407
GOTERM_BP_FAT	GO:0009725~response to hormone stimulus	24	3.06122	0.0358979	ILMN_1701603, ILMN_1658835, ILMN_1807925, ILMN_1757497, ILMN_1708275, ILMN_1736042, ILMN_1814719, ILMN_1659086, ILMN_1810691, ILMN_1725193, ILMN_1710859, ILMN_1707077, ILMN_1771800, ILMN_1667081, ILMN_1810559, ILMN_1740508, ILMN_1668411, ILMN_1812824, ILMN_1746359, ILMN_1708588, ILMN_1790270, ILMN_1733421, ILMN_1718046, ILMN_1799878	568	367	13528	1.55751	1	0.45773	47.6478
GOTERM_BP_FAT	GO:0048545~response to steroid hormone stimulus	12	1.53061	0.183149	ILMN_1771800, ILMN_1667081, ILMN_1701603, ILMN_1658835, ILMN_1740508, ILMN_1812824, ILMN_1708275, ILMN_1659086, ILMN_1718046, ILMN_1725193, ILMN_1710859, ILMN_1799878	568	192	13528	1.48856	1	0.869608	97.2158
Annotation Cluster 34	Enrichment Score: 1.760394000819008
Category	Term	Count	%	PValue	Genes	List Total	Pop Hits	Pop Total	Fold Enrichment	Bonferroni	Benjamini	FDR
UP_SEQ_FEATURE	propeptide:Removed in mature form	22	2.80612	0.00045297	ILMN_1701603, ILMN_1779875, ILMN_1651838, ILMN_1677404, ILMN_1766925, ILMN_1807925, ILMN_1688877, ILMN_1653464, ILMN_1697220, ILMN_1688886, ILMN_1656300, ILMN_1707077, ILMN_1788813, ILMN_1810559, ILMN_1717599, ILMN_1739235, ILMN_1684447, ILMN_1813289, ILMN_1789502, ILMN_1676358, ILMN_1738266, ILMN_1759513	778	229	19113	2.36013	0.599021	0.0733265	0.776715
GOTERM_CC_FAT	GO:0031225~anchored to membrane	17	2.16837	0.04276	ILMN_1701603, ILMN_1779875, ILMN_1733045, ILMN_1766925, ILMN_1800787, ILMN_1744403, ILMN_1653464, ILMN_1697220, ILMN_1688886, ILMN_1656300, ILMN_1810559, ILMN_1717599, ILMN_1684447, ILMN_1739235, ILMN_1752299, ILMN_1789502, ILMN_1656899	581	220	12782	1.7	1	0.306407	45.1295
UP_SEQ_FEATURE	lipid moiety-binding region:GPI-anchor amidated serine	6	0.765306	0.0676586	ILMN_1701603, ILMN_1717599, ILMN_1739235, ILMN_1789502, ILMN_1697220, ILMN_1656300	778	54	19113	2.72965	1	0.890065	70.0512
SP_PIR_KEYWORDS	gpi-anchor	10	1.27551	0.0693416	ILMN_1701603, ILMN_1717599, ILMN_1779875, ILMN_1739235, ILMN_1684447, ILMN_1766925, ILMN_1789502, ILMN_1697220, ILMN_1688886, ILMN_1656300	778	126	19235	1.96219	1	0.444992	64.1174
Annotation Cluster 35	Enrichment Score: 1.7274190897540946
Category	Term	Count	%	PValue	Genes	List Total	Pop Hits	Pop Total	Fold Enrichment	Bonferroni	Benjamini	FDR
GOTERM_BP_FAT	GO:0051496~positive regulation of stress fiber formation	5	0.637755	0.00115477	ILMN_1792409, ILMN_1790270, ILMN_1682738, ILMN_1673521, ILMN_1733421	568	12	13528	9.92371	0.949142	0.0416604	2.02466
GOTERM_BP_FAT	GO:0051130~positive regulation of cellular component organization	18	2.29592	0.00158503	ILMN_1658835, ILMN_1712943, ILMN_1792409, ILMN_1776708, ILMN_1769891, ILMN_1735151, ILMN_1659086, ILMN_1682738, ILMN_1673521, ILMN_1735735, ILMN_1671843, ILMN_1734742, ILMN_1771800, ILMN_1771622, ILMN_1810559, ILMN_1676449, ILMN_1790270, ILMN_1733421	568	181	13528	2.36853	0.983252	0.0530661	2.76909
GOTERM_BP_FAT	GO:0032233~positive regulation of actin filament bundle formation	5	0.637755	0.00218406	ILMN_1792409, ILMN_1790270, ILMN_1682738, ILMN_1673521, ILMN_1733421	568	14	13528	8.50604	0.996435	0.0672224	3.79665
GOTERM_BP_FAT	GO:0051495~positive regulation of cytoskeleton organization	8	1.02041	0.0024851	ILMN_1658835, ILMN_1792409, ILMN_1790270, ILMN_1682738, ILMN_1673521, ILMN_1733421, ILMN_1735735, ILMN_1671843	568	45	13528	4.23412	0.998362	0.0735209	4.30916
GOTERM_BP_FAT	GO:0051492~regulation of stress fiber formation	5	0.637755	0.00716067	ILMN_1792409, ILMN_1790270, ILMN_1682738, ILMN_1673521, ILMN_1733421	568	19	13528	6.26761	1	0.172252	11.9459
GOTERM_BP_FAT	GO:0032231~regulation of actin filament bundle formation	5	0.637755	0.0103488	ILMN_1792409, ILMN_1790270, ILMN_1682738, ILMN_1673521, ILMN_1733421	568	21	13528	5.67069	1	0.211268	16.8193
GOTERM_BP_FAT	GO:0051493~regulation of cytoskeleton organization	13	1.65816	0.0118349	ILMN_1658835, ILMN_1792409, ILMN_1772366, ILMN_1673521, ILMN_1682738, ILMN_1812392, ILMN_1735735, ILMN_1671686, ILMN_1671843, ILMN_1810559, ILMN_1681777, ILMN_1790270, ILMN_1733421	568	136	13528	2.27662	1	0.229028	19.003
GOTERM_BP_FAT	GO:0044087~regulation of cellular component biogenesis	13	1.65816	0.0162312	ILMN_1658835, ILMN_1792409, ILMN_1712943, ILMN_1673521, ILMN_1682738, ILMN_1812392, ILMN_1671686, ILMN_1770454, ILMN_1671843, ILMN_1771800, ILMN_1810559, ILMN_1790270, ILMN_1733421	568	142	13528	2.18042	1	0.288386	25.1506
GOTERM_BP_FAT	GO:0032956~regulation of actin cytoskeleton organization	9	1.14796	0.0328751	ILMN_1810559, ILMN_1792409, ILMN_1681777, ILMN_1790270, ILMN_1682738, ILMN_1673521, ILMN_1733421, ILMN_1812392, ILMN_1671686	568	89	13528	2.40845	1	0.437019	44.6647
GOTERM_BP_FAT	GO:0032970~regulation of actin filament-based process	9	1.14796	0.0389278	ILMN_1810559, ILMN_1792409, ILMN_1681777, ILMN_1790270, ILMN_1682738, ILMN_1673521, ILMN_1733421, ILMN_1812392, ILMN_1671686	568	92	13528	2.32991	1	0.474698	50.4852
GOTERM_BP_FAT	GO:0010638~positive regulation of organelle organization	8	1.02041	0.0589959	ILMN_1658835, ILMN_1792409, ILMN_1790270, ILMN_1682738, ILMN_1673521, ILMN_1733421, ILMN_1735735, ILMN_1671843	568	83	13528	2.2956	1	0.577401	65.92
GOTERM_BP_FAT	GO:0033043~regulation of organelle organization	13	1.65816	0.200656	ILMN_1658835, ILMN_1792409, ILMN_1772366, ILMN_1673521, ILMN_1682738, ILMN_1812392, ILMN_1735735, ILMN_1671686, ILMN_1671843, ILMN_1810559, ILMN_1681777, ILMN_1790270, ILMN_1733421	568	217	13528	1.42682	1	0.883094	98.1027
GOTERM_BP_FAT	GO:0030335~positive regulation of cell migration	5	0.637755	0.515874	ILMN_1792409, ILMN_1766925, ILMN_1790270, ILMN_1682738, ILMN_1692664	568	89	13528	1.33803	1	0.987598	99.9997
GOTERM_BP_FAT	GO:0051272~positive regulation of cell motion	5	0.637755	0.592506	ILMN_1792409, ILMN_1766925, ILMN_1790270, ILMN_1682738, ILMN_1692664	568	98	13528	1.21515	1	0.993032	100
Annotation Cluster 36	Enrichment Score: 1.7155602362966502
Category	Term	Count	%	PValue	Genes	List Total	Pop Hits	Pop Total	Fold Enrichment	Bonferroni	Benjamini	FDR
GOTERM_BP_FAT	GO:0030799~regulation of cyclic nucleotide metabolic process	14	1.78571	0.000883852	ILMN_1763344, ILMN_1808590, ILMN_1746027, ILMN_1797604, ILMN_1670054, ILMN_1810691, ILMN_1689043, ILMN_1691237, ILMN_1793360, ILMN_1708588, ILMN_1693604, ILMN_1729212, ILMN_1733259, ILMN_1799878	568	113	13528	2.95077	0.897673	0.0344626	1.55316
GOTERM_BP_FAT	GO:0006140~regulation of nucleotide metabolic process	14	1.78571	0.00113016	ILMN_1763344, ILMN_1808590, ILMN_1746027, ILMN_1797604, ILMN_1670054, ILMN_1810691, ILMN_1689043, ILMN_1691237, ILMN_1793360, ILMN_1708588, ILMN_1693604, ILMN_1729212, ILMN_1733259, ILMN_1799878	568	116	13528	2.87445	0.945806	0.0413691	1.98191
GOTERM_BP_FAT	GO:0030814~regulation of cAMP metabolic process	13	1.65816	0.00123389	ILMN_1763344, ILMN_1746027, ILMN_1797604, ILMN_1670054, ILMN_1810691, ILMN_1689043, ILMN_1691237, ILMN_1793360, ILMN_1708588, ILMN_1693604, ILMN_1729212, ILMN_1733259, ILMN_1799878	568	103	13528	3.00602	0.958536	0.0426649	2.16195
GOTERM_BP_FAT	GO:0030802~regulation of cyclic nucleotide biosynthetic process	13	1.65816	0.00217877	ILMN_1763344, ILMN_1808590, ILMN_1746027, ILMN_1797604, ILMN_1810691, ILMN_1689043, ILMN_1691237, ILMN_1793360, ILMN_1708588, ILMN_1693604, ILMN_1729212, ILMN_1733259, ILMN_1799878	568	110	13528	2.81472	0.996386	0.0678743	3.78763
GOTERM_BP_FAT	GO:0030808~regulation of nucleotide biosynthetic process	13	1.65816	0.00217877	ILMN_1763344, ILMN_1808590, ILMN_1746027, ILMN_1797604, ILMN_1810691, ILMN_1689043, ILMN_1691237, ILMN_1793360, ILMN_1708588, ILMN_1693604, ILMN_1729212, ILMN_1733259, ILMN_1799878	568	110	13528	2.81472	0.996386	0.0678743	3.78763
GOTERM_BP_FAT	GO:0045761~regulation of adenylate cyclase activity	12	1.53061	0.00222425	ILMN_1763344, ILMN_1746027, ILMN_1691237, ILMN_1793360, ILMN_1797604, ILMN_1708588, ILMN_1810691, ILMN_1693604, ILMN_1729212, ILMN_1799878, ILMN_1733259, ILMN_1689043	568	96	13528	2.97711	0.996787	0.0676119	3.86522
GOTERM_BP_FAT	GO:0031279~regulation of cyclase activity	12	1.53061	0.00284105	ILMN_1763344, ILMN_1746027, ILMN_1691237, ILMN_1793360, ILMN_1797604, ILMN_1708588, ILMN_1810691, ILMN_1693604, ILMN_1729212, ILMN_1799878, ILMN_1733259, ILMN_1689043	568	99	13528	2.8869	0.999347	0.0826718	4.91184
GOTERM_BP_FAT	GO:0051339~regulation of lyase activity	12	1.53061	0.00332385	ILMN_1763344, ILMN_1746027, ILMN_1691237, ILMN_1793360, ILMN_1797604, ILMN_1708588, ILMN_1810691, ILMN_1693604, ILMN_1729212, ILMN_1799878, ILMN_1733259, ILMN_1689043	568	101	13528	2.82973	0.999813	0.0939465	5.72357
GOTERM_BP_FAT	GO:0030817~regulation of cAMP biosynthetic process	12	1.53061	0.00332385	ILMN_1763344, ILMN_1746027, ILMN_1691237, ILMN_1793360, ILMN_1797604, ILMN_1708588, ILMN_1810691, ILMN_1693604, ILMN_1729212, ILMN_1799878, ILMN_1733259, ILMN_1689043	568	101	13528	2.82973	0.999813	0.0939465	5.72357
GOTERM_BP_FAT	GO:0007190~activation of adenylate cyclase activity	8	1.02041	0.00775962	ILMN_1763344, ILMN_1746027, ILMN_1691237, ILMN_1797604, ILMN_1708588, ILMN_1810691, ILMN_1733259, ILMN_1689043	568	55	13528	3.46428	1	0.181943	12.8816
GOTERM_BP_FAT	GO:0045762~positive regulation of adenylate cyclase activity	8	1.02041	0.00855658	ILMN_1763344, ILMN_1746027, ILMN_1691237, ILMN_1797604, ILMN_1708588, ILMN_1810691, ILMN_1733259, ILMN_1689043	568	56	13528	3.40241	1	0.190217	14.112
GOTERM_BP_FAT	GO:0031281~positive regulation of cyclase activity	8	1.02041	0.00941208	ILMN_1763344, ILMN_1746027, ILMN_1691237, ILMN_1797604, ILMN_1708588, ILMN_1810691, ILMN_1733259, ILMN_1689043	568	57	13528	3.34272	1	0.198788	15.4146
GOTERM_BP_FAT	GO:0051349~positive regulation of lyase activity	8	1.02041	0.0113081	ILMN_1763344, ILMN_1746027, ILMN_1691237, ILMN_1797604, ILMN_1708588, ILMN_1810691, ILMN_1733259, ILMN_1689043	568	59	13528	3.22941	1	0.225039	18.2353
GOTERM_BP_FAT	GO:0007187~G-protein signaling, coupled to cyclic nucleotide second messenger	11	1.40306	0.0225116	ILMN_1673998, ILMN_1791726, ILMN_1746027, ILMN_1793360, ILMN_1808258, ILMN_1708588, ILMN_1679754, ILMN_1810691, ILMN_1731062, ILMN_1799878, ILMN_1689043	568	115	13528	2.27814	1	0.354703	33.1734
GOTERM_BP_FAT	GO:0007194~negative regulation of adenylate cyclase activity	7	0.892857	0.0268994	ILMN_1746027, ILMN_1793360, ILMN_1708588, ILMN_1810691, ILMN_1693604, ILMN_1729212, ILMN_1799878	568	55	13528	3.03124	1	0.394753	38.2894
GOTERM_BP_FAT	GO:0051350~negative regulation of lyase activity	7	0.892857	0.0268994	ILMN_1746027, ILMN_1793360, ILMN_1708588, ILMN_1810691, ILMN_1693604, ILMN_1729212, ILMN_1799878	568	55	13528	3.03124	1	0.394753	38.2894
GOTERM_BP_FAT	GO:0031280~negative regulation of cyclase activity	7	0.892857	0.0268994	ILMN_1746027, ILMN_1793360, ILMN_1708588, ILMN_1810691, ILMN_1693604, ILMN_1729212, ILMN_1799878	568	55	13528	3.03124	1	0.394753	38.2894
GOTERM_BP_FAT	GO:0019935~cyclic-nucleotide-mediated signaling	11	1.40306	0.0465479	ILMN_1673998, ILMN_1791726, ILMN_1746027, ILMN_1793360, ILMN_1808258, ILMN_1708588, ILMN_1679754, ILMN_1810691, ILMN_1731062, ILMN_1799878, ILMN_1689043	568	130	13528	2.01528	1	0.514629	56.9934
GOTERM_MF_FAT	GO:0016849~phosphorus-oxygen lyase activity	4	0.510204	0.0660315	ILMN_1808590, ILMN_1746027, ILMN_1708588, ILMN_1810691	558	22	12983	4.23037	1	0.690095	64.9933
GOTERM_MF_FAT	GO:0009975~cyclase activity	4	0.510204	0.0736114	ILMN_1808590, ILMN_1746027, ILMN_1708588, ILMN_1810691	558	23	12983	4.04644	1	0.715696	69.1131
GOTERM_BP_FAT	GO:0007193~inhibition of adenylate cyclase activity by G-protein signaling	5	0.637755	0.0852069	ILMN_1746027, ILMN_1793360, ILMN_1708588, ILMN_1810691, ILMN_1799878	568	40	13528	2.97711	1	0.664886	79.3314
GOTERM_MF_FAT	GO:0004016~adenylate cyclase activity	3	0.382653	0.0912584	ILMN_1746027, ILMN_1708588, ILMN_1810691	558	12	12983	5.81676	1	0.753984	77.0157
GOTERM_BP_FAT	GO:0043086~negative regulation of catalytic activity	17	2.16837	0.120892	ILMN_1720282, ILMN_1746027, ILMN_1779875, ILMN_1810691, ILMN_1653894, ILMN_1671809, ILMN_1689043, ILMN_1707077, ILMN_1758067, ILMN_1771800, ILMN_1664071, ILMN_1793360, ILMN_1749662, ILMN_1708588, ILMN_1693604, ILMN_1729212, ILMN_1799878	568	277	13528	1.46169	1	0.76407	89.7813
GOTERM_BP_FAT	GO:0007188~G-protein signaling, coupled to cAMP nucleotide second messenger	7	0.892857	0.14591	ILMN_1746027, ILMN_1793360, ILMN_1708588, ILMN_1679754, ILMN_1810691, ILMN_1799878, ILMN_1689043	568	85	13528	1.96139	1	0.813656	93.8704
GOTERM_BP_FAT	GO:0044092~negative regulation of molecular function	19	2.42347	0.168314	ILMN_1720282, ILMN_1746027, ILMN_1779875, ILMN_1810691, ILMN_1653894, ILMN_1671809, ILMN_1689043, ILMN_1707077, ILMN_1758067, ILMN_1771800, ILMN_1664071, ILMN_1793360, ILMN_1749662, ILMN_1807981, ILMN_1712026, ILMN_1708588, ILMN_1693604, ILMN_1729212, ILMN_1799878	568	334	13528	1.35485	1	0.850507	96.1712
GOTERM_BP_FAT	GO:0019933~cAMP-mediated signaling	7	0.892857	0.207983	ILMN_1746027, ILMN_1793360, ILMN_1708588, ILMN_1679754, ILMN_1810691, ILMN_1799878, ILMN_1689043	568	95	13528	1.75493	1	0.887621	98.3881
GOTERM_BP_FAT	GO:0007189~activation of adenylate cyclase activity by G-protein signaling pathway	4	0.510204	0.23456	ILMN_1746027, ILMN_1708588, ILMN_1810691, ILMN_1689043	568	40	13528	2.38169	1	0.907862	99.1191
GOTERM_BP_FAT	GO:0010579~positive regulation of adenylate cyclase activity by G-protein signaling pathway	4	0.510204	0.23456	ILMN_1746027, ILMN_1708588, ILMN_1810691, ILMN_1689043	568	40	13528	2.38169	1	0.907862	99.1191
GOTERM_BP_FAT	GO:0010578~regulation of adenylate cyclase activity involved in G-protein signaling	4	0.510204	0.23456	ILMN_1746027, ILMN_1708588, ILMN_1810691, ILMN_1689043	568	40	13528	2.38169	1	0.907862	99.1191
Annotation Cluster 37	Enrichment Score: 1.6735399598468057
Category	Term	Count	%	PValue	Genes	List Total	Pop Hits	Pop Total	Fold Enrichment	Bonferroni	Benjamini	FDR
GOTERM_CC_FAT	GO:0005912~adherens junction	18	2.29592	0.000666683	ILMN_1658835, ILMN_1651838, ILMN_1798892, ILMN_1808501, ILMN_1776708, ILMN_1700042, ILMN_1796901, ILMN_1810962, ILMN_1801833, ILMN_1810593, ILMN_1712075, ILMN_1796925, ILMN_1727633, ILMN_1654422, ILMN_1810782, ILMN_1668411, ILMN_1681777, ILMN_1765876, ILMN_1775441, ILMN_1723521, ILMN_1669714	581	155	12782	2.55484	0.21344	0.0170028	0.911749
GOTERM_CC_FAT	GO:0070161~anchoring junction	18	2.29592	0.00210929	ILMN_1658835, ILMN_1651838, ILMN_1798892, ILMN_1808501, ILMN_1776708, ILMN_1700042, ILMN_1796901, ILMN_1810962, ILMN_1801833, ILMN_1810593, ILMN_1712075, ILMN_1796925, ILMN_1727633, ILMN_1654422, ILMN_1810782, ILMN_1668411, ILMN_1681777, ILMN_1765876, ILMN_1775441, ILMN_1723521, ILMN_1669714	581	172	12782	2.30233	0.532402	0.0413511	2.85833
GOTERM_CC_FAT	GO:0005925~focal adhesion	10	1.27551	0.0418925	ILMN_1658835, ILMN_1798892, ILMN_1808501, ILMN_1700042, ILMN_1776708, ILMN_1810593, ILMN_1801833, ILMN_1654422, ILMN_1810782, ILMN_1668411, ILMN_1765876, ILMN_1669714, ILMN_1775441	581	102	12782	2.15686	1	0.307063	44.4426
GOTERM_CC_FAT	GO:0005924~cell-substrate adherens junction	10	1.27551	0.051383	ILMN_1658835, ILMN_1798892, ILMN_1808501, ILMN_1700042, ILMN_1776708, ILMN_1810593, ILMN_1801833, ILMN_1654422, ILMN_1810782, ILMN_1668411, ILMN_1765876, ILMN_1669714, ILMN_1775441	581	106	12782	2.07547	1	0.338224	51.5421
GOTERM_CC_FAT	GO:0030055~cell-substrate junction	10	1.27551	0.0680904	ILMN_1658835, ILMN_1798892, ILMN_1808501, ILMN_1700042, ILMN_1776708, ILMN_1810593, ILMN_1801833, ILMN_1654422, ILMN_1810782, ILMN_1668411, ILMN_1765876, ILMN_1669714, ILMN_1775441	581	112	12782	1.96429	1	0.410745	62.0355
GOTERM_CC_FAT	GO:0016323~basolateral plasma membrane	11	1.40306	0.441227	ILMN_1658835, ILMN_1798892, ILMN_1808501, ILMN_1796901, ILMN_1700042, ILMN_1776708, ILMN_1810593, ILMN_1801833, ILMN_1654422, ILMN_1810782, ILMN_1668411, ILMN_1765876, ILMN_1775441, ILMN_1669714	581	203	12782	1.19212	1	0.8718	99.9662
Annotation Cluster 38	Enrichment Score: 1.6689989628524218
Category	Term	Count	%	PValue	Genes	List Total	Pop Hits	Pop Total	Fold Enrichment	Bonferroni	Benjamini	FDR
GOTERM_BP_FAT	GO:0050768~negative regulation of neurogenesis	9	1.14796	0.000495408	ILMN_1765641, ILMN_1734742, ILMN_1672660, ILMN_1779875, ILMN_1739235, ILMN_1699574, ILMN_1672094, ILMN_1756755, ILMN_1736096	568	45	13528	4.76338	0.721261	0.0210662	0.873385
GOTERM_BP_FAT	GO:0010721~negative regulation of cell development	9	1.14796	0.000776707	ILMN_1765641, ILMN_1734742, ILMN_1672660, ILMN_1779875, ILMN_1739235, ILMN_1699574, ILMN_1672094, ILMN_1756755, ILMN_1736096	568	48	13528	4.46567	0.865087	0.0308141	1.3661
GOTERM_BP_FAT	GO:0014014~negative regulation of gliogenesis	3	0.382653	0.0750821	ILMN_1672094, ILMN_1756755, ILMN_1736096	568	11	13528	6.49552	1	0.632511	74.8848
GOTERM_BP_FAT	GO:0045686~negative regulation of glial cell differentiation	3	0.382653	0.0750821	ILMN_1672094, ILMN_1756755, ILMN_1736096	568	11	13528	6.49552	1	0.632511	74.8848
GOTERM_BP_FAT	GO:0045685~regulation of glial cell differentiation	3	0.382653	0.203631	ILMN_1672094, ILMN_1756755, ILMN_1736096	568	20	13528	3.57254	1	0.885367	98.2239
GOTERM_BP_FAT	GO:0014013~regulation of gliogenesis	3	0.382653	0.219215	ILMN_1672094, ILMN_1756755, ILMN_1736096	568	21	13528	3.40241	1	0.895878	98.7482
Annotation Cluster 39	Enrichment Score: 1.615607524636432
Category	Term	Count	%	PValue	Genes	List Total	Pop Hits	Pop Total	Fold Enrichment	Bonferroni	Benjamini	FDR
PUBMED_ID	18483556	3	0.382653	0.0154327	ILMN_1791726, ILMN_1675391, ILMN_1746116	783	7	27491	15.0471	1	0.98438	27.9519
OMIM_DISEASE	Genetic determinants of hair, eye and skin pigmentation in Europeans	3	0.382653	0.0267366	ILMN_1791726, ILMN_1675391, ILMN_1746116	141	7	3671	11.1581	0.998331	0.959151	29.4514
OMIM_DISEASE	A Genome-Wide Association Study Identifies Novel Alleles Associated with Hair Color and Skin Pigmentation	3	0.382653	0.0267366	ILMN_1791726, ILMN_1675391, ILMN_1746116	141	7	3671	11.1581	0.998331	0.959151	29.4514
PUBMED_ID	17952075	3	0.382653	0.0312547	ILMN_1791726, ILMN_1675391, ILMN_1746116	783	10	27491	10.533	1	0.998487	48.7944
Annotation Cluster 40	Enrichment Score: 1.5995687849384277
Category	Term	Count	%	PValue	Genes	List Total	Pop Hits	Pop Total	Fold Enrichment	Bonferroni	Benjamini	FDR
PUBMED_ID	11499680	3	0.382653	0.00466741	ILMN_1680251, ILMN_1695935, ILMN_1665492, ILMN_1707077	783	4	27491	26.3324	1	0.8195	9.39066
INTERPRO	IPR006581:VPS10	3	0.382653	0.0156722	ILMN_1680251, ILMN_1695935, ILMN_1665492, ILMN_1707077	689	5	16659	14.5071	1	0.37906	22.2911
SMART	SM00602:VPS10	3	0.382653	0.0184913	ILMN_1680251, ILMN_1695935, ILMN_1665492, ILMN_1707077	410	5	9079	13.2863	0.981918	0.249212	21.0777
UP_SEQ_FEATURE	repeat:BNR 5	3	0.382653	0.0222012	ILMN_1680251, ILMN_1695935, ILMN_1665492, ILMN_1707077	778	6	19113	12.2834	1	0.659793	32.0497
UP_SEQ_FEATURE	repeat:BNR 4	3	0.382653	0.0302531	ILMN_1680251, ILMN_1695935, ILMN_1665492, ILMN_1707077	778	7	19113	10.5286	1	0.732424	41.0629
UP_SEQ_FEATURE	repeat:BNR 3	3	0.382653	0.0491483	ILMN_1680251, ILMN_1695935, ILMN_1665492, ILMN_1707077	778	9	19113	8.18895	1	0.826678	57.9935
UP_SEQ_FEATURE	repeat:BNR 1	3	0.382653	0.0598151	ILMN_1680251, ILMN_1695935, ILMN_1665492, ILMN_1707077	778	10	19113	7.37005	1	0.865548	65.4065
UP_SEQ_FEATURE	repeat:BNR 2	3	0.382653	0.0598151	ILMN_1680251, ILMN_1695935, ILMN_1665492, ILMN_1707077	778	10	19113	7.37005	1	0.865548	65.4065
Annotation Cluster 41	Enrichment Score: 1.5838980397233116
Category	Term	Count	%	PValue	Genes	List Total	Pop Hits	Pop Total	Fold Enrichment	Bonferroni	Benjamini	FDR
INTERPRO	IPR006210:EGF-like	20	2.55102	0.000683196	ILMN_1658356, ILMN_1708275, ILMN_1709750, ILMN_1756959, ILMN_1690223, ILMN_1711208, ILMN_1730645, ILMN_1774945, ILMN_1671318, ILMN_1770454, ILMN_1671766, ILMN_1736078, ILMN_1736096, ILMN_1675266, ILMN_1786966, ILMN_1745817, ILMN_1665219, ILMN_1676449, ILMN_1806667, ILMN_1778844, ILMN_1669898	689	201	16659	2.40582	0.523937	0.0453283	1.08522
INTERPRO	IPR000742:EGF-like, type 3	19	2.42347	0.00115899	ILMN_1658356, ILMN_1708275, ILMN_1709750, ILMN_1756959, ILMN_1690223, ILMN_1711208, ILMN_1730645, ILMN_1774945, ILMN_1770454, ILMN_1671766, ILMN_1736078, ILMN_1736096, ILMN_1675266, ILMN_1786966, ILMN_1745817, ILMN_1676449, ILMN_1665219, ILMN_1755158, ILMN_1669898	689	194	16659	2.368	0.716172	0.0714041	1.83445
SMART	SM00181:EGF	20	2.55102	0.00177382	ILMN_1658356, ILMN_1708275, ILMN_1709750, ILMN_1756959, ILMN_1690223, ILMN_1711208, ILMN_1730645, ILMN_1774945, ILMN_1671318, ILMN_1770454, ILMN_1671766, ILMN_1736078, ILMN_1736096, ILMN_1675266, ILMN_1786966, ILMN_1745817, ILMN_1665219, ILMN_1676449, ILMN_1806667, ILMN_1778844, ILMN_1669898	410	201	9079	2.20337	0.317307	0.061637	2.22645
INTERPRO	IPR013032:EGF-like region, conserved site	23	2.93367	0.00518731	ILMN_1658356, ILMN_1688500, ILMN_1708275, ILMN_1709750, ILMN_1756959, ILMN_1715458, ILMN_1690223, ILMN_1711208, ILMN_1730645, ILMN_1774945, ILMN_1770454, ILMN_1671766, ILMN_1736078, ILMN_1736096, ILMN_1675266, ILMN_1699692, ILMN_1786966, ILMN_1745817, ILMN_1676449, ILMN_1665219, ILMN_1755158, ILMN_1669898, ILMN_1663263, ILMN_1668022	689	293	16659	1.89797	0.996476	0.195258	7.96812
SP_PIR_KEYWORDS	egf-like domain	19	2.42347	0.00575996	ILMN_1658356, ILMN_1708275, ILMN_1709750, ILMN_1756959, ILMN_1690223, ILMN_1711208, ILMN_1730645, ILMN_1774945, ILMN_1770454, ILMN_1671766, ILMN_1736078, ILMN_1736096, ILMN_1675266, ILMN_1786966, ILMN_1745817, ILMN_1676449, ILMN_1665219, ILMN_1755158, ILMN_1669898	778	230	19235	2.04239	0.932638	0.0762774	7.90842
INTERPRO	IPR006209:EGF	13	1.65816	0.00632187	ILMN_1658356, ILMN_1708275, ILMN_1756959, ILMN_1690223, ILMN_1711208, ILMN_1774945, ILMN_1730645, ILMN_1671766, ILMN_1770454, ILMN_1736096, ILMN_1665219, ILMN_1676449, ILMN_1755158	689	127	16659	2.47497	0.998979	0.211399	9.62967
UP_SEQ_FEATURE	domain:EGF-like 1	12	1.53061	0.00975599	ILMN_1786966, ILMN_1709750, ILMN_1745817, ILMN_1676449, ILMN_1665219, ILMN_1756959, ILMN_1690223, ILMN_1669898, ILMN_1770454, ILMN_1671766, ILMN_1736078, ILMN_1736096	778	120	19113	2.45668	1	0.450763	15.526
UP_SEQ_FEATURE	domain:EGF-like 2; calcium-binding	7	0.892857	0.0276885	ILMN_1709750, ILMN_1745817, ILMN_1665219, ILMN_1755158, ILMN_1711208, ILMN_1669898, ILMN_1736078	778	57	19113	3.01698	1	0.715938	38.3222
INTERPRO	IPR001881:EGF-like calcium-binding	9	1.14796	0.0448863	ILMN_1709750, ILMN_1745817, ILMN_1676449, ILMN_1665219, ILMN_1756959, ILMN_1755158, ILMN_1711208, ILMN_1669898, ILMN_1736078	689	96	16659	2.26674	1	0.64621	51.9644
SMART	SM00179:EGF_CA	9	1.14796	0.0672351	ILMN_1709750, ILMN_1745817, ILMN_1676449, ILMN_1665219, ILMN_1756959, ILMN_1755158, ILMN_1711208, ILMN_1669898, ILMN_1736078	410	96	9079	2.07599	1	0.509629	58.6341
INTERPRO	IPR018097:EGF-like calcium-binding, conserved site	8	1.02041	0.102001	ILMN_1709750, ILMN_1745817, ILMN_1676449, ILMN_1665219, ILMN_1756959, ILMN_1755158, ILMN_1669898, ILMN_1736078	689	96	16659	2.01488	1	0.811589	82.0523
UP_SEQ_FEATURE	domain:EGF-like 2	7	0.892857	0.148251	ILMN_1786966, ILMN_1676449, ILMN_1756959, ILMN_1690223, ILMN_1770454, ILMN_1671766, ILMN_1736096	778	88	19113	1.95418	1	0.982502	93.681
INTERPRO	IPR013091:EGF calcium-binding	6	0.765306	0.176254	ILMN_1709750, ILMN_1745817, ILMN_1665219, ILMN_1755158, ILMN_1669898, ILMN_1736078	689	72	16659	2.01488	1	0.913573	95.4754
UP_SEQ_FEATURE	domain:EGF-like 5; calcium-binding	4	0.510204	0.189406	ILMN_1745817, ILMN_1676449, ILMN_1665219, ILMN_1711208	778	37	19113	2.65587	1	0.99096	97.3054
UP_SEQ_FEATURE	domain:EGF-like 3; calcium-binding	4	0.510204	0.189406	ILMN_1709750, ILMN_1676449, ILMN_1711208, ILMN_1736078	778	37	19113	2.65587	1	0.99096	97.3054
INTERPRO	IPR000152:EGF-type aspartate/asparagine hydroxylation conserved site	7	0.892857	0.21199	ILMN_1709750, ILMN_1745817, ILMN_1676449, ILMN_1665219, ILMN_1756959, ILMN_1711208, ILMN_1669898	689	97	16659	1.74484	1	0.941763	97.7713
UP_SEQ_FEATURE	domain:EGF-like 6; calcium-binding	3	0.382653	0.270314	ILMN_1745817, ILMN_1665219, ILMN_1711208	778	25	19113	2.94802	1	0.997513	99.5589
Annotation Cluster 42	Enrichment Score: 1.5120006584934078
Category	Term	Count	%	PValue	Genes	List Total	Pop Hits	Pop Total	Fold Enrichment	Bonferroni	Benjamini	FDR
PUBMED_ID	12486117	3	0.382653	0.00466741	ILMN_1771800, ILMN_1666445, ILMN_1809695	783	4	27491	26.3324	1	0.8195	9.39066
KEGG_PATHWAY	hsa04310:Wnt signaling pathway	15	1.91327	0.00478347	ILMN_1741356, ILMN_1731206, ILMN_1779401, ILMN_1806908, ILMN_1724066, ILMN_1682738, ILMN_1771800, ILMN_1667081, ILMN_1772814, ILMN_1666445, ILMN_1748281, ILMN_1712283, ILMN_1683148, ILMN_1716563, ILMN_1809695, ILMN_1723969	218	151	5085	2.31712	0.505821	0.161562	5.54621
KEGG_PATHWAY	hsa04916:Melanogenesis	11	1.40306	0.00911628	ILMN_1791726, ILMN_1771800, ILMN_1699692, ILMN_1666445, ILMN_1712283, ILMN_1806908, ILMN_1708588, ILMN_1724066, ILMN_1810691, ILMN_1716563, ILMN_1809695, ILMN_1723969	218	99	5085	2.59174	0.739783	0.200983	10.3252
PUBMED_ID	8940188	3	0.382653	0.0112338	ILMN_1771800, ILMN_1666445, ILMN_1806908, ILMN_1716563	783	6	27491	17.5549	1	0.959488	21.1903
PUBMED_ID	11306676	3	0.382653	0.0112338	ILMN_1771800, ILMN_1666445, ILMN_1806908, ILMN_1716563	783	6	27491	17.5549	1	0.959488	21.1903
PUBMED_ID	9677319	3	0.382653	0.0112338	ILMN_1771800, ILMN_1806908, ILMN_1716563, ILMN_1809695	783	6	27491	17.5549	1	0.959488	21.1903
PUBMED_ID	7876254	3	0.382653	0.0112338	ILMN_1771800, ILMN_1806908, ILMN_1716563, ILMN_1809695	783	6	27491	17.5549	1	0.959488	21.1903
PUBMED_ID	12147342	3	0.382653	0.0154327	ILMN_1771800, ILMN_1666445, ILMN_1806908, ILMN_1716563	783	7	27491	15.0471	1	0.98438	27.9519
KEGG_PATHWAY	hsa04912:GnRH signaling pathway	9	1.14796	0.0567581	ILMN_1771800, ILMN_1748281, ILMN_1666445, ILMN_1806908, ILMN_1708588, ILMN_1724066, ILMN_1810691, ILMN_1716563, ILMN_1809695, ILMN_1723969	218	98	5085	2.14216	0.999814	0.614956	50.1096
KEGG_PATHWAY	hsa04720:Long-term potentiation	7	0.892857	0.0687109	ILMN_1771800, ILMN_1779401, ILMN_1666445, ILMN_1806908, ILMN_1724066, ILMN_1716563, ILMN_1809695, ILMN_1723969	218	68	5085	2.40117	0.999971	0.64881	57.1344
KEGG_PATHWAY	hsa04012:ErbB signaling pathway	8	1.02041	0.0767471	ILMN_1771800, ILMN_1798029, ILMN_1748281, ILMN_1666445, ILMN_1806908, ILMN_1716563, ILMN_1770905, ILMN_1774945, ILMN_1809695	218	87	5085	2.14489	0.999992	0.624008	61.3349
PUBMED_ID	17192257	6	0.765306	0.077773	ILMN_1771800, ILMN_1758939, ILMN_1806908, ILMN_1776708, ILMN_1716563, ILMN_1733421, ILMN_1809695	783	80	27491	2.63324	1	0.999994	81.852
KEGG_PATHWAY	hsa05214:Glioma	6	0.765306	0.129845	ILMN_1771800, ILMN_1666445, ILMN_1652143, ILMN_1806908, ILMN_1716563, ILMN_1770905, ILMN_1809695	218	63	5085	2.22149	1	0.744114	80.8925
BIOCARTA	h_biopeptidesPathway:Bioactive Peptide Induced Signaling Pathway	4	0.510204	0.197924	ILMN_1771800, ILMN_1754375, ILMN_1806908, ILMN_1716563, ILMN_1809695	75	30	1437	2.55467	1	0.999912	92.2522
KEGG_PATHWAY	hsa04114:Oocyte meiosis	5	0.637755	0.698125	ILMN_1779401, ILMN_1666445, ILMN_1708588, ILMN_1810691, ILMN_1809695	218	110	5085	1.06026	1	0.970441	99.9999
Annotation Cluster 43	Enrichment Score: 1.5092958180074165
Category	Term	Count	%	PValue	Genes	List Total	Pop Hits	Pop Total	Fold Enrichment	Bonferroni	Benjamini	FDR
SP_PIR_KEYWORDS	prenylation	18	2.29592	0.000195523	ILMN_1741356, ILMN_1804339, ILMN_1651838, ILMN_1677404, ILMN_1733045, ILMN_1807925, ILMN_1688877, ILMN_1653464, ILMN_1810559, ILMN_1788813, ILMN_1752299, ILMN_1683148, ILMN_1685820, ILMN_1676358, ILMN_1738266, ILMN_1759513, ILMN_1698445, ILMN_1658759	778	156	19235	2.85273	0.0872725	0.00455549	0.278495
UP_SEQ_FEATURE	short sequence motif:Effector region	11	1.40306	0.00521843	ILMN_1810559, ILMN_1788813, ILMN_1651838, ILMN_1677404, ILMN_1733045, ILMN_1688877, ILMN_1752299, ILMN_1653464, ILMN_1676358, ILMN_1738266, ILMN_1759513	778	95	19113	2.84458	0.999974	0.323523	8.61102
INTERPRO	IPR001806:Ras GTPase	13	1.65816	0.010114	ILMN_1651838, ILMN_1677404, ILMN_1733045, ILMN_1688877, ILMN_1653464, ILMN_1810559, ILMN_1788813, ILMN_1752299, ILMN_1746359, ILMN_1676358, ILMN_1685820, ILMN_1738266, ILMN_1759513	689	135	16659	2.3283	0.999984	0.28433	14.9814
GOTERM_BP_FAT	GO:0007264~small GTPase mediated signal transduction	22	2.80612	0.0179249	ILMN_1678143, ILMN_1779401, ILMN_1651838, ILMN_1677404, ILMN_1733045, ILMN_1766925, ILMN_1688877, ILMN_1653464, ILMN_1776708, ILMN_1698307, ILMN_1734742, ILMN_1728650, ILMN_1810559, ILMN_1788813, ILMN_1746359, ILMN_1752299, ILMN_1685820, ILMN_1676358, ILMN_1738266, ILMN_1770905, ILMN_1759513, ILMN_1672878	568	305	13528	1.71794	1	0.305313	27.3994
GOTERM_MF_FAT	GO:0003924~GTPase activity	17	2.16837	0.0196214	ILMN_1791726, ILMN_1746027, ILMN_1651838, ILMN_1677404, ILMN_1688877, ILMN_1653464, ILMN_1810559, ILMN_1788813, ILMN_1734857, ILMN_1689251, ILMN_1746359, ILMN_1752299, ILMN_1676358, ILMN_1738266, ILMN_1759513, ILMN_1780769, ILMN_1662358	558	211	12983	1.87459	1	0.383688	26.2494
SP_PIR_KEYWORDS	gtp-binding	22	2.80612	0.0266262	ILMN_1791726, ILMN_1746027, ILMN_1808590, ILMN_1651838, ILMN_1677404, ILMN_1733045, ILMN_1688877, ILMN_1653464, ILMN_1788813, ILMN_1810559, ILMN_1713756, ILMN_1734857, ILMN_1689251, ILMN_1746359, ILMN_1752299, ILMN_1685820, ILMN_1676358, ILMN_1738266, ILMN_1759513, ILMN_1780769, ILMN_1751072, ILMN_1662358	778	329	19235	1.65325	0.999997	0.230921	31.9476
UP_SEQ_FEATURE	nucleotide phosphate-binding region:GTP	20	2.55102	0.0331655	ILMN_1791726, ILMN_1746027, ILMN_1651838, ILMN_1677404, ILMN_1733045, ILMN_1688877, ILMN_1653464, ILMN_1788813, ILMN_1810559, ILMN_1734857, ILMN_1689251, ILMN_1746359, ILMN_1752299, ILMN_1685820, ILMN_1676358, ILMN_1738266, ILMN_1759513, ILMN_1780769, ILMN_1751072, ILMN_1662358	778	295	19113	1.66555	1	0.757627	44.0362
INTERPRO	IPR013753:Ras	11	1.40306	0.0342616	ILMN_1810559, ILMN_1651838, ILMN_1677404, ILMN_1733045, ILMN_1688877, ILMN_1746359, ILMN_1752299, ILMN_1653464, ILMN_1685820, ILMN_1676358, ILMN_1759513	689	125	16659	2.12771	1	0.568869	42.6848
UP_SEQ_FEATURE	lipid moiety-binding region:S-geranylgeranyl cysteine	9	1.14796	0.0559501	ILMN_1788813, ILMN_1651838, ILMN_1733045, ILMN_1807925, ILMN_1688877, ILMN_1752299, ILMN_1685820, ILMN_1676358, ILMN_1738266	778	102	19113	2.16766	1	0.86031	62.8757
SP_PIR_KEYWORDS	methylation	16	2.04082	0.066879	ILMN_1672660, ILMN_1721093, ILMN_1651838, ILMN_1677404, ILMN_1807925, ILMN_1688877, ILMN_1653464, ILMN_1810559, ILMN_1788813, ILMN_1772762, ILMN_1752299, ILMN_1658237, ILMN_1676358, ILMN_1738266, ILMN_1759513, ILMN_1669714	778	242	19235	1.63462	1	0.438559	62.7392
INTERPRO	IPR003577:Ras small GTPase, Ras type	4	0.510204	0.0672622	ILMN_1677404, ILMN_1746359, ILMN_1653464, ILMN_1676358	689	23	16659	4.20496	1	0.722431	67.1007
GOTERM_MF_FAT	GO:0005525~GTP binding	23	2.93367	0.0790675	ILMN_1791726, ILMN_1746027, ILMN_1808590, ILMN_1651838, ILMN_1677404, ILMN_1733045, ILMN_1688877, ILMN_1653464, ILMN_1788813, ILMN_1810559, ILMN_1713756, ILMN_1734857, ILMN_1689251, ILMN_1746359, ILMN_1752299, ILMN_1685820, ILMN_1676358, ILMN_1765860, ILMN_1738266, ILMN_1759513, ILMN_1780769, ILMN_1751072, ILMN_1662358	558	372	12983	1.43855	1	0.721047	71.793
SMART	SM00173:RAS	4	0.510204	0.0825102	ILMN_1677404, ILMN_1746359, ILMN_1653464, ILMN_1676358	410	23	9079	3.85111	1	0.523162	66.4496
INTERPRO	IPR005225:Small GTP-binding protein	12	1.53061	0.0858711	ILMN_1810559, ILMN_1788813, ILMN_1651838, ILMN_1677404, ILMN_1733045, ILMN_1688877, ILMN_1746359, ILMN_1752299, ILMN_1653464, ILMN_1685820, ILMN_1676358, ILMN_1759513	689	167	16659	1.73738	1	0.787263	76.152
GOTERM_MF_FAT	GO:0032561~guanyl ribonucleotide binding	23	2.93367	0.0975992	ILMN_1791726, ILMN_1746027, ILMN_1808590, ILMN_1651838, ILMN_1677404, ILMN_1733045, ILMN_1688877, ILMN_1653464, ILMN_1788813, ILMN_1810559, ILMN_1713756, ILMN_1734857, ILMN_1689251, ILMN_1746359, ILMN_1752299, ILMN_1685820, ILMN_1676358, ILMN_1765860, ILMN_1738266, ILMN_1759513, ILMN_1780769, ILMN_1751072, ILMN_1662358	558	382	12983	1.40089	1	0.760003	79.3601
GOTERM_MF_FAT	GO:0019001~guanyl nucleotide binding	23	2.93367	0.0975992	ILMN_1791726, ILMN_1746027, ILMN_1808590, ILMN_1651838, ILMN_1677404, ILMN_1733045, ILMN_1688877, ILMN_1653464, ILMN_1788813, ILMN_1810559, ILMN_1713756, ILMN_1734857, ILMN_1689251, ILMN_1746359, ILMN_1752299, ILMN_1685820, ILMN_1676358, ILMN_1765860, ILMN_1738266, ILMN_1759513, ILMN_1780769, ILMN_1751072, ILMN_1662358	558	382	12983	1.40089	1	0.760003	79.3601
PIR_SUPERFAMILY	PIRSF037165:ras protein	3	0.382653	0.14901	ILMN_1677404, ILMN_1746359, ILMN_1676358	319	16	7396	4.34718	1	0.99999	89.0763
Annotation Cluster 44	Enrichment Score: 1.4842260486153855
Category	Term	Count	%	PValue	Genes	List Total	Pop Hits	Pop Total	Fold Enrichment	Bonferroni	Benjamini	FDR
KEGG_PATHWAY	hsa04540:Gap junction	11	1.40306	0.00430826	ILMN_1791726, ILMN_1771800, ILMN_1808590, ILMN_1715496, ILMN_1806908, ILMN_1708588, ILMN_1724066, ILMN_1810691, ILMN_1716563, ILMN_1767145, ILMN_1780769, ILMN_1723969	218	89	5085	2.88295	0.469896	0.19068	5.00811
PUBMED_ID	10843712	5	0.637755	0.00510586	ILMN_1771800, ILMN_1806908, ILMN_1724066, ILMN_1716563, ILMN_1733421, ILMN_1723969	783	25	27491	7.02197	1	0.838819	10.2283
KEGG_PATHWAY	hsa04916:Melanogenesis	11	1.40306	0.00911628	ILMN_1791726, ILMN_1771800, ILMN_1699692, ILMN_1666445, ILMN_1712283, ILMN_1806908, ILMN_1708588, ILMN_1724066, ILMN_1810691, ILMN_1716563, ILMN_1809695, ILMN_1723969	218	99	5085	2.59174	0.739783	0.200983	10.3252
PUBMED_ID	12482669	5	0.637755	0.0243079	ILMN_1771800, ILMN_1806908, ILMN_1724066, ILMN_1716563, ILMN_1733421, ILMN_1723969	783	39	27491	4.50126	1	0.995237	40.471
UP_SEQ_FEATURE	domain:C2	8	1.02041	0.0439116	ILMN_1771800, ILMN_1658619, ILMN_1652512, ILMN_1806908, ILMN_1724066, ILMN_1716563, ILMN_1733421, ILMN_1723969, ILMN_1672878	778	80	19113	2.45668	1	0.795871	53.8292
KEGG_PATHWAY	hsa04270:Vascular smooth muscle contraction	10	1.27551	0.0487253	ILMN_1771800, ILMN_1808590, ILMN_1740508, ILMN_1806908, ILMN_1708588, ILMN_1724066, ILMN_1679754, ILMN_1810691, ILMN_1716563, ILMN_1733421, ILMN_1723969	218	112	5085	2.08265	0.999353	0.600633	44.8122
KEGG_PATHWAY	hsa04912:GnRH signaling pathway	9	1.14796	0.0567581	ILMN_1771800, ILMN_1748281, ILMN_1666445, ILMN_1806908, ILMN_1708588, ILMN_1724066, ILMN_1810691, ILMN_1716563, ILMN_1809695, ILMN_1723969	218	98	5085	2.14216	0.999814	0.614956	50.1096
KEGG_PATHWAY	hsa04720:Long-term potentiation	7	0.892857	0.0687109	ILMN_1771800, ILMN_1779401, ILMN_1666445, ILMN_1806908, ILMN_1724066, ILMN_1716563, ILMN_1809695, ILMN_1723969	218	68	5085	2.40117	0.999971	0.64881	57.1344
KEGG_PATHWAY	hsa04730:Long-term depression	6	0.765306	0.170397	ILMN_1771800, ILMN_1808590, ILMN_1668035, ILMN_1806908, ILMN_1724066, ILMN_1716563, ILMN_1723969	218	69	5085	2.02832	1	0.82027	89.1716
KEGG_PATHWAY	hsa04070:Phosphatidylinositol signaling system	6	0.765306	0.20747	ILMN_1771800, ILMN_1732636, ILMN_1806908, ILMN_1776516, ILMN_1724066, ILMN_1716563, ILMN_1723969	218	74	5085	1.89127	1	0.850275	93.7151
Annotation Cluster 45	Enrichment Score: 1.4812774128663329
Category	Term	Count	%	PValue	Genes	List Total	Pop Hits	Pop Total	Fold Enrichment	Bonferroni	Benjamini	FDR
GOTERM_BP_FAT	GO:0032103~positive regulation of response to external stimulus	9	1.14796	0.00507602	ILMN_1771800, ILMN_1718198, ILMN_1654072, ILMN_1766925, ILMN_1676449, ILMN_1703178, ILMN_1790270, ILMN_1682738, ILMN_1731062	568	64	13528	3.34925	0.999998	0.137058	8.61491
GOTERM_BP_FAT	GO:0048520~positive regulation of behavior	6	0.765306	0.0129258	ILMN_1771800, ILMN_1668035, ILMN_1766925, ILMN_1676449, ILMN_1703178, ILMN_1682738	568	34	13528	4.20298	1	0.243837	20.5715
GOTERM_BP_FAT	GO:0050921~positive regulation of chemotaxis	5	0.637755	0.0315841	ILMN_1771800, ILMN_1766925, ILMN_1676449, ILMN_1703178, ILMN_1682738	568	29	13528	4.10636	1	0.434815	43.3423
GOTERM_BP_FAT	GO:0050920~regulation of chemotaxis	5	0.637755	0.0392055	ILMN_1771800, ILMN_1766925, ILMN_1676449, ILMN_1703178, ILMN_1682738	568	31	13528	3.84144	1	0.470838	50.7379
GOTERM_BP_FAT	GO:0050795~regulation of behavior	6	0.765306	0.0424005	ILMN_1771800, ILMN_1668035, ILMN_1766925, ILMN_1676449, ILMN_1703178, ILMN_1682738	568	46	13528	3.10655	1	0.489749	53.5586
GOTERM_BP_FAT	GO:0050927~positive regulation of positive chemotaxis	4	0.510204	0.0430544	ILMN_1771800, ILMN_1766925, ILMN_1703178, ILMN_1682738	568	19	13528	5.01408	1	0.493063	54.1169
GOTERM_BP_FAT	GO:0050926~regulation of positive chemotaxis	4	0.510204	0.0430544	ILMN_1771800, ILMN_1766925, ILMN_1703178, ILMN_1682738	568	19	13528	5.01408	1	0.493063	54.1169
GOTERM_BP_FAT	GO:0043542~endothelial cell migration	4	0.510204	0.0624313	ILMN_1749662, ILMN_1766925, ILMN_1676449, ILMN_1703178	568	22	13528	4.33035	1	0.58882	68.0567
GOTERM_BP_FAT	GO:0040017~positive regulation of locomotion	8	1.02041	0.116922	ILMN_1771800, ILMN_1792409, ILMN_1766925, ILMN_1676449, ILMN_1703178, ILMN_1790270, ILMN_1682738, ILMN_1692664	568	98	13528	1.94424	1	0.753354	88.9329
Annotation Cluster 46	Enrichment Score: 1.4777431776669612
Category	Term	Count	%	PValue	Genes	List Total	Pop Hits	Pop Total	Fold Enrichment	Bonferroni	Benjamini	FDR
GOTERM_BP_FAT	GO:0051952~regulation of amine transport	6	0.765306	0.0114082	ILMN_1715496, ILMN_1651817, ILMN_1666924, ILMN_1708275, ILMN_1767145, ILMN_1653161	568	33	13528	4.33035	1	0.225079	18.3816
GOTERM_BP_FAT	GO:0050433~regulation of catecholamine secretion	4	0.510204	0.0430544	ILMN_1715496, ILMN_1666924, ILMN_1708275, ILMN_1653161	568	19	13528	5.01408	1	0.493063	54.1169
GOTERM_BP_FAT	GO:0014059~regulation of dopamine secretion	3	0.382653	0.0750821	ILMN_1715496, ILMN_1666924, ILMN_1653161	568	11	13528	6.49552	1	0.632511	74.8848
Annotation Cluster 47	Enrichment Score: 1.4642645288442935
Category	Term	Count	%	PValue	Genes	List Total	Pop Hits	Pop Total	Fold Enrichment	Bonferroni	Benjamini	FDR
INTERPRO	IPR001611:Leucine-rich repeat	19	2.42347	0.00325492	ILMN_1737162, ILMN_1658685, ILMN_1692739, ILMN_1756959, ILMN_1685472, ILMN_1663037, ILMN_1810593, ILMN_1756755, ILMN_1765855, ILMN_1688639, ILMN_1739235, ILMN_1738639, ILMN_1676449, ILMN_1756230, ILMN_1712026, ILMN_1739683, ILMN_1776967, ILMN_1680774, ILMN_1769615	689	213	16659	2.15677	0.971004	0.155154	5.07207
UP_SEQ_FEATURE	repeat:LRR 5	19	2.42347	0.00649943	ILMN_1737162, ILMN_1658685, ILMN_1692739, ILMN_1756959, ILMN_1685472, ILMN_1663037, ILMN_1810593, ILMN_1662198, ILMN_1756755, ILMN_1765855, ILMN_1688639, ILMN_1739235, ILMN_1738639, ILMN_1676449, ILMN_1756230, ILMN_1712026, ILMN_1776967, ILMN_1680774, ILMN_1769615	778	231	19113	2.02065	0.999998	0.354935	10.6154
INTERPRO	IPR000483:Cysteine-rich flanking region, C-terminal	10	1.27551	0.0103699	ILMN_1737162, ILMN_1658685, ILMN_1738639, ILMN_1692739, ILMN_1676449, ILMN_1756230, ILMN_1756959, ILMN_1663037, ILMN_1769615, ILMN_1756755	689	88	16659	2.74756	0.999988	0.283198	15.3316
UP_SEQ_FEATURE	repeat:LRR 4	19	2.42347	0.0150858	ILMN_1737162, ILMN_1658685, ILMN_1692739, ILMN_1756959, ILMN_1685472, ILMN_1663037, ILMN_1810593, ILMN_1662198, ILMN_1756755, ILMN_1765855, ILMN_1688639, ILMN_1739235, ILMN_1738639, ILMN_1676449, ILMN_1756230, ILMN_1712026, ILMN_1776967, ILMN_1680774, ILMN_1769615	778	252	19113	1.85226	1	0.563361	23.0188
SMART	SM00082:LRRCT	10	1.27551	0.0172126	ILMN_1737162, ILMN_1658685, ILMN_1738639, ILMN_1692739, ILMN_1676449, ILMN_1756230, ILMN_1756959, ILMN_1663037, ILMN_1769615, ILMN_1756755	410	88	9079	2.51635	0.976077	0.249599	19.7638
INTERPRO	IPR003591:Leucine-rich repeat, typical subtype	12	1.53061	0.0198409	ILMN_1737162, ILMN_1765855, ILMN_1739235, ILMN_1738639, ILMN_1692739, ILMN_1676449, ILMN_1756230, ILMN_1756959, ILMN_1685472, ILMN_1663037, ILMN_1769615, ILMN_1756755	689	131	16659	2.21483	1	0.436018	27.3823
INTERPRO	IPR000372:Leucine-rich repeat, cysteine-rich flanking region, N-terminal	10	1.27551	0.021151	ILMN_1739235, ILMN_1738639, ILMN_1692739, ILMN_1676449, ILMN_1756230, ILMN_1756959, ILMN_1685472, ILMN_1663037, ILMN_1769615, ILMN_1756755	689	99	16659	2.44227	1	0.440331	28.9165
UP_SEQ_FEATURE	repeat:LRR 6	16	2.04082	0.0249095	ILMN_1756959, ILMN_1685472, ILMN_1663037, ILMN_1810593, ILMN_1662198, ILMN_1756755, ILMN_1688639, ILMN_1765855, ILMN_1739235, ILMN_1738639, ILMN_1676449, ILMN_1712026, ILMN_1756230, ILMN_1776967, ILMN_1680774, ILMN_1769615	778	210	19113	1.87176	1	0.685363	35.217
UP_SEQ_FEATURE	repeat:LRR 7	14	1.78571	0.0289348	ILMN_1756959, ILMN_1685472, ILMN_1663037, ILMN_1810593, ILMN_1756755, ILMN_1688639, ILMN_1765855, ILMN_1739235, ILMN_1738639, ILMN_1676449, ILMN_1712026, ILMN_1756230, ILMN_1680774, ILMN_1769615	778	177	19113	1.94314	1	0.724025	39.6687
SMART	SM00013:LRRNT	10	1.27551	0.0339918	ILMN_1739235, ILMN_1738639, ILMN_1692739, ILMN_1676449, ILMN_1756230, ILMN_1756959, ILMN_1685472, ILMN_1663037, ILMN_1769615, ILMN_1756755	410	99	9079	2.23676	0.99941	0.371682	35.5056
SMART	SM00369:LRR_TYP	12	1.53061	0.0340046	ILMN_1737162, ILMN_1765855, ILMN_1739235, ILMN_1738639, ILMN_1692739, ILMN_1676449, ILMN_1756230, ILMN_1756959, ILMN_1685472, ILMN_1663037, ILMN_1769615, ILMN_1756755	410	131	9079	2.02845	0.999412	0.354377	35.5164
UP_SEQ_FEATURE	repeat:LRR 1	21	2.67857	0.0363891	ILMN_1737162, ILMN_1658685, ILMN_1692739, ILMN_1756959, ILMN_1685472, ILMN_1663037, ILMN_1810593, ILMN_1662198, ILMN_1756755, ILMN_1773695, ILMN_1765855, ILMN_1688639, ILMN_1739235, ILMN_1738639, ILMN_1676449, ILMN_1756230, ILMN_1712026, ILMN_1739683, ILMN_1776967, ILMN_1680774, ILMN_1769615	778	318	19113	1.62234	1	0.775822	47.1622
UP_SEQ_FEATURE	repeat:LRR 3	20	2.55102	0.0376229	ILMN_1737162, ILMN_1658685, ILMN_1692739, ILMN_1756959, ILMN_1685472, ILMN_1663037, ILMN_1810593, ILMN_1662198, ILMN_1756755, ILMN_1765855, ILMN_1688639, ILMN_1739235, ILMN_1738639, ILMN_1676449, ILMN_1756230, ILMN_1712026, ILMN_1739683, ILMN_1776967, ILMN_1680774, ILMN_1769615	778	299	19113	1.64327	1	0.774062	48.3144
UP_SEQ_FEATURE	repeat:LRR 2	21	2.67857	0.0378281	ILMN_1737162, ILMN_1658685, ILMN_1692739, ILMN_1756959, ILMN_1685472, ILMN_1663037, ILMN_1810593, ILMN_1662198, ILMN_1756755, ILMN_1773695, ILMN_1765855, ILMN_1688639, ILMN_1739235, ILMN_1738639, ILMN_1676449, ILMN_1756230, ILMN_1712026, ILMN_1739683, ILMN_1776967, ILMN_1680774, ILMN_1769615	778	319	19113	1.61725	1	0.769509	48.5038
SP_PIR_KEYWORDS	leucine-rich repeat	21	2.67857	0.0382237	ILMN_1737162, ILMN_1658685, ILMN_1692739, ILMN_1756959, ILMN_1685472, ILMN_1663037, ILMN_1810593, ILMN_1662198, ILMN_1756755, ILMN_1773695, ILMN_1765855, ILMN_1688639, ILMN_1739235, ILMN_1738639, ILMN_1676449, ILMN_1756230, ILMN_1712026, ILMN_1739683, ILMN_1776967, ILMN_1680774, ILMN_1769615	778	322	19235	1.61241	1	0.29532	42.6412
UP_SEQ_FEATURE	repeat:LRR 9	9	1.14796	0.184462	ILMN_1765855, ILMN_1688639, ILMN_1676449, ILMN_1756959, ILMN_1685472, ILMN_1663037, ILMN_1810593, ILMN_1769615, ILMN_1756755	778	135	19113	1.63779	1	0.990158	97.0082
UP_SEQ_FEATURE	repeat:LRR 10	8	1.02041	0.198962	ILMN_1765855, ILMN_1688639, ILMN_1676449, ILMN_1756959, ILMN_1685472, ILMN_1810593, ILMN_1769615, ILMN_1756755	778	117	19113	1.67978	1	0.991864	97.8029
UP_SEQ_FEATURE	repeat:LRR 8	9	1.14796	0.260634	ILMN_1765855, ILMN_1688639, ILMN_1676449, ILMN_1756959, ILMN_1685472, ILMN_1663037, ILMN_1810593, ILMN_1769615, ILMN_1756755	778	149	19113	1.4839	1	0.996974	99.4466
UP_SEQ_FEATURE	repeat:LRR 11	6	0.765306	0.400407	ILMN_1765855, ILMN_1688639, ILMN_1676449, ILMN_1756959, ILMN_1810593, ILMN_1756755	778	102	19113	1.44511	1	0.99962	99.985
Annotation Cluster 48	Enrichment Score: 1.4200402364252835
Category	Term	Count	%	PValue	Genes	List Total	Pop Hits	Pop Total	Fold Enrichment	Bonferroni	Benjamini	FDR
SP_PIR_KEYWORDS	lipoprotein	55	7.01531	3.01269e-07	ILMN_1791726, ILMN_1746027, ILMN_1701603, ILMN_1779401, ILMN_1804339, ILMN_1677404, ILMN_1766925, ILMN_1815033, ILMN_1688886, ILMN_1677746, ILMN_1739235, ILMN_1685820, ILMN_1787552, ILMN_1698445, ILMN_1673998, ILMN_1750181, ILMN_1807925, ILMN_1733045, ILMN_1688877, ILMN_1761280, ILMN_1718198, ILMN_1684447, ILMN_1808258, ILMN_1752299, ILMN_1683148, ILMN_1747979, ILMN_1790508, ILMN_1738266, ILMN_17…	778	642	19235	2.11807	0.000140683	3.51726e-05	0.000429673
UP_SEQ_FEATURE	lipid moiety-binding region:S-palmitoyl cysteine	20	2.55102	0.000150409	ILMN_1791726, ILMN_1673998, ILMN_1746027, ILMN_1800787, ILMN_1744403, ILMN_1796925, ILMN_1687751, ILMN_1689043, ILMN_1758067, ILMN_1761280, ILMN_1718198, ILMN_1808258, ILMN_1685820, ILMN_1679754, ILMN_1790508, ILMN_1774132, ILMN_1787552, ILMN_1698445, ILMN_1707717, ILMN_1799878, ILMN_1733259	778	181	19113	2.71457	0.261694	0.0588751	0.258541
PUBMED_ID	18270970	6	0.765306	0.000256102	ILMN_1663640, ILMN_1715496, ILMN_1808258, ILMN_1727360, ILMN_1767145, ILMN_1689043	783	21	27491	10.0314	0.971613	0.149474	0.538442
SP_PIR_KEYWORDS	palmitate	20	2.55102	0.00106907	ILMN_1791726, ILMN_1673998, ILMN_1746027, ILMN_1800787, ILMN_1744403, ILMN_1796925, ILMN_1687751, ILMN_1689043, ILMN_1758067, ILMN_1761280, ILMN_1718198, ILMN_1808258, ILMN_1685820, ILMN_1679754, ILMN_1790508, ILMN_1774132, ILMN_1787552, ILMN_1698445, ILMN_1707717, ILMN_1799878, ILMN_1733259	778	213	19235	2.32147	0.393179	0.0197826	1.51395
GOTERM_MF_FAT	GO:0008227~amine receptor activity	8	1.02041	0.00162537	ILMN_1715496, ILMN_1751689, ILMN_1808258, ILMN_1679754, ILMN_1767145, ILMN_1787552, ILMN_1710410, ILMN_1689043	558	41	12983	4.53991	0.73048	0.057855	2.46845
PUBMED_ID	18079067	4	0.510204	0.00529787	ILMN_1663640, ILMN_1715496, ILMN_1808258, ILMN_1767145	783	13	27491	10.803	1	0.842243	10.5928
KEGG_PATHWAY	hsa04080:Neuroactive ligand-receptor interaction	21	2.67857	0.00595992	ILMN_1791726, ILMN_1673998, ILMN_1715496, ILMN_1751689, ILMN_1651817, ILMN_1673521, ILMN_1689043, ILMN_1761280, ILMN_1718198, ILMN_1758400, ILMN_1808258, ILMN_1729075, ILMN_1707571, ILMN_1679754, ILMN_1767145, ILMN_1693604, ILMN_1787552, ILMN_1710410, ILMN_1729212, ILMN_1799878, ILMN_1733259	218	256	5085	1.91344	0.584689	0.161169	6.86635
PUBMED_ID	11140838	7	0.892857	0.00651206	ILMN_1663640, ILMN_1715496, ILMN_1712943, ILMN_1668035, ILMN_1707571, ILMN_1767145, ILMN_1689043	783	59	27491	4.16557	1	0.867205	12.8652
PUBMED_ID	15241435	3	0.382653	0.00763256	ILMN_1663640, ILMN_1715496, ILMN_1767145	783	5	27491	21.0659	1	0.901353	14.9134
SP_PIR_KEYWORDS	neurotransmitter receptor	8	1.02041	0.0078017	ILMN_1715496, ILMN_1751689, ILMN_1808258, ILMN_1651817, ILMN_1707571, ILMN_1767145, ILMN_1710410, ILMN_1689043	778	57	19235	3.46999	0.974208	0.0992298	10.5692
PUBMED_ID	12877392	3	0.382653	0.0112338	ILMN_1663640, ILMN_1715496, ILMN_1767145	783	6	27491	17.5549	1	0.959488	21.1903
PUBMED_ID	15052272	3	0.382653	0.0154327	ILMN_1663640, ILMN_1715496, ILMN_1767145	783	7	27491	15.0471	1	0.98438	27.9519
PUBMED_ID	19032968	3	0.382653	0.0312547	ILMN_1663640, ILMN_1715496, ILMN_1767145	783	10	27491	10.533	1	0.998487	48.7944
PUBMED_ID	18855532	3	0.382653	0.0374915	ILMN_1715496, ILMN_1767145, ILMN_1689043	783	11	27491	9.57541	1	0.999495	55.312
GOTERM_BP_FAT	GO:0051345~positive regulation of hydrolase activity	14	1.78571	0.0382306	ILMN_1715496, ILMN_1779875, ILMN_1703006, ILMN_1751689, ILMN_1712943, ILMN_1724066, ILMN_1682738, ILMN_1689043, ILMN_1761280, ILMN_1664071, ILMN_1712026, ILMN_1767145, ILMN_1787552, ILMN_1680774	568	179	13528	1.86277	1	0.470608	49.8455
GOTERM_BP_FAT	GO:0019932~second-messenger-mediated signaling	17	2.16837	0.0389373	ILMN_1791726, ILMN_1673998, ILMN_1746027, ILMN_1715496, ILMN_1751689, ILMN_1810691, ILMN_1673521, ILMN_1731062, ILMN_1689043, ILMN_1761280, ILMN_1793360, ILMN_1808258, ILMN_1708588, ILMN_1679754, ILMN_1767145, ILMN_1787552, ILMN_1799878	568	235	13528	1.72292	1	0.472665	50.4938
PUBMED_ID	15717291	3	0.382653	0.0441573	ILMN_1715496, ILMN_1767145, ILMN_1689043	783	12	27491	8.77746	1	0.999769	61.4013
PUBMED_ID	19352218	4	0.510204	0.0443284	ILMN_1715496, ILMN_1771622, ILMN_1808258, ILMN_1689043	783	28	27491	5.01569	1	0.999722	61.5466
GOTERM_BP_FAT	GO:0051336~regulation of hydrolase activity	22	2.80612	0.0458214	ILMN_1715496, ILMN_1703006, ILMN_1779875, ILMN_1712943, ILMN_1685441, ILMN_1751689, ILMN_1724066, ILMN_1682738, ILMN_1661622, ILMN_1653894, ILMN_1772686, ILMN_1707077, ILMN_1689043, ILMN_1690963, ILMN_1761280, ILMN_1664071, ILMN_1749662, ILMN_1712026, ILMN_1767145, ILMN_1741540, ILMN_1787552, ILMN_1680774	568	337	13528	1.55481	1	0.511052	56.4096
GOTERM_BP_FAT	GO:0007202~activation of phospholipase C activity	7	0.892857	0.0542778	ILMN_1761280, ILMN_1715496, ILMN_1751689, ILMN_1724066, ILMN_1767145, ILMN_1787552, ILMN_1689043	568	65	13528	2.5649	1	0.556394	62.7651
GOTERM_BP_FAT	GO:0010863~positive regulation of phospholipase C activity	7	0.892857	0.0542778	ILMN_1761280, ILMN_1715496, ILMN_1751689, ILMN_1724066, ILMN_1767145, ILMN_1787552, ILMN_1689043	568	65	13528	2.5649	1	0.556394	62.7651
GOTERM_BP_FAT	GO:0007200~activation of phospholipase C activity by G-protein coupled receptor protein signaling pathway coupled to IP3 second messenger	6	0.765306	0.065764	ILMN_1761280, ILMN_1715496, ILMN_1751689, ILMN_1767145, ILMN_1787552, ILMN_1689043	568	52	13528	2.7481	1	0.600753	70.0082
GOTERM_BP_FAT	GO:0010518~positive regulation of phospholipase activity	7	0.892857	0.0686946	ILMN_1761280, ILMN_1715496, ILMN_1751689, ILMN_1724066, ILMN_1767145, ILMN_1787552, ILMN_1689043	568	69	13528	2.41621	1	0.611603	71.6308
GOTERM_BP_FAT	GO:0060191~regulation of lipase activity	8	1.02041	0.0722309	ILMN_1761280, ILMN_1715496, ILMN_1751689, ILMN_1724066, ILMN_1767145, ILMN_1787552, ILMN_1707077, ILMN_1689043	568	87	13528	2.19006	1	0.619548	73.4784
GOTERM_BP_FAT	GO:0010517~regulation of phospholipase activity	7	0.892857	0.0766585	ILMN_1761280, ILMN_1715496, ILMN_1751689, ILMN_1724066, ILMN_1767145, ILMN_1787552, ILMN_1689043	568	71	13528	2.34815	1	0.636823	75.6319
PUBMED_ID	19193342	3	0.382653	0.0829373	ILMN_1715496, ILMN_1767145, ILMN_1787552	783	17	27491	6.19585	1	0.999996	83.8778
GOTERM_BP_FAT	GO:0060193~positive regulation of lipase activity	7	0.892857	0.0940802	ILMN_1761280, ILMN_1715496, ILMN_1751689, ILMN_1724066, ILMN_1767145, ILMN_1787552, ILMN_1689043	568	75	13528	2.22291	1	0.694173	82.607
SP_PIR_KEYWORDS	G protein-coupled receptor	9	1.14796	0.0976893	ILMN_1673998, ILMN_1715496, ILMN_1751689, ILMN_1808258, ILMN_1679754, ILMN_1767145, ILMN_1710410, ILMN_1733259, ILMN_1689043	778	116	19235	1.91821	1	0.538968	76.9175
GOTERM_BP_FAT	GO:0043085~positive regulation of catalytic activity	29	3.69898	0.104592	ILMN_1715496, ILMN_1746027, ILMN_1779875, ILMN_1703006, ILMN_1732636, ILMN_1810691, ILMN_1698307, ILMN_1728650, ILMN_1664071, ILMN_1708588, ILMN_1682757, ILMN_1787552, ILMN_1733259, ILMN_1763344, ILMN_1754375, ILMN_1712943, ILMN_1751689, ILMN_1797604, ILMN_1724066, ILMN_1682738, ILMN_1673521, ILMN_1689043, ILMN_1761280, ILMN_1667081, ILMN_1691237, ILMN_1712026, ILMN_1767145, ILMN_1680774, ILMN_17…	568	520	13528	1.32825	1	0.724375	85.8536
GOTERM_MF_FAT	GO:0004993~serotonin receptor activity	3	0.382653	0.104891	ILMN_1715496, ILMN_1808258, ILMN_1767145	558	13	12983	5.36931	1	0.774298	81.7791
PUBMED_ID	10391209	5	0.637755	0.128274	ILMN_1715496, ILMN_1767145, ILMN_1776640, ILMN_1710859, ILMN_1689043	783	68	27491	2.58161	1	1	94.4628
GOTERM_BP_FAT	GO:0048015~phosphoinositide-mediated signaling	7	0.892857	0.163566	ILMN_1761280, ILMN_1715496, ILMN_1751689, ILMN_1767145, ILMN_1731062, ILMN_1787552, ILMN_1689043	568	88	13528	1.89453	1	0.844976	95.7652
GOTERM_MF_FAT	GO:0043176~amine binding	8	1.02041	0.193341	ILMN_1715496, ILMN_1758400, ILMN_1713756, ILMN_1751689, ILMN_1767145, ILMN_1749324, ILMN_1710410, ILMN_1689043	558	110	12983	1.69215	1	0.897571	96.3163
GOTERM_BP_FAT	GO:0007186~G-protein coupled receptor protein signaling pathway	52	6.63265	0.292499	ILMN_1812946, ILMN_1791726, ILMN_1715496, ILMN_1746027, ILMN_1695935, ILMN_1740250, ILMN_1731062, ILMN_1770454, ILMN_1773109, ILMN_1793360, ILMN_1729075, ILMN_1707571, ILMN_1708588, ILMN_1693604, ILMN_1787552, ILMN_1747019, ILMN_1673998, ILMN_1712943, ILMN_1807925, ILMN_1680251, ILMN_1728785, ILMN_1761280, ILMN_1718198, ILMN_1771622, ILMN_1808258, ILMN_1786966, ILMN_1734857, ILMN_1793006, ILMN_16…	568	1123	13528	1.10283	1	0.939501	99.7813
GOTERM_MF_FAT	GO:0008144~drug binding	3	0.382653	0.708684	ILMN_1751689, ILMN_1710410, ILMN_1689043	558	57	12983	1.22458	1	0.998617	100
SP_PIR_KEYWORDS	transmembrane protein	24	3.06122	0.753369	ILMN_1720113, ILMN_1673998, ILMN_1715496, ILMN_1746116, ILMN_1779875, ILMN_1762825, ILMN_1751689, ILMN_1686623, ILMN_1769891, ILMN_1689043, ILMN_1728844, ILMN_1808258, ILMN_1707571, ILMN_1756230, ILMN_1679754, ILMN_1651900, ILMN_1790508, ILMN_1767145, ILMN_1742731, ILMN_1787552, ILMN_1710410, ILMN_1756501, ILMN_1776640, ILMN_1733259	778	642	19235	0.924249	1	0.987931	100
SP_PIR_KEYWORDS	receptor	54	6.88776	0.939489	ILMN_1812946, ILMN_1791726, ILMN_1720113, ILMN_1715496, ILMN_1686623, ILMN_1660549, ILMN_1727633, ILMN_1773109, ILMN_1758939, ILMN_1671260, ILMN_1729075, ILMN_1693604, ILMN_1663263, ILMN_1787552, ILMN_1673998, ILMN_1753502, ILMN_1651817, ILMN_1680251, ILMN_1728785, ILMN_1810962, ILMN_1761280, ILMN_1728844, ILMN_1718198, ILMN_1758400, ILMN_1808258, ILMN_1712026, ILMN_1767145, ILMN_1764964, ILMN_16…	778	1583	19235	0.843384	1	0.999414	100
SP_PIR_KEYWORDS	transducer	28	3.57143	0.943901	ILMN_1791726, ILMN_1812946, ILMN_1715496, ILMN_1746027, ILMN_1773109, ILMN_1729075, ILMN_1693604, ILMN_1787552, ILMN_1710410, ILMN_1729212, ILMN_1799878, ILMN_1723969, ILMN_1733259, ILMN_1673998, ILMN_1751689, ILMN_1807925, ILMN_1697548, ILMN_1728785, ILMN_1724066, ILMN_1711208, ILMN_1673521, ILMN_1689043, ILMN_1761280, ILMN_1718198, ILMN_1808258, ILMN_1734857, ILMN_1679754, ILMN_1767145	778	874	19235	0.792062	1	0.999478	100
SP_PIR_KEYWORDS	g-protein coupled receptor	23	2.93367	0.985591	ILMN_1791726, ILMN_1673998, ILMN_1812946, ILMN_1715496, ILMN_1751689, ILMN_1697548, ILMN_1728785, ILMN_1711208, ILMN_1673521, ILMN_1773109, ILMN_1689043, ILMN_1761280, ILMN_1718198, ILMN_1808258, ILMN_1729075, ILMN_1679754, ILMN_1767145, ILMN_1693604, ILMN_1787552, ILMN_1710410, ILMN_1729212, ILMN_1799878, ILMN_1733259	778	816	19235	0.696868	1	0.999975	100
INTERPRO	IPR017452:GPCR, rhodopsin-like superfamily	16	2.04082	0.999377	ILMN_1791726, ILMN_1673998, ILMN_1812946, ILMN_1715496, ILMN_1751689, ILMN_1673521, ILMN_1689043, ILMN_1761280, ILMN_1718198, ILMN_1808258, ILMN_1679754, ILMN_1767145, ILMN_1787552, ILMN_1710410, ILMN_1733259, ILMN_1799878	689	726	16659	0.53286	1	1	100
INTERPRO	IPR000276:7TM GPCR, rhodopsin-like	16	2.04082	0.999392	ILMN_1791726, ILMN_1673998, ILMN_1812946, ILMN_1715496, ILMN_1751689, ILMN_1673521, ILMN_1689043, ILMN_1761280, ILMN_1718198, ILMN_1808258, ILMN_1679754, ILMN_1767145, ILMN_1787552, ILMN_1710410, ILMN_1733259, ILMN_1799878	689	727	16659	0.532127	1	1	100
PIR_SUPERFAMILY	PIRSF800006:rhodopsin-like G protein-coupled receptors	14	1.78571	0.999897	ILMN_1791726, ILMN_1673998, ILMN_1812946, ILMN_1715496, ILMN_1751689, ILMN_1673521, ILMN_1689043, ILMN_1761280, ILMN_1808258, ILMN_1679754, ILMN_1767145, ILMN_1787552, ILMN_1710410, ILMN_1733259	319	686	7396	0.473162	1	1	100
Annotation Cluster 49	Enrichment Score: 1.3978527007205037
Category	Term	Count	%	PValue	Genes	List Total	Pop Hits	Pop Total	Fold Enrichment	Bonferroni	Benjamini	FDR
GOTERM_MF_FAT	GO:0008188~neuropeptide receptor activity	7	0.892857	0.00672347	ILMN_1673998, ILMN_1761280, ILMN_1718198, ILMN_1680251, ILMN_1695935, ILMN_1665492, ILMN_1673521, ILMN_1799878	558	40	12983	4.07173	0.995649	0.19547	9.84643
GOTERM_MF_FAT	GO:0042923~neuropeptide binding	7	0.892857	0.00759743	ILMN_1673998, ILMN_1761280, ILMN_1718198, ILMN_1680251, ILMN_1695935, ILMN_1665492, ILMN_1673521, ILMN_1799878	558	41	12983	3.97242	0.99786	0.203608	11.0576
GOTERM_MF_FAT	GO:0042165~neurotransmitter binding	11	1.40306	0.012872	ILMN_1673998, ILMN_1761280, ILMN_1718198, ILMN_1758400, ILMN_1751689, ILMN_1680251, ILMN_1695935, ILMN_1707571, ILMN_1665492, ILMN_1673521, ILMN_1710410, ILMN_1799878	558	103	12983	2.48483	0.999971	0.293952	18.0502
GOTERM_MF_FAT	GO:0030594~neurotransmitter receptor activity	10	1.27551	0.020584	ILMN_1673998, ILMN_1761280, ILMN_1718198, ILMN_1751689, ILMN_1680251, ILMN_1695935, ILMN_1707571, ILMN_1665492, ILMN_1673521, ILMN_1710410, ILMN_1799878	558	95	12983	2.44916	1	0.389242	27.3543
GOTERM_MF_FAT	GO:0001653~peptide receptor activity	8	1.02041	0.217768	ILMN_1673998, ILMN_1791726, ILMN_1761280, ILMN_1718198, ILMN_1680251, ILMN_1695935, ILMN_1665492, ILMN_1673521, ILMN_1799878	558	114	12983	1.63277	1	0.918388	97.7034
GOTERM_MF_FAT	GO:0008528~peptide receptor activity, G-protein coupled	8	1.02041	0.217768	ILMN_1673998, ILMN_1791726, ILMN_1761280, ILMN_1718198, ILMN_1680251, ILMN_1695935, ILMN_1665492, ILMN_1673521, ILMN_1799878	558	114	12983	1.63277	1	0.918388	97.7034
GOTERM_MF_FAT	GO:0042277~peptide binding	12	1.53061	0.255627	ILMN_1791726, ILMN_1673998, ILMN_1695935, ILMN_1680251, ILMN_1673521, ILMN_1710859, ILMN_1761280, ILMN_1718198, ILMN_1749662, ILMN_1761312, ILMN_1665492, ILMN_1721128, ILMN_1799878	558	203	12983	1.37539	1	0.933055	98.9284
Annotation Cluster 50	Enrichment Score: 1.3913168884233538
Category	Term	Count	%	PValue	Genes	List Total	Pop Hits	Pop Total	Fold Enrichment	Bonferroni	Benjamini	FDR
GOTERM_BP_FAT	GO:0007611~learning or memory	12	1.53061	0.00681172	ILMN_1771800, ILMN_1754375, ILMN_1715496, ILMN_1761312, ILMN_1668035, ILMN_1805098, ILMN_1707571, ILMN_1679754, ILMN_1790270, ILMN_1770905, ILMN_1723969, ILMN_1689043	568	111	13528	2.5748	1	0.169295	11.3964
GOTERM_BP_FAT	GO:0043279~response to alkaloid	8	1.02041	0.00701881	ILMN_1754375, ILMN_1746027, ILMN_1679754, ILMN_1790270, ILMN_1767145, ILMN_1693604, ILMN_1710859, ILMN_1689043	568	54	13528	3.52843	1	0.170721	11.7229
GOTERM_BP_FAT	GO:0014070~response to organic cyclic substance	12	1.53061	0.0126691	ILMN_1771800, ILMN_1667081, ILMN_1754375, ILMN_1746027, ILMN_1698554, ILMN_1679754, ILMN_1790270, ILMN_1767145, ILMN_1693604, ILMN_1733421, ILMN_1710859, ILMN_1689043	568	121	13528	2.36201	1	0.241351	20.2051
GOTERM_BP_FAT	GO:0008306~associative learning	4	0.510204	0.0321298	ILMN_1754375, ILMN_1707571, ILMN_1790270, ILMN_1689043	568	17	13528	5.60398	1	0.436013	43.9049
GOTERM_BP_FAT	GO:0007612~learning	7	0.892857	0.0390742	ILMN_1754375, ILMN_1805098, ILMN_1707571, ILMN_1679754, ILMN_1790270, ILMN_1723969, ILMN_1689043	568	60	13528	2.77864	1	0.47177	50.6185
GOTERM_BP_FAT	GO:0007632~visual behavior	5	0.637755	0.0392055	ILMN_1754375, ILMN_1805098, ILMN_1679754, ILMN_1785380, ILMN_1689043	568	31	13528	3.84144	1	0.470838	50.7379
GOTERM_BP_FAT	GO:0048148~behavioral response to cocaine	3	0.382653	0.0415137	ILMN_1754375, ILMN_1679754, ILMN_1693604	568	8	13528	8.93134	1	0.486501	52.7914
GOTERM_BP_FAT	GO:0014073~response to tropane	4	0.510204	0.0430544	ILMN_1754375, ILMN_1679754, ILMN_1693604, ILMN_1689043	568	19	13528	5.01408	1	0.493063	54.1169
GOTERM_BP_FAT	GO:0042220~response to cocaine	4	0.510204	0.0430544	ILMN_1754375, ILMN_1679754, ILMN_1693604, ILMN_1689043	568	19	13528	5.01408	1	0.493063	54.1169
GOTERM_BP_FAT	GO:0009628~response to abiotic stimulus	23	2.93367	0.0602661	ILMN_1791726, ILMN_1754375, ILMN_1805098, ILMN_1757497, ILMN_1720710, ILMN_1740250, ILMN_1814719, ILMN_1810962, ILMN_1725193, ILMN_1737650, ILMN_1689043, ILMN_1771800, ILMN_1791280, ILMN_1740508, ILMN_1749662, ILMN_1804556, ILMN_1812824, ILMN_1789507, ILMN_1679754, ILMN_1790270, ILMN_1733421, ILMN_1785380, ILMN_1680727	568	368	13528	1.48856	1	0.583411	66.7253
GOTERM_BP_FAT	GO:0008542~visual learning	4	0.510204	0.101935	ILMN_1754375, ILMN_1805098, ILMN_1679754, ILMN_1689043	568	27	13528	3.52843	1	0.716304	85.0918
GOTERM_BP_FAT	GO:0009416~response to light stimulus	10	1.27551	0.125612	ILMN_1791726, ILMN_1754375, ILMN_1749662, ILMN_1805098, ILMN_1740250, ILMN_1810962, ILMN_1679754, ILMN_1814719, ILMN_1785380, ILMN_1689043	568	138	13528	1.72586	1	0.772096	90.7101
GOTERM_BP_FAT	GO:0009314~response to radiation	10	1.27551	0.462185	ILMN_1791726, ILMN_1754375, ILMN_1749662, ILMN_1805098, ILMN_1740250, ILMN_1810962, ILMN_1679754, ILMN_1814719, ILMN_1785380, ILMN_1689043	568	200	13528	1.19085	1	0.981821	99.9983
Annotation Cluster 51	Enrichment Score: 1.3886348680572944
Category	Term	Count	%	PValue	Genes	List Total	Pop Hits	Pop Total	Fold Enrichment	Bonferroni	Benjamini	FDR
PUBMED_ID	11483621	4	0.510204	0.00318895	ILMN_1735798, ILMN_1773063, ILMN_1669497, ILMN_1766654	783	11	27491	12.7672	1	0.708813	6.51098
PUBMED_ID	11735225	4	0.510204	0.00416261	ILMN_1735798, ILMN_1773063, ILMN_1669497, ILMN_1766654	783	12	27491	11.7033	1	0.791482	8.41706
PUBMED_ID	10588946	3	0.382653	0.0112338	ILMN_1735798, ILMN_1773063, ILMN_1766654	783	6	27491	17.5549	1	0.959488	21.1903
INTERPRO	IPR018494:Oxysterol-binding protein, conserved site	4	0.510204	0.0116685	ILMN_1735798, ILMN_1773063, ILMN_1669497, ILMN_1766654	689	12	16659	8.05951	0.999997	0.305237	17.0881
INTERPRO	IPR000648:Oxysterol-binding protein	4	0.510204	0.0116685	ILMN_1735798, ILMN_1773063, ILMN_1669497, ILMN_1766654	689	12	16659	8.05951	0.999997	0.305237	17.0881
SP_PIR_KEYWORDS	lipid transport	5	0.637755	0.240953	ILMN_1735798, ILMN_1802690, ILMN_1773063, ILMN_1669497, ILMN_1766654	778	62	19235	1.99384	1	0.795969	98.0395
GOTERM_BP_FAT	GO:0010876~lipid localization	9	1.14796	0.337261	ILMN_1735798, ILMN_1802690, ILMN_1773063, ILMN_1788184, ILMN_1669497, ILMN_1814719, ILMN_1673521, ILMN_1705231, ILMN_1766654	568	157	13528	1.3653	1	0.956615	99.9312
GOTERM_BP_FAT	GO:0006869~lipid transport	8	1.02041	0.406401	ILMN_1735798, ILMN_1802690, ILMN_1773063, ILMN_1669497, ILMN_1814719, ILMN_1673521, ILMN_1705231, ILMN_1766654	568	145	13528	1.31404	1	0.972805	99.9902
GOTERM_BP_FAT	GO:0008202~steroid metabolic process	10	1.27551	0.474095	ILMN_1735798, ILMN_1697433, ILMN_1668035, ILMN_1773063, ILMN_1669497, ILMN_1692163, ILMN_1720889, ILMN_1797728, ILMN_1721559, ILMN_1766654	568	202	13528	1.17905	1	0.982761	99.9989
Annotation Cluster 52	Enrichment Score: 1.3869080509677998
Category	Term	Count	%	PValue	Genes	List Total	Pop Hits	Pop Total	Fold Enrichment	Bonferroni	Benjamini	FDR
GOTERM_BP_FAT	GO:0031346~positive regulation of cell projection organization	7	0.892857	0.013166	ILMN_1734742, ILMN_1810559, ILMN_1676449, ILMN_1776708, ILMN_1769891, ILMN_1659086, ILMN_1733421	568	47	13528	3.5472	1	0.246009	20.9129
GOTERM_BP_FAT	GO:0050772~positive regulation of axonogenesis	5	0.637755	0.0191736	ILMN_1734742, ILMN_1676449, ILMN_1776708, ILMN_1769891, ILMN_1659086	568	25	13528	4.76338	1	0.316815	29.0164
GOTERM_BP_FAT	GO:0010720~positive regulation of cell development	8	1.02041	0.0250719	ILMN_1734742, ILMN_1685078, ILMN_1676449, ILMN_1776708, ILMN_1769891, ILMN_1659086, ILMN_1682738, ILMN_1736096	568	69	13528	2.76138	1	0.375579	36.2051
GOTERM_BP_FAT	GO:0050769~positive regulation of neurogenesis	7	0.892857	0.0364021	ILMN_1734742, ILMN_1685078, ILMN_1676449, ILMN_1776708, ILMN_1769891, ILMN_1659086, ILMN_1736096	568	59	13528	2.82573	1	0.460301	48.1303
GOTERM_BP_FAT	GO:0051094~positive regulation of developmental process	17	2.16837	0.124656	ILMN_1750181, ILMN_1792409, ILMN_1685078, ILMN_1776708, ILMN_1769891, ILMN_1659086, ILMN_1682738, ILMN_1653751, ILMN_1736096, ILMN_1734742, ILMN_1808587, ILMN_1771800, ILMN_1759598, ILMN_1690125, ILMN_1676449, ILMN_1690807, ILMN_1722809	568	278	13528	1.45643	1	0.770783	90.5286
GOTERM_BP_FAT	GO:0045597~positive regulation of cell differentiation	14	1.78571	0.1661	ILMN_1750181, ILMN_1685078, ILMN_1769891, ILMN_1776708, ILMN_1659086, ILMN_1682738, ILMN_1653751, ILMN_1736096, ILMN_1734742, ILMN_1808587, ILMN_1759598, ILMN_1690125, ILMN_1676449, ILMN_1722809	568	229	13528	1.45606	1	0.847503	95.9866
Annotation Cluster 53	Enrichment Score: 1.3642655523368776
Category	Term	Count	%	PValue	Genes	List Total	Pop Hits	Pop Total	Fold Enrichment	Bonferroni	Benjamini	FDR
GOTERM_BP_FAT	GO:0021953~central nervous system neuron differentiation	7	0.892857	0.00601745	ILMN_1771800, ILMN_1665761, ILMN_1754375, ILMN_1715189, ILMN_1724162, ILMN_1676422, ILMN_1756755	568	40	13528	4.16796	1	0.1556	10.1337
GOTERM_BP_FAT	GO:0021954~central nervous system neuron development	6	0.765306	0.0100166	ILMN_1771800, ILMN_1754375, ILMN_1715189, ILMN_1724162, ILMN_1676422, ILMN_1756755	568	32	13528	4.46567	1	0.206834	16.3237
GOTERM_BP_FAT	GO:0021537~telencephalon development	8	1.02041	0.0186411	ILMN_1754375, ILMN_1715189, ILMN_1724162, ILMN_1725772, ILMN_1680184, ILMN_1672094, ILMN_1785380, ILMN_1807016	568	65	13528	2.93131	1	0.313432	28.331
GOTERM_BP_FAT	GO:0021795~cerebral cortex cell migration	4	0.510204	0.0188712	ILMN_1754375, ILMN_1715189, ILMN_1724162, ILMN_1725772	568	14	13528	6.80483	1	0.314637	28.6279
GOTERM_BP_FAT	GO:0022029~telencephalon cell migration	4	0.510204	0.027289	ILMN_1754375, ILMN_1715189, ILMN_1724162, ILMN_1725772	568	16	13528	5.95423	1	0.397024	38.7253
GOTERM_BP_FAT	GO:0021885~forebrain cell migration	4	0.510204	0.0321298	ILMN_1754375, ILMN_1715189, ILMN_1724162, ILMN_1725772	568	17	13528	5.60398	1	0.436013	43.9049
GOTERM_BP_FAT	GO:0021799~cerebral cortex radially oriented cell migration	3	0.382653	0.0415137	ILMN_1754375, ILMN_1715189, ILMN_1725772	568	8	13528	8.93134	1	0.486501	52.7914
GOTERM_BP_FAT	GO:0021543~pallium development	6	0.765306	0.0424005	ILMN_1754375, ILMN_1715189, ILMN_1724162, ILMN_1725772, ILMN_1680184, ILMN_1672094	568	46	13528	3.10655	1	0.489749	53.5586
GOTERM_BP_FAT	GO:0021987~cerebral cortex development	5	0.637755	0.0477847	ILMN_1754375, ILMN_1715189, ILMN_1724162, ILMN_1725772, ILMN_1680184	568	33	13528	3.60862	1	0.522019	57.9704
GOTERM_BP_FAT	GO:0030900~forebrain development	11	1.40306	0.105982	ILMN_1754375, ILMN_1715189, ILMN_1724162, ILMN_1725772, ILMN_1680184, ILMN_1672094, ILMN_1750706, ILMN_1710859, ILMN_1763834, ILMN_1785380, ILMN_1807016	568	152	13528	1.72359	1	0.727728	86.2374
GOTERM_BP_FAT	GO:0021761~limbic system development	3	0.382653	0.390381	ILMN_1754375, ILMN_1725772, ILMN_1672094	568	32	13528	2.23283	1	0.96938	99.9843
UP_SEQ_FEATURE	DNA-binding region:Homeobox	8	1.02041	0.657569	ILMN_1759598, ILMN_1715189, ILMN_1724162, ILMN_1725772, ILMN_1680184, ILMN_1672094, ILMN_1738657, ILMN_1807016	778	190	19113	1.03439	1	0.999998	100
Annotation Cluster 54	Enrichment Score: 1.360372029468901
Category	Term	Count	%	PValue	Genes	List Total	Pop Hits	Pop Total	Fold Enrichment	Bonferroni	Benjamini	FDR
GOTERM_CC_FAT	GO:0033267~axon part	8	1.02041	0.0106243	ILMN_1672660, ILMN_1740508, ILMN_1712943, ILMN_1751689, ILMN_1740250, ILMN_1710410, ILMN_1710859, ILMN_1785380	581	54	12782	3.25926	0.978618	0.1203	13.6443
GOTERM_CC_FAT	GO:0043679~nerve terminal	6	0.765306	0.0248154	ILMN_1740508, ILMN_1712943, ILMN_1751689, ILMN_1740250, ILMN_1710410, ILMN_1710859	581	37	12782	3.56757	0.999882	0.216899	29.1862
GOTERM_CC_FAT	GO:0043195~terminal button	3	0.382653	0.314674	ILMN_1740508, ILMN_1712943, ILMN_1740250	581	25	12782	2.64	1	0.790611	99.4426
Annotation Cluster 55	Enrichment Score: 1.3470591344274585
Category	Term	Count	%	PValue	Genes	List Total	Pop Hits	Pop Total	Fold Enrichment	Bonferroni	Benjamini	FDR
SP_PIR_KEYWORDS	neurotransmitter receptor	8	1.02041	0.0078017	ILMN_1715496, ILMN_1751689, ILMN_1808258, ILMN_1651817, ILMN_1707571, ILMN_1767145, ILMN_1710410, ILMN_1689043	778	57	19235	3.46999	0.974208	0.0992298	10.5692
GOTERM_BP_FAT	GO:0050805~negative regulation of synaptic transmission	4	0.510204	0.0555868	ILMN_1718198, ILMN_1715496, ILMN_1651817, ILMN_1689043	568	21	13528	4.53655	1	0.563214	63.6669
GOTERM_BP_FAT	GO:0051970~negative regulation of transmission of nerve impulse	4	0.510204	0.0851328	ILMN_1718198, ILMN_1715496, ILMN_1651817, ILMN_1689043	568	25	13528	3.8107	1	0.666302	79.3017
GOTERM_BP_FAT	GO:0031645~negative regulation of neurological system process	4	0.510204	0.110791	ILMN_1718198, ILMN_1715496, ILMN_1651817, ILMN_1689043	568	28	13528	3.40241	1	0.739567	87.4908
Annotation Cluster 56	Enrichment Score: 1.3258130312458563
Category	Term	Count	%	PValue	Genes	List Total	Pop Hits	Pop Total	Fold Enrichment	Bonferroni	Benjamini	FDR
GOTERM_BP_FAT	GO:0032103~positive regulation of response to external stimulus	9	1.14796	0.00507602	ILMN_1771800, ILMN_1718198, ILMN_1654072, ILMN_1766925, ILMN_1676449, ILMN_1703178, ILMN_1790270, ILMN_1682738, ILMN_1731062	568	64	13528	3.34925	0.999998	0.137058	8.61491
GOTERM_BP_FAT	GO:0050727~regulation of inflammatory response	8	1.02041	0.0396944	ILMN_1771800, ILMN_1718198, ILMN_1749662, ILMN_1654072, ILMN_1685078, ILMN_1697220, ILMN_1790270, ILMN_1671766	568	76	13528	2.50704	1	0.473026	51.1797
GOTERM_BP_FAT	GO:0050729~positive regulation of inflammatory response	4	0.510204	0.129337	ILMN_1771800, ILMN_1718198, ILMN_1654072, ILMN_1790270	568	30	13528	3.17559	1	0.778327	91.3863
GOTERM_BP_FAT	GO:0031349~positive regulation of defense response	6	0.765306	0.190886	ILMN_1771800, ILMN_1724863, ILMN_1718198, ILMN_1758939, ILMN_1654072, ILMN_1790270	568	73	13528	1.95755	1	0.873613	97.6475
Annotation Cluster 57	Enrichment Score: 1.3240912827373283
Category	Term	Count	%	PValue	Genes	List Total	Pop Hits	Pop Total	Fold Enrichment	Bonferroni	Benjamini	FDR
GOTERM_CC_FAT	GO:0042734~presynaptic membrane	7	0.892857	0.00165287	ILMN_1740508, ILMN_1666445, ILMN_1651817, ILMN_1693604, ILMN_1769195, ILMN_1729212, ILMN_1785380	581	29	12782	5.31034	0.448728	0.0344245	2.24633
GOTERM_MF_FAT	GO:0008066~glutamate receptor activity	4	0.510204	0.14612	ILMN_1758400, ILMN_1651817, ILMN_1693604, ILMN_1729212	558	31	12983	3.0022	1	0.854718	91.1711
INTERPRO	IPR001828:Extracellular ligand-binding receptor	3	0.382653	0.441345	ILMN_1651817, ILMN_1693604, ILMN_1729212	689	36	16659	2.01488	1	0.995292	99.9908
Annotation Cluster 58	Enrichment Score: 1.2809072932036636
Category	Term	Count	%	PValue	Genes	List Total	Pop Hits	Pop Total	Fold Enrichment	Bonferroni	Benjamini	FDR
GOTERM_BP_FAT	GO:0043279~response to alkaloid	8	1.02041	0.00701881	ILMN_1754375, ILMN_1746027, ILMN_1679754, ILMN_1790270, ILMN_1767145, ILMN_1693604, ILMN_1710859, ILMN_1689043	568	54	13528	3.52843	1	0.170721	11.7229
GOTERM_BP_FAT	GO:0043278~response to morphine	3	0.382653	0.143056	ILMN_1679754, ILMN_1790270, ILMN_1710859	568	16	13528	4.46567	1	0.808229	93.4976
GOTERM_BP_FAT	GO:0014072~response to isoquinoline alkaloid	3	0.382653	0.143056	ILMN_1679754, ILMN_1790270, ILMN_1710859	568	16	13528	4.46567	1	0.808229	93.4976
Annotation Cluster 59	Enrichment Score: 1.2538192747115624
Category	Term	Count	%	PValue	Genes	List Total	Pop Hits	Pop Total	Fold Enrichment	Bonferroni	Benjamini	FDR
UP_SEQ_FEATURE	domain:ADF-H	3	0.382653	0.0392659	ILMN_1711617, ILMN_1698307, ILMN_1769926	778	8	19113	9.21256	1	0.776026	49.8122
INTERPRO	IPR002108:Actin-binding, cofilin/tropomyosin type	3	0.382653	0.0615134	ILMN_1711617, ILMN_1698307, ILMN_1769926	689	10	16659	7.25356	1	0.70168	63.7096
SMART	SM00102:ADF	3	0.382653	0.0717063	ILMN_1711617, ILMN_1698307, ILMN_1769926	410	10	9079	6.64317	1	0.501197	61.0796
Annotation Cluster 60	Enrichment Score: 1.2530606216811477
Category	Term	Count	%	PValue	Genes	List Total	Pop Hits	Pop Total	Fold Enrichment	Bonferroni	Benjamini	FDR
PUBMED_ID	16780588	8	1.02041	0.000505382	ILMN_1673518, ILMN_1652512, ILMN_1684571, ILMN_1790508, ILMN_1745578, ILMN_1764964, ILMN_1662358, ILMN_1796925	783	50	27491	5.61757	0.999115	0.263345	1.05989
CHROMOSOME	21	11	1.40306	0.523669	ILMN_1707339, ILMN_1690304, ILMN_1673518, ILMN_1652512, ILMN_1651817, ILMN_1684571, ILMN_1745578, ILMN_1749962, ILMN_1764964, ILMN_1662358, ILMN_1796925	784	539	43203	1.12461	1	0.758644	99.7201
PUBMED_ID	10830953	8	1.02041	0.657873	ILMN_1707339, ILMN_1673518, ILMN_1652512, ILMN_1651817, ILMN_1745578, ILMN_1749962, ILMN_1764964, ILMN_1662358	783	272	27491	1.03264	1	1	100
Annotation Cluster 61	Enrichment Score: 1.2469786483417775
Category	Term	Count	%	PValue	Genes	List Total	Pop Hits	Pop Total	Fold Enrichment	Bonferroni	Benjamini	FDR
INTERPRO	IPR013320:Concanavalin A-like lectin/glucanase, subgroup	10	1.27551	0.00436047	ILMN_1762825, ILMN_1731237, ILMN_1676449, ILMN_1685608, ILMN_1756959, ILMN_1690223, ILMN_1711208, ILMN_1723978, ILMN_1770454, ILMN_1736078	689	77	16659	3.14007	0.991312	0.186444	6.73924
INTERPRO	IPR003645:Follistatin-like, N-terminal	4	0.510204	0.00902497	ILMN_1795251, ILMN_1676449, ILMN_1756959, ILMN_1770454	689	11	16659	8.79219	0.999947	0.272107	13.4757
UP_SEQ_FEATURE	domain:EGF-like 1	12	1.53061	0.00975599	ILMN_1786966, ILMN_1709750, ILMN_1745817, ILMN_1676449, ILMN_1665219, ILMN_1756959, ILMN_1690223, ILMN_1669898, ILMN_1770454, ILMN_1671766, ILMN_1736078, ILMN_1736096	778	120	19113	2.45668	1	0.450763	15.526
INTERPRO	IPR001791:Laminin G	7	0.892857	0.0100288	ILMN_1745817, ILMN_1676449, ILMN_1789507, ILMN_1756959, ILMN_1690223, ILMN_1711208, ILMN_1770454	689	45	16659	3.7611	0.999982	0.289703	14.8646
SMART	SM00274:FOLN	4	0.510204	0.0114257	ILMN_1795251, ILMN_1676449, ILMN_1756959, ILMN_1770454	410	11	9079	8.05233	0.915471	0.201169	13.5616
SMART	SM00282:LamG	7	0.892857	0.0148127	ILMN_1745817, ILMN_1676449, ILMN_1789507, ILMN_1756959, ILMN_1690223, ILMN_1711208, ILMN_1770454	410	45	9079	3.44461	0.959585	0.234617	17.2432
UP_SEQ_FEATURE	domain:EGF-like 4	6	0.765306	0.0861689	ILMN_1745817, ILMN_1676449, ILMN_1756959, ILMN_1770454, ILMN_1736078, ILMN_1736096	778	58	19113	2.5414	1	0.922685	78.7922
INTERPRO	IPR012680:Laminin G, subdomain 2	5	0.637755	0.0940283	ILMN_1676449, ILMN_1789507, ILMN_1756959, ILMN_1690223, ILMN_1711208	689	42	16659	2.8784	1	0.803057	79.3319
UP_SEQ_FEATURE	domain:EGF-like 2	7	0.892857	0.148251	ILMN_1786966, ILMN_1676449, ILMN_1756959, ILMN_1690223, ILMN_1770454, ILMN_1671766, ILMN_1736096	778	88	19113	1.95418	1	0.982502	93.681
INTERPRO	IPR000152:EGF-type aspartate/asparagine hydroxylation conserved site	7	0.892857	0.21199	ILMN_1709750, ILMN_1745817, ILMN_1676449, ILMN_1665219, ILMN_1756959, ILMN_1711208, ILMN_1669898	689	97	16659	1.74484	1	0.941763	97.7713
UP_SEQ_FEATURE	domain:Laminin G-like 2	3	0.382653	0.331101	ILMN_1690223, ILMN_1711208, ILMN_1770454	778	29	19113	2.5414	1	0.998904	99.9013
UP_SEQ_FEATURE	domain:Laminin G-like 1	3	0.382653	0.331101	ILMN_1690223, ILMN_1711208, ILMN_1770454	778	29	19113	2.5414	1	0.998904	99.9013
UP_SEQ_FEATURE	domain:EGF-like 3	5	0.637755	0.36394	ILMN_1745817, ILMN_1665219, ILMN_1756959, ILMN_1770454, ILMN_1736096	778	75	19113	1.63779	1	0.999401	99.9585
UP_SEQ_FEATURE	domain:EGF-like 6	3	0.382653	0.526511	ILMN_1676449, ILMN_1756959, ILMN_1736096	778	43	19113	1.71397	1	0.99996	99.9997
Annotation Cluster 62	Enrichment Score: 1.1915301451280755
Category	Term	Count	%	PValue	Genes	List Total	Pop Hits	Pop Total	Fold Enrichment	Bonferroni	Benjamini	FDR
UP_SEQ_FEATURE	domain:C2 1	8	1.02041	0.0073258	ILMN_1793517, ILMN_1810550, ILMN_1814770, ILMN_1682929, ILMN_1722294, ILMN_1806500, ILMN_1657760, ILMN_1755571	778	56	19113	3.50955	1	0.380228	11.8863
UP_SEQ_FEATURE	domain:C2 2	8	1.02041	0.0073258	ILMN_1793517, ILMN_1810550, ILMN_1814770, ILMN_1682929, ILMN_1722294, ILMN_1806500, ILMN_1657760, ILMN_1755571	778	56	19113	3.50955	1	0.380228	11.8863
PUBMED_ID	9430674	3	0.382653	0.0154327	ILMN_1814770, ILMN_1722294, ILMN_1806500	783	7	27491	15.0471	1	0.98438	27.9519
INTERPRO	IPR010734:Copine	3	0.382653	0.0505646	ILMN_1814770, ILMN_1722294, ILMN_1806500	689	9	16659	8.05951	1	0.668757	56.3266
UP_SEQ_FEATURE	domain:VWFA	5	0.637755	0.244433	ILMN_1814770, ILMN_1764769, ILMN_1722294, ILMN_1682996, ILMN_1806500, ILMN_1754076	778	62	19113	1.9812	1	0.995867	99.1964
INTERPRO	IPR002035:von Willebrand factor, type A	4	0.510204	0.639044	ILMN_1814770, ILMN_1722294, ILMN_1806500, ILMN_1754076	689	79	16659	1.22423	1	0.999786	100
SMART	SM00327:VWA	4	0.510204	0.69759	ILMN_1814770, ILMN_1722294, ILMN_1806500, ILMN_1754076	410	79	9079	1.12121	1	0.987199	100
Annotation Cluster 63	Enrichment Score: 1.171564333837928
Category	Term	Count	%	PValue	Genes	List Total	Pop Hits	Pop Total	Fold Enrichment	Bonferroni	Benjamini	FDR
GOTERM_BP_FAT	GO:0045161~neuronal ion channel clustering	3	0.382653	0.0235103	ILMN_1703006, ILMN_1770454, ILMN_1722809	568	6	13528	11.9085	1	0.362996	34.3718
GOTERM_BP_FAT	GO:0042551~neuron maturation	4	0.510204	0.037387	ILMN_1703006, ILMN_1651838, ILMN_1770454, ILMN_1722809	568	18	13528	5.29264	1	0.465102	49.0609
GOTERM_BP_FAT	GO:0048469~cell maturation	7	0.892857	0.0940802	ILMN_1796589, ILMN_1740508, ILMN_1703006, ILMN_1715189, ILMN_1651838, ILMN_1770454, ILMN_1722809	568	75	13528	2.22291	1	0.694173	82.607
GOTERM_BP_FAT	GO:0021700~developmental maturation	7	0.892857	0.249039	ILMN_1796589, ILMN_1740508, ILMN_1703006, ILMN_1715189, ILMN_1651838, ILMN_1770454, ILMN_1722809	568	101	13528	1.65068	1	0.916758	99.3718
Annotation Cluster 64	Enrichment Score: 1.1677894122190053
Category	Term	Count	%	PValue	Genes	List Total	Pop Hits	Pop Total	Fold Enrichment	Bonferroni	Benjamini	FDR
SP_PIR_KEYWORDS	cytoplasmic vesicle	21	2.67857	0.00164638	ILMN_1737162, ILMN_1731206, ILMN_1674580, ILMN_1676609, ILMN_1757497, ILMN_1808136, ILMN_1712806, ILMN_1662927, ILMN_1810782, ILMN_1669355, ILMN_1667381, ILMN_1767842, ILMN_1666904, ILMN_1808501, ILMN_1805807, ILMN_1710859, ILMN_1771622, ILMN_1695003, ILMN_1724350, ILMN_1752299, ILMN_1727479, ILMN_1737611, ILMN_1654468, ILMN_1657760, ILMN_1755571	778	238	19235	2.1815	0.536751	0.0271076	2.32262
GOTERM_CC_FAT	GO:0008021~synaptic vesicle	10	1.27551	0.00726655	ILMN_1737162, ILMN_1727479, ILMN_1805807, ILMN_1808136, ILMN_1757081, ILMN_1767842, ILMN_1657760, ILMN_1666904, ILMN_1755571, ILMN_1799878	581	76	12782	2.89474	0.927597	0.0996938	9.53106
GOTERM_CC_FAT	GO:0030136~clathrin-coated vesicle	13	1.65816	0.0168164	ILMN_1737162, ILMN_1805807, ILMN_1808136, ILMN_1707077, ILMN_1712806, ILMN_1662927, ILMN_1727479, ILMN_1747979, ILMN_1767842, ILMN_1757081, ILMN_1666904, ILMN_1657760, ILMN_1799878, ILMN_1755571	581	132	12782	2.16667	0.997769	0.168905	20.7784
GOTERM_CC_FAT	GO:0030135~coated vesicle	13	1.65816	0.0580498	ILMN_1737162, ILMN_1805807, ILMN_1808136, ILMN_1707077, ILMN_1712806, ILMN_1662927, ILMN_1727479, ILMN_1747979, ILMN_1767842, ILMN_1757081, ILMN_1666904, ILMN_1657760, ILMN_1799878, ILMN_1755571	581	159	12782	1.79874	1	0.367493	56.0156
GOTERM_CC_FAT	GO:0030659~cytoplasmic vesicle membrane	11	1.40306	0.100548	ILMN_1662927, ILMN_1658835, ILMN_1699692, ILMN_1666445, ILMN_1757497, ILMN_1747979, ILMN_1768758, ILMN_1757081, ILMN_1767842, ILMN_1666904, ILMN_1809695, ILMN_1712806	581	139	12782	1.74101	1	0.500235	76.6691
GOTERM_CC_FAT	GO:0012506~vesicle membrane	11	1.40306	0.14865	ILMN_1662927, ILMN_1658835, ILMN_1699692, ILMN_1666445, ILMN_1757497, ILMN_1747979, ILMN_1768758, ILMN_1757081, ILMN_1767842, ILMN_1666904, ILMN_1809695, ILMN_1712806	581	151	12782	1.60265	1	0.595557	89.0327
GOTERM_CC_FAT	GO:0030665~clathrin coated vesicle membrane	5	0.637755	0.219058	ILMN_1662927, ILMN_1747979, ILMN_1757081, ILMN_1767842, ILMN_1666904, ILMN_1712806	581	53	12782	2.07547	1	0.694811	96.6487
GOTERM_CC_FAT	GO:0030672~synaptic vesicle membrane	3	0.382653	0.280609	ILMN_1757081, ILMN_1767842, ILMN_1666904	581	23	12782	2.86957	1	0.764472	98.9147
GOTERM_CC_FAT	GO:0030662~coated vesicle membrane	5	0.637755	0.424171	ILMN_1662927, ILMN_1747979, ILMN_1757081, ILMN_1767842, ILMN_1666904, ILMN_1712806	581	73	12782	1.50685	1	0.860169	99.949
GOTERM_BP_FAT	GO:0006836~neurotransmitter transport	5	0.637755	0.461291	ILMN_1810550, ILMN_1693604, ILMN_1757081, ILMN_1767842, ILMN_1666904	568	83	13528	1.43475	1	0.981808	99.9982
Annotation Cluster 65	Enrichment Score: 1.1561012515104778
Category	Term	Count	%	PValue	Genes	List Total	Pop Hits	Pop Total	Fold Enrichment	Bonferroni	Benjamini	FDR
GOTERM_BP_FAT	GO:0006940~regulation of smooth muscle contraction	6	0.765306	0.0203465	ILMN_1808590, ILMN_1740508, ILMN_1708275, ILMN_1668236, ILMN_1740250, ILMN_1710410	568	38	13528	3.76056	1	0.328642	30.5041
GOTERM_BP_FAT	GO:0006937~regulation of muscle contraction	8	1.02041	0.0307915	ILMN_1771800, ILMN_1808590, ILMN_1740508, ILMN_1660775, ILMN_1708275, ILMN_1668236, ILMN_1740250, ILMN_1710410	568	72	13528	2.64632	1	0.430976	42.5158
GOTERM_BP_FAT	GO:0045987~positive regulation of smooth muscle contraction	3	0.382653	0.172904	ILMN_1708275, ILMN_1740250, ILMN_1710410	568	18	13528	3.96948	1	0.855483	96.5285
GOTERM_BP_FAT	GO:0045933~positive regulation of muscle contraction	3	0.382653	0.219215	ILMN_1708275, ILMN_1740250, ILMN_1710410	568	21	13528	3.40241	1	0.895878	98.7482
Annotation Cluster 66	Enrichment Score: 1.148599609174934
Category	Term	Count	%	PValue	Genes	List Total	Pop Hits	Pop Total	Fold Enrichment	Bonferroni	Benjamini	FDR
GOTERM_BP_FAT	GO:0034330~cell junction organization	9	1.14796	0.00244593	ILMN_1654422, ILMN_1779875, ILMN_1792409, ILMN_1798892, ILMN_1681777, ILMN_1700042, ILMN_1810962, ILMN_1682738, ILMN_1796925	568	57	13528	3.76056	0.998188	0.0732433	4.24263
GOTERM_BP_FAT	GO:0048041~focal adhesion formation	4	0.510204	0.027289	ILMN_1654422, ILMN_1779875, ILMN_1798892, ILMN_1810962	568	16	13528	5.95423	1	0.397024	38.7253
GOTERM_BP_FAT	GO:0034329~cell junction assembly	6	0.765306	0.027439	ILMN_1654422, ILMN_1779875, ILMN_1792409, ILMN_1798892, ILMN_1700042, ILMN_1810962	568	41	13528	3.4854	1	0.396563	38.8922
GOTERM_MF_FAT	GO:0005178~integrin binding	7	0.892857	0.0400631	ILMN_1654422, ILMN_1779875, ILMN_1798892, ILMN_1663112, ILMN_1801205, ILMN_1665219, ILMN_1670054	558	59	12983	2.76049	1	0.53532	46.6472
GOTERM_BP_FAT	GO:0007044~cell-substrate junction assembly	4	0.510204	0.069646	ILMN_1654422, ILMN_1779875, ILMN_1798892, ILMN_1810962	568	23	13528	4.14207	1	0.614953	72.1394
GOTERM_BP_FAT	GO:0051271~negative regulation of cell motion	6	0.765306	0.12364	ILMN_1779875, ILMN_1798892, ILMN_1810962, ILMN_1673521, ILMN_1669898, ILMN_1689043	568	63	13528	2.26828	1	0.76928	90.3322
KEGG_PATHWAY	hsa04670:Leukocyte transendothelial migration	8	1.02041	0.238105	ILMN_1654422, ILMN_1771800, ILMN_1728650, ILMN_1779875, ILMN_1795937, ILMN_1798892, ILMN_1806908, ILMN_1796901, ILMN_1716563	218	118	5085	1.5814	1	0.837503	96.0685
GOTERM_BP_FAT	GO:0007160~cell-matrix adhesion	5	0.637755	0.515874	ILMN_1654422, ILMN_1754375, ILMN_1779875, ILMN_1798892, ILMN_1810962	568	89	13528	1.33803	1	0.987598	99.9997
GOTERM_BP_FAT	GO:0031589~cell-substrate adhesion	5	0.637755	0.592506	ILMN_1654422, ILMN_1754375, ILMN_1779875, ILMN_1798892, ILMN_1810962	568	98	13528	1.21515	1	0.993032	100
Annotation Cluster 67	Enrichment Score: 1.1413891064927486
Category	Term	Count	%	PValue	Genes	List Total	Pop Hits	Pop Total	Fold Enrichment	Bonferroni	Benjamini	FDR
UP_SEQ_FEATURE	region of interest:Catalytic	7	0.892857	0.0153617	ILMN_1806533, ILMN_1681356, ILMN_1695003, ILMN_1805098, ILMN_1652017, ILMN_1659197, ILMN_1710859	778	50	19113	3.43936	1	0.560321	23.389
GOTERM_MF_FAT	GO:0008081~phosphoric diester hydrolase activity	9	1.14796	0.0273888	ILMN_1806533, ILMN_1681356, ILMN_1751689, ILMN_1805098, ILMN_1659197, ILMN_1666976, ILMN_1724066, ILMN_1710410, ILMN_1723969	558	84	12983	2.4929	1	0.463	34.7342
INTERPRO	IPR002073:3'5'-cyclic nucleotide phosphodiesterase	4	0.510204	0.0536401	ILMN_1806533, ILMN_1681356, ILMN_1805098, ILMN_1659197	689	21	16659	4.60543	1	0.683812	58.5313
INTERPRO	IPR003607:Metal-dependent phosphohydrolase, HD region	4	0.510204	0.0746053	ILMN_1806533, ILMN_1681356, ILMN_1805098, ILMN_1659197	689	24	16659	4.02975	1	0.748516	71.001
GOTERM_MF_FAT	GO:0004114~3',5'-cyclic-nucleotide phosphodiesterase activity	4	0.510204	0.0815582	ILMN_1806533, ILMN_1681356, ILMN_1805098, ILMN_1659197	558	24	12983	3.87784	1	0.725776	72.9427
GOTERM_MF_FAT	GO:0004112~cyclic-nucleotide phosphodiesterase activity	4	0.510204	0.0898569	ILMN_1806533, ILMN_1681356, ILMN_1805098, ILMN_1659197	558	25	12983	3.72272	1	0.754713	76.4649
SMART	SM00471:HDc	4	0.510204	0.0912858	ILMN_1806533, ILMN_1681356, ILMN_1805098, ILMN_1659197	410	24	9079	3.69065	1	0.546867	70.2995
UP_SEQ_FEATURE	metal ion-binding site:Divalent metal cation 1	4	0.510204	0.103489	ILMN_1806533, ILMN_1681356, ILMN_1805098, ILMN_1659197	778	28	19113	3.50955	1	0.949089	84.743
UP_SEQ_FEATURE	metal ion-binding site:Divalent metal cation 2	4	0.510204	0.103489	ILMN_1806533, ILMN_1681356, ILMN_1805098, ILMN_1659197	778	28	19113	3.50955	1	0.949089	84.743
SP_PIR_KEYWORDS	camp	4	0.510204	0.137631	ILMN_1806533, ILMN_1681356, ILMN_1805098, ILMN_1659197	778	32	19235	3.09046	1	0.632917	87.8982
UP_SEQ_FEATURE	active site:Proton donor	12	1.53061	0.167695	ILMN_1806533, ILMN_1681356, ILMN_1805098, ILMN_1652017, ILMN_1659197, ILMN_1793636, ILMN_1755123, ILMN_1736042, ILMN_1682757, ILMN_1802456, ILMN_1719498, ILMN_1756049	778	194	19113	1.5196	1	0.987166	95.7534
Annotation Cluster 68	Enrichment Score: 1.12463479698608
Category	Term	Count	%	PValue	Genes	List Total	Pop Hits	Pop Total	Fold Enrichment	Bonferroni	Benjamini	FDR
GOTERM_BP_FAT	GO:0051495~positive regulation of cytoskeleton organization	8	1.02041	0.0024851	ILMN_1658835, ILMN_1792409, ILMN_1790270, ILMN_1682738, ILMN_1673521, ILMN_1733421, ILMN_1735735, ILMN_1671843	568	45	13528	4.23412	0.998362	0.0735209	4.30916
GOTERM_BP_FAT	GO:0010638~positive regulation of organelle organization	8	1.02041	0.0589959	ILMN_1658835, ILMN_1792409, ILMN_1790270, ILMN_1682738, ILMN_1673521, ILMN_1733421, ILMN_1735735, ILMN_1671843	568	83	13528	2.2956	1	0.577401	65.92
GOTERM_BP_FAT	GO:0031112~positive regulation of microtubule polymerization or depolymerization	3	0.382653	0.10083	ILMN_1658835, ILMN_1735735, ILMN_1671843	568	13	13528	5.49621	1	0.715457	84.7638
GOTERM_BP_FAT	GO:0031110~regulation of microtubule polymerization or depolymerization	4	0.510204	0.138994	ILMN_1658835, ILMN_1772366, ILMN_1735735, ILMN_1671843	568	31	13528	3.07315	1	0.802306	92.9297
GOTERM_BP_FAT	GO:0070507~regulation of microtubule cytoskeleton organization	4	0.510204	0.257239	ILMN_1658835, ILMN_1772366, ILMN_1735735, ILMN_1671843	568	42	13528	2.26828	1	0.922346	99.4828
GOTERM_BP_FAT	GO:0032886~regulation of microtubule-based process	4	0.510204	0.338146	ILMN_1658835, ILMN_1772366, ILMN_1735735, ILMN_1671843	568	49	13528	1.94424	1	0.956654	99.9329
Annotation Cluster 69	Enrichment Score: 1.1189938940610489
Category	Term	Count	%	PValue	Genes	List Total	Pop Hits	Pop Total	Fold Enrichment	Bonferroni	Benjamini	FDR
UP_SEQ_FEATURE	metal ion-binding site:Calcium 1	6	0.765306	0.0350314	ILMN_1771800, ILMN_1806908, ILMN_1685608, ILMN_1716563, ILMN_1677746, ILMN_1657760, ILMN_1755571	778	45	19113	3.27558	1	0.769585	45.8662
UP_SEQ_FEATURE	metal ion-binding site:Calcium 1; via carbonyl oxygen	5	0.637755	0.0395218	ILMN_1771800, ILMN_1806908, ILMN_1685608, ILMN_1716563, ILMN_1677746, ILMN_1755571	778	32	19113	3.83857	1	0.772087	50.0418
UP_SEQ_FEATURE	metal ion-binding site:Calcium 2	6	0.765306	0.0720582	ILMN_1771800, ILMN_1806908, ILMN_1685608, ILMN_1716563, ILMN_1677746, ILMN_1657760, ILMN_1755571	778	55	19113	2.68002	1	0.894748	72.3926
UP_SEQ_FEATURE	metal ion-binding site:Calcium 3	4	0.510204	0.121012	ILMN_1771800, ILMN_1806908, ILMN_1716563, ILMN_1657760, ILMN_1755571	778	30	19113	3.27558	1	0.965908	89.1373
UP_SEQ_FEATURE	metal ion-binding site:Calcium 2; via carbonyl oxygen	4	0.510204	0.210487	ILMN_1771800, ILMN_1806908, ILMN_1716563, ILMN_1677746, ILMN_1755571	778	39	19113	2.51968	1	0.99266	98.2879
Annotation Cluster 70	Enrichment Score: 1.109783831815537
Category	Term	Count	%	PValue	Genes	List Total	Pop Hits	Pop Total	Fold Enrichment	Bonferroni	Benjamini	FDR
PUBMED_ID	14699138	4	0.510204	0.00115372	ILMN_1771800, ILMN_1806908, ILMN_1792384, ILMN_1716563, ILMN_1733421	783	8	27491	17.5549	1	0.460664	2.40392
PUBMED_ID	12618484	3	0.382653	0.00466741	ILMN_1771800, ILMN_1806908, ILMN_1716563, ILMN_1733421	783	4	27491	26.3324	1	0.8195	9.39066
PUBMED_ID	10843712	5	0.637755	0.00510586	ILMN_1771800, ILMN_1806908, ILMN_1724066, ILMN_1716563, ILMN_1733421, ILMN_1723969	783	25	27491	7.02197	1	0.838819	10.2283
PUBMED_ID	10433554	3	0.382653	0.0154327	ILMN_1771800, ILMN_1806908, ILMN_1716563, ILMN_1733421	783	7	27491	15.0471	1	0.98438	27.9519
PUBMED_ID	15894802	3	0.382653	0.0201923	ILMN_1771800, ILMN_1806908, ILMN_1716563, ILMN_1733421	783	8	27491	13.1662	1	0.992485	34.948
INTERPRO	IPR002219:Protein kinase C-like, phorbol ester/diacylglycerol binding	8	1.02041	0.020243	ILMN_1771800, ILMN_1728650, ILMN_1709101, ILMN_1732636, ILMN_1806908, ILMN_1678493, ILMN_1716563, ILMN_1733421, ILMN_1653894, ILMN_1752247	689	67	16659	2.88699	1	0.434177	27.8565
PUBMED_ID	12482669	5	0.637755	0.0243079	ILMN_1771800, ILMN_1806908, ILMN_1724066, ILMN_1716563, ILMN_1733421, ILMN_1723969	783	39	27491	4.50126	1	0.995237	40.471
GOTERM_MF_FAT	GO:0019992~diacylglycerol binding	8	1.02041	0.0260844	ILMN_1771800, ILMN_1728650, ILMN_1709101, ILMN_1732636, ILMN_1806908, ILMN_1678493, ILMN_1716563, ILMN_1733421, ILMN_1653894, ILMN_1752247	558	68	12983	2.7373	1	0.45592	33.3763
SP_PIR_KEYWORDS	phorbol ester binding	3	0.382653	0.0298965	ILMN_1771800, ILMN_1806908, ILMN_1716563, ILMN_1733421	778	7	19235	10.5959	0.999999	0.246851	35.1369
SMART	SM00109:C1	8	1.02041	0.0304267	ILMN_1771800, ILMN_1728650, ILMN_1709101, ILMN_1732636, ILMN_1806908, ILMN_1678493, ILMN_1716563, ILMN_1733421, ILMN_1653894, ILMN_1752247	410	67	9079	2.64405	0.998697	0.357821	32.421
PUBMED_ID	2182321	3	0.382653	0.0374915	ILMN_1771800, ILMN_1806908, ILMN_1716563, ILMN_1733421	783	11	27491	9.57541	1	0.999495	55.312
PUBMED_ID	8914829	3	0.382653	0.0374915	ILMN_1771800, ILMN_1806908, ILMN_1716563, ILMN_1733421	783	11	27491	9.57541	1	0.999495	55.312
UP_SEQ_FEATURE	domain:C2	8	1.02041	0.0439116	ILMN_1771800, ILMN_1658619, ILMN_1652512, ILMN_1806908, ILMN_1724066, ILMN_1716563, ILMN_1733421, ILMN_1723969, ILMN_1672878	778	80	19113	2.45668	1	0.795871	53.8292
PUBMED_ID	11919157	3	0.382653	0.0441573	ILMN_1771800, ILMN_1806908, ILMN_1716563, ILMN_1733421	783	12	27491	8.77746	1	0.999769	61.4013
INTERPRO	IPR015745:Protein kinase C	3	0.382653	0.0505646	ILMN_1771800, ILMN_1806908, ILMN_1716563, ILMN_1733421	689	9	16659	8.05951	1	0.668757	56.3266
INTERPRO	IPR002219:Protein kinase C, phorbol ester/diacylglycerol binding	6	0.765306	0.0545029	ILMN_1771800, ILMN_1728650, ILMN_1732636, ILMN_1678493, ILMN_1733421, ILMN_1653894	689	50	16659	2.90142	1	0.682851	59.1309
UP_SEQ_FEATURE	zinc finger region:Phorbol-ester/DAG-type 1	4	0.510204	0.0580228	ILMN_1771800, ILMN_1732636, ILMN_1806908, ILMN_1716563, ILMN_1733421	778	22	19113	4.4667	1	0.861442	64.2538
UP_SEQ_FEATURE	zinc finger region:Phorbol-ester/DAG-type 2	4	0.510204	0.0580228	ILMN_1771800, ILMN_1732636, ILMN_1806908, ILMN_1716563, ILMN_1733421	778	22	19113	4.4667	1	0.861442	64.2538
PUBMED_ID	8627654	3	0.382653	0.0664411	ILMN_1771800, ILMN_1806908, ILMN_1716563, ILMN_1733421	783	15	27491	7.02197	1	0.999983	76.5238
PUBMED_ID	11833470	3	0.382653	0.0745418	ILMN_1771800, ILMN_1806908, ILMN_1716563, ILMN_1733421	783	16	27491	6.58309	1	0.999992	80.4635
PUBMED_ID	17192257	6	0.765306	0.077773	ILMN_1771800, ILMN_1758939, ILMN_1806908, ILMN_1776708, ILMN_1716563, ILMN_1733421, ILMN_1809695	783	80	27491	2.63324	1	0.999994	81.852
PUBMED_ID	11044099	3	0.382653	0.109665	ILMN_1771800, ILMN_1806908, ILMN_1716563, ILMN_1733421	783	20	27491	5.26648	1	1	91.3571
PUBMED_ID	9671211	3	0.382653	0.119017	ILMN_1771800, ILMN_1806908, ILMN_1716563, ILMN_1733421	783	21	27491	5.01569	1	1	93.0818
PUBMED_ID	9446795	3	0.382653	0.119017	ILMN_1771800, ILMN_1806908, ILMN_1716563, ILMN_1733421	783	21	27491	5.01569	1	1	93.0818
PUBMED_ID	11154208	3	0.382653	0.128558	ILMN_1771800, ILMN_1806908, ILMN_1716563, ILMN_1733421	783	22	27491	4.7877	1	1	94.5007
GOTERM_MF_FAT	GO:0004697~protein kinase C activity	3	0.382653	0.133599	ILMN_1771800, ILMN_1806908, ILMN_1716563, ILMN_1733421	558	15	12983	4.65341	1	0.835697	88.9581
KEGG_PATHWAY	hsa04530:Tight junction	9	1.14796	0.212195	ILMN_1654422, ILMN_1771800, ILMN_1805448, ILMN_1798892, ILMN_1806908, ILMN_1796901, ILMN_1716563, ILMN_1733421, ILMN_1660732, ILMN_1669714	218	134	5085	1.56665	1	0.842018	94.1469
SP_PIR_KEYWORDS	phospholipid binding	3	0.382653	0.222445	ILMN_1771800, ILMN_1806908, ILMN_1716563, ILMN_1733421	778	22	19235	3.37141	1	0.778288	97.2356
SP_PIR_KEYWORDS	serine/threonine-specific protein kinase	5	0.637755	0.223482	ILMN_1771800, ILMN_1754375, ILMN_1708340, ILMN_1806908, ILMN_1716563, ILMN_1733421	778	60	19235	2.0603	1	0.775796	97.2878
UP_SEQ_FEATURE	zinc finger region:Phorbol-ester/DAG-type	4	0.510204	0.25398	ILMN_1728650, ILMN_1709101, ILMN_1678493, ILMN_1653894, ILMN_1752247	778	43	19113	2.28529	1	0.996595	99.3543
SP_PIR_KEYWORDS	autophosphorylation	4	0.510204	0.317561	ILMN_1771800, ILMN_1686623, ILMN_1806908, ILMN_1716563, ILMN_1733421	778	49	19235	2.01826	1	0.84714	99.5701
GOTERM_MF_FAT	GO:0008289~lipid binding	22	2.80612	0.371554	ILMN_1779875, ILMN_1793517, ILMN_1709101, ILMN_1732636, ILMN_1722726, ILMN_1708275, ILMN_1682929, ILMN_1806908, ILMN_1814719, ILMN_1724066, ILMN_1740265, ILMN_1653894, ILMN_1752247, ILMN_1788131, ILMN_1659106, ILMN_1766654, ILMN_1771800, ILMN_1728650, ILMN_1773063, ILMN_1786257, ILMN_1678493, ILMN_1733421, ILMN_1716563, ILMN_1721559	558	450	12983	1.1375	1	0.977217	99.9205
INTERPRO	IPR017892:Protein kinase, C-terminal	3	0.382653	0.49628	ILMN_1771800, ILMN_1806908, ILMN_1716563, ILMN_1733421	689	40	16659	1.81339	1	0.997876	99.9982
SP_PIR_KEYWORDS	phosphotransferase	9	1.14796	0.567556	ILMN_1771800, ILMN_1754375, ILMN_1758398, ILMN_1748281, ILMN_1708340, ILMN_1686623, ILMN_1806908, ILMN_1776516, ILMN_1716563, ILMN_1733421	778	201	19235	1.10703	1	0.9596	99.9994
UP_SEQ_FEATURE	domain:AGC-kinase C-terminal	3	0.382653	0.66064	ILMN_1771800, ILMN_1806908, ILMN_1716563, ILMN_1733421	778	55	19113	1.34001	1	0.999998	100
INTERPRO	IPR000961:AGC-kinase, C-terminal	3	0.382653	0.669267	ILMN_1771800, ILMN_1806908, ILMN_1716563, ILMN_1733421	689	55	16659	1.31883	1	0.999881	100
SMART	SM00133:S_TK_X	3	0.382653	0.716075	ILMN_1771800, ILMN_1806908, ILMN_1716563, ILMN_1733421	410	55	9079	1.20785	1	0.989019	100
SP_PIR_KEYWORDS	ATP	7	0.892857	0.918733	ILMN_1771800, ILMN_1754375, ILMN_1748281, ILMN_1708340, ILMN_1686623, ILMN_1806908, ILMN_1716563, ILMN_1733421	778	236	19235	0.733329	1	0.998859	100
Annotation Cluster 71	Enrichment Score: 1.0706154478482852
Category	Term	Count	%	PValue	Genes	List Total	Pop Hits	Pop Total	Fold Enrichment	Bonferroni	Benjamini	FDR
UP_SEQ_FEATURE	domain:SH3 1	6	0.765306	0.0145387	ILMN_1728650, ILMN_1752764, ILMN_1716407, ILMN_1810782, ILMN_1808501, ILMN_1707798, ILMN_1656826	778	36	19113	4.09447	1	0.55981	22.2794
UP_SEQ_FEATURE	domain:SH3 2	6	0.765306	0.016263	ILMN_1728650, ILMN_1752764, ILMN_1716407, ILMN_1810782, ILMN_1808501, ILMN_1707798, ILMN_1656826	778	37	19113	3.98381	1	0.571731	24.587
UP_SEQ_FEATURE	domain:SH3 3	4	0.510204	0.0399109	ILMN_1752764, ILMN_1716407, ILMN_1810782, ILMN_1808501, ILMN_1656826	778	19	19113	5.17197	1	0.769378	50.389
SP_PIR_KEYWORDS	sh3 domain	15	1.91327	0.0461983	ILMN_1657129, ILMN_1809613, ILMN_1752764, ILMN_1808501, ILMN_1722726, ILMN_1659733, ILMN_1803423, ILMN_1707798, ILMN_1763604, ILMN_1656826, ILMN_1698307, ILMN_1690963, ILMN_1728650, ILMN_1810782, ILMN_1716407, ILMN_1736112, ILMN_1666076	778	210	19235	1.76598	1	0.340828	49.0636
INTERPRO	IPR001452:Src homology-3 domain	15	1.91327	0.0588215	ILMN_1657129, ILMN_1809613, ILMN_1752764, ILMN_1808501, ILMN_1722726, ILMN_1659733, ILMN_1803423, ILMN_1707798, ILMN_1763604, ILMN_1656826, ILMN_1698307, ILMN_1690963, ILMN_1728650, ILMN_1810782, ILMN_1716407, ILMN_1736112, ILMN_1666076	689	213	16659	1.70271	1	0.697906	62.0115
SMART	SM00326:SH3	15	1.91327	0.100257	ILMN_1657129, ILMN_1809613, ILMN_1752764, ILMN_1808501, ILMN_1722726, ILMN_1659733, ILMN_1803423, ILMN_1707798, ILMN_1763604, ILMN_1656826, ILMN_1698307, ILMN_1690963, ILMN_1728650, ILMN_1810782, ILMN_1716407, ILMN_1736112, ILMN_1666076	410	213	9079	1.55943	1	0.56883	73.811
INTERPRO	IPR000108:Neutrophil cytosol factor 2	3	0.382653	0.276385	ILMN_1716407, ILMN_1810782, ILMN_1808501, ILMN_1656826	689	25	16659	2.90142	1	0.968072	99.4286
UP_SEQ_FEATURE	domain:SH3	9	1.14796	0.431098	ILMN_1690963, ILMN_1657129, ILMN_1809613, ILMN_1722726, ILMN_1659733, ILMN_1736112, ILMN_1803423, ILMN_1763604, ILMN_1698307, ILMN_1666076	778	177	19113	1.24916	1	0.999795	99.9939
INTERPRO	IPR011511:Variant SH3	3	0.382653	0.755577	ILMN_1728650, ILMN_1752764, ILMN_1707798	689	65	16659	1.11593	1	0.999979	100
Annotation Cluster 72	Enrichment Score: 1.0437052216557687
Category	Term	Count	%	PValue	Genes	List Total	Pop Hits	Pop Total	Fold Enrichment	Bonferroni	Benjamini	FDR
GOTERM_BP_FAT	GO:0003018~vascular process in circulatory system	7	0.892857	0.0338502	ILMN_1808590, ILMN_1658835, ILMN_1740508, ILMN_1792409, ILMN_1749662, ILMN_1679754, ILMN_1689043	568	58	13528	2.87445	1	0.444522	45.644
GOTERM_BP_FAT	GO:0050880~regulation of blood vessel size	6	0.765306	0.0702358	ILMN_1808590, ILMN_1658835, ILMN_1740508, ILMN_1749662, ILMN_1679754, ILMN_1689043	568	53	13528	2.69625	1	0.614417	72.4505
GOTERM_BP_FAT	GO:0035150~regulation of tube size	6	0.765306	0.0702358	ILMN_1808590, ILMN_1658835, ILMN_1740508, ILMN_1749662, ILMN_1679754, ILMN_1689043	568	53	13528	2.69625	1	0.614417	72.4505
GOTERM_BP_FAT	GO:0042311~vasodilation	4	0.510204	0.0933769	ILMN_1808590, ILMN_1658835, ILMN_1740508, ILMN_1749662	568	26	13528	3.66414	1	0.693004	82.3664
GOTERM_BP_FAT	GO:0008217~regulation of blood pressure	8	1.02041	0.126314	ILMN_1808590, ILMN_1708275, ILMN_1679754, ILMN_1790270, ILMN_1731062, ILMN_1669410, ILMN_1799878, ILMN_1689043	568	100	13528	1.90535	1	0.772669	90.8412
GOTERM_BP_FAT	GO:0003013~circulatory system process	12	1.53061	0.158434	ILMN_1808590, ILMN_1658835, ILMN_1740508, ILMN_1792409, ILMN_1749662, ILMN_1708275, ILMN_1679754, ILMN_1790270, ILMN_1731062, ILMN_1669410, ILMN_1799878, ILMN_1689043	568	186	13528	1.53657	1	0.837166	95.2809
GOTERM_BP_FAT	GO:0008015~blood circulation	12	1.53061	0.158434	ILMN_1808590, ILMN_1658835, ILMN_1740508, ILMN_1792409, ILMN_1749662, ILMN_1708275, ILMN_1679754, ILMN_1790270, ILMN_1731062, ILMN_1669410, ILMN_1799878, ILMN_1689043	568	186	13528	1.53657	1	0.837166	95.2809
Annotation Cluster 73	Enrichment Score: 1.0327200581094977
Category	Term	Count	%	PValue	Genes	List Total	Pop Hits	Pop Total	Fold Enrichment	Bonferroni	Benjamini	FDR
GOTERM_BP_FAT	GO:0034655~nucleobase, nucleoside, nucleotide and nucleic acid catabolic process	7	0.892857	0.0338502	ILMN_1810559, ILMN_1724907, ILMN_1659197, ILMN_1804642, ILMN_1697220, ILMN_1749324, ILMN_1669714	568	58	13528	2.87445	1	0.444522	45.644
GOTERM_BP_FAT	GO:0034656~nucleobase, nucleoside and nucleotide catabolic process	7	0.892857	0.0338502	ILMN_1810559, ILMN_1724907, ILMN_1659197, ILMN_1804642, ILMN_1697220, ILMN_1749324, ILMN_1669714	568	58	13528	2.87445	1	0.444522	45.644
GOTERM_BP_FAT	GO:0046700~heterocycle catabolic process	8	1.02041	0.0421569	ILMN_1810559, ILMN_1724907, ILMN_1659197, ILMN_1804642, ILMN_1697220, ILMN_1749324, ILMN_1687501, ILMN_1669714	568	77	13528	2.47448	1	0.489802	53.349
GOTERM_BP_FAT	GO:0044270~nitrogen compound catabolic process	7	0.892857	0.0612341	ILMN_1810559, ILMN_1724907, ILMN_1659197, ILMN_1804642, ILMN_1697220, ILMN_1749324, ILMN_1669714	568	67	13528	2.48833	1	0.587424	67.3269
GOTERM_BP_FAT	GO:0006195~purine nucleotide catabolic process	4	0.510204	0.158995	ILMN_1810559, ILMN_1659197, ILMN_1697220, ILMN_1669714	568	33	13528	2.8869	1	0.837103	95.3363
GOTERM_BP_FAT	GO:0009166~nucleotide catabolic process	5	0.637755	0.164568	ILMN_1810559, ILMN_1659197, ILMN_1804642, ILMN_1697220, ILMN_1669714	568	51	13528	2.33499	1	0.84574	95.8541
GOTERM_BP_FAT	GO:0009154~purine ribonucleotide catabolic process	3	0.382653	0.250631	ILMN_1810559, ILMN_1697220, ILMN_1669714	568	23	13528	3.10655	1	0.917588	99.395
GOTERM_BP_FAT	GO:0009261~ribonucleotide catabolic process	3	0.382653	0.282158	ILMN_1810559, ILMN_1697220, ILMN_1669714	568	25	13528	2.85803	1	0.935943	99.7173
Annotation Cluster 74	Enrichment Score: 1.0308052850880798
Category	Term	Count	%	PValue	Genes	List Total	Pop Hits	Pop Total	Fold Enrichment	Bonferroni	Benjamini	FDR
INTERPRO	IPR013098:Immunoglobulin I-set	15	1.91327	0.00171901	ILMN_1692739, ILMN_1810962, ILMN_1676709, ILMN_1707798, ILMN_1663037, ILMN_1756755, ILMN_1796925, ILMN_1752075, ILMN_1717599, ILMN_1731215, ILMN_1684447, ILMN_1802524, ILMN_1738639, ILMN_1749962, ILMN_1722809	689	138	16659	2.6281	0.845638	0.093659	2.70952
SP_PIR_KEYWORDS	Immunoglobulin domain	30	3.82653	0.01629	ILMN_1678812, ILMN_1765641, ILMN_1779875, ILMN_1765620, ILMN_1702787, ILMN_1686623, ILMN_1700328, ILMN_1676709, ILMN_1707798, ILMN_1756755, ILMN_1727633, ILMN_1752075, ILMN_1807981, ILMN_1802524, ILMN_1715927, ILMN_1749962, ILMN_1722809, ILMN_1753502, ILMN_1715013, ILMN_1692739, ILMN_1728785, ILMN_1810962, ILMN_1670870, ILMN_1663037, ILMN_1796925, ILMN_1731215, ILMN_1698885, ILMN_1717599, ILMN_16…	778	470	19235	1.57811	0.999533	0.170618	20.883
INTERPRO	IPR003598:Immunoglobulin subtype 2	16	2.04082	0.0232039	ILMN_1753502, ILMN_1686623, ILMN_1728785, ILMN_1676709, ILMN_1707798, ILMN_1663037, ILMN_1756755, ILMN_1796925, ILMN_1752075, ILMN_1731215, ILMN_1717599, ILMN_1684447, ILMN_1802524, ILMN_1738639, ILMN_1749962, ILMN_1722809	689	205	16659	1.8871	1	0.463057	31.2597
INTERPRO	IPR003599:Immunoglobulin subtype	22	2.80612	0.0334634	ILMN_1765641, ILMN_1753502, ILMN_1715013, ILMN_1779875, ILMN_1765620, ILMN_1686623, ILMN_1700328, ILMN_1692739, ILMN_1728785, ILMN_1676709, ILMN_1810962, ILMN_1670870, ILMN_1796925, ILMN_1727633, ILMN_1752075, ILMN_1731215, ILMN_1717599, ILMN_1698885, ILMN_1684447, ILMN_1802524, ILMN_1715927, ILMN_1722809	689	330	16659	1.6119	1	0.576673	41.9238
SMART	SM00408:IGc2	16	2.04082	0.0436935	ILMN_1753502, ILMN_1686623, ILMN_1728785, ILMN_1676709, ILMN_1707798, ILMN_1663037, ILMN_1756755, ILMN_1796925, ILMN_1752075, ILMN_1731215, ILMN_1717599, ILMN_1684447, ILMN_1802524, ILMN_1738639, ILMN_1749962, ILMN_1722809	410	205	9079	1.7283	0.999933	0.413534	43.2551
INTERPRO	IPR007110:Immunoglobulin-like	29	3.69898	0.0664625	ILMN_1678812, ILMN_1765641, ILMN_1779875, ILMN_1765620, ILMN_1686623, ILMN_1700328, ILMN_1676709, ILMN_1707798, ILMN_1756755, ILMN_1727633, ILMN_1752075, ILMN_1807981, ILMN_1802524, ILMN_1715927, ILMN_1749962, ILMN_1722809, ILMN_1753502, ILMN_1715013, ILMN_1692739, ILMN_1728785, ILMN_1810962, ILMN_1670870, ILMN_1663037, ILMN_1796925, ILMN_1731215, ILMN_1698885, ILMN_1717599, ILMN_1684447, ILMN_17…	689	501	16659	1.39956	1	0.724106	66.6474
SMART	SM00409:IG	22	2.80612	0.0682129	ILMN_1765641, ILMN_1753502, ILMN_1715013, ILMN_1779875, ILMN_1765620, ILMN_1686623, ILMN_1700328, ILMN_1692739, ILMN_1728785, ILMN_1676709, ILMN_1810962, ILMN_1670870, ILMN_1796925, ILMN_1727633, ILMN_1752075, ILMN_1731215, ILMN_1717599, ILMN_1698885, ILMN_1684447, ILMN_1802524, ILMN_1715927, ILMN_1722809	410	330	9079	1.47626	1	0.498651	59.1807
UP_SEQ_FEATURE	domain:Ig-like C2-type 5	6	0.765306	0.0720582	ILMN_1717599, ILMN_1802524, ILMN_1686623, ILMN_1676709, ILMN_1749962, ILMN_1752075	778	55	19113	2.68002	1	0.894748	72.3926
UP_SEQ_FEATURE	domain:Ig-like C2-type 6	4	0.510204	0.189406	ILMN_1717599, ILMN_1802524, ILMN_1676709, ILMN_1752075	778	37	19113	2.65587	1	0.99096	97.3054
UP_SEQ_FEATURE	domain:Ig-like C2-type 4	6	0.765306	0.196359	ILMN_1717599, ILMN_1802524, ILMN_1686623, ILMN_1676709, ILMN_1749962, ILMN_1752075	778	76	19113	1.93949	1	0.991709	97.6767
INTERPRO	IPR013151:Immunoglobulin	12	1.53061	0.21457	ILMN_1765641, ILMN_1753502, ILMN_1717599, ILMN_1779875, ILMN_1684447, ILMN_1802524, ILMN_1686623, ILMN_1728785, ILMN_1676709, ILMN_1670870, ILMN_1749962, ILMN_1722809	689	202	16659	1.43635	1	0.940417	97.885
INTERPRO	IPR013783:Immunoglobulin-like fold	26	3.31633	0.355278	ILMN_1678812, ILMN_1765641, ILMN_1765620, ILMN_1686623, ILMN_1700328, ILMN_1676709, ILMN_1707798, ILMN_1756755, ILMN_1727633, ILMN_1752075, ILMN_1802524, ILMN_1715927, ILMN_1749962, ILMN_1722809, ILMN_1733259, ILMN_1753502, ILMN_1715013, ILMN_1692739, ILMN_1810962, ILMN_1663037, ILMN_1670870, ILMN_1796925, ILMN_1731215, ILMN_1717599, ILMN_1684447, ILMN_1738639	689	553	16659	1.13678	1	0.986878	99.9095
UP_SEQ_FEATURE	domain:Ig-like C2-type 1	10	1.27551	0.367947	ILMN_1731215, ILMN_1717599, ILMN_1802524, ILMN_1686623, ILMN_1676709, ILMN_1670870, ILMN_1749962, ILMN_1727633, ILMN_1796925, ILMN_1752075	778	190	19113	1.29299	1	0.999391	99.9628
UP_SEQ_FEATURE	domain:Ig-like C2-type 2	10	1.27551	0.373743	ILMN_1731215, ILMN_1717599, ILMN_1802524, ILMN_1686623, ILMN_1676709, ILMN_1670870, ILMN_1749962, ILMN_1727633, ILMN_1796925, ILMN_1752075	778	191	19113	1.28622	1	0.999408	99.9682
UP_SEQ_FEATURE	domain:Ig-like C2-type 3	7	0.892857	0.376741	ILMN_1717599, ILMN_1802524, ILMN_1686623, ILMN_1676709, ILMN_1670870, ILMN_1749962, ILMN_1752075	778	122	19113	1.40957	1	0.999384	99.9707
INTERPRO	IPR013106:Immunoglobulin V-set	10	1.27551	0.705113	ILMN_1678812, ILMN_1715013, ILMN_1753502, ILMN_1717599, ILMN_1765620, ILMN_1715927, ILMN_1686623, ILMN_1700328, ILMN_1727633, ILMN_1796925	689	249	16659	0.971025	1	0.999928	100
Annotation Cluster 75	Enrichment Score: 1.0215792466526963
Category	Term	Count	%	PValue	Genes	List Total	Pop Hits	Pop Total	Fold Enrichment	Bonferroni	Benjamini	FDR
GOTERM_BP_FAT	GO:0051017~actin filament bundle formation	4	0.510204	0.0555868	ILMN_1795937, ILMN_1798892, ILMN_1808707, ILMN_1671686	568	21	13528	4.53655	1	0.563214	63.6669
GOTERM_BP_FAT	GO:0007015~actin filament organization	7	0.892857	0.0808282	ILMN_1795937, ILMN_1651838, ILMN_1798892, ILMN_1808707, ILMN_1785265, ILMN_1671686, ILMN_1769926	568	72	13528	2.31553	1	0.649943	77.5082
GOTERM_MF_FAT	GO:0051015~actin filament binding	5	0.637755	0.191747	ILMN_1795937, ILMN_1798892, ILMN_1808707, ILMN_1681777, ILMN_1698307	558	53	12983	2.195	1	0.898505	96.2028
Annotation Cluster 76	Enrichment Score: 1.0036034593826362
Category	Term	Count	%	PValue	Genes	List Total	Pop Hits	Pop Total	Fold Enrichment	Bonferroni	Benjamini	FDR
GOTERM_BP_FAT	GO:0051270~regulation of cell motion	15	1.91327	0.0326203	ILMN_1765641, ILMN_1754375, ILMN_1779875, ILMN_1798892, ILMN_1792409, ILMN_1766925, ILMN_1810962, ILMN_1682738, ILMN_1673521, ILMN_1692664, ILMN_1689043, ILMN_1812824, ILMN_1699574, ILMN_1790270, ILMN_1669898	568	193	13528	1.85105	1	0.436623	44.406
GOTERM_BP_FAT	GO:0030334~regulation of cell migration	12	1.53061	0.0985895	ILMN_1754375, ILMN_1779875, ILMN_1792409, ILMN_1766925, ILMN_1812824, ILMN_1810962, ILMN_1790270, ILMN_1682738, ILMN_1692664, ILMN_1673521, ILMN_1669898, ILMN_1689043	568	169	13528	1.69114	1	0.71027	84.0776
GOTERM_BP_FAT	GO:0040013~negative regulation of locomotion	6	0.765306	0.111749	ILMN_1779875, ILMN_1810962, ILMN_1673521, ILMN_1767145, ILMN_1669898, ILMN_1689043	568	61	13528	2.34265	1	0.741212	87.7271
GOTERM_BP_FAT	GO:0051271~negative regulation of cell motion	6	0.765306	0.12364	ILMN_1779875, ILMN_1798892, ILMN_1810962, ILMN_1673521, ILMN_1669898, ILMN_1689043	568	63	13528	2.26828	1	0.76928	90.3322
GOTERM_BP_FAT	GO:0030336~negative regulation of cell migration	5	0.637755	0.215905	ILMN_1779875, ILMN_1810962, ILMN_1673521, ILMN_1669898, ILMN_1689043	568	57	13528	2.0892	1	0.893479	98.6509
Annotation Cluster 77	Enrichment Score: 1.0023040318300687
Category	Term	Count	%	PValue	Genes	List Total	Pop Hits	Pop Total	Fold Enrichment	Bonferroni	Benjamini	FDR
INTERPRO	IPR014768:GTPase-binding/formin homology 3	3	0.382653	0.0615134	ILMN_1744046, ILMN_1727248, ILMN_1761322	689	10	16659	7.25356	1	0.70168	63.7096
UP_SEQ_FEATURE	domain:GBD/FH3	3	0.382653	0.0711862	ILMN_1744046, ILMN_1727248, ILMN_1761322	778	11	19113	6.70005	1	0.895316	71.9427
INTERPRO	IPR003104:Actin-binding FH2 and DRF autoregulatory	3	0.382653	0.111711	ILMN_1744046, ILMN_1727248, ILMN_1761322	689	14	16659	5.18111	1	0.836659	84.9122
UP_SEQ_FEATURE	domain:FH2	3	0.382653	0.122292	ILMN_1744046, ILMN_1727248, ILMN_1761322	778	15	19113	4.91337	1	0.965716	89.4063
INTERPRO	IPR015425:Actin-binding FH2	3	0.382653	0.125511	ILMN_1744046, ILMN_1727248, ILMN_1761322	689	15	16659	4.8357	1	0.864014	88.2494
SMART	SM00498:FH2	3	0.382653	0.129013	ILMN_1744046, ILMN_1727248, ILMN_1761322	410	14	9079	4.74512	1	0.616335	82.6536
Annotation Cluster 78	Enrichment Score: 0.9855214951176687
Category	Term	Count	%	PValue	Genes	List Total	Pop Hits	Pop Total	Fold Enrichment	Bonferroni	Benjamini	FDR
GOTERM_BP_FAT	GO:0032103~positive regulation of response to external stimulus	9	1.14796	0.00507602	ILMN_1771800, ILMN_1718198, ILMN_1654072, ILMN_1766925, ILMN_1676449, ILMN_1703178, ILMN_1790270, ILMN_1682738, ILMN_1731062	568	64	13528	3.34925	0.999998	0.137058	8.61491
GOTERM_BP_FAT	GO:0048661~positive regulation of smooth muscle cell proliferation	3	0.382653	0.375288	ILMN_1771800, ILMN_1718198, ILMN_1766925	568	31	13528	2.30486	1	0.965899	99.9758
GOTERM_BP_FAT	GO:0048660~regulation of smooth muscle cell proliferation	3	0.382653	0.58016	ILMN_1771800, ILMN_1718198, ILMN_1766925	568	46	13528	1.55328	1	0.992361	100
Annotation Cluster 79	Enrichment Score: 0.9807455816096692
Category	Term	Count	%	PValue	Genes	List Total	Pop Hits	Pop Total	Fold Enrichment	Bonferroni	Benjamini	FDR
GOTERM_BP_FAT	GO:0050877~neurological system process	72	9.18367	0.00216313	ILMN_1720282, ILMN_1746027, ILMN_1715496, ILMN_1658835, ILMN_1725772, ILMN_1805098, ILMN_1772366, ILMN_1676609, ILMN_1740250, ILMN_1659086, ILMN_1690223, ILMN_1731062, ILMN_1770454, ILMN_1663640, ILMN_1793360, ILMN_1713139, ILMN_1652017, ILMN_1707571, ILMN_1812254, ILMN_1676449, ILMN_1807610, ILMN_1770905, ILMN_1693604, ILMN_1787552, ILMN_1749962, ILMN_1666904, ILMN_1747019, ILMN_1672660, ILMN_16…	568	1210	13528	1.4172	0.996237	0.0682267	3.76092
GOTERM_BP_FAT	GO:0050890~cognition	38	4.84694	0.599797	ILMN_1746027, ILMN_1715496, ILMN_1702787, ILMN_1668035, ILMN_1772366, ILMN_1805098, ILMN_1740250, ILMN_1726745, ILMN_1730845, ILMN_1814719, ILMN_1731062, ILMN_1804556, ILMN_1652017, ILMN_1672389, ILMN_1676449, ILMN_1707571, ILMN_1807610, ILMN_1789507, ILMN_1770905, ILMN_1767842, ILMN_1749962, ILMN_1729212, ILMN_1799878, ILMN_1723969, ILMN_1754375, ILMN_1744403, ILMN_1724066, ILMN_1652465, ILMN_16…	568	909	13528	0.995646	1	0.993346	100
GOTERM_BP_FAT	GO:0007600~sensory perception	29	3.69898	0.880392	ILMN_1715496, ILMN_1746027, ILMN_1702787, ILMN_1772366, ILMN_1726745, ILMN_1730845, ILMN_1740250, ILMN_1814719, ILMN_1731062, ILMN_1804556, ILMN_1652017, ILMN_1672389, ILMN_1807610, ILMN_1676449, ILMN_1789507, ILMN_1767842, ILMN_1749962, ILMN_1729212, ILMN_1799878, ILMN_1754375, ILMN_1744403, ILMN_1724066, ILMN_1652465, ILMN_1761280, ILMN_1749662, ILMN_1676003, ILMN_1790270, ILMN_1788291, ILMN_17…	568	810	13528	0.852704	1	0.999896	100
Annotation Cluster 80	Enrichment Score: 0.9632845243609588
Category	Term	Count	%	PValue	Genes	List Total	Pop Hits	Pop Total	Fold Enrichment	Bonferroni	Benjamini	FDR
PUBMED_ID	19198609	4	0.510204	0.00416261	ILMN_1736982, ILMN_1711208, ILMN_1707077, ILMN_1671843	783	12	27491	11.7033	1	0.791482	8.41706
PUBMED_ID	19299407	3	0.382653	0.0112338	ILMN_1711208, ILMN_1707077, ILMN_1671843	783	6	27491	17.5549	1	0.959488	21.1903
PUBMED_ID	19060910	3	0.382653	0.128558	ILMN_1711208, ILMN_1707077, ILMN_1671843	783	22	27491	4.7877	1	1	94.5007
PUBMED_ID	19060906	4	0.510204	0.135775	ILMN_1711208, ILMN_1764709, ILMN_1707077, ILMN_1671843	783	45	27491	3.12087	1	1	95.3849
PUBMED_ID	18193043	3	0.382653	0.199204	ILMN_1711208, ILMN_1707077, ILMN_1671843	783	29	27491	3.63205	1	1	99.0745
OMIM_DISEASE	Genome-wide association analysis of metabolic traits in a birth cohort from a founder population	3	0.382653	0.20387	ILMN_1711208, ILMN_1707077, ILMN_1671843	141	22	3671	3.55029	1	0.999541	94.6868
OMIM_DISEASE	Common variants at 30 loci contribute to polygenic dyslipidemia	4	0.510204	0.244994	ILMN_1711208, ILMN_1764709, ILMN_1707077, ILMN_1671843	141	45	3671	2.31426	1	0.999749	97.3156
PUBMED_ID	18193044	3	0.382653	0.251943	ILMN_1711208, ILMN_1707077, ILMN_1671843	783	34	27491	3.09793	1	1	99.7799
OMIM_DISEASE	Newly identified loci that influence lipid concentrations and risk of coronary artery disease	3	0.382653	0.303973	ILMN_1711208, ILMN_1707077, ILMN_1671843	141	29	3671	2.69332	1	0.999925	99.0579
OMIM_DISEASE	Six new loci associated with blood low-density lipoprotein cholesterol, high-density lipoprotein cholesterol or triglycerides in humans	3	0.382653	0.374452	ILMN_1711208, ILMN_1707077, ILMN_1671843	141	34	3671	2.29725	1	0.999984	99.7616
Annotation Cluster 81	Enrichment Score: 0.9583282818634001
Category	Term	Count	%	PValue	Genes	List Total	Pop Hits	Pop Total	Fold Enrichment	Bonferroni	Benjamini	FDR
INTERPRO	IPR000859:CUB	6	0.765306	0.0584675	ILMN_1658356, ILMN_1786966, ILMN_1730150, ILMN_1699574, ILMN_1659781, ILMN_1755158	689	51	16659	2.84453	1	0.702286	61.7827
SMART	SM00042:CUB	6	0.765306	0.0782858	ILMN_1658356, ILMN_1786966, ILMN_1730150, ILMN_1699574, ILMN_1659781, ILMN_1755158	410	51	9079	2.60516	1	0.518228	64.4369
UP_SEQ_FEATURE	domain:CUB 1	4	0.510204	0.179079	ILMN_1730150, ILMN_1699574, ILMN_1659781, ILMN_1755158	778	36	19113	2.72965	1	0.990226	96.6495
UP_SEQ_FEATURE	domain:CUB 2	4	0.510204	0.179079	ILMN_1730150, ILMN_1699574, ILMN_1659781, ILMN_1755158	778	36	19113	2.72965	1	0.990226	96.6495
Annotation Cluster 82	Enrichment Score: 0.9503206459060055
Category	Term	Count	%	PValue	Genes	List Total	Pop Hits	Pop Total	Fold Enrichment	Bonferroni	Benjamini	FDR
INTERPRO	IPR018979:FERM, N-terminal	5	0.637755	0.0337048	ILMN_1678353, ILMN_1805448, ILMN_1795937, ILMN_1700042, ILMN_1658081	689	30	16659	4.02975	1	0.570974	42.1549
INTERPRO	IPR018980:FERM, C-terminal PH-like domain	4	0.510204	0.082286	ILMN_1678353, ILMN_1805448, ILMN_1795937, ILMN_1658081	689	25	16659	3.86856	1	0.777783	74.6141
INTERPRO	IPR019750:Band 4.1 subgroup	4	0.510204	0.082286	ILMN_1678353, ILMN_1805448, ILMN_1795937, ILMN_1658081	689	25	16659	3.86856	1	0.777783	74.6141
INTERPRO	IPR014352:FERM/acyl-CoA-binding protein, 3-helical bundle	5	0.637755	0.100469	ILMN_1678353, ILMN_1805448, ILMN_1795937, ILMN_1700042, ILMN_1658081	689	43	16659	2.81146	1	0.811091	81.5571
INTERPRO	IPR019748:FERM central domain	5	0.637755	0.128156	ILMN_1678353, ILMN_1805448, ILMN_1795937, ILMN_1700042, ILMN_1658081	689	47	16659	2.57218	1	0.866372	88.8042
INTERPRO	IPR000299:FERM domain	5	0.637755	0.128156	ILMN_1678353, ILMN_1805448, ILMN_1795937, ILMN_1700042, ILMN_1658081	689	47	16659	2.57218	1	0.866372	88.8042
UP_SEQ_FEATURE	domain:FERM	5	0.637755	0.130072	ILMN_1678353, ILMN_1805448, ILMN_1795937, ILMN_1700042, ILMN_1658081	778	48	19113	2.55905	1	0.971496	90.9115
INTERPRO	IPR019749:Band 4.1 domain	5	0.637755	0.150771	ILMN_1678353, ILMN_1805448, ILMN_1795937, ILMN_1700042, ILMN_1658081	689	50	16659	2.41785	1	0.894241	92.6409
INTERPRO	IPR019747:FERM conserved site	5	0.637755	0.150771	ILMN_1678353, ILMN_1805448, ILMN_1795937, ILMN_1700042, ILMN_1658081	689	50	16659	2.41785	1	0.894241	92.6409
INTERPRO	IPR000798:Ezrin/radixin/moesin ERM	3	0.382653	0.168954	ILMN_1678353, ILMN_1805448, ILMN_1795937	689	18	16659	4.02975	1	0.908617	94.7911
SMART	SM00295:B41	5	0.637755	0.187082	ILMN_1678353, ILMN_1805448, ILMN_1795937, ILMN_1700042, ILMN_1658081	410	50	9079	2.21439	1	0.740617	92.7692
Annotation Cluster 83	Enrichment Score: 0.9389234873544728
Category	Term	Count	%	PValue	Genes	List Total	Pop Hits	Pop Total	Fold Enrichment	Bonferroni	Benjamini	FDR
GOTERM_BP_FAT	GO:0007169~transmembrane receptor protein tyrosine kinase signaling pathway	19	2.42347	0.00631753	ILMN_1763344, ILMN_1754375, ILMN_1686623, ILMN_1730845, ILMN_1753135, ILMN_1656300, ILMN_1728572, ILMN_1770454, ILMN_1707077, ILMN_1718663, ILMN_1810559, ILMN_1698885, ILMN_1699574, ILMN_1721626, ILMN_1695606, ILMN_1802646, ILMN_1770905, ILMN_1663263, ILMN_1668022	568	224	13528	2.02018	1	0.161114	10.6127
GOTERM_MF_FAT	GO:0005003~ephrin receptor activity	4	0.510204	0.0341021	ILMN_1695606, ILMN_1802646, ILMN_1663263, ILMN_1668022	558	17	12983	5.47459	1	0.520948	41.3232
GOTERM_MF_FAT	GO:0004714~transmembrane receptor protein tyrosine kinase activity	7	0.892857	0.0669805	ILMN_1686623, ILMN_1699574, ILMN_1695606, ILMN_1802646, ILMN_1753135, ILMN_1663263, ILMN_1668022	558	67	12983	2.43088	1	0.687813	65.5358
PUBMED_ID	10207129	3	0.382653	0.109665	ILMN_1695606, ILMN_1802646, ILMN_1668022	783	20	27491	5.26648	1	1	91.3571
PUBMED_ID	11256076	3	0.382653	0.109665	ILMN_1695606, ILMN_1802646, ILMN_1668022	783	20	27491	5.26648	1	1	91.3571
PUBMED_ID	9267020	3	0.382653	0.109665	ILMN_1695606, ILMN_1802646, ILMN_1668022	783	20	27491	5.26648	1	1	91.3571
PUBMED_ID	9530499	3	0.382653	0.109665	ILMN_1695606, ILMN_1802646, ILMN_1668022	783	20	27491	5.26648	1	1	91.3571
PUBMED_ID	9576626	3	0.382653	0.109665	ILMN_1695606, ILMN_1802646, ILMN_1668022	783	20	27491	5.26648	1	1	91.3571
PUBMED_ID	11128993	3	0.382653	0.119017	ILMN_1695606, ILMN_1802646, ILMN_1668022	783	21	27491	5.01569	1	1	93.0818
PUBMED_ID	10730216	3	0.382653	0.119017	ILMN_1695606, ILMN_1802646, ILMN_1668022	783	21	27491	5.01569	1	1	93.0818
INTERPRO	IPR001245:Tyrosine protein kinase	6	0.765306	0.540856	ILMN_1686623, ILMN_1776708, ILMN_1802646, ILMN_1753135, ILMN_1663263, ILMN_1668022	689	118	16659	1.22942	1	0.998714	99.9996
GOTERM_MF_FAT	GO:0004713~protein tyrosine kinase activity	8	1.02041	0.572919	ILMN_1658835, ILMN_1686623, ILMN_1699574, ILMN_1695606, ILMN_1802646, ILMN_1753135, ILMN_1663263, ILMN_1668022	558	166	12983	1.1213	1	0.994235	99.9998
SMART	SM00219:TyrKc	6	0.765306	0.619425	ILMN_1686623, ILMN_1776708, ILMN_1802646, ILMN_1753135, ILMN_1663263, ILMN_1668022	410	118	9079	1.12596	1	0.973851	99.9995
Annotation Cluster 84	Enrichment Score: 0.9218122577970698
Category	Term	Count	%	PValue	Genes	List Total	Pop Hits	Pop Total	Fold Enrichment	Bonferroni	Benjamini	FDR
GOTERM_BP_FAT	GO:0050806~positive regulation of synaptic transmission	5	0.637755	0.0524325	ILMN_1651817, ILMN_1666924, ILMN_1740250, ILMN_1790270, ILMN_1673521	568	34	13528	3.50249	1	0.545649	61.4577
GOTERM_BP_FAT	GO:0051971~positive regulation of transmission of nerve impulse	5	0.637755	0.0677898	ILMN_1651817, ILMN_1666924, ILMN_1740250, ILMN_1790270, ILMN_1673521	568	37	13528	3.2185	1	0.608456	71.1389
GOTERM_BP_FAT	GO:0031646~positive regulation of neurological system process	5	0.637755	0.0791785	ILMN_1651817, ILMN_1666924, ILMN_1740250, ILMN_1790270, ILMN_1673521	568	39	13528	3.05345	1	0.645608	76.7828
GOTERM_BP_FAT	GO:0010647~positive regulation of cell communication	13	1.65816	0.730093	ILMN_1658835, ILMN_1651817, ILMN_1666924, ILMN_1766925, ILMN_1740250, ILMN_1673521, ILMN_1671809, ILMN_1660549, ILMN_1724863, ILMN_1758939, ILMN_1749662, ILMN_1671260, ILMN_1790270, ILMN_1723978	568	329	13528	0.941093	1	0.998289	100
Annotation Cluster 85	Enrichment Score: 0.9015861584089974
Category	Term	Count	%	PValue	Genes	List Total	Pop Hits	Pop Total	Fold Enrichment	Bonferroni	Benjamini	FDR
GOTERM_CC_FAT	GO:0030016~myofibril	11	1.40306	0.0292037	ILMN_1758825, ILMN_1654422, ILMN_1664071, ILMN_1716407, ILMN_1798892, ILMN_1660775, ILMN_1668411, ILMN_1703558, ILMN_1712075, ILMN_1752075, ILMN_1669714	581	111	12782	2.18018	0.999977	0.234134	33.4395
GOTERM_CC_FAT	GO:0043292~contractile fiber	11	1.40306	0.0482938	ILMN_1758825, ILMN_1654422, ILMN_1664071, ILMN_1716407, ILMN_1798892, ILMN_1660775, ILMN_1668411, ILMN_1703558, ILMN_1712075, ILMN_1752075, ILMN_1669714	581	121	12782	2	1	0.326988	49.3292
GOTERM_MF_FAT	GO:0008307~structural constituent of muscle	5	0.637755	0.104405	ILMN_1654422, ILMN_1716407, ILMN_1712075, ILMN_1752075, ILMN_1669714	558	42	12983	2.76988	1	0.778284	81.6265
GOTERM_CC_FAT	GO:0044449~contractile fiber part	9	1.14796	0.141274	ILMN_1654422, ILMN_1664071, ILMN_1716407, ILMN_1798892, ILMN_1660775, ILMN_1668411, ILMN_1703558, ILMN_1712075, ILMN_1669714	581	113	12782	1.75221	1	0.581181	87.6532
GOTERM_CC_FAT	GO:0030018~Z disc	5	0.637755	0.154572	ILMN_1654422, ILMN_1716407, ILMN_1798892, ILMN_1668411, ILMN_1703558	581	46	12782	2.3913	1	0.594331	90.0353
GOTERM_CC_FAT	GO:0030017~sarcomere	8	1.02041	0.15683	ILMN_1654422, ILMN_1664071, ILMN_1716407, ILMN_1798892, ILMN_1660775, ILMN_1668411, ILMN_1703558, ILMN_1669714	581	98	12782	1.79592	1	0.594691	90.3946
GOTERM_CC_FAT	GO:0031674~I band	5	0.637755	0.238671	ILMN_1654422, ILMN_1716407, ILMN_1798892, ILMN_1668411, ILMN_1703558	581	55	12782	2	1	0.720545	97.6368
SP_PIR_KEYWORDS	cardiac muscle	3	0.382653	0.252712	ILMN_1654422, ILMN_1664071, ILMN_1668411	778	24	19235	3.09046	1	0.802005	98.4308
SP_PIR_KEYWORDS	heart	3	0.382653	0.252712	ILMN_1654422, ILMN_1664071, ILMN_1668411	778	24	19235	3.09046	1	0.802005	98.4308
Annotation Cluster 86	Enrichment Score: 0.8470302816104731
Category	Term	Count	%	PValue	Genes	List Total	Pop Hits	Pop Total	Fold Enrichment	Bonferroni	Benjamini	FDR
GOTERM_BP_FAT	GO:0032103~positive regulation of response to external stimulus	9	1.14796	0.00507602	ILMN_1771800, ILMN_1718198, ILMN_1654072, ILMN_1766925, ILMN_1676449, ILMN_1703178, ILMN_1790270, ILMN_1682738, ILMN_1731062	568	64	13528	3.34925	0.999998	0.137058	8.61491
GOTERM_BP_FAT	GO:0007626~locomotory behavior	21	2.67857	0.0115398	ILMN_1765641, ILMN_1750373, ILMN_1792409, ILMN_1654072, ILMN_1805098, ILMN_1653464, ILMN_1800889, ILMN_1748323, ILMN_1750706, ILMN_1653161, ILMN_1815319, ILMN_1771800, ILMN_1740508, ILMN_1676449, ILMN_1703178, ILMN_1695606, ILMN_1765558, ILMN_1679754, ILMN_1757387, ILMN_1693604, ILMN_1799878	568	274	13528	1.82538	1	0.225664	18.5739
GOTERM_BP_FAT	GO:0006935~chemotaxis	9	1.14796	0.356315	ILMN_1765641, ILMN_1815319, ILMN_1750373, ILMN_1771800, ILMN_1792409, ILMN_1654072, ILMN_1676449, ILMN_1703178, ILMN_1748323	568	160	13528	1.3397	1	0.962107	99.959
GOTERM_BP_FAT	GO:0042330~taxis	9	1.14796	0.356315	ILMN_1765641, ILMN_1815319, ILMN_1750373, ILMN_1771800, ILMN_1792409, ILMN_1654072, ILMN_1676449, ILMN_1703178, ILMN_1748323	568	160	13528	1.3397	1	0.962107	99.959
GOTERM_BP_FAT	GO:0030595~leukocyte chemotaxis	3	0.382653	0.463135	ILMN_1771800, ILMN_1654072, ILMN_1703178	568	37	13528	1.9311	1	0.981663	99.9983
GOTERM_BP_FAT	GO:0060326~cell chemotaxis	3	0.382653	0.490786	ILMN_1771800, ILMN_1654072, ILMN_1703178	568	39	13528	1.83207	1	0.984891	99.9994
GOTERM_BP_FAT	GO:0050900~leukocyte migration	3	0.382653	0.696301	ILMN_1771800, ILMN_1654072, ILMN_1703178	568	57	13528	1.25352	1	0.997404	100
Annotation Cluster 87	Enrichment Score: 0.8413391159287966
Category	Term	Count	%	PValue	Genes	List Total	Pop Hits	Pop Total	Fold Enrichment	Bonferroni	Benjamini	FDR
PUBMED_ID	12853948	25	3.18878	0.0195507	ILMN_1765641, ILMN_1657129, ILMN_1768486, ILMN_1765620, ILMN_1732636, ILMN_1757497, ILMN_1808707, ILMN_1690223, ILMN_1731062, ILMN_1712806, ILMN_1735798, ILMN_1662927, ILMN_1759598, ILMN_1738212, ILMN_1685608, ILMN_1801205, ILMN_1811849, ILMN_1802646, ILMN_1729212, ILMN_1722809, ILMN_1809437, ILMN_1776708, ILMN_1652465, ILMN_1663575, ILMN_1786257	783	534	27491	1.64372	1	0.991908	34.0442
PUBMED_ID	12690205	22	2.80612	0.158364	ILMN_1765641, ILMN_1754375, ILMN_1657129, ILMN_1658835, ILMN_1765620, ILMN_1732636, ILMN_1690223, ILMN_1731062, ILMN_1698307, ILMN_1735798, ILMN_1663575, ILMN_1759598, ILMN_1786257, ILMN_1738212, ILMN_1725241, ILMN_1748812, ILMN_1801205, ILMN_1685608, ILMN_1802646, ILMN_1790270, ILMN_1722809	783	582	27491	1.32718	1	1	97.3593
CHROMOSOME	7	33	4.20918	0.966416	ILMN_1765641, ILMN_1657129, ILMN_1768486, ILMN_1658835, ILMN_1765620, ILMN_1732636, ILMN_1757497, ILMN_1808707, ILMN_1690223, ILMN_1731062, ILMN_1698307, ILMN_1712806, ILMN_1662927, ILMN_1735798, ILMN_1759598, ILMN_1725241, ILMN_1738212, ILMN_1685608, ILMN_1801205, ILMN_1811849, ILMN_1802646, ILMN_1809437, ILMN_1722809, ILMN_1729212, ILMN_1754375, ILMN_1698038, ILMN_1776708, ILMN_1652465, ILMN_17…	784	2354	43203	0.772512	1	0.979814	100
Annotation Cluster 88	Enrichment Score: 0.8307743178508815
Category	Term	Count	%	PValue	Genes	List Total	Pop Hits	Pop Total	Fold Enrichment	Bonferroni	Benjamini	FDR
SP_PIR_KEYWORDS	actin binding	6	0.765306	0.0216993	ILMN_1654422, ILMN_1664071, ILMN_1795937, ILMN_1798892, ILMN_1660775, ILMN_1785265	778	40	19235	3.70855	0.999964	0.212001	26.8666
SP_PIR_KEYWORDS	EF hand	6	0.765306	0.0943711	ILMN_1654422, ILMN_1795251, ILMN_1798892, ILMN_1815033, ILMN_1785265, ILMN_1695645	778	60	19235	2.47237	1	0.53181	75.6769
INTERPRO	IPR001715:Calponin-like actin-binding	6	0.765306	0.162521	ILMN_1654422, ILMN_1728650, ILMN_1798892, ILMN_1785265, ILMN_1803423, ILMN_1738418	689	70	16659	2.07244	1	0.901788	94.1086
SMART	SM00033:CH	6	0.765306	0.20702	ILMN_1654422, ILMN_1728650, ILMN_1798892, ILMN_1785265, ILMN_1803423, ILMN_1738418	410	70	9079	1.89805	1	0.759463	94.7227
INTERPRO	IPR001589:Actinin-type, actin-binding, conserved site	3	0.382653	0.245336	ILMN_1654422, ILMN_1798892, ILMN_1785265	689	23	16659	3.15372	1	0.954397	98.8825
UP_SEQ_FEATURE	domain:CH 1	3	0.382653	0.300819	ILMN_1654422, ILMN_1798892, ILMN_1785265	778	27	19113	2.72965	1	0.99822	99.7885
UP_SEQ_FEATURE	domain:CH 2	3	0.382653	0.300819	ILMN_1654422, ILMN_1798892, ILMN_1785265	778	27	19113	2.72965	1	0.99822	99.7885
Annotation Cluster 89	Enrichment Score: 0.8224426380363491
Category	Term	Count	%	PValue	Genes	List Total	Pop Hits	Pop Total	Fold Enrichment	Bonferroni	Benjamini	FDR
GOTERM_BP_FAT	GO:0048738~cardiac muscle tissue development	7	0.892857	0.0314169	ILMN_1664071, ILMN_1671151, ILMN_1789507, ILMN_1690807, ILMN_1814719, ILMN_1796925, ILMN_1669714	568	57	13528	2.92488	1	0.435308	43.1689
GOTERM_BP_FAT	GO:0007517~muscle organ development	16	2.04082	0.0322732	ILMN_1754375, ILMN_1658835, ILMN_1742544, ILMN_1703558, ILMN_1814719, ILMN_1770454, ILMN_1796925, ILMN_1664071, ILMN_1726597, ILMN_1671151, ILMN_1721626, ILMN_1690807, ILMN_1789507, ILMN_1779823, ILMN_1681780, ILMN_1669714	568	211	13528	1.80602	1	0.435286	44.0518
GOTERM_BP_FAT	GO:0016202~regulation of striated muscle tissue development	6	0.765306	0.0573141	ILMN_1808587, ILMN_1690807, ILMN_1814719, ILMN_1682738, ILMN_1770454, ILMN_1796925	568	50	13528	2.85803	1	0.572607	64.8256
GOTERM_BP_FAT	GO:0048634~regulation of muscle development	6	0.765306	0.0614565	ILMN_1808587, ILMN_1690807, ILMN_1814719, ILMN_1682738, ILMN_1770454, ILMN_1796925	568	51	13528	2.80199	1	0.586811	67.4636
GOTERM_BP_FAT	GO:0014706~striated muscle tissue development	10	1.27551	0.0622798	ILMN_1754375, ILMN_1664071, ILMN_1658835, ILMN_1671151, ILMN_1789507, ILMN_1690807, ILMN_1814719, ILMN_1770454, ILMN_1796925, ILMN_1669714	568	119	13528	2.00142	1	0.589863	67.9652
GOTERM_BP_FAT	GO:0042692~muscle cell differentiation	10	1.27551	0.0677173	ILMN_1664071, ILMN_1658835, ILMN_1749662, ILMN_1671151, ILMN_1690807, ILMN_1779823, ILMN_1723978, ILMN_1770454, ILMN_1796925, ILMN_1707077	568	121	13528	1.96834	1	0.609956	71.0991
GOTERM_BP_FAT	GO:0051146~striated muscle cell differentiation	8	1.02041	0.0757933	ILMN_1664071, ILMN_1658835, ILMN_1749662, ILMN_1671151, ILMN_1779823, ILMN_1770454, ILMN_1796925, ILMN_1707077	568	88	13528	2.16517	1	0.634294	75.2245
GOTERM_BP_FAT	GO:0060537~muscle tissue development	10	1.27551	0.0794605	ILMN_1754375, ILMN_1664071, ILMN_1658835, ILMN_1671151, ILMN_1789507, ILMN_1690807, ILMN_1814719, ILMN_1770454, ILMN_1796925, ILMN_1669714	568	125	13528	1.90535	1	0.645181	76.9084
GOTERM_BP_FAT	GO:0055010~ventricular cardiac muscle morphogenesis	3	0.382653	0.234893	ILMN_1664071, ILMN_1789507, ILMN_1669714	568	22	13528	3.24776	1	0.90746	99.1259
GOTERM_BP_FAT	GO:0055008~cardiac muscle tissue morphogenesis	3	0.382653	0.313566	ILMN_1664071, ILMN_1789507, ILMN_1669714	568	27	13528	2.64632	1	0.948035	99.872
GOTERM_BP_FAT	GO:0060415~muscle tissue morphogenesis	3	0.382653	0.313566	ILMN_1664071, ILMN_1789507, ILMN_1669714	568	27	13528	2.64632	1	0.948035	99.872
GOTERM_BP_FAT	GO:0003007~heart morphogenesis	5	0.637755	0.366396	ILMN_1664071, ILMN_1789507, ILMN_1690807, ILMN_1814719, ILMN_1669714	568	73	13528	1.63129	1	0.964973	99.969
GOTERM_BP_FAT	GO:0055002~striated muscle cell development	4	0.510204	0.372857	ILMN_1664071, ILMN_1658835, ILMN_1770454, ILMN_1796925	568	52	13528	1.83207	1	0.965911	99.9741
GOTERM_BP_FAT	GO:0007507~heart development	11	1.40306	0.414058	ILMN_1664071, ILMN_1699574, ILMN_1671151, ILMN_1789507, ILMN_1690807, ILMN_1679754, ILMN_1814719, ILMN_1724832, ILMN_1653751, ILMN_1796925, ILMN_1669714	568	215	13528	1.21854	1	0.974395	99.9922
GOTERM_BP_FAT	GO:0055001~muscle cell development	4	0.510204	0.418533	ILMN_1664071, ILMN_1658835, ILMN_1770454, ILMN_1796925	568	56	13528	1.70121	1	0.974492	99.9932
GOTERM_BP_FAT	GO:0048747~muscle fiber development	3	0.382653	0.43462	ILMN_1658835, ILMN_1770454, ILMN_1796925	568	35	13528	2.04145	1	0.976938	99.9959
GOTERM_BP_FAT	GO:0048729~tissue morphogenesis	9	1.14796	0.484049	ILMN_1664071, ILMN_1676449, ILMN_1806667, ILMN_1789507, ILMN_1682738, ILMN_1724832, ILMN_1740623, ILMN_1671318, ILMN_1703487, ILMN_1669714	568	180	13528	1.19085	1	0.984248	99.9992
Annotation Cluster 90	Enrichment Score: 0.8075786387641324
Category	Term	Count	%	PValue	Genes	List Total	Pop Hits	Pop Total	Fold Enrichment	Bonferroni	Benjamini	FDR
INTERPRO	IPR013767:PAS fold	5	0.637755	0.01828	ILMN_1704063, ILMN_1659197, ILMN_1765558, ILMN_1718046, ILMN_1747067	689	25	16659	4.8357	1	0.418129	25.5137
INTERPRO	IPR000014:PAS	5	0.637755	0.0457164	ILMN_1704063, ILMN_1659197, ILMN_1765558, ILMN_1718046, ILMN_1747067	689	33	16659	3.66341	1	0.645525	52.6267
SMART	SM00091:PAS	5	0.637755	0.0592843	ILMN_1704063, ILMN_1659197, ILMN_1765558, ILMN_1718046, ILMN_1747067	410	33	9079	3.35514	0.999998	0.499204	53.9328
UP_SEQ_FEATURE	domain:PAC	4	0.510204	0.0870775	ILMN_1704063, ILMN_1765558, ILMN_1718046, ILMN_1747067	778	26	19113	3.77951	1	0.922089	79.1522
INTERPRO	IPR001610:PAC motif	4	0.510204	0.0902908	ILMN_1704063, ILMN_1765558, ILMN_1718046, ILMN_1747067	689	26	16659	3.71977	1	0.799263	77.9278
SMART	SM00086:PAC	4	0.510204	0.109923	ILMN_1704063, ILMN_1765558, ILMN_1718046, ILMN_1747067	410	26	9079	3.40675	1	0.591046	77.1638
INTERPRO	IPR013655:PAS fold-3	3	0.382653	0.168954	ILMN_1765558, ILMN_1718046, ILMN_1747067	689	18	16659	4.02975	1	0.908617	94.7911
UP_SEQ_FEATURE	domain:PAS 2	3	0.382653	0.179507	ILMN_1765558, ILMN_1718046, ILMN_1747067	778	19	19113	3.87897	1	0.989816	96.6794
UP_SEQ_FEATURE	domain:PAS 1	3	0.382653	0.179507	ILMN_1765558, ILMN_1718046, ILMN_1747067	778	19	19113	3.87897	1	0.989816	96.6794
UP_SEQ_FEATURE	DNA-binding region:Basic motif	10	1.27551	0.209375	ILMN_1656383, ILMN_1763207, ILMN_1768534, ILMN_1739450, ILMN_1765558, ILMN_1653466, ILMN_1764709, ILMN_1693014, ILMN_1718046, ILMN_1747067	778	161	19113	1.52589	1	0.99318	98.2459
UP_SEQ_FEATURE	domain:Helix-loop-helix motif	6	0.765306	0.496005	ILMN_1656383, ILMN_1768534, ILMN_1765558, ILMN_1653466, ILMN_1718046, ILMN_1747067	778	114	19113	1.29299	1	0.999932	99.9992
INTERPRO	IPR001092:Basic helix-loop-helix dimerisation region bHLH	6	0.765306	0.510077	ILMN_1656383, ILMN_1768534, ILMN_1765558, ILMN_1653466, ILMN_1718046, ILMN_1747067	689	114	16659	1.27255	1	0.997968	99.9989
SMART	SM00353:HLH	6	0.765306	0.588644	ILMN_1656383, ILMN_1768534, ILMN_1765558, ILMN_1653466, ILMN_1718046, ILMN_1747067	410	114	9079	1.16547	1	0.966973	99.9987
INTERPRO	IPR011598:Helix-loop-helix DNA-binding	4	0.510204	0.679895	ILMN_1768534, ILMN_1765558, ILMN_1653466, ILMN_1718046	689	84	16659	1.15136	1	0.999888	100
Annotation Cluster 91	Enrichment Score: 0.8023879815614775
Category	Term	Count	%	PValue	Genes	List Total	Pop Hits	Pop Total	Fold Enrichment	Bonferroni	Benjamini	FDR
GOTERM_BP_FAT	GO:0016192~vesicle-mediated transport	32	4.08163	0.0903714	ILMN_1812403, ILMN_1731206, ILMN_1674580, ILMN_1779401, ILMN_1768486, ILMN_1658835, ILMN_1682929, ILMN_1707798, ILMN_1698307, ILMN_1712806, ILMN_1662927, ILMN_1705655, ILMN_1666625, ILMN_1810782, ILMN_1669355, ILMN_1802524, ILMN_1703142, ILMN_1763834, ILMN_1754375, ILMN_1722037, ILMN_1808501, ILMN_1797604, ILMN_1763387, ILMN_1658643, ILMN_1707077, ILMN_1766654, ILMN_1802690, ILMN_1771622, ILMN_17…	568	576	13528	1.32316	1	0.682224	81.3024
GOTERM_BP_FAT	GO:0016044~membrane organization	22	2.80612	0.122256	ILMN_1754375, ILMN_1658835, ILMN_1703006, ILMN_1808501, ILMN_1797604, ILMN_1763387, ILMN_1698307, ILMN_1770454, ILMN_1712806, ILMN_1707077, ILMN_1662927, ILMN_1790978, ILMN_1802690, ILMN_1771622, ILMN_1733746, ILMN_1810782, ILMN_1690125, ILMN_1683146, ILMN_1802524, ILMN_1703142, ILMN_1804419, ILMN_1657760, ILMN_1722809, ILMN_1763834	568	381	13528	1.37525	1	0.766667	90.0583
SP_PIR_KEYWORDS	Endocytosis	7	0.892857	0.192096	ILMN_1662927, ILMN_1771622, ILMN_1810782, ILMN_1808501, ILMN_1703142, ILMN_1698307, ILMN_1763834, ILMN_1707077, ILMN_1712806	778	96	19235	1.80277	1	0.735052	95.2274
GOTERM_BP_FAT	GO:0006897~endocytosis	13	1.65816	0.214102	ILMN_1754375, ILMN_1808501, ILMN_1797604, ILMN_1763387, ILMN_1698307, ILMN_1707077, ILMN_1712806, ILMN_1662927, ILMN_1802690, ILMN_1771622, ILMN_1810782, ILMN_1690125, ILMN_1802524, ILMN_1703142, ILMN_1763834	568	220	13528	1.40736	1	0.892063	98.5949
GOTERM_BP_FAT	GO:0010324~membrane invagination	13	1.65816	0.214102	ILMN_1754375, ILMN_1808501, ILMN_1797604, ILMN_1763387, ILMN_1698307, ILMN_1707077, ILMN_1712806, ILMN_1662927, ILMN_1802690, ILMN_1771622, ILMN_1810782, ILMN_1690125, ILMN_1802524, ILMN_1703142, ILMN_1763834	568	220	13528	1.40736	1	0.892063	98.5949
Annotation Cluster 92	Enrichment Score: 0.7826498396142896
Category	Term	Count	%	PValue	Genes	List Total	Pop Hits	Pop Total	Fold Enrichment	Bonferroni	Benjamini	FDR
GOTERM_BP_FAT	GO:0015674~di-, tri-valent inorganic cation transport	14	1.78571	0.0340449	ILMN_1675391, ILMN_1712023, ILMN_1806908, ILMN_1659733, ILMN_1768758, ILMN_1763604, ILMN_1731062, ILMN_1754076, ILMN_1663575, ILMN_1758400, ILMN_1666445, ILMN_1804556, ILMN_1683146, ILMN_1779823, ILMN_1716563, ILMN_1809695	568	176	13528	1.89453	1	0.442135	45.8376
GOTERM_BP_FAT	GO:0006816~calcium ion transport	12	1.53061	0.0364254	ILMN_1675391, ILMN_1712023, ILMN_1659733, ILMN_1806908, ILMN_1768758, ILMN_1763604, ILMN_1731062, ILMN_1754076, ILMN_1758400, ILMN_1666445, ILMN_1804556, ILMN_1779823, ILMN_1716563, ILMN_1809695	568	142	13528	2.0127	1	0.45838	48.1525
KEGG_PATHWAY	hsa05414:Dilated cardiomyopathy	8	1.02041	0.0966358	ILMN_1664071, ILMN_1660775, ILMN_1659733, ILMN_1708588, ILMN_1810691, ILMN_1763604, ILMN_1768758, ILMN_1754076, ILMN_1669714	218	92	5085	2.02832	1	0.655999	70.1618
GOTERM_MF_FAT	GO:0005245~voltage-gated calcium channel activity	4	0.510204	0.116703	ILMN_1659733, ILMN_1779823, ILMN_1763604, ILMN_1768758, ILMN_1754076	558	28	12983	3.32386	1	0.805955	85.1432
SP_PIR_KEYWORDS	calcium transport	7	0.892857	0.12909	ILMN_1675391, ILMN_1712023, ILMN_1804556, ILMN_1659733, ILMN_1779823, ILMN_1763604, ILMN_1768758, ILMN_1754076	778	85	19235	2.03607	1	0.629549	86.0719
KEGG_PATHWAY	hsa05412:Arrhythmogenic right ventricular cardiomyopathy (ARVC)	6	0.765306	0.222995	ILMN_1654422, ILMN_1798892, ILMN_1659733, ILMN_1796901, ILMN_1763604, ILMN_1768758, ILMN_1754076	218	76	5085	1.8415	1	0.843464	95.0335
SP_PIR_KEYWORDS	calcium channel	5	0.637755	0.232177	ILMN_1804556, ILMN_1659733, ILMN_1779823, ILMN_1763604, ILMN_1768758, ILMN_1754076	778	61	19235	2.02653	1	0.7861	97.6902
KEGG_PATHWAY	hsa04260:Cardiac muscle contraction	6	0.765306	0.23886	ILMN_1664071, ILMN_1660775, ILMN_1659733, ILMN_1763604, ILMN_1768758, ILMN_1754076, ILMN_1669714	218	78	5085	1.79428	1	0.825255	96.1146
GOTERM_MF_FAT	GO:0005262~calcium channel activity	6	0.765306	0.250906	ILMN_1758400, ILMN_1804556, ILMN_1659733, ILMN_1779823, ILMN_1763604, ILMN_1768758, ILMN_1754076	558	79	12983	1.76712	1	0.931189	98.819
GOTERM_CC_FAT	GO:0005891~voltage-gated calcium channel complex	3	0.382653	0.263511	ILMN_1659733, ILMN_1779823, ILMN_1763604, ILMN_1768758	581	22	12782	3	1	0.743181	98.5015
KEGG_PATHWAY	hsa05410:Hypertrophic cardiomyopathy (HCM)	6	0.765306	0.296496	ILMN_1664071, ILMN_1660775, ILMN_1659733, ILMN_1763604, ILMN_1768758, ILMN_1754076, ILMN_1669714	218	85	5085	1.64652	1	0.863079	98.4777
GOTERM_CC_FAT	GO:0034704~calcium channel complex	3	0.382653	0.348365	ILMN_1659733, ILMN_1779823, ILMN_1763604, ILMN_1768758	581	27	12782	2.44444	1	0.819691	99.7211
SP_PIR_KEYWORDS	muscle protein	4	0.510204	0.438895	ILMN_1664071, ILMN_1660775, ILMN_1752075, ILMN_1669714	778	60	19235	1.64824	1	0.915899	99.9736
Annotation Cluster 93	Enrichment Score: 0.7721924599344522
Category	Term	Count	%	PValue	Genes	List Total	Pop Hits	Pop Total	Fold Enrichment	Bonferroni	Benjamini	FDR
INTERPRO	IPR001879:GPCR, family 2, extracellular region	4	0.510204	0.0986055	ILMN_1729075, ILMN_1697548, ILMN_1711208, ILMN_1773109	689	27	16659	3.582	1	0.80947	80.9375
SMART	SM00008:HormR	4	0.510204	0.119747	ILMN_1729075, ILMN_1697548, ILMN_1711208, ILMN_1773109	410	27	9079	3.28058	1	0.611552	80.162
INTERPRO	IPR000832:GPCR, family 2, secretin-like	5	0.637755	0.120957	ILMN_1729075, ILMN_1697548, ILMN_1728785, ILMN_1711208, ILMN_1773109	689	46	16659	2.6281	1	0.856952	87.2335
INTERPRO	IPR017983:GPCR, family 2, secretin-like, conserved site	5	0.637755	0.135529	ILMN_1729075, ILMN_1697548, ILMN_1728785, ILMN_1711208, ILMN_1773109	689	48	16659	2.5186	1	0.871786	90.2238
PUBMED_ID	15203201	3	0.382653	0.178486	ILMN_1697548, ILMN_1728785, ILMN_1773109	783	27	27491	3.90109	1	1	98.4144
UP_SEQ_FEATURE	domain:GPS	4	0.510204	0.179079	ILMN_1697548, ILMN_1728785, ILMN_1711208, ILMN_1773109	778	36	19113	2.72965	1	0.990226	96.6495
INTERPRO	IPR000203:GPS	4	0.510204	0.206214	ILMN_1697548, ILMN_1728785, ILMN_1711208, ILMN_1773109	689	38	16659	2.54511	1	0.938375	97.4957
INTERPRO	IPR017981:GPCR, family 2-like	5	0.637755	0.226171	ILMN_1729075, ILMN_1697548, ILMN_1728785, ILMN_1711208, ILMN_1773109	689	59	16659	2.04903	1	0.946662	98.3323
SMART	SM00303:GPS	4	0.510204	0.243891	ILMN_1697548, ILMN_1728785, ILMN_1711208, ILMN_1773109	410	38	9079	2.33094	1	0.802995	97.1148
PIR_SUPERFAMILY	PIRSF800007:secretin receptor-like G protein-coupled receptors	4	0.510204	0.269554	ILMN_1697548, ILMN_1728785, ILMN_1711208, ILMN_1773109	319	42	7396	2.20809	1	1	98.6571
Annotation Cluster 94	Enrichment Score: 0.7679385222269538
Category	Term	Count	%	PValue	Genes	List Total	Pop Hits	Pop Total	Fold Enrichment	Bonferroni	Benjamini	FDR
GOTERM_BP_FAT	GO:0048512~circadian behavior	3	0.382653	0.11449	ILMN_1740508, ILMN_1668035, ILMN_1765558	568	14	13528	5.10362	1	0.747119	88.3806
GOTERM_BP_FAT	GO:0007622~rhythmic behavior	3	0.382653	0.143056	ILMN_1740508, ILMN_1668035, ILMN_1765558	568	16	13528	4.46567	1	0.808229	93.4976
GOTERM_BP_FAT	GO:0007623~circadian rhythm	4	0.510204	0.303326	ILMN_1712475, ILMN_1740508, ILMN_1668035, ILMN_1765558	568	46	13528	2.07103	1	0.943133	99.8336
Annotation Cluster 95	Enrichment Score: 0.7611968829324325
Category	Term	Count	%	PValue	Genes	List Total	Pop Hits	Pop Total	Fold Enrichment	Bonferroni	Benjamini	FDR
UP_SEQ_FEATURE	domain:PID	4	0.510204	0.103489	ILMN_1802690, ILMN_1813208, ILMN_1799115, ILMN_1770905	778	28	19113	3.50955	1	0.949089	84.743
INTERPRO	IPR006020:Phosphotyrosine interaction region	4	0.510204	0.206214	ILMN_1802690, ILMN_1813208, ILMN_1799115, ILMN_1770905	689	38	16659	2.54511	1	0.938375	97.4957
SMART	SM00462:PTB	4	0.510204	0.243891	ILMN_1802690, ILMN_1813208, ILMN_1799115, ILMN_1770905	410	38	9079	2.33094	1	0.802995	97.1148
Annotation Cluster 96	Enrichment Score: 0.7531627463061948
Category	Term	Count	%	PValue	Genes	List Total	Pop Hits	Pop Total	Fold Enrichment	Bonferroni	Benjamini	FDR
GOTERM_BP_FAT	GO:0051412~response to corticosterone stimulus	3	0.382653	0.143056	ILMN_1771800, ILMN_1708275, ILMN_1659086	568	16	13528	4.46567	1	0.808229	93.4976
GOTERM_BP_FAT	GO:0031960~response to corticosteroid stimulus	7	0.892857	0.14591	ILMN_1771800, ILMN_1701603, ILMN_1740508, ILMN_1708275, ILMN_1659086, ILMN_1725193, ILMN_1710859	568	85	13528	1.96139	1	0.813656	93.8704
GOTERM_BP_FAT	GO:0051385~response to mineralocorticoid stimulus	3	0.382653	0.203631	ILMN_1771800, ILMN_1708275, ILMN_1659086	568	20	13528	3.57254	1	0.885367	98.2239
GOTERM_BP_FAT	GO:0051384~response to glucocorticoid stimulus	6	0.765306	0.228514	ILMN_1771800, ILMN_1701603, ILMN_1708275, ILMN_1659086, ILMN_1725193, ILMN_1710859	568	78	13528	1.83207	1	0.902744	98.9875
Annotation Cluster 97	Enrichment Score: 0.7483375400665535
Category	Term	Count	%	PValue	Genes	List Total	Pop Hits	Pop Total	Fold Enrichment	Bonferroni	Benjamini	FDR
GOTERM_CC_FAT	GO:0031093~platelet alpha granule lumen	5	0.637755	0.113802	ILMN_1654422, ILMN_1798892, ILMN_1675083, ILMN_1777190, ILMN_1736078	581	41	12782	2.68293	1	0.527579	80.9724
GOTERM_CC_FAT	GO:0060205~cytoplasmic membrane-bounded vesicle lumen	5	0.637755	0.137652	ILMN_1654422, ILMN_1798892, ILMN_1675083, ILMN_1777190, ILMN_1736078	581	44	12782	2.5	1	0.576802	86.9185
GOTERM_CC_FAT	GO:0031983~vesicle lumen	5	0.637755	0.154572	ILMN_1654422, ILMN_1798892, ILMN_1675083, ILMN_1777190, ILMN_1736078	581	46	12782	2.3913	1	0.594331	90.0353
GOTERM_CC_FAT	GO:0031091~platelet alpha granule	5	0.637755	0.248628	ILMN_1654422, ILMN_1798892, ILMN_1675083, ILMN_1777190, ILMN_1736078	581	56	12782	1.96429	1	0.732685	98.0276
GOTERM_CC_FAT	GO:0030141~secretory granule	11	1.40306	0.301091	ILMN_1674580, ILMN_1798892, ILMN_1675083, ILMN_1777190, ILMN_1757497, ILMN_1710859, ILMN_1736078, ILMN_1654422, ILMN_1695003, ILMN_1669355, ILMN_1724350, ILMN_1810235, ILMN_1654468	581	180	12782	1.34444	1	0.780682	99.2701
Annotation Cluster 98	Enrichment Score: 0.7414853020783179
Category	Term	Count	%	PValue	Genes	List Total	Pop Hits	Pop Total	Fold Enrichment	Bonferroni	Benjamini	FDR
GOTERM_BP_FAT	GO:0001501~skeletal system development	20	2.55102	0.0786446	ILMN_1701603, ILMN_1668675, ILMN_1814719, ILMN_1682738, ILMN_1738657, ILMN_1736096, ILMN_1707077, ILMN_1771800, ILMN_1759598, ILMN_1672611, ILMN_1668411, ILMN_1690125, ILMN_1729117, ILMN_1801205, ILMN_1789507, ILMN_1706960, ILMN_1718783, ILMN_1721626, ILMN_1672094, ILMN_1745578	568	319	13528	1.49322	1	0.644813	76.5433
GOTERM_BP_FAT	GO:0001503~ossification	8	1.02041	0.207651	ILMN_1672611, ILMN_1668411, ILMN_1690125, ILMN_1729117, ILMN_1801205, ILMN_1682738, ILMN_1738657, ILMN_1707077	568	115	13528	1.65683	1	0.888074	98.3761
GOTERM_BP_FAT	GO:0001649~osteoblast differentiation	4	0.510204	0.257239	ILMN_1668411, ILMN_1801205, ILMN_1682738, ILMN_1738657	568	42	13528	2.26828	1	0.922346	99.4828
GOTERM_BP_FAT	GO:0060348~bone development	8	1.02041	0.257466	ILMN_1672611, ILMN_1668411, ILMN_1690125, ILMN_1729117, ILMN_1801205, ILMN_1682738, ILMN_1738657, ILMN_1707077	568	123	13528	1.54907	1	0.921889	99.4856
Annotation Cluster 99	Enrichment Score: 0.7392940591939223
Category	Term	Count	%	PValue	Genes	List Total	Pop Hits	Pop Total	Fold Enrichment	Bonferroni	Benjamini	FDR
PIR_SUPERFAMILY	PIRSF037169:small GTPase, Rho type	3	0.382653	0.134019	ILMN_1810559, ILMN_1651838, ILMN_1759513	319	15	7396	4.63699	1	0.999997	86.1183
INTERPRO	IPR003578:Ras small GTPase, Rho type	3	0.382653	0.199121	ILMN_1810559, ILMN_1651838, ILMN_1759513	689	20	16659	3.62678	1	0.933427	97.1135
SMART	SM00174:RHO	3	0.382653	0.2269	ILMN_1810559, ILMN_1651838, ILMN_1759513	410	20	9079	3.32159	1	0.78496	96.1755
Annotation Cluster 100	Enrichment Score: 0.7340116012598794
Category	Term	Count	%	PValue	Genes	List Total	Pop Hits	Pop Total	Fold Enrichment	Bonferroni	Benjamini	FDR
GOTERM_BP_FAT	GO:0048592~eye morphogenesis	7	0.892857	0.0686946	ILMN_1779875, ILMN_1729117, ILMN_1681777, ILMN_1671151, ILMN_1814719, ILMN_1727633, ILMN_1746658	568	69	13528	2.41621	1	0.611603	71.6308
GOTERM_BP_FAT	GO:0060042~retina morphogenesis in camera-type eye	3	0.382653	0.128585	ILMN_1779875, ILMN_1814719, ILMN_1727633	568	15	13528	4.76338	1	0.777653	91.2538
GOTERM_BP_FAT	GO:0060041~retina development in camera-type eye	4	0.510204	0.179807	ILMN_1779875, ILMN_1807610, ILMN_1814719, ILMN_1727633	568	35	13528	2.72193	1	0.866253	97.0071
GOTERM_BP_FAT	GO:0001654~eye development	9	1.14796	0.189651	ILMN_1665761, ILMN_1779875, ILMN_1729117, ILMN_1807610, ILMN_1681777, ILMN_1671151, ILMN_1814719, ILMN_1727633, ILMN_1746658	568	132	13528	1.62388	1	0.87471	97.5832
GOTERM_BP_FAT	GO:0048593~camera-type eye morphogenesis	4	0.510204	0.280195	ILMN_1779875, ILMN_1681777, ILMN_1814719, ILMN_1727633	568	44	13528	2.16517	1	0.935622	99.7033
GOTERM_BP_FAT	GO:0043010~camera-type eye development	6	0.765306	0.467298	ILMN_1665761, ILMN_1779875, ILMN_1807610, ILMN_1681777, ILMN_1814719, ILMN_1727633	568	107	13528	1.33553	1	0.982382	99.9986
Annotation Cluster 101	Enrichment Score: 0.7284237048459741
Category	Term	Count	%	PValue	Genes	List Total	Pop Hits	Pop Total	Fold Enrichment	Bonferroni	Benjamini	FDR
GOTERM_BP_FAT	GO:0032102~negative regulation of response to external stimulus	6	0.765306	0.0573141	ILMN_1758400, ILMN_1712943, ILMN_1749662, ILMN_1685078, ILMN_1796901, ILMN_1697220	568	50	13528	2.85803	1	0.572607	64.8256
GOTERM_BP_FAT	GO:0048585~negative regulation of response to stimulus	8	1.02041	0.126314	ILMN_1771800, ILMN_1758400, ILMN_1712943, ILMN_1749662, ILMN_1668035, ILMN_1685078, ILMN_1796901, ILMN_1697220	568	100	13528	1.90535	1	0.772669	90.8412
GOTERM_BP_FAT	GO:0050728~negative regulation of inflammatory response	3	0.382653	0.375288	ILMN_1749662, ILMN_1685078, ILMN_1697220	568	31	13528	2.30486	1	0.965899	99.9758
GOTERM_BP_FAT	GO:0031348~negative regulation of defense response	3	0.382653	0.448982	ILMN_1749662, ILMN_1685078, ILMN_1697220	568	36	13528	1.98474	1	0.979751	99.9974
Annotation Cluster 102	Enrichment Score: 0.7160528256212625
Category	Term	Count	%	PValue	Genes	List Total	Pop Hits	Pop Total	Fold Enrichment	Bonferroni	Benjamini	FDR
SP_PIR_KEYWORDS	cyclin	5	0.637755	0.14247	ILMN_1667081, ILMN_1726415, ILMN_1770623, ILMN_1708991, ILMN_1717803	778	50	19235	2.47237	1	0.641344	88.8315
INTERPRO	IPR006671:Cyclin, N-terminal	4	0.510204	0.154167	ILMN_1667081, ILMN_1726415, ILMN_1770623, ILMN_1708991	689	33	16659	2.93073	1	0.896987	93.0969
INTERPRO	IPR013763:Cyclin-related	4	0.510204	0.195488	ILMN_1667081, ILMN_1726415, ILMN_1770623, ILMN_1717803	689	37	16659	2.61389	1	0.931737	96.8972
INTERPRO	IPR006670:Cyclin	4	0.510204	0.228041	ILMN_1667081, ILMN_1726415, ILMN_1770623, ILMN_1708991	689	40	16659	2.41785	1	0.946493	98.3955
SMART	SM00385:CYCLIN	4	0.510204	0.268467	ILMN_1667081, ILMN_1726415, ILMN_1770623, ILMN_1708991	410	40	9079	2.21439	1	0.813681	98.1025
Annotation Cluster 103	Enrichment Score: 0.7109771697701807
Category	Term	Count	%	PValue	Genes	List Total	Pop Hits	Pop Total	Fold Enrichment	Bonferroni	Benjamini	FDR
GOTERM_MF_FAT	GO:0016849~phosphorus-oxygen lyase activity	4	0.510204	0.0660315	ILMN_1808590, ILMN_1746027, ILMN_1708588, ILMN_1810691	558	22	12983	4.23037	1	0.690095	64.9933
GOTERM_MF_FAT	GO:0009975~cyclase activity	4	0.510204	0.0736114	ILMN_1808590, ILMN_1746027, ILMN_1708588, ILMN_1810691	558	23	12983	4.04644	1	0.715696	69.1131
GOTERM_BP_FAT	GO:0009123~nucleoside monophosphate metabolic process	6	0.765306	0.142516	ILMN_1808590, ILMN_1659197, ILMN_1708588, ILMN_1697220, ILMN_1673991, ILMN_1810691	568	66	13528	2.16517	1	0.80825	93.4246
INTERPRO	IPR018297:Adenylyl cyclase class-3/4/guanylyl cyclase, conserved site	3	0.382653	0.168954	ILMN_1808590, ILMN_1708588, ILMN_1810691	689	18	16659	4.02975	1	0.908617	94.7911
INTERPRO	IPR001054:Adenylyl cyclase class-3/4/guanylyl cyclase	3	0.382653	0.168954	ILMN_1808590, ILMN_1708588, ILMN_1810691	689	18	16659	4.02975	1	0.908617	94.7911
SMART	SM00044:CYCc	3	0.382653	0.193371	ILMN_1808590, ILMN_1708588, ILMN_1810691	410	18	9079	3.69065	1	0.743049	93.4474
GOTERM_BP_FAT	GO:0009187~cyclic nucleotide metabolic process	4	0.510204	0.212268	ILMN_1808590, ILMN_1659197, ILMN_1708588, ILMN_1810691	568	38	13528	2.50704	1	0.892325	98.5357
GOTERM_BP_FAT	GO:0046058~cAMP metabolic process	3	0.382653	0.219215	ILMN_1659197, ILMN_1708588, ILMN_1810691	568	21	13528	3.40241	1	0.895878	98.7482
GOTERM_BP_FAT	GO:0009190~cyclic nucleotide biosynthetic process	3	0.382653	0.282158	ILMN_1808590, ILMN_1708588, ILMN_1810691	568	25	13528	2.85803	1	0.935943	99.7173
GOTERM_BP_FAT	GO:0009124~nucleoside monophosphate biosynthetic process	4	0.510204	0.349742	ILMN_1808590, ILMN_1708588, ILMN_1673991, ILMN_1810691	568	50	13528	1.90535	1	0.959886	99.9509
SP_PIR_KEYWORDS	lyase	4	0.510204	0.860537	ILMN_1808590, ILMN_1797384, ILMN_1708588, ILMN_1810691	778	118	19235	0.83809	1	0.996211	100
Annotation Cluster 104	Enrichment Score: 0.7035808699056865
Category	Term	Count	%	PValue	Genes	List Total	Pop Hits	Pop Total	Fold Enrichment	Bonferroni	Benjamini	FDR
GOTERM_BP_FAT	GO:0001558~regulation of cell growth	15	1.91327	0.0338665	ILMN_1765641, ILMN_1766925, ILMN_1769891, ILMN_1776708, ILMN_1682738, ILMN_1774945, ILMN_1725193, ILMN_1764043, ILMN_1671843, ILMN_1665219, ILMN_1746359, ILMN_1699574, ILMN_1691648, ILMN_1733421, ILMN_1722809	568	194	13528	1.84151	1	0.44253	45.6603
GOTERM_BP_FAT	GO:0032535~regulation of cellular component size	17	2.16837	0.106378	ILMN_1765641, ILMN_1809632, ILMN_1792409, ILMN_1776708, ILMN_1730845, ILMN_1769891, ILMN_1659086, ILMN_1682738, ILMN_1676422, ILMN_1812392, ILMN_1671686, ILMN_1671843, ILMN_1746359, ILMN_1699574, ILMN_1691648, ILMN_1681777, ILMN_1679754	568	271	13528	1.49405	1	0.727534	86.345
GOTERM_BP_FAT	GO:0008361~regulation of cell size	12	1.53061	0.247018	ILMN_1765641, ILMN_1792409, ILMN_1699574, ILMN_1746359, ILMN_1776708, ILMN_1769891, ILMN_1691648, ILMN_1730845, ILMN_1679754, ILMN_1682738, ILMN_1676422, ILMN_1671843	568	206	13528	1.38739	1	0.915499	99.3412
GOTERM_BP_FAT	GO:0030308~negative regulation of cell growth	6	0.765306	0.34229	ILMN_1765641, ILMN_1699574, ILMN_1746359, ILMN_1691648, ILMN_1682738, ILMN_1671843	568	92	13528	1.55328	1	0.957897	99.9399
GOTERM_BP_FAT	GO:0045792~negative regulation of cell size	6	0.765306	0.401002	ILMN_1765641, ILMN_1699574, ILMN_1746359, ILMN_1691648, ILMN_1682738, ILMN_1671843	568	99	13528	1.44345	1	0.972139	99.9885
GOTERM_BP_FAT	GO:0045926~negative regulation of growth	6	0.765306	0.491612	ILMN_1765641, ILMN_1699574, ILMN_1746359, ILMN_1691648, ILMN_1682738, ILMN_1671843	568	110	13528	1.2991	1	0.98489	99.9994
Annotation Cluster 105	Enrichment Score: 0.6994410916193113
Category	Term	Count	%	PValue	Genes	List Total	Pop Hits	Pop Total	Fold Enrichment	Bonferroni	Benjamini	FDR
GOTERM_BP_FAT	GO:0032956~regulation of actin cytoskeleton organization	9	1.14796	0.0328751	ILMN_1810559, ILMN_1792409, ILMN_1681777, ILMN_1790270, ILMN_1682738, ILMN_1673521, ILMN_1733421, ILMN_1812392, ILMN_1671686	568	89	13528	2.40845	1	0.437019	44.6647
GOTERM_BP_FAT	GO:0032970~regulation of actin filament-based process	9	1.14796	0.0389278	ILMN_1810559, ILMN_1792409, ILMN_1681777, ILMN_1790270, ILMN_1682738, ILMN_1673521, ILMN_1733421, ILMN_1812392, ILMN_1671686	568	92	13528	2.32991	1	0.474698	50.4852
GOTERM_BP_FAT	GO:0043244~regulation of protein complex disassembly	5	0.637755	0.164568	ILMN_1772366, ILMN_1681777, ILMN_1735151, ILMN_1671686, ILMN_1735735	568	51	13528	2.33499	1	0.84574	95.8541
GOTERM_BP_FAT	GO:0051494~negative regulation of cytoskeleton organization	5	0.637755	0.198307	ILMN_1772366, ILMN_1681777, ILMN_1812392, ILMN_1671686, ILMN_1735735	568	55	13528	2.16517	1	0.880707	98.0016
GOTERM_BP_FAT	GO:0043242~negative regulation of protein complex disassembly	4	0.510204	0.245858	ILMN_1772366, ILMN_1681777, ILMN_1671686, ILMN_1735735	568	41	13528	2.3236	1	0.915069	99.323
GOTERM_BP_FAT	GO:0010639~negative regulation of organelle organization	5	0.637755	0.451979	ILMN_1772366, ILMN_1681777, ILMN_1812392, ILMN_1671686, ILMN_1735735	568	82	13528	1.45225	1	0.980265	99.9976
GOTERM_BP_FAT	GO:0008064~regulation of actin polymerization or depolymerization	3	0.382653	0.731415	ILMN_1681777, ILMN_1812392, ILMN_1671686	568	61	13528	1.17132	1	0.998309	100
GOTERM_BP_FAT	GO:0030832~regulation of actin filament length	3	0.382653	0.747642	ILMN_1681777, ILMN_1812392, ILMN_1671686	568	63	13528	1.13414	1	0.998653	100
Annotation Cluster 106	Enrichment Score: 0.6780407918918203
Category	Term	Count	%	PValue	Genes	List Total	Pop Hits	Pop Total	Fold Enrichment	Bonferroni	Benjamini	FDR
INTERPRO	IPR018159:Spectrin/alpha-actinin	4	0.510204	0.134667	ILMN_1654422, ILMN_1798892, ILMN_1752750, ILMN_1707798	689	31	16659	3.11981	1	0.873416	90.0671
SMART	SM00150:SPEC	4	0.510204	0.16194	ILMN_1654422, ILMN_1798892, ILMN_1752750, ILMN_1707798	410	31	9079	2.85728	1	0.694856	89.3597
UP_SEQ_FEATURE	repeat:Spectrin 4	3	0.382653	0.209417	ILMN_1654422, ILMN_1798892, ILMN_1707798	778	21	19113	3.50955	1	0.992825	98.2475
INTERPRO	IPR002017:Spectrin repeat	3	0.382653	0.214435	ILMN_1654422, ILMN_1798892, ILMN_1707798	689	21	16659	3.45407	1	0.942098	97.8792
UP_SEQ_FEATURE	repeat:Spectrin 3	3	0.382653	0.224556	ILMN_1654422, ILMN_1798892, ILMN_1707798	778	22	19113	3.35002	1	0.994081	98.7436
UP_SEQ_FEATURE	repeat:Spectrin 2	3	0.382653	0.285584	ILMN_1654422, ILMN_1798892, ILMN_1707798	778	26	19113	2.83464	1	0.997901	99.6935
UP_SEQ_FEATURE	repeat:Spectrin 1	3	0.382653	0.285584	ILMN_1654422, ILMN_1798892, ILMN_1707798	778	26	19113	2.83464	1	0.997901	99.6935
Annotation Cluster 107	Enrichment Score: 0.673856040363412
Category	Term	Count	%	PValue	Genes	List Total	Pop Hits	Pop Total	Fold Enrichment	Bonferroni	Benjamini	FDR
GOTERM_BP_FAT	GO:0030705~cytoskeleton-dependent intracellular transport	5	0.637755	0.172802	ILMN_1809632, ILMN_1664071, ILMN_1659086, ILMN_1757387, ILMN_1669714	568	52	13528	2.29009	1	0.856407	96.5209
GOTERM_BP_FAT	GO:0008088~axon cargo transport	3	0.382653	0.172904	ILMN_1809632, ILMN_1659086, ILMN_1757387	568	18	13528	3.96948	1	0.855483	96.5285
GOTERM_BP_FAT	GO:0007018~microtubule-based movement	8	1.02041	0.195807	ILMN_1791726, ILMN_1809632, ILMN_1666625, ILMN_1715203, ILMN_1812254, ILMN_1659086, ILMN_1757387, ILMN_1780769	568	113	13528	1.68615	1	0.879002	97.8883
GOTERM_BP_FAT	GO:0010970~microtubule-based transport	3	0.382653	0.344663	ILMN_1809632, ILMN_1659086, ILMN_1757387	568	29	13528	2.46382	1	0.957874	99.9436
Annotation Cluster 108	Enrichment Score: 0.6724866546810189
Category	Term	Count	%	PValue	Genes	List Total	Pop Hits	Pop Total	Fold Enrichment	Bonferroni	Benjamini	FDR
GOTERM_MF_FAT	GO:0016291~acyl-CoA thioesterase activity	3	0.382653	0.0912584	ILMN_1764321, ILMN_1797336, ILMN_1740265	558	12	12983	5.81676	1	0.753984	77.0157
GOTERM_MF_FAT	GO:0016289~CoA hydrolase activity	3	0.382653	0.163803	ILMN_1764321, ILMN_1797336, ILMN_1740265	558	17	12983	4.10595	1	0.87627	93.5988
GOTERM_MF_FAT	GO:0016790~thiolester hydrolase activity	5	0.637755	0.642606	ILMN_1698885, ILMN_1764321, ILMN_1797336, ILMN_1740265, ILMN_1757387	558	102	12983	1.14054	1	0.99697	100
Annotation Cluster 109	Enrichment Score: 0.6719247024528137
Category	Term	Count	%	PValue	Genes	List Total	Pop Hits	Pop Total	Fold Enrichment	Bonferroni	Benjamini	FDR
GOTERM_BP_FAT	GO:0048545~response to steroid hormone stimulus	12	1.53061	0.183149	ILMN_1771800, ILMN_1667081, ILMN_1701603, ILMN_1658835, ILMN_1740508, ILMN_1812824, ILMN_1708275, ILMN_1659086, ILMN_1718046, ILMN_1725193, ILMN_1710859, ILMN_1799878	568	192	13528	1.48856	1	0.869608	97.2158
GOTERM_BP_FAT	GO:0032355~response to estradiol stimulus	5	0.637755	0.189679	ILMN_1771800, ILMN_1667081, ILMN_1718046, ILMN_1725193, ILMN_1799878	568	54	13528	2.20527	1	0.873755	97.5846
GOTERM_BP_FAT	GO:0043627~response to estrogen stimulus	7	0.892857	0.277589	ILMN_1771800, ILMN_1667081, ILMN_1658835, ILMN_1740508, ILMN_1718046, ILMN_1725193, ILMN_1799878	568	105	13528	1.58779	1	0.934233	99.6837
Annotation Cluster 110	Enrichment Score: 0.6570199336419478
Category	Term	Count	%	PValue	Genes	List Total	Pop Hits	Pop Total	Fold Enrichment	Bonferroni	Benjamini	FDR
PUBMED_ID	2649653	4	0.510204	0.12293	ILMN_1709907, ILMN_1802654, ILMN_1768510, ILMN_1704904	783	43	27491	3.26603	1	1	93.7015
PUBMED_ID	2542563	3	0.382653	0.199204	ILMN_1709907, ILMN_1768510, ILMN_1704904	783	29	27491	3.63205	1	1	99.0745
PUBMED_ID	2541446	3	0.382653	0.273188	ILMN_1709907, ILMN_1768510, ILMN_1704904	783	36	27491	2.92582	1	1	99.8801
PUBMED_ID	2187500	3	0.382653	0.273188	ILMN_1709907, ILMN_1768510, ILMN_1704904	783	36	27491	2.92582	1	1	99.8801
PUBMED_ID	2829950	3	0.382653	0.283804	ILMN_1709907, ILMN_1768510, ILMN_1704904	783	37	27491	2.84674	1	1	99.912
Annotation Cluster 111	Enrichment Score: 0.6562919775102284
Category	Term	Count	%	PValue	Genes	List Total	Pop Hits	Pop Total	Fold Enrichment	Bonferroni	Benjamini	FDR
GOTERM_MF_FAT	GO:0015035~protein disulfide oxidoreductase activity	3	0.382653	0.119027	ILMN_1737163, ILMN_1725241, ILMN_1680727	558	14	12983	4.98579	1	0.802362	85.7326
GOTERM_MF_FAT	GO:0015036~disulfide oxidoreductase activity	3	0.382653	0.179322	ILMN_1737163, ILMN_1725241, ILMN_1680727	558	18	12983	3.87784	1	0.890551	95.1998
GOTERM_MF_FAT	GO:0016667~oxidoreductase activity, acting on sulfur group of donors	3	0.382653	0.503322	ILMN_1737163, ILMN_1725241, ILMN_1680727	558	39	12983	1.78977	1	0.990548	99.9979
Annotation Cluster 112	Enrichment Score: 0.6533601359798773
Category	Term	Count	%	PValue	Genes	List Total	Pop Hits	Pop Total	Fold Enrichment	Bonferroni	Benjamini	FDR
GOTERM_BP_FAT	GO:0007423~sensory organ development	15	1.91327	0.101766	ILMN_1665761, ILMN_1779875, ILMN_1726745, ILMN_1814719, ILMN_1727633, ILMN_1740508, ILMN_1759598, ILMN_1729117, ILMN_1807610, ILMN_1671151, ILMN_1789507, ILMN_1681777, ILMN_1764709, ILMN_1788291, ILMN_1746658	568	229	13528	1.56006	1	0.717305	85.042
GOTERM_BP_FAT	GO:0048568~embryonic organ development	11	1.40306	0.185891	ILMN_1759598, ILMN_1671151, ILMN_1789507, ILMN_1690807, ILMN_1726745, ILMN_1814719, ILMN_1764709, ILMN_1724832, ILMN_1738657, ILMN_1693014, ILMN_1788291	568	172	13528	1.52317	1	0.871909	97.3767
GOTERM_BP_FAT	GO:0048562~embryonic organ morphogenesis	9	1.14796	0.194977	ILMN_1759598, ILMN_1671151, ILMN_1789507, ILMN_1726745, ILMN_1814719, ILMN_1764709, ILMN_1724832, ILMN_1738657, ILMN_1788291	568	133	13528	1.61167	1	0.878753	97.8494
GOTERM_BP_FAT	GO:0042472~inner ear morphogenesis	5	0.637755	0.207052	ILMN_1759598, ILMN_1789507, ILMN_1726745, ILMN_1764709, ILMN_1788291	568	56	13528	2.12651	1	0.888173	98.3542
GOTERM_BP_FAT	GO:0043583~ear development	7	0.892857	0.207983	ILMN_1740508, ILMN_1759598, ILMN_1681777, ILMN_1789507, ILMN_1726745, ILMN_1764709, ILMN_1788291	568	95	13528	1.75493	1	0.887621	98.3881
GOTERM_BP_FAT	GO:0048839~inner ear development	6	0.765306	0.236289	ILMN_1740508, ILMN_1759598, ILMN_1789507, ILMN_1726745, ILMN_1764709, ILMN_1788291	568	79	13528	1.80888	1	0.908197	99.1537
GOTERM_BP_FAT	GO:0042471~ear morphogenesis	5	0.637755	0.299254	ILMN_1759598, ILMN_1789507, ILMN_1726745, ILMN_1764709, ILMN_1788291	568	66	13528	1.80431	1	0.942499	99.8155
GOTERM_BP_FAT	GO:0048598~embryonic morphogenesis	14	1.78571	0.528065	ILMN_1792409, ILMN_1726745, ILMN_1814719, ILMN_1682738, ILMN_1740623, ILMN_1738657, ILMN_1759598, ILMN_1676449, ILMN_1671151, ILMN_1789507, ILMN_1764709, ILMN_1724832, ILMN_1788291, ILMN_1703487	568	307	13528	1.08611	1	0.988562	99.9998
Annotation Cluster 113	Enrichment Score: 0.6400557644755056
Category	Term	Count	%	PValue	Genes	List Total	Pop Hits	Pop Total	Fold Enrichment	Bonferroni	Benjamini	FDR
GOTERM_CC_FAT	GO:0042641~actomyosin	4	0.510204	0.12176	ILMN_1792409, ILMN_1690125, ILMN_1703558, ILMN_1769926	581	27	12782	3.25926	1	0.54114	83.1895
GOTERM_CC_FAT	GO:0001725~stress fiber	3	0.382653	0.297674	ILMN_1792409, ILMN_1690125, ILMN_1703558	581	24	12782	2.75	1	0.780057	99.2195
GOTERM_CC_FAT	GO:0032432~actin filament bundle	3	0.382653	0.33158	ILMN_1792409, ILMN_1690125, ILMN_1703558	581	26	12782	2.53846	1	0.807561	99.6044
Annotation Cluster 114	Enrichment Score: 0.614294504297609
Category	Term	Count	%	PValue	Genes	List Total	Pop Hits	Pop Total	Fold Enrichment	Bonferroni	Benjamini	FDR
SP_PIR_KEYWORDS	Secreted	79	10.0765	0.116675	ILMN_1678812, ILMN_1658356, ILMN_1765620, ILMN_1695108, ILMN_1652512, ILMN_1678816, ILMN_1685078, ILMN_1740250, ILMN_1688886, ILMN_1730645, ILMN_1774945, ILMN_1731062, ILMN_1725193, ILMN_1770454, ILMN_1793360, ILMN_1713686, ILMN_1663112, ILMN_1745817, ILMN_1676449, ILMN_1758418, ILMN_1663263, ILMN_1770128, ILMN_1797776, ILMN_1747019, ILMN_1712943, ILMN_1675083, ILMN_1713471, ILMN_1708987, ILMN_17…	778	1689	19235	1.15641	1	0.595567	82.9564
GOTERM_CC_FAT	GO:0044421~extracellular region part	48	6.12245	0.311011	ILMN_1678812, ILMN_1678816, ILMN_1766925, ILMN_1685078, ILMN_1688886, ILMN_1731062, ILMN_1725193, ILMN_1671318, ILMN_1770454, ILMN_1713686, ILMN_1663112, ILMN_1758418, ILMN_1676449, ILMN_1663685, ILMN_1763834, ILMN_1712943, ILMN_1675083, ILMN_1713471, ILMN_1658643, ILMN_1710859, ILMN_1815319, ILMN_1695003, ILMN_1761312, ILMN_1793006, ILMN_1806667, ILMN_1723978, ILMN_1769615, ILMN_1654072, ILMN_17…	581	960	12782	1.1	1	0.789744	99.4002
GOTERM_CC_FAT	GO:0005576~extracellular region	95	12.1173	0.395695	ILMN_1658356, ILMN_1765620, ILMN_1766925, ILMN_1688886, ILMN_1769245, ILMN_1713686, ILMN_1663112, ILMN_1663685, ILMN_1663263, ILMN_1763834, ILMN_1712943, ILMN_1713471, ILMN_1708987, ILMN_1710859, ILMN_1695003, ILMN_1793006, ILMN_1806667, ILMN_1699768, ILMN_1756501, ILMN_1765641, ILMN_1702199, ILMN_1745570, ILMN_1654072, ILMN_1668035, ILMN_1671766, ILMN_1736078, ILMN_1651708, ILMN_1712283, ILMN_17…	581	2010	12782	1.0398	1	0.842801	99.901
Annotation Cluster 115	Enrichment Score: 0.6141530624833814
Category	Term	Count	%	PValue	Genes	List Total	Pop Hits	Pop Total	Fold Enrichment	Bonferroni	Benjamini	FDR
INTERPRO	IPR003129:Laminin G, thrombospondin-type, N-terminal	3	0.382653	0.229851	ILMN_1745817, ILMN_1789507, ILMN_1736078	689	22	16659	3.29707	1	0.946284	98.4545
UP_SEQ_FEATURE	domain:TSP N-terminal	3	0.382653	0.239772	ILMN_1745817, ILMN_1789507, ILMN_1736078	778	23	19113	3.20437	1	0.995577	99.1067
SMART	SM00210:TSPN	3	0.382653	0.260792	ILMN_1745817, ILMN_1789507, ILMN_1736078	410	22	9079	3.01962	1	0.810969	97.834
Annotation Cluster 116	Enrichment Score: 0.6059396144044873
Category	Term	Count	%	PValue	Genes	List Total	Pop Hits	Pop Total	Fold Enrichment	Bonferroni	Benjamini	FDR
PUBMED_ID	18513529	3	0.382653	0.0512227	ILMN_1654422, ILMN_1664071, ILMN_1669714	783	13	27491	8.10227	1	0.999893	66.9893
GOTERM_CC_FAT	GO:0044449~contractile fiber part	9	1.14796	0.141274	ILMN_1654422, ILMN_1664071, ILMN_1716407, ILMN_1798892, ILMN_1660775, ILMN_1668411, ILMN_1703558, ILMN_1712075, ILMN_1669714	581	113	12782	1.75221	1	0.581181	87.6532
GOTERM_CC_FAT	GO:0030017~sarcomere	8	1.02041	0.15683	ILMN_1654422, ILMN_1664071, ILMN_1716407, ILMN_1798892, ILMN_1660775, ILMN_1668411, ILMN_1703558, ILMN_1669714	581	98	12782	1.79592	1	0.594691	90.3946
GOTERM_BP_FAT	GO:0003012~muscle system process	8	1.02041	0.560695	ILMN_1654422, ILMN_1808590, ILMN_1664071, ILMN_1740508, ILMN_1779823, ILMN_1710410, ILMN_1752075, ILMN_1669714	568	168	13528	1.13414	1	0.991017	100
SP_PIR_KEYWORDS	Cardiomyopathy	3	0.382653	0.582942	ILMN_1654422, ILMN_1664071, ILMN_1669714	778	48	19235	1.54523	1	0.961889	99.9996
GOTERM_BP_FAT	GO:0006936~muscle contraction	7	0.892857	0.623817	ILMN_1654422, ILMN_1664071, ILMN_1740508, ILMN_1779823, ILMN_1710410, ILMN_1752075, ILMN_1669714	568	153	13528	1.08966	1	0.994757	100
Annotation Cluster 117	Enrichment Score: 0.6001548039340268
Category	Term	Count	%	PValue	Genes	List Total	Pop Hits	Pop Total	Fold Enrichment	Bonferroni	Benjamini	FDR
GOTERM_BP_FAT	GO:0007266~Rho protein signal transduction	4	0.510204	0.212268	ILMN_1734742, ILMN_1678143, ILMN_1766925, ILMN_1776708	568	38	13528	2.50704	1	0.892325	98.5357
GOTERM_BP_FAT	GO:0007162~negative regulation of cell adhesion	4	0.510204	0.268689	ILMN_1734742, ILMN_1678143, ILMN_1651838, ILMN_1766925	568	43	13528	2.21553	1	0.928372	99.6071
GOTERM_BP_FAT	GO:0007265~Ras protein signal transduction	7	0.892857	0.277589	ILMN_1734742, ILMN_1678143, ILMN_1766925, ILMN_1776708, ILMN_1676358, ILMN_1770905, ILMN_1698307	568	105	13528	1.58779	1	0.934233	99.6837
Annotation Cluster 118	Enrichment Score: 0.5911622099655012
Category	Term	Count	%	PValue	Genes	List Total	Pop Hits	Pop Total	Fold Enrichment	Bonferroni	Benjamini	FDR
UP_SEQ_FEATURE	binding site:NADP	4	0.510204	0.103489	ILMN_1705849, ILMN_1751753, ILMN_1736042, ILMN_1709814	778	28	19113	3.50955	1	0.949089	84.743
INTERPRO	IPR016040:NAD(P)-binding domain	9	1.14796	0.280246	ILMN_1790978, ILMN_1740508, ILMN_1705849, ILMN_1713756, ILMN_1672389, ILMN_1736042, ILMN_1708987, ILMN_1692163, ILMN_1709814	689	150	16659	1.45071	1	0.968797	99.4754
UP_SEQ_FEATURE	nucleotide phosphate-binding region:NADP	5	0.637755	0.335996	ILMN_1705849, ILMN_1751753, ILMN_1736042, ILMN_1708987, ILMN_1709814	778	72	19113	1.70603	1	0.998974	99.913
SP_PIR_KEYWORDS	nadp	8	1.02041	0.443181	ILMN_1720282, ILMN_1697433, ILMN_1705849, ILMN_1713756, ILMN_1751753, ILMN_1672389, ILMN_1736042, ILMN_1708987	778	156	19235	1.26788	1	0.916739	99.9764
Annotation Cluster 119	Enrichment Score: 0.5795649502243307
Category	Term	Count	%	PValue	Genes	List Total	Pop Hits	Pop Total	Fold Enrichment	Bonferroni	Benjamini	FDR
GOTERM_MF_FAT	GO:0005003~ephrin receptor activity	4	0.510204	0.0341021	ILMN_1695606, ILMN_1802646, ILMN_1663263, ILMN_1668022	558	17	12983	5.47459	1	0.520948	41.3232
GOTERM_MF_FAT	GO:0004714~transmembrane receptor protein tyrosine kinase activity	7	0.892857	0.0669805	ILMN_1686623, ILMN_1699574, ILMN_1695606, ILMN_1802646, ILMN_1753135, ILMN_1663263, ILMN_1668022	558	67	12983	2.43088	1	0.687813	65.5358
INTERPRO	IPR013761:Sterile alpha motif-type	7	0.892857	0.0983071	ILMN_1806320, ILMN_1789596, ILMN_1799115, ILMN_1679460, ILMN_1802646, ILMN_1745578, ILMN_1663263, ILMN_1705384, ILMN_1668022	689	77	16659	2.19805	1	0.813127	80.8365
INTERPRO	IPR001090:Ephrin receptor, ligand binding	3	0.382653	0.111711	ILMN_1802646, ILMN_1663263, ILMN_1668022	689	14	16659	5.18111	1	0.836659	84.9122
INTERPRO	IPR001426:Receptor tyrosine kinase, class V, conserved site	3	0.382653	0.111711	ILMN_1802646, ILMN_1663263, ILMN_1668022	689	14	16659	5.18111	1	0.836659	84.9122
SMART	SM00615:EPH_lbd	3	0.382653	0.129013	ILMN_1802646, ILMN_1663263, ILMN_1668022	410	14	9079	4.74512	1	0.616335	82.6536
INTERPRO	IPR001660:Sterile alpha motif SAM	6	0.765306	0.339293	ILMN_1718663, ILMN_1806320, ILMN_1799115, ILMN_1679460, ILMN_1802646, ILMN_1663263, ILMN_1705384, ILMN_1668022	689	93	16659	1.5599	1	0.983905	99.8662
SMART	SM00454:SAM	6	0.765306	0.409116	ILMN_1718663, ILMN_1806320, ILMN_1799115, ILMN_1679460, ILMN_1802646, ILMN_1663263, ILMN_1705384, ILMN_1668022	410	93	9079	1.42864	1	0.900595	99.8735
INTERPRO	IPR011510:Sterile alpha motif homology 2	3	0.382653	0.509468	ILMN_1718663, ILMN_1806320, ILMN_1679460, ILMN_1802646, ILMN_1705384	689	41	16659	1.76916	1	0.998046	99.9988
INTERPRO	IPR001245:Tyrosine protein kinase	6	0.765306	0.540856	ILMN_1686623, ILMN_1776708, ILMN_1802646, ILMN_1753135, ILMN_1663263, ILMN_1668022	689	118	16659	1.22942	1	0.998714	99.9996
GOTERM_MF_FAT	GO:0004713~protein tyrosine kinase activity	8	1.02041	0.572919	ILMN_1658835, ILMN_1686623, ILMN_1699574, ILMN_1695606, ILMN_1802646, ILMN_1753135, ILMN_1663263, ILMN_1668022	558	166	12983	1.1213	1	0.994235	99.9998
SMART	SM00219:TyrKc	6	0.765306	0.619425	ILMN_1686623, ILMN_1776708, ILMN_1802646, ILMN_1753135, ILMN_1663263, ILMN_1668022	410	118	9079	1.12596	1	0.973851	99.9995
UP_SEQ_FEATURE	domain:SAM	4	0.510204	0.645095	ILMN_1718663, ILMN_1802646, ILMN_1663263, ILMN_1668022	778	81	19113	1.21318	1	0.999997	100
INTERPRO	IPR008266:Tyrosine protein kinase, active site	4	0.510204	0.769779	ILMN_1686623, ILMN_1753135, ILMN_1663263, ILMN_1668022	689	97	16659	0.997052	1	0.999986	100
SP_PIR_KEYWORDS	tyrosine-protein kinase	4	0.510204	0.831173	ILMN_1686623, ILMN_1753135, ILMN_1663263, ILMN_1668022	778	111	19235	0.890942	1	0.994618	100
Annotation Cluster 120	Enrichment Score: 0.576789552269921
Category	Term	Count	%	PValue	Genes	List Total	Pop Hits	Pop Total	Fold Enrichment	Bonferroni	Benjamini	FDR
GOTERM_MF_FAT	GO:0008081~phosphoric diester hydrolase activity	9	1.14796	0.0273888	ILMN_1806533, ILMN_1681356, ILMN_1751689, ILMN_1805098, ILMN_1659197, ILMN_1666976, ILMN_1724066, ILMN_1710410, ILMN_1723969	558	84	12983	2.4929	1	0.463	34.7342
GOTERM_MF_FAT	GO:0004435~phosphoinositide phospholipase C activity	4	0.510204	0.0898569	ILMN_1751689, ILMN_1724066, ILMN_1710410, ILMN_1723969	558	25	12983	3.72272	1	0.754713	76.4649
GOTERM_MF_FAT	GO:0004629~phospholipase C activity	4	0.510204	0.14612	ILMN_1751689, ILMN_1724066, ILMN_1710410, ILMN_1723969	558	31	12983	3.0022	1	0.854718	91.1711
GOTERM_MF_FAT	GO:0004620~phospholipase activity	5	0.637755	0.479436	ILMN_1751689, ILMN_1666976, ILMN_1724066, ILMN_1710410, ILMN_1723969	558	83	12983	1.40163	1	0.988862	99.9956
GOTERM_MF_FAT	GO:0016298~lipase activity	5	0.637755	0.627083	ILMN_1751689, ILMN_1666976, ILMN_1724066, ILMN_1710410, ILMN_1723969	558	100	12983	1.16335	1	0.996852	100
SP_PIR_KEYWORDS	lipid degradation	3	0.382653	0.867352	ILMN_1666976, ILMN_1724066, ILMN_1723969	778	86	19235	0.862453	1	0.996596	100
GOTERM_BP_FAT	GO:0016042~lipid catabolic process	4	0.510204	0.978115	ILMN_1697433, ILMN_1666976, ILMN_1724066, ILMN_1723969	568	173	13528	0.55068	1	1	100
Annotation Cluster 121	Enrichment Score: 0.5686659665677446
Category	Term	Count	%	PValue	Genes	List Total	Pop Hits	Pop Total	Fold Enrichment	Bonferroni	Benjamini	FDR
UP_SEQ_FEATURE	domain:Ig-like 3	3	0.382653	0.179507	ILMN_1684447, ILMN_1728785, ILMN_1722809	778	19	19113	3.87897	1	0.989816	96.6794
UP_SEQ_FEATURE	domain:Ig-like 2	3	0.382653	0.331101	ILMN_1684447, ILMN_1728785, ILMN_1722809	778	29	19113	2.5414	1	0.998904	99.9013
UP_SEQ_FEATURE	domain:Ig-like 1	3	0.382653	0.331101	ILMN_1684447, ILMN_1728785, ILMN_1722809	778	29	19113	2.5414	1	0.998904	99.9013
Annotation Cluster 122	Enrichment Score: 0.5555834704702641
Category	Term	Count	%	PValue	Genes	List Total	Pop Hits	Pop Total	Fold Enrichment	Bonferroni	Benjamini	FDR
PUBMED_ID	17081065	5	0.637755	0.199192	ILMN_1762825, ILMN_1699692, ILMN_1804556, ILMN_1685078, ILMN_1801205	783	81	27491	2.16727	1	1	99.0742
PUBMED_ID	12643545	3	0.382653	0.209667	ILMN_1762825, ILMN_1699692, ILMN_1801205	783	30	27491	3.51098	1	1	99.2986
GOTERM_CC_FAT	GO:0042470~melanosome	6	0.765306	0.378819	ILMN_1762825, ILMN_1699692, ILMN_1804556, ILMN_1685078, ILMN_1801205, ILMN_1682929	581	89	12782	1.48315	1	0.835409	99.8554
GOTERM_CC_FAT	GO:0048770~pigment granule	6	0.765306	0.378819	ILMN_1762825, ILMN_1699692, ILMN_1804556, ILMN_1685078, ILMN_1801205, ILMN_1682929	581	89	12782	1.48315	1	0.835409	99.8554
Annotation Cluster 123	Enrichment Score: 0.5526795879146075
Category	Term	Count	%	PValue	Genes	List Total	Pop Hits	Pop Total	Fold Enrichment	Bonferroni	Benjamini	FDR
GOTERM_BP_FAT	GO:0006919~activation of caspase activity	5	0.637755	0.189679	ILMN_1703006, ILMN_1712943, ILMN_1712026, ILMN_1682738, ILMN_1680774	568	54	13528	2.20527	1	0.873755	97.5846
GOTERM_BP_FAT	GO:0001836~release of cytochrome c from mitochondria	3	0.382653	0.219215	ILMN_1712943, ILMN_1749662, ILMN_1682738	568	21	13528	3.40241	1	0.895878	98.7482
GOTERM_BP_FAT	GO:0010952~positive regulation of peptidase activity	5	0.637755	0.233909	ILMN_1703006, ILMN_1712943, ILMN_1712026, ILMN_1682738, ILMN_1680774	568	59	13528	2.01838	1	0.907923	99.1058
GOTERM_BP_FAT	GO:0043280~positive regulation of caspase activity	5	0.637755	0.233909	ILMN_1703006, ILMN_1712943, ILMN_1712026, ILMN_1682738, ILMN_1680774	568	59	13528	2.01838	1	0.907923	99.1058
GOTERM_BP_FAT	GO:0043281~regulation of caspase activity	6	0.765306	0.236289	ILMN_1703006, ILMN_1712943, ILMN_1749662, ILMN_1712026, ILMN_1682738, ILMN_1680774	568	79	13528	1.80888	1	0.908197	99.1537
GOTERM_BP_FAT	GO:0052548~regulation of endopeptidase activity	6	0.765306	0.26003	ILMN_1703006, ILMN_1712943, ILMN_1749662, ILMN_1712026, ILMN_1682738, ILMN_1680774	568	82	13528	1.7427	1	0.923519	99.5161
GOTERM_BP_FAT	GO:0052547~regulation of peptidase activity	6	0.765306	0.292484	ILMN_1703006, ILMN_1712943, ILMN_1749662, ILMN_1712026, ILMN_1682738, ILMN_1680774	568	86	13528	1.66164	1	0.940024	99.7813
GOTERM_BP_FAT	GO:0008637~apoptotic mitochondrial changes	3	0.382653	0.375288	ILMN_1712943, ILMN_1749662, ILMN_1682738	568	31	13528	2.30486	1	0.965899	99.9758
GOTERM_BP_FAT	GO:0007005~mitochondrion organization	6	0.765306	0.691779	ILMN_1658835, ILMN_1712943, ILMN_1749662, ILMN_1682738, ILMN_1721128, ILMN_1796925	568	138	13528	1.03552	1	0.9973	100
Annotation Cluster 124	Enrichment Score: 0.5497065279471596
Category	Term	Count	%	PValue	Genes	List Total	Pop Hits	Pop Total	Fold Enrichment	Bonferroni	Benjamini	FDR
GOTERM_CC_FAT	GO:0005856~cytoskeleton	79	10.0765	0.0236691	ILMN_1791726, ILMN_1674580, ILMN_1798892, ILMN_1795937, ILMN_1772366, ILMN_1808707, ILMN_1745593, ILMN_1659086, ILMN_1712075, ILMN_1698307, ILMN_1677746, ILMN_1701700, ILMN_1671843, ILMN_1734742, ILMN_1664071, ILMN_1779147, ILMN_1810782, ILMN_1715203, ILMN_1713139, ILMN_1668411, ILMN_1812254, ILMN_1681777, ILMN_1765876, ILMN_1761322, ILMN_1775441, ILMN_1758825, ILMN_1730229, ILMN_1678143, ILMN_17…	581	1381	12782	1.25851	0.99982	0.213008	28.0344
GOTERM_CC_FAT	GO:0044430~cytoskeletal part	47	5.9949	0.341666	ILMN_1791726, ILMN_1768486, ILMN_1792409, ILMN_1660775, ILMN_1795937, ILMN_1794863, ILMN_1772366, ILMN_1703558, ILMN_1799115, ILMN_1745593, ILMN_1730845, ILMN_1659086, ILMN_1712075, ILMN_1677746, ILMN_1752075, ILMN_1671843, ILMN_1664071, ILMN_1810559, ILMN_1666625, ILMN_1715203, ILMN_1713139, ILMN_1677261, ILMN_1671486, ILMN_1812254, ILMN_1681777, ILMN_1774132, ILMN_1669714, ILMN_1730229, ILMN_17…	581	952	12782	1.08613	1	0.815657	99.679
GOTERM_CC_FAT	GO:0043232~intracellular non-membrane-bounded organelle	108	13.7755	0.884494	ILMN_1791726, ILMN_1691747, ILMN_1808707, ILMN_1745593, ILMN_1785202, ILMN_1659086, ILMN_1712075, ILMN_1677746, ILMN_1713139, ILMN_1668411, ILMN_1771179, ILMN_1765876, ILMN_1683450, ILMN_1758825, ILMN_1730229, ILMN_1661347, ILMN_1796682, ILMN_1678143, ILMN_1789596, ILMN_1722726, ILMN_1796901, ILMN_1676422, ILMN_1812392, ILMN_1671686, ILMN_1805448, ILMN_1724350, ILMN_1769926, ILMN_1678353, ILMN_17…	581	2596	12782	0.915254	1	0.994754	100
GOTERM_CC_FAT	GO:0043228~non-membrane-bounded organelle	108	13.7755	0.884494	ILMN_1791726, ILMN_1691747, ILMN_1808707, ILMN_1745593, ILMN_1785202, ILMN_1659086, ILMN_1712075, ILMN_1677746, ILMN_1713139, ILMN_1668411, ILMN_1771179, ILMN_1765876, ILMN_1683450, ILMN_1758825, ILMN_1730229, ILMN_1661347, ILMN_1796682, ILMN_1678143, ILMN_1789596, ILMN_1722726, ILMN_1796901, ILMN_1676422, ILMN_1812392, ILMN_1671686, ILMN_1805448, ILMN_1724350, ILMN_1769926, ILMN_1678353, ILMN_17…	581	2596	12782	0.915254	1	0.994754	100
Annotation Cluster 125	Enrichment Score: 0.5484163111016398
Category	Term	Count	%	PValue	Genes	List Total	Pop Hits	Pop Total	Fold Enrichment	Bonferroni	Benjamini	FDR
PUBMED_ID	17344846	24	3.06122	0.00549822	ILMN_1804339, ILMN_1666924, ILMN_1686623, ILMN_1672302, ILMN_1707798, ILMN_1753135, ILMN_1791280, ILMN_1758939, ILMN_1671281, ILMN_1652072, ILMN_1667381, ILMN_1802646, ILMN_1663263, ILMN_1754375, ILMN_1708340, ILMN_1806908, ILMN_1776708, ILMN_1771800, ILMN_1788149, ILMN_1798029, ILMN_1772814, ILMN_1697189, ILMN_1716563, ILMN_1733421, ILMN_1668022	783	451	27491	1.86837	1	0.838856	10.9716
UP_SEQ_FEATURE	domain:Protein kinase	27	3.44388	0.0681773	ILMN_1804339, ILMN_1666924, ILMN_1686623, ILMN_1672302, ILMN_1707798, ILMN_1753135, ILMN_1734445, ILMN_1758939, ILMN_1671281, ILMN_1666445, ILMN_1652072, ILMN_1667381, ILMN_1802646, ILMN_1663263, ILMN_1809695, ILMN_1754375, ILMN_1708340, ILMN_1806908, ILMN_1776708, ILMN_1771800, ILMN_1788149, ILMN_1798029, ILMN_1772814, ILMN_1748281, ILMN_1697189, ILMN_1733421, ILMN_1716563, ILMN_1668022	778	469	19113	1.4143	1	0.888214	70.3367
INTERPRO	IPR002290:Serine/threonine protein kinase	17	2.16837	0.071314	ILMN_1754375, ILMN_1804339, ILMN_1708340, ILMN_1672302, ILMN_1806908, ILMN_1707798, ILMN_1771800, ILMN_1788149, ILMN_1772814, ILMN_1798029, ILMN_1666445, ILMN_1748281, ILMN_1652072, ILMN_1667381, ILMN_1697189, ILMN_1733421, ILMN_1716563, ILMN_1809695	689	259	16659	1.58701	1	0.737924	69.3097
GOTERM_MF_FAT	GO:0004672~protein kinase activity	34	4.33673	0.0939368	ILMN_1804339, ILMN_1658835, ILMN_1666924, ILMN_1686623, ILMN_1672302, ILMN_1707798, ILMN_1753135, ILMN_1752247, ILMN_1791280, ILMN_1758939, ILMN_1671281, ILMN_1666445, ILMN_1652072, ILMN_1667381, ILMN_1802646, ILMN_1663263, ILMN_1809695, ILMN_1754375, ILMN_1704063, ILMN_1709101, ILMN_1708340, ILMN_1806908, ILMN_1776708, ILMN_1771800, ILMN_1788149, ILMN_1772814, ILMN_1798029, ILMN_1748281, ILMN_16…	558	606	12983	1.30541	1	0.75214	78.0348
SMART	SM00220:S_TKc	17	2.16837	0.121932	ILMN_1754375, ILMN_1804339, ILMN_1708340, ILMN_1672302, ILMN_1806908, ILMN_1707798, ILMN_1771800, ILMN_1788149, ILMN_1772814, ILMN_1798029, ILMN_1666445, ILMN_1748281, ILMN_1652072, ILMN_1667381, ILMN_1697189, ILMN_1733421, ILMN_1716563, ILMN_1809695	410	259	9079	1.45346	1	0.606191	80.7776
INTERPRO	IPR000719:Protein kinase, core	26	3.31633	0.130787	ILMN_1804339, ILMN_1666924, ILMN_1686623, ILMN_1672302, ILMN_1707798, ILMN_1753135, ILMN_1758939, ILMN_1671281, ILMN_1666445, ILMN_1652072, ILMN_1667381, ILMN_1802646, ILMN_1663263, ILMN_1809695, ILMN_1754375, ILMN_1708340, ILMN_1806908, ILMN_1776708, ILMN_1771800, ILMN_1788149, ILMN_1798029, ILMN_1772814, ILMN_1748281, ILMN_1697189, ILMN_1733421, ILMN_1716563, ILMN_1668022	689	476	16659	1.32068	1	0.868614	89.3315
SP_PIR_KEYWORDS	kinase	35	4.46429	0.131943	ILMN_1668675, ILMN_1804339, ILMN_1666924, ILMN_1732636, ILMN_1686623, ILMN_1672302, ILMN_1707798, ILMN_1753135, ILMN_1752247, ILMN_1758398, ILMN_1800130, ILMN_1758939, ILMN_1810782, ILMN_1666445, ILMN_1652072, ILMN_1690676, ILMN_1745817, ILMN_1682757, ILMN_1663263, ILMN_1698445, ILMN_1717803, ILMN_1809695, ILMN_1754375, ILMN_1808501, ILMN_1708340, ILMN_1709101, ILMN_1806908, ILMN_1776708, ILMN_17…	778	688	19235	1.25774	1	0.632565	86.7088
GOTERM_MF_FAT	GO:0004674~protein serine/threonine kinase activity	24	3.06122	0.16066	ILMN_1804339, ILMN_1666924, ILMN_1672302, ILMN_1707798, ILMN_1752247, ILMN_1791280, ILMN_1758939, ILMN_1666445, ILMN_1652072, ILMN_1667381, ILMN_1809695, ILMN_1754375, ILMN_1708340, ILMN_1709101, ILMN_1806908, ILMN_1776708, ILMN_1771800, ILMN_1788149, ILMN_1798029, ILMN_1772814, ILMN_1748281, ILMN_1665219, ILMN_1776516, ILMN_1697189, ILMN_1716563, ILMN_1733421	558	430	12983	1.29862	1	0.874558	93.2189
INTERPRO	IPR017442:Serine/threonine protein kinase-related	20	2.55102	0.161437	ILMN_1754375, ILMN_1804339, ILMN_1666924, ILMN_1708340, ILMN_1672302, ILMN_1806908, ILMN_1776708, ILMN_1707798, ILMN_1771800, ILMN_1758939, ILMN_1788149, ILMN_1772814, ILMN_1798029, ILMN_1666445, ILMN_1748281, ILMN_1652072, ILMN_1667381, ILMN_1697189, ILMN_1733421, ILMN_1716563, ILMN_1809695	689	359	16659	1.34699	1	0.902879	93.9857
INTERPRO	IPR017441:Protein kinase, ATP binding site	24	3.06122	0.18997	ILMN_1804339, ILMN_1666924, ILMN_1686623, ILMN_1672302, ILMN_1707798, ILMN_1753135, ILMN_1758939, ILMN_1666445, ILMN_1671281, ILMN_1652072, ILMN_1663263, ILMN_1809695, ILMN_1754375, ILMN_1708340, ILMN_1806908, ILMN_1776708, ILMN_1771800, ILMN_1788149, ILMN_1798029, ILMN_1772814, ILMN_1748281, ILMN_1697189, ILMN_1716563, ILMN_1733421, ILMN_1668022	689	455	16659	1.27535	1	0.927915	96.5394
INTERPRO	IPR008271:Serine/threonine protein kinase, active site	19	2.42347	0.214958	ILMN_1754375, ILMN_1804339, ILMN_1666924, ILMN_1708340, ILMN_1672302, ILMN_1806908, ILMN_1776708, ILMN_1707798, ILMN_1771800, ILMN_1758939, ILMN_1788149, ILMN_1772814, ILMN_1798029, ILMN_1666445, ILMN_1748281, ILMN_1652072, ILMN_1697189, ILMN_1733421, ILMN_1716563, ILMN_1809695	689	354	16659	1.29772	1	0.938951	97.9016
SP_PIR_KEYWORDS	nucleotide-binding	74	9.43878	0.274316	ILMN_1791726, ILMN_1746027, ILMN_1804339, ILMN_1677404, ILMN_1676609, ILMN_1686623, ILMN_1681356, ILMN_1758398, ILMN_1800130, ILMN_1758939, ILMN_1715203, ILMN_1690676, ILMN_1712888, ILMN_1812254, ILMN_1708588, ILMN_1685820, ILMN_1663263, ILMN_1662358, ILMN_1809695, ILMN_1808590, ILMN_1733045, ILMN_1654598, ILMN_1688877, ILMN_1776708, ILMN_1771800, ILMN_1798029, ILMN_1656593, ILMN_1734857, ILMN_17…	778	1686	19235	1.08514	1	0.817605	98.9673
SP_PIR_KEYWORDS	serine/threonine-protein kinase	19	2.42347	0.280277	ILMN_1754375, ILMN_1804339, ILMN_1666924, ILMN_1708340, ILMN_1672302, ILMN_1806908, ILMN_1776708, ILMN_1707798, ILMN_1771800, ILMN_1758939, ILMN_1788149, ILMN_1772814, ILMN_1798029, ILMN_1666445, ILMN_1748281, ILMN_1652072, ILMN_1697189, ILMN_1733421, ILMN_1716563, ILMN_1809695	778	381	19235	1.23294	1	0.818512	99.0819
UP_SEQ_FEATURE	active site:Proton acceptor	31	3.95408	0.292205	ILMN_1804339, ILMN_1666924, ILMN_1686623, ILMN_1672302, ILMN_1708275, ILMN_1707798, ILMN_1726769, ILMN_1753135, ILMN_1675515, ILMN_1758939, ILMN_1761093, ILMN_1666445, ILMN_1652072, ILMN_1719498, ILMN_1809695, ILMN_1754375, ILMN_1708340, ILMN_1806908, ILMN_1708987, ILMN_1736042, ILMN_1692163, ILMN_1673991, ILMN_1771800, ILMN_1788149, ILMN_1772814, ILMN_1798029, ILMN_1748281, ILMN_1697189, ILMN_17…	778	658	19113	1.1574	1	0.998019	99.7389
GOTERM_BP_FAT	GO:0006468~protein amino acid phosphorylation	32	4.08163	0.293459	ILMN_1743455, ILMN_1804339, ILMN_1658835, ILMN_1666924, ILMN_1686623, ILMN_1672302, ILMN_1785202, ILMN_1707798, ILMN_1753135, ILMN_1698307, ILMN_1758939, ILMN_1671281, ILMN_1666445, ILMN_1652072, ILMN_1667381, ILMN_1802646, ILMN_1663263, ILMN_1809695, ILMN_1754375, ILMN_1708340, ILMN_1711617, ILMN_1806908, ILMN_1776708, ILMN_1673521, ILMN_1771800, ILMN_1788149, ILMN_1772814, ILMN_1798029, ILMN_17…	568	667	13528	1.14264	1	0.939633	99.7865
GOTERM_BP_FAT	GO:0006793~phosphorus metabolic process	44	5.61224	0.381016	ILMN_1720113, ILMN_1743455, ILMN_1658835, ILMN_1803509, ILMN_1804339, ILMN_1666924, ILMN_1686623, ILMN_1785202, ILMN_1672302, ILMN_1707798, ILMN_1753135, ILMN_1698307, ILMN_1657810, ILMN_1724367, ILMN_1758939, ILMN_1671281, ILMN_1666445, ILMN_1652072, ILMN_1652017, ILMN_1667381, ILMN_1802646, ILMN_1663263, ILMN_1809695, ILMN_1754375, ILMN_1708340, ILMN_1711617, ILMN_1806908, ILMN_1776708, ILMN_17…	568	973	13528	1.07702	1	0.967157	99.9795
GOTERM_BP_FAT	GO:0006796~phosphate metabolic process	44	5.61224	0.381016	ILMN_1720113, ILMN_1743455, ILMN_1658835, ILMN_1803509, ILMN_1804339, ILMN_1666924, ILMN_1686623, ILMN_1785202, ILMN_1672302, ILMN_1707798, ILMN_1753135, ILMN_1698307, ILMN_1657810, ILMN_1724367, ILMN_1758939, ILMN_1671281, ILMN_1666445, ILMN_1652072, ILMN_1652017, ILMN_1667381, ILMN_1802646, ILMN_1663263, ILMN_1809695, ILMN_1754375, ILMN_1708340, ILMN_1711617, ILMN_1806908, ILMN_1776708, ILMN_17…	568	973	13528	1.07702	1	0.967157	99.9795
GOTERM_BP_FAT	GO:0016310~phosphorylation	36	4.59184	0.415515	ILMN_1743455, ILMN_1804339, ILMN_1803509, ILMN_1658835, ILMN_1666924, ILMN_1686623, ILMN_1672302, ILMN_1785202, ILMN_1707798, ILMN_1753135, ILMN_1698307, ILMN_1724367, ILMN_1758939, ILMN_1671281, ILMN_1666445, ILMN_1652072, ILMN_1667381, ILMN_1802646, ILMN_1663263, ILMN_1809695, ILMN_1754375, ILMN_1708340, ILMN_1711617, ILMN_1806908, ILMN_1776708, ILMN_1763387, ILMN_1673521, ILMN_1771800, ILMN_17…	568	800	13528	1.07176	1	0.974084	99.9926
SP_PIR_KEYWORDS	transferase	59	7.52551	0.428248	ILMN_1804339, ILMN_1686623, ILMN_1773959, ILMN_1722218, ILMN_1660063, ILMN_1766169, ILMN_1758398, ILMN_1800130, ILMN_1758939, ILMN_1690676, ILMN_1725241, ILMN_1762167, ILMN_1663263, ILMN_1809695, ILMN_1677719, ILMN_1802654, ILMN_1796682, ILMN_1712475, ILMN_1756937, ILMN_1776708, ILMN_1673991, ILMN_1704904, ILMN_1771800, ILMN_1654606, ILMN_1798029, ILMN_1656593, ILMN_1733421, ILMN_1716563, ILMN_17…	778	1394	19235	1.04641	1	0.91482	99.9655
UP_SEQ_FEATURE	binding site:ATP	24	3.06122	0.441467	ILMN_1804339, ILMN_1666924, ILMN_1676609, ILMN_1686623, ILMN_1672302, ILMN_1707798, ILMN_1753135, ILMN_1758939, ILMN_1666445, ILMN_1652072, ILMN_1809695, ILMN_1754375, ILMN_1708340, ILMN_1806908, ILMN_1776708, ILMN_1771800, ILMN_1788149, ILMN_1798029, ILMN_1772814, ILMN_1748281, ILMN_1776516, ILMN_1697189, ILMN_1716563, ILMN_1733421, ILMN_1668022	778	542	19113	1.08783	1	0.999799	99.9956
GOTERM_MF_FAT	GO:0032555~purine ribonucleotide binding	80	10.2041	0.518573	ILMN_1791726, ILMN_1746027, ILMN_1804339, ILMN_1677404, ILMN_1676609, ILMN_1686623, ILMN_1758398, ILMN_1800130, ILMN_1758939, ILMN_1715203, ILMN_1690676, ILMN_1712888, ILMN_1812254, ILMN_1708588, ILMN_1685820, ILMN_1663263, ILMN_1662358, ILMN_1809695, ILMN_1808590, ILMN_1733045, ILMN_1654598, ILMN_1688877, ILMN_1776708, ILMN_1771800, ILMN_1798029, ILMN_1656593, ILMN_1734857, ILMN_1752299, ILMN_17…	558	1836	12983	1.01381	1	0.991027	99.9987
GOTERM_MF_FAT	GO:0032553~ribonucleotide binding	80	10.2041	0.518573	ILMN_1791726, ILMN_1746027, ILMN_1804339, ILMN_1677404, ILMN_1676609, ILMN_1686623, ILMN_1758398, ILMN_1800130, ILMN_1758939, ILMN_1715203, ILMN_1690676, ILMN_1712888, ILMN_1812254, ILMN_1708588, ILMN_1685820, ILMN_1663263, ILMN_1662358, ILMN_1809695, ILMN_1808590, ILMN_1733045, ILMN_1654598, ILMN_1688877, ILMN_1776708, ILMN_1771800, ILMN_1798029, ILMN_1656593, ILMN_1734857, ILMN_1752299, ILMN_17…	558	1836	12983	1.01381	1	0.991027	99.9987
GOTERM_MF_FAT	GO:0017076~purine nucleotide binding	83	10.5867	0.533061	ILMN_1791726, ILMN_1746027, ILMN_1804339, ILMN_1677404, ILMN_1676609, ILMN_1686623, ILMN_1758398, ILMN_1800130, ILMN_1758939, ILMN_1715203, ILMN_1690676, ILMN_1712888, ILMN_1812254, ILMN_1708588, ILMN_1685820, ILMN_1663263, ILMN_1662358, ILMN_1809695, ILMN_1808590, ILMN_1733045, ILMN_1654598, ILMN_1688877, ILMN_1776708, ILMN_1771800, ILMN_1798029, ILMN_1656593, ILMN_1734857, ILMN_1752299, ILMN_17…	558	1918	12983	1.00686	1	0.992039	99.9992
UP_SEQ_FEATURE	nucleotide phosphate-binding region:ATP	39	4.97449	0.597846	ILMN_1668675, ILMN_1804339, ILMN_1666924, ILMN_1676609, ILMN_1686623, ILMN_1672302, ILMN_1707798, ILMN_1753135, ILMN_1796589, ILMN_1758398, ILMN_1758939, ILMN_1666625, ILMN_1666445, ILMN_1715203, ILMN_1652072, ILMN_1690676, ILMN_1812254, ILMN_1802646, ILMN_1682757, ILMN_1750412, ILMN_1809695, ILMN_1669714, ILMN_1754375, ILMN_1708340, ILMN_1654598, ILMN_1806908, ILMN_1776708, ILMN_1771800, ILMN_17…	778	962	19113	0.995953	1	0.99999	100
SP_PIR_KEYWORDS	atp-binding	51	6.5051	0.71729	ILMN_1804339, ILMN_1676609, ILMN_1686623, ILMN_1758398, ILMN_1758939, ILMN_1800130, ILMN_1715203, ILMN_1690676, ILMN_1812254, ILMN_1712888, ILMN_1708588, ILMN_1663263, ILMN_1809695, ILMN_1654598, ILMN_1776708, ILMN_1771800, ILMN_1798029, ILMN_1656593, ILMN_1712026, ILMN_1716563, ILMN_1733421, ILMN_1680774, ILMN_1668022, ILMN_1668675, ILMN_1666924, ILMN_1732636, ILMN_1672302, ILMN_1707798, ILMN_18…	778	1326	19235	0.95091	1	0.984766	100
GOTERM_MF_FAT	GO:0000166~nucleotide binding	90	11.4796	0.81404	ILMN_1791726, ILMN_1746027, ILMN_1804339, ILMN_1677404, ILMN_1676609, ILMN_1686623, ILMN_1758398, ILMN_1800130, ILMN_1758939, ILMN_1715203, ILMN_1690676, ILMN_1712888, ILMN_1745817, ILMN_1812254, ILMN_1708588, ILMN_1685820, ILMN_1663263, ILMN_1662358, ILMN_1809695, ILMN_1808590, ILMN_1733045, ILMN_1654598, ILMN_1713471, ILMN_1688877, ILMN_1776708, ILMN_1771800, ILMN_1751753, ILMN_1798029, ILMN_16…	558	2245	12983	0.932754	1	0.999768	100
GOTERM_MF_FAT	GO:0032559~adenyl ribonucleotide binding	58	7.39796	0.853033	ILMN_1804339, ILMN_1676609, ILMN_1686623, ILMN_1758398, ILMN_1758939, ILMN_1800130, ILMN_1715203, ILMN_1690676, ILMN_1712888, ILMN_1812254, ILMN_1708588, ILMN_1663263, ILMN_1809695, ILMN_1654598, ILMN_1776708, ILMN_1771800, ILMN_1798029, ILMN_1656593, ILMN_1712026, ILMN_1733421, ILMN_1716563, ILMN_1680774, ILMN_1668022, ILMN_1668675, ILMN_1666924, ILMN_1732636, ILMN_1672302, ILMN_1707798, ILMN_18…	558	1497	12983	0.901461	1	0.999899	100
GOTERM_MF_FAT	GO:0005524~ATP binding	57	7.27041	0.859037	ILMN_1804339, ILMN_1676609, ILMN_1686623, ILMN_1758398, ILMN_1758939, ILMN_1800130, ILMN_1715203, ILMN_1690676, ILMN_1812254, ILMN_1712888, ILMN_1708588, ILMN_1663263, ILMN_1809695, ILMN_1654598, ILMN_1776708, ILMN_1771800, ILMN_1798029, ILMN_1656593, ILMN_1712026, ILMN_1716563, ILMN_1733421, ILMN_1680774, ILMN_1668022, ILMN_1668675, ILMN_1666924, ILMN_1732636, ILMN_1672302, ILMN_1707798, ILMN_18…	558	1477	12983	0.897915	1	0.999913	100
GOTERM_MF_FAT	GO:0001883~purine nucleoside binding	62	7.90816	0.860225	ILMN_1804339, ILMN_1676609, ILMN_1686623, ILMN_1758398, ILMN_1758939, ILMN_1800130, ILMN_1715203, ILMN_1690676, ILMN_1712888, ILMN_1812254, ILMN_1708588, ILMN_1663263, ILMN_1809695, ILMN_1654598, ILMN_1776708, ILMN_1771800, ILMN_1798029, ILMN_1656593, ILMN_1712026, ILMN_1733421, ILMN_1716563, ILMN_1680774, ILMN_1668022, ILMN_1668675, ILMN_1666924, ILMN_1732636, ILMN_1672302, ILMN_1707798, ILMN_18…	558	1601	12983	0.901034	1	0.999911	100
GOTERM_MF_FAT	GO:0030554~adenyl nucleotide binding	61	7.78061	0.860946	ILMN_1804339, ILMN_1676609, ILMN_1686623, ILMN_1758398, ILMN_1758939, ILMN_1800130, ILMN_1715203, ILMN_1690676, ILMN_1712888, ILMN_1812254, ILMN_1708588, ILMN_1663263, ILMN_1809695, ILMN_1654598, ILMN_1776708, ILMN_1771800, ILMN_1798029, ILMN_1656593, ILMN_1712026, ILMN_1733421, ILMN_1716563, ILMN_1680774, ILMN_1668022, ILMN_1668675, ILMN_1666924, ILMN_1732636, ILMN_1672302, ILMN_1707798, ILMN_18…	558	1577	12983	0.899993	1	0.999908	100
GOTERM_MF_FAT	GO:0001882~nucleoside binding	62	7.90816	0.873322	ILMN_1804339, ILMN_1676609, ILMN_1686623, ILMN_1758398, ILMN_1758939, ILMN_1800130, ILMN_1715203, ILMN_1690676, ILMN_1712888, ILMN_1812254, ILMN_1708588, ILMN_1663263, ILMN_1809695, ILMN_1654598, ILMN_1776708, ILMN_1771800, ILMN_1798029, ILMN_1656593, ILMN_1712026, ILMN_1733421, ILMN_1716563, ILMN_1680774, ILMN_1668022, ILMN_1668675, ILMN_1666924, ILMN_1732636, ILMN_1672302, ILMN_1707798, ILMN_18…	558	1612	12983	0.894886	1	0.999934	100
Annotation Cluster 126	Enrichment Score: 0.5479626410529368
Category	Term	Count	%	PValue	Genes	List Total	Pop Hits	Pop Total	Fold Enrichment	Bonferroni	Benjamini	FDR
GOTERM_MF_FAT	GO:0043167~ion binding	203	25.8929	0.0362975	ILMN_1743933, ILMN_1692156, ILMN_1682929, ILMN_1764231, ILMN_1677746, ILMN_1728650, ILMN_1721605, ILMN_1668411, ILMN_1771179, ILMN_1707571, ILMN_1736518, ILMN_1758825, ILMN_1800332, ILMN_1688500, ILMN_1653894, ILMN_1694432, ILMN_1754076, ILMN_1710859, ILMN_1672611, ILMN_1654606, ILMN_1683146, ILMN_1724350, ILMN_1683148, ILMN_1806667, ILMN_1747979, ILMN_1787265, ILMN_1802082, ILMN_1805132, ILMN_17…	558	4241	12983	1.1137	1	0.534248	43.3393
GOTERM_MF_FAT	GO:0043169~cation binding	200	25.5102	0.0382931	ILMN_1743933, ILMN_1692156, ILMN_1682929, ILMN_1764231, ILMN_1677746, ILMN_1728650, ILMN_1721605, ILMN_1668411, ILMN_1771179, ILMN_1736518, ILMN_1758825, ILMN_1800332, ILMN_1688500, ILMN_1653894, ILMN_1694432, ILMN_1754076, ILMN_1710859, ILMN_1672611, ILMN_1654606, ILMN_1683146, ILMN_1724350, ILMN_1683148, ILMN_1806667, ILMN_1747979, ILMN_1787265, ILMN_1802082, ILMN_1805132, ILMN_1740407, ILMN_17…	558	4179	12983	1.11352	1	0.535865	45.1155
GOTERM_MF_FAT	GO:0046872~metal ion binding	198	25.2551	0.0404819	ILMN_1743933, ILMN_1692156, ILMN_1682929, ILMN_1764231, ILMN_1677746, ILMN_1728650, ILMN_1721605, ILMN_1668411, ILMN_1771179, ILMN_1736518, ILMN_1758825, ILMN_1800332, ILMN_1688500, ILMN_1653894, ILMN_1694432, ILMN_1754076, ILMN_1710859, ILMN_1672611, ILMN_1654606, ILMN_1683146, ILMN_1724350, ILMN_1683148, ILMN_1806667, ILMN_1747979, ILMN_1787265, ILMN_1802082, ILMN_1805132, ILMN_1740407, ILMN_17…	558	4140	12983	1.11277	1	0.53092	47.0038
SP_PIR_KEYWORDS	metal-binding	115	14.6684	0.74475	ILMN_1665761, ILMN_1743933, ILMN_1779401, ILMN_1764231, ILMN_1677746, ILMN_1788131, ILMN_1657810, ILMN_1690963, ILMN_1681356, ILMN_1728650, ILMN_1721605, ILMN_1668411, ILMN_1663112, ILMN_1771179, ILMN_1708588, ILMN_1763834, ILMN_1758825, ILMN_1793517, ILMN_1800332, ILMN_1659197, ILMN_1676526, ILMN_1653894, ILMN_1694432, ILMN_1754076, ILMN_1771800, ILMN_1654606, ILMN_1683146, ILMN_1724350, ILMN_16…	778	2972	19235	0.956669	1	0.98732	100
GOTERM_MF_FAT	GO:0046914~transition metal ion binding	100	12.7551	0.987886	ILMN_1665761, ILMN_1743933, ILMN_1682929, ILMN_1764231, ILMN_1788131, ILMN_1657810, ILMN_1690963, ILMN_1728650, ILMN_1721605, ILMN_1668411, ILMN_1663112, ILMN_1771179, ILMN_1763834, ILMN_1758825, ILMN_1793517, ILMN_1800332, ILMN_1665775, ILMN_1713471, ILMN_1659197, ILMN_1805807, ILMN_1653894, ILMN_1694432, ILMN_1771800, ILMN_1654606, ILMN_1683146, ILMN_1724350, ILMN_1683148, ILMN_1787265, ILMN_17…	558	2785	12983	0.835441	1	1	100
SP_PIR_KEYWORDS	zinc	65	8.29082	0.998601	ILMN_1762021, ILMN_1665761, ILMN_1701603, ILMN_1674580, ILMN_1743933, ILMN_1760503, ILMN_1764231, ILMN_1656826, ILMN_1752247, ILMN_1795388, ILMN_1690963, ILMN_1728650, ILMN_1721605, ILMN_1668411, ILMN_1703142, ILMN_1663112, ILMN_1715401, ILMN_1763834, ILMN_1758825, ILMN_1783805, ILMN_1793517, ILMN_1776708, ILMN_1805807, ILMN_1653894, ILMN_1694432, ILMN_1656129, ILMN_1771800, ILMN_1654606, ILMN_16…	778	2189	19235	0.734142	1	1	100
GOTERM_MF_FAT	GO:0008270~zinc ion binding	70	8.92857	0.99985	ILMN_1762021, ILMN_1665761, ILMN_1701603, ILMN_1743933, ILMN_1674580, ILMN_1760503, ILMN_1682929, ILMN_1726769, ILMN_1764231, ILMN_1656826, ILMN_1752247, ILMN_1795388, ILMN_1690963, ILMN_1728650, ILMN_1721605, ILMN_1668411, ILMN_1703142, ILMN_1663112, ILMN_1715401, ILMN_1763834, ILMN_1758825, ILMN_1783805, ILMN_1793517, ILMN_1776708, ILMN_1805807, ILMN_1653894, ILMN_1658094, ILMN_1694432, ILMN_16…	558	2311	12983	0.704756	1	1	100
SP_PIR_KEYWORDS	zinc-finger	40	5.10204	0.99999	ILMN_1762021, ILMN_1665761, ILMN_1674580, ILMN_1768486, ILMN_1743933, ILMN_1732636, ILMN_1802082, ILMN_1789991, ILMN_1703558, ILMN_1760503, ILMN_1750706, ILMN_1706266, ILMN_1656826, ILMN_1752247, ILMN_1795388, ILMN_1655611, ILMN_1690963, ILMN_1728650, ILMN_1671281, ILMN_1669355, ILMN_1721605, ILMN_1668411, ILMN_1703142, ILMN_1678493, ILMN_1659800, ILMN_1783805, ILMN_1685441, ILMN_1793517, ILMN_17…	778	1718	19235	0.575638	1	1	100
Annotation Cluster 127	Enrichment Score: 0.545763969568615
Category	Term	Count	%	PValue	Genes	List Total	Pop Hits	Pop Total	Fold Enrichment	Bonferroni	Benjamini	FDR
INTERPRO	IPR002049:EGF-like, laminin	4	0.510204	0.239113	ILMN_1699692, ILMN_1786966, ILMN_1711208, ILMN_1770454	689	41	16659	2.35888	1	0.951601	98.726
SMART	SM00180:EGF_Lam	4	0.510204	0.280862	ILMN_1699692, ILMN_1786966, ILMN_1711208, ILMN_1770454	410	41	9079	2.16038	1	0.815067	98.4723
SP_PIR_KEYWORDS	laminin egf-like domain	3	0.382653	0.34325	ILMN_1786966, ILMN_1711208, ILMN_1770454	778	30	19235	2.47237	1	0.862392	99.7513
Annotation Cluster 128	Enrichment Score: 0.5443306859409995
Category	Term	Count	%	PValue	Genes	List Total	Pop Hits	Pop Total	Fold Enrichment	Bonferroni	Benjamini	FDR
UP_SEQ_FEATURE	domain:CTCK	3	0.382653	0.270314	ILMN_1678816, ILMN_1676449, ILMN_1756959	778	25	19113	2.94802	1	0.997513	99.5589
INTERPRO	IPR006207:Cystine knot, C-terminal	3	0.382653	0.276385	ILMN_1678816, ILMN_1676449, ILMN_1756959	689	25	16659	2.90142	1	0.968072	99.4286
SMART	SM00041:CT	3	0.382653	0.31162	ILMN_1678816, ILMN_1676449, ILMN_1756959	410	25	9079	2.65727	1	0.845424	99.1224
Annotation Cluster 129	Enrichment Score: 0.5426390596153813
Category	Term	Count	%	PValue	Genes	List Total	Pop Hits	Pop Total	Fold Enrichment	Bonferroni	Benjamini	FDR
GOTERM_MF_FAT	GO:0005313~L-glutamate transmembrane transporter activity	3	0.382653	0.0782036	ILMN_1767842, ILMN_1666904, ILMN_1785380	558	11	12983	6.34555	1	0.723882	71.3837
GOTERM_MF_FAT	GO:0015172~acidic amino acid transmembrane transporter activity	3	0.382653	0.0912584	ILMN_1767842, ILMN_1666904, ILMN_1785380	558	12	12983	5.81676	1	0.753984	77.0157
GOTERM_MF_FAT	GO:0015293~symporter activity	9	1.14796	0.235131	ILMN_1675391, ILMN_1778321, ILMN_1815581, ILMN_1797600, ILMN_1673637, ILMN_1742731, ILMN_1767842, ILMN_1666904, ILMN_1785380	558	137	12983	1.52849	1	0.921271	98.3733
SP_PIR_KEYWORDS	Symport	7	0.892857	0.292174	ILMN_1675391, ILMN_1815581, ILMN_1797600, ILMN_1673637, ILMN_1767842, ILMN_1666904, ILMN_1785380	778	111	19235	1.55915	1	0.823638	99.2762
SP_PIR_KEYWORDS	Sodium	6	0.765306	0.505759	ILMN_1675391, ILMN_1712023, ILMN_1700328, ILMN_1673637, ILMN_1767842, ILMN_1666904	778	116	19235	1.27881	1	0.938522	99.9957
SP_PIR_KEYWORDS	Sodium transport	6	0.765306	0.505759	ILMN_1675391, ILMN_1712023, ILMN_1700328, ILMN_1673637, ILMN_1767842, ILMN_1666904	778	116	19235	1.27881	1	0.938522	99.9957
GOTERM_MF_FAT	GO:0031402~sodium ion binding	6	0.765306	0.567639	ILMN_1675391, ILMN_1712023, ILMN_1700328, ILMN_1673637, ILMN_1767842, ILMN_1666904	558	117	12983	1.19318	1	0.994023	99.9997
GOTERM_BP_FAT	GO:0006814~sodium ion transport	6	0.765306	0.640436	ILMN_1675391, ILMN_1712023, ILMN_1700328, ILMN_1673637, ILMN_1767842, ILMN_1666904	568	130	13528	1.09924	1	0.995549	100
Annotation Cluster 130	Enrichment Score: 0.5382226390858776
Category	Term	Count	%	PValue	Genes	List Total	Pop Hits	Pop Total	Fold Enrichment	Bonferroni	Benjamini	FDR
GOTERM_BP_FAT	GO:0009743~response to carbohydrate stimulus	5	0.637755	0.243044	ILMN_1691413, ILMN_1736042, ILMN_1682757, ILMN_1733421, ILMN_1710859	568	60	13528	1.98474	1	0.913705	99.2768
GOTERM_BP_FAT	GO:0009749~response to glucose stimulus	4	0.510204	0.291745	ILMN_1691413, ILMN_1682757, ILMN_1733421, ILMN_1710859	568	45	13528	2.11706	1	0.940047	99.7772
GOTERM_BP_FAT	GO:0009746~response to hexose stimulus	4	0.510204	0.314928	ILMN_1691413, ILMN_1682757, ILMN_1733421, ILMN_1710859	568	47	13528	2.02697	1	0.948376	99.8764
GOTERM_BP_FAT	GO:0034284~response to monosaccharide stimulus	4	0.510204	0.314928	ILMN_1691413, ILMN_1682757, ILMN_1733421, ILMN_1710859	568	47	13528	2.02697	1	0.948376	99.8764
Annotation Cluster 131	Enrichment Score: 0.5318041025168906
Category	Term	Count	%	PValue	Genes	List Total	Pop Hits	Pop Total	Fold Enrichment	Bonferroni	Benjamini	FDR
UP_SEQ_FEATURE	repeat:LRR 7	14	1.78571	0.0289348	ILMN_1756959, ILMN_1685472, ILMN_1663037, ILMN_1810593, ILMN_1756755, ILMN_1688639, ILMN_1765855, ILMN_1739235, ILMN_1738639, ILMN_1676449, ILMN_1712026, ILMN_1756230, ILMN_1680774, ILMN_1769615	778	177	19113	1.94314	1	0.724025	39.6687
UP_SEQ_FEATURE	repeat:LRR 9	9	1.14796	0.184462	ILMN_1765855, ILMN_1688639, ILMN_1676449, ILMN_1756959, ILMN_1685472, ILMN_1663037, ILMN_1810593, ILMN_1769615, ILMN_1756755	778	135	19113	1.63779	1	0.990158	97.0082
UP_SEQ_FEATURE	repeat:LRR 10	8	1.02041	0.198962	ILMN_1765855, ILMN_1688639, ILMN_1676449, ILMN_1756959, ILMN_1685472, ILMN_1810593, ILMN_1769615, ILMN_1756755	778	117	19113	1.67978	1	0.991864	97.8029
UP_SEQ_FEATURE	repeat:LRR 8	9	1.14796	0.260634	ILMN_1765855, ILMN_1688639, ILMN_1676449, ILMN_1756959, ILMN_1685472, ILMN_1663037, ILMN_1810593, ILMN_1769615, ILMN_1756755	778	149	19113	1.4839	1	0.996974	99.4466
UP_SEQ_FEATURE	repeat:LRR 18	3	0.382653	0.300819	ILMN_1676449, ILMN_1756959, ILMN_1810593	778	27	19113	2.72965	1	0.99822	99.7885
UP_SEQ_FEATURE	repeat:LRR 13	5	0.637755	0.37325	ILMN_1765855, ILMN_1676449, ILMN_1756959, ILMN_1810593, ILMN_1756755	778	76	19113	1.61624	1	0.999435	99.9678
UP_SEQ_FEATURE	repeat:LRR 11	6	0.765306	0.400407	ILMN_1765855, ILMN_1688639, ILMN_1676449, ILMN_1756959, ILMN_1810593, ILMN_1756755	778	102	19113	1.44511	1	0.99962	99.985
UP_SEQ_FEATURE	repeat:LRR 17	3	0.382653	0.433275	ILMN_1676449, ILMN_1756959, ILMN_1810593	778	36	19113	2.04724	1	0.99978	99.9943
UP_SEQ_FEATURE	repeat:LRR 14	4	0.510204	0.443015	ILMN_1765855, ILMN_1676449, ILMN_1756959, ILMN_1810593	778	60	19113	1.63779	1	0.999795	99.9958
UP_SEQ_FEATURE	repeat:LRR 12	5	0.637755	0.509092	ILMN_1765855, ILMN_1676449, ILMN_1756959, ILMN_1810593, ILMN_1756755	778	91	19113	1.34983	1	0.99995	99.9995
UP_SEQ_FEATURE	repeat:LRR 16	3	0.382653	0.551183	ILMN_1676449, ILMN_1756959, ILMN_1810593	778	45	19113	1.63779	1	0.999976	99.9999
UP_SEQ_FEATURE	repeat:LRR 15	3	0.382653	0.619644	ILMN_1676449, ILMN_1756959, ILMN_1810593	778	51	19113	1.44511	1	0.999994	100
Annotation Cluster 132	Enrichment Score: 0.5213862868417243
Category	Term	Count	%	PValue	Genes	List Total	Pop Hits	Pop Total	Fold Enrichment	Bonferroni	Benjamini	FDR
GOTERM_BP_FAT	GO:0001505~regulation of neurotransmitter levels	6	0.765306	0.149071	ILMN_1663640, ILMN_1810550, ILMN_1740024, ILMN_1693604, ILMN_1757081, ILMN_1666904	568	67	13528	2.13286	1	0.819601	94.2598
GOTERM_BP_FAT	GO:0003001~generation of a signal involved in cell-cell signaling	6	0.765306	0.284299	ILMN_1810550, ILMN_1757497, ILMN_1665219, ILMN_1693604, ILMN_1757081, ILMN_1809695	568	85	13528	1.68119	1	0.936952	99.7319
GOTERM_BP_FAT	GO:0007269~neurotransmitter secretion	3	0.382653	0.42006	ILMN_1810550, ILMN_1693604, ILMN_1757081	568	34	13528	2.10149	1	0.974454	99.9935
GOTERM_BP_FAT	GO:0006836~neurotransmitter transport	5	0.637755	0.461291	ILMN_1810550, ILMN_1693604, ILMN_1757081, ILMN_1767842, ILMN_1666904	568	83	13528	1.43475	1	0.981808	99.9982
Annotation Cluster 133	Enrichment Score: 0.5155214764187918
Category	Term	Count	%	PValue	Genes	List Total	Pop Hits	Pop Total	Fold Enrichment	Bonferroni	Benjamini	FDR
INTERPRO	IPR001478:PDZ/DHR/GLGF	9	1.14796	0.27428	ILMN_1742003, ILMN_1690125, ILMN_1732923, ILMN_1681777, ILMN_1776708, ILMN_1810593, ILMN_1729095, ILMN_1658081, ILMN_1705210	689	149	16659	1.46045	1	0.968164	99.4015
UP_SEQ_FEATURE	domain:PDZ	7	0.892857	0.290066	ILMN_1742003, ILMN_1690125, ILMN_1732923, ILMN_1681777, ILMN_1776708, ILMN_1810593, ILMN_1705210	778	110	19113	1.56334	1	0.998021	99.7249
SMART	SM00228:PDZ	9	1.14796	0.357062	ILMN_1742003, ILMN_1690125, ILMN_1732923, ILMN_1681777, ILMN_1776708, ILMN_1810593, ILMN_1729095, ILMN_1658081, ILMN_1705210	410	149	9079	1.33755	1	0.867421	99.6309
Annotation Cluster 134	Enrichment Score: 0.5074500324093628
Category	Term	Count	%	PValue	Genes	List Total	Pop Hits	Pop Total	Fold Enrichment	Bonferroni	Benjamini	FDR
GOTERM_BP_FAT	GO:0044093~positive regulation of molecular function	34	4.33673	0.051811	ILMN_1746027, ILMN_1715496, ILMN_1703006, ILMN_1779875, ILMN_1732636, ILMN_1810691, ILMN_1808136, ILMN_1698307, ILMN_1724863, ILMN_1728650, ILMN_1664071, ILMN_1758939, ILMN_1666445, ILMN_1708588, ILMN_1682757, ILMN_1787552, ILMN_1733259, ILMN_1763344, ILMN_1754375, ILMN_1712943, ILMN_1751689, ILMN_1797604, ILMN_1724066, ILMN_1682738, ILMN_1673521, ILMN_1689043, ILMN_1761280, ILMN_1667081, ILMN_16…	568	586	13528	1.38187	1	0.543302	61.0078
GOTERM_BP_FAT	GO:0043085~positive regulation of catalytic activity	29	3.69898	0.104592	ILMN_1715496, ILMN_1746027, ILMN_1779875, ILMN_1703006, ILMN_1732636, ILMN_1810691, ILMN_1698307, ILMN_1728650, ILMN_1664071, ILMN_1708588, ILMN_1682757, ILMN_1787552, ILMN_1733259, ILMN_1763344, ILMN_1754375, ILMN_1712943, ILMN_1751689, ILMN_1797604, ILMN_1724066, ILMN_1682738, ILMN_1673521, ILMN_1689043, ILMN_1761280, ILMN_1667081, ILMN_1691237, ILMN_1712026, ILMN_1767145, ILMN_1680774, ILMN_17…	568	520	13528	1.32825	1	0.724375	85.8536
GOTERM_BP_FAT	GO:0043549~regulation of kinase activity	19	2.42347	0.242826	ILMN_1754375, ILMN_1715496, ILMN_1779875, ILMN_1712943, ILMN_1751689, ILMN_1732636, ILMN_1688877, ILMN_1810691, ILMN_1673521, ILMN_1698307, ILMN_1671809, ILMN_1689043, ILMN_1758067, ILMN_1771800, ILMN_1667081, ILMN_1728650, ILMN_1708588, ILMN_1682757, ILMN_1717803	568	357	13528	1.26757	1	0.914208	99.2732
GOTERM_BP_FAT	GO:0051338~regulation of transferase activity	19	2.42347	0.299488	ILMN_1754375, ILMN_1715496, ILMN_1779875, ILMN_1712943, ILMN_1751689, ILMN_1732636, ILMN_1688877, ILMN_1810691, ILMN_1673521, ILMN_1698307, ILMN_1671809, ILMN_1689043, ILMN_1758067, ILMN_1771800, ILMN_1667081, ILMN_1728650, ILMN_1708588, ILMN_1682757, ILMN_1717803	568	372	13528	1.21645	1	0.942142	99.8166
GOTERM_BP_FAT	GO:0033674~positive regulation of kinase activity	12	1.53061	0.377165	ILMN_1667081, ILMN_1754375, ILMN_1715496, ILMN_1728650, ILMN_1712943, ILMN_1751689, ILMN_1732636, ILMN_1708588, ILMN_1682757, ILMN_1810691, ILMN_1673521, ILMN_1698307	568	231	13528	1.23724	1	0.966312	99.9771
GOTERM_BP_FAT	GO:0045859~regulation of protein kinase activity	17	2.16837	0.377341	ILMN_1715496, ILMN_1754375, ILMN_1779875, ILMN_1712943, ILMN_1751689, ILMN_1732636, ILMN_1688877, ILMN_1810691, ILMN_1673521, ILMN_1698307, ILMN_1671809, ILMN_1689043, ILMN_1758067, ILMN_1771800, ILMN_1667081, ILMN_1708588, ILMN_1717803	568	345	13528	1.17359	1	0.966062	99.9772
GOTERM_BP_FAT	GO:0051347~positive regulation of transferase activity	12	1.53061	0.426016	ILMN_1667081, ILMN_1754375, ILMN_1715496, ILMN_1728650, ILMN_1712943, ILMN_1751689, ILMN_1732636, ILMN_1708588, ILMN_1682757, ILMN_1810691, ILMN_1673521, ILMN_1698307	568	240	13528	1.19085	1	0.975702	99.9946
GOTERM_BP_FAT	GO:0051174~regulation of phosphorus metabolic process	22	2.80612	0.470785	ILMN_1754375, ILMN_1715496, ILMN_1779875, ILMN_1712943, ILMN_1751689, ILMN_1732636, ILMN_1688877, ILMN_1810691, ILMN_1682738, ILMN_1673521, ILMN_1664855, ILMN_1698307, ILMN_1671809, ILMN_1689043, ILMN_1758067, ILMN_1771800, ILMN_1667081, ILMN_1728650, ILMN_1713686, ILMN_1708588, ILMN_1682757, ILMN_1717803	568	485	13528	1.08035	1	0.98259	99.9987
GOTERM_BP_FAT	GO:0019220~regulation of phosphate metabolic process	22	2.80612	0.470785	ILMN_1754375, ILMN_1715496, ILMN_1779875, ILMN_1712943, ILMN_1751689, ILMN_1732636, ILMN_1688877, ILMN_1810691, ILMN_1682738, ILMN_1673521, ILMN_1664855, ILMN_1698307, ILMN_1671809, ILMN_1689043, ILMN_1758067, ILMN_1771800, ILMN_1667081, ILMN_1728650, ILMN_1713686, ILMN_1708588, ILMN_1682757, ILMN_1717803	568	485	13528	1.08035	1	0.98259	99.9987
GOTERM_BP_FAT	GO:0042325~regulation of phosphorylation	21	2.67857	0.494301	ILMN_1754375, ILMN_1715496, ILMN_1779875, ILMN_1712943, ILMN_1751689, ILMN_1732636, ILMN_1688877, ILMN_1810691, ILMN_1673521, ILMN_1664855, ILMN_1698307, ILMN_1671809, ILMN_1689043, ILMN_1758067, ILMN_1771800, ILMN_1667081, ILMN_1728650, ILMN_1713686, ILMN_1708588, ILMN_1682757, ILMN_1717803	568	466	13528	1.07329	1	0.98508	99.9994
GOTERM_BP_FAT	GO:0032147~activation of protein kinase activity	6	0.765306	0.523374	ILMN_1712943, ILMN_1751689, ILMN_1732636, ILMN_1708588, ILMN_1810691, ILMN_1673521	568	114	13528	1.25352	1	0.988236	99.9998
GOTERM_BP_FAT	GO:0045860~positive regulation of protein kinase activity	10	1.27551	0.594105	ILMN_1667081, ILMN_1754375, ILMN_1715496, ILMN_1712943, ILMN_1751689, ILMN_1732636, ILMN_1708588, ILMN_1810691, ILMN_1673521, ILMN_1698307	568	223	13528	1.06802	1	0.993109	100
Annotation Cluster 135	Enrichment Score: 0.5062173889759509
Category	Term	Count	%	PValue	Genes	List Total	Pop Hits	Pop Total	Fold Enrichment	Bonferroni	Benjamini	FDR
UP_SEQ_FEATURE	domain:CRAL-TRIO	3	0.382653	0.285584	ILMN_1752750, ILMN_1692664, ILMN_1707798	778	26	19113	2.83464	1	0.997901	99.6935
INTERPRO	IPR001251:Cellular retinaldehyde-binding/triple function, C-terminal	3	0.382653	0.307356	ILMN_1752750, ILMN_1692664, ILMN_1707798	689	27	16659	2.6865	1	0.976774	99.7158
SMART	SM00516:SEC14	3	0.382653	0.345122	ILMN_1752750, ILMN_1692664, ILMN_1707798	410	27	9079	2.46043	1	0.861723	99.5339
Annotation Cluster 136	Enrichment Score: 0.5024350803295323
Category	Term	Count	%	PValue	Genes	List Total	Pop Hits	Pop Total	Fold Enrichment	Bonferroni	Benjamini	FDR
UP_SEQ_FEATURE	lipid moiety-binding region:S-geranylgeranyl cysteine	9	1.14796	0.0559501	ILMN_1788813, ILMN_1651838, ILMN_1733045, ILMN_1807925, ILMN_1688877, ILMN_1752299, ILMN_1685820, ILMN_1676358, ILMN_1738266	778	102	19113	2.16766	1	0.86031	62.8757
INTERPRO	IPR003579:Ras small GTPase, Rab type	3	0.382653	0.723664	ILMN_1733045, ILMN_1752299, ILMN_1685820	689	61	16659	1.18911	1	0.99995	100
SMART	SM00175:RAB	3	0.382653	0.767992	ILMN_1733045, ILMN_1752299, ILMN_1685820	410	61	9079	1.08904	1	0.993166	100
Annotation Cluster 137	Enrichment Score: 0.49531828788295795
Category	Term	Count	%	PValue	Genes	List Total	Pop Hits	Pop Total	Fold Enrichment	Bonferroni	Benjamini	FDR
GOTERM_BP_FAT	GO:0042472~inner ear morphogenesis	5	0.637755	0.207052	ILMN_1759598, ILMN_1789507, ILMN_1726745, ILMN_1764709, ILMN_1788291	568	56	13528	2.12651	1	0.888173	98.3542
GOTERM_BP_FAT	GO:0007605~sensory perception of sound	7	0.892857	0.221398	ILMN_1749662, ILMN_1772366, ILMN_1789507, ILMN_1726745, ILMN_1652465, ILMN_1767842, ILMN_1788291	568	97	13528	1.71875	1	0.897686	98.8088
GOTERM_BP_FAT	GO:0050954~sensory perception of mechanical stimulus	7	0.892857	0.263213	ILMN_1749662, ILMN_1772366, ILMN_1789507, ILMN_1726745, ILMN_1652465, ILMN_1767842, ILMN_1788291	568	103	13528	1.61862	1	0.925006	99.5517
GOTERM_BP_FAT	GO:0042471~ear morphogenesis	5	0.637755	0.299254	ILMN_1759598, ILMN_1789507, ILMN_1726745, ILMN_1764709, ILMN_1788291	568	66	13528	1.80431	1	0.942499	99.8155
SP_PIR_KEYWORDS	non-syndromic deafness	3	0.382653	0.510392	ILMN_1726745, ILMN_1652465, ILMN_1767842	778	42	19235	1.76598	1	0.939347	99.9962
SP_PIR_KEYWORDS	deafness	5	0.637755	0.578877	ILMN_1789507, ILMN_1726745, ILMN_1712026, ILMN_1652465, ILMN_1767842	778	100	19235	1.23618	1	0.961499	99.9996
Annotation Cluster 138	Enrichment Score: 0.48646170231392116
Category	Term	Count	%	PValue	Genes	List Total	Pop Hits	Pop Total	Fold Enrichment	Bonferroni	Benjamini	FDR
GOTERM_BP_FAT	GO:0043542~endothelial cell migration	4	0.510204	0.0624313	ILMN_1749662, ILMN_1766925, ILMN_1676449, ILMN_1703178	568	22	13528	4.33035	1	0.58882	68.0567
GOTERM_BP_FAT	GO:0048514~blood vessel morphogenesis	11	1.40306	0.391324	ILMN_1779875, ILMN_1792409, ILMN_1766925, ILMN_1801833, ILMN_1749662, ILMN_1703178, ILMN_1676449, ILMN_1699574, ILMN_1690807, ILMN_1679754, ILMN_1765876, ILMN_1669898, ILMN_1775441	568	211	13528	1.24164	1	0.969421	99.9848
GOTERM_BP_FAT	GO:0001525~angiogenesis	8	1.02041	0.427112	ILMN_1779875, ILMN_1749662, ILMN_1766925, ILMN_1699574, ILMN_1676449, ILMN_1703178, ILMN_1765876, ILMN_1669898, ILMN_1801833, ILMN_1775441	568	148	13528	1.2874	1	0.975778	99.9948
GOTERM_BP_FAT	GO:0001568~blood vessel development	11	1.40306	0.579906	ILMN_1779875, ILMN_1792409, ILMN_1766925, ILMN_1801833, ILMN_1749662, ILMN_1703178, ILMN_1676449, ILMN_1699574, ILMN_1690807, ILMN_1679754, ILMN_1765876, ILMN_1669898, ILMN_1775441	568	245	13528	1.06933	1	0.992416	100
GOTERM_BP_FAT	GO:0001944~vasculature development	11	1.40306	0.610735	ILMN_1779875, ILMN_1792409, ILMN_1766925, ILMN_1801833, ILMN_1749662, ILMN_1703178, ILMN_1676449, ILMN_1699574, ILMN_1690807, ILMN_1679754, ILMN_1765876, ILMN_1669898, ILMN_1775441	568	251	13528	1.04377	1	0.994028	100
Annotation Cluster 139	Enrichment Score: 0.48004486959207027
Category	Term	Count	%	PValue	Genes	List Total	Pop Hits	Pop Total	Fold Enrichment	Bonferroni	Benjamini	FDR
SP_PIR_KEYWORDS	manganese	9	1.14796	0.272465	ILMN_1709907, ILMN_1788149, ILMN_1751753, ILMN_1761093, ILMN_1738212, ILMN_1652017, ILMN_1676526, ILMN_1726769, ILMN_1657810	778	152	19235	1.4639	1	0.818675	98.9291
GOTERM_MF_FAT	GO:0030145~manganese ion binding	9	1.14796	0.341239	ILMN_1709907, ILMN_1788149, ILMN_1751753, ILMN_1761093, ILMN_1738212, ILMN_1652017, ILMN_1659197, ILMN_1736042, ILMN_1657810	558	154	12983	1.35976	1	0.971023	99.836
UP_SEQ_FEATURE	metal ion-binding site:Manganese	3	0.382653	0.390387	ILMN_1761093, ILMN_1652017, ILMN_1657810	778	33	19113	2.23335	1	0.999538	99.98
Annotation Cluster 140	Enrichment Score: 0.46767267205336094
Category	Term	Count	%	PValue	Genes	List Total	Pop Hits	Pop Total	Fold Enrichment	Bonferroni	Benjamini	FDR
GOTERM_MF_FAT	GO:0051020~GTPase binding	8	1.02041	0.187413	ILMN_1798029, ILMN_1722037, ILMN_1682929, ILMN_1744046, ILMN_1765860, ILMN_1727248, ILMN_1772686, ILMN_1705210	558	109	12983	1.70767	1	0.895694	95.8777
GOTERM_MF_FAT	GO:0031267~small GTPase binding	7	0.892857	0.265887	ILMN_1798029, ILMN_1722037, ILMN_1682929, ILMN_1744046, ILMN_1727248, ILMN_1772686, ILMN_1705210	558	101	12983	1.61257	1	0.939141	99.1342
GOTERM_MF_FAT	GO:0017048~Rho GTPase binding	3	0.382653	0.48949	ILMN_1798029, ILMN_1744046, ILMN_1727248	558	38	12983	1.83687	1	0.989872	99.9967
GOTERM_MF_FAT	GO:0017016~Ras GTPase binding	5	0.637755	0.552164	ILMN_1798029, ILMN_1722037, ILMN_1682929, ILMN_1744046, ILMN_1727248	558	91	12983	1.27841	1	0.993645	99.9996
Annotation Cluster 141	Enrichment Score: 0.4635409401502249
Category	Term	Count	%	PValue	Genes	List Total	Pop Hits	Pop Total	Fold Enrichment	Bonferroni	Benjamini	FDR
PUBMED_ID	19167335	4	0.510204	0.0527141	ILMN_1720113, ILMN_1728844, ILMN_1698885, ILMN_1753135	783	30	27491	4.68131	1	0.999885	68.0661
GOTERM_MF_FAT	GO:0019198~transmembrane receptor protein phosphatase activity	3	0.382653	0.179322	ILMN_1720113, ILMN_1728844, ILMN_1810962	558	18	12983	3.87784	1	0.890551	95.1998
INTERPRO	IPR000242:Protein-tyrosine phosphatase, receptor/non-receptor type	4	0.510204	0.228041	ILMN_1720113, ILMN_1728844, ILMN_1698885, ILMN_1810962	689	40	16659	2.41785	1	0.946493	98.3955
SMART	SM00194:PTPc	4	0.510204	0.268467	ILMN_1720113, ILMN_1728844, ILMN_1698885, ILMN_1810962	410	40	9079	2.21439	1	0.813681	98.1025
GOTERM_MF_FAT	GO:0016791~phosphatase activity	14	1.78571	0.269919	ILMN_1720113, ILMN_1701603, ILMN_1697220, ILMN_1810962, ILMN_1662482, ILMN_1671809, ILMN_1657810, ILMN_1736670, ILMN_1728844, ILMN_1698885, ILMN_1652017, ILMN_1682757, ILMN_1783388, ILMN_1809695	558	249	12983	1.30819	1	0.938361	99.2044
SP_PIR_KEYWORDS	phosphoric monoester hydrolase	5	0.637755	0.304108	ILMN_1720113, ILMN_1728844, ILMN_1701603, ILMN_1810962, ILMN_1697220	778	69	19235	1.79157	1	0.834904	99.432
GOTERM_MF_FAT	GO:0004721~phosphoprotein phosphatase activity	9	1.14796	0.413307	ILMN_1720113, ILMN_1728844, ILMN_1698885, ILMN_1652017, ILMN_1810962, ILMN_1671809, ILMN_1809695, ILMN_1657810, ILMN_1736670	558	165	12983	1.26911	1	0.98266	99.9724
SP_PIR_KEYWORDS	protein phosphatase	7	0.892857	0.429072	ILMN_1720113, ILMN_1728844, ILMN_1698885, ILMN_1652017, ILMN_1810962, ILMN_1671809, ILMN_1657810	778	130	19235	1.33127	1	0.913383	99.9662
INTERPRO	IPR000387:Protein-tyrosine phosphatase	5	0.637755	0.431384	ILMN_1720113, ILMN_1728844, ILMN_1698885, ILMN_1810962, ILMN_1671809	689	81	16659	1.4925	1	0.994935	99.9878
UP_SEQ_FEATURE	active site:Phosphocysteine intermediate	5	0.637755	0.437847	ILMN_1720113, ILMN_1728844, ILMN_1698885, ILMN_1810962, ILMN_1671809	778	83	19113	1.47993	1	0.999792	99.995
INTERPRO	IPR000387:Dual-specific/protein-tyrosine phosphatase, conserved region	5	0.637755	0.440657	ILMN_1720113, ILMN_1728844, ILMN_1698885, ILMN_1810962, ILMN_1671809	689	82	16659	1.4743	1	0.995451	99.9906
GOTERM_BP_FAT	GO:0016311~dephosphorylation	8	1.02041	0.468229	ILMN_1720113, ILMN_1728844, ILMN_1698885, ILMN_1652017, ILMN_1810962, ILMN_1662482, ILMN_1671809, ILMN_1657810	568	154	13528	1.23724	1	0.982402	99.9986
GOTERM_BP_FAT	GO:0006470~protein amino acid dephosphorylation	7	0.892857	0.486343	ILMN_1720113, ILMN_1728844, ILMN_1698885, ILMN_1652017, ILMN_1810962, ILMN_1671809, ILMN_1657810	568	133	13528	1.25352	1	0.984369	99.9992
INTERPRO	IPR016130:Protein-tyrosine phosphatase, active site	5	0.637755	0.504097	ILMN_1720113, ILMN_1728844, ILMN_1698885, ILMN_1810962, ILMN_1671809	689	89	16659	1.35834	1	0.998057	99.9986
GOTERM_MF_FAT	GO:0004725~protein tyrosine phosphatase activity	5	0.637755	0.6577	ILMN_1720113, ILMN_1728844, ILMN_1698885, ILMN_1810962, ILMN_1671809	558	104	12983	1.11861	1	0.99731	100
UP_SEQ_FEATURE	domain:Tyrosine-protein phosphatase	3	0.382653	0.72375	ILMN_1720113, ILMN_1728844, ILMN_1671809	778	62	19113	1.18872	1	1	100
Annotation Cluster 142	Enrichment Score: 0.4597814340491593
Category	Term	Count	%	PValue	Genes	List Total	Pop Hits	Pop Total	Fold Enrichment	Bonferroni	Benjamini	FDR
GOTERM_BP_FAT	GO:0032880~regulation of protein localization	11	1.40306	0.0646483	ILMN_1734742, ILMN_1754375, ILMN_1810559, ILMN_1691413, ILMN_1788184, ILMN_1712026, ILMN_1814719, ILMN_1682738, ILMN_1733421, ILMN_1652465, ILMN_1710859	568	138	13528	1.89845	1	0.598124	69.3677
GOTERM_BP_FAT	GO:0050708~regulation of protein secretion	5	0.637755	0.22486	ILMN_1788184, ILMN_1712026, ILMN_1814719, ILMN_1733421, ILMN_1710859	568	58	13528	2.05318	1	0.899336	98.8991
GOTERM_BP_FAT	GO:0070201~regulation of establishment of protein localization	8	1.02041	0.244682	ILMN_1754375, ILMN_1810559, ILMN_1788184, ILMN_1712026, ILMN_1814719, ILMN_1682738, ILMN_1733421, ILMN_1710859	568	121	13528	1.57467	1	0.91462	99.3041
GOTERM_BP_FAT	GO:0050714~positive regulation of protein secretion	4	0.510204	0.245858	ILMN_1712026, ILMN_1814719, ILMN_1733421, ILMN_1710859	568	41	13528	2.3236	1	0.915069	99.323
GOTERM_BP_FAT	GO:0051222~positive regulation of protein transport	5	0.637755	0.308789	ILMN_1712026, ILMN_1814719, ILMN_1682738, ILMN_1733421, ILMN_1710859	568	67	13528	1.77738	1	0.94561	99.8552
GOTERM_BP_FAT	GO:0051223~regulation of protein transport	7	0.892857	0.3441	ILMN_1754375, ILMN_1788184, ILMN_1712026, ILMN_1814719, ILMN_1682738, ILMN_1733421, ILMN_1710859	568	114	13528	1.46244	1	0.957991	99.9428
GOTERM_BP_FAT	GO:0042990~regulation of transcription factor import into nucleus	3	0.382653	0.360043	ILMN_1712026, ILMN_1682738, ILMN_1733421	568	30	13528	2.38169	1	0.96336	99.963
GOTERM_BP_FAT	GO:0033157~regulation of intracellular protein transport	4	0.510204	0.384358	ILMN_1754375, ILMN_1712026, ILMN_1682738, ILMN_1733421	568	53	13528	1.7975	1	0.967794	99.9814
GOTERM_BP_FAT	GO:0046822~regulation of nucleocytoplasmic transport	4	0.510204	0.440968	ILMN_1754375, ILMN_1712026, ILMN_1682738, ILMN_1733421	568	58	13528	1.64254	1	0.978385	99.9966
GOTERM_BP_FAT	GO:0051224~negative regulation of protein transport	3	0.382653	0.504272	ILMN_1754375, ILMN_1788184, ILMN_1712026	568	40	13528	1.78627	1	0.986112	99.9996
GOTERM_BP_FAT	GO:0042306~regulation of protein import into nucleus	3	0.382653	0.55584	ILMN_1712026, ILMN_1682738, ILMN_1733421	568	44	13528	1.62388	1	0.990823	99.9999
GOTERM_BP_FAT	GO:0032386~regulation of intracellular transport	4	0.510204	0.576663	ILMN_1754375, ILMN_1712026, ILMN_1682738, ILMN_1733421	568	71	13528	1.3418	1	0.992247	100
GOTERM_BP_FAT	GO:0051098~regulation of binding	7	0.892857	0.623817	ILMN_1724863, ILMN_1758939, ILMN_1807981, ILMN_1666445, ILMN_1712026, ILMN_1682738, ILMN_1733421	568	153	13528	1.08966	1	0.994757	100
GOTERM_BP_FAT	GO:0001817~regulation of cytokine production	8	1.02041	0.639536	ILMN_1724863, ILMN_1758939, ILMN_1807981, ILMN_1788184, ILMN_1712026, ILMN_1682738, ILMN_1733421, ILMN_1693014	568	181	13528	1.05268	1	0.995589	100
Annotation Cluster 143	Enrichment Score: 0.4564268828623645
Category	Term	Count	%	PValue	Genes	List Total	Pop Hits	Pop Total	Fold Enrichment	Bonferroni	Benjamini	FDR
GOTERM_BP_FAT	GO:0021537~telencephalon development	8	1.02041	0.0186411	ILMN_1754375, ILMN_1715189, ILMN_1724162, ILMN_1725772, ILMN_1680184, ILMN_1672094, ILMN_1785380, ILMN_1807016	568	65	13528	2.93131	1	0.313432	28.331
GOTERM_BP_FAT	GO:0021892~cerebral cortex GABAergic interneuron differentiation	3	0.382653	0.0320108	ILMN_1715189, ILMN_1724162, ILMN_1672094	568	7	13528	10.2072	1	0.437	43.7827
GOTERM_BP_FAT	GO:0021543~pallium development	6	0.765306	0.0424005	ILMN_1754375, ILMN_1715189, ILMN_1724162, ILMN_1725772, ILMN_1680184, ILMN_1672094	568	46	13528	3.10655	1	0.489749	53.5586
GOTERM_BP_FAT	GO:0021895~cerebral cortex neuron differentiation	3	0.382653	0.0750821	ILMN_1715189, ILMN_1724162, ILMN_1672094	568	11	13528	6.49552	1	0.632511	74.8848
GOTERM_BP_FAT	GO:0030900~forebrain development	11	1.40306	0.105982	ILMN_1754375, ILMN_1715189, ILMN_1724162, ILMN_1725772, ILMN_1680184, ILMN_1672094, ILMN_1750706, ILMN_1710859, ILMN_1763834, ILMN_1785380, ILMN_1807016	568	152	13528	1.72359	1	0.727728	86.2374
INTERPRO	IPR017970:Homeobox, conserved site	14	1.78571	0.161354	ILMN_1743933, ILMN_1725772, ILMN_1779997, ILMN_1738657, ILMN_1653751, ILMN_1655611, ILMN_1808587, ILMN_1759598, ILMN_1715189, ILMN_1724162, ILMN_1680184, ILMN_1672094, ILMN_1807016, ILMN_1681780	689	232	16659	1.45905	1	0.905509	93.9762
INTERPRO	IPR001356:Homeobox	14	1.78571	0.175436	ILMN_1743933, ILMN_1725772, ILMN_1779997, ILMN_1738657, ILMN_1653751, ILMN_1655611, ILMN_1808587, ILMN_1759598, ILMN_1715189, ILMN_1724162, ILMN_1680184, ILMN_1672094, ILMN_1807016, ILMN_1681780	689	235	16659	1.44042	1	0.914956	95.4032
SP_PIR_KEYWORDS	Homeobox	14	1.78571	0.18199	ILMN_1743933, ILMN_1725772, ILMN_1779997, ILMN_1738657, ILMN_1653751, ILMN_1655611, ILMN_1808587, ILMN_1759598, ILMN_1715189, ILMN_1724162, ILMN_1680184, ILMN_1672094, ILMN_1807016, ILMN_1681780	778	242	19235	1.43029	1	0.718527	94.3016
SMART	SM00389:HOX	14	1.78571	0.257143	ILMN_1743933, ILMN_1725772, ILMN_1779997, ILMN_1738657, ILMN_1653751, ILMN_1655611, ILMN_1808587, ILMN_1759598, ILMN_1715189, ILMN_1724162, ILMN_1680184, ILMN_1672094, ILMN_1807016, ILMN_1681780	410	235	9079	1.31921	1	0.813965	97.6944
INTERPRO	IPR012287:Homeodomain-related	12	1.53061	0.383817	ILMN_1808587, ILMN_1759598, ILMN_1715189, ILMN_1724162, ILMN_1725772, ILMN_1680184, ILMN_1672094, ILMN_1738657, ILMN_1779997, ILMN_1653751, ILMN_1807016, ILMN_1681780	689	238	16659	1.21909	1	0.990472	99.9561
GOTERM_BP_FAT	GO:0021761~limbic system development	3	0.382653	0.390381	ILMN_1754375, ILMN_1725772, ILMN_1672094	568	32	13528	2.23283	1	0.96938	99.9843
GOTERM_MF_FAT	GO:0043565~sequence-specific DNA binding	27	3.44388	0.533028	ILMN_1743933, ILMN_1742544, ILMN_1725772, ILMN_1739450, ILMN_1660063, ILMN_1693014, ILMN_1779997, ILMN_1655611, ILMN_1759598, ILMN_1724162, ILMN_1680184, ILMN_1764709, ILMN_1672094, ILMN_1745578, ILMN_1669876, ILMN_1763207, ILMN_1789596, ILMN_1682738, ILMN_1738657, ILMN_1653751, ILMN_1808587, ILMN_1715189, ILMN_1671151, ILMN_1724832, ILMN_1681780, ILMN_1746658, ILMN_1807016	558	607	12983	1.03494	1	0.992335	99.9992
UP_SEQ_FEATURE	DNA-binding region:Homeobox	8	1.02041	0.657569	ILMN_1759598, ILMN_1715189, ILMN_1724162, ILMN_1725772, ILMN_1680184, ILMN_1672094, ILMN_1738657, ILMN_1807016	778	190	19113	1.03439	1	0.999998	100
GOTERM_MF_FAT	GO:0003700~transcription factor activity	38	4.84694	0.808173	ILMN_1656383, ILMN_1743933, ILMN_1725772, ILMN_1742544, ILMN_1739450, ILMN_1785202, ILMN_1779997, ILMN_1693014, ILMN_1655611, ILMN_1759598, ILMN_1724162, ILMN_1680184, ILMN_1677261, ILMN_1764709, ILMN_1745578, ILMN_1672094, ILMN_1718046, ILMN_1669876, ILMN_1763207, ILMN_1721093, ILMN_1652143, ILMN_1789596, ILMN_1682738, ILMN_1738657, ILMN_1653751, ILMN_1747067, ILMN_1739366, ILMN_1808587, ILMN_17…	558	975	12983	0.906817	1	0.999743	100
GOTERM_MF_FAT	GO:0030528~transcription regulator activity	51	6.5051	0.983593	ILMN_1743933, ILMN_1725772, ILMN_1785202, ILMN_1779997, ILMN_1693014, ILMN_1668411, ILMN_1718046, ILMN_1669876, ILMN_1721093, ILMN_1659197, ILMN_1789596, ILMN_1682738, ILMN_1738657, ILMN_1747067, ILMN_1653751, ILMN_1654422, ILMN_1768534, ILMN_1690807, ILMN_1765558, ILMN_1698224, ILMN_1703487, ILMN_1749799, ILMN_1656383, ILMN_1742544, ILMN_1739450, ILMN_1653466, ILMN_1655611, ILMN_1796589, ILMN_17…	558	1512	12983	0.7848	1	1	100
GOTERM_BP_FAT	GO:0006355~regulation of transcription, DNA-dependent	53	6.7602	0.998758	ILMN_1665761, ILMN_1743933, ILMN_1725772, ILMN_1785202, ILMN_1779997, ILMN_1693014, ILMN_1770454, ILMN_1671843, ILMN_1668411, ILMN_1718046, ILMN_1669876, ILMN_1758825, ILMN_1750181, ILMN_1659197, ILMN_1789596, ILMN_1682738, ILMN_1738657, ILMN_1747067, ILMN_1653751, ILMN_1768534, ILMN_1690807, ILMN_1765558, ILMN_1724832, ILMN_1749799, ILMN_1742544, ILMN_1739450, ILMN_1730845, ILMN_1653466, ILMN_16…	568	1773	13528	0.711955	1	1	100
GOTERM_BP_FAT	GO:0051252~regulation of RNA metabolic process	53	6.7602	0.999373	ILMN_1665761, ILMN_1743933, ILMN_1725772, ILMN_1785202, ILMN_1779997, ILMN_1693014, ILMN_1770454, ILMN_1671843, ILMN_1668411, ILMN_1718046, ILMN_1669876, ILMN_1758825, ILMN_1750181, ILMN_1659197, ILMN_1789596, ILMN_1682738, ILMN_1738657, ILMN_1747067, ILMN_1653751, ILMN_1768534, ILMN_1690807, ILMN_1765558, ILMN_1724832, ILMN_1749799, ILMN_1742544, ILMN_1739450, ILMN_1730845, ILMN_1653466, ILMN_16…	568	1813	13528	0.696247	1	1	100
GOTERM_BP_FAT	GO:0045449~regulation of transcription	77	9.82143	0.999927	ILMN_1665761, ILMN_1743933, ILMN_1691747, ILMN_1725772, ILMN_1785202, ILMN_1764231, ILMN_1779997, ILMN_1693014, ILMN_1770454, ILMN_1795388, ILMN_1671843, ILMN_1724863, ILMN_1758939, ILMN_1807981, ILMN_1668411, ILMN_1718046, ILMN_1669876, ILMN_1758825, ILMN_1750181, ILMN_1721093, ILMN_1789596, ILMN_1659197, ILMN_1810962, ILMN_1682738, ILMN_1738657, ILMN_1653751, ILMN_1747067, ILMN_1768534, ILMN_16…	568	2601	13528	0.705076	1	1	100
SP_PIR_KEYWORDS	dna-binding	48	6.12245	0.999928	ILMN_1749799, ILMN_1656383, ILMN_1788886, ILMN_1743933, ILMN_1725772, ILMN_1742544, ILMN_1739450, ILMN_1802082, ILMN_1785202, ILMN_1790537, ILMN_1730845, ILMN_1653466, ILMN_1785175, ILMN_1750706, ILMN_1660063, ILMN_1779997, ILMN_1693014, ILMN_1795388, ILMN_1655611, ILMN_1759598, ILMN_1724162, ILMN_1680184, ILMN_1804642, ILMN_1721626, ILMN_1764709, ILMN_1745578, ILMN_1733519, ILMN_1672094, ILMN_17…	778	1868	19235	0.635297	1	1	100
SP_PIR_KEYWORDS	transcription regulation	52	6.63265	0.999964	ILMN_1665761, ILMN_1743933, ILMN_1725772, ILMN_1691747, ILMN_1785202, ILMN_1764231, ILMN_1693014, ILMN_1795388, ILMN_1668411, ILMN_1718046, ILMN_1721093, ILMN_1789596, ILMN_1682738, ILMN_1738657, ILMN_1747067, ILMN_1653751, ILMN_1768534, ILMN_1667487, ILMN_1765558, ILMN_1690807, ILMN_1787265, ILMN_1698224, ILMN_1724832, ILMN_1703487, ILMN_1749799, ILMN_1656383, ILMN_1742544, ILMN_1739450, ILMN_18…	778	2026	19235	0.634566	1	1	100
SP_PIR_KEYWORDS	Transcription	52	6.63265	0.999985	ILMN_1665761, ILMN_1743933, ILMN_1725772, ILMN_1691747, ILMN_1785202, ILMN_1764231, ILMN_1693014, ILMN_1795388, ILMN_1668411, ILMN_1718046, ILMN_1721093, ILMN_1789596, ILMN_1682738, ILMN_1738657, ILMN_1747067, ILMN_1653751, ILMN_1768534, ILMN_1667487, ILMN_1765558, ILMN_1690807, ILMN_1787265, ILMN_1698224, ILMN_1724832, ILMN_1703487, ILMN_1749799, ILMN_1656383, ILMN_1742544, ILMN_1739450, ILMN_18…	778	2071	19235	0.620777	1	1	100
GOTERM_BP_FAT	GO:0006350~transcription	53	6.7602	0.999998	ILMN_1665761, ILMN_1743933, ILMN_1725772, ILMN_1691747, ILMN_1785202, ILMN_1764231, ILMN_1693014, ILMN_1795388, ILMN_1668411, ILMN_1718046, ILMN_1721093, ILMN_1789596, ILMN_1682738, ILMN_1653751, ILMN_1747067, ILMN_1768534, ILMN_1667487, ILMN_1765558, ILMN_1690807, ILMN_1787265, ILMN_1698224, ILMN_1724832, ILMN_1703487, ILMN_1749799, ILMN_1656383, ILMN_1742544, ILMN_1739450, ILMN_1802082, ILMN_17…	568	2101	13528	0.600807	1	1	100
GOTERM_MF_FAT	GO:0003677~DNA binding	59	7.52551	1	ILMN_1788886, ILMN_1743933, ILMN_1725772, ILMN_1790537, ILMN_1785202, ILMN_1679460, ILMN_1660063, ILMN_1705384, ILMN_1779997, ILMN_1693014, ILMN_1795388, ILMN_1806320, ILMN_1793360, ILMN_1733519, ILMN_1718046, ILMN_1669876, ILMN_1721093, ILMN_1789596, ILMN_1682738, ILMN_1738657, ILMN_1653751, ILMN_1747067, ILMN_1768534, ILMN_1667487, ILMN_1765558, ILMN_1724832, ILMN_1703487, ILMN_1749799, ILMN_16…	558	2331	12983	0.588912	1	1	100
SP_PIR_KEYWORDS	nucleus	106	13.5204	1	ILMN_1673450, ILMN_1665761, ILMN_1788886, ILMN_1743933, ILMN_1691747, ILMN_1725772, ILMN_1790537, ILMN_1785202, ILMN_1779997, ILMN_1693014, ILMN_1657810, ILMN_1668411, ILMN_1663685, ILMN_1683450, ILMN_1661347, ILMN_1796682, ILMN_1721093, ILMN_1789596, ILMN_1682738, ILMN_1671809, ILMN_1747067, ILMN_1709451, ILMN_1768534, ILMN_1667487, ILMN_1683148, ILMN_1765558, ILMN_1787265, ILMN_1698224, ILMN_16…	778	4283	19235	0.611886	1	1	100
Annotation Cluster 144	Enrichment Score: 0.45569836195257407
Category	Term	Count	%	PValue	Genes	List Total	Pop Hits	Pop Total	Fold Enrichment	Bonferroni	Benjamini	FDR
SP_PIR_KEYWORDS	mitochondrion outer membrane	8	1.02041	0.0226318	ILMN_1663640, ILMN_1684321, ILMN_1727360, ILMN_1666924, ILMN_1665775, ILMN_1660732, ILMN_1737611, ILMN_1721128	778	70	19235	2.82556	0.999977	0.211455	27.8545
GOTERM_CC_FAT	GO:0005741~mitochondrial outer membrane	8	1.02041	0.113979	ILMN_1663640, ILMN_1684321, ILMN_1727360, ILMN_1666924, ILMN_1665775, ILMN_1660732, ILMN_1737611, ILMN_1721128	581	90	12782	1.95556	1	0.522119	81.0245
GOTERM_CC_FAT	GO:0031968~organelle outer membrane	8	1.02041	0.19312	ILMN_1663640, ILMN_1684321, ILMN_1727360, ILMN_1666924, ILMN_1665775, ILMN_1660732, ILMN_1737611, ILMN_1721128	581	104	12782	1.69231	1	0.652922	94.7507
GOTERM_CC_FAT	GO:0019867~outer membrane	8	1.02041	0.21901	ILMN_1663640, ILMN_1684321, ILMN_1727360, ILMN_1666924, ILMN_1665775, ILMN_1660732, ILMN_1737611, ILMN_1721128	581	108	12782	1.62963	1	0.699576	96.6458
UP_SEQ_FEATURE	topological domain:Mitochondrial intermembrane	4	0.510204	0.321055	ILMN_1663640, ILMN_1727360, ILMN_1666924, ILMN_1679949	778	49	19113	2.00546	1	0.998738	99.8724
GOTERM_CC_FAT	GO:0005740~mitochondrial envelope	15	1.91327	0.910933	ILMN_1684321, ILMN_1803509, ILMN_1703006, ILMN_1666924, ILMN_1727360, ILMN_1665775, ILMN_1679949, ILMN_1724367, ILMN_1663640, ILMN_1788184, ILMN_1725241, ILMN_1737611, ILMN_1660732, ILMN_1721128, ILMN_1700306	581	419	12782	0.787589	1	0.996746	100
GOTERM_CC_FAT	GO:0031966~mitochondrial membrane	14	1.78571	0.912333	ILMN_1684321, ILMN_1803509, ILMN_1703006, ILMN_1666924, ILMN_1727360, ILMN_1665775, ILMN_1679949, ILMN_1724367, ILMN_1663640, ILMN_1725241, ILMN_1737611, ILMN_1660732, ILMN_1721128, ILMN_1700306	581	394	12782	0.781726	1	0.996745	100
SP_PIR_KEYWORDS	mitochondrion	25	3.18878	0.970559	ILMN_1684321, ILMN_1703006, ILMN_1803509, ILMN_1666924, ILMN_1727360, ILMN_1744628, ILMN_1797336, ILMN_1663640, ILMN_1724367, ILMN_1671281, ILMN_1726597, ILMN_1726986, ILMN_1761010, ILMN_1665775, ILMN_1735432, ILMN_1740265, ILMN_1679949, ILMN_1733746, ILMN_1751753, ILMN_1713756, ILMN_1811594, ILMN_1660732, ILMN_1737611, ILMN_1721128, ILMN_1680727	778	832	19235	0.742898	1	0.999876	100
GOTERM_CC_FAT	GO:0044429~mitochondrial part	18	2.29592	0.987399	ILMN_1684321, ILMN_1803509, ILMN_1703006, ILMN_1727360, ILMN_1666924, ILMN_1744628, ILMN_1665775, ILMN_1679949, ILMN_1724367, ILMN_1663640, ILMN_1713756, ILMN_1788184, ILMN_1725241, ILMN_1761010, ILMN_1737611, ILMN_1660732, ILMN_1721128, ILMN_1700306	581	595	12782	0.665546	1	0.999928	100
GOTERM_CC_FAT	GO:0005739~mitochondrion	35	4.46429	0.994139	ILMN_1684321, ILMN_1703006, ILMN_1803509, ILMN_1658835, ILMN_1727360, ILMN_1666924, ILMN_1744628, ILMN_1797336, ILMN_1724367, ILMN_1675515, ILMN_1663640, ILMN_1671281, ILMN_1788184, ILMN_1726597, ILMN_1725241, ILMN_1726986, ILMN_1761010, ILMN_1797384, ILMN_1665775, ILMN_1735432, ILMN_1740265, ILMN_1679949, ILMN_1808587, ILMN_1771800, ILMN_1733746, ILMN_1713756, ILMN_1749662, ILMN_1751753, ILMN_17…	581	1087	12782	0.708372	1	0.999984	100
Annotation Cluster 145	Enrichment Score: 0.44999850944020703
Category	Term	Count	%	PValue	Genes	List Total	Pop Hits	Pop Total	Fold Enrichment	Bonferroni	Benjamini	FDR
GOTERM_MF_FAT	GO:0005313~L-glutamate transmembrane transporter activity	3	0.382653	0.0782036	ILMN_1767842, ILMN_1666904, ILMN_1785380	558	11	12983	6.34555	1	0.723882	71.3837
GOTERM_MF_FAT	GO:0015172~acidic amino acid transmembrane transporter activity	3	0.382653	0.0912584	ILMN_1767842, ILMN_1666904, ILMN_1785380	558	12	12983	5.81676	1	0.753984	77.0157
GOTERM_MF_FAT	GO:0015179~L-amino acid transmembrane transporter activity	4	0.510204	0.222152	ILMN_1746116, ILMN_1767842, ILMN_1666904, ILMN_1785380	558	38	12983	2.44916	1	0.917902	97.8934
SP_PIR_KEYWORDS	Symport	7	0.892857	0.292174	ILMN_1675391, ILMN_1815581, ILMN_1797600, ILMN_1673637, ILMN_1767842, ILMN_1666904, ILMN_1785380	778	111	19235	1.55915	1	0.823638	99.2762
GOTERM_MF_FAT	GO:0015171~amino acid transmembrane transporter activity	4	0.510204	0.467427	ILMN_1746116, ILMN_1767842, ILMN_1666904, ILMN_1785380	558	59	12983	1.57743	1	0.988823	99.9938
GOTERM_BP_FAT	GO:0015711~organic anion transport	3	0.382653	0.55584	ILMN_1746116, ILMN_1767842, ILMN_1785380	568	44	13528	1.62388	1	0.990823	99.9999
GOTERM_BP_FAT	GO:0006820~anion transport	7	0.892857	0.557546	ILMN_1746116, ILMN_1658835, ILMN_1707571, ILMN_1652465, ILMN_1767842, ILMN_1739751, ILMN_1785380	568	143	13528	1.16586	1	0.990834	99.9999
GOTERM_MF_FAT	GO:0005275~amine transmembrane transporter activity	4	0.510204	0.620932	ILMN_1746116, ILMN_1767842, ILMN_1666904, ILMN_1785380	558	74	12983	1.25768	1	0.996677	100
GOTERM_BP_FAT	GO:0046942~carboxylic acid transport	5	0.637755	0.869519	ILMN_1746116, ILMN_1673521, ILMN_1705231, ILMN_1767842, ILMN_1785380	568	147	13528	0.810099	1	0.999861	100
GOTERM_BP_FAT	GO:0015849~organic acid transport	5	0.637755	0.872878	ILMN_1746116, ILMN_1673521, ILMN_1705231, ILMN_1767842, ILMN_1785380	568	148	13528	0.804625	1	0.999872	100
Annotation Cluster 146	Enrichment Score: 0.43910580195359356
Category	Term	Count	%	PValue	Genes	List Total	Pop Hits	Pop Total	Fold Enrichment	Bonferroni	Benjamini	FDR
PUBMED_ID	15461802	12	1.53061	0.214741	ILMN_1733045, ILMN_1800179, ILMN_1653464, ILMN_1662198, ILMN_1791396, ILMN_1695432, ILMN_1757347, ILMN_1789405, ILMN_1663685, ILMN_1741540, ILMN_1723978, ILMN_1759195, ILMN_1655941	783	293	27491	1.43795	1	1	99.3876
PUBMED_ID	10591208	13	1.65816	0.317979	ILMN_1750373, ILMN_1733045, ILMN_1658685, ILMN_1800179, ILMN_1653464, ILMN_1740740, ILMN_1692664, ILMN_1662198, ILMN_1695432, ILMN_1757347, ILMN_1718633, ILMN_1759195, ILMN_1741540, ILMN_1723978	783	357	27491	1.27851	1	1	99.9686
CHROMOSOME	22	18	2.29592	0.705294	ILMN_1803559, ILMN_1733045, ILMN_1658685, ILMN_1800179, ILMN_1653464, ILMN_1740740, ILMN_1692664, ILMN_1662198, ILMN_1791396, ILMN_1695432, ILMN_1757347, ILMN_1718633, ILMN_1789405, ILMN_1663685, ILMN_1738266, ILMN_1759195, ILMN_1741540, ILMN_1723978, ILMN_1655941	784	1043	43203	0.951012	1	0.846398	99.9938
Annotation Cluster 147	Enrichment Score: 0.43672578107793547
Category	Term	Count	%	PValue	Genes	List Total	Pop Hits	Pop Total	Fold Enrichment	Bonferroni	Benjamini	FDR
GOTERM_CC_FAT	GO:0031985~Golgi cisterna	3	0.382653	0.263511	ILMN_1689251, ILMN_1749738, ILMN_1740407	581	22	12782	3	1	0.743181	98.5015
GOTERM_CC_FAT	GO:0031984~organelle subcompartment	3	0.382653	0.297674	ILMN_1689251, ILMN_1749738, ILMN_1740407	581	24	12782	2.75	1	0.780057	99.2195
GOTERM_CC_FAT	GO:0005795~Golgi stack	3	0.382653	0.624141	ILMN_1689251, ILMN_1749738, ILMN_1740407	581	46	12782	1.43478	1	0.946902	99.9999
Annotation Cluster 148	Enrichment Score: 0.43418926420346216
Category	Term	Count	%	PValue	Genes	List Total	Pop Hits	Pop Total	Fold Enrichment	Bonferroni	Benjamini	FDR
SP_PIR_KEYWORDS	electron transport	7	0.892857	0.217478	ILMN_1684321, ILMN_1724367, ILMN_1663575, ILMN_1744628, ILMN_1771179, ILMN_1713471, ILMN_1680727	778	100	19235	1.73066	1	0.778403	96.9728
GOTERM_BP_FAT	GO:0022900~electron transport chain	7	0.892857	0.3441	ILMN_1684321, ILMN_1724367, ILMN_1663575, ILMN_1744628, ILMN_1771179, ILMN_1713471, ILMN_1680727	568	114	13528	1.46244	1	0.957991	99.9428
GOTERM_BP_FAT	GO:0006091~generation of precursor metabolites and energy	13	1.65816	0.665782	ILMN_1684321, ILMN_1803509, ILMN_1744628, ILMN_1757497, ILMN_1713471, ILMN_1763387, ILMN_1736670, ILMN_1663575, ILMN_1724367, ILMN_1751753, ILMN_1771179, ILMN_1810235, ILMN_1680727	568	313	13528	0.9892	1	0.996485	100
Annotation Cluster 149	Enrichment Score: 0.429937663135623
Category	Term	Count	%	PValue	Genes	List Total	Pop Hits	Pop Total	Fold Enrichment	Bonferroni	Benjamini	FDR
GOTERM_CC_FAT	GO:0060053~neurofilament cytoskeleton	4	0.510204	0.00878063	ILMN_1809632, ILMN_1713139, ILMN_1659086, ILMN_1712075	581	10	12782	8.8	0.958205	0.110941	11.4078
GOTERM_CC_FAT	GO:0005883~neurofilament	3	0.382653	0.0272999	ILMN_1809632, ILMN_1713139, ILMN_1659086	581	6	12782	11	0.999953	0.225473	31.6242
GOTERM_MF_FAT	GO:0005200~structural constituent of cytoskeleton	8	1.02041	0.0389925	ILMN_1809632, ILMN_1664071, ILMN_1716407, ILMN_1700042, ILMN_1796901, ILMN_1659086, ILMN_1712075, ILMN_1770454	558	74	12983	2.51535	1	0.533858	45.7256
GOTERM_BP_FAT	GO:0045104~intermediate filament cytoskeleton organization	3	0.382653	0.203631	ILMN_1809632, ILMN_1659086, ILMN_1712075	568	20	13528	3.57254	1	0.885367	98.2239
GOTERM_BP_FAT	GO:0045103~intermediate filament-based process	3	0.382653	0.234893	ILMN_1809632, ILMN_1659086, ILMN_1712075	568	22	13528	3.24776	1	0.90746	99.1259
UP_SEQ_FEATURE	region of interest:Head	4	0.510204	0.574489	ILMN_1730229, ILMN_1809632, ILMN_1659086, ILMN_1712075	778	73	19113	1.34613	1	0.999983	100
UP_SEQ_FEATURE	region of interest:Tail	4	0.510204	0.59294	ILMN_1730229, ILMN_1809632, ILMN_1659086, ILMN_1712075	778	75	19113	1.31023	1	0.999989	100
UP_SEQ_FEATURE	region of interest:Linker 12	3	0.382653	0.73986	ILMN_1809632, ILMN_1659086, ILMN_1712075	778	64	19113	1.15157	1	1	100
UP_SEQ_FEATURE	region of interest:Linker 1	3	0.382653	0.783439	ILMN_1809632, ILMN_1659086, ILMN_1712075	778	70	19113	1.05286	1	1	100
UP_SEQ_FEATURE	region of interest:Coil 1A	3	0.382653	0.783439	ILMN_1809632, ILMN_1659086, ILMN_1712075	778	70	19113	1.05286	1	1	100
UP_SEQ_FEATURE	region of interest:Coil 1B	3	0.382653	0.783439	ILMN_1809632, ILMN_1659086, ILMN_1712075	778	70	19113	1.05286	1	1	100
UP_SEQ_FEATURE	region of interest:Rod	3	0.382653	0.790045	ILMN_1809632, ILMN_1659086, ILMN_1712075	778	71	19113	1.03804	1	1	100
INTERPRO	IPR016044:Filament	3	0.382653	0.803786	ILMN_1809632, ILMN_1659086, ILMN_1712075	689	72	16659	1.00744	1	0.999995	100
INTERPRO	IPR018039:Intermediate filament protein, conserved site	3	0.382653	0.803786	ILMN_1809632, ILMN_1659086, ILMN_1712075	689	72	16659	1.00744	1	0.999995	100
INTERPRO	IPR001664:Intermediate filament protein	3	0.382653	0.809938	ILMN_1809632, ILMN_1659086, ILMN_1712075	689	73	16659	0.993638	1	0.999996	100
SP_PIR_KEYWORDS	Intermediate filament	3	0.382653	0.828787	ILMN_1809632, ILMN_1659086, ILMN_1712075	778	78	19235	0.95091	1	0.994573	100
GOTERM_CC_FAT	GO:0005882~intermediate filament	4	0.510204	0.990706	ILMN_1809632, ILMN_1713139, ILMN_1659086, ILMN_1712075	581	183	12782	0.480874	1	0.999961	100
GOTERM_CC_FAT	GO:0045111~intermediate filament cytoskeleton	4	0.510204	0.991996	ILMN_1809632, ILMN_1713139, ILMN_1659086, ILMN_1712075	581	187	12782	0.470588	1	0.99997	100
Annotation Cluster 150	Enrichment Score: 0.4232864622329632
Category	Term	Count	%	PValue	Genes	List Total	Pop Hits	Pop Total	Fold Enrichment	Bonferroni	Benjamini	FDR
GOTERM_BP_FAT	GO:0051289~protein homotetramerization	3	0.382653	0.297889	ILMN_1654422, ILMN_1797336, ILMN_1749324	568	26	13528	2.7481	1	0.94211	99.809
GOTERM_BP_FAT	GO:0051260~protein homooligomerization	6	0.765306	0.367446	ILMN_1654422, ILMN_1721093, ILMN_1689251, ILMN_1797336, ILMN_1749324, ILMN_1775736	568	95	13528	1.50423	1	0.964731	99.9699
GOTERM_BP_FAT	GO:0051262~protein tetramerization	3	0.382653	0.490786	ILMN_1654422, ILMN_1797336, ILMN_1749324	568	39	13528	1.83207	1	0.984891	99.9994
Annotation Cluster 151	Enrichment Score: 0.4204777172212127
Category	Term	Count	%	PValue	Genes	List Total	Pop Hits	Pop Total	Fold Enrichment	Bonferroni	Benjamini	FDR
UP_SEQ_FEATURE	repeat:Kelch 6	5	0.637755	0.160199	ILMN_1779147, ILMN_1786966, ILMN_1693471, ILMN_1701837, ILMN_1701700	778	52	19113	2.3622	1	0.985632	95.0448
UP_SEQ_FEATURE	repeat:Kelch 5	5	0.637755	0.280548	ILMN_1779147, ILMN_1786966, ILMN_1693471, ILMN_1701837, ILMN_1701700	778	66	19113	1.86112	1	0.997741	99.6541
UP_SEQ_FEATURE	repeat:Kelch 4	5	0.637755	0.31741	ILMN_1779147, ILMN_1786966, ILMN_1693471, ILMN_1701837, ILMN_1701700	778	70	19113	1.75477	1	0.998693	99.8601
INTERPRO	IPR006652:Kelch repeat type 1	5	0.637755	0.318281	ILMN_1779147, ILMN_1786966, ILMN_1693471, ILMN_1701837, ILMN_1701700	689	69	16659	1.75207	1	0.979528	99.7795
INTERPRO	IPR015915:Kelch-type beta propeller	5	0.637755	0.318281	ILMN_1779147, ILMN_1786966, ILMN_1693471, ILMN_1701837, ILMN_1701700	689	69	16659	1.75207	1	0.979528	99.7795
SP_PIR_KEYWORDS	kelch repeat	5	0.637755	0.322516	ILMN_1779147, ILMN_1786966, ILMN_1693471, ILMN_1701837, ILMN_1701700	778	71	19235	1.7411	1	0.849549	99.6125
UP_SEQ_FEATURE	repeat:Kelch 3	5	0.637755	0.326695	ILMN_1779147, ILMN_1786966, ILMN_1693471, ILMN_1701837, ILMN_1701700	778	71	19113	1.73006	1	0.998842	99.8895
UP_SEQ_FEATURE	repeat:Kelch 2	5	0.637755	0.326695	ILMN_1779147, ILMN_1786966, ILMN_1693471, ILMN_1701837, ILMN_1701700	778	71	19113	1.73006	1	0.998842	99.8895
UP_SEQ_FEATURE	repeat:Kelch 1	5	0.637755	0.326695	ILMN_1779147, ILMN_1786966, ILMN_1693471, ILMN_1701837, ILMN_1701700	778	71	19113	1.73006	1	0.998842	99.8895
SMART	SM00612:Kelch	5	0.637755	0.377616	ILMN_1779147, ILMN_1786966, ILMN_1693471, ILMN_1701837, ILMN_1701700	410	69	9079	1.60463	1	0.880449	99.7555
INTERPRO	IPR011705:BTB/Kelch-associated	4	0.510204	0.409191	ILMN_1779147, ILMN_1693471, ILMN_1701837, ILMN_1701700	689	56	16659	1.72704	1	0.993351	99.9776
INTERPRO	IPR013089:Kelch related	4	0.510204	0.639044	ILMN_1779147, ILMN_1739450, ILMN_1701837, ILMN_1701700	689	79	16659	1.22423	1	0.999786	100
UP_SEQ_FEATURE	domain:BTB	5	0.637755	0.834054	ILMN_1779147, ILMN_1740740, ILMN_1701837, ILMN_1793378, ILMN_1701700	778	142	19113	0.86503	1	1	100
INTERPRO	IPR013069:BTB/POZ	3	0.382653	0.969897	ILMN_1779147, ILMN_1701837, ILMN_1701700	689	127	16659	0.571146	1	1	100
Annotation Cluster 152	Enrichment Score: 0.4168138484357495
Category	Term	Count	%	PValue	Genes	List Total	Pop Hits	Pop Total	Fold Enrichment	Bonferroni	Benjamini	FDR
PUBMED_ID	17449559	3	0.382653	0.0664411	ILMN_1663640, ILMN_1720282, ILMN_1727360	783	15	27491	7.02197	1	0.999983	76.5238
GOTERM_MF_FAT	GO:0009055~electron carrier activity	11	1.40306	0.472242	ILMN_1663640, ILMN_1663575, ILMN_1720282, ILMN_1697433, ILMN_1737163, ILMN_1727360, ILMN_1744628, ILMN_1736042, ILMN_1788131, ILMN_1680727	558	221	12983	1.15809	1	0.989097	99.9946
SP_PIR_KEYWORDS	Flavoprotein	4	0.510204	0.812116	ILMN_1663640, ILMN_1663575, ILMN_1720282, ILMN_1727360	778	107	19235	0.924249	1	0.993296	100
SP_PIR_KEYWORDS	FAD	4	0.510204	0.844355	ILMN_1663640, ILMN_1663575, ILMN_1720282, ILMN_1727360	778	114	19235	0.867497	1	0.995614	100
Annotation Cluster 153	Enrichment Score: 0.4153450555256659
Category	Term	Count	%	PValue	Genes	List Total	Pop Hits	Pop Total	Fold Enrichment	Bonferroni	Benjamini	FDR
GOTERM_BP_FAT	GO:0042063~gliogenesis	5	0.637755	0.289755	ILMN_1754375, ILMN_1773459, ILMN_1725772, ILMN_1676449, ILMN_1730845	568	65	13528	1.83207	1	0.939199	99.7658
GOTERM_BP_FAT	GO:0021782~glial cell development	3	0.382653	0.297889	ILMN_1754375, ILMN_1773459, ILMN_1725772	568	26	13528	2.7481	1	0.94211	99.809
GOTERM_BP_FAT	GO:0010001~glial cell differentiation	3	0.382653	0.657475	ILMN_1754375, ILMN_1773459, ILMN_1725772	568	53	13528	1.34813	1	0.996142	100
Annotation Cluster 154	Enrichment Score: 0.41212703529019734
Category	Term	Count	%	PValue	Genes	List Total	Pop Hits	Pop Total	Fold Enrichment	Bonferroni	Benjamini	FDR
GOTERM_CC_FAT	GO:0005578~proteinaceous extracellular matrix	18	2.29592	0.282447	ILMN_1678812, ILMN_1750373, ILMN_1795251, ILMN_1670054, ILMN_1688886, ILMN_1671318, ILMN_1770454, ILMN_1791396, ILMN_1736078, ILMN_1712283, ILMN_1729117, ILMN_1663112, ILMN_1665219, ILMN_1789502, ILMN_1806667, ILMN_1789507, ILMN_1663685, ILMN_1723978, ILMN_1769615, ILMN_1763834	581	320	12782	1.2375	1	0.762978	98.9522
GOTERM_CC_FAT	GO:0044421~extracellular region part	48	6.12245	0.311011	ILMN_1678812, ILMN_1678816, ILMN_1766925, ILMN_1685078, ILMN_1688886, ILMN_1731062, ILMN_1725193, ILMN_1671318, ILMN_1770454, ILMN_1713686, ILMN_1663112, ILMN_1758418, ILMN_1676449, ILMN_1663685, ILMN_1763834, ILMN_1712943, ILMN_1675083, ILMN_1713471, ILMN_1658643, ILMN_1710859, ILMN_1815319, ILMN_1695003, ILMN_1761312, ILMN_1793006, ILMN_1806667, ILMN_1723978, ILMN_1769615, ILMN_1654072, ILMN_17…	581	960	12782	1.1	1	0.789744	99.4002
GOTERM_CC_FAT	GO:0031012~extracellular matrix	18	2.29592	0.39825	ILMN_1678812, ILMN_1750373, ILMN_1795251, ILMN_1670054, ILMN_1688886, ILMN_1671318, ILMN_1770454, ILMN_1791396, ILMN_1736078, ILMN_1712283, ILMN_1729117, ILMN_1663112, ILMN_1665219, ILMN_1789502, ILMN_1806667, ILMN_1789507, ILMN_1663685, ILMN_1723978, ILMN_1769615, ILMN_1763834	581	345	12782	1.14783	1	0.842283	99.9066
SP_PIR_KEYWORDS	extracellular matrix	10	1.27551	0.64213	ILMN_1678812, ILMN_1795251, ILMN_1712283, ILMN_1729117, ILMN_1663112, ILMN_1665219, ILMN_1670054, ILMN_1789507, ILMN_1723978, ILMN_1770454	778	241	19235	1.02588	1	0.970653	100
Annotation Cluster 155	Enrichment Score: 0.410900866188388
Category	Term	Count	%	PValue	Genes	List Total	Pop Hits	Pop Total	Fold Enrichment	Bonferroni	Benjamini	FDR
GOTERM_CC_FAT	GO:0030863~cortical cytoskeleton	5	0.637755	0.181301	ILMN_1805448, ILMN_1795937, ILMN_1797604, ILMN_1681777, ILMN_1671686	581	49	12782	2.2449	1	0.642554	93.5902
GOTERM_CC_FAT	GO:0030864~cortical actin cytoskeleton	3	0.382653	0.365007	ILMN_1805448, ILMN_1797604, ILMN_1681777	581	28	12782	2.35714	1	0.827605	99.8045
GOTERM_CC_FAT	GO:0044448~cell cortex part	5	0.637755	0.523748	ILMN_1805448, ILMN_1795937, ILMN_1797604, ILMN_1681777, ILMN_1671686	581	83	12782	1.3253	1	0.911763	99.9962
GOTERM_CC_FAT	GO:0005938~cell cortex	7	0.892857	0.6555	ILMN_1805448, ILMN_1795937, ILMN_1722726, ILMN_1797604, ILMN_1681777, ILMN_1698307, ILMN_1671686	581	146	12782	1.05479	1	0.955799	100
Annotation Cluster 156	Enrichment Score: 0.4098868825762739
Category	Term	Count	%	PValue	Genes	List Total	Pop Hits	Pop Total	Fold Enrichment	Bonferroni	Benjamini	FDR
UP_SEQ_FEATURE	domain:IQ	5	0.637755	0.218088	ILMN_1678423, ILMN_1652017, ILMN_1654598, ILMN_1705686, ILMN_1669714	778	59	19113	2.08194	1	0.993344	98.5505
INTERPRO	IPR000048:IQ calmodulin-binding region	5	0.637755	0.48627	ILMN_1678423, ILMN_1652017, ILMN_1654598, ILMN_1705686, ILMN_1669714	689	87	16659	1.38957	1	0.997589	99.9976
SMART	SM00015:IQ	5	0.637755	0.555687	ILMN_1678423, ILMN_1652017, ILMN_1654598, ILMN_1705686, ILMN_1669714	410	87	9079	1.27264	1	0.960438	99.9966
Annotation Cluster 157	Enrichment Score: 0.40953264874947753
Category	Term	Count	%	PValue	Genes	List Total	Pop Hits	Pop Total	Fold Enrichment	Bonferroni	Benjamini	FDR
GOTERM_MF_FAT	GO:0008146~sulfotransferase activity	4	0.510204	0.351567	ILMN_1677719, ILMN_1670926, ILMN_1712475, ILMN_1695432	558	49	12983	1.89935	1	0.97367	99.8714
INTERPRO	IPR000863:Sulfotransferase	3	0.382653	0.368333	ILMN_1677719, ILMN_1670926, ILMN_1712475	689	31	16659	2.33986	1	0.988831	99.9347
GOTERM_MF_FAT	GO:0016782~transferase activity, transferring sulfur-containing groups	4	0.510204	0.456198	ILMN_1677719, ILMN_1670926, ILMN_1712475, ILMN_1695432	558	58	12983	1.60462	1	0.988006	99.9914
Annotation Cluster 158	Enrichment Score: 0.4053274297690454
Category	Term	Count	%	PValue	Genes	List Total	Pop Hits	Pop Total	Fold Enrichment	Bonferroni	Benjamini	FDR
GOTERM_MF_FAT	GO:0030295~protein kinase activator activity	3	0.382653	0.179322	ILMN_1671777, ILMN_1774945, ILMN_1717803	558	18	12983	3.87784	1	0.890551	95.1998
GOTERM_MF_FAT	GO:0019887~protein kinase regulator activity	6	0.765306	0.267295	ILMN_1678423, ILMN_1794863, ILMN_1711617, ILMN_1671777, ILMN_1774945, ILMN_1717803	558	81	12983	1.72348	1	0.938288	99.1593
GOTERM_MF_FAT	GO:0019209~kinase activator activity	3	0.382653	0.291456	ILMN_1671777, ILMN_1774945, ILMN_1717803	558	25	12983	2.79204	1	0.951126	99.4978
GOTERM_MF_FAT	GO:0019207~kinase regulator activity	6	0.765306	0.369078	ILMN_1678423, ILMN_1794863, ILMN_1711617, ILMN_1671777, ILMN_1774945, ILMN_1717803	558	93	12983	1.5011	1	0.978226	99.9155
SP_PIR_KEYWORDS	growth factor	5	0.637755	0.780386	ILMN_1713686, ILMN_1711617, ILMN_1757497, ILMN_1671777, ILMN_1774945	778	131	19235	0.943651	1	0.990509	100
GOTERM_MF_FAT	GO:0008083~growth factor activity	5	0.637755	0.919201	ILMN_1713686, ILMN_1711617, ILMN_1757497, ILMN_1671777, ILMN_1774945	558	161	12983	0.722578	1	0.999989	100
Annotation Cluster 159	Enrichment Score: 0.3977127131782787
Category	Term	Count	%	PValue	Genes	List Total	Pop Hits	Pop Total	Fold Enrichment	Bonferroni	Benjamini	FDR
GOTERM_MF_FAT	GO:0019212~phosphatase inhibitor activity	3	0.382653	0.370905	ILMN_1750181, ILMN_1736982, ILMN_1664855	558	30	12983	2.3267	1	0.977892	99.9192
GOTERM_MF_FAT	GO:0019888~protein phosphatase regulator activity	4	0.510204	0.398712	ILMN_1750181, ILMN_1736982, ILMN_1660732, ILMN_1664855	558	53	12983	1.756	1	0.980596	99.9597
GOTERM_MF_FAT	GO:0019208~phosphatase regulator activity	4	0.510204	0.433451	ILMN_1750181, ILMN_1736982, ILMN_1660732, ILMN_1664855	558	56	12983	1.66193	1	0.984444	99.9838
Annotation Cluster 160	Enrichment Score: 0.3934737251801268
Category	Term	Count	%	PValue	Genes	List Total	Pop Hits	Pop Total	Fold Enrichment	Bonferroni	Benjamini	FDR
INTERPRO	IPR003659:Plexin/semaphorin/integrin	4	0.510204	0.284154	ILMN_1765641, ILMN_1702787, ILMN_1786966, ILMN_1794370	689	45	16659	2.1492	1	0.969522	99.5191
SMART	SM00423:PSI	4	0.510204	0.330798	ILMN_1765641, ILMN_1702787, ILMN_1786966, ILMN_1794370	410	45	9079	1.96835	1	0.859522	99.3867
UP_SEQ_FEATURE	domain:Sema	3	0.382653	0.361001	ILMN_1765641, ILMN_1702787, ILMN_1794370	778	31	19113	2.37744	1	0.999391	99.9551
INTERPRO	IPR001627:Semaphorin/CD100 antigen	3	0.382653	0.368333	ILMN_1765641, ILMN_1702787, ILMN_1794370	689	31	16659	2.33986	1	0.988831	99.9347
INTERPRO	IPR002165:Plexin	3	0.382653	0.368333	ILMN_1702787, ILMN_1786966, ILMN_1794370	689	31	16659	2.33986	1	0.988831	99.9347
SMART	SM00630:Sema	3	0.382653	0.410322	ILMN_1765641, ILMN_1702787, ILMN_1794370	410	31	9079	2.14296	1	0.896808	99.8767
INTERPRO	IPR015943:WD40/YVTN repeat-like	9	1.14796	0.932076	ILMN_1765641, ILMN_1673518, ILMN_1702787, ILMN_1660732, ILMN_1794370, ILMN_1692742, ILMN_1735735, ILMN_1775042, ILMN_1802539	689	300	16659	0.725356	1	1	100
Annotation Cluster 161	Enrichment Score: 0.393018864622928
Category	Term	Count	%	PValue	Genes	List Total	Pop Hits	Pop Total	Fold Enrichment	Bonferroni	Benjamini	FDR
GOTERM_BP_FAT	GO:0045216~cell-cell junction organization	5	0.637755	0.0573175	ILMN_1792409, ILMN_1681777, ILMN_1700042, ILMN_1682738, ILMN_1796925	568	35	13528	3.40241	1	0.570606	64.8278
SP_PIR_KEYWORDS	Tight junction	4	0.510204	0.449587	ILMN_1730229, ILMN_1792409, ILMN_1681777, ILMN_1796925	778	61	19235	1.62122	1	0.9189	99.98
GOTERM_CC_FAT	GO:0016327~apicolateral plasma membrane	6	0.765306	0.49525	ILMN_1730229, ILMN_1792409, ILMN_1683148, ILMN_1681777, ILMN_1727633, ILMN_1796925	581	102	12782	1.29412	1	0.899769	99.9916
GOTERM_CC_FAT	GO:0005911~cell-cell junction	10	1.27551	0.496108	ILMN_1730229, ILMN_1663575, ILMN_1792409, ILMN_1681777, ILMN_1700042, ILMN_1796901, ILMN_1810962, ILMN_1729095, ILMN_1727633, ILMN_1796925	581	190	12782	1.15789	1	0.89819	99.9918
GOTERM_CC_FAT	GO:0070160~occluding junction	4	0.510204	0.649905	ILMN_1730229, ILMN_1792409, ILMN_1681777, ILMN_1796925	581	73	12782	1.20548	1	0.954817	99.9999
GOTERM_CC_FAT	GO:0005923~tight junction	4	0.510204	0.649905	ILMN_1730229, ILMN_1792409, ILMN_1681777, ILMN_1796925	581	73	12782	1.20548	1	0.954817	99.9999
GOTERM_CC_FAT	GO:0043296~apical junction complex	5	0.637755	0.663233	ILMN_1730229, ILMN_1792409, ILMN_1681777, ILMN_1727633, ILMN_1796925	581	99	12782	1.11111	1	0.957564	100
Annotation Cluster 162	Enrichment Score: 0.3899418729601568
Category	Term	Count	%	PValue	Genes	List Total	Pop Hits	Pop Total	Fold Enrichment	Bonferroni	Benjamini	FDR
GOTERM_MF_FAT	GO:0042802~identical protein binding	34	4.33673	0.155704	ILMN_1658835, ILMN_1714383, ILMN_1725772, ILMN_1766925, ILMN_1686623, ILMN_1730845, ILMN_1659086, ILMN_1766169, ILMN_1698307, ILMN_1693014, ILMN_1727633, ILMN_1659106, ILMN_1796589, ILMN_1734742, ILMN_1741468, ILMN_1791280, ILMN_1668411, ILMN_1788184, ILMN_1725241, ILMN_1669714, ILMN_1763834, ILMN_1740740, ILMN_1682738, ILMN_1654422, ILMN_1790978, ILMN_1758400, ILMN_1788149, ILMN_1713756, ILMN_16…	558	640	12983	1.23606	1	0.869461	92.577
GOTERM_MF_FAT	GO:0046983~protein dimerization activity	23	2.93367	0.638038	ILMN_1808590, ILMN_1658835, ILMN_1763207, ILMN_1714383, ILMN_1739450, ILMN_1766925, ILMN_1686623, ILMN_1776708, ILMN_1730845, ILMN_1682738, ILMN_1726769, ILMN_1693014, ILMN_1735735, ILMN_1727633, ILMN_1654422, ILMN_1790978, ILMN_1741468, ILMN_1699692, ILMN_1788184, ILMN_1658237, ILMN_1723978, ILMN_1718046, ILMN_1669714	558	542	12983	0.987346	1	0.997122	100
GOTERM_MF_FAT	GO:0042803~protein homodimerization activity	14	1.78571	0.680811	ILMN_1658835, ILMN_1714383, ILMN_1766925, ILMN_1686623, ILMN_1730845, ILMN_1682738, ILMN_1693014, ILMN_1727633, ILMN_1790978, ILMN_1741468, ILMN_1699692, ILMN_1788184, ILMN_1723978, ILMN_1669714	558	334	12983	0.975265	1	0.997924	100
Annotation Cluster 163	Enrichment Score: 0.3883038298279671
Category	Term	Count	%	PValue	Genes	List Total	Pop Hits	Pop Total	Fold Enrichment	Bonferroni	Benjamini	FDR
KEGG_PATHWAY	hsa00230:Purine metabolism	14	1.78571	0.0130887	ILMN_1806533, ILMN_1668675, ILMN_1808590, ILMN_1805098, ILMN_1784783, ILMN_1659197, ILMN_1697220, ILMN_1673991, ILMN_1810691, ILMN_1660063, ILMN_1681356, ILMN_1758398, ILMN_1656593, ILMN_1690676, ILMN_1708588	218	153	5085	2.13438	0.855827	0.241701	14.511
GOTERM_BP_FAT	GO:0006163~purine nucleotide metabolic process	14	1.78571	0.0493918	ILMN_1808590, ILMN_1803509, ILMN_1784783, ILMN_1659197, ILMN_1763387, ILMN_1697220, ILMN_1673991, ILMN_1810691, ILMN_1758398, ILMN_1810559, ILMN_1656593, ILMN_1690676, ILMN_1708588, ILMN_1810235, ILMN_1669714	568	186	13528	1.79267	1	0.531964	59.2086
GOTERM_BP_FAT	GO:0044271~nitrogen compound biosynthetic process	19	2.42347	0.140544	ILMN_1720282, ILMN_1808590, ILMN_1803509, ILMN_1739450, ILMN_1784783, ILMN_1797384, ILMN_1736042, ILMN_1763387, ILMN_1673991, ILMN_1697220, ILMN_1810691, ILMN_1766169, ILMN_1800130, ILMN_1713756, ILMN_1705849, ILMN_1656593, ILMN_1690676, ILMN_1708588, ILMN_1810235, ILMN_1802456	568	325	13528	1.39237	1	0.804793	93.1517
GOTERM_BP_FAT	GO:0009123~nucleoside monophosphate metabolic process	6	0.765306	0.142516	ILMN_1808590, ILMN_1659197, ILMN_1708588, ILMN_1697220, ILMN_1673991, ILMN_1810691	568	66	13528	2.16517	1	0.80825	93.4246
GOTERM_BP_FAT	GO:0009165~nucleotide biosynthetic process	12	1.53061	0.158434	ILMN_1808590, ILMN_1803509, ILMN_1784783, ILMN_1736042, ILMN_1763387, ILMN_1673991, ILMN_1697220, ILMN_1810691, ILMN_1656593, ILMN_1690676, ILMN_1708588, ILMN_1810235, ILMN_1802456	568	186	13528	1.53657	1	0.837166	95.2809
GOTERM_BP_FAT	GO:0006164~purine nucleotide biosynthetic process	10	1.27551	0.169033	ILMN_1808590, ILMN_1803509, ILMN_1656593, ILMN_1690676, ILMN_1784783, ILMN_1763387, ILMN_1708588, ILMN_1810235, ILMN_1697220, ILMN_1673991, ILMN_1810691	568	148	13528	1.60925	1	0.850702	96.2293
GOTERM_BP_FAT	GO:0034654~nucleobase, nucleoside, nucleotide and nucleic acid biosynthetic process	12	1.53061	0.187435	ILMN_1808590, ILMN_1803509, ILMN_1784783, ILMN_1736042, ILMN_1763387, ILMN_1673991, ILMN_1697220, ILMN_1810691, ILMN_1656593, ILMN_1690676, ILMN_1708588, ILMN_1810235, ILMN_1802456	568	193	13528	1.48084	1	0.873305	97.4634
GOTERM_BP_FAT	GO:0034404~nucleobase, nucleoside and nucleotide biosynthetic process	12	1.53061	0.187435	ILMN_1808590, ILMN_1803509, ILMN_1784783, ILMN_1736042, ILMN_1763387, ILMN_1673991, ILMN_1697220, ILMN_1810691, ILMN_1656593, ILMN_1690676, ILMN_1708588, ILMN_1810235, ILMN_1802456	568	193	13528	1.48084	1	0.873305	97.4634
GOTERM_BP_FAT	GO:0009150~purine ribonucleotide metabolic process	9	1.14796	0.222495	ILMN_1803509, ILMN_1810559, ILMN_1656593, ILMN_1690676, ILMN_1784783, ILMN_1763387, ILMN_1810235, ILMN_1697220, ILMN_1673991, ILMN_1669714	568	138	13528	1.55328	1	0.898173	98.8381
GOTERM_BP_FAT	GO:0009259~ribonucleotide metabolic process	9	1.14796	0.275223	ILMN_1803509, ILMN_1810559, ILMN_1656593, ILMN_1690676, ILMN_1784783, ILMN_1763387, ILMN_1810235, ILMN_1697220, ILMN_1673991, ILMN_1669714	568	147	13528	1.45818	1	0.932999	99.6648
GOTERM_BP_FAT	GO:0009205~purine ribonucleoside triphosphate metabolic process	7	0.892857	0.366669	ILMN_1803509, ILMN_1810559, ILMN_1656593, ILMN_1690676, ILMN_1784783, ILMN_1763387, ILMN_1810235, ILMN_1669714	568	117	13528	1.42494	1	0.964749	99.9692
GOTERM_BP_FAT	GO:0009199~ribonucleoside triphosphate metabolic process	7	0.892857	0.37421	ILMN_1803509, ILMN_1810559, ILMN_1656593, ILMN_1690676, ILMN_1784783, ILMN_1763387, ILMN_1810235, ILMN_1669714	568	118	13528	1.41287	1	0.965797	99.9751
GOTERM_BP_FAT	GO:0009144~purine nucleoside triphosphate metabolic process	7	0.892857	0.404389	ILMN_1803509, ILMN_1810559, ILMN_1656593, ILMN_1690676, ILMN_1784783, ILMN_1763387, ILMN_1810235, ILMN_1669714	568	122	13528	1.36654	1	0.972958	99.9896
GOTERM_BP_FAT	GO:0009141~nucleoside triphosphate metabolic process	7	0.892857	0.47165	ILMN_1803509, ILMN_1810559, ILMN_1656593, ILMN_1690676, ILMN_1784783, ILMN_1763387, ILMN_1810235, ILMN_1669714	568	131	13528	1.27266	1	0.982597	99.9988
GOTERM_BP_FAT	GO:0015985~energy coupled proton transport, down electrochemical gradient	3	0.382653	0.504272	ILMN_1803509, ILMN_1763387, ILMN_1810235	568	40	13528	1.78627	1	0.986112	99.9996
GOTERM_BP_FAT	GO:0015986~ATP synthesis coupled proton transport	3	0.382653	0.504272	ILMN_1803509, ILMN_1763387, ILMN_1810235	568	40	13528	1.78627	1	0.986112	99.9996
GOTERM_BP_FAT	GO:0009152~purine ribonucleotide biosynthetic process	6	0.765306	0.546622	ILMN_1803509, ILMN_1656593, ILMN_1690676, ILMN_1784783, ILMN_1763387, ILMN_1810235, ILMN_1673991	568	117	13528	1.22138	1	0.989982	99.9999
SP_PIR_KEYWORDS	Hydrogen ion transport	3	0.382653	0.582942	ILMN_1803509, ILMN_1763387, ILMN_1810235	778	48	19235	1.54523	1	0.961889	99.9996
GOTERM_BP_FAT	GO:0009260~ribonucleotide biosynthetic process	6	0.765306	0.598639	ILMN_1803509, ILMN_1656593, ILMN_1690676, ILMN_1784783, ILMN_1763387, ILMN_1810235, ILMN_1673991	568	124	13528	1.15243	1	0.993311	100
GOTERM_CC_FAT	GO:0016469~proton-transporting two-sector ATPase complex	3	0.382653	0.612112	ILMN_1803509, ILMN_1763387, ILMN_1810235	581	45	12782	1.46667	1	0.947086	99.9998
GOTERM_BP_FAT	GO:0034220~ion transmembrane transport	3	0.382653	0.614779	ILMN_1803509, ILMN_1763387, ILMN_1810235	568	49	13528	1.45818	1	0.994295	100
GOTERM_BP_FAT	GO:0046034~ATP metabolic process	5	0.637755	0.646877	ILMN_1803509, ILMN_1656593, ILMN_1690676, ILMN_1763387, ILMN_1810235, ILMN_1669714	568	105	13528	1.13414	1	0.995817	100
GOTERM_BP_FAT	GO:0015992~proton transport	3	0.382653	0.731415	ILMN_1803509, ILMN_1763387, ILMN_1810235	568	61	13528	1.17132	1	0.998309	100
GOTERM_BP_FAT	GO:0006818~hydrogen transport	3	0.382653	0.747642	ILMN_1803509, ILMN_1763387, ILMN_1810235	568	63	13528	1.13414	1	0.998653	100
GOTERM_BP_FAT	GO:0009206~purine ribonucleoside triphosphate biosynthetic process	4	0.510204	0.784509	ILMN_1803509, ILMN_1784783, ILMN_1763387, ILMN_1810235	568	98	13528	0.972118	1	0.999239	100
GOTERM_BP_FAT	GO:0006119~oxidative phosphorylation	4	0.510204	0.784509	ILMN_1724367, ILMN_1803509, ILMN_1763387, ILMN_1810235	568	98	13528	0.972118	1	0.999239	100
GOTERM_BP_FAT	GO:0009145~purine nucleoside triphosphate biosynthetic process	4	0.510204	0.790258	ILMN_1803509, ILMN_1784783, ILMN_1763387, ILMN_1810235	568	99	13528	0.962299	1	0.999303	100
GOTERM_BP_FAT	GO:0009201~ribonucleoside triphosphate biosynthetic process	4	0.510204	0.790258	ILMN_1803509, ILMN_1784783, ILMN_1763387, ILMN_1810235	568	99	13528	0.962299	1	0.999303	100
GOTERM_BP_FAT	GO:0009142~nucleoside triphosphate biosynthetic process	4	0.510204	0.806742	ILMN_1803509, ILMN_1784783, ILMN_1763387, ILMN_1810235	568	102	13528	0.933996	1	0.999469	100
GOTERM_BP_FAT	GO:0006754~ATP biosynthetic process	3	0.382653	0.892481	ILMN_1803509, ILMN_1763387, ILMN_1810235	568	89	13528	0.802817	1	0.999925	100
GOTERM_MF_FAT	GO:0015078~hydrogen ion transmembrane transporter activity	3	0.382653	0.903512	ILMN_1803509, ILMN_1763387, ILMN_1810235	558	90	12983	0.775568	1	0.999978	100
KEGG_PATHWAY	hsa00190:Oxidative phosphorylation	4	0.510204	0.921742	ILMN_1724367, ILMN_1803509, ILMN_1763387, ILMN_1810235	218	130	5085	0.717713	1	0.998249	100
GOTERM_MF_FAT	GO:0015077~monovalent inorganic cation transmembrane transporter activity	3	0.382653	0.941478	ILMN_1803509, ILMN_1763387, ILMN_1810235	558	104	12983	0.671164	1	0.999996	100
GOTERM_MF_FAT	GO:0022890~inorganic cation transmembrane transporter activity	4	0.510204	0.960156	ILMN_1803509, ILMN_1763387, ILMN_1810235, ILMN_1805807	558	151	12983	0.616345	1	0.999999	100
GOTERM_MF_FAT	GO:0016887~ATPase activity	9	1.14796	0.977251	ILMN_1803509, ILMN_1762093, ILMN_1715203, ILMN_1763387, ILMN_1810235, ILMN_1735735, ILMN_1698148, ILMN_1695645, ILMN_1669714	558	334	12983	0.626956	1	1	100
Annotation Cluster 164	Enrichment Score: 0.38516445907309454
Category	Term	Count	%	PValue	Genes	List Total	Pop Hits	Pop Total	Fold Enrichment	Bonferroni	Benjamini	FDR
GOTERM_CC_FAT	GO:0005624~membrane fraction	40	5.10204	0.371092	ILMN_1684321, ILMN_1737162, ILMN_1658835, ILMN_1768486, ILMN_1794863, ILMN_1676609, ILMN_1732636, ILMN_1778425, ILMN_1752750, ILMN_1708275, ILMN_1682929, ILMN_1697220, ILMN_1712075, ILMN_1752247, ILMN_1788131, ILMN_1736670, ILMN_1713829, ILMN_1697433, ILMN_1810782, ILMN_1812254, ILMN_1705231, ILMN_1767842, ILMN_1666904, ILMN_1763834, ILMN_1723969, ILMN_1673998, ILMN_1722037, ILMN_1751689, ILMN_18…	581	809	12782	1.08776	1	0.83071	99.8287
GOTERM_CC_FAT	GO:0000267~cell fraction	52	6.63265	0.403033	ILMN_1658835, ILMN_1676609, ILMN_1778425, ILMN_1708275, ILMN_1682929, ILMN_1712075, ILMN_1752247, ILMN_1788131, ILMN_1713829, ILMN_1697433, ILMN_1810782, ILMN_1793360, ILMN_1812254, ILMN_1758418, ILMN_1666904, ILMN_1763834, ILMN_1673998, ILMN_1805807, ILMN_1771800, ILMN_1761312, ILMN_1695003, ILMN_1808258, ILMN_1793006, ILMN_1733421, ILMN_1737611, ILMN_1684321, ILMN_1737162, ILMN_1768486, ILMN_16…	581	1083	12782	1.05633	1	0.843894	99.9163
GOTERM_CC_FAT	GO:0005626~insoluble fraction	40	5.10204	0.467394	ILMN_1684321, ILMN_1737162, ILMN_1658835, ILMN_1768486, ILMN_1794863, ILMN_1676609, ILMN_1732636, ILMN_1778425, ILMN_1752750, ILMN_1708275, ILMN_1682929, ILMN_1697220, ILMN_1712075, ILMN_1752247, ILMN_1788131, ILMN_1736670, ILMN_1713829, ILMN_1697433, ILMN_1810782, ILMN_1812254, ILMN_1705231, ILMN_1767842, ILMN_1666904, ILMN_1763834, ILMN_1723969, ILMN_1673998, ILMN_1722037, ILMN_1751689, ILMN_18…	581	839	12782	1.04887	1	0.884665	99.9825
Annotation Cluster 165	Enrichment Score: 0.38249234486061207
Category	Term	Count	%	PValue	Genes	List Total	Pop Hits	Pop Total	Fold Enrichment	Bonferroni	Benjamini	FDR
GOTERM_BP_FAT	GO:0008277~regulation of G-protein coupled receptor protein signaling pathway	4	0.510204	0.361315	ILMN_1758067, ILMN_1696828, ILMN_1658835, ILMN_1778267	568	51	13528	1.86799	1	0.963551	99.9643
UP_SEQ_FEATURE	domain:RGS	3	0.382653	0.390387	ILMN_1758067, ILMN_1696828, ILMN_1778267	778	33	19113	2.23335	1	0.999538	99.98
INTERPRO	IPR000342:Regulator of G protein signalling	3	0.382653	0.427098	ILMN_1758067, ILMN_1696828, ILMN_1778267	689	35	16659	2.07244	1	0.994807	99.9863
SP_PIR_KEYWORDS	Signal transduction inhibitor	3	0.382653	0.430046	ILMN_1758067, ILMN_1696828, ILMN_1778267	778	36	19235	2.0603	1	0.912051	99.9671
SMART	SM00315:RGS	3	0.382653	0.472186	ILMN_1758067, ILMN_1696828, ILMN_1778267	410	35	9079	1.89805	1	0.928786	99.9698
Annotation Cluster 166	Enrichment Score: 0.38171065388064007
Category	Term	Count	%	PValue	Genes	List Total	Pop Hits	Pop Total	Fold Enrichment	Bonferroni	Benjamini	FDR
INTERPRO	IPR012163:Sialyltransferase	3	0.382653	0.139687	ILMN_1756937, ILMN_1773959, ILMN_1756501	689	16	16659	4.53347	1	0.876912	90.9482
PIR_SUPERFAMILY	PIRSF005557:sialyltransferase	3	0.382653	0.14901	ILMN_1756937, ILMN_1773959, ILMN_1756501	319	16	7396	4.34718	1	0.99999	89.0763
PIR_SUPERFAMILY	PIRSF005557:Sialyl_trans	3	0.382653	0.14901	ILMN_1756937, ILMN_1773959, ILMN_1756501	319	16	7396	4.34718	1	0.99999	89.0763
INTERPRO	IPR001675:Glycosyl transferase, family 29	3	0.382653	0.199121	ILMN_1756937, ILMN_1773959, ILMN_1756501	689	20	16659	3.62678	1	0.933427	97.1135
GOTERM_MF_FAT	GO:0008373~sialyltransferase activity	3	0.382653	0.210941	ILMN_1756937, ILMN_1773959, ILMN_1756501	558	20	12983	3.49005	1	0.913543	97.3753
SP_PIR_KEYWORDS	glycosyltransferase	12	1.53061	0.248689	ILMN_1709907, ILMN_1802654, ILMN_1796682, ILMN_1738212, ILMN_1756937, ILMN_1788387, ILMN_1773959, ILMN_1718783, ILMN_1762167, ILMN_1756501, ILMN_1764813, ILMN_1704904	778	214	19235	1.38637	1	0.803764	98.306
GOTERM_CC_FAT	GO:0030173~integral to Golgi membrane	3	0.382653	0.587177	ILMN_1756937, ILMN_1773959, ILMN_1756501	581	43	12782	1.53488	1	0.940312	99.9995
GOTERM_CC_FAT	GO:0031228~intrinsic to Golgi membrane	3	0.382653	0.624141	ILMN_1756937, ILMN_1773959, ILMN_1756501	581	46	12782	1.43478	1	0.946902	99.9999
GOTERM_BP_FAT	GO:0043413~biopolymer glycosylation	6	0.765306	0.626807	ILMN_1709907, ILMN_1756937, ILMN_1788387, ILMN_1773959, ILMN_1753135, ILMN_1756501	568	128	13528	1.11642	1	0.994922	100
GOTERM_BP_FAT	GO:0070085~glycosylation	6	0.765306	0.626807	ILMN_1709907, ILMN_1756937, ILMN_1788387, ILMN_1773959, ILMN_1753135, ILMN_1756501	568	128	13528	1.11642	1	0.994922	100
GOTERM_BP_FAT	GO:0006486~protein amino acid glycosylation	6	0.765306	0.626807	ILMN_1709907, ILMN_1756937, ILMN_1788387, ILMN_1773959, ILMN_1753135, ILMN_1756501	568	128	13528	1.11642	1	0.994922	100
GOTERM_BP_FAT	GO:0009101~glycoprotein biosynthetic process	6	0.765306	0.797271	ILMN_1709907, ILMN_1756937, ILMN_1788387, ILMN_1773959, ILMN_1753135, ILMN_1756501	568	158	13528	0.904439	1	0.999372	100
GOTERM_BP_FAT	GO:0009100~glycoprotein metabolic process	7	0.892857	0.855438	ILMN_1709907, ILMN_1756937, ILMN_1788387, ILMN_1773959, ILMN_1789507, ILMN_1753135, ILMN_1756501	568	202	13528	0.825338	1	0.999807	100
GOTERM_CC_FAT	GO:0031300~intrinsic to organelle membrane	4	0.510204	0.964535	ILMN_1756937, ILMN_1773959, ILMN_1718783, ILMN_1756501	581	146	12782	0.60274	1	0.999527	100
GOTERM_CC_FAT	GO:0031301~integral to organelle membrane	3	0.382653	0.977799	ILMN_1756937, ILMN_1773959, ILMN_1756501	581	123	12782	0.536585	1	0.999766	100
Annotation Cluster 167	Enrichment Score: 0.35660834934981106
Category	Term	Count	%	PValue	Genes	List Total	Pop Hits	Pop Total	Fold Enrichment	Bonferroni	Benjamini	FDR
GOTERM_MF_FAT	GO:0051287~NAD or NADH binding	4	0.510204	0.327806	ILMN_1713756, ILMN_1751753, ILMN_1745817, ILMN_1736042	558	47	12983	1.98017	1	0.966821	99.7764
SP_PIR_KEYWORDS	nadp	8	1.02041	0.443181	ILMN_1720282, ILMN_1697433, ILMN_1705849, ILMN_1713756, ILMN_1751753, ILMN_1672389, ILMN_1736042, ILMN_1708987	778	156	19235	1.26788	1	0.916739	99.9764
GOTERM_MF_FAT	GO:0048037~cofactor binding	12	1.53061	0.498765	ILMN_1663575, ILMN_1720282, ILMN_1705849, ILMN_1713756, ILMN_1751753, ILMN_1797384, ILMN_1665775, ILMN_1745817, ILMN_1736042, ILMN_1726986, ILMN_1740265	558	249	12983	1.1213	1	0.990333	99.9975
GOTERM_MF_FAT	GO:0050662~coenzyme binding	9	1.14796	0.516979	ILMN_1663575, ILMN_1720282, ILMN_1705849, ILMN_1713756, ILMN_1751753, ILMN_1745817, ILMN_1736042, ILMN_1740265	558	181	12983	1.15692	1	0.991174	99.9986
Annotation Cluster 168	Enrichment Score: 0.354317365390292
Category	Term	Count	%	PValue	Genes	List Total	Pop Hits	Pop Total	Fold Enrichment	Bonferroni	Benjamini	FDR
GOTERM_BP_FAT	GO:0001508~regulation of action potential	5	0.637755	0.318354	ILMN_1672660, ILMN_1740508, ILMN_1676609, ILMN_1725772, ILMN_1790270	568	68	13528	1.75124	1	0.949456	99.8869
GOTERM_BP_FAT	GO:0019228~regulation of action potential in neuron	4	0.510204	0.395809	ILMN_1672660, ILMN_1740508, ILMN_1676609, ILMN_1725772	568	54	13528	1.76421	1	0.970689	99.9866
GOTERM_BP_FAT	GO:0042552~myelination	3	0.382653	0.477072	ILMN_1672660, ILMN_1676609, ILMN_1725772	568	38	13528	1.88028	1	0.983201	99.999
GOTERM_BP_FAT	GO:0008366~axon ensheathment	3	0.382653	0.530538	ILMN_1672660, ILMN_1676609, ILMN_1725772	568	42	13528	1.70121	1	0.988682	99.9998
GOTERM_BP_FAT	GO:0007272~ensheathment of neurons	3	0.382653	0.530538	ILMN_1672660, ILMN_1676609, ILMN_1725772	568	42	13528	1.70121	1	0.988682	99.9998
Annotation Cluster 169	Enrichment Score: 0.3425599994082896
Category	Term	Count	%	PValue	Genes	List Total	Pop Hits	Pop Total	Fold Enrichment	Bonferroni	Benjamini	FDR
GOTERM_MF_FAT	GO:0015103~inorganic anion transmembrane transporter activity	4	0.510204	0.166929	ILMN_1746116, ILMN_1663112, ILMN_1652465, ILMN_1739751	558	33	12983	2.82025	1	0.877902	93.9568
GOTERM_BP_FAT	GO:0006820~anion transport	7	0.892857	0.557546	ILMN_1746116, ILMN_1658835, ILMN_1707571, ILMN_1652465, ILMN_1767842, ILMN_1739751, ILMN_1785380	568	143	13528	1.16586	1	0.990834	99.9999
GOTERM_MF_FAT	GO:0008509~anion transmembrane transporter activity	7	0.892857	0.607706	ILMN_1746116, ILMN_1663112, ILMN_1707571, ILMN_1767154, ILMN_1652465, ILMN_1739751, ILMN_1785380	558	147	12983	1.10795	1	0.996096	99.9999
GOTERM_BP_FAT	GO:0015698~inorganic anion transport	4	0.510204	0.753794	ILMN_1658835, ILMN_1707571, ILMN_1652465, ILMN_1739751	568	93	13528	1.02438	1	0.998774	100
Annotation Cluster 170	Enrichment Score: 0.33960545375975776
Category	Term	Count	%	PValue	Genes	List Total	Pop Hits	Pop Total	Fold Enrichment	Bonferroni	Benjamini	FDR
GOTERM_MF_FAT	GO:0005506~iron ion binding	18	2.29592	0.171356	ILMN_1684321, ILMN_1744628, ILMN_1800332, ILMN_1708275, ILMN_1696254, ILMN_1697220, ILMN_1657373, ILMN_1720889, ILMN_1735432, ILMN_1788131, ILMN_1696183, ILMN_1663575, ILMN_1697433, ILMN_1652017, ILMN_1683146, ILMN_1771179, ILMN_1680727	558	308	12983	1.35976	1	0.881612	94.4318
SP_PIR_KEYWORDS	iron	15	1.91327	0.263548	ILMN_1684321, ILMN_1744628, ILMN_1800332, ILMN_1708275, ILMN_1657373, ILMN_1720889, ILMN_1735432, ILMN_1788131, ILMN_1696183, ILMN_1663575, ILMN_1697433, ILMN_1683146, ILMN_1652017, ILMN_1771179, ILMN_1680727	778	285	19235	1.30124	1	0.813758	98.7259
SP_PIR_KEYWORDS	heme	7	0.892857	0.36384	ILMN_1684321, ILMN_1697433, ILMN_1800332, ILMN_1771179, ILMN_1708275, ILMN_1788131, ILMN_1696183	778	121	19235	1.43029	1	0.873921	99.8421
UP_SEQ_FEATURE	metal ion-binding site:Iron (heme axial ligand)	6	0.765306	0.367912	ILMN_1684321, ILMN_1663575, ILMN_1697433, ILMN_1771179, ILMN_1708275, ILMN_1788131	778	98	19113	1.50409	1	0.999425	99.9627
GOTERM_MF_FAT	GO:0020037~heme binding	7	0.892857	0.418381	ILMN_1684321, ILMN_1697433, ILMN_1800332, ILMN_1708275, ILMN_1696254, ILMN_1788131, ILMN_1696183	558	121	12983	1.34603	1	0.982481	99.9758
GOTERM_MF_FAT	GO:0046906~tetrapyrrole binding	7	0.892857	0.479393	ILMN_1684321, ILMN_1697433, ILMN_1800332, ILMN_1708275, ILMN_1696254, ILMN_1788131, ILMN_1696183	558	129	12983	1.26255	1	0.989279	99.9956
GOTERM_MF_FAT	GO:0019825~oxygen binding	3	0.382653	0.556159	ILMN_1800332, ILMN_1788131, ILMN_1696183	558	43	12983	1.62328	1	0.993502	99.9996
SP_PIR_KEYWORDS	microsome	4	0.510204	0.807076	ILMN_1697433, ILMN_1676609, ILMN_1708275, ILMN_1788131	778	106	19235	0.932968	1	0.993193	100
GOTERM_CC_FAT	GO:0005792~microsome	9	1.14796	0.848759	ILMN_1684321, ILMN_1713829, ILMN_1697433, ILMN_1676609, ILMN_1689251, ILMN_1708275, ILMN_1788131, ILMN_1736670, ILMN_1707077	581	237	12782	0.835443	1	0.992227	100
GOTERM_CC_FAT	GO:0042598~vesicular fraction	9	1.14796	0.869706	ILMN_1684321, ILMN_1713829, ILMN_1697433, ILMN_1676609, ILMN_1689251, ILMN_1708275, ILMN_1788131, ILMN_1736670, ILMN_1707077	581	244	12782	0.811475	1	0.993653	100
Annotation Cluster 171	Enrichment Score: 0.33681285901035607
Category	Term	Count	%	PValue	Genes	List Total	Pop Hits	Pop Total	Fold Enrichment	Bonferroni	Benjamini	FDR
GOTERM_MF_FAT	GO:0004601~peroxidase activity	3	0.382653	0.40174	ILMN_1749662, ILMN_1725241, ILMN_1708275	558	32	12983	2.18128	1	0.98062	99.9627
GOTERM_MF_FAT	GO:0016684~oxidoreductase activity, acting on peroxide as acceptor	3	0.382653	0.40174	ILMN_1749662, ILMN_1725241, ILMN_1708275	558	32	12983	2.18128	1	0.98062	99.9627
GOTERM_MF_FAT	GO:0016209~antioxidant activity	3	0.382653	0.604883	ILMN_1749662, ILMN_1725241, ILMN_1708275	558	47	12983	1.48513	1	0.996089	99.9999
Annotation Cluster 172	Enrichment Score: 0.3338991756737373
Category	Term	Count	%	PValue	Genes	List Total	Pop Hits	Pop Total	Fold Enrichment	Bonferroni	Benjamini	FDR
GOTERM_BP_FAT	GO:0009991~response to extracellular stimulus	12	1.53061	0.318595	ILMN_1673998, ILMN_1701603, ILMN_1712943, ILMN_1668830, ILMN_1698554, ILMN_1812824, ILMN_1814719, ILMN_1731062, ILMN_1725193, ILMN_1710859, ILMN_1680727, ILMN_1785380	568	220	13528	1.2991	1	0.949139	99.8876
GOTERM_BP_FAT	GO:0031667~response to nutrient levels	10	1.27551	0.444235	ILMN_1673998, ILMN_1701603, ILMN_1712943, ILMN_1668830, ILMN_1698554, ILMN_1812824, ILMN_1814719, ILMN_1731062, ILMN_1725193, ILMN_1710859	568	197	13528	1.20898	1	0.97879	99.997
GOTERM_BP_FAT	GO:0007584~response to nutrient	6	0.765306	0.703802	ILMN_1673998, ILMN_1701603, ILMN_1698554, ILMN_1812824, ILMN_1814719, ILMN_1725193	568	140	13528	1.02072	1	0.997627	100
Annotation Cluster 173	Enrichment Score: 0.3308046007238345
Category	Term	Count	%	PValue	Genes	List Total	Pop Hits	Pop Total	Fold Enrichment	Bonferroni	Benjamini	FDR
GOTERM_BP_FAT	GO:0010906~regulation of glucose metabolic process	3	0.382653	0.43462	ILMN_1679754, ILMN_1682757, ILMN_1736670	568	35	13528	2.04145	1	0.976938	99.9959
GOTERM_BP_FAT	GO:0010675~regulation of cellular carbohydrate metabolic process	3	0.382653	0.477072	ILMN_1679754, ILMN_1682757, ILMN_1736670	568	38	13528	1.88028	1	0.983201	99.999
GOTERM_BP_FAT	GO:0006109~regulation of carbohydrate metabolic process	3	0.382653	0.490786	ILMN_1679754, ILMN_1682757, ILMN_1736670	568	39	13528	1.83207	1	0.984891	99.9994
Annotation Cluster 174	Enrichment Score: 0.32303354722562655
Category	Term	Count	%	PValue	Genes	List Total	Pop Hits	Pop Total	Fold Enrichment	Bonferroni	Benjamini	FDR
GOTERM_BP_FAT	GO:0016125~sterol metabolic process	6	0.765306	0.417719	ILMN_1697433, ILMN_1773063, ILMN_1692163, ILMN_1720889, ILMN_1797728, ILMN_1766654	568	101	13528	1.41487	1	0.974496	99.993
GOTERM_BP_FAT	GO:0008202~steroid metabolic process	10	1.27551	0.474095	ILMN_1735798, ILMN_1697433, ILMN_1668035, ILMN_1773063, ILMN_1669497, ILMN_1692163, ILMN_1720889, ILMN_1797728, ILMN_1721559, ILMN_1766654	568	202	13528	1.17905	1	0.982761	99.9989
GOTERM_BP_FAT	GO:0008203~cholesterol metabolic process	5	0.637755	0.542188	ILMN_1697433, ILMN_1773063, ILMN_1692163, ILMN_1797728, ILMN_1766654	568	92	13528	1.2944	1	0.989614	99.9999
Annotation Cluster 175	Enrichment Score: 0.32217687841952736
Category	Term	Count	%	PValue	Genes	List Total	Pop Hits	Pop Total	Fold Enrichment	Bonferroni	Benjamini	FDR
GOTERM_BP_FAT	GO:0000188~inactivation of MAPK activity	3	0.382653	0.203631	ILMN_1758067, ILMN_1771800, ILMN_1671809	568	20	13528	3.57254	1	0.885367	98.2239
GOTERM_BP_FAT	GO:0043407~negative regulation of MAP kinase activity	3	0.382653	0.448982	ILMN_1758067, ILMN_1771800, ILMN_1671809	568	36	13528	1.98474	1	0.979751	99.9974
GOTERM_BP_FAT	GO:0006469~negative regulation of protein kinase activity	5	0.637755	0.497948	ILMN_1758067, ILMN_1771800, ILMN_1779875, ILMN_1671809, ILMN_1689043	568	87	13528	1.36879	1	0.98544	99.9995
GOTERM_BP_FAT	GO:0033673~negative regulation of kinase activity	5	0.637755	0.524724	ILMN_1758067, ILMN_1771800, ILMN_1779875, ILMN_1671809, ILMN_1689043	568	90	13528	1.32316	1	0.988314	99.9998
GOTERM_BP_FAT	GO:0051348~negative regulation of transferase activity	5	0.637755	0.576095	ILMN_1758067, ILMN_1771800, ILMN_1779875, ILMN_1671809, ILMN_1689043	568	96	13528	1.24046	1	0.992271	100
GOTERM_BP_FAT	GO:0043405~regulation of MAP kinase activity	5	0.637755	0.847728	ILMN_1758067, ILMN_1771800, ILMN_1715496, ILMN_1671809, ILMN_1698307	568	141	13528	0.844571	1	0.999771	100
Annotation Cluster 176	Enrichment Score: 0.3196898436654369
Category	Term	Count	%	PValue	Genes	List Total	Pop Hits	Pop Total	Fold Enrichment	Bonferroni	Benjamini	FDR
GOTERM_BP_FAT	GO:0043193~positive regulation of gene-specific transcription	6	0.765306	0.30071	ILMN_1750181, ILMN_1810559, ILMN_1742544, ILMN_1682738, ILMN_1746658, ILMN_1671843	568	87	13528	1.64254	1	0.941928	99.8222
GOTERM_BP_FAT	GO:0032583~regulation of gene-specific transcription	8	1.02041	0.330647	ILMN_1750181, ILMN_1810559, ILMN_1742544, ILMN_1682738, ILMN_1711208, ILMN_1672094, ILMN_1746658, ILMN_1671843	568	134	13528	1.4219	1	0.953624	99.918
GOTERM_BP_FAT	GO:0010552~positive regulation of specific transcription from RNA polymerase II promoter	3	0.382653	0.696301	ILMN_1810559, ILMN_1742544, ILMN_1682738	568	57	13528	1.25352	1	0.997404	100
GOTERM_BP_FAT	GO:0010551~regulation of specific transcription from RNA polymerase II promoter	4	0.510204	0.760206	ILMN_1810559, ILMN_1742544, ILMN_1682738, ILMN_1672094	568	94	13528	1.01349	1	0.998891	100
Annotation Cluster 177	Enrichment Score: 0.316064292110007
Category	Term	Count	%	PValue	Genes	List Total	Pop Hits	Pop Total	Fold Enrichment	Bonferroni	Benjamini	FDR
GOTERM_BP_FAT	GO:0048511~rhythmic process	10	1.27551	0.0890313	ILMN_1667081, ILMN_1718198, ILMN_1656383, ILMN_1712475, ILMN_1740508, ILMN_1758400, ILMN_1668035, ILMN_1713471, ILMN_1757497, ILMN_1765558	568	128	13528	1.8607	1	0.678229	80.8088
GOTERM_BP_FAT	GO:0046660~female sex differentiation	5	0.637755	0.327942	ILMN_1667081, ILMN_1656383, ILMN_1757497, ILMN_1766675, ILMN_1814719	568	69	13528	1.72586	1	0.953032	99.912
GOTERM_BP_FAT	GO:0046545~development of primary female sexual characteristics	5	0.637755	0.327942	ILMN_1667081, ILMN_1656383, ILMN_1757497, ILMN_1766675, ILMN_1814719	568	69	13528	1.72586	1	0.953032	99.912
GOTERM_BP_FAT	GO:0032868~response to insulin stimulus	6	0.765306	0.409369	ILMN_1667081, ILMN_1810559, ILMN_1757497, ILMN_1814719, ILMN_1733421, ILMN_1707077	568	100	13528	1.42901	1	0.973474	99.9911
GOTERM_BP_FAT	GO:0022602~ovulation cycle process	4	0.510204	0.484766	ILMN_1667081, ILMN_1718198, ILMN_1656383, ILMN_1757497	568	62	13528	1.53657	1	0.984226	99.9992
GOTERM_BP_FAT	GO:0008585~female gonad development	4	0.510204	0.506042	ILMN_1667081, ILMN_1656383, ILMN_1757497, ILMN_1766675	568	64	13528	1.48856	1	0.986273	99.9996
GOTERM_BP_FAT	GO:0001541~ovarian follicle development	3	0.382653	0.517524	ILMN_1667081, ILMN_1656383, ILMN_1757497	568	41	13528	1.7427	1	0.987599	99.9998
GOTERM_BP_FAT	GO:0042698~ovulation cycle	4	0.510204	0.537074	ILMN_1667081, ILMN_1718198, ILMN_1656383, ILMN_1757497	568	67	13528	1.4219	1	0.989254	99.9999
GOTERM_BP_FAT	GO:0008406~gonad development	5	0.637755	0.696235	ILMN_1667081, ILMN_1656383, ILMN_1757497, ILMN_1766675, ILMN_1814719	568	112	13528	1.06325	1	0.997432	100
GOTERM_BP_FAT	GO:0003006~reproductive developmental process	10	1.27551	0.774625	ILMN_1796589, ILMN_1667081, ILMN_1746116, ILMN_1656383, ILMN_1784783, ILMN_1757497, ILMN_1766675, ILMN_1814719, ILMN_1660732, ILMN_1775736	568	262	13528	0.909042	1	0.999108	100
GOTERM_BP_FAT	GO:0048608~reproductive structure development	5	0.637755	0.779631	ILMN_1667081, ILMN_1656383, ILMN_1757497, ILMN_1766675, ILMN_1814719	568	126	13528	0.945115	1	0.999166	100
GOTERM_BP_FAT	GO:0045137~development of primary sexual characteristics	5	0.637755	0.784827	ILMN_1667081, ILMN_1656383, ILMN_1757497, ILMN_1766675, ILMN_1814719	568	127	13528	0.937673	1	0.999225	100
GOTERM_BP_FAT	GO:0007548~sex differentiation	5	0.637755	0.882511	ILMN_1667081, ILMN_1656383, ILMN_1757497, ILMN_1766675, ILMN_1814719	568	151	13528	0.788639	1	0.999902	100
Annotation Cluster 178	Enrichment Score: 0.3090155227816591
Category	Term	Count	%	PValue	Genes	List Total	Pop Hits	Pop Total	Fold Enrichment	Bonferroni	Benjamini	FDR
GOTERM_BP_FAT	GO:0007018~microtubule-based movement	8	1.02041	0.195807	ILMN_1791726, ILMN_1809632, ILMN_1666625, ILMN_1715203, ILMN_1812254, ILMN_1659086, ILMN_1757387, ILMN_1780769	568	113	13528	1.68615	1	0.879002	97.8883
GOTERM_BP_FAT	GO:0007017~microtubule-based process	13	1.65816	0.373239	ILMN_1791726, ILMN_1809632, ILMN_1658835, ILMN_1745593, ILMN_1659086, ILMN_1764043, ILMN_1671843, ILMN_1666625, ILMN_1715203, ILMN_1812254, ILMN_1757387, ILMN_1780769, ILMN_1695645	568	253	13528	1.22379	1	0.965738	99.9744
SP_PIR_KEYWORDS	microtubule	10	1.27551	0.59161	ILMN_1791726, ILMN_1666625, ILMN_1715203, ILMN_1772366, ILMN_1812254, ILMN_1745593, ILMN_1681777, ILMN_1774132, ILMN_1780769, ILMN_1735735	778	231	19235	1.07029	1	0.961891	99.9997
GOTERM_CC_FAT	GO:0005874~microtubule	11	1.40306	0.802482	ILMN_1791726, ILMN_1768486, ILMN_1666625, ILMN_1715203, ILMN_1772366, ILMN_1812254, ILMN_1745593, ILMN_1681777, ILMN_1774132, ILMN_1780769, ILMN_1735735	581	274	12782	0.883212	1	0.986768	100
GOTERM_CC_FAT	GO:0015630~microtubule cytoskeleton	22	2.80612	0.821553	ILMN_1791726, ILMN_1796682, ILMN_1768486, ILMN_1795937, ILMN_1772366, ILMN_1770084, ILMN_1726415, ILMN_1745593, ILMN_1730845, ILMN_1676422, ILMN_1653161, ILMN_1735735, ILMN_1671843, ILMN_1696828, ILMN_1666625, ILMN_1715203, ILMN_1812254, ILMN_1681777, ILMN_1776967, ILMN_1774132, ILMN_1780769, ILMN_1695645	581	549	12782	0.881603	1	0.989206	100
Annotation Cluster 179	Enrichment Score: 0.30554494993670395
Category	Term	Count	%	PValue	Genes	List Total	Pop Hits	Pop Total	Fold Enrichment	Bonferroni	Benjamini	FDR
GOTERM_BP_FAT	GO:0032642~regulation of chemokine production	3	0.382653	0.128585	ILMN_1724863, ILMN_1758939, ILMN_1807981	568	15	13528	4.76338	1	0.777653	91.2538
GOTERM_BP_FAT	GO:0031349~positive regulation of defense response	6	0.765306	0.190886	ILMN_1771800, ILMN_1724863, ILMN_1718198, ILMN_1758939, ILMN_1654072, ILMN_1790270	568	73	13528	1.95755	1	0.873613	97.6475
GOTERM_BP_FAT	GO:0050671~positive regulation of lymphocyte proliferation	5	0.637755	0.198307	ILMN_1724863, ILMN_1758939, ILMN_1758418, ILMN_1790270, ILMN_1733421	568	55	13528	2.16517	1	0.880707	98.0016
GOTERM_BP_FAT	GO:0070665~positive regulation of leukocyte proliferation	5	0.637755	0.207052	ILMN_1724863, ILMN_1758939, ILMN_1758418, ILMN_1790270, ILMN_1733421	568	56	13528	2.12651	1	0.888173	98.3542
GOTERM_BP_FAT	GO:0032946~positive regulation of mononuclear cell proliferation	5	0.637755	0.207052	ILMN_1724863, ILMN_1758939, ILMN_1758418, ILMN_1790270, ILMN_1733421	568	56	13528	2.12651	1	0.888173	98.3542
GOTERM_BP_FAT	GO:0051092~positive regulation of NF-kappaB transcription factor activity	4	0.510204	0.245858	ILMN_1724863, ILMN_1758939, ILMN_1666445, ILMN_1733421	568	41	13528	2.3236	1	0.915069	99.323
GOTERM_BP_FAT	GO:0043331~response to dsRNA	3	0.382653	0.282158	ILMN_1724863, ILMN_1758939, ILMN_1682738	568	25	13528	2.85803	1	0.935943	99.7173
GOTERM_BP_FAT	GO:0051251~positive regulation of lymphocyte activation	6	0.765306	0.384234	ILMN_1724863, ILMN_1758939, ILMN_1779875, ILMN_1758418, ILMN_1790270, ILMN_1733421	568	97	13528	1.47321	1	0.968052	99.9813
GOTERM_BP_FAT	GO:0032496~response to lipopolysaccharide	5	0.637755	0.404735	ILMN_1743455, ILMN_1724863, ILMN_1758939, ILMN_1790270, ILMN_1710859	568	77	13528	1.54655	1	0.972804	99.9897
GOTERM_BP_FAT	GO:0051090~regulation of transcription factor activity	6	0.765306	0.434358	ILMN_1724863, ILMN_1758939, ILMN_1807981, ILMN_1666445, ILMN_1712026, ILMN_1733421	568	103	13528	1.38739	1	0.97709	99.9958
GOTERM_BP_FAT	GO:0002696~positive regulation of leukocyte activation	6	0.765306	0.459113	ILMN_1724863, ILMN_1758939, ILMN_1779875, ILMN_1758418, ILMN_1790270, ILMN_1733421	568	106	13528	1.34813	1	0.981513	99.9981
GOTERM_BP_FAT	GO:0050670~regulation of lymphocyte proliferation	5	0.637755	0.461291	ILMN_1724863, ILMN_1758939, ILMN_1758418, ILMN_1790270, ILMN_1733421	568	83	13528	1.43475	1	0.981808	99.9982
GOTERM_BP_FAT	GO:0051091~positive regulation of transcription factor activity	4	0.510204	0.463061	ILMN_1724863, ILMN_1758939, ILMN_1666445, ILMN_1733421	568	60	13528	1.58779	1	0.98183	99.9983
GOTERM_BP_FAT	GO:0070663~regulation of leukocyte proliferation	5	0.637755	0.470548	ILMN_1724863, ILMN_1758939, ILMN_1758418, ILMN_1790270, ILMN_1733421	568	84	13528	1.41767	1	0.982714	99.9987
GOTERM_BP_FAT	GO:0032944~regulation of mononuclear cell proliferation	5	0.637755	0.470548	ILMN_1724863, ILMN_1758939, ILMN_1758418, ILMN_1790270, ILMN_1733421	568	84	13528	1.41767	1	0.982714	99.9987
GOTERM_BP_FAT	GO:0002237~response to molecule of bacterial origin	5	0.637755	0.48888	ILMN_1743455, ILMN_1724863, ILMN_1758939, ILMN_1790270, ILMN_1710859	568	86	13528	1.3847	1	0.984691	99.9993
GOTERM_BP_FAT	GO:0042102~positive regulation of T cell proliferation	3	0.382653	0.490786	ILMN_1758939, ILMN_1758418, ILMN_1733421	568	39	13528	1.83207	1	0.984891	99.9994
GOTERM_BP_FAT	GO:0050867~positive regulation of cell activation	6	0.765306	0.499628	ILMN_1724863, ILMN_1758939, ILMN_1779875, ILMN_1758418, ILMN_1790270, ILMN_1733421	568	111	13528	1.2874	1	0.985592	99.9995
GOTERM_BP_FAT	GO:0043388~positive regulation of DNA binding	4	0.510204	0.566966	ILMN_1724863, ILMN_1758939, ILMN_1666445, ILMN_1733421	568	70	13528	1.36097	1	0.991638	100
GOTERM_BP_FAT	GO:0051101~regulation of DNA binding	6	0.765306	0.576751	ILMN_1724863, ILMN_1758939, ILMN_1807981, ILMN_1666445, ILMN_1712026, ILMN_1733421	568	121	13528	1.181	1	0.992173	100
GOTERM_BP_FAT	GO:0051249~regulation of lymphocyte activation	7	0.892857	0.591382	ILMN_1724863, ILMN_1758939, ILMN_1779875, ILMN_1758418, ILMN_1790270, ILMN_1733421, ILMN_1733519	568	148	13528	1.12648	1	0.993074	100
GOTERM_BP_FAT	GO:0042035~regulation of cytokine biosynthetic process	4	0.510204	0.604925	ILMN_1724863, ILMN_1807981, ILMN_1733421, ILMN_1693014	568	74	13528	1.2874	1	0.993665	100
GOTERM_BP_FAT	GO:0050870~positive regulation of T cell activation	4	0.510204	0.623059	ILMN_1758939, ILMN_1779875, ILMN_1758418, ILMN_1733421	568	76	13528	1.25352	1	0.994758	100
GOTERM_BP_FAT	GO:0051098~regulation of binding	7	0.892857	0.623817	ILMN_1724863, ILMN_1758939, ILMN_1807981, ILMN_1666445, ILMN_1712026, ILMN_1682738, ILMN_1733421	568	153	13528	1.08966	1	0.994757	100
GOTERM_BP_FAT	GO:0050864~regulation of B cell activation	3	0.382653	0.636619	ILMN_1724863, ILMN_1758418, ILMN_1733519	568	51	13528	1.40099	1	0.995447	100
GOTERM_BP_FAT	GO:0001817~regulation of cytokine production	8	1.02041	0.639536	ILMN_1724863, ILMN_1758939, ILMN_1807981, ILMN_1788184, ILMN_1712026, ILMN_1682738, ILMN_1733421, ILMN_1693014	568	181	13528	1.05268	1	0.995589	100
GOTERM_BP_FAT	GO:0051099~positive regulation of binding	4	0.510204	0.640616	ILMN_1724863, ILMN_1758939, ILMN_1666445, ILMN_1733421	568	78	13528	1.22138	1	0.995511	100
GOTERM_BP_FAT	GO:0002757~immune response-activating signal transduction	3	0.382653	0.647169	ILMN_1724863, ILMN_1758939, ILMN_1779875	568	52	13528	1.37405	1	0.995741	100
GOTERM_BP_FAT	GO:0034097~response to cytokine stimulus	4	0.510204	0.649176	ILMN_1771800, ILMN_1743455, ILMN_1758939, ILMN_1710859	568	79	13528	1.20592	1	0.995773	100
GOTERM_BP_FAT	GO:0002764~immune response-regulating signal transduction	3	0.382653	0.68695	ILMN_1724863, ILMN_1758939, ILMN_1779875	568	56	13528	1.27591	1	0.997212	100
GOTERM_BP_FAT	GO:0002694~regulation of leukocyte activation	7	0.892857	0.700816	ILMN_1724863, ILMN_1758939, ILMN_1779875, ILMN_1758418, ILMN_1790270, ILMN_1733421, ILMN_1733519	568	166	13528	1.00433	1	0.997535	100
GOTERM_BP_FAT	GO:0001819~positive regulation of cytokine production	4	0.510204	0.733733	ILMN_1724863, ILMN_1758939, ILMN_1712026, ILMN_1682738	568	90	13528	1.05853	1	0.998359	100
GOTERM_BP_FAT	GO:0042129~regulation of T cell proliferation	3	0.382653	0.739636	ILMN_1758939, ILMN_1758418, ILMN_1733421	568	62	13528	1.15243	1	0.998491	100
GOTERM_BP_FAT	GO:0050865~regulation of cell activation	7	0.892857	0.747504	ILMN_1724863, ILMN_1758939, ILMN_1779875, ILMN_1758418, ILMN_1790270, ILMN_1733421, ILMN_1733519	568	175	13528	0.952676	1	0.998666	100
GOTERM_BP_FAT	GO:0002253~activation of immune response	4	0.510204	0.760206	ILMN_1724863, ILMN_1758939, ILMN_1779875, ILMN_1777190	568	94	13528	1.01349	1	0.998891	100
GOTERM_BP_FAT	GO:0050778~positive regulation of immune response	5	0.637755	0.862572	ILMN_1724863, ILMN_1758939, ILMN_1779875, ILMN_1777190, ILMN_1758418	568	145	13528	0.821272	1	0.999839	100
GOTERM_BP_FAT	GO:0050863~regulation of T cell activation	4	0.510204	0.873598	ILMN_1758939, ILMN_1779875, ILMN_1758418, ILMN_1733421	568	117	13528	0.814253	1	0.999874	100
GOTERM_BP_FAT	GO:0009617~response to bacterium	6	0.765306	0.911652	ILMN_1743455, ILMN_1724863, ILMN_1758939, ILMN_1749662, ILMN_1790270, ILMN_1710859	568	193	13528	0.740422	1	0.999964	100
GOTERM_BP_FAT	GO:0002684~positive regulation of immune system process	7	0.892857	0.937607	ILMN_1724863, ILMN_1758939, ILMN_1779875, ILMN_1777190, ILMN_1758418, ILMN_1790270, ILMN_1733421	568	238	13528	0.700497	1	0.999989	100
Annotation Cluster 180	Enrichment Score: 0.2956271368224603
Category	Term	Count	%	PValue	Genes	List Total	Pop Hits	Pop Total	Fold Enrichment	Bonferroni	Benjamini	FDR
GOTERM_BP_FAT	GO:0003001~generation of a signal involved in cell-cell signaling	6	0.765306	0.284299	ILMN_1810550, ILMN_1757497, ILMN_1665219, ILMN_1693604, ILMN_1757081, ILMN_1809695	568	85	13528	1.68119	1	0.936952	99.7319
GOTERM_BP_FAT	GO:0030072~peptide hormone secretion	3	0.382653	0.490786	ILMN_1757497, ILMN_1665219, ILMN_1809695	568	39	13528	1.83207	1	0.984891	99.9994
GOTERM_BP_FAT	GO:0002790~peptide secretion	3	0.382653	0.517524	ILMN_1757497, ILMN_1665219, ILMN_1809695	568	41	13528	1.7427	1	0.987599	99.9998
GOTERM_BP_FAT	GO:0046879~hormone secretion	3	0.382653	0.568124	ILMN_1757497, ILMN_1665219, ILMN_1809695	568	45	13528	1.58779	1	0.991677	100
GOTERM_BP_FAT	GO:0009914~hormone transport	3	0.382653	0.614779	ILMN_1757497, ILMN_1665219, ILMN_1809695	568	49	13528	1.45818	1	0.994295	100
GOTERM_BP_FAT	GO:0015833~peptide transport	3	0.382653	0.667539	ILMN_1757497, ILMN_1665219, ILMN_1809695	568	54	13528	1.32316	1	0.996462	100
Annotation Cluster 181	Enrichment Score: 0.29445635720547525
Category	Term	Count	%	PValue	Genes	List Total	Pop Hits	Pop Total	Fold Enrichment	Bonferroni	Benjamini	FDR
[truncated: 540 more rows]
